# Supplementary material for: A conditional gene-based association framework integrating isoform-level eQTL data reveals new susceptibility genes for schizophrenia
Source: eLife. 2022 Apr 12;11:e70779. doi: 10.7554/eLife.70779 (PMC9005191; doi:10.7554/eLife.70779)
Supplement: Figure 6—source data 1. [file elife-70779-fig6-data1.xlsx]

## Sheet: significant_genes_MAGMA
Significant genes identified by MAGMA
TRIM38
TRIM39
PCGF3
RNF5
CNNM2
CFB
RPS27
RRAS
CLIP1
RTN1
ATXN7
SDCCAG8
SEPT3
SERF2
SF3B1
SGCD
ST3GAL3
SKIV2L
SLC17A1
SLC17A2
SLC17A3
SLC17A4
SLC32A1
BRD2
SOX5
SREBF2
SRF
SRPK2
BTN1A1
STAG1
BTN2A1
STAT6
BTN2A2
BTN3A1
BTN3A2
STK19
NEK4
BTN3A3
SYNGAP1
TAPBP
TBX6
TCF19
TCF20
TCF4
TGM5
THRB
TM6SF2
TNF
GIGYF2
TNXB
TP53BP1
TRPC4
C2
VARS
VRK2
WNT3
XRCC3
YWHAE
SLC39A1
ZNF165
TRIM26
ZNF184
ZSCAN26
ZKSCAN8
ZSCAN9
ZNF281
ZNF35
ZSCAN12
BCL11B
C4A
FAM120A
CALN1
PBX4
PCLO
RBMS3
ARFGAP2
VPS9D1
SPOCK3
HIST1H2AH
CA14
BCL2L12
CA8
ZNF311
ZBED9
ZKSCAN3
ZKSCAN4
CACNA1C
APOM
DDX39B
PRRC2A
BAG6
GPANK1
C6orf15
CCHCR1
LY6G5B
LY6G5C
LY6G6F
LY6G6C
SAPCD1
VWA7
LSM2
SLC44A4
PRRT1
EGFL8
GPSM3
FKBPL
HIST1H2BK
CACNA1I
MAS1L
OR12D3
OR2B2
OR14J1
POM121L2
NELFE
CDK2AP1
CACNB2
CSMD1
BACH2
ZSCAN31
EHMT2
LST1
BOLL
IFT81
VPS29
ELOVL1
BBX
VPS45
IMMP2L
LETM2
ACTR5
ZEB2
PPP1R13B
SNX8
SNAP91
TRIM8
LRRC4
TLR9
PPP1R16B
CUL9
STRC
PAK6
PPDPF
TRIM9
TRIM31
TUBGCP4
SORCS3
TAOK2
CLP1
SLC16A10
VSIG2
PLA2G15
NDUFA13
PSORS1C2
PSORS1C1
CDC20
MOB4
IP6K3
NEGR1
ABT1
ANAPC7
ADGRV1
AS3MT
ESAM
ALPK3
SEC11A
SMG6
SLC45A1
NOSIP
REEP2
CDSN
RNF38
ARL6IP4
TRPV4
ZNF365
RBFOX1
BANK1
YPEL3
YPEL4
CENPM
SFTA2
HYPK
AGO3
AGO4
ZDHHC2
ZDHHC5
NDFIP2
STAB1
SUGP1
ZNF391
ZFP57
UBD
CATSPER2
STH
CREB3L4
CREB3L1
ZBTB12
C6orf47
NCR3
C6orf48
TBC1D5
SDK1
NPAS3
NRBP2
ALG12
PGBD1
CHRM4
CHRNA3
CHRNA5
CHRNB4
CLSPN
TTC7B
GALNT10
ZNF407
TRAPPC3
MED8
ZNF408
CLCN3
SFMBT1
RBM26
PRICKLE2
APOPT1
CLIC1
ZBED4
FANCL
ZFYVE21
TUBB
ZSCAN16
THAP3
CLU
ZSCAN2
PITPNM2
CUTA
ATAT1
ZSCAN23
RPP21
C6orf136
SNX19
EYS
NKAPL
SATB2
VARS2
RAD9B
CNTN4
CPEB1
MUSTN1
KIAA1549
KCTD13
TMED4
KDM4A
ELL3
ZNF276
SPCS1
ATF6B
NSUN6
CRHR1
SLCO4C1
SLCO6A1
ZNF322
TTC12
TRMT61A
DND1
CILP2
GLYCTK
PLEKHO1
KANSL1
SPATS2L
CSNK2B
ANKS1B
TTC14
YJEFN3
ANKRD45
GMIP
GLT8D1
GSX2
DNAJB7
SMDT1
KLHL20
GLB1L2
MARS2
CTNND1
TMEM219
FAM49B
ANKRD44
FAM57B
ZNF664
ENOX1
MAP7D1
DNAJC11
TBC1D15
NT5DC2
COQ10B
OGFOD2
WDR73
CYP17A1
WDR55
AMBRA1
TCTN1
SETD6
MAP9
RBFA
PQLC1
ZCCHC7
CYP2D6
MSANTD2
C16orf92
RFTN2
ZMAT2
TSNARE1
SPATA33
PPM1M
HARBI1
ZSCAN29
TYW5
C12orf65
LACC1
C2orf69
C1orf216
DAXX
INO80E
CXXC5
HYI
DCC
DDAH2
GOLGA6L4
DDR1
ASPHD1
RCOR2
ZNF852
CRELD2
HVCN1
ZBTB9
WBP2NL
SPATA2L
DGKI
DGKZ
GDPD3
RILPL2
TMCO6
WDR82
SPPL2C
CKAP5
ZNF592
TRANK1
PPIP5K1
ZNF536
ATG2A
SZT2
KLHL21
DENND4B
LRRC37A
ATG13
ARHGAP44
DDHD2
DLX1
MAU2
DLX2
PRR12
HEATR5B
ZSWIM6
APH1A
CCDC92
MACROD1
MED19
DOC2A
THOC7
GNL3
GATAD2A
DPEP1
LPCAT4
PBRM1
DPYD
FAM216A
GPN3
DRD2
SEMA3G
SCAF1
TSSK6
EMB
DNAJC19
SPHKAP
PPTC7
TMX2
GATAD2B
TGM7
HAPLN4
LPAR2
CKMT1A
ADAL
EEF1A2
AGER
SERINC4
EFNA5
IGSF9B
ARL17B
AGPAT1
AGO1
C12orf76
EPHA5
ERBB4
HYKK
ETF1
AIF1
F2
FANCA
FES
FGFR1
FHIT
BTBD18
SMIM4
FLOT1
FOXP1
TRIM39-RPP21
AKT3
ALAS1
MUC22
ABCB1
ANKRD63
FXR1
GALNT2
ALDOA
ALMS1
GPM6A
UBE2Q2L
GRIN2A
GRM3
PDIA3
GTF2H4
HIST1H1A
HIST1H1C
HIST1H1E
HIST1H1B
HIST1H1T
HIST1H2AI
HIST1H2AK
HIST1H2AJ
HIST1H2AL
HIST1H2AC
HIST1H2AB
HIST1H2AM
HIST1H2AG
HIST1H2BD
HIST1H2BL
HIST1H2BN
HIST1H2BM
HIST1H2BB
HIST1H2BI
HIST1H2BC
HIST1H2BO
HIST1H2BJ
HIST1H3A
HIST1H3C
HIST1H3I
HIST1H3G
HIST1H3J
HIST1H3H
HIST1H3B
HIST1H4A
HIST1H4K
HIST1H4J
HIST1H4C
HIST1H4H
HIST1H4B
HIST1H4L
HIST1H4I
HARS
HARS2
HCN1
HFE
HIRIP3
HSPE1-MOB4
HLA-A
HLA-B
HLA-C
HLA-DMA
ANK3
HLA-DQA1
HLA-DQA2
HLA-DQB1
HLA-DRA
HLA-DRB1
HLA-F
HMGN4
PRMT1
HSPA1A
HSPA1B
HSPA1L
HSPA9
HSPD1
HSPE1
IER3
AP3B2
ABCC8
IK
IREB2
IRF3
ITIH1
ITIH3
ITIH4
ITPR3
JTB
KCNB1
KCNG2
KCNJ13
KCNN3
KLC1
KIFC1
LRP4
LTA
LY6H
ARHGAP1
MAD1L1
MAN2A1
MAP1A
MAPK3
MAPK7
MAPT
MDK
MFAP1
MFAP4
ARPC3
MICB
MMP16
MOG
MPHOSPH9
MPL
MSH5
MSRA
NAB2
NAGA
NDUFA2
NDUFA6
NEU1
NGEF
NGF
NMB
CNOT1
NOTCH4
NRGN
NRIP1
NRM
NSF
NT5C2
NUDT1
ATP2A2
OPCML
OR2H1
OR2H2
OR2J2
OR2J3
OR2W1
FURIN
ATP6V1G2
PBX2
PCBP2
PCCB
PCDH7
PCDHA1
PCDHA10
PCDHA11
PCDHA12
PCDHA13
PCDHA2
PCDHA3
PCDHA4
PCDHA5
PCDHA6
PCDHA7
PCDHA8
PCDHA9
PCDHAC1
CHMP1A
MRPS30
PDE4D
PHF1
PLCB2
PLCL1
PLCL2
B3GAT1
POU5F1
PPP1CC
PPP2R3A
PPP2R5B
PPP4C
PPT2
PRKD1
PRKD3
BAG5
ADGRB3
PRRG2
PRSS16
BAK1
PSMD6
PTGIS
TWF2
PTPRF
RAB13
RGL2
RANGAP1
RERE
TRIM27
LOC730159
C2orf47
C2orf82
TMEM110-MUSTN1
TMEM110
LRRC16A
LOC554223
DPCR1
C6orf25
C6orf10
FTSJ2
DFNA5
PPAPDC1B
WHSC1L1
C10orf32
C11orf31
PCNXL3
SETD8
FAM109B
