# Supplementary material for: A conditional gene-based association framework integrating isoform-level eQTL data reveals new susceptibility genes for schizophrenia
Source: eLife. 2022 Apr 12;11:e70779. doi: 10.7554/eLife.70779 (PMC9005191; doi:10.7554/eLife.70779)
Supplement: Figure 6—source data 2. [file elife-70779-fig6-data2.xlsx]

## Sheet: significant_gene_eDESE_dist
Significant genes identified by eDESE:dist
RGS6
PCGF3
SDCCAG8
BNIP3L
ST3GAL3
SLC32A1
SRPK2
BTN1A1
BTN2A1
NEK4
BTN3A3
TKT
SMG6-IT1
TRPC4
UCN
ZNF204P
RBMS3
BRINP2
CA8
CACNA1C
CACNA1I
POM121L2
CACNB2
CNOT7
IFT81
VPS29
VPS45
ZEB2
LRRC4
CCNB2
PPP1R16B
PAK6
SFXN5
TAOK2
SP7
ESAM
HCG11
CDK5R1
CENPL
RNF38
MPP6
ZNF365
RBFOX1
BANK1
SEC61A1
YPEL4
NDFIP2
GUSBP2
TBC1D5
NPAS3
CHRNA3
PLK2
ADAM22
SOX2-OT
SLC39A8
CLU
CMAHP
RWDD2A
CARMIL1
SATB2
ZNF804A
LINC00862
MUSTN1
CPNE7
SLCO6A1
MIGA2
ZNF491
B9D1
NCAN
GSX2
PLPP5
CTNND1
C3orf49
MAP7D1
FANCI
TBC1D15
FAM222A
CYP17A1
AMBRA1
SETD6
AGBL5
CYP2D8P
RFTN2
ZMAT2
TSNARE1
C2orf69
C1orf216
RCOR2
LINC00634
FAM178B
NAA11
DGKI
DGKZ
ZNF536
PLCH2
DENND4B
ARHGAP44
DLX1
ZSWIM6
DOC2A
HECW2
GATAD2A
LPCAT4
DPP4
DPYD
GPN3
DRD2
EXOC4
SCAF1
TSSK6
ADAL
EEF1A2
LINC00051
EFNA5
IGSF9B
SNORC
C12orf76
ERBB4
FHIT
RPL32P31
FOLH1
FOXP1
AKT3
GALNT2
MIR4688
MIR137HG
PFN1P11
RNA5SP272
RNA5SP366
LINC00502
MAPT-IT1
GPM6A
SERBP1P3
MARCKSL1P1
RN7SKP135
GRM3
HIST1H2BJ
HIST1H3D
RNU6-1001P
HCN1
MEF2C-AS1
BORCS7-ASMT
LINC01122
MYT1L-AS1
OVOL1-AS1
YWHAEP4
IQANK1
ABCB9
EP300-AS1
LINC01360
LINC01415
LINC01470
LINC01539
ACTG1P22
LINC01608
SNORA114
RPL12P47
LINC01648
HSPA9
LINC01672
LINC01929
FOXN2
LINC02033
LINC02050
CXXC5-AS1
LINC02326
LINC02551
ZKSCAN7-AS1
AP3B2
ABCC8
ITIH1
ITIH3
ITIH4
KCNG2
KCNJ13
KCNS1
KLC1
LRP1
MAD1L1
MAN2A2
MAP1A
ARL3
MCRS1
MFAP3
ARPC3
MSRA
NGF
NMB
NRAS
NRGN
NRIP1
NXPH4
ATP2A2
OPRD1
FURIN
PCCB
PCDH7
PDE4B
PDE4D
PLCL2
B3GAT1
PPIAP14
PRKG1
EIF2AK2
ADGRB3
