# Supplementary material for: A conditional gene-based association framework integrating isoform-level eQTL data reveals new susceptibility genes for schizophrenia
Source: eLife. 2022 Apr 12;11:e70779. doi: 10.7554/eLife.70779 (PMC9005191; doi:10.7554/eLife.70779)
Supplement: Figure 6—source data 3. [file elife-70779-fig6-data3.xlsx]

## Sheet: enrichment_results_gprofiler
Enrichment results of the common 105 genes identified by MAGMA and eDESE:dist.
source	term_name	term_id	adjusted_p_value	negative_log10_of_adjusted_p_value	term_size	query_size	intersection_size	effective_domain_size	intersections
GO:MF	voltage-gated cation channel activity	GO:0022843	0.00691734	2.16006	143	100	7	18679	KCNJ13,HCN1,CACNB2,ABCC8,CACNA1C,KCNG2,CACNA1I
GO:MF	cation channel activity	GO:0005261	0.00793532	2.10044	338	100	10	18679	KCNJ13,GPM6A,HCN1,CACNB2,ABCC8,CACNA1C,TRPC4,CHRNA3,KCNG2,CACNA1I
GO:MF	inorganic cation transmembrane transporter activity	GO:0022890	0.0476653	1.3218	596	100	12	18679	KCNJ13,GPM6A,HCN1,CACNB2,ABCC8,CACNA1C,ATP2A2,TRPC4,CHRNA3,KCNG2,SLC32A1,CACNA1I
GO:MF	voltage-gated calcium channel activity involved in AV node cell action potential	GO:0086056	0.0499001	1.3019	3	100	2	18679	CACNB2,CACNA1C
GO:BP	nervous system development	GO:0007399	0.00280403	2.55222	2484	99	32	18123	NGF,SDCCAG8,AKT3,ZEB2,DLX1,SATB2,ERBB4,GSX2,GPM6A,HCN1,ZSWIM6,EFNA5,ADGRB3,LRRC4,CLU,ZNF365,ABCC8,AMBRA1,CTNND1,DRD2,NRGN,IGSF9B,TRPC4,PAK6,MAP1A,CHRNA3,RBFOX1,TAOK2,DOC2A,ARHGAP44,ZNF536,SLC32A1
GO:BP	modulation of chemical synaptic transmission	GO:0050804	0.00741672	2.12979	434	99	12	18123	NGF,PLCL2,GRM3,LRRC4,DGKI,CACNB2,DGKZ,DRD2,NRGN,ATP2A2,MAP1A,CHRNA3
GO:BP	regulation of trans-synaptic signaling	GO:0099177	0.00759301	2.11959	435	99	12	18123	NGF,PLCL2,GRM3,LRRC4,DGKI,CACNB2,DGKZ,DRD2,NRGN,ATP2A2,MAP1A,CHRNA3
GO:BP	subpallium development	GO:0021544	0.0141125	1.85039	24	99	4	18123	DLX1,GSX2,ZSWIM6,DRD2
GO:BP	forebrain neuron differentiation	GO:0021879	0.0232034	1.63445	56	99	5	18123	DLX1,SATB2,ERBB4,GSX2,ZSWIM6
GO:BP	secretion	GO:0046903	0.0242346	1.61556	1492	99	22	18123	VPS45,ERBB4,ITIH3,ITIH4,PCDH7,EFNA5,DGKI,CLU,CACNB2,ABCC8,DRD2,CACNA1C,ATP2A2,TRPC4,CHRNA3,NMB,FURIN,DOC2A,ARHGAP44,KCNG2,SLC32A1,CACNA1I
GO:BP	signal release	GO:0023061	0.0251939	1.5987	490	99	12	18123	EFNA5,DGKI,CACNB2,ABCC8,DRD2,CACNA1C,ATP2A2,CHRNA3,NMB,DOC2A,KCNG2,SLC32A1
GO:BP	learning	GO:0007612	0.0275557	1.55979	147	99	7	18123	ADGRB3,DGKI,ABCC8,DRD2,NRGN,PAK6,MAP1A
GO:BP	signal release from synapse	GO:0099643	0.0372437	1.42895	154	99	7	18123	DGKI,CACNB2,DRD2,ATP2A2,CHRNA3,DOC2A,SLC32A1
GO:BP	neurotransmitter secretion	GO:0007269	0.0372437	1.42895	154	99	7	18123	DGKI,CACNB2,DRD2,ATP2A2,CHRNA3,DOC2A,SLC32A1
GO:BP	forebrain generation of neurons	GO:0021872	0.048264	1.31638	65	99	5	18123	DLX1,SATB2,ERBB4,GSX2,ZSWIM6
GO:CC	neuron projection	GO:0043005	1.60345e-05	4.79494	1384	102	25	18964	NGF,SDCCAG8,GPM6A,HCN1,GRM3,LRRC4,DGKI,CLU,CYP17A1,CTNND1,DRD2,NRGN,IGSF9B,CACNA1C,ARPC3,KLC1,MAP1A,CHRNA3,AP3B2,NMB,TAOK2,DOC2A,ARHGAP44,SLC32A1,CACNA1I
GO:CC	synapse	GO:0045202	4.12934e-05	4.38412	1348	102	24	18964	NGF,VPS45,ERBB4,GPM6A,ADGRB3,GRM3,LRRC4,DGKI,CLU,CACNB2,ABCC8,DGKZ,CTNND1,DRD2,NRGN,IGSF9B,CACNA1C,ATP2A2,MAP1A,CHRNA3,DOC2A,ARHGAP44,SLC32A1,EEF1A2
GO:CC	postsynaptic density	GO:0014069	8.20037e-05	4.08617	339	102	12	18964	ERBB4,GRM3,LRRC4,DGKI,DGKZ,CTNND1,DRD2,NRGN,IGSF9B,CACNA1C,CHRNA3,ARHGAP44
GO:CC	dendrite	GO:0030425	8.9836e-05	4.04655	641	102	16	18964	NGF,GPM6A,HCN1,GRM3,LRRC4,DGKI,CLU,CTNND1,DRD2,NRGN,CACNA1C,MAP1A,CHRNA3,TAOK2,ARHGAP44,SLC32A1
GO:CC	cell projection	GO:0042995	9.26445e-05	4.03318	2337	102	32	18964	NGF,SDCCAG8,NEK4,GPM6A,HCN1,GRM3,LRRC4,DGKI,CLU,RNF38,CYP17A1,DGKZ,AMBRA1,CTNND1,DRD2,NRGN,IGSF9B,CACNA1C,IFT81,ATP2A2,ARPC3,KLC1,MAP1A,CHRNA3,AP3B2,NMB,TAOK2,DOC2A,ARHGAP44,SLC32A1,PPP1R16B,CACNA1I
GO:CC	dendritic tree	GO:0097447	9.36612e-05	4.02844	643	102	16	18964	NGF,GPM6A,HCN1,GRM3,LRRC4,DGKI,CLU,CTNND1,DRD2,NRGN,CACNA1C,MAP1A,CHRNA3,TAOK2,ARHGAP44,SLC32A1
GO:CC	asymmetric synapse	GO:0032279	9.89119e-05	4.00475	345	102	12	18964	ERBB4,GRM3,LRRC4,DGKI,DGKZ,CTNND1,DRD2,NRGN,IGSF9B,CACNA1C,CHRNA3,ARHGAP44
GO:CC	cell junction	GO:0030054	0.000108099	3.96618	2107	102	30	18964	NGF,VPS45,SDCCAG8,ERBB4,GPM6A,HSPA9,ADGRB3,GRM3,LRRC4,DGKI,CLU,CACNB2,ABCC8,DGKZ,CTNND1,DRD2,NRGN,ESAM,IGSF9B,CACNA1C,ATP2A2,ARPC3,TRPC4,PAK6,MAP1A,CHRNA3,DOC2A,ARHGAP44,SLC32A1,EEF1A2
GO:CC	plasma membrane bounded cell projection	GO:0120025	0.000113668	3.94436	2234	102	31	18964	NGF,SDCCAG8,NEK4,GPM6A,HCN1,GRM3,LRRC4,DGKI,CLU,RNF38,CYP17A1,DGKZ,AMBRA1,CTNND1,DRD2,NRGN,IGSF9B,CACNA1C,IFT81,ATP2A2,ARPC3,KLC1,MAP1A,CHRNA3,AP3B2,NMB,TAOK2,DOC2A,ARHGAP44,SLC32A1,CACNA1I
GO:CC	postsynaptic specialization	GO:0099572	0.0001698	3.77006	363	102	12	18964	ERBB4,GRM3,LRRC4,DGKI,DGKZ,CTNND1,DRD2,NRGN,IGSF9B,CACNA1C,CHRNA3,ARHGAP44
GO:CC	neuron to neuron synapse	GO:0098984	0.000213754	3.67009	371	102	12	18964	ERBB4,GRM3,LRRC4,DGKI,DGKZ,CTNND1,DRD2,NRGN,IGSF9B,CACNA1C,CHRNA3,ARHGAP44
GO:CC	somatodendritic compartment	GO:0036477	0.000257622	3.58902	875	102	18	18964	NGF,GPM6A,HCN1,GRM3,LRRC4,DGKI,CLU,CYP17A1,CTNND1,DRD2,NRGN,CACNA1C,MAP1A,CHRNA3,TAOK2,ARHGAP44,SLC32A1,EEF1A2
GO:CC	axon	GO:0030424	0.000713395	3.14667	661	102	15	18964	NGF,GPM6A,HCN1,GRM3,DGKI,CYP17A1,CTNND1,DRD2,NRGN,ARPC3,KLC1,MAP1A,AP3B2,TAOK2,SLC32A1
GO:CC	presynapse	GO:0098793	0.00113283	2.94584	515	102	13	18964	NGF,VPS45,ERBB4,GPM6A,GRM3,DGKI,CACNB2,ABCC8,CTNND1,DRD2,DOC2A,ARHGAP44,SLC32A1
GO:CC	dendritic spine	GO:0043197	0.0021521	2.66714	186	102	8	18964	GPM6A,GRM3,LRRC4,DGKI,CTNND1,DRD2,NRGN,ARHGAP44
GO:CC	neuron spine	GO:0044309	0.00241979	2.61622	189	102	8	18964	GPM6A,GRM3,LRRC4,DGKI,CTNND1,DRD2,NRGN,ARHGAP44
GO:CC	postsynapse	GO:0098794	0.00246695	2.60784	641	102	14	18964	ERBB4,GPM6A,ADGRB3,GRM3,LRRC4,DGKI,DGKZ,CTNND1,DRD2,NRGN,IGSF9B,CACNA1C,CHRNA3,ARHGAP44
GO:CC	transmembrane transporter complex	GO:1902495	0.00294058	2.53157	325	102	10	18964	HCN1,PDE4D,CACNB2,ABCC8,CACNA1C,ATP2A2,TRPC4,CHRNA3,KCNG2,CACNA1I
GO:CC	transporter complex	GO:1990351	0.00434735	2.36178	340	102	10	18964	HCN1,PDE4D,CACNB2,ABCC8,CACNA1C,ATP2A2,TRPC4,CHRNA3,KCNG2,CACNA1I
GO:CC	glutamatergic synapse	GO:0098978	0.00614949	2.21116	354	102	10	18964	ERBB4,GPM6A,GRM3,LRRC4,DGKI,DGKZ,CTNND1,DRD2,NRGN,ARHGAP44
GO:CC	postsynaptic membrane	GO:0045211	0.00626484	2.20309	282	102	9	18964	ERBB4,GRM3,LRRC4,DGKI,DRD2,NRGN,IGSF9B,CACNA1C,CHRNA3
GO:CC	cation channel complex	GO:0034703	0.00909106	2.04139	227	102	8	18964	HCN1,PDE4D,CACNB2,ABCC8,CACNA1C,TRPC4,KCNG2,CACNA1I
GO:CC	ion channel complex	GO:0034702	0.0107168	1.96994	302	102	9	18964	HCN1,PDE4D,CACNB2,ABCC8,CACNA1C,TRPC4,CHRNA3,KCNG2,CACNA1I
GO:CC	calcium channel complex	GO:0034704	0.0117164	1.93121	71	102	5	18964	PDE4D,CACNB2,CACNA1C,TRPC4,CACNA1I
GO:CC	synaptic membrane	GO:0097060	0.0122679	1.91123	384	102	10	18964	ERBB4,GPM6A,GRM3,LRRC4,DGKI,DRD2,NRGN,IGSF9B,CACNA1C,CHRNA3
GO:CC	presynaptic active zone	GO:0048786	0.0173321	1.76115	77	102	5	18964	GPM6A,DGKI,CTNND1,ARHGAP44,SLC32A1
GO:CC	voltage-gated calcium channel complex	GO:0005891	0.0265396	1.57611	44	102	4	18964	PDE4D,CACNB2,CACNA1C,CACNA1I
GO:CC	synaptic vesicle	GO:0008021	0.0386296	1.41308	208	102	7	18964	NGF,VPS45,DGKI,ABCC8,DRD2,DOC2A,SLC32A1
KEGG	GnRH secretion	KEGG:04929	0.00363238	2.43981	64	50	5	8000	AKT3,HCN1,CACNA1C,TRPC4,CACNA1I
KEGG	MAPK signaling pathway	KEGG:04010	0.0342099	1.46585	294	50	8	8000	NGF,AKT3,ERBB4,EFNA5,CACNB2,CACNA1C,TAOK2,CACNA1I
REAC	Butyrophilin (BTN) family interactions	REAC:R-HSA-8851680	0.0123437	1.90855	12	59	3	10622	BTN3A3,BTN2A1,BTN1A1
REAC	Pre-NOTCH Processing in Golgi	REAC:R-HSA-1912420	0.0447104	1.34959	18	59	3	10622	ST3GAL3,ATP2A2,FURIN
WP	Nicotine Activity on Chromaffin Cells	WP:WP1603	0.027053	1.56779	4	47	2	7562	CACNA1C,CHRNA3
HPA	retina; inner plexiform layer[鈮edium]	HPA:0411242	0.0262786	1.5804	17	68	3	10877	HCN1,CHRNA3,SLC32A1
HPA	cerebellum; Purkinje cells - cytoplasm/membrane[High]	HPA:0090943	0.0318503	1.49689	191	68	7	10877	FHIT,CA8,CACNB2,DGKZ,ATP2A2,MAP1A,AP3B2
