# Supplementary material for: A conditional gene-based association framework integrating isoform-level eQTL data reveals new susceptibility genes for schizophrenia
Source: eLife. 2022 Apr 12;11:e70779. doi: 10.7554/eLife.70779 (PMC9005191; doi:10.7554/eLife.70779)
Supplement: Figure 7—source data 1. [file elife-70779-fig7-data1.xlsx]

## Sheet: gene_counts_eDESE_SPrediXcan
The count of potential susceptibility genes in each of the five optimized brain regions
Brain_Anterior_cingulate_cortex_BA24	eDESE:gene	168
Brain_Anterior_cingulate_cortex_BA24	S-PrediXcan	166
Brain_Anterior_cingulate_cortex_BA24	eDESE:isoform	223
Brain_Cerebellum	eDESE:gene	186
Brain_Cerebellum	S-PrediXcan	194
Brain_Cerebellum	eDESE:isoform	236
Brain_Frontal_Cortex_BA9	eDESE:gene	167
Brain_Frontal_Cortex_BA9	S-PrediXcan	189
Brain_Frontal_Cortex_BA9	eDESE:isoform	220
Brain_Hippocampus	eDESE:gene	143
Brain_Hippocampus	S-PrediXcan	167
Brain_Hippocampus	eDESE:isoform	222
Brain_Spinal_cord_cervical_c_1	eDESE:gene	135
Brain_Spinal_cord_cervical_c_1	S-PrediXcan	171
Brain_Spinal_cord_cervical_c_1	eDESE:isoform	209
