# Supplementary material for: A conditional gene-based association framework integrating isoform-level eQTL data reveals new susceptibility genes for schizophrenia
Source: eLife. 2022 Apr 12;11:e70779. doi: 10.7554/eLife.70779 (PMC9005191; doi:10.7554/eLife.70779)
Supplement: Figure 7—source data 2. [file elife-70779-fig7-data2.xlsx]

## Sheet: Combined_gene_list
The potential susceptibility genes identified by S-PrediXcan, eDESE:gene and eDESE:isoform in the five optimized brain regions
S-PrediXcan	eDESE:gene	eDESE:isoform
RLBP1	RGS6	RGS4
TRIM38	TRIM38	RGS6
RNF5	RORB	TRIM38
CNNM2	RPL29	RORB
RRAS	RPS17	RPA1
SDCCAG8	SATB1	RPL3
SEPT3	SEMA6C	RPS17
SF3B1	SF3B1	RTN3
ST3GAL3	SRSF4	SALL3
SKIV2L	SH3GL3	SATB1
SLC25A17	SKI	SBF1
BRD2	SLC12A6	ATXN2
SREBF2	SLC25A12	SCAND2P
STAG1	SLC6A9	BLM
BTN3A2	SOS2	SCTR
NEK4	SOX18	SDCCAG8
BTN3A3	SOX2	SRSF4
BTNL2	SRPK2	SGCD
BUB1B	ST13	SH3GL3
TBX6	BTN3A1	ST3GAL3
TGM5	STK11	SLBP
TKT	BTN3A2	SLC12A6
TM6SF2	BTN3A3	SLCO3A1
TP53BP1	STK31	BRAF
NSD3	TAT	SLC22A7
XRCC3	TCF20	SLC25A12
YWHAB	TEK	SLC27A4
SLC39A1	TFR2	SLC5A6
ZNF165	TGFBR2	SMARCA4
TRIM26	ACO2	SNRNP70
RNF112	TIMM10	SOS2
ZNF184	TKT	SOX2
ZSCAN26	TMOD2	SPTBN1
ZKSCAN8	TOP3A	SRP14
ZSCAN9	FMNL1	SRPK2
ZNF197	TRPS1	BTN1A1
ZNF281	TSFM	BTN2A1
ZNF35	ACRV1	STAT2
ZSCAN12	CCN6	BTN2A2
C4A	WNT2B	BTN3A1
C4B	ZBTB16	BTN3A2
FAM120A	RNF112	NEK4
FAM114A2	ZNF184	BTN3A3
PBX4	ZSCAN26	STK31
ARFGAP2	ZKSCAN8	BTRC
ZKSCAN3	ZSCAN9	SULT1A3
ZKSCAN4	YBEY	TACC1
CACNA1D	ZNF204P	TSPO
APOM	ZBTB18	TCF20
PRRC2A	ZNF277	TCF4
BAG6	ZNF93	TEAD4
ABHD16A	BTN2A3P	TESK1
CCHCR1	TMEM59L	TFR2
LY6G6C	CALN1	TGM2
MPIG6B	FAM13B	ACO2
SAPCD1	NIF3L1	TIMM10
VWA7	NAPSA	TKT
PRRT1	ROBO3	TMOD2
EGFL8	WDR7	GIGYF2
ZSCAN31	SCG3	TPBG
EHMT2	BRINP2	TPD52L2
ELAC2	CA8	TPM3
VPS29	CA9	ACP2
ELOVL1	ZSCAN12P1	TRPC4
VPS45	CACNA1C	TRPS1
DMTF1	CACNA1I	TSFM
LETM2	CACNA1S	TXNL1
PPP1R13B	TOB2P1	UBE2D3
SNAP91	CACNB2	UCP2
TLR9	ATP1A4	UNC13B
PPP1R16B	ZSCAN31	USP8
CUL9	ELAC2	VRK2
PAK6	CERS1	WASF1
MRM2	PCDH20	NSD3
EDEM3	MRPL14	CCN6
ACTR1B	ACTC1	WNT2B
TAOK2	MRTFA	ZBTB14
PUF60	SRR	ZNF184
VSIG2	MRPL22	ZSCAN26
NDUFA13	PCDHB18P	ZKSCAN8
PSORS1C1	VPS45	ZSCAN9
IP6K3	ACTR5	ZNF197
ABT1	CANX	ZNF204P
AS3MT	TMPRSS5	ZNF23
ALPK3	SNAP91	RHBDD3
C12orf10	KCNIP2	IKZF2
HCG11	CBX6	BCL11A
TNFRSF13C	UGGT2	BTN2A3P
NOSIP	PPP1R16B	RBMS3
ACYP2	ARFGEF2	ROBO3
NAT8	CTNNBL1	ARFGAP2
ARL6IP4	DBNDD2	FBXO11
ZNRF3	FGD3	FBXL17
MPP6	PTGES3	CA11
DDX56	PARD3	RGS19
RCBTB1	SFXN5	BRINP2
SELENOH	PARD6G	BCL2L12
YPEL3	FAM83D	SLC12A5
CENPM	LINC00266-1	CA8
ZDHHC5	ARHGAP40	NETO1
KMT2E	SIRPD	CABP1
L3MBTL2	STK35	ZSCAN12P1
COG8	SMYD5	RIPOR2
SUGP1	MRM2	CACNA1A
PCNX3	NMUR2	CACNA1C
LINC00240	UNC119B	CACNA1D
ZNF391	SYNPR	CDK2AP1
ZFP57	WDR17	CACNB2
STH	SORCS3	RTN4
CREB3L4	ACTR1A	UBAP2
ZBTB12	CHD5	ELAC2
C6orf48	RNF40	SMPD3
ALG12	SV2B	CERS1
PGBD1	CIB1	PCDH20
CHRNA2	SCGN	IFT81
CHRNA3	TP53TG1	VPS29
CHRNA5	MLXIP	BBX
LINC00320	VSIG2	PCDHB17P
TRAPPC3	LRRN3	VPS45
KIAA0391	ERI3	IMMP2L
MED8	SP7	ZEB2
SFMBT1	IFT57	TMPRSS5
RBM26	ABT1	PPP1R16A
APOPT1	ALPK3	SNX7
CLIC1	BFAR	SNX8
ZBED4	ACY1	SNX17
TUBB	PMFBP1	SNAP91
ZSCAN16	CRIP3	TLN2
ZSCAN2	TNFRSF13C	CACNA2D3
PITPNM2	DIRC3	DYNLRB1
MFSD4B	HAVCR1	KCNIP2
ZSCAN23	DUSP16	JAM3
LINC01556	NTM	CBX6
DNPH1	CEP83	LRRC4
SNX19	REEP2	UGGT2
NKAPL	PHF5A	PABPC1L
VARS2	ELOVL3	ARFGAP1
MUC21	NAT8	DHX35
CPEB1	HDAC10	CCNE1
COL11A2	VPS33A	TMEM74B
LINC00862	SIAE	SIRPB1
MUSTN1	ZNF365	SCRT2
KCTD13	PBK	SLC2A13
TMED4	YPEL3	CUL9
FEZF1	CENPM	NAV1
SPCS1	SFTA1P	STRC
CRHR1	NDFIP2	PTGES3
SLCO4C1	CPT1C	PARD3
RNASEH2C	PLA2G12A	PAK6
B9D1	CENPE	SFXN5
CILP2	DCP1A	PARD6G
CEBPZ	ZNF192P1	VSTM2L
GLYCTK	ZNF391	DNTTIP1
CCP110	GUSBP2	SLC19A3
KANSL1	TMEM9	TRIM33
EEFSEC	CGA	GALNT17
TTC14	TOX	MRM2
YJEFN3	TRIM50	CARD9
ANKRD45	STARD9	NMUR2
FAM83H	FRAS1	ADAP1
GMIP	CATSPERZ	UNC119B
GLT8D1	CHEK1	CD34
VPS37A	CUX2	WDR17
GSX2	KIF21A	TMEM189
PLPP5	SUGT1P1	CIZ1
SMDT1	PGBD4	ACTR1B
KLHL20	LRRTM2	COQ8A
CTNNA1	ZMYND10	CHD5
CTNND1	HS3ST5	CD47
BATF2	CHRM3	TSC22D1
CHADL	CHRM4	THEMIS2
NTN5	CHRNA2	IPO13
CCDC39	CHRNA3	HAX1
ANKRD44	CHRNA5	SCGN
ZNF664	SEPHS2	STAMBP
MAP7D1	CHST1	POSTN
DARS2	CCDC175	MORF4L1
MSL2	GALNT10	MLXIP
DNAJC11	CKB	LRRN3
TBC1D15	CKMT1B	MOB4
NT5DC2	TDRD9	ERI3
COQ10B	SOX2-OT	CDK11A
OGFOD2	CLCN3	NEGR1
WDR73	DCAF4	TAF5L
CYP17A1	VGLL2	PRPF8
WDR55	SFMBT1	TRNT1
AMBRA1	RASA3	ANAPC7
CYP21A2	G2E3	CHST12
TCTN1	PRICKLE2	DPF3
RBFA	L3HYPDH	SLC12A9
NAA16	SV2A	TBRG4
MAIP1	SERP2	PJA2
CYP2D6	DPYSL5	GMNN
ZMAT2	SNRPEP2	HOMER3
CCDC122	FANCL	C12orf10
PPM1M	TUBB3	PTBP2
CYP7B1	ZNF443	SEC11A
HARBI1	CMAHP	CRIP3
ZSCAN29	RNF122	TNFRSF13C
MAMSTR	PCGF6	LIN7B
TYW5	ZSCAN23	CYHR1
LACC1	ANKRD13A	CDKN2B
C1orf216	RNF146	CDKN2C
INO80E	FKBP1C	NTM
CXXC5	RWDD2A	CEP83
RFLNA	IFT74	REEP2
ACE	GALNT15	NISCH
DDAH2	SNX19	IL17RB
DDR1	NKAPL	ELOVL3
ASPHD1	AIG1	TUBGCP6
HCG22	CNTF	TAB1
XPNPEP3	TMEM243	ZNF365
UBLCP1	CCM2	RBFOX1
CRELD2	ZNF804A	BANK1
WBP2NL	FGD6	RAB21
SPATA2L	CPEB1	YPEL4
DGKZ	AGK	CENPM
SLC9C2	IFT22	NEIL1
C11orf49	KIAA1324L	ZDHHC8
NDUFAF7	LRGUK	NDFIP2
WDR82	MUSTN1	KMT2E
SPPL2C	COL9A1	SUN1
ZNF592	PSMG3-AS1	L3MBTL2
PLCH2	AMZ1	CETN3
LRRC37A	KCTD13	ZNF192P1
ATG13	KLF6	ZNF391
DDHD2	ALG8	SLC44A1
MAU2	SPAG16	CATSPER2
PRR12	KCTD10	TMEM9
PPP1R18	CPT1B	AP1S3
KMT5A	ZNF603P	TOX
APH1A	CRABP1	VRK3
CCDC92	FOXK1	TRIM46
MED19	CALHM1	FER1L5
DOC2A	ADO	RCC1
THOC7	GPR153	ZDHHC12
GNL3	ZNF322	TBC1D5
GATAD2A	MAMDC2	CMTM6
DPEP1	SNX30	SLC25A5P1
LPCAT4	TTC12	MMAB
PBRM1	ADIPOR2	CUX2
DPYD	SPTSSB	PPM1F
FAM216A	ARL17A	PGBD4
GPN3	CS	CHRM3
RPTOR	TMCC2	CHRM4
SCRIB	MALRD1	CHRNA2
SCAF1	DTX3	TNNI3K
TSSK6	PRR13	CHST1
EMB	CIB2	LINC00320
DNAJC19	LIMA1	MECR
SPIRE2	NCAN	ABHD12B
GATAD2B	RABGAP1L	CCDC175
SEZ6L2	TTC14	GALNT10
ZC3H7B	ZFP69	CKB
ZNF823	YJEFN3	CKMT1B
HCP5B	ANKRD45	ATG14
MYO18A	FAM83H	TNPO2
HCG17	EFCAB5	PAN2
HAPLN4	GPIHBP1	DDX55
LPAR2	CTDP1	ADAM22
AGER	SNHG11	TMEM179
CELSR3	SMDT1	CYB5R4
IGSF9B	MARS2	JKAMP
AGPAT1	SLC9B2	SOX2-OT
EID3	GLB1L3	DCAF4
EIF5	NSRP1	EVL
EP300	GOLGA2P5	TRPT1
C8orf86	FAHD2B	RBM26
HYKK	RPL23AP32	G2E3
FES	CTSK	S100A16
DNAH10OS	SVOP	L3HYPDH
BTBD18	CTSW	SETD3
SMIM4	ANO10	SERP2
FLOT1	INAVA	BDNF-AS
ANKRD63	TMEM40	CHD7
C5orf63	NT5DC2	IPO11
FUT2	ARMH3	SLC37A3
FUT9	FAM222A	TPH2
GALNT2	SPRYD3	ZDHHC18
GFI1	MED18	SCFD1
ALMS1	SIKE1	FANCL
MIR137HG	OGFOD3	ZFYVE21
FAM215B	STN1	PLEKHF1
PDIA3	GOLGA2P10	TUBB3
HIST1H1C	CYP2D6	ZSCAN16
HIST1H1B	CYP2D8P	THAP2
HIST1H2BD	ELOVL7	SLC39A8
HIST1H2BN	C22orf46	GTDC1
HIST1H2BE	C8orf48	CLU
HIST1H2BC	RFTN2	CMAHP
HIST1H2BO	CYP46A1	LINGO2
HIST1H4H	SNX32	DNPH1
HARS2	SATB2-AS1	UBR2
FTCDNL1	PPM1M	CGAS
FAM83H-AS1	CFAP43	RWDD2A
LINC01068	MAMSTR	RWDD3
HLA-C	C5orf64	ATG16L1
HLA-DMA	TYW5	DIABLO
HLA-DMB	SAP30L-AS1	GALNT15
ABCB9	TMEM192	SNX19
EBLN3P	DAND5	PPIL6
LINC01415	BRINP1	KIAA0319
LINC01470	CCDC96	NKAPL
MIR194-2HG	INO80E	SBDSP1
LINC01748	CXXC5	FSIP2
HSPE1	LYSMD3	TMEM243
FOXN2	ACE	CPEB1
LINC02033	PHETA2	CHCHD3
LINC02166	LINC00599	KIAA1324L
IER3	GOLGA6L4	NUDCD3
IK	ZNF800	KDM7A
IREB2	PARP3	AMZ1
IRF3	LINGO1-AS1	ADAMTS7
ITIH1	ASPHD1	KLF6
ITIH3	MIR9-3HG	C7orf50
KCNG2	KCTD21	GSTO2
KCNJ13	RCOR2	HSD17B14
KLC1	LINC01270	ZNF473
LY6H	LINC00634	CPT1B
MAP1A	XPNPEP3	HSD17B6
MAP3K11	ZFAND2A	ZNF603P
MAPK3	NDUFAF2	CRABP1
ARL3	BICDL1	SPCS1
MDK	GSDME	FOXK1
MICB	VPS26B	CALHM1
MLF2	TCHP	CPNE8
MMP16	HVCN1	WBP1L
MPHOSPH9	TMEM125	BORCS7
MPL	LRRIQ3	CRHR1
MSH5	PRR22	VPS13C
NAGA	CEP170P1	GPR153
NDUFA2	WBP2NL	RUSC2
NFKBIL1	ZNF684	ZNF322
NMB	DBNDD1	MAMDC2
CNOT1	CATSPERE	TTC12
NOTCH4	DGKI	CERCAM
NT5C2	DGKZ	TRMT61A
NUDT1	MEI1	ACTR6
NUP88	SLC9C2	APC2
OGDH	DHPS	SPTSSB
FURIN	C11orf49	ARL17A
PACSIN3	NDUFAF7	B9D1
PCCB	SPPL2C	CEND1
PCDHA1	EMC2	PHF21A
PCDHA10	ZBTB39	CISD2
PCDHA2	CCDC144CP	ATP13A1
PCDHA5	MFAP3L	LY6K
PCDHA6	ARHGAP44	GLYCTK
CHMP1A	IQCE	MALRD1
PLCB2	PRR12	PHRF1
PLCL1	ZNF644	BOLA3
PLCL2	ANKRD36B	DTX3
PMM1	DNAH10	INTS1
GIGYF1	KIF21B	KANSL1
POU5F1	KMT5A	DESI1
PPP1R11	THYN1	EEFSEC
PPP2R3A	CCDC92	REXO1
PTPA	DOLPP1	SIL1
PPP2R5B	PLPPR2	RABGAP1L
PPP4C	ACSBG1	FLAD1
PRRG2	ALMS1P1	CSRP1
PRSS16	MSTO1	TTC14
PTK6	NDUFA4L2	C3orf62
TWF2	THOC7	YJEFN3
RERE	C1orf43	ANKRD45
TRIM27	NUP210L	EFCAB5
RFXANK	GNL3	GLT8D1
RP1-86C11.7	PEX5L	GLT8D2
RP11-490G2.2	PBRM1	GPIHBP1
FAM109B	DPYD	TRMT2A
TMEM110	DRD2	ZBTB44
RP11-53O19.3	RUNDC3B	PRPF40B
AC012074.2	LRIF1	SNHG11
RP1-153G14.4	POLR3H	SMDT1
RP3-522J7.6	CSDC2	CTNNA1
RP11-350N15.5	RCCD1	SLC9B2
RP11-230C9.4	DNAJC19	GLB1L3
XXbac-BPG181B23.7	ZNF627	SAAL1
RP11-795F19.5	SSH1	CHADL
RP11-247A12.7	PPP1R21	DRC7
CTA-14H9.5	SPIRE2	RPL23AP32
RP1-265C24.8	CCDC62	DRC3
RP11-384F7.2	SGO2	SVOP
RP11-890B15.3	UQCR10	CTSW
RP11-569D9.5	ZER1	MAP7D1
DFNA5	C9orf129	CUL3
FCGRTHIST1H2BN	LPAR2	PRMT7
XXbac-BPG308K3.5	PLPPR5	SLC38A7
RP11-325F22.2	CKMT1A	FAM214A
AC078842.3	EFL1P1	TBC1D15
RP11-220I1.5	ACAN	PGAP1
	GOLGA8B	NT5DC2
	IGSF9B	C12orf43
	BDH2	NAA40
	LRRC37A2	FAM222A
	RPS4XP1	WDR73
	SCARNA5	NSUN2
	SNORA4	SYBU
	SNORA44	LINC01521
	SNORA60	PIH1D1
	WDR83	TCTN1
	ZNF774	SIKE1
	HAR1B	MFSD13A
	ELFN1	MAIP1
	AGT	FUZ
	C2CD4A	CYP2D7
	KHDC3L	CYP2D6
	ALG1L	MSANTD2
	EP300	ELOVL7
	SNORC	C22orf46
	C8orf86	CDHR3
	C12orf76	RFTN2
	ZNF833P	CYP46A1
	RPL21P44	SNX32
	UFSP1	FAAP20
	IGIP	TSNARE1
	ZNF826P	KCTD18
	APLNR	PPM1M
	STRCP1	CYP7B1
	PLEKHM3	TEKT5
	EPO	WDR81
	ERAL1	METTL15
	ERBB4	WDSUB1
	ZNF840P	C8orf31
	ERCC8	C5orf64
	C6orf226	TYW5
	FAM180B	C12orf65
	HSPD1P4	ZFP41
	INAFM2	BRINP1
	SYCE3	INO80E
	F2	FMC1
	UBTFL6	DCTN2
	RPL31P49	LINC02609
	RPS27P25	PHETA2
	FCGR1CP	DDB2
	AK4P1	NIPAL1
	FES	LINC00599
	DNAH10OS	GOLGA6L4
	ZNF732	CRTC2
	ZEB2-AS1	SPATA24
	FKBP2	PAXIP1-AS1
	BTBD18	TMEM218
	FKBP6	ASPHD1
	TEN1	LINC01270
	BORCS8	ADRA1A
	EIF3FP3	LINC00877
	FOXJ1	SEPSECS-AS1
	FPGT	ZNF707
	HNRNPA1P16	LINC00634
	AKT3	FAM221A
	HMGB3P24	ZMAT5
	PRSS56	XPNPEP3
	RBM26-AS1	ZFAND2A
	SMAD9-IT1	COX19
	ABCB1	CCDC189
	TRAF3IP2-AS1	NDUFAF2
	CACNA1C-AS1	GSDME
	FUT9	VPS26B
	ENO1-AS1	TCHP
	FYN	RHNO1
	KDM4A-AS1	FAM222A-AS1
	KMT2E-AS1	HVCN1
	EPN2-AS1	TMEM125
	DOCK4-AS1	LRRIQ3
	GALNT2	SNAI3-AS1
	FOXP1-IT1	CEP170P1
	SMIM2-IT1	NABP2
	PROB1	ZNF684
	SEC63P1	TSEN2
	SEPHS1P6	DBNDD1
	GFAP	CCDC107
	ALMS1	SLC35G2
	LINC00461	CATSPERE
	ZNF192P2	DGKI
	MIR137HG	DGKZ
	HDAC2-AS2	LYSMD2
	LINC00571	MEI1
	MAPT-AS1	ANKRD39
	KANSL1-AS1	DIS3L2
	MAPT-IT1	SLC9C2
	EIF3KP1	DHODH
	BCDIN3D-AS1	CCDC24
	RASAL2-AS1	SLC44A3
	THAP9-AS1	DHPS
	NAGPA-AS1	TMEM175
	LINC00640	C11orf49
	GPLD1	SLX1B
	SERBP1P3	DRAM2
	GPR27	CAMKV
	SLC39A12-AS1	NDUFAF7
	ABCB4	ZNF682
	MARCKSL1P1	EMC2
	NDUFA6-DT	ZNF592
	GRAP	DLG1
	GTF3C3	ZBTB39
	AMT	PPIP5K2
	RNU6-353P	DENND4B
	CSPG4P12	LRRC37A
	HCN1	CCDC144CP
	OSER1-DT	MFAP3L
	RBFADN	ATG13
	SNHG17	ARHGAP44
	CDIPTOSP	ADSL
	LINC00940	DDHD2
	FTCDNL1	EHBP1
	MEF2C-AS1	DLX2
	LINC01063	IQCE
	LINC01122	MINAR1
	CEBPZOS	CAMSAP2
	ADAMTS7P4	ZNFX1
	GOLGA2P7	CIP2A
	STAM-AS1	KIAA1755
	SAMMSON	DMXL2
	LINC01239	KIAA1841
	IFT74-AS1	KIF21B
	HMGN4	KMT5A
	SORD2P	GLDN
	LINC01301	KIFC2
	LINC01347	LARP1
	SNCA-AS1	CCDC92
	LINC01378	THEM6
	FOXG1-AS1	MESP2
	SATB1-AS1	DOC2A
	PKNOX2-AS1	HECW2
	LINC01470	THOC7
	ERVK9-11	GNL3
	MGAT3-AS1	CASTOR3
	MYL12BP1	SLC51A
	LINC01608	GATAD2A
	RPL10P19	PEX5L
	LINC01748	PPRC1
	LINC01793	LPCAT4
	GIHCG	POLR3G
	DNAJC4	POP4
	LINC01971	DPYD
	FOXN2	CRBN
	LINC01988	DIMT1
	LINC01990	RFT1
	LINC02067	DRD2
	LINC02224	PYCR2
	IDH2-DT	RUNDC3B
	LINC02289	WDR61
	LINC02552	SEC16B
	CFAP97D2	POLR3H
	LNCOC1	CSDC2
	CRIM1-DT	SCRIB
	SCN1A-AS1	VMO1
	UBE2D3-AS1	C1orf100
	IFNW1	RRP7BP
	AP4B1	METTL21A
	APAF1	HDDC3
	ABCC8	MARVELD3
	APLP2	STIMATE
	IMPDH1	ZNF627
	IREB2	PPTC7
	ITGB1	DNAJB13
	ITGB2	KNSTRN
	ITIH3	SGO2
	ITIH4	NT5DC3
	KCNB1	SEZ6L2
	KCNJ3	ITFG2
	KIF3C	ATP5MD
	KLHL3	ZNF823
	KLC1	ECM2
	KRT5	PLPPR5
	KTN1	GOLGA8B
	LDHC	LRRC55
	LRP4	IGSF9B
	LY6H	BDH2
	MAD1L1	EGR2
	MAFK	LRRC37A2
	MAPK3	LRTM2
	MAPK8IP1	INKA1
	MAPK8IP1P1	DENND6B
	MARK3	EIF3E
	ARL3	EIF3B
	MEA1	ZNF774
	MEF2C	ELAVL3
	OGA	ELFN1
	MLANA	PLIN5
	MMP16	AGT
	ARTN	EML1
	MTIF2	ENDOG
	NAGA	BCL2L15
	NCF2	NHLRC3
	NDST3	SNORC
	NDUFA6	C8orf86
	SERPINC1	C12orf76
	NHLH2	EPB41L3
	NMB	ZNF833P
	NMT1	ASPDH
	ATF4P4	APLNR
	CNOT1	EPHA7
	NSF	PLEKHM3
	NTSR1	FAM166B
	ATP2A2	ERBB4
	OPCML	ERCC8
	OPRD1	HEPN1
	OR2S1P	C6orf226
	PACSIN3	C12orf73
	PAH	EFCAB10
	PCCB	DNM1P41
	PCDH7	RPS2P46
	PCDHA13	RPS27P25
	PCDHB7	FCGR1CP
	PCDHGB2	RPL5P34
	PDE10A	FES
	PEX13	FEZ1
	PLCL2	FGA
	PMVK	FGD2
	POLG	AKAP13
	B3GAT1	DNAH10OS
	POU4F1	FKBP8
	PPP1CB	PRSS51
	PTPA	NPIPB11
	PPP3CA	NPIPB12
	PREB	AKAP6
	BAD	FOXJ1
	PRIM1	FOXM1
	EIF2AK2	FOXO3
	PRSS16	ABHD14A-ACY1
	PSD	FSCN3
	PTCH2	RBM26-AS1
	PTK2B	ABCB1
	PTK6	TRAF3IP2-AS1
	PTK7	SEC14L6
	PTP4A3	C5orf63
	PTP4A2P2	CACNA1C-AS2
	PURB	FUT9
	BCAS2	FXR1
	RAB27B	ALDH5A1
	RASGRF1	GABRD
	RBM7	MAGI2-AS3
		STIM2-AS1
		ALDH3B1
		GALNS
		GALNT2
		GBF1
		GDAP1L1
		GDF1
		SEPHS1P6
		GFAP
		GIT1
		GIT2
		MIR4500HG
		LINC00461
		MIR137HG
		BOLA3-AS1
		HDAC2-AS2
		MAFG-DT
		MAPT-AS1
		TMEM161B-AS1
		GNB1
		GNG2
		PARD6G-AS1
		GAS5-AS1
		FAHD2CP
		RASAL2-AS1
		NAGPA-AS1
		FAM227A
		GOLGA4
		GPD1
		SERBP1P3
		SLC39A12-AS1
		ADGRG1
		RPARP-AS1
		NDUFA6-DT
		GRIA1
		GRM3
		GTF2IP1
		HARS2
		CSPG4P12
		HCN1
		LINC00882
		OSER1-DT
		RBFADN
		SNHG17
		LINC00940
		FTCDNL1
		MIR124-2HG
		RBM5-AS1
		MEF2C-AS1
		VPS9D1-AS1
		ZSCAN16-AS1
		TTC41P
		LINC01122
		C2orf92
		ADAMTS7P4
		GOLGA2P7
		IQANK1
		ITGA9-AS1
		SMG1P2
		SMG1P5
		HMGN4
		ABCB9
		HNRNPA1
		LINC01289
		HIPK1-AS1
		LINC01351
		LINC01378
		SATB1-AS1
		ERVK9-11
		LINC01535
		ACTG1P17
		MYL12BP1
		PRR29-AS1
		CRYZL2P
		RPL10P19
		HSP90AA2P
		HSPD1
		LINC01877
		LINC01896
		LINC01971
		HTR3B
		ZNF710-AS1
		MRPS30-DT
		TEX52
		CFAP97D2
		IDH2
		CRIM1-DT
		AP2A2
		AP3B2
		ABCC8
		IMPDH1
		ITIH4
		JAK1
		JRK
		KCNB1
		KCNH3
		KCNK12
		KCNK4
		KCNN3
		KCNS3
		KHK
		KIF5A
		KLC1
		KRT4
		LCN2
		LIG4
		LLGL2
		VWA5A
		LRRFIP2
		LY6E
		LY6H
		LYN
		MAN2A2
		MANBA
		MAP4K1
		MAPK12
		MAPK8IP1
		MAPK8IP1P1
		MAPKAPK3
		MAPRE3
		MAPT
		MARK3
		MATN4
		MATR3
		MBD2
		MC1R
		ARL2
		MDK
		ARPC3
		MIP
		MITF
		MKRN1
		MLH1
		MMP16
		ASAH1
		MSR1
		MT1JP
		MVK
		MYO5C
		NAGA
		NAT1
		NCAM1
		NDST3
		NDUFA6
		NDUFS3
		NDUFS5
		ASTN1
		SERPINC1
		NEURL1
		NFATC1
		NFIX
		NFKB2
		NGEF
		ATF1
		ATF4P4
		NOS2P2
		NPTX1
		NR1H3
		NT5C2
		NUCB2
		NUDT1
		NUDT8
		OPCML
		OR7E14P
		ORC2
		OTOF
		PAH
		PCCB
		PCDH7
		PCDHA1
		PCDHA13
		PCDHA8
		PCDHGB4
		ALDH7A1
		PDE10A
		PER3
		PEX13
		PGM3
		PHF2
		PLCB2
		PLEC
		PLTP
		PLXNB2
		PMM1
		PNOC
		B3GALNT1
		POLI
		B3GAT1
		PPFIA3
		PPIL2
		PPP1CC
		PTPA
		PPP4C
		PRC1
		PRDX5
		SLC26A5
		PRKACB
		PRKCD
		PRKD3
		ADGRB1
		EIF2AK2
		PRPSAP2
		PRSS16
		BAP1
		PSD
		PSMD6
		PTK6
		TWF2
		PTN
		SIRPA
		PTPRS
		BCAS2
		RAB27B
		RANGAP1
		RARB
		RASGRF1
		RBM6
		REG1A
		UPF1
		RERE
		RFXANK
