# Supplementary material for: A conditional gene-based association framework integrating isoform-level eQTL data reveals new susceptibility genes for schizophrenia
Source: eLife. 2022 Apr 12;11:e70779. doi: 10.7554/eLife.70779 (PMC9005191; doi:10.7554/eLife.70779)
Supplement: Figure 8—source data 1. [file elife-70779-fig8-data1.xlsx]

## Sheet: gene_in_consensus_module
Genes in the consensus module (colored “turquoise”)
ENSG ID
ENSG00000228463
ENSG00000228794
ENSG00000230699
ENSG00000188976
ENSG00000217801
ENSG00000186891
ENSG00000176022
ENSG00000107404
ENSG00000205090
ENSG00000160075
ENSG00000215014
ENSG00000228594
ENSG00000272106
ENSG00000189339
ENSG00000215914
ENSG00000227775
ENSG00000078369
ENSG00000169885
ENSG00000233542
ENSG00000187730
ENSG00000067606
ENSG00000157933
ENSG00000116151
ENSG00000272420
ENSG00000157881
ENSG00000197921
ENSG00000157870
ENSG00000142606
ENSG00000158109
ENSG00000130764
ENSG00000169598
ENSG00000198912
ENSG00000196581
ENSG00000131697
ENSG00000069424
ENSG00000116254
ENSG00000158286
ENSG00000116237
ENSG00000158292
ENSG00000097021
ENSG00000187017
ENSG00000215788
ENSG00000171680
ENSG00000162408
ENSG00000116273
ENSG00000007923
ENSG00000171735
ENSG00000162426
ENSG00000188807
ENSG00000171603
ENSG00000162441
ENSG00000130939
ENSG00000175279
ENSG00000241563
ENSG00000142655
ENSG00000198793
ENSG00000171819
ENSG00000120942
ENSG00000204624
ENSG00000116661
ENSG00000132879
ENSG00000162490
ENSG00000177000
ENSG00000011021
ENSG00000242349
ENSG00000175206
ENSG00000120937
ENSG00000162494
ENSG00000116731
ENSG00000189337
ENSG00000142634
ENSG00000116138
ENSG00000116771
ENSG00000197312
ENSG00000116786
ENSG00000233954
ENSG00000186510
ENSG00000237276
ENSG00000132881
ENSG00000037637
ENSG00000226029
ENSG00000233421
ENSG00000236698
ENSG00000186715
ENSG00000228549
ENSG00000159363
ENSG00000272084
ENSG00000158747
ENSG00000169914
ENSG00000162545
ENSG00000090432
ENSG00000183114
ENSG00000117245
ENSG00000189410
ENSG00000075151
ENSG00000227001
ENSG00000187952
ENSG00000076864
ENSG00000090686
ENSG00000218510
ENSG00000162552
ENSG00000070886
ENSG00000133216
ENSG00000004487
ENSG00000169641
ENSG00000179546
ENSG00000125944
ENSG00000125945
ENSG00000117308
ENSG00000179163
ENSG00000001460
ENSG00000117602
ENSG00000117616
ENSG00000272432
ENSG00000224183
ENSG00000204178
ENSG00000117643
ENSG00000228172
ENSG00000117640
ENSG00000127423
ENSG00000182749
ENSG00000117632
ENSG00000158008
ENSG00000175087
ENSG00000117682
ENSG00000225891
ENSG00000260063
ENSG00000204160
ENSG00000175793
ENSG00000142751
ENSG00000253368
ENSG00000090020
ENSG00000142784
ENSG00000243659
ENSG00000181773
ENSG00000126709
ENSG00000225886
ENSG00000130768
ENSG00000130766
ENSG00000130772
ENSG00000279443
ENSG00000198492
ENSG00000116329
ENSG00000159023
ENSG00000253304
ENSG00000060656
ENSG00000223382
ENSG00000121769
ENSG00000121764
ENSG00000121753
ENSG00000025800
ENSG00000224066
ENSG00000160051
ENSG00000160058
ENSG00000160062
ENSG00000162521
ENSG00000162522
ENSG00000134684
ENSG00000160097
ENSG00000121905
ENSG00000116514
ENSG00000278966
ENSG00000121904
ENSG00000163866
ENSG00000189280
ENSG00000188910
ENSG00000116544
ENSG00000146463
ENSG00000142687
ENSG00000020129
ENSG00000239636
ENSG00000126067
ENSG00000142686
ENSG00000116871
ENSG00000214193
ENSG00000116883
ENSG00000116885
ENSG00000163873
ENSG00000116922
ENSG00000183317
ENSG00000185090
ENSG00000196449
ENSG00000185668
ENSG00000224592
ENSG00000116954
ENSG00000174574
ENSG00000237624
ENSG00000116981
ENSG00000116983
ENSG00000116990
ENSG00000131236
ENSG00000259943
ENSG00000084070
ENSG00000187801
ENSG00000260920
ENSG00000279667
ENSG00000187815
ENSG00000238287
ENSG00000164002
ENSG00000117016
ENSG00000066136
ENSG00000117013
ENSG00000171793
ENSG00000010803
ENSG00000204060
ENSG00000127124
ENSG00000198815
ENSG00000177181
ENSG00000234917
ENSG00000228452
ENSG00000117395
ENSG00000117400
ENSG00000229431
ENSG00000236200
ENSG00000126091
ENSG00000132768
ENSG00000159214
ENSG00000178028
ENSG00000142945
ENSG00000142959
ENSG00000117425
ENSG00000070785
ENSG00000126107
ENSG00000197429
ENSG00000086015
ENSG00000117461
ENSG00000171357
ENSG00000085999
ENSG00000117481
ENSG00000269956
ENSG00000123472
ENSG00000186118
ENSG00000187048
ENSG00000186377
ENSG00000186160
ENSG00000123473
ENSG00000186790
ENSG00000269113
ENSG00000117834
ENSG00000186094
ENSG00000162373
ENSG00000162374
ENSG00000203356
ENSG00000123091
ENSG00000085831
ENSG00000085832
ENSG00000078618
ENSG00000169213
ENSG00000198841
ENSG00000157077
ENSG00000224680
ENSG00000162377
ENSG00000162378
ENSG00000157193
ENSG00000174332
ENSG00000058804
ENSG00000116209
ENSG00000157216
ENSG00000243725
ENSG00000162396
ENSG00000116133
ENSG00000143001
ENSG00000162409
ENSG00000173406
ENSG00000177606
ENSG00000272226
ENSG00000134709
ENSG00000132849
ENSG00000203965
ENSG00000162434
ENSG00000116675
ENSG00000118473
ENSG00000152760
ENSG00000142864
ENSG00000162595
ENSG00000033122
ENSG00000132485
ENSG00000172260
ENSG00000254685
ENSG00000116783
ENSG00000178965
ENSG00000162623
ENSG00000137968
ENSG00000057468
ENSG00000226415
ENSG00000117069
ENSG00000154027
ENSG00000180488
ENSG00000219201
ENSG00000235927
ENSG00000162614
ENSG00000162616
ENSG00000137960
ENSG00000122420
ENSG00000117114
ENSG00000142875
ENSG00000203943
ENSG00000137976
ENSG00000117133
ENSG00000117155
ENSG00000162642
ENSG00000171502
ENSG00000122417
ENSG00000261737
ENSG00000267272
ENSG00000143013
ENSG00000234518
ENSG00000197147
ENSG00000272931
ENSG00000228175
ENSG00000172031
ENSG00000230667
ENSG00000284413
ENSG00000069712
ENSG00000174842
ENSG00000122484
ENSG00000154511
ENSG00000117505
ENSG00000229635
ENSG00000137942
ENSG00000260464
ENSG00000067334
ENSG00000152078
ENSG00000117598
ENSG00000117600
ENSG00000156875
ENSG00000122477
ENSG00000137992
ENSG00000137996
ENSG00000181656
ENSG00000162694
ENSG00000183298
ENSG00000118733
ENSG00000198890
ENSG00000162631
ENSG00000224550
ENSG00000134215
ENSG00000085491
ENSG00000280186
ENSG00000162636
ENSG00000162639
ENSG00000121940
ENSG00000085433
ENSG00000116299
ENSG00000031698
ENSG00000143126
ENSG00000162650
ENSG00000174151
ENSG00000181754
ENSG00000156097
ENSG00000116337
ENSG00000228703
ENSG00000168765
ENSG00000134202
ENSG00000143093
ENSG00000197106
ENSG00000224965
ENSG00000116396
ENSG00000227963
ENSG00000143125
ENSG00000177301
ENSG00000259834
ENSG00000177272
ENSG00000232811
ENSG00000121931
ENSG00000260948
ENSG00000233337
ENSG00000243960
ENSG00000116455
ENSG00000197852
ENSG00000064703
ENSG00000171385
ENSG00000231437
ENSG00000143079
ENSG00000134245
ENSG00000155367
ENSG00000184599
ENSG00000224167
ENSG00000081026
ENSG00000232499
ENSG00000116793
ENSG00000232450
ENSG00000134262
ENSG00000118655
ENSG00000134207
ENSG00000009307
ENSG00000134198
ENSG00000134259
ENSG00000177551
ENSG00000228127
ENSG00000163399
ENSG00000143061
ENSG00000134256
ENSG00000271427
ENSG00000198162
ENSG00000279513
ENSG00000196505
ENSG00000065183
ENSG00000260941
ENSG00000143067
ENSG00000265808
ENSG00000274642
ENSG00000281741
ENSG00000213244
ENSG00000188610
ENSG00000171943
ENSG00000227082
ENSG00000272583
ENSG00000231752
ENSG00000277702
ENSG00000232527
ENSG00000266338
ENSG00000196369
ENSG00000215784
ENSG00000272419
ENSG00000281571
ENSG00000223612
ENSG00000162825
ENSG00000174827
ENSG00000186141
ENSG00000131779
ENSG00000211451
ENSG00000265241
ENSG00000272031
ENSG00000233396
ENSG00000277406
ENSG00000277420
ENSG00000237188
ENSG00000116128
ENSG00000229828
ENSG00000198658
ENSG00000227733
ENSG00000272824
ENSG00000178104
ENSG00000215861
ENSG00000159164
ENSG00000136631
ENSG00000159208
ENSG00000163125
ENSG00000143374
ENSG00000143369
ENSG00000228126
ENSG00000143457
ENSG00000143363
ENSG00000213190
ENSG00000143434
ENSG00000163155
ENSG00000143367
ENSG00000143376
ENSG00000159409
ENSG00000178796
ENSG00000269621
ENSG00000143436
ENSG00000143450
ENSG00000249602
ENSG00000182134
ENSG00000203288
ENSG00000234614
ENSG00000196407
ENSG00000159445
ENSG00000143631
ENSG00000143614
ENSG00000198837
ENSG00000282386
ENSG00000273026
ENSG00000272654
ENSG00000143549
ENSG00000143569
ENSG00000160714
ENSG00000160716
ENSG00000232093
ENSG00000143590
ENSG00000236263
ENSG00000160766
ENSG00000236675
ENSG00000177628
ENSG00000160767
ENSG00000143630
ENSG00000143627
ENSG00000160752
ENSG00000160753
ENSG00000235919
ENSG00000246203
ENSG00000132718
ENSG00000160803
ENSG00000196189
ENSG00000160785
ENSG00000198715
ENSG00000163468
ENSG00000116604
ENSG00000160818
ENSG00000272971
ENSG00000229953
ENSG00000143320
ENSG00000223356
ENSG00000143294
ENSG00000198400
ENSG00000132694
ENSG00000183853
ENSG00000162706
ENSG00000085552
ENSG00000143315
ENSG00000162728
ENSG00000143318
ENSG00000227741
ENSG00000122218
ENSG00000171786
ENSG00000215845
ENSG00000158773
ENSG00000162755
ENSG00000158793
ENSG00000158850
ENSG00000158864
ENSG00000158882
ENSG00000143257
ENSG00000248485
ENSG00000283696
ENSG00000283317
ENSG00000162746
ENSG00000081721
ENSG00000118217
ENSG00000198929
ENSG00000152332
ENSG00000117152
ENSG00000185630
ENSG00000143171
ENSG00000143179
ENSG00000236364
ENSG00000188859
ENSG00000143195
ENSG00000143194
ENSG00000198821
ENSG00000143164
ENSG00000143147
ENSG00000143155
ENSG00000143184
ENSG00000143196
ENSG00000143153
ENSG00000143156
ENSG00000117475
ENSG00000117477
ENSG00000117479
ENSG00000213062
ENSG00000000457
ENSG00000075945
ENSG00000117533
ENSG00000010165
ENSG00000197959
ENSG00000135845
ENSG00000120337
ENSG00000183831
ENSG00000117593
ENSG00000270084
ENSG00000152061
ENSG00000116161
ENSG00000143207
ENSG00000152092
ENSG00000120341
ENSG00000224687
ENSG00000075391
ENSG00000213057
ENSG00000273384
ENSG00000116191
ENSG00000116199
ENSG00000143322
ENSG00000162782
ENSG00000143340
ENSG00000116260
ENSG00000230124
ENSG00000143324
ENSG00000135823
ENSG00000162783
ENSG00000198216
ENSG00000272880
ENSG00000143333
ENSG00000135824
ENSG00000135829
ENSG00000058085
ENSG00000157064
ENSG00000121481
ENSG00000273004
ENSG00000116703
ENSG00000228238
ENSG00000162670
ENSG00000237457
ENSG00000116741
ENSG00000134371
ENSG00000162630
ENSG00000177888
ENSG00000213047
ENSG00000162702
ENSG00000118200
ENSG00000116852
ENSG00000229191
ENSG00000232237
ENSG00000116857
ENSG00000231871
ENSG00000198700
ENSG00000163435
ENSG00000077152
ENSG00000232626
ENSG00000143858
ENSG00000117139
ENSG00000214796
ENSG00000234996
ENSG00000183155
ENSG00000117153
ENSG00000159348
ENSG00000163444
ENSG00000143847
ENSG00000122180
ENSG00000133063
ENSG00000231507
ENSG00000159388
ENSG00000058668
ENSG00000170498
ENSG00000174567
ENSG00000143850
ENSG00000170382
ENSG00000117222
ENSG00000133069
ENSG00000162873
ENSG00000186007
ENSG00000281406
ENSG00000174514
ENSG00000196550
ENSG00000162896
ENSG00000275392
ENSG00000196352
ENSG00000284237
ENSG00000076356
ENSG00000008118
ENSG00000196878
ENSG00000227591
ENSG00000162757
ENSG00000117597
ENSG00000143469
ENSG00000203706
ENSG00000082497
ENSG00000143473
ENSG00000234233
ENSG00000082512
ENSG00000123684
ENSG00000233626
ENSG00000143493
ENSG00000143476
ENSG00000203705
ENSG00000198468
ENSG00000143494
ENSG00000136643
ENSG00000143499
ENSG00000117724
ENSG00000250536
ENSG00000082482
ENSG00000196482
ENSG00000067533
ENSG00000136628
ENSG00000162813
ENSG00000067704
ENSG00000218283
ENSG00000116141
ENSG00000162817
ENSG00000143507
ENSG00000154305
ENSG00000186063
ENSG00000143502
ENSG00000185495
ENSG00000143756
ENSG00000143753
ENSG00000143786
ENSG00000243709
ENSG00000182827
ENSG00000185155
ENSG00000183814
ENSG00000203685
ENSG00000143801
ENSG00000163050
ENSG00000143740
ENSG00000143816
ENSG00000143761
ENSG00000203684
ENSG00000162913
ENSG00000154358
ENSG00000269890
ENSG00000269934
ENSG00000162931
ENSG00000181218
ENSG00000196890
ENSG00000279306
ENSG00000168159
ENSG00000168118
ENSG00000154429
ENSG00000135763
ENSG00000177614
ENSG00000173409
ENSG00000119283
ENSG00000116903
ENSG00000135766
ENSG00000116918
ENSG00000116991
ENSG00000212916
ENSG00000135778
ENSG00000135749
ENSG00000143674
ENSG00000135750
ENSG00000183780
ENSG00000273367
ENSG00000168275
ENSG00000224939
ENSG00000273416
ENSG00000173726
ENSG00000230026
ENSG00000116957
ENSG00000162885
ENSG00000168243
ENSG00000116977
ENSG00000077522
ENSG00000198626
ENSG00000180875
ENSG00000182901
ENSG00000225554
ENSG00000054277
ENSG00000203668
ENSG00000174371
ENSG00000180287
ENSG00000224525
ENSG00000117020
ENSG00000226828
ENSG00000179456
ENSG00000173728
ENSG00000035687
ENSG00000121644
ENSG00000273175
ENSG00000185420
ENSG00000162851
ENSG00000162852
ENSG00000260698
ENSG00000260855
ENSG00000277462
ENSG00000215795
ENSG00000162722
ENSG00000226191
ENSG00000196071
ENSG00000175137
ENSG00000185220
ENSG00000184731
ENSG00000035115
ENSG00000189292
ENSG00000151353
ENSG00000172554
ENSG00000115705
ENSG00000186487
ENSG00000225234
ENSG00000271868
ENSG00000171865
ENSG00000151360
ENSG00000176887
ENSG00000205837
ENSG00000225964
ENSG00000134326
ENSG00000271947
ENSG00000228203
ENSG00000229727
ENSG00000115738
ENSG00000119185
ENSG00000243491
ENSG00000115750
ENSG00000269973
ENSG00000134317
ENSG00000172059
ENSG00000115756
ENSG00000143870
ENSG00000271952
ENSG00000162975
ENSG00000145063
ENSG00000150873
ENSG00000134318
ENSG00000162981
ENSG00000151779
ENSG00000233718
ENSG00000197872
ENSG00000163032
ENSG00000170745
ENSG00000260331
ENSG00000240857
ENSG00000115884
ENSG00000055917
ENSG00000279307
ENSG00000118961
ENSG00000119771
ENSG00000205639
ENSG00000163026
ENSG00000119782
ENSG00000232642
ENSG00000186453
ENSG00000223754
ENSG00000084676
ENSG00000138092
ENSG00000115137
ENSG00000084710
ENSG00000115138
ENSG00000119772
ENSG00000235072
ENSG00000138101
ENSG00000143970
ENSG00000217643
ENSG00000084731
ENSG00000138018
ENSG00000115155
ENSG00000171303
ENSG00000157851
ENSG00000084764
ENSG00000272056
ENSG00000229122
ENSG00000272148
ENSG00000138030
ENSG00000138028
ENSG00000115194
ENSG00000138100
ENSG00000115204
ENSG00000115207
ENSG00000115216
ENSG00000115226
ENSG00000084734
ENSG00000221843
ENSG00000243943
ENSG00000119760
ENSG00000163798
ENSG00000205334
ENSG00000171103
ENSG00000171094
ENSG00000213626
ENSG00000172954
ENSG00000158089
ENSG00000214711
ENSG00000013016
ENSG00000162959
ENSG00000021574
ENSG00000119812
ENSG00000260025
ENSG00000205221
ENSG00000279519
ENSG00000152133
ENSG00000218739
ENSG00000115816
ENSG00000003509
ENSG00000115828
ENSG00000163171
ENSG00000115841
ENSG00000119787
ENSG00000152147
ENSG00000163214
ENSG00000223922
ENSG00000214694
ENSG00000269210
ENSG00000205111
ENSG00000231312
ENSG00000152154
ENSG00000183023
ENSG00000162878
ENSG00000057935
ENSG00000138036
ENSG00000138075
ENSG00000143921
ENSG00000138095
ENSG00000138032
ENSG00000138078
ENSG00000143919
ENSG00000138083
ENSG00000171132
ENSG00000250565
ENSG00000279254
ENSG00000171150
ENSG00000260977
ENSG00000239332
ENSG00000180398
ENSG00000119888
ENSG00000095002
ENSG00000184261
ENSG00000162869
ENSG00000179915
ENSG00000068912
ENSG00000178021
ENSG00000214595
ENSG00000115310
ENSG00000227799
ENSG00000085760
ENSG00000233251
ENSG00000055813
ENSG00000115392
ENSG00000233723
ENSG00000119866
ENSG00000162929
ENSG00000237651
ENSG00000271889
ENSG00000170340
ENSG00000186889
ENSG00000115504
ENSG00000143951
ENSG00000014641
ENSG00000169764
ENSG00000197329
ENSG00000119862
ENSG00000260101
ENSG00000198369
ENSG00000197223
ENSG00000243667
ENSG00000115946
ENSG00000221823
ENSG00000198380
ENSG00000115977
ENSG00000116005
ENSG00000035141
ENSG00000075340
ENSG00000124357
ENSG00000124383
ENSG00000003137
ENSG00000135631
ENSG00000135632
ENSG00000163013
ENSG00000135625
ENSG00000114956
ENSG00000257800
ENSG00000225439
ENSG00000204843
ENSG00000237737
ENSG00000005448
ENSG00000115274
ENSG00000204822
ENSG00000115289
ENSG00000144045
ENSG00000115317
ENSG00000135622
ENSG00000204792
ENSG00000236209
ENSG00000176204
ENSG00000066032
ENSG00000162951
ENSG00000186854
ENSG00000034510
ENSG00000176407
ENSG00000115525
ENSG00000208772
ENSG00000132305
ENSG00000132313
ENSG00000068615
ENSG00000115561
ENSG00000153561
ENSG00000153563
ENSG00000172116
ENSG00000204745
ENSG00000222041
ENSG00000234231
ENSG00000172071
ENSG00000230006
ENSG00000283196
ENSG00000261600
ENSG00000143429
ENSG00000275111
ENSG00000115041
ENSG00000272913
ENSG00000229689
ENSG00000273305
ENSG00000168992
ENSG00000174501
ENSG00000186281
ENSG00000274286
ENSG00000158050
ENSG00000204685
ENSG00000135956
ENSG00000158158
ENSG00000213337
ENSG00000279791
ENSG00000230606
ENSG00000115073
ENSG00000075568
ENSG00000040933
ENSG00000115446
ENSG00000196872
ENSG00000231822
ENSG00000273045
ENSG00000241962
ENSG00000135945
ENSG00000144218
ENSG00000230393
ENSG00000170500
ENSG00000115526
ENSG00000115539
ENSG00000170485
ENSG00000223947
ENSG00000204634
ENSG00000272902
ENSG00000175874
ENSG00000196460
ENSG00000115598
ENSG00000115616
ENSG00000170417
ENSG00000279904
ENSG00000269707
ENSG00000224509
ENSG00000135972
ENSG00000135973
ENSG00000135966
ENSG00000235319
ENSG00000115641
ENSG00000071051
ENSG00000115652
ENSG00000135968
ENSG00000204588
ENSG00000175772
ENSG00000169679
ENSG00000172965
ENSG00000153107
ENSG00000144152
ENSG00000278962
ENSG00000144161
ENSG00000169629
ENSG00000114999
ENSG00000237753
ENSG00000144136
ENSG00000189223
ENSG00000125618
ENSG00000136682
ENSG00000184492
ENSG00000240356
ENSG00000228857
ENSG00000115091
ENSG00000175497
ENSG00000235026
ENSG00000088205
ENSG00000279227
ENSG00000125629
ENSG00000229867
ENSG00000144120
ENSG00000088179
ENSG00000144118
ENSG00000074054
ENSG00000155052
ENSG00000260634
ENSG00000260163
ENSG00000163161
ENSG00000236682
ENSG00000115718
ENSG00000144231
ENSG00000144233
ENSG00000136715
ENSG00000136720
ENSG00000222014
ENSG00000227632
ENSG00000213225
ENSG00000136718
ENSG00000136698
ENSG00000240253
ENSG00000178171
ENSG00000136002
ENSG00000152102
ENSG00000115762
ENSG00000233087
ENSG00000273073
ENSG00000075886
ENSG00000197927
ENSG00000213222
ENSG00000163046
ENSG00000272769
ENSG00000230992
ENSG00000152127
ENSG00000152128
ENSG00000115839
ENSG00000121988
ENSG00000048991
ENSG00000076003
ENSG00000144229
ENSG00000144227
ENSG00000135999
ENSG00000168280
ENSG00000150556
ENSG00000187123
ENSG00000183091
ENSG00000162980
ENSG00000182389
ENSG00000177519
ENSG00000144278
ENSG00000230251
ENSG00000162989
ENSG00000153234
ENSG00000123612
ENSG00000007001
ENSG00000270557
ENSG00000153237
ENSG00000163331
ENSG00000196151
ENSG00000153246
ENSG00000232320
ENSG00000144290
ENSG00000115290
ENSG00000153253
ENSG00000136531
ENSG00000178662
ENSG00000123607
ENSG00000144285
ENSG00000169432
ENSG00000136546
ENSG00000172318
ENSG00000198648
ENSG00000172292
ENSG00000138399
ENSG00000138398
ENSG00000213160
ENSG00000138385
ENSG00000213981
ENSG00000204335
ENSG00000234350
ENSG00000239467
ENSG00000204334
ENSG00000128683
ENSG00000115806
ENSG00000198586
ENSG00000115827
ENSG00000115840
ENSG00000228016
ENSG00000091428
ENSG00000138430
ENSG00000144306
ENSG00000163328
ENSG00000128656
ENSG00000144320
ENSG00000170144
ENSG00000079156
ENSG00000238082
ENSG00000237298
ENSG00000144331
ENSG00000188452
ENSG00000150722
ENSG00000115252
ENSG00000061676
ENSG00000162999
ENSG00000163002
ENSG00000272800
ENSG00000177855
ENSG00000283839
ENSG00000170396
ENSG00000226747
ENSG00000144369
ENSG00000144366
ENSG00000204262
ENSG00000138381
ENSG00000273240
ENSG00000253559
ENSG00000151690
ENSG00000189362
ENSG00000138386
ENSG00000115419
ENSG00000115415
ENSG00000138378
ENSG00000144339
ENSG00000196950
ENSG00000081320
ENSG00000119041
ENSG00000187944
ENSG00000197121
ENSG00000144381
ENSG00000115540
ENSG00000119042
ENSG00000213938
ENSG00000178074
ENSG00000138356
ENSG00000196290
ENSG00000155744
ENSG00000155754
ENSG00000082126
ENSG00000003393
ENSG00000055044
ENSG00000138439
ENSG00000138442
ENSG00000138443
ENSG00000023228
ENSG00000204186
ENSG00000114948
ENSG00000118246
ENSG00000144410
ENSG00000118263
ENSG00000118260
ENSG00000178385
ENSG00000188674
ENSG00000078018
ENSG00000144406
ENSG00000197713
ENSG00000234281
ENSG00000178568
ENSG00000174453
ENSG00000235770
ENSG00000118242
ENSG00000115425
ENSG00000163449
ENSG00000079246
ENSG00000279348
ENSG00000260804
ENSG00000144583
ENSG00000138375
ENSG00000115461
ENSG00000233143
ENSG00000231672
ENSG00000261338
ENSG00000127838
ENSG00000144580
ENSG00000115556
ENSG00000115568
ENSG00000074582
ENSG00000163481
ENSG00000115596
ENSG00000171450
ENSG00000163499
ENSG00000187736
ENSG00000144567
ENSG00000198925
ENSG00000127824
ENSG00000054356
ENSG00000182698
ENSG00000072195
ENSG00000123989
ENSG00000188760
ENSG00000124006
ENSG00000114923
ENSG00000116106
ENSG00000272944
ENSG00000267034
ENSG00000237732
ENSG00000261428
ENSG00000116120
ENSG00000123983
ENSG00000171951
ENSG00000152056
ENSG00000085449
ENSG00000036257
ENSG00000144460
ENSG00000273301
ENSG00000169047
ENSG00000236432
ENSG00000153820
ENSG00000153823
ENSG00000187957
ENSG00000163053
ENSG00000135932
ENSG00000135931
ENSG00000283312
ENSG00000163273
ENSG00000251485
ENSG00000171551
ENSG00000237412
ENSG00000135930
ENSG00000237126
ENSG00000066248
ENSG00000085978
ENSG00000259793
ENSG00000077044
ENSG00000188042
ENSG00000227252
ENSG00000227107
ENSG00000124831
ENSG00000177483
ENSG00000178752
ENSG00000132326
ENSG00000204104
ENSG00000233608
ENSG00000068024
ENSG00000130414
ENSG00000063660
ENSG00000218416
ENSG00000188542
ENSG00000130294
ENSG00000115687
ENSG00000006607
ENSG00000115694
ENSG00000154252
ENSG00000188011
ENSG00000233806
ENSG00000280119
ENSG00000261186
ENSG00000134121
ENSG00000224957
ENSG00000134115
ENSG00000144619
ENSG00000113851
ENSG00000175928
ENSG00000170364
ENSG00000231249
ENSG00000150995
ENSG00000235831
ENSG00000134109
ENSG00000196277
ENSG00000071282
ENSG00000125046
ENSG00000196220
ENSG00000134077
ENSG00000156959
ENSG00000144550
ENSG00000114026
ENSG00000156990
ENSG00000163701
ENSG00000163703
ENSG00000163704
ENSG00000269982
ENSG00000180385
ENSG00000186162
ENSG00000144554
ENSG00000134070
ENSG00000157014
ENSG00000231177
ENSG00000240288
ENSG00000157087
ENSG00000157103
ENSG00000197548
ENSG00000144559
ENSG00000157152
ENSG00000154743
ENSG00000225526
ENSG00000144712
ENSG00000272263
ENSG00000144711
ENSG00000233121
ENSG00000163528
ENSG00000154767
ENSG00000144596
ENSG00000131368
ENSG00000206562
ENSG00000144597
ENSG00000154814
ENSG00000271964
ENSG00000272498
ENSG00000272529
ENSG00000154822
ENSG00000131374
ENSG00000182568
ENSG00000183977
ENSG00000151789
ENSG00000182247
ENSG00000174738
ENSG00000151090
ENSG00000077092
ENSG00000077097
ENSG00000179796
ENSG00000234165
ENSG00000163491
ENSG00000213846
ENSG00000163512
ENSG00000144645
ENSG00000197385
ENSG00000152642
ENSG00000261572
ENSG00000144635
ENSG00000170266
ENSG00000173705
ENSG00000153558
ENSG00000153560
ENSG00000163539
ENSG00000271643
ENSG00000271020
ENSG00000172995
ENSG00000144681
ENSG00000279727
ENSG00000281100
ENSG00000168016
ENSG00000178567
ENSG00000144674
ENSG00000230409
ENSG00000144668
ENSG00000235482
ENSG00000236411
ENSG00000136059
ENSG00000172939
ENSG00000144671
ENSG00000229589
ENSG00000183873
ENSG00000144659
ENSG00000202363
ENSG00000170011
ENSG00000114784
ENSG00000168032
ENSG00000177873
ENSG00000168036
ENSG00000182606
ENSG00000187094
ENSG00000114812
ENSG00000093183
ENSG00000008324
ENSG00000144647
ENSG00000163788
ENSG00000271941
ENSG00000160746
ENSG00000272121
ENSG00000280435
ENSG00000261786
ENSG00000233509
ENSG00000169981
ENSG00000186446
ENSG00000163807
ENSG00000249992
ENSG00000211456
ENSG00000163817
ENSG00000283646
ENSG00000163827
ENSG00000227398
ENSG00000088727
ENSG00000114648
ENSG00000280173
ENSG00000114646
ENSG00000132153
ENSG00000164045
ENSG00000145040
ENSG00000008300
ENSG00000213672
ENSG00000068745
ENSG00000114302
ENSG00000178467
ENSG00000178149
ENSG00000198218
ENSG00000145029
ENSG00000226913
ENSG00000164061
ENSG00000164062
ENSG00000164068
ENSG00000173540
ENSG00000176095
ENSG00000164076
ENSG00000164077
ENSG00000186792
ENSG00000243477
ENSG00000114383
ENSG00000007402
ENSG00000271858
ENSG00000088543
ENSG00000088538
ENSG00000145050
ENSG00000259956
ENSG00000164082
ENSG00000280422
ENSG00000164087
ENSG00000023330
ENSG00000247596
ENSG00000164091
ENSG00000163930
ENSG00000010318
ENSG00000010322
ENSG00000163939
ENSG00000163938
ENSG00000275956
ENSG00000213533
ENSG00000280417
ENSG00000163932
ENSG00000157388
ENSG00000271976
ENSG00000113812
ENSG00000157445
ENSG00000187672
ENSG00000163947
ENSG00000174840
ENSG00000163681
ENSG00000163684
ENSG00000163618
ENSG00000163630
ENSG00000224479
ENSG00000163632
ENSG00000151276
ENSG00000270059
ENSG00000163376
ENSG00000183662
ENSG00000144746
ENSG00000163380
ENSG00000114861
ENSG00000270562
ENSG00000277855
ENSG00000170837
ENSG00000113805
ENSG00000244026
ENSG00000272690
ENSG00000239959
ENSG00000243422
ENSG00000236138
ENSG00000185008
ENSG00000240809
ENSG00000169855
ENSG00000114480
ENSG00000175161
ENSG00000206538
ENSG00000281392
ENSG00000179097
ENSG00000044524
ENSG00000178750
ENSG00000178694
ENSG00000080224
ENSG00000261292
ENSG00000113966
ENSG00000057019
ENSG00000184220
ENSG00000114021
ENSG00000154174
ENSG00000206535
ENSG00000181458
ENSG00000081154
ENSG00000066422
ENSG00000170017
ENSG00000114423
ENSG00000243701
ENSG00000273125
ENSG00000240423
ENSG00000114446
ENSG00000163507
ENSG00000198919
ENSG00000240891
ENSG00000144827
ENSG00000144834
ENSG00000091972
ENSG00000279349
ENSG00000163606
ENSG00000163607
ENSG00000072858
ENSG00000176542
ENSG00000121579
ENSG00000114573
ENSG00000184307
ENSG00000172020
ENSG00000185565
ENSG00000144852
ENSG00000082701
ENSG00000145087
ENSG00000173226
ENSG00000114030
ENSG00000273033
ENSG00000082684
ENSG00000065485
ENSG00000121542
ENSG00000173175
ENSG00000206527
ENSG00000160145
ENSG00000221955
ENSG00000241278
ENSG00000171084
ENSG00000189366
ENSG00000114547
ENSG00000114544
ENSG00000250012
ENSG00000280053
ENSG00000114554
ENSG00000073111
ENSG00000114631
ENSG00000114626
ENSG00000261159
ENSG00000231305
ENSG00000177646
ENSG00000114656
ENSG00000279507
ENSG00000114654
ENSG00000172780
ENSG00000273174
ENSG00000181789
ENSG00000206417
ENSG00000163913
ENSG00000172765
ENSG00000271270
ENSG00000170893
ENSG00000251287
ENSG00000253540
ENSG00000249846
ENSG00000196455
ENSG00000017260
ENSG00000250608
ENSG00000261167
ENSG00000081307
ENSG00000272832
ENSG00000091527
ENSG00000242337
ENSG00000144867
ENSG00000154917
ENSG00000154928
ENSG00000174611
ENSG00000240086
ENSG00000174579
ENSG00000114054
ENSG00000168917
ENSG00000239213
ENSG00000158092
ENSG00000158220
ENSG00000280399
ENSG00000051382
ENSG00000158258
ENSG00000114120
ENSG00000155893
ENSG00000069849
ENSG00000114126
ENSG00000175054
ENSG00000120756
ENSG00000188582
ENSG00000241570
ENSG00000175040
ENSG00000241679
ENSG00000244171
ENSG00000241627
ENSG00000114744
ENSG00000224831
ENSG00000196428
ENSG00000144895
ENSG00000198843
ENSG00000244668
ENSG00000181788
ENSG00000181467
ENSG00000174953
ENSG00000196549
ENSG00000114805
ENSG00000174928
ENSG00000163655
ENSG00000169282
ENSG00000174912
ENSG00000240875
ENSG00000244515
ENSG00000243176
ENSG00000163661
ENSG00000174899
ENSG00000174891
ENSG00000079257
ENSG00000118849
ENSG00000240207
ENSG00000271778
ENSG00000151967
ENSG00000180044
ENSG00000163590
ENSG00000169255
ENSG00000169251
ENSG00000196542
ENSG00000121871
ENSG00000163536
ENSG00000206120
ENSG00000242268
ENSG00000272797
ENSG00000184378
ENSG00000085274
ENSG00000269984
ENSG00000163558
ENSG00000013293
ENSG00000163577
ENSG00000144959
ENSG00000114346
ENSG00000169760
ENSG00000177565
ENSG00000197584
ENSG00000272699
ENSG00000058056
ENSG00000053524
ENSG00000240024
ENSG00000199363
ENSG00000163872
ENSG00000114770
ENSG00000223529
ENSG00000145191
ENSG00000161203
ENSG00000161204
ENSG00000145198
ENSG00000145194
ENSG00000163888
ENSG00000175166
ENSG00000175182
ENSG00000090539
ENSG00000182580
ENSG00000156931
ENSG00000163900
ENSG00000163898
ENSG00000163904
ENSG00000244405
ENSG00000058866
ENSG00000090520
ENSG00000283390
ENSG00000263826
ENSG00000231982
ENSG00000163347
ENSG00000188958
ENSG00000114279
ENSG00000180611
ENSG00000127252
ENSG00000198836
ENSG00000233058
ENSG00000244675
ENSG00000229334
ENSG00000041802
ENSG00000173950
ENSG00000229325
ENSG00000224769
ENSG00000176945
ENSG00000061938
ENSG00000224614
ENSG00000226155
ENSG00000163958
ENSG00000235897
ENSG00000163961
ENSG00000214097
ENSG00000185798
ENSG00000174013
ENSG00000174007
ENSG00000119231
ENSG00000119227
ENSG00000272989
ENSG00000161267
ENSG00000273308
ENSG00000236833
ENSG00000145016
ENSG00000122068
ENSG00000273375
ENSG00000185621
ENSG00000250892
ENSG00000198155
ENSG00000272885
ENSG00000182903
ENSG00000273238
ENSG00000283183
ENSG00000185619
ENSG00000168993
ENSG00000145214
ENSG00000178222
ENSG00000159674
ENSG00000159692
ENSG00000090316
ENSG00000163950
ENSG00000013810
ENSG00000168924
ENSG00000109685
ENSG00000185818
ENSG00000130997
ENSG00000159733
ENSG00000063978
ENSG00000125388
ENSG00000197386
ENSG00000188981
ENSG00000159788
ENSG00000109758
ENSG00000175920
ENSG00000261643
ENSG00000163956
ENSG00000250986
ENSG00000184160
ENSG00000251669
ENSG00000168826
ENSG00000168824
ENSG00000247708
ENSG00000280310
ENSG00000072832
ENSG00000181215
ENSG00000152969
ENSG00000249896
ENSG00000251408
ENSG00000074211
ENSG00000013288
ENSG00000246526
ENSG00000170871
ENSG00000173011
ENSG00000272620
ENSG00000196526
ENSG00000163995
ENSG00000205959
ENSG00000249767
ENSG00000178163
ENSG00000002587
ENSG00000205940
ENSG00000248360
ENSG00000249506
ENSG00000169744
ENSG00000047662
ENSG00000109805
ENSG00000145147
ENSG00000185774
ENSG00000109819
ENSG00000181982
ENSG00000153012
ENSG00000091490
ENSG00000109680
ENSG00000109689
ENSG00000169851
ENSG00000181826
ENSG00000169299
ENSG00000134962
ENSG00000121897
ENSG00000163683
ENSG00000078140
ENSG00000154277
ENSG00000109133
ENSG00000183783
ENSG00000177752
ENSG00000151806
ENSG00000163281
ENSG00000273369
ENSG00000260878
ENSG00000109158
ENSG00000145244
ENSG00000259959
ENSG00000163293
ENSG00000145248
ENSG00000109180
ENSG00000145247
ENSG00000109184
ENSG00000272576
ENSG00000188993
ENSG00000109189
ENSG00000128045
ENSG00000184178
ENSG00000145216
ENSG00000072201
ENSG00000157404
ENSG00000134852
ENSG00000272969
ENSG00000109265
ENSG00000174780
ENSG00000196503
ENSG00000128040
ENSG00000269949
ENSG00000084092
ENSG00000047315
ENSG00000145242
ENSG00000250846
ENSG00000250075
ENSG00000109163
ENSG00000227725
ENSG00000171195
ENSG00000132467
ENSG00000132463
ENSG00000132466
ENSG00000250220
ENSG00000169116
ENSG00000138769
ENSG00000138757
ENSG00000138744
ENSG00000198301
ENSG00000156219
ENSG00000189157
ENSG00000163749
ENSG00000186212
ENSG00000138758
ENSG00000138764
ENSG00000138759
ENSG00000248719
ENSG00000152784
ENSG00000138670
ENSG00000273156
ENSG00000138668
ENSG00000152795
ENSG00000138674
ENSG00000138678
ENSG00000163624
ENSG00000273389
ENSG00000145332
ENSG00000198189
ENSG00000163644
ENSG00000138641
ENSG00000249755
ENSG00000177432
ENSG00000138640
ENSG00000180346
ENSG00000270720
ENSG00000185477
ENSG00000145335
ENSG00000184305
ENSG00000279013
ENSG00000152208
ENSG00000182168
ENSG00000271474
ENSG00000168785
ENSG00000164024
ENSG00000272777
ENSG00000164032
ENSG00000145358
ENSG00000138814
ENSG00000153064
ENSG00000109332
ENSG00000164038
ENSG00000138778
ENSG00000168772
ENSG00000251259
ENSG00000168743
ENSG00000155011
ENSG00000188517
ENSG00000249465
ENSG00000109534
ENSG00000180245
ENSG00000170522
ENSG00000260526
ENSG00000178403
ENSG00000250966
ENSG00000145362
ENSG00000145349
ENSG00000213492
ENSG00000164100
ENSG00000164099
ENSG00000281731
ENSG00000172403
ENSG00000249244
ENSG00000245958
ENSG00000164109
ENSG00000138686
ENSG00000138741
ENSG00000224786
ENSG00000181004
ENSG00000151458
ENSG00000164070
ENSG00000261668
ENSG00000142731
ENSG00000138709
ENSG00000151466
ENSG00000151470
ENSG00000184139
ENSG00000250241
ENSG00000138650
ENSG00000151014
ENSG00000137463
ENSG00000196782
ENSG00000196951
ENSG00000153132
ENSG00000109436
ENSG00000273472
ENSG00000170153
ENSG00000164136
ENSG00000109452
ENSG00000197465
ENSG00000251333
ENSG00000278943
ENSG00000170365
ENSG00000151611
ENSG00000164168
ENSG00000151623
ENSG00000198589
ENSG00000270750
ENSG00000109670
ENSG00000268471
ENSG00000137460
ENSG00000109654
ENSG00000121211
ENSG00000121210
ENSG00000145428
ENSG00000164114
ENSG00000164116
ENSG00000260244
ENSG00000061918
ENSG00000109738
ENSG00000120251
ENSG00000171497
ENSG00000052795
ENSG00000109756
ENSG00000168843
ENSG00000145414
ENSG00000164128
ENSG00000164129
ENSG00000038295
ENSG00000109572
ENSG00000229204
ENSG00000174473
ENSG00000164120
ENSG00000145451
ENSG00000150625
ENSG00000150627
ENSG00000164122
ENSG00000129128
ENSG00000218336
ENSG00000272646
ENSG00000232648
ENSG00000173320
ENSG00000151729
ENSG00000164323
ENSG00000109762
ENSG00000168491
ENSG00000249679
ENSG00000154556
ENSG00000233110
ENSG00000109794
ENSG00000250327
ENSG00000180015
ENSG00000245685
ENSG00000164366
ENSG00000063438
ENSG00000180104
ENSG00000188242
ENSG00000225138
ENSG00000066230
ENSG00000112877
ENSG00000171368
ENSG00000071539
ENSG00000145506
ENSG00000049656
ENSG00000153395
ENSG00000185986
ENSG00000164151
ENSG00000215218
ENSG00000250056
ENSG00000145545
ENSG00000247516
ENSG00000150753
ENSG00000271980
ENSG00000164236
ENSG00000154122
ENSG00000183654
ENSG00000154153
ENSG00000176788
ENSG00000271892
ENSG00000215196
[truncated: 5,728 more rows]
