# Supplementary material for: A conditional gene-based association framework integrating isoform-level eQTL data reveals new susceptibility genes for schizophrenia
Source: eLife. 2022 Apr 12;11:e70779. doi: 10.7554/eLife.70779 (PMC9005191; doi:10.7554/eLife.70779)
Supplement: Figure 8—source data 2. [file elife-70779-fig8-data2.xlsx]

## Sheet: Raw_enrichment_results
Enrichment results of the genes in the consensus module (colored “turquoise”)
source	term_name	term_id	adjusted_p_value	negative_log10_of_adjusted_p_value	term_size	query_size	intersection_size	effective_domain_size	intersections
GO:MF	protein binding	GO:0005515	1.89636e-19	18.7221	14767	5392	4501	18679	ENSG00000188976,ENSG00000186891,ENSG00000107404,ENSG00000160075,ENSG00000078369,ENSG00000169885,ENSG00000187730,ENSG00000067606,ENSG00000157933,ENSG00000197921,ENSG00000157870,ENSG00000158109,ENSG00000130764,ENSG00000169598,ENSG00000198912,ENSG00000196581,ENSG00000131697,ENSG00000069424,ENSG00000116254,ENSG00000158286,ENSG00000116237,ENSG00000097021,ENSG00000187017,ENSG00000215788,ENSG00000171680…
137094	ENSG00000165280	ENSG00000198722	ENSG00000198853	ENSG00000107140	ENSG00000107159	ENSG00000137103	ENSG00000185972	ENSG00000159921	ENSG00000137054	ENSG00000147912	ENSG00000070601	ENSG00000107371	ENSG00000122741	ENSG00000137142	ENSG00000172014	ENSG00000147996	ENSG00000196873	ENSG00000107242	ENSG00000187866	ENSG00000107282	ENSG00000165072	ENSG00000107372	ENSG00000156017	ENSG00000106733	ENSG00000134996	ENSG00000135002	ENSG00000187210	ENSG00000106772	ENSG00000197969	ENSG00000106829	ENSG00000172159	ENSG00000135018	ENSG00000178966	ENSG00000135049	ENSG00000196730	ENSG00000156345	ENSG00000106723	ENSG00000148082	ENSG00000123975	ENSG00000165023	ENSG00000090054	ENSG00000196305	ENSG00000188312	ENSG00000175787	ENSG00000182150	ENSG00000130956	ENSG00000136842	ENSG00000136937	ENSG00000106789
GO:MF	voltage-gated channel activity	GO:0022832	7.86668e-18	17.1042	201	5392	121	18679	ENSG00000069424,ENSG00000011021,ENSG00000162494,ENSG00000186510,ENSG00000117013,ENSG00000116396,ENSG00000177301,ENSG00000177272,ENSG00000171385,ENSG00000143630,ENSG00000162728,ENSG00000198216,ENSG00000143473,ENSG00000082482,ENSG00000135750,ENSG00000162975,ENSG00000170745,ENSG00000171303,ENSG00000184261,ENSG00000115041,ENSG00000182389,ENSG00000162989,ENSG00000153253,ENSG00000136531,ENSG00000144285…
GO:MF	voltage-gated ion channel activity	GO:0005244	1.66479e-17	16.7786	200	5392	120	18679	ENSG00000069424,ENSG00000011021,ENSG00000162494,ENSG00000186510,ENSG00000117013,ENSG00000116396,ENSG00000177301,ENSG00000177272,ENSG00000171385,ENSG00000143630,ENSG00000162728,ENSG00000198216,ENSG00000143473,ENSG00000082482,ENSG00000135750,ENSG00000162975,ENSG00000170745,ENSG00000171303,ENSG00000184261,ENSG00000115041,ENSG00000182389,ENSG00000162989,ENSG00000153253,ENSG00000136531,ENSG00000144285…
GO:MF	voltage-gated cation channel activity	GO:0022843	2.60424e-17	16.5843	143	5392	94	18679	ENSG00000069424,ENSG00000162494,ENSG00000117013,ENSG00000116396,ENSG00000177301,ENSG00000177272,ENSG00000171385,ENSG00000143630,ENSG00000162728,ENSG00000198216,ENSG00000143473,ENSG00000082482,ENSG00000135750,ENSG00000162975,ENSG00000170745,ENSG00000171303,ENSG00000182389,ENSG00000162989,ENSG00000007402,ENSG00000157388,ENSG00000157445,ENSG00000169282,ENSG00000164588,ENSG00000185760,ENSG00000135312…
GO:MF	gated channel activity	GO:0022836	5.07416e-16	15.2946	343	5392	176	18679	ENSG00000187730,ENSG00000069424,ENSG00000011021,ENSG00000162494,ENSG00000186510,ENSG00000163873,ENSG00000117013,ENSG00000116396,ENSG00000177301,ENSG00000177272,ENSG00000171385,ENSG00000160716,ENSG00000143630,ENSG00000162728,ENSG00000198216,ENSG00000143473,ENSG00000082482,ENSG00000135750,ENSG00000198626,ENSG00000162975,ENSG00000170745,ENSG00000119782,ENSG00000171303,ENSG00000184261,ENSG00000115041…
GO:MF	metal ion transmembrane transporter activity	GO:0046873	3.94393e-15	14.4041	429	5392	207	18679	ENSG00000069424,ENSG00000162494,ENSG00000090020,ENSG00000163873,ENSG00000117013,ENSG00000117834,ENSG00000116396,ENSG00000177301,ENSG00000177272,ENSG00000171385,ENSG00000163399,ENSG00000143630,ENSG00000162728,ENSG00000143153,ENSG00000198216,ENSG00000058668,ENSG00000143473,ENSG00000082482,ENSG00000135750,ENSG00000198626,ENSG00000162975,ENSG00000170745,ENSG00000119782,ENSG00000171303,ENSG00000115194…
GO:MF	cation channel activity	GO:0005261	6.27811e-14	13.2022	338	5392	169	18679	ENSG00000069424,ENSG00000162494,ENSG00000163873,ENSG00000117013,ENSG00000116396,ENSG00000177301,ENSG00000177272,ENSG00000171385,ENSG00000160716,ENSG00000143630,ENSG00000162728,ENSG00000198216,ENSG00000143473,ENSG00000082482,ENSG00000135750,ENSG00000198626,ENSG00000162975,ENSG00000170745,ENSG00000119782,ENSG00000171303,ENSG00000184261,ENSG00000115041,ENSG00000182389,ENSG00000162989,ENSG00000153253…
GO:MF	ribonucleotide binding	GO:0032553	4.21152e-13	12.3756	1934	5392	712	18679	ENSG00000067606,ENSG00000157881,ENSG00000116254,ENSG00000097021,ENSG00000162408,ENSG00000198793,ENSG00000011021,ENSG00000132881,ENSG00000159363,ENSG00000117245,ENSG00000070886,ENSG00000133216,ENSG00000175087,ENSG00000142751,ENSG00000134684,ENSG00000183317,ENSG00000116954,ENSG00000171793,ENSG00000177181,ENSG00000142945,ENSG00000086015,ENSG00000085999,ENSG00000169213,ENSG00000198841,ENSG00000162396…
GO:MF	purine ribonucleotide binding	GO:0032555	5.20468e-13	12.2836	1917	5392	706	18679	ENSG00000067606,ENSG00000157881,ENSG00000116254,ENSG00000097021,ENSG00000162408,ENSG00000198793,ENSG00000011021,ENSG00000132881,ENSG00000159363,ENSG00000117245,ENSG00000070886,ENSG00000133216,ENSG00000175087,ENSG00000142751,ENSG00000134684,ENSG00000183317,ENSG00000116954,ENSG00000171793,ENSG00000177181,ENSG00000142945,ENSG00000086015,ENSG00000085999,ENSG00000169213,ENSG00000198841,ENSG00000162396…
GO:MF	purine nucleotide binding	GO:0017076	7.34336e-13	12.1341	1932	5392	710	18679	ENSG00000067606,ENSG00000157881,ENSG00000116254,ENSG00000097021,ENSG00000162408,ENSG00000198793,ENSG00000011021,ENSG00000132881,ENSG00000159363,ENSG00000117245,ENSG00000070886,ENSG00000133216,ENSG00000175087,ENSG00000142751,ENSG00000134684,ENSG00000183317,ENSG00000116954,ENSG00000171793,ENSG00000177181,ENSG00000142945,ENSG00000086015,ENSG00000085999,ENSG00000169213,ENSG00000198841,ENSG00000162396…
GO:MF	ion channel activity	GO:0005216	2.54826e-12	11.5938	434	5392	201	18679	ENSG00000187730,ENSG00000069424,ENSG00000011021,ENSG00000162494,ENSG00000186510,ENSG00000163873,ENSG00000117013,ENSG00000142959,ENSG00000197147,ENSG00000121940,ENSG00000116396,ENSG00000177301,ENSG00000177272,ENSG00000171385,ENSG00000160716,ENSG00000143630,ENSG00000162728,ENSG00000198216,ENSG00000143473,ENSG00000082482,ENSG00000135750,ENSG00000198626,ENSG00000162975,ENSG00000170745,ENSG00000119782…
GO:MF	purine ribonucleoside triphosphate binding	GO:0035639	2.77941e-12	11.556	1846	5392	679	18679	ENSG00000067606,ENSG00000157881,ENSG00000116254,ENSG00000162408,ENSG00000198793,ENSG00000011021,ENSG00000132881,ENSG00000159363,ENSG00000117245,ENSG00000070886,ENSG00000133216,ENSG00000175087,ENSG00000142751,ENSG00000134684,ENSG00000183317,ENSG00000116954,ENSG00000171793,ENSG00000177181,ENSG00000142945,ENSG00000086015,ENSG00000085999,ENSG00000169213,ENSG00000198841,ENSG00000162396,ENSG00000162409…
GO:MF	nucleotide binding	GO:0000166	1.72351e-11	10.7636	2176	5392	780	18679	ENSG00000067606,ENSG00000157881,ENSG00000116254,ENSG00000097021,ENSG00000162408,ENSG00000198793,ENSG00000177000,ENSG00000011021,ENSG00000132881,ENSG00000159363,ENSG00000117245,ENSG00000070886,ENSG00000133216,ENSG00000004487,ENSG00000175087,ENSG00000142751,ENSG00000134684,ENSG00000183317,ENSG00000116954,ENSG00000116981,ENSG00000171793,ENSG00000177181,ENSG00000142945,ENSG00000086015,ENSG00000085999…
GO:MF	nucleoside phosphate binding	GO:1901265	1.93862e-11	10.7125	2177	5392	780	18679	ENSG00000067606,ENSG00000157881,ENSG00000116254,ENSG00000097021,ENSG00000162408,ENSG00000198793,ENSG00000177000,ENSG00000011021,ENSG00000132881,ENSG00000159363,ENSG00000117245,ENSG00000070886,ENSG00000133216,ENSG00000004487,ENSG00000175087,ENSG00000142751,ENSG00000134684,ENSG00000183317,ENSG00000116954,ENSG00000116981,ENSG00000171793,ENSG00000177181,ENSG00000142945,ENSG00000086015,ENSG00000085999…
GO:MF	anion binding	GO:0043168	3.6111e-11	10.4424	2413	5392	853	18679	ENSG00000067606,ENSG00000157881,ENSG00000116254,ENSG00000162408,ENSG00000198793,ENSG00000177000,ENSG00000011021,ENSG00000132881,ENSG00000159363,ENSG00000117245,ENSG00000070886,ENSG00000133216,ENSG00000004487,ENSG00000175087,ENSG00000142751,ENSG00000090020,ENSG00000130766,ENSG00000121769,ENSG00000134684,ENSG00000183317,ENSG00000116954,ENSG00000171793,ENSG00000177181,ENSG00000142945,ENSG00000086015…
GO:MF	ion binding	GO:0043167	7.69209e-11	10.114	6056	5392	1961	18679	ENSG00000169885,ENSG00000067606,ENSG00000157933,ENSG00000157881,ENSG00000142606,ENSG00000116254,ENSG00000158286,ENSG00000162408,ENSG00000116273,ENSG00000171603,ENSG00000198793,ENSG00000177000,ENSG00000011021,ENSG00000116731,ENSG00000142634,ENSG00000116771,ENSG00000186510,ENSG00000132881,ENSG00000159363,ENSG00000090432,ENSG00000117245,ENSG00000070886,ENSG00000133216,ENSG00000004487,ENSG00000179546…
GO:MF	channel activity	GO:0015267	9.6897e-11	10.0137	483	5392	214	18679	ENSG00000187730,ENSG00000069424,ENSG00000011021,ENSG00000162494,ENSG00000186510,ENSG00000189280,ENSG00000188910,ENSG00000163873,ENSG00000117013,ENSG00000142959,ENSG00000197147,ENSG00000121940,ENSG00000116396,ENSG00000177301,ENSG00000177272,ENSG00000171385,ENSG00000160716,ENSG00000143630,ENSG00000162728,ENSG00000158882,ENSG00000198216,ENSG00000143473,ENSG00000082482,ENSG00000135750,ENSG00000198626…
GO:MF	passive transmembrane transporter activity	GO:0022803	9.6897e-11	10.0137	483	5392	214	18679	ENSG00000187730,ENSG00000069424,ENSG00000011021,ENSG00000162494,ENSG00000186510,ENSG00000189280,ENSG00000188910,ENSG00000163873,ENSG00000117013,ENSG00000142959,ENSG00000197147,ENSG00000121940,ENSG00000116396,ENSG00000177301,ENSG00000177272,ENSG00000171385,ENSG00000160716,ENSG00000143630,ENSG00000162728,ENSG00000158882,ENSG00000198216,ENSG00000143473,ENSG00000082482,ENSG00000135750,ENSG00000198626…
GO:MF	potassium ion transmembrane transporter activity	GO:0015079	1.70992e-10	9.76702	160	5392	90	18679	ENSG00000069424,ENSG00000162494,ENSG00000090020,ENSG00000163873,ENSG00000117013,ENSG00000116396,ENSG00000177301,ENSG00000177272,ENSG00000171385,ENSG00000163399,ENSG00000143630,ENSG00000162728,ENSG00000143153,ENSG00000143473,ENSG00000082482,ENSG00000135750,ENSG00000162975,ENSG00000170745,ENSG00000171303,ENSG00000184261,ENSG00000115041,ENSG00000115616,ENSG00000162989,ENSG00000221955,ENSG00000069849…
GO:MF	inorganic cation transmembrane transporter activity	GO:0022890	4.12211e-10	9.38488	596	5392	252	18679	ENSG00000069424,ENSG00000162426,ENSG00000162494,ENSG00000159363,ENSG00000090020,ENSG00000163873,ENSG00000117013,ENSG00000117834,ENSG00000116396,ENSG00000177301,ENSG00000177272,ENSG00000171385,ENSG00000163399,ENSG00000160716,ENSG00000143630,ENSG00000162728,ENSG00000143153,ENSG00000198216,ENSG00000058668,ENSG00000143473,ENSG00000082482,ENSG00000135750,ENSG00000198626,ENSG00000162975,ENSG00000170745…
GO:MF	potassium channel activity	GO:0005267	6.67419e-10	9.1756	125	5392	74	18679	ENSG00000069424,ENSG00000162494,ENSG00000163873,ENSG00000117013,ENSG00000116396,ENSG00000177301,ENSG00000177272,ENSG00000171385,ENSG00000143630,ENSG00000162728,ENSG00000143473,ENSG00000082482,ENSG00000135750,ENSG00000162975,ENSG00000170745,ENSG00000171303,ENSG00000184261,ENSG00000115041,ENSG00000162989,ENSG00000169282,ENSG00000197584,ENSG00000185774,ENSG00000164588,ENSG00000080709,ENSG00000182132…
GO:MF	cation transmembrane transporter activity	GO:0008324	9.70172e-10	9.01315	643	5392	267	18679	ENSG00000069424,ENSG00000162426,ENSG00000162494,ENSG00000159363,ENSG00000090020,ENSG00000163873,ENSG00000117013,ENSG00000117834,ENSG00000116396,ENSG00000177301,ENSG00000177272,ENSG00000171385,ENSG00000163399,ENSG00000160716,ENSG00000143630,ENSG00000162728,ENSG00000143153,ENSG00000198216,ENSG00000058668,ENSG00000143473,ENSG00000082482,ENSG00000135750,ENSG00000198626,ENSG00000162975,ENSG00000170745…
GO:MF	small molecule binding	GO:0036094	1.63586e-09	8.78625	2516	5392	874	18679	ENSG00000067606,ENSG00000157881,ENSG00000116254,ENSG00000097021,ENSG00000162408,ENSG00000198793,ENSG00000177000,ENSG00000011021,ENSG00000132881,ENSG00000159363,ENSG00000117245,ENSG00000070886,ENSG00000133216,ENSG00000004487,ENSG00000175087,ENSG00000142751,ENSG00000121769,ENSG00000134684,ENSG00000183317,ENSG00000116954,ENSG00000116981,ENSG00000171793,ENSG00000177181,ENSG00000142945,ENSG00000086015…
GO:MF	carbohydrate derivative binding	GO:0097367	2.00213e-09	8.69851	2282	5392	800	18679	ENSG00000067606,ENSG00000157881,ENSG00000116254,ENSG00000097021,ENSG00000162408,ENSG00000198793,ENSG00000011021,ENSG00000132881,ENSG00000159363,ENSG00000117245,ENSG00000070886,ENSG00000133216,ENSG00000175087,ENSG00000142751,ENSG00000134684,ENSG00000183317,ENSG00000116954,ENSG00000171793,ENSG00000177181,ENSG00000142945,ENSG00000086015,ENSG00000085999,ENSG00000169213,ENSG00000198841,ENSG00000162396…
GO:MF	inorganic molecular entity transmembrane transporter activity	GO:0015318	2.86358e-09	8.54309	721	5392	292	18679	ENSG00000187730,ENSG00000069424,ENSG00000162426,ENSG00000011021,ENSG00000162494,ENSG00000186510,ENSG00000159363,ENSG00000090020,ENSG00000163873,ENSG00000117013,ENSG00000142959,ENSG00000117834,ENSG00000197147,ENSG00000121940,ENSG00000116396,ENSG00000177301,ENSG00000177272,ENSG00000171385,ENSG00000163399,ENSG00000160716,ENSG00000143630,ENSG00000162728,ENSG00000143153,ENSG00000143324,ENSG00000198216…
GO:MF	transferase activity	GO:0016740	6.35584e-09	8.19683	2341	5392	815	18679	ENSG00000176022,ENSG00000067606,ENSG00000157881,ENSG00000116237,ENSG00000162408,ENSG00000130939,ENSG00000198793,ENSG00000120942,ENSG00000116661,ENSG00000132879,ENSG00000116731,ENSG00000090432,ENSG00000070886,ENSG00000133216,ENSG00000158008,ENSG00000175087,ENSG00000117682,ENSG00000204160,ENSG00000130772,ENSG00000116514,ENSG00000183317,ENSG00000196449,ENSG00000126091,ENSG00000132768,ENSG00000070785…
GO:MF	voltage-gated potassium channel activity	GO:0005249	1.17062e-08	7.93158	89	5392	56	18679	ENSG00000069424,ENSG00000162494,ENSG00000117013,ENSG00000116396,ENSG00000177301,ENSG00000177272,ENSG00000171385,ENSG00000143630,ENSG00000162728,ENSG00000143473,ENSG00000082482,ENSG00000135750,ENSG00000162975,ENSG00000170745,ENSG00000171303,ENSG00000162989,ENSG00000169282,ENSG00000164588,ENSG00000185760,ENSG00000184408,ENSG00000055118,ENSG00000156486,ENSG00000184156,ENSG00000169427,ENSG00000168263…
GO:MF	ion channel binding	GO:0044325	1.45294e-08	7.83775	138	5392	77	18679	ENSG00000069424,ENSG00000158286,ENSG00000162494,ENSG00000117016,ENSG00000171385,ENSG00000143473,ENSG00000077522,ENSG00000198626,ENSG00000115738,ENSG00000119782,ENSG00000183023,ENSG00000115041,ENSG00000175497,ENSG00000113851,ENSG00000152642,ENSG00000144681,ENSG00000183873,ENSG00000168036,ENSG00000169282,ENSG00000161203,ENSG00000114279,ENSG00000197386,ENSG00000145362,ENSG00000145349,ENSG00000152413…
GO:MF	adenyl ribonucleotide binding	GO:0032559	1.67862e-08	7.77505	1564	5392	566	18679	ENSG00000067606,ENSG00000157881,ENSG00000116254,ENSG00000097021,ENSG00000162408,ENSG00000198793,ENSG00000011021,ENSG00000159363,ENSG00000117245,ENSG00000070886,ENSG00000133216,ENSG00000175087,ENSG00000134684,ENSG00000183317,ENSG00000171793,ENSG00000177181,ENSG00000142945,ENSG00000086015,ENSG00000085999,ENSG00000198841,ENSG00000162396,ENSG00000162409,ENSG00000162434,ENSG00000116783,ENSG00000057468…
GO:MF	adenyl nucleotide binding	GO:0030554	1.78917e-08	7.74735	1577	5392	570	18679	ENSG00000067606,ENSG00000157881,ENSG00000116254,ENSG00000097021,ENSG00000162408,ENSG00000198793,ENSG00000011021,ENSG00000159363,ENSG00000117245,ENSG00000070886,ENSG00000133216,ENSG00000175087,ENSG00000134684,ENSG00000183317,ENSG00000171793,ENSG00000177181,ENSG00000142945,ENSG00000086015,ENSG00000085999,ENSG00000198841,ENSG00000162396,ENSG00000162409,ENSG00000162434,ENSG00000116783,ENSG00000057468…
GO:MF	cytoskeletal protein binding	GO:0008092	8.70038e-08	7.06046	1001	5392	379	18679	ENSG00000078369,ENSG00000187017,ENSG00000188807,ENSG00000171603,ENSG00000142655,ENSG00000116786,ENSG00000117245,ENSG00000117602,ENSG00000204178,ENSG00000117632,ENSG00000159023,ENSG00000121769,ENSG00000121905,ENSG00000131236,ENSG00000142945,ENSG00000197429,ENSG00000086015,ENSG00000186094,ENSG00000169213,ENSG00000157193,ENSG00000134709,ENSG00000118473,ENSG00000116783,ENSG00000162614,ENSG00000177301…
GO:MF	binding	GO:0005488	1.05056e-07	6.97858	17070	5392	5034	18679	ENSG00000188976,ENSG00000186891,ENSG00000107404,ENSG00000160075,ENSG00000078369,ENSG00000169885,ENSG00000187730,ENSG00000067606,ENSG00000157933,ENSG00000157881,ENSG00000197921,ENSG00000157870,ENSG00000142606,ENSG00000158109,ENSG00000130764,ENSG00000169598,ENSG00000198912,ENSG00000196581,ENSG00000131697,ENSG00000069424,ENSG00000116254,ENSG00000158286,ENSG00000116237,ENSG00000097021,ENSG00000187017…
106123	ENSG00000165125	ENSG00000159784	ENSG00000198420	ENSG00000196511	ENSG00000174469	ENSG00000055130	ENSG00000197362	ENSG00000204947	ENSG00000197024	ENSG00000196453	ENSG00000181220	ENSG00000181444	ENSG00000106526	ENSG00000127399	ENSG00000055118	ENSG00000164885	ENSG00000133612	ENSG00000033050	ENSG00000082014	ENSG00000106617	ENSG00000178234	ENSG00000196584	ENSG00000133627	ENSG00000157219	ENSG00000164778	ENSG00000164690	ENSG00000105983	ENSG00000009335	ENSG00000105993	ENSG00000146918	ENSG00000117868	ENSG00000104714	ENSG00000198010	ENSG00000176595	ENSG00000036448	ENSG00000147316	ENSG00000275342	ENSG00000147324	ENSG00000104643	ENSG00000154328	ENSG00000145002	ENSG00000250305	ENSG00000164741	ENSG00000164743	ENSG00000185053	ENSG00000155970	ENSG00000104219	ENSG00000155975	ENSG00000003987
GO:MF	enzyme binding	GO:0019899	1.16167e-07	6.93492	2048	5392	714	18679	ENSG00000107404,ENSG00000078369,ENSG00000067606,ENSG00000157933,ENSG00000169598,ENSG00000130939,ENSG00000198793,ENSG00000162545,ENSG00000090432,ENSG00000076864,ENSG00000004487,ENSG00000117602,ENSG00000175793,ENSG00000090020,ENSG00000142784,ENSG00000162521,ENSG00000121905,ENSG00000116514,ENSG00000116954,ENSG00000131236,ENSG00000117016,ENSG00000086015,ENSG00000116133,ENSG00000177606,ENSG00000162434…
GO:MF	ATP binding	GO:0005524	1.82785e-07	6.73806	1500	5392	539	18679	ENSG00000067606,ENSG00000157881,ENSG00000116254,ENSG00000162408,ENSG00000198793,ENSG00000011021,ENSG00000159363,ENSG00000117245,ENSG00000070886,ENSG00000133216,ENSG00000175087,ENSG00000134684,ENSG00000183317,ENSG00000171793,ENSG00000177181,ENSG00000142945,ENSG00000086015,ENSG00000085999,ENSG00000198841,ENSG00000162396,ENSG00000162409,ENSG00000162434,ENSG00000116783,ENSG00000057468,ENSG00000154027…
GO:MF	tubulin binding	GO:0015631	2.33034e-07	6.63258	381	5392	166	18679	ENSG00000142655,ENSG00000117245,ENSG00000204178,ENSG00000117632,ENSG00000142945,ENSG00000086015,ENSG00000186094,ENSG00000134709,ENSG00000118473,ENSG00000143363,ENSG00000132718,ENSG00000117477,ENSG00000197959,ENSG00000116161,ENSG00000116741,ENSG00000118200,ENSG00000116852,ENSG00000143494,ENSG00000117724,ENSG00000154429,ENSG00000212916,ENSG00000184731,ENSG00000084731,ENSG00000157851,ENSG00000084764…
GO:MF	glutamate receptor activity	GO:0008066	8.64387e-07	6.06329	27	5392	23	18679	ENSG00000163873,ENSG00000196277,ENSG00000164082,ENSG00000152208,ENSG00000120251,ENSG00000155511,ENSG00000113262,ENSG00000124493,ENSG00000164418,ENSG00000152822,ENSG00000179603,ENSG00000120899,ENSG00000198785,ENSG00000176884,ENSG00000168959,ENSG00000152578,ENSG00000149403,ENSG00000273079,ENSG00000183454,ENSG00000105737,ENSG00000105464,ENSG00000171189,ENSG00000125675
GO:MF	ion transmembrane transporter activity	GO:0015075	1.52072e-06	5.81795	845	5392	321	18679	ENSG00000187730,ENSG00000069424,ENSG00000162426,ENSG00000011021,ENSG00000162494,ENSG00000186510,ENSG00000159363,ENSG00000090020,ENSG00000163873,ENSG00000117013,ENSG00000142959,ENSG00000117834,ENSG00000197147,ENSG00000085491,ENSG00000121940,ENSG00000116396,ENSG00000177301,ENSG00000177272,ENSG00000171385,ENSG00000163399,ENSG00000160716,ENSG00000143630,ENSG00000162728,ENSG00000143153,ENSG00000117479…
GO:MF	transmembrane transporter activity	GO:0022857	1.5261e-06	5.81642	1080	5392	398	18679	ENSG00000189339,ENSG00000187730,ENSG00000069424,ENSG00000162426,ENSG00000011021,ENSG00000162494,ENSG00000186510,ENSG00000159363,ENSG00000090020,ENSG00000189280,ENSG00000188910,ENSG00000116885,ENSG00000163873,ENSG00000117013,ENSG00000142959,ENSG00000117834,ENSG00000137968,ENSG00000197147,ENSG00000156875,ENSG00000085491,ENSG00000121940,ENSG00000197106,ENSG00000116396,ENSG00000177301,ENSG00000177272…
GO:MF	transporter activity	GO:0005215	2.53169e-06	5.59659	1186	5392	431	18679	ENSG00000189339,ENSG00000187730,ENSG00000069424,ENSG00000162426,ENSG00000011021,ENSG00000162494,ENSG00000186510,ENSG00000159363,ENSG00000090020,ENSG00000121769,ENSG00000189280,ENSG00000188910,ENSG00000116885,ENSG00000163873,ENSG00000117013,ENSG00000142959,ENSG00000117834,ENSG00000137968,ENSG00000197147,ENSG00000156875,ENSG00000085491,ENSG00000121940,ENSG00000197106,ENSG00000116396,ENSG00000177301…
GO:MF	calcium ion transmembrane transporter activity	GO:0015085	2.6771e-06	5.57234	135	5392	71	18679	ENSG00000198216,ENSG00000058668,ENSG00000198626,ENSG00000119782,ENSG00000183023,ENSG00000182389,ENSG00000150995,ENSG00000157087,ENSG00000007402,ENSG00000157388,ENSG00000157445,ENSG00000017260,ENSG00000168924,ENSG00000109689,ENSG00000138741,ENSG00000150625,ENSG00000197043,ENSG00000135312,ENSG00000118432,ENSG00000158683,ENSG00000153956,ENSG00000160991,ENSG00000165125,ENSG00000164885,ENSG00000155886…
GO:MF	catalytic activity	GO:0003824	3.43784e-06	5.46371	5682	5392	1803	18679	ENSG00000176022,ENSG00000160075,ENSG00000078369,ENSG00000067606,ENSG00000157881,ENSG00000157870,ENSG00000142606,ENSG00000130764,ENSG00000169598,ENSG00000069424,ENSG00000116254,ENSG00000116237,ENSG00000097021,ENSG00000162408,ENSG00000130939,ENSG00000198793,ENSG00000120942,ENSG00000116661,ENSG00000132879,ENSG00000177000,ENSG00000116731,ENSG00000116771,ENSG00000197312,ENSG00000233954,ENSG00000132881…
GO:MF	voltage-gated calcium channel activity	GO:0005245	6.03157e-06	5.21957	46	5392	32	18679	ENSG00000198216,ENSG00000182389,ENSG00000007402,ENSG00000157388,ENSG00000157445,ENSG00000135312,ENSG00000118432,ENSG00000153956,ENSG00000164885,ENSG00000107130,ENSG00000148408,ENSG00000165995,ENSG00000185933,ENSG00000162341,ENSG00000151067,ENSG00000167535,ENSG00000196557,ENSG00000006116,ENSG00000067191,ENSG00000006283,ENSG00000005379,ENSG00000075429,ENSG00000075461,ENSG00000108878,ENSG00000141837…
GO:MF	transferase activity, transferring phosphorus-containing groups	GO:0016772	6.67609e-06	5.17548	947	5392	351	18679	ENSG00000067606,ENSG00000157881,ENSG00000162408,ENSG00000198793,ENSG00000070886,ENSG00000133216,ENSG00000175087,ENSG00000183317,ENSG00000196449,ENSG00000070785,ENSG00000086015,ENSG00000117461,ENSG00000162409,ENSG00000162434,ENSG00000254685,ENSG00000116783,ENSG00000154027,ENSG00000142875,ENSG00000081026,ENSG00000186141,ENSG00000143590,ENSG00000143627,ENSG00000198400,ENSG00000152332,ENSG00000143179…
GO:MF	clathrin binding	GO:0030276	6.82033e-06	5.16619	70	5392	43	18679	ENSG00000116675,ENSG00000134262,ENSG00000134207,ENSG00000132718,ENSG00000143858,ENSG00000187957,ENSG00000161203,ENSG00000168824,ENSG00000151466,ENSG00000113282,ENSG00000170091,ENSG00000112305,ENSG00000065609,ENSG00000104490,ENSG00000148358,ENSG00000204176,ENSG00000130643,ENSG00000183020,ENSG00000019505,ENSG00000011347,ENSG00000173227,ENSG00000137672,ENSG00000087470,ENSG00000188906,ENSG00000067715…
GO:MF	SNARE binding	GO:0000149	8.6604e-06	5.06246	113	5392	61	18679	ENSG00000126107,ENSG00000134207,ENSG00000265808,ENSG00000132718,ENSG00000135823,ENSG00000143858,ENSG00000143740,ENSG00000168118,ENSG00000151779,ENSG00000163630,ENSG00000178750,ENSG00000145087,ENSG00000168993,ENSG00000184178,ENSG00000145335,ENSG00000180104,ENSG00000145920,ENSG00000065609,ENSG00000164440,ENSG00000164506,ENSG00000106089,ENSG00000004766,ENSG00000147642,ENSG00000171045,ENSG00000198722…
GO:MF	microtubule binding	GO:0008017	1.58139e-05	4.80096	273	5392	121	18679	ENSG00000142655,ENSG00000117245,ENSG00000204178,ENSG00000142945,ENSG00000086015,ENSG00000134709,ENSG00000118473,ENSG00000117477,ENSG00000197959,ENSG00000118200,ENSG00000116852,ENSG00000143494,ENSG00000117724,ENSG00000154429,ENSG00000212916,ENSG00000084731,ENSG00000157851,ENSG00000084764,ENSG00000138100,ENSG00000021574,ENSG00000115841,ENSG00000138095,ENSG00000214595,ENSG00000204843,ENSG00000068615…
GO:MF	kinase activity	GO:0016301	1.91882e-05	4.71697	793	5392	298	18679	ENSG00000067606,ENSG00000157881,ENSG00000162408,ENSG00000198793,ENSG00000070886,ENSG00000133216,ENSG00000175087,ENSG00000183317,ENSG00000086015,ENSG00000117461,ENSG00000162409,ENSG00000162434,ENSG00000116783,ENSG00000154027,ENSG00000142875,ENSG00000081026,ENSG00000143590,ENSG00000143627,ENSG00000198400,ENSG00000152332,ENSG00000143179,ENSG00000143156,ENSG00000000457,ENSG00000116199,ENSG00000143322…
GO:MF	syntaxin binding	GO:0019905	2.73936e-05	4.56235	77	5392	45	18679	ENSG00000126107,ENSG00000134207,ENSG00000265808,ENSG00000135823,ENSG00000143858,ENSG00000143740,ENSG00000168118,ENSG00000163630,ENSG00000145087,ENSG00000168993,ENSG00000184178,ENSG00000145920,ENSG00000164440,ENSG00000164506,ENSG00000147642,ENSG00000198722,ENSG00000196730,ENSG00000136854,ENSG00000167110,ENSG00000011347,ENSG00000173227,ENSG00000160695,ENSG00000139190,ENSG00000188906,ENSG00000067715…
GO:MF	GTPase binding	GO:0051020	2.92831e-05	4.53338	295	5392	128	18679	ENSG00000107404,ENSG00000078369,ENSG00000076864,ENSG00000116954,ENSG00000117016,ENSG00000137942,ENSG00000143093,ENSG00000152061,ENSG00000213047,ENSG00000198700,ENSG00000136628,ENSG00000116903,ENSG00000203668,ENSG00000134318,ENSG00000197872,ENSG00000135631,ENSG00000135956,ENSG00000135968,ENSG00000169629,ENSG00000115839,ENSG00000091428,ENSG00000061676,ENSG00000003393,ENSG00000138443,ENSG00000054356…
GO:MF	ion channel regulator activity	GO:0099106	9.93e-05	4.00305	142	5392	70	18679	ENSG00000067606,ENSG00000069424,ENSG00000162494,ENSG00000116983,ENSG00000181754,ENSG00000058668,ENSG00000082482,ENSG00000170745,ENSG00000119782,ENSG00000179915,ENSG00000115041,ENSG00000174501,ENSG00000175497,ENSG00000150995,ENSG00000152642,ENSG00000164082,ENSG00000213533,ENSG00000169282,ENSG00000197584,ENSG00000114279,ENSG00000185774,ENSG00000109689,ENSG00000145349,ENSG00000151466,ENSG00000182132…
GO:MF	small GTPase binding	GO:0031267	0.000160795	3.79373	263	5392	114	18679	ENSG00000107404,ENSG00000076864,ENSG00000117016,ENSG00000143093,ENSG00000152061,ENSG00000213047,ENSG00000198700,ENSG00000116903,ENSG00000203668,ENSG00000134318,ENSG00000197872,ENSG00000135631,ENSG00000135956,ENSG00000135968,ENSG00000169629,ENSG00000115839,ENSG00000091428,ENSG00000061676,ENSG00000003393,ENSG00000138443,ENSG00000144674,ENSG00000170011,ENSG00000114346,ENSG00000086200,ENSG00000158985…
GO:MF	sodium channel activity	GO:0005272	0.000179165	3.74675	44	5392	29	18679	ENSG00000163873,ENSG00000143630,ENSG00000135750,ENSG00000153253,ENSG00000136531,ENSG00000144285,ENSG00000169432,ENSG00000136546,ENSG00000183873,ENSG00000164588,ENSG00000164418,ENSG00000177098,ENSG00000149575,ENSG00000149403,ENSG00000166257,ENSG00000110881,ENSG00000196876,ENSG00000102452,ENSG00000138622,ENSG00000196557,ENSG00000108684,ENSG00000006283,ENSG00000007314,ENSG00000099822,ENSG00000105737…
GO:MF	calcium channel activity	GO:0005262	0.000270123	3.56844	119	5392	60	18679	ENSG00000198216,ENSG00000198626,ENSG00000119782,ENSG00000182389,ENSG00000150995,ENSG00000007402,ENSG00000157388,ENSG00000157445,ENSG00000109689,ENSG00000138741,ENSG00000150625,ENSG00000197043,ENSG00000135312,ENSG00000118432,ENSG00000158683,ENSG00000153956,ENSG00000160991,ENSG00000165125,ENSG00000164885,ENSG00000155886,ENSG00000198785,ENSG00000107130,ENSG00000176884,ENSG00000148408,ENSG00000165995…
GO:MF	GTPase activity	GO:0003924	0.000319914	3.49497	300	5392	126	18679	ENSG00000078369,ENSG00000132881,ENSG00000076864,ENSG00000142751,ENSG00000116954,ENSG00000169213,ENSG00000162595,ENSG00000197959,ENSG00000168118,ENSG00000115137,ENSG00000119787,ENSG00000085760,ENSG00000144118,ENSG00000222014,ENSG00000233087,ENSG00000075886,ENSG00000127824,ENSG00000188042,ENSG00000113966,ENSG00000172780,ENSG00000154917,ENSG00000181467,ENSG00000198836,ENSG00000041802,ENSG00000151806…
GO:MF	neurotransmitter receptor activity	GO:0030594	0.000357197	3.44709	107	5392	55	18679	ENSG00000187730,ENSG00000179546,ENSG00000163873,ENSG00000160716,ENSG00000179097,ENSG00000109158,ENSG00000152208,ENSG00000109738,ENSG00000120251,ENSG00000145451,ENSG00000155511,ENSG00000145864,ENSG00000145863,ENSG00000022355,ENSG00000113327,ENSG00000184845,ENSG00000113749,ENSG00000204681,ENSG00000135312,ENSG00000168830,ENSG00000164418,ENSG00000152822,ENSG00000181072,ENSG00000157219,ENSG00000120899…
GO:MF	channel regulator activity	GO:0016247	0.000389056	3.40999	120	5392	60	18679	ENSG00000067606,ENSG00000069424,ENSG00000162494,ENSG00000181754,ENSG00000058668,ENSG00000082482,ENSG00000143786,ENSG00000170745,ENSG00000119782,ENSG00000115041,ENSG00000174501,ENSG00000175497,ENSG00000150995,ENSG00000152642,ENSG00000169282,ENSG00000197584,ENSG00000114279,ENSG00000185774,ENSG00000145349,ENSG00000151466,ENSG00000182132,ENSG00000112293,ENSG00000106089,ENSG00000130226,ENSG00000180155…
GO:MF	ionotropic glutamate receptor activity	GO:0004970	0.000409404	3.38785	19	5392	16	18679	ENSG00000163873,ENSG00000152208,ENSG00000120251,ENSG00000155511,ENSG00000164418,ENSG00000120899,ENSG00000198785,ENSG00000176884,ENSG00000152578,ENSG00000149403,ENSG00000273079,ENSG00000183454,ENSG00000105737,ENSG00000105464,ENSG00000171189,ENSG00000125675
GO:MF	glutamate receptor binding	GO:0035254	0.000616529	3.21005	48	5392	30	18679	ENSG00000197959,ENSG00000168118,ENSG00000144596,ENSG00000152413,ENSG00000070808,ENSG00000162105,ENSG00000149295,ENSG00000179841,ENSG00000198668,ENSG00000058335,ENSG00000103942,ENSG00000006116,ENSG00000171208,ENSG00000103154,ENSG00000132535,ENSG00000132589,ENSG00000176749,ENSG00000073969,ENSG00000075461,ENSG00000166342,ENSG00000051128,ENSG00000160014,ENSG00000161681,ENSG00000171867,ENSG00000101463…
GO:MF	voltage-gated sodium channel activity	GO:0005248	0.000620841	3.20702	23	5392	18	18679	ENSG00000143630,ENSG00000153253,ENSG00000136531,ENSG00000144285,ENSG00000169432,ENSG00000136546,ENSG00000183873,ENSG00000164588,ENSG00000177098,ENSG00000149575,ENSG00000166257,ENSG00000196876,ENSG00000138622,ENSG00000196557,ENSG00000006283,ENSG00000007314,ENSG00000099822,ENSG00000100346
GO:MF	syntaxin-1 binding	GO:0017075	0.000711075	3.14808	27	5392	20	18679	ENSG00000163630,ENSG00000168993,ENSG00000145920,ENSG00000164506,ENSG00000147642,ENSG00000198722,ENSG00000196730,ENSG00000136854,ENSG00000188906,ENSG00000067715,ENSG00000137766,ENSG00000167371,ENSG00000220205,ENSG00000108576,ENSG00000073969,ENSG00000132872,ENSG00000130477,ENSG00000101298,ENSG00000132639,ENSG00000102003
GO:MF	transmitter-gated ion channel activity	GO:0022824	0.000853284	3.06891	60	5392	35	18679	ENSG00000187730,ENSG00000163873,ENSG00000160716,ENSG00000109158,ENSG00000152208,ENSG00000109738,ENSG00000120251,ENSG00000145451,ENSG00000155511,ENSG00000145864,ENSG00000145863,ENSG00000022355,ENSG00000113327,ENSG00000164418,ENSG00000120899,ENSG00000120903,ENSG00000198785,ENSG00000176884,ENSG00000152578,ENSG00000149403,ENSG00000273079,ENSG00000166206,ENSG00000186297,ENSG00000182256,ENSG00000175344…
GO:MF	transmitter-gated channel activity	GO:0022835	0.000853284	3.06891	60	5392	35	18679	ENSG00000187730,ENSG00000163873,ENSG00000160716,ENSG00000109158,ENSG00000152208,ENSG00000109738,ENSG00000120251,ENSG00000145451,ENSG00000155511,ENSG00000145864,ENSG00000145863,ENSG00000022355,ENSG00000113327,ENSG00000164418,ENSG00000120899,ENSG00000120903,ENSG00000198785,ENSG00000176884,ENSG00000152578,ENSG00000149403,ENSG00000273079,ENSG00000166206,ENSG00000186297,ENSG00000182256,ENSG00000175344…
GO:MF	phosphotransferase activity, alcohol group as acceptor	GO:0016773	0.000855088	3.06799	690	5392	255	18679	ENSG00000067606,ENSG00000157881,ENSG00000162408,ENSG00000198793,ENSG00000070886,ENSG00000133216,ENSG00000175087,ENSG00000183317,ENSG00000086015,ENSG00000117461,ENSG00000162409,ENSG00000162434,ENSG00000116783,ENSG00000142875,ENSG00000143590,ENSG00000143627,ENSG00000198400,ENSG00000152332,ENSG00000000457,ENSG00000116199,ENSG00000143322,ENSG00000008118,ENSG00000136643,ENSG00000116141,ENSG00000154358…
GO:MF	GTP binding	GO:0005525	0.000965886	3.01507	381	5392	152	18679	ENSG00000132881,ENSG00000142751,ENSG00000116954,ENSG00000169213,ENSG00000162595,ENSG00000254685,ENSG00000197959,ENSG00000143761,ENSG00000168118,ENSG00000035687,ENSG00000115137,ENSG00000013016,ENSG00000119787,ENSG00000085760,ENSG00000144118,ENSG00000222014,ENSG00000233087,ENSG00000075886,ENSG00000162980,ENSG00000138430,ENSG00000127824,ENSG00000188042,ENSG00000173540,ENSG00000163938,ENSG00000113966…
GO:MF	protein threonine kinase activity	GO:0106311	0.00105875	2.97521	361	5392	145	18679	ENSG00000067606,ENSG00000198793,ENSG00000175087,ENSG00000086015,ENSG00000162409,ENSG00000116783,ENSG00000142875,ENSG00000152332,ENSG00000008118,ENSG00000136643,ENSG00000116141,ENSG00000154358,ENSG00000143674,ENSG00000117020,ENSG00000134318,ENSG00000205111,ENSG00000171132,ENSG00000115977,ENSG00000172071,ENSG00000169679,ENSG00000198648,ENSG00000198586,ENSG00000081320,ENSG00000072195,ENSG00000115687…
GO:MF	protein serine kinase activity	GO:0106310	0.00105875	2.97521	361	5392	145	18679	ENSG00000067606,ENSG00000198793,ENSG00000175087,ENSG00000086015,ENSG00000162409,ENSG00000116783,ENSG00000142875,ENSG00000152332,ENSG00000008118,ENSG00000136643,ENSG00000116141,ENSG00000154358,ENSG00000143674,ENSG00000117020,ENSG00000134318,ENSG00000205111,ENSG00000171132,ENSG00000115977,ENSG00000172071,ENSG00000169679,ENSG00000198648,ENSG00000198586,ENSG00000081320,ENSG00000072195,ENSG00000115687…
GO:MF	kinase binding	GO:0019900	0.00115614	2.93699	757	5392	276	18679	ENSG00000107404,ENSG00000067606,ENSG00000157933,ENSG00000198793,ENSG00000162545,ENSG00000175793,ENSG00000121905,ENSG00000143093,ENSG00000197852,ENSG00000163399,ENSG00000159164,ENSG00000198400,ENSG00000158773,ENSG00000081721,ENSG00000198821,ENSG00000143153,ENSG00000058668,ENSG00000143473,ENSG00000143507,ENSG00000198626,ENSG00000189292,ENSG00000119185,ENSG00000163026,ENSG00000084764,ENSG00000171150…
GO:MF	guanyl nucleotide binding	GO:0019001	0.00278837	2.55465	402	5392	157	18679	ENSG00000132881,ENSG00000142751,ENSG00000116954,ENSG00000169213,ENSG00000162595,ENSG00000254685,ENSG00000197959,ENSG00000143761,ENSG00000168118,ENSG00000035687,ENSG00000115137,ENSG00000013016,ENSG00000119787,ENSG00000085760,ENSG00000144118,ENSG00000222014,ENSG00000233087,ENSG00000075886,ENSG00000162980,ENSG00000138430,ENSG00000127824,ENSG00000188042,ENSG00000144635,ENSG00000173540,ENSG00000163938…
GO:MF	guanyl ribonucleotide binding	GO:0032561	0.00278837	2.55465	402	5392	157	18679	ENSG00000132881,ENSG00000142751,ENSG00000116954,ENSG00000169213,ENSG00000162595,ENSG00000254685,ENSG00000197959,ENSG00000143761,ENSG00000168118,ENSG00000035687,ENSG00000115137,ENSG00000013016,ENSG00000119787,ENSG00000085760,ENSG00000144118,ENSG00000222014,ENSG00000233087,ENSG00000075886,ENSG00000162980,ENSG00000138430,ENSG00000127824,ENSG00000188042,ENSG00000144635,ENSG00000173540,ENSG00000163938…
GO:MF	protein serine/threonine kinase activity	GO:0004674	0.00289364	2.53856	438	5392	169	18679	ENSG00000067606,ENSG00000198793,ENSG00000175087,ENSG00000086015,ENSG00000162409,ENSG00000116783,ENSG00000142875,ENSG00000152332,ENSG00000008118,ENSG00000136643,ENSG00000116141,ENSG00000154358,ENSG00000143674,ENSG00000117020,ENSG00000134318,ENSG00000205111,ENSG00000171132,ENSG00000115977,ENSG00000172071,ENSG00000169679,ENSG00000123612,ENSG00000198648,ENSG00000198586,ENSG00000081320,ENSG00000072195…
GO:MF	nucleoside-triphosphatase regulator activity	GO:0060589	0.00318723	2.49659	526	5392	198	18679	ENSG00000171680,ENSG00000076864,ENSG00000130766,ENSG00000084070,ENSG00000070785,ENSG00000177606,ENSG00000162616,ENSG00000134215,ENSG00000198837,ENSG00000132694,ENSG00000117152,ENSG00000143153,ENSG00000152061,ENSG00000075391,ENSG00000116191,ENSG00000143333,ENSG00000135824,ENSG00000116741,ENSG00000213047,ENSG00000183155,ENSG00000154358,ENSG00000168118,ENSG00000116991,ENSG00000182901,ENSG00000203668…
GO:MF	postsynaptic neurotransmitter receptor activity	GO:0098960	0.00391137	2.40767	63	5392	35	18679	ENSG00000187730,ENSG00000163873,ENSG00000160716,ENSG00000109158,ENSG00000152208,ENSG00000109738,ENSG00000155511,ENSG00000145864,ENSG00000145863,ENSG00000022355,ENSG00000113327,ENSG00000184845,ENSG00000204681,ENSG00000164418,ENSG00000152822,ENSG00000181072,ENSG00000120903,ENSG00000198785,ENSG00000180720,ENSG00000168539,ENSG00000168959,ENSG00000149295,ENSG00000149403,ENSG00000186297,ENSG00000182256…
GO:MF	ephrin receptor activity	GO:0005003	0.004174	2.37945	19	5392	15	18679	ENSG00000070886,ENSG00000133216,ENSG00000183317,ENSG00000143590,ENSG00000198400,ENSG00000116106,ENSG00000044524,ENSG00000080224,ENSG00000154928,ENSG00000182580,ENSG00000145242,ENSG00000135333,ENSG00000106123,ENSG00000140538,ENSG00000108947
GO:MF	ubiquitin-like protein transferase activity	GO:0019787	0.00948481	2.02297	458	5392	173	18679	ENSG00000130939,ENSG00000116661,ENSG00000132879,ENSG00000090432,ENSG00000130772,ENSG00000116514,ENSG00000126107,ENSG00000123091,ENSG00000160714,ENSG00000143207,ENSG00000121481,ENSG00000077152,ENSG00000082512,ENSG00000143476,ENSG00000162931,ENSG00000168159,ENSG00000162722,ENSG00000138100,ENSG00000115392,ENSG00000197329,ENSG00000176407,ENSG00000153561,ENSG00000213337,ENSG00000196151,ENSG00000144583…
GO:MF	ligand-gated channel activity	GO:0022834	0.0102334	1.98998	141	5392	64	18679	ENSG00000187730,ENSG00000163873,ENSG00000160716,ENSG00000162728,ENSG00000135750,ENSG00000198626,ENSG00000119782,ENSG00000162989,ENSG00000150995,ENSG00000109158,ENSG00000152208,ENSG00000109738,ENSG00000120251,ENSG00000145451,ENSG00000164588,ENSG00000197043,ENSG00000155511,ENSG00000145864,ENSG00000145863,ENSG00000022355,ENSG00000113327,ENSG00000164418,ENSG00000055118,ENSG00000120899,ENSG00000120903…
GO:MF	ligand-gated ion channel activity	GO:0015276	0.0102334	1.98998	141	5392	64	18679	ENSG00000187730,ENSG00000163873,ENSG00000160716,ENSG00000162728,ENSG00000135750,ENSG00000198626,ENSG00000119782,ENSG00000162989,ENSG00000150995,ENSG00000109158,ENSG00000152208,ENSG00000109738,ENSG00000120251,ENSG00000145451,ENSG00000164588,ENSG00000197043,ENSG00000155511,ENSG00000145864,ENSG00000145863,ENSG00000022355,ENSG00000113327,ENSG00000164418,ENSG00000055118,ENSG00000120899,ENSG00000120903…
GO:MF	protein kinase binding	GO:0019901	0.0110206	1.9578	677	5392	244	18679	ENSG00000107404,ENSG00000067606,ENSG00000157933,ENSG00000198793,ENSG00000162545,ENSG00000175793,ENSG00000143093,ENSG00000197852,ENSG00000163399,ENSG00000159164,ENSG00000158773,ENSG00000198821,ENSG00000143153,ENSG00000058668,ENSG00000143473,ENSG00000143507,ENSG00000198626,ENSG00000189292,ENSG00000119185,ENSG00000084764,ENSG00000171150,ENSG00000095002,ENSG00000119866,ENSG00000198369,ENSG00000075340…
GO:MF	ubiquitin-protein transferase activity	GO:0004842	0.0112278	1.9497	435	5392	165	18679	ENSG00000130939,ENSG00000116661,ENSG00000132879,ENSG00000090432,ENSG00000130772,ENSG00000116514,ENSG00000126107,ENSG00000123091,ENSG00000160714,ENSG00000143207,ENSG00000121481,ENSG00000077152,ENSG00000082512,ENSG00000143476,ENSG00000162931,ENSG00000168159,ENSG00000162722,ENSG00000138100,ENSG00000115392,ENSG00000197329,ENSG00000176407,ENSG00000153561,ENSG00000213337,ENSG00000196151,ENSG00000144583…
GO:MF	extracellular ligand-gated ion channel activity	GO:0005230	0.0122129	1.91318	73	5392	38	18679	ENSG00000187730,ENSG00000163873,ENSG00000160716,ENSG00000109158,ENSG00000152208,ENSG00000109738,ENSG00000120251,ENSG00000145451,ENSG00000155511,ENSG00000145864,ENSG00000145863,ENSG00000022355,ENSG00000113327,ENSG00000164418,ENSG00000120899,ENSG00000120903,ENSG00000198785,ENSG00000176884,ENSG00000152578,ENSG00000149403,ENSG00000273079,ENSG00000166206,ENSG00000186297,ENSG00000182256,ENSG00000175344…
GO:MF	pyrophosphatase activity	GO:0016462	0.0139206	1.85634	482	5392	180	18679	ENSG00000078369,ENSG00000132881,ENSG00000117245,ENSG00000076864,ENSG00000142751,ENSG00000116954,ENSG00000142945,ENSG00000169213,ENSG00000162595,ENSG00000181656,ENSG00000143363,ENSG00000197959,ENSG00000135829,ENSG00000116852,ENSG00000168118,ENSG00000135778,ENSG00000115137,ENSG00000084731,ENSG00000119787,ENSG00000085760,ENSG00000144118,ENSG00000222014,ENSG00000233087,ENSG00000075886,ENSG00000168280…
GO:MF	delayed rectifier potassium channel activity	GO:0005251	0.0165415	1.78142	33	5392	21	18679	ENSG00000117013,ENSG00000116396,ENSG00000177301,ENSG00000177272,ENSG00000143473,ENSG00000170745,ENSG00000185760,ENSG00000055118,ENSG00000184156,ENSG00000129159,ENSG00000182255,ENSG00000111262,ENSG00000130037,ENSG00000166006,ENSG00000178342,ENSG00000131398,ENSG00000124134,ENSG00000158445,ENSG00000026559,ENSG00000075043,ENSG00000159197
GO:MF	hydrolase activity, acting on acid anhydrides, in phosphorus-containing anhydrides	GO:0016818	0.0178435	1.74852	493	5392	183	18679	ENSG00000078369,ENSG00000132881,ENSG00000117245,ENSG00000076864,ENSG00000142751,ENSG00000116954,ENSG00000142945,ENSG00000169213,ENSG00000162595,ENSG00000181656,ENSG00000143363,ENSG00000197959,ENSG00000135829,ENSG00000116852,ENSG00000168118,ENSG00000135778,ENSG00000115137,ENSG00000084731,ENSG00000119787,ENSG00000085760,ENSG00000144118,ENSG00000222014,ENSG00000233087,ENSG00000075886,ENSG00000168280…
GO:MF	GTPase regulator activity	GO:0030695	0.0182182	1.73949	484	5392	180	18679	ENSG00000171680,ENSG00000076864,ENSG00000130766,ENSG00000084070,ENSG00000070785,ENSG00000177606,ENSG00000134215,ENSG00000198837,ENSG00000132694,ENSG00000117152,ENSG00000152061,ENSG00000075391,ENSG00000116191,ENSG00000143333,ENSG00000135824,ENSG00000116741,ENSG00000213047,ENSG00000183155,ENSG00000154358,ENSG00000116991,ENSG00000182901,ENSG00000203668,ENSG00000175137,ENSG00000119185,ENSG00000214694…
GO:MF	hydrolase activity, acting on acid anhydrides	GO:0016817	0.020353	1.69137	494	5392	183	18679	ENSG00000078369,ENSG00000132881,ENSG00000117245,ENSG00000076864,ENSG00000142751,ENSG00000116954,ENSG00000142945,ENSG00000169213,ENSG00000162595,ENSG00000181656,ENSG00000143363,ENSG00000197959,ENSG00000135829,ENSG00000116852,ENSG00000168118,ENSG00000135778,ENSG00000115137,ENSG00000084731,ENSG00000119787,ENSG00000085760,ENSG00000144118,ENSG00000222014,ENSG00000233087,ENSG00000075886,ENSG00000168280…
GO:MF	phosphatidylinositol phosphate 4-phosphatase activity	GO:0034596	0.0228742	1.64065	8	5392	8	18679	ENSG00000040933,ENSG00000211456,ENSG00000109452,ENSG00000112367,ENSG00000155099,ENSG00000198825,ENSG00000165782,ENSG00000159082
GO:MF	phosphoric ester hydrolase activity	GO:0042578	0.0243607	1.61331	377	5392	144	18679	ENSG00000160075,ENSG00000078369,ENSG00000130768,ENSG00000060656,ENSG00000116981,ENSG00000116675,ENSG00000122484,ENSG00000117598,ENSG00000117600,ENSG00000122477,ENSG00000155367,ENSG00000163399,ENSG00000143363,ENSG00000081721,ENSG00000162813,ENSG00000143507,ENSG00000138032,ENSG00000221823,ENSG00000158050,ENSG00000040933,ENSG00000088179,ENSG00000115252,ENSG00000162999,ENSG00000115556,ENSG00000054356…
GO:MF	protein kinase activity	GO:0004672	0.0254295	1.59466	585	5392	212	18679	ENSG00000067606,ENSG00000198793,ENSG00000070886,ENSG00000133216,ENSG00000175087,ENSG00000183317,ENSG00000086015,ENSG00000162409,ENSG00000162434,ENSG00000116783,ENSG00000142875,ENSG00000143590,ENSG00000198400,ENSG00000152332,ENSG00000000457,ENSG00000143322,ENSG00000008118,ENSG00000136643,ENSG00000116141,ENSG00000154358,ENSG00000143674,ENSG00000117020,ENSG00000134318,ENSG00000115216,ENSG00000171094…
GO:MF	calcium ion binding	GO:0005509	0.0282932	1.54832	723	5392	256	18679	ENSG00000169885,ENSG00000171603,ENSG00000142634,ENSG00000117643,ENSG00000121905,ENSG00000116983,ENSG00000085832,ENSG00000157193,ENSG00000203965,ENSG00000085491,ENSG00000143126,ENSG00000134207,ENSG00000198162,ENSG00000143631,ENSG00000132718,ENSG00000143318,ENSG00000198216,ENSG00000143858,ENSG00000077522,ENSG00000198626,ENSG00000115705,ENSG00000115756,ENSG00000163032,ENSG00000115155,ENSG00000138028…
GO:MF	neurotransmitter receptor activity involved in regulation of postsynaptic membrane potential	GO:0099529	0.0310961	1.50729	48	5392	27	18679	ENSG00000187730,ENSG00000163873,ENSG00000160716,ENSG00000109158,ENSG00000152208,ENSG00000109738,ENSG00000155511,ENSG00000145864,ENSG00000145863,ENSG00000022355,ENSG00000113327,ENSG00000204681,ENSG00000164418,ENSG00000120903,ENSG00000198785,ENSG00000168539,ENSG00000149403,ENSG00000186297,ENSG00000182256,ENSG00000175344,ENSG00000169684,ENSG00000080644,ENSG00000105737,ENSG00000101204,ENSG00000171189…
GO:MF	structural constituent of synapse	GO:0098918	0.0320682	1.49392	19	5392	14	18679	ENSG00000197959,ENSG00000164061,ENSG00000187672,ENSG00000186472,ENSG00000277586,ENSG00000148798,ENSG00000173898,ENSG00000082805,ENSG00000139220,ENSG00000072110,ENSG00000108852,ENSG00000100285,ENSG00000251322,ENSG00000082458
GO:MF	protein-macromolecule adaptor activity	GO:0030674	0.034455	1.46275	272	5392	108	18679	ENSG00000090020,ENSG00000058804,ENSG00000064703,ENSG00000265808,ENSG00000174827,ENSG00000143153,ENSG00000135823,ENSG00000143740,ENSG00000162931,ENSG00000071051,ENSG00000115290,ENSG00000162999,ENSG00000138443,ENSG00000124006,ENSG00000169047,ENSG00000144596,ENSG00000178750,ENSG00000114547,ENSG00000158092,ENSG00000069849,ENSG00000169251,ENSG00000161203,ENSG00000138757,ENSG00000145362,ENSG00000172403…
GO:MF	sodium ion transmembrane transporter activity	GO:0015081	0.0376204	1.42458	146	5392	64	18679	ENSG00000090020,ENSG00000163873,ENSG00000117834,ENSG00000163399,ENSG00000143630,ENSG00000143153,ENSG00000135750,ENSG00000183023,ENSG00000158158,ENSG00000115616,ENSG00000144136,ENSG00000144290,ENSG00000153253,ENSG00000136531,ENSG00000144285,ENSG00000169432,ENSG00000136546,ENSG00000157103,ENSG00000183873,ENSG00000163817,ENSG00000069849,ENSG00000145248,ENSG00000164038,ENSG00000066230,ENSG00000164588…
GO:MF	calmodulin binding	GO:0005516	0.040566	1.39184	203	5392	84	18679	ENSG00000090020,ENSG00000159023,ENSG00000117013,ENSG00000117152,ENSG00000143333,ENSG00000116741,ENSG00000118200,ENSG00000058668,ENSG00000008118,ENSG00000143473,ENSG00000154358,ENSG00000198626,ENSG00000183023,ENSG00000221823,ENSG00000075340,ENSG00000115252,ENSG00000078018,ENSG00000157087,ENSG00000153558,ENSG00000172995,ENSG00000183873,ENSG00000164076,ENSG00000172020,ENSG00000173226,ENSG00000138814…
GO:MF	heat shock protein binding	GO:0031072	0.0413019	1.38403	127	5392	57	18679	ENSG00000158286,ENSG00000243725,ENSG00000143919,ENSG00000172071,ENSG00000170485,ENSG00000118260,ENSG00000125046,ENSG00000197386,ENSG00000145335,ENSG00000061918,ENSG00000171497,ENSG00000170464,ENSG00000113580,ENSG00000204463,ENSG00000204390,ENSG00000096384,ENSG00000196591,ENSG00000185345,ENSG00000105953,ENSG00000106683,ENSG00000105821,ENSG00000164885,ENSG00000105993,ENSG00000156735,ENSG00000086061…
GO:MF	tRNA binding	GO:0000049	0.0475709	1.32266	74	5392	37	18679	ENSG00000134684,ENSG00000196449,ENSG00000031698,ENSG00000117593,ENSG00000067704,ENSG00000138385,ENSG00000178149,ENSG00000178694,ENSG00000144895,ENSG00000113407,ENSG00000113048,ENSG00000113643,ENSG00000145982,ENSG00000124571,ENSG00000106246,ENSG00000250305,ENSG00000134014,ENSG00000196305,ENSG00000179988,ENSG00000110619,ENSG00000132740,ENSG00000137760,ENSG00000165526,ENSG00000180574,ENSG00000139131…
GO:MF	high voltage-gated calcium channel activity	GO:0008331	0.0488442	1.31119	10	5392	9	18679	ENSG00000182389,ENSG00000157388,ENSG00000148408,ENSG00000165995,ENSG00000151067,ENSG00000167535,ENSG00000067191,ENSG00000141837,ENSG00000102001
GO:BP	synaptic signaling	GO:0099536	2.7014e-67	66.5684	747	5127	439	18123	ENSG00000107404,ENSG00000078369,ENSG00000187730,ENSG00000067606,ENSG00000158109,ENSG00000171603,ENSG00000241563,ENSG00000198793,ENSG00000133216,ENSG00000179546,ENSG00000121764,ENSG00000116544,ENSG00000020129,ENSG00000163873,ENSG00000117016,ENSG00000162374,ENSG00000169213,ENSG00000157193,ENSG00000142875,ENSG00000162631,ENSG00000116396,ENSG00000134207,ENSG00000134259,ENSG00000159164,ENSG00000160716…
GO:BP	chemical synaptic transmission	GO:0007268	2.27918e-66	65.6422	713	5127	423	18123	ENSG00000107404,ENSG00000187730,ENSG00000067606,ENSG00000158109,ENSG00000171603,ENSG00000241563,ENSG00000198793,ENSG00000133216,ENSG00000179546,ENSG00000121764,ENSG00000116544,ENSG00000020129,ENSG00000163873,ENSG00000117016,ENSG00000162374,ENSG00000169213,ENSG00000157193,ENSG00000142875,ENSG00000162631,ENSG00000116396,ENSG00000134207,ENSG00000134259,ENSG00000159164,ENSG00000160716,ENSG00000132718…
GO:BP	anterograde trans-synaptic signaling	GO:0098916	2.27918e-66	65.6422	713	5127	423	18123	ENSG00000107404,ENSG00000187730,ENSG00000067606,ENSG00000158109,ENSG00000171603,ENSG00000241563,ENSG00000198793,ENSG00000133216,ENSG00000179546,ENSG00000121764,ENSG00000116544,ENSG00000020129,ENSG00000163873,ENSG00000117016,ENSG00000162374,ENSG00000169213,ENSG00000157193,ENSG00000142875,ENSG00000162631,ENSG00000116396,ENSG00000134207,ENSG00000134259,ENSG00000159164,ENSG00000160716,ENSG00000132718…
GO:BP	trans-synaptic signaling	GO:0099537	3.9577e-66	65.4026	721	5127	426	18123	ENSG00000107404,ENSG00000187730,ENSG00000067606,ENSG00000158109,ENSG00000171603,ENSG00000241563,ENSG00000198793,ENSG00000133216,ENSG00000179546,ENSG00000121764,ENSG00000116544,ENSG00000020129,ENSG00000163873,ENSG00000117016,ENSG00000162374,ENSG00000169213,ENSG00000157193,ENSG00000142875,ENSG00000162631,ENSG00000116396,ENSG00000134207,ENSG00000134259,ENSG00000159164,ENSG00000160716,ENSG00000132718…
GO:BP	modulation of chemical synaptic transmission	GO:0050804	1.95087e-45	44.7098	434	5127	268	18123	ENSG00000107404,ENSG00000067606,ENSG00000158109,ENSG00000171603,ENSG00000198793,ENSG00000133216,ENSG00000116544,ENSG00000020129,ENSG00000163873,ENSG00000117016,ENSG00000162374,ENSG00000157193,ENSG00000162631,ENSG00000134259,ENSG00000160716,ENSG00000132718,ENSG00000198400,ENSG00000117152,ENSG00000170498,ENSG00000143740,ENSG00000143761,ENSG00000138078,ENSG00000171132,ENSG00000179915,ENSG00000221823…
GO:BP	regulation of trans-synaptic signaling	GO:0099177	3.69256e-45	44.4327	435	5127	268	18123	ENSG00000107404,ENSG00000067606,ENSG00000158109,ENSG00000171603,ENSG00000198793,ENSG00000133216,ENSG00000116544,ENSG00000020129,ENSG00000163873,ENSG00000117016,ENSG00000162374,ENSG00000157193,ENSG00000162631,ENSG00000134259,ENSG00000160716,ENSG00000132718,ENSG00000198400,ENSG00000117152,ENSG00000170498,ENSG00000143740,ENSG00000143761,ENSG00000138078,ENSG00000171132,ENSG00000179915,ENSG00000221823…
GO:BP	nervous system development	GO:0007399	6.25008e-45	44.2041	2484	5127	1016	18123	ENSG00000107404,ENSG00000067606,ENSG00000157933,ENSG00000197921,ENSG00000131697,ENSG00000116254,ENSG00000171603,ENSG00000198793,ENSG00000204624,ENSG00000162490,ENSG00000177000,ENSG00000158747,ENSG00000090432,ENSG00000076864,ENSG00000162552,ENSG00000070886,ENSG00000133216,ENSG00000004487,ENSG00000169641,ENSG00000204178,ENSG00000117632,ENSG00000253368,ENSG00000198492,ENSG00000121753,ENSG00000121905…
GO:BP	cell-cell signaling	GO:0007267	1.67854e-38	37.7751	1735	5127	741	18123	ENSG00000107404,ENSG00000078369,ENSG00000187730,ENSG00000067606,ENSG00000157933,ENSG00000158109,ENSG00000131697,ENSG00000158286,ENSG00000171603,ENSG00000241563,ENSG00000198793,ENSG00000162490,ENSG00000175206,ENSG00000162545,ENSG00000162552,ENSG00000133216,ENSG00000179546,ENSG00000060656,ENSG00000121764,ENSG00000189280,ENSG00000188910,ENSG00000116544,ENSG00000020129,ENSG00000126067,ENSG00000163873…
GO:BP	neuron differentiation	GO:0030182	2.74513e-36	35.5614	1427	5127	627	18123	ENSG00000107404,ENSG00000067606,ENSG00000197921,ENSG00000131697,ENSG00000116254,ENSG00000198793,ENSG00000204624,ENSG00000162490,ENSG00000158747,ENSG00000090432,ENSG00000076864,ENSG00000162552,ENSG00000070886,ENSG00000133216,ENSG00000004487,ENSG00000117632,ENSG00000020129,ENSG00000183317,ENSG00000116990,ENSG00000204060,ENSG00000186094,ENSG00000162374,ENSG00000157193,ENSG00000173406,ENSG00000172260…
GO:BP	neuron development	GO:0048666	2.38039e-35	34.6234	1159	5127	529	18123	ENSG00000107404,ENSG00000067606,ENSG00000197921,ENSG00000131697,ENSG00000198793,ENSG00000162490,ENSG00000158747,ENSG00000090432,ENSG00000076864,ENSG00000070886,ENSG00000133216,ENSG00000004487,ENSG00000117632,ENSG00000020129,ENSG00000183317,ENSG00000204060,ENSG00000186094,ENSG00000162374,ENSG00000157193,ENSG00000173406,ENSG00000172260,ENSG00000162614,ENSG00000117598,ENSG00000117600,ENSG00000118733…
GO:BP	generation of neurons	GO:0048699	1.99933e-34	33.6991	1576	5127	673	18123	ENSG00000107404,ENSG00000067606,ENSG00000157933,ENSG00000197921,ENSG00000131697,ENSG00000116254,ENSG00000198793,ENSG00000204624,ENSG00000162490,ENSG00000158747,ENSG00000090432,ENSG00000076864,ENSG00000162552,ENSG00000070886,ENSG00000133216,ENSG00000004487,ENSG00000117632,ENSG00000198492,ENSG00000020129,ENSG00000183317,ENSG00000116990,ENSG00000204060,ENSG00000186094,ENSG00000162374,ENSG00000157193…
GO:BP	neuron projection development	GO:0031175	3.58079e-33	32.446	1021	5127	473	18123	ENSG00000107404,ENSG00000067606,ENSG00000197921,ENSG00000198793,ENSG00000162490,ENSG00000158747,ENSG00000090432,ENSG00000076864,ENSG00000070886,ENSG00000133216,ENSG00000004487,ENSG00000117632,ENSG00000020129,ENSG00000183317,ENSG00000204060,ENSG00000162374,ENSG00000157193,ENSG00000173406,ENSG00000172260,ENSG00000162614,ENSG00000117598,ENSG00000117600,ENSG00000162631,ENSG00000143126,ENSG00000181754…
GO:BP	neurogenesis	GO:0022008	2.14593e-32	31.6684	1698	5127	708	18123	ENSG00000107404,ENSG00000067606,ENSG00000157933,ENSG00000197921,ENSG00000131697,ENSG00000116254,ENSG00000198793,ENSG00000204624,ENSG00000162490,ENSG00000158747,ENSG00000090432,ENSG00000076864,ENSG00000162552,ENSG00000070886,ENSG00000133216,ENSG00000004487,ENSG00000117632,ENSG00000198492,ENSG00000020129,ENSG00000183317,ENSG00000185668,ENSG00000116990,ENSG00000204060,ENSG00000070785,ENSG00000186094…
GO:BP	neurotransmitter secretion	GO:0007269	2.42839e-31	30.6147	154	5127	117	18123	ENSG00000107404,ENSG00000117016,ENSG00000134207,ENSG00000159164,ENSG00000132718,ENSG00000143858,ENSG00000143740,ENSG00000115155,ENSG00000138078,ENSG00000179915,ENSG00000115839,ENSG00000128683,ENSG00000127838,ENSG00000157152,ENSG00000114646,ENSG00000187672,ENSG00000163618,ENSG00000178750,ENSG00000082701,ENSG00000145087,ENSG00000169760,ENSG00000168993,ENSG00000138744,ENSG00000145335,ENSG00000081189…
GO:BP	signal release from synapse	GO:0099643	2.42839e-31	30.6147	154	5127	117	18123	ENSG00000107404,ENSG00000117016,ENSG00000134207,ENSG00000159164,ENSG00000132718,ENSG00000143858,ENSG00000143740,ENSG00000115155,ENSG00000138078,ENSG00000179915,ENSG00000115839,ENSG00000128683,ENSG00000127838,ENSG00000157152,ENSG00000114646,ENSG00000187672,ENSG00000163618,ENSG00000178750,ENSG00000082701,ENSG00000145087,ENSG00000169760,ENSG00000168993,ENSG00000138744,ENSG00000145335,ENSG00000081189…
GO:BP	neuron projection morphogenesis	GO:0048812	1.76299e-29	28.7538	670	5127	333	18123	ENSG00000107404,ENSG00000067606,ENSG00000162490,ENSG00000158747,ENSG00000090432,ENSG00000076864,ENSG00000070886,ENSG00000133216,ENSG00000117632,ENSG00000183317,ENSG00000162374,ENSG00000157193,ENSG00000173406,ENSG00000162614,ENSG00000117600,ENSG00000162631,ENSG00000143126,ENSG00000181754,ENSG00000134259,ENSG00000143434,ENSG00000160716,ENSG00000143590,ENSG00000196189,ENSG00000143320,ENSG00000198400…
GO:BP	cell projection morphogenesis	GO:0048858	1.01464e-28	27.9937	688	5127	338	18123	ENSG00000107404,ENSG00000067606,ENSG00000162490,ENSG00000158747,ENSG00000090432,ENSG00000076864,ENSG00000070886,ENSG00000133216,ENSG00000117632,ENSG00000183317,ENSG00000162374,ENSG00000157193,ENSG00000173406,ENSG00000162614,ENSG00000117600,ENSG00000162631,ENSG00000143126,ENSG00000181754,ENSG00000134259,ENSG00000143434,ENSG00000160716,ENSG00000143590,ENSG00000196189,ENSG00000143320,ENSG00000198400…
GO:BP	plasma membrane bounded cell projection morphogenesis	GO:0120039	1.6013e-28	27.7955	684	5127	336	18123	ENSG00000107404,ENSG00000067606,ENSG00000162490,ENSG00000158747,ENSG00000090432,ENSG00000076864,ENSG00000070886,ENSG00000133216,ENSG00000117632,ENSG00000183317,ENSG00000162374,ENSG00000157193,ENSG00000173406,ENSG00000162614,ENSG00000117600,ENSG00000162631,ENSG00000143126,ENSG00000181754,ENSG00000134259,ENSG00000143434,ENSG00000160716,ENSG00000143590,ENSG00000196189,ENSG00000143320,ENSG00000198400…
GO:BP	vesicle-mediated transport in synapse	GO:0099003	4.57449e-28	27.3397	211	5127	141	18123	ENSG00000107404,ENSG00000171603,ENSG00000121905,ENSG00000117016,ENSG00000085832,ENSG00000169213,ENSG00000116675,ENSG00000134207,ENSG00000159164,ENSG00000132718,ENSG00000117533,ENSG00000197959,ENSG00000143858,ENSG00000143740,ENSG00000115155,ENSG00000138078,ENSG00000179915,ENSG00000221823,ENSG00000115839,ENSG00000091428,ENSG00000157152,ENSG00000144596,ENSG00000168036,ENSG00000114646,ENSG00000164061…
GO:BP	cell part morphogenesis	GO:0032990	2.36493e-27	26.6262	705	5127	341	18123	ENSG00000107404,ENSG00000067606,ENSG00000162490,ENSG00000158747,ENSG00000090432,ENSG00000076864,ENSG00000070886,ENSG00000133216,ENSG00000117632,ENSG00000183317,ENSG00000162374,ENSG00000157193,ENSG00000173406,ENSG00000162614,ENSG00000117600,ENSG00000162631,ENSG00000143126,ENSG00000181754,ENSG00000134259,ENSG00000143434,ENSG00000160716,ENSG00000143590,ENSG00000196189,ENSG00000143320,ENSG00000198400…
GO:BP	synapse organization	GO:0050808	2.34161e-26	25.6305	432	5127	233	18123	ENSG00000107404,ENSG00000171603,ENSG00000133216,ENSG00000116544,ENSG00000157193,ENSG00000117114,ENSG00000162631,ENSG00000181754,ENSG00000160716,ENSG00000196189,ENSG00000198400,ENSG00000085552,ENSG00000198929,ENSG00000197959,ENSG00000143847,ENSG00000143761,ENSG00000179915,ENSG00000075340,ENSG00000204843,ENSG00000176204,ENSG00000066032,ENSG00000162951,ENSG00000182389,ENSG00000170396,ENSG00000003393…
GO:BP	synaptic vesicle cycle	GO:0099504	8.27319e-26	25.0823	190	5127	128	18123	ENSG00000107404,ENSG00000117016,ENSG00000169213,ENSG00000116675,ENSG00000134207,ENSG00000159164,ENSG00000132718,ENSG00000117533,ENSG00000197959,ENSG00000143858,ENSG00000143740,ENSG00000115155,ENSG00000138078,ENSG00000179915,ENSG00000115839,ENSG00000091428,ENSG00000157152,ENSG00000168036,ENSG00000114646,ENSG00000164061,ENSG00000187672,ENSG00000163618,ENSG00000178750,ENSG00000082701,ENSG00000145087…
GO:BP	neurotransmitter transport	GO:0006836	1.29045e-25	24.8893	223	5127	143	18123	ENSG00000107404,ENSG00000117016,ENSG00000169213,ENSG00000197106,ENSG00000134207,ENSG00000159164,ENSG00000132718,ENSG00000143858,ENSG00000143847,ENSG00000143740,ENSG00000115155,ENSG00000138078,ENSG00000179915,ENSG00000115839,ENSG00000128683,ENSG00000115419,ENSG00000127838,ENSG00000132326,ENSG00000157103,ENSG00000157152,ENSG00000114646,ENSG00000187672,ENSG00000163618,ENSG00000178750,ENSG00000082701…
GO:BP	cell morphogenesis involved in neuron differentiation	GO:0048667	1.00379e-23	22.9984	607	5127	295	18123	ENSG00000107404,ENSG00000162490,ENSG00000076864,ENSG00000070886,ENSG00000133216,ENSG00000117632,ENSG00000183317,ENSG00000162374,ENSG00000157193,ENSG00000173406,ENSG00000162614,ENSG00000117600,ENSG00000162631,ENSG00000143126,ENSG00000181754,ENSG00000134259,ENSG00000143434,ENSG00000160716,ENSG00000143590,ENSG00000196189,ENSG00000143320,ENSG00000198400,ENSG00000085552,ENSG00000197959,ENSG00000058085…
GO:BP	synaptic vesicle exocytosis	GO:0016079	1.49791e-23	22.8245	111	5127	86	18123	ENSG00000107404,ENSG00000117016,ENSG00000134207,ENSG00000159164,ENSG00000143858,ENSG00000143740,ENSG00000115155,ENSG00000138078,ENSG00000115839,ENSG00000114646,ENSG00000187672,ENSG00000163618,ENSG00000178750,ENSG00000082701,ENSG00000145087,ENSG00000169760,ENSG00000168993,ENSG00000145335,ENSG00000145920,ENSG00000047579,ENSG00000079841,ENSG00000135312,ENSG00000118432,ENSG00000164506,ENSG00000164742…
GO:BP	cellular component morphogenesis	GO:0032989	5.73976e-23	22.2411	797	5127	363	18123	ENSG00000107404,ENSG00000067606,ENSG00000162490,ENSG00000158747,ENSG00000090432,ENSG00000076864,ENSG00000070886,ENSG00000133216,ENSG00000117632,ENSG00000183317,ENSG00000162374,ENSG00000157193,ENSG00000173406,ENSG00000162614,ENSG00000117600,ENSG00000156875,ENSG00000162631,ENSG00000143126,ENSG00000181754,ENSG00000134259,ENSG00000143434,ENSG00000160716,ENSG00000143590,ENSG00000196189,ENSG00000143320…
GO:BP	regulation of neurotransmitter levels	GO:0001505	6.01943e-23	22.2204	221	5127	138	18123	ENSG00000107404,ENSG00000117016,ENSG00000169213,ENSG00000134207,ENSG00000159164,ENSG00000132718,ENSG00000143858,ENSG00000143740,ENSG00000115155,ENSG00000138078,ENSG00000179915,ENSG00000115839,ENSG00000128683,ENSG00000127838,ENSG00000132326,ENSG00000157103,ENSG00000157152,ENSG00000114646,ENSG00000187672,ENSG00000163618,ENSG00000178750,ENSG00000082701,ENSG00000145087,ENSG00000169760,ENSG00000168993…
GO:BP	plasma membrane bounded cell projection organization	GO:0120036	1.87093e-22	21.7279	1596	5127	637	18123	ENSG00000107404,ENSG00000067606,ENSG00000197921,ENSG00000131697,ENSG00000187017,ENSG00000198793,ENSG00000162490,ENSG00000132881,ENSG00000158747,ENSG00000090432,ENSG00000117245,ENSG00000076864,ENSG00000070886,ENSG00000133216,ENSG00000004487,ENSG00000117632,ENSG00000020129,ENSG00000183317,ENSG00000174574,ENSG00000204060,ENSG00000162374,ENSG00000157193,ENSG00000173406,ENSG00000172260,ENSG00000162614…
GO:BP	behavior	GO:0007610	4.63864e-22	21.3336	589	5127	284	18123	ENSG00000107404,ENSG00000067606,ENSG00000131697,ENSG00000198793,ENSG00000133216,ENSG00000179546,ENSG00000116329,ENSG00000121764,ENSG00000204060,ENSG00000162374,ENSG00000173406,ENSG00000177606,ENSG00000118473,ENSG00000172260,ENSG00000181656,ENSG00000177301,ENSG00000134259,ENSG00000177551,ENSG00000159208,ENSG00000160714,ENSG00000160716,ENSG00000177628,ENSG00000132718,ENSG00000198400,ENSG00000152092…
GO:BP	regulation of synaptic plasticity	GO:0048167	6.26327e-22	21.2032	189	5127	122	18123	ENSG00000067606,ENSG00000133216,ENSG00000020129,ENSG00000117016,ENSG00000143740,ENSG00000143761,ENSG00000115839,ENSG00000144290,ENSG00000118260,ENSG00000116106,ENSG00000144619,ENSG00000187672,ENSG00000082701,ENSG00000196549,ENSG00000169760,ENSG00000168824,ENSG00000157404,ENSG00000145335,ENSG00000152208,ENSG00000109756,ENSG00000145632,ENSG00000131711,ENSG00000081189,ENSG00000175471,ENSG00000146006…
GO:BP	cell projection organization	GO:0030030	3.8109e-21	20.419	1636	5127	645	18123	ENSG00000107404,ENSG00000067606,ENSG00000197921,ENSG00000131697,ENSG00000187017,ENSG00000198793,ENSG00000162490,ENSG00000132881,ENSG00000158747,ENSG00000090432,ENSG00000117245,ENSG00000076864,ENSG00000070886,ENSG00000133216,ENSG00000004487,ENSG00000117632,ENSG00000020129,ENSG00000183317,ENSG00000174574,ENSG00000204060,ENSG00000162374,ENSG00000157193,ENSG00000173406,ENSG00000172260,ENSG00000162614…
GO:BP	regulation of ion transmembrane transport	GO:0034765	1.76798e-20	19.7525	520	5127	254	18123	ENSG00000078369,ENSG00000069424,ENSG00000158286,ENSG00000198793,ENSG00000175206,ENSG00000162494,ENSG00000186510,ENSG00000133216,ENSG00000090020,ENSG00000121905,ENSG00000117013,ENSG00000181754,ENSG00000116396,ENSG00000177301,ENSG00000177272,ENSG00000171385,ENSG00000174827,ENSG00000143630,ENSG00000162728,ENSG00000143318,ENSG00000198929,ENSG00000117152,ENSG00000143184,ENSG00000143153,ENSG00000198216…
GO:BP	dendrite development	GO:0016358	2.44301e-20	19.6121	247	5127	145	18123	ENSG00000107404,ENSG00000198793,ENSG00000133216,ENSG00000204060,ENSG00000162374,ENSG00000157193,ENSG00000173406,ENSG00000143126,ENSG00000171943,ENSG00000160716,ENSG00000085552,ENSG00000197959,ENSG00000058085,ENSG00000118200,ENSG00000116141,ENSG00000143761,ENSG00000171094,ENSG00000119866,ENSG00000066032,ENSG00000071051,ENSG00000138443,ENSG00000118263,ENSG00000078018,ENSG00000124006,ENSG00000116106…
GO:BP	regulation of transport	GO:0051049	2.8424e-20	19.5463	1839	5127	708	18123	ENSG00000107404,ENSG00000078369,ENSG00000067606,ENSG00000069424,ENSG00000158286,ENSG00000198793,ENSG00000204624,ENSG00000175206,ENSG00000120937,ENSG00000162494,ENSG00000186510,ENSG00000132881,ENSG00000159363,ENSG00000162545,ENSG00000090432,ENSG00000133216,ENSG00000175793,ENSG00000090020,ENSG00000116329,ENSG00000159023,ENSG00000121769,ENSG00000121905,ENSG00000196449,ENSG00000117016,ENSG00000117013…
GO:BP	regulation of membrane potential	GO:0042391	3.50163e-20	19.4557	446	5127	225	18123	ENSG00000107404,ENSG00000187730,ENSG00000067606,ENSG00000069424,ENSG00000158286,ENSG00000175206,ENSG00000090432,ENSG00000090020,ENSG00000126709,ENSG00000116329,ENSG00000163873,ENSG00000117016,ENSG00000177606,ENSG00000181656,ENSG00000177301,ENSG00000171385,ENSG00000163399,ENSG00000213190,ENSG00000160716,ENSG00000177628,ENSG00000143630,ENSG00000198929,ENSG00000117152,ENSG00000143153,ENSG00000198216…
GO:BP	regulation of neurotransmitter secretion	GO:0046928	6.63416e-19	18.1782	92	5127	71	18123	ENSG00000107404,ENSG00000117016,ENSG00000132718,ENSG00000138078,ENSG00000115839,ENSG00000127838,ENSG00000114646,ENSG00000082701,ENSG00000145087,ENSG00000169760,ENSG00000168993,ENSG00000145335,ENSG00000081189,ENSG00000175471,ENSG00000070808,ENSG00000145920,ENSG00000047579,ENSG00000079841,ENSG00000135312,ENSG00000118432,ENSG00000164506,ENSG00000185345,ENSG00000164742,ENSG00000106089,ENSG00000158528…
GO:BP	regulation of neuron projection development	GO:0010975	9.68479e-19	18.0139	455	5127	225	18123	ENSG00000107404,ENSG00000198793,ENSG00000162490,ENSG00000133216,ENSG00000004487,ENSG00000162374,ENSG00000157193,ENSG00000173406,ENSG00000172260,ENSG00000117598,ENSG00000162631,ENSG00000181754,ENSG00000134259,ENSG00000143434,ENSG00000160716,ENSG00000196189,ENSG00000143320,ENSG00000198400,ENSG00000197959,ENSG00000143322,ENSG00000116741,ENSG00000118200,ENSG00000076356,ENSG00000116141,ENSG00000119283…
GO:BP	learning or memory	GO:0007611	2.97891e-18	17.5259	256	5127	145	18123	ENSG00000067606,ENSG00000198793,ENSG00000133216,ENSG00000204060,ENSG00000162374,ENSG00000177606,ENSG00000181656,ENSG00000134259,ENSG00000160716,ENSG00000132718,ENSG00000198400,ENSG00000159388,ENSG00000082482,ENSG00000179915,ENSG00000136531,ENSG00000118260,ENSG00000157103,ENSG00000187094,ENSG00000144746,ENSG00000160145,ENSG00000196549,ENSG00000197386,ENSG00000157404,ENSG00000145632,ENSG00000113161…
GO:BP	regulation of ion transport	GO:0043269	3.30469e-18	17.4809	728	5127	324	18123	ENSG00000078369,ENSG00000069424,ENSG00000158286,ENSG00000198793,ENSG00000175206,ENSG00000162494,ENSG00000186510,ENSG00000133216,ENSG00000090020,ENSG00000116329,ENSG00000159023,ENSG00000121905,ENSG00000117013,ENSG00000187048,ENSG00000169213,ENSG00000181754,ENSG00000116396,ENSG00000177301,ENSG00000177272,ENSG00000171385,ENSG00000134207,ENSG00000163399,ENSG00000174827,ENSG00000159164,ENSG00000160716…
GO:BP	regulation of transmembrane transport	GO:0034762	7.56013e-18	17.1215	620	5127	284	18123	ENSG00000078369,ENSG00000069424,ENSG00000158286,ENSG00000198793,ENSG00000175206,ENSG00000162494,ENSG00000186510,ENSG00000133216,ENSG00000090020,ENSG00000121905,ENSG00000117013,ENSG00000181754,ENSG00000116396,ENSG00000177301,ENSG00000177272,ENSG00000171385,ENSG00000143079,ENSG00000174827,ENSG00000143450,ENSG00000143630,ENSG00000162728,ENSG00000143318,ENSG00000198929,ENSG00000117152,ENSG00000143184…
GO:BP	regulation of neurotransmitter transport	GO:0051588	4.97712e-17	16.303	106	5127	76	18123	ENSG00000107404,ENSG00000117016,ENSG00000169213,ENSG00000132718,ENSG00000138078,ENSG00000115839,ENSG00000127838,ENSG00000132326,ENSG00000114646,ENSG00000082701,ENSG00000145087,ENSG00000169760,ENSG00000168993,ENSG00000145335,ENSG00000081189,ENSG00000175471,ENSG00000070808,ENSG00000184845,ENSG00000145920,ENSG00000047579,ENSG00000079841,ENSG00000135312,ENSG00000118432,ENSG00000164506,ENSG00000185345…
GO:BP	cell morphogenesis involved in differentiation	GO:0000904	7.30382e-17	16.1365	754	5127	329	18123	ENSG00000107404,ENSG00000162490,ENSG00000076864,ENSG00000070886,ENSG00000133216,ENSG00000117632,ENSG00000198492,ENSG00000183317,ENSG00000117400,ENSG00000162374,ENSG00000157193,ENSG00000173406,ENSG00000162614,ENSG00000117600,ENSG00000162631,ENSG00000143126,ENSG00000181754,ENSG00000134259,ENSG00000143434,ENSG00000160716,ENSG00000143590,ENSG00000196189,ENSG00000143320,ENSG00000198400,ENSG00000085552…
GO:BP	signal release	GO:0023061	1.04885e-16	15.9793	490	5127	233	18123	ENSG00000107404,ENSG00000175206,ENSG00000162545,ENSG00000117016,ENSG00000177301,ENSG00000134207,ENSG00000159164,ENSG00000160714,ENSG00000160716,ENSG00000132718,ENSG00000143195,ENSG00000198216,ENSG00000143858,ENSG00000117139,ENSG00000170498,ENSG00000143740,ENSG00000176887,ENSG00000163032,ENSG00000170745,ENSG00000119782,ENSG00000115138,ENSG00000115155,ENSG00000138078,ENSG00000171132,ENSG00000179915…
GO:BP	cognition	GO:0050890	2.20243e-16	15.6571	297	5127	158	18123	ENSG00000067606,ENSG00000198793,ENSG00000133216,ENSG00000204060,ENSG00000162374,ENSG00000177606,ENSG00000181656,ENSG00000134259,ENSG00000160716,ENSG00000132718,ENSG00000198400,ENSG00000159388,ENSG00000082482,ENSG00000179915,ENSG00000136531,ENSG00000163328,ENSG00000118260,ENSG00000157103,ENSG00000187094,ENSG00000144746,ENSG00000160145,ENSG00000196549,ENSG00000197386,ENSG00000152969,ENSG00000157404…
GO:BP	regulation of cellular component organization	GO:0051128	3.47014e-16	15.4597	2439	5127	880	18123	ENSG00000188976,ENSG00000107404,ENSG00000067606,ENSG00000157933,ENSG00000131697,ENSG00000171603,ENSG00000198793,ENSG00000171819,ENSG00000162490,ENSG00000177000,ENSG00000175206,ENSG00000120937,ENSG00000116786,ENSG00000132881,ENSG00000159363,ENSG00000090432,ENSG00000076864,ENSG00000162552,ENSG00000133216,ENSG00000004487,ENSG00000117632,ENSG00000175793,ENSG00000090020,ENSG00000181773,ENSG00000130766…
GO:BP	cell morphogenesis	GO:0000902	7.56535e-16	15.1212	1045	5127	426	18123	ENSG00000107404,ENSG00000067606,ENSG00000162490,ENSG00000158747,ENSG00000090432,ENSG00000076864,ENSG00000070886,ENSG00000133216,ENSG00000117632,ENSG00000198492,ENSG00000159023,ENSG00000146463,ENSG00000183317,ENSG00000131236,ENSG00000117400,ENSG00000162374,ENSG00000157193,ENSG00000173406,ENSG00000162614,ENSG00000117600,ENSG00000162631,ENSG00000143126,ENSG00000181754,ENSG00000143093,ENSG00000134259…
GO:BP	regulation of cation transmembrane transport	GO:1904062	1.08499e-15	14.9646	396	5127	195	18123	ENSG00000078369,ENSG00000069424,ENSG00000158286,ENSG00000175206,ENSG00000162494,ENSG00000133216,ENSG00000090020,ENSG00000121905,ENSG00000181754,ENSG00000174827,ENSG00000162728,ENSG00000143318,ENSG00000198929,ENSG00000117152,ENSG00000143184,ENSG00000143153,ENSG00000116741,ENSG00000058668,ENSG00000143786,ENSG00000143801,ENSG00000143761,ENSG00000077522,ENSG00000198626,ENSG00000119782,ENSG00000013016…
GO:BP	cell junction organization	GO:0034330	1.72387e-15	14.7635	727	5127	315	18123	ENSG00000107404,ENSG00000131697,ENSG00000171603,ENSG00000162552,ENSG00000133216,ENSG00000090020,ENSG00000116544,ENSG00000157193,ENSG00000132849,ENSG00000117114,ENSG00000162631,ENSG00000181754,ENSG00000160716,ENSG00000196189,ENSG00000198400,ENSG00000162706,ENSG00000085552,ENSG00000198929,ENSG00000197959,ENSG00000058085,ENSG00000143847,ENSG00000196878,ENSG00000143761,ENSG00000077522,ENSG00000119185…
GO:BP	regulation of synapse structure or activity	GO:0050803	1.78878e-15	14.7474	223	5127	126	18123	ENSG00000171603,ENSG00000133216,ENSG00000157193,ENSG00000117114,ENSG00000181754,ENSG00000160716,ENSG00000196189,ENSG00000198400,ENSG00000085552,ENSG00000197959,ENSG00000179915,ENSG00000204843,ENSG00000066032,ENSG00000162951,ENSG00000170396,ENSG00000138443,ENSG00000116106,ENSG00000066248,ENSG00000130294,ENSG00000175928,ENSG00000156959,ENSG00000164076,ENSG00000185008,ENSG00000160145,ENSG00000154928…
GO:BP	axon development	GO:0061564	2.05291e-15	14.6876	524	5127	242	18123	ENSG00000107404,ENSG00000162490,ENSG00000076864,ENSG00000070886,ENSG00000133216,ENSG00000117632,ENSG00000183317,ENSG00000173406,ENSG00000162614,ENSG00000117600,ENSG00000162631,ENSG00000181754,ENSG00000134198,ENSG00000134259,ENSG00000143434,ENSG00000160716,ENSG00000143590,ENSG00000196189,ENSG00000143320,ENSG00000198400,ENSG00000085552,ENSG00000058085,ENSG00000118200,ENSG00000076356,ENSG00000143494…
GO:BP	regulation of synapse organization	GO:0050807	2.93348e-15	14.5326	212	5127	121	18123	ENSG00000171603,ENSG00000133216,ENSG00000157193,ENSG00000117114,ENSG00000181754,ENSG00000160716,ENSG00000196189,ENSG00000198400,ENSG00000085552,ENSG00000197959,ENSG00000179915,ENSG00000204843,ENSG00000066032,ENSG00000162951,ENSG00000170396,ENSG00000138443,ENSG00000116106,ENSG00000066248,ENSG00000130294,ENSG00000175928,ENSG00000156959,ENSG00000164076,ENSG00000185008,ENSG00000160145,ENSG00000154928…
GO:BP	axonogenesis	GO:0007409	2.95977e-15	14.5287	479	5127	225	18123	ENSG00000107404,ENSG00000162490,ENSG00000076864,ENSG00000070886,ENSG00000133216,ENSG00000117632,ENSG00000183317,ENSG00000173406,ENSG00000162614,ENSG00000117600,ENSG00000162631,ENSG00000181754,ENSG00000134259,ENSG00000143434,ENSG00000160716,ENSG00000143590,ENSG00000196189,ENSG00000143320,ENSG00000198400,ENSG00000085552,ENSG00000058085,ENSG00000076356,ENSG00000157851,ENSG00000021574,ENSG00000179915…
GO:BP	regulation of plasma membrane bounded cell projection organization	GO:0120035	3.26567e-15	14.486	642	5127	284	18123	ENSG00000107404,ENSG00000198793,ENSG00000162490,ENSG00000076864,ENSG00000133216,ENSG00000004487,ENSG00000174574,ENSG00000162374,ENSG00000157193,ENSG00000173406,ENSG00000172260,ENSG00000122417,ENSG00000137942,ENSG00000117598,ENSG00000162631,ENSG00000181754,ENSG00000134259,ENSG00000171943,ENSG00000143434,ENSG00000160716,ENSG00000196189,ENSG00000143320,ENSG00000198400,ENSG00000197959,ENSG00000143322…
GO:BP	regulation of postsynaptic membrane potential	GO:0060078	7.08256e-15	14.1498	142	5127	90	18123	ENSG00000107404,ENSG00000187730,ENSG00000067606,ENSG00000163873,ENSG00000160716,ENSG00000117152,ENSG00000179915,ENSG00000115839,ENSG00000082701,ENSG00000169760,ENSG00000109158,ENSG00000145335,ENSG00000152208,ENSG00000138814,ENSG00000109738,ENSG00000145451,ENSG00000186479,ENSG00000081189,ENSG00000155511,ENSG00000145864,ENSG00000145863,ENSG00000022355,ENSG00000113327,ENSG00000204681,ENSG00000112759…
GO:BP	cation transmembrane transport	GO:0098655	8.12844e-15	14.09	936	5127	385	18123	ENSG00000078369,ENSG00000069424,ENSG00000158286,ENSG00000175206,ENSG00000162494,ENSG00000159363,ENSG00000133216,ENSG00000090020,ENSG00000121905,ENSG00000117013,ENSG00000181754,ENSG00000197106,ENSG00000116396,ENSG00000177301,ENSG00000177272,ENSG00000171385,ENSG00000163399,ENSG00000174827,ENSG00000143630,ENSG00000162728,ENSG00000143318,ENSG00000198929,ENSG00000117152,ENSG00000143184,ENSG00000143153…
GO:BP	synapse assembly	GO:0007416	8.68258e-15	14.0614	181	5127	107	18123	ENSG00000107404,ENSG00000171603,ENSG00000133216,ENSG00000117114,ENSG00000181754,ENSG00000160716,ENSG00000196189,ENSG00000198400,ENSG00000197959,ENSG00000179915,ENSG00000075340,ENSG00000162951,ENSG00000178568,ENSG00000124006,ENSG00000187957,ENSG00000175928,ENSG00000156959,ENSG00000164061,ENSG00000185008,ENSG00000172020,ENSG00000154928,ENSG00000158258,ENSG00000121871,ENSG00000169760,ENSG00000182580…
GO:BP	protein localization	GO:0008104	1.4741e-14	13.8315	2670	5127	943	18123	ENSG00000107404,ENSG00000067606,ENSG00000131697,ENSG00000069424,ENSG00000116237,ENSG00000188807,ENSG00000171603,ENSG00000142655,ENSG00000116786,ENSG00000132881,ENSG00000159363,ENSG00000158747,ENSG00000162545,ENSG00000117245,ENSG00000133216,ENSG00000004487,ENSG00000204160,ENSG00000175793,ENSG00000130766,ENSG00000159023,ENSG00000060656,ENSG00000025800,ENSG00000121905,ENSG00000116954,ENSG00000178028…
GO:BP	cell development	GO:0048468	1.57093e-14	13.8038	2122	5127	771	18123	ENSG00000107404,ENSG00000067606,ENSG00000157933,ENSG00000197921,ENSG00000131697,ENSG00000116254,ENSG00000198793,ENSG00000162490,ENSG00000175206,ENSG00000158747,ENSG00000090432,ENSG00000076864,ENSG00000162552,ENSG00000070886,ENSG00000133216,ENSG00000004487,ENSG00000182749,ENSG00000117632,ENSG00000175793,ENSG00000198492,ENSG00000020129,ENSG00000183317,ENSG00000185668,ENSG00000204060,ENSG00000117400…
GO:BP	regulation of cell projection organization	GO:0031344	1.83471e-14	13.7364	660	5127	288	18123	ENSG00000107404,ENSG00000198793,ENSG00000162490,ENSG00000076864,ENSG00000133216,ENSG00000004487,ENSG00000174574,ENSG00000162374,ENSG00000157193,ENSG00000173406,ENSG00000172260,ENSG00000122417,ENSG00000137942,ENSG00000117598,ENSG00000162631,ENSG00000181754,ENSG00000134259,ENSG00000171943,ENSG00000143434,ENSG00000160716,ENSG00000196189,ENSG00000143320,ENSG00000198400,ENSG00000197959,ENSG00000143322…
GO:BP	dendrite morphogenesis	GO:0048813	3.68556e-14	13.4335	149	5127	92	18123	ENSG00000107404,ENSG00000133216,ENSG00000162374,ENSG00000157193,ENSG00000143126,ENSG00000160716,ENSG00000197959,ENSG00000066032,ENSG00000138443,ENSG00000118263,ENSG00000078018,ENSG00000124006,ENSG00000116106,ENSG00000066248,ENSG00000130294,ENSG00000182606,ENSG00000008324,ENSG00000082701,ENSG00000160145,ENSG00000154928,ENSG00000174953,ENSG00000169760,ENSG00000182580,ENSG00000198836,ENSG00000138814…
GO:BP	cellular localization	GO:0051641	6.16121e-14	13.2103	3519	5127	1200	18123	ENSG00000107404,ENSG00000067606,ENSG00000131697,ENSG00000069424,ENSG00000158286,ENSG00000116237,ENSG00000188807,ENSG00000171603,ENSG00000142655,ENSG00000198793,ENSG00000175206,ENSG00000116786,ENSG00000132881,ENSG00000159363,ENSG00000162545,ENSG00000090432,ENSG00000117245,ENSG00000133216,ENSG00000004487,ENSG00000179163,ENSG00000204160,ENSG00000175793,ENSG00000130766,ENSG00000159023,ENSG00000060656…
GO:BP	positive regulation of synaptic transmission	GO:0050806	9.05365e-14	13.0432	155	5127	94	18123	ENSG00000067606,ENSG00000171603,ENSG00000133216,ENSG00000117016,ENSG00000198400,ENSG00000170498,ENSG00000143740,ENSG00000171132,ENSG00000179915,ENSG00000115839,ENSG00000118260,ENSG00000116106,ENSG00000082701,ENSG00000158258,ENSG00000196549,ENSG00000169760,ENSG00000168824,ENSG00000145335,ENSG00000145632,ENSG00000146006,ENSG00000120727,ENSG00000184845,ENSG00000169220,ENSG00000047579,ENSG00000079689…
GO:BP	regulation of neurotransmitter receptor activity	GO:0099601	1.00537e-13	12.9977	80	5127	59	18123	ENSG00000133216,ENSG00000116544,ENSG00000143786,ENSG00000077522,ENSG00000179915,ENSG00000169760,ENSG00000109819,ENSG00000120251,ENSG00000145708,ENSG00000152413,ENSG00000081189,ENSG00000070808,ENSG00000155511,ENSG00000204314,ENSG00000058404,ENSG00000106236,ENSG00000189056,ENSG00000198010,ENSG00000277586,ENSG00000120899,ENSG00000198576,ENSG00000167653,ENSG00000180155,ENSG00000196730,ENSG00000176884…
GO:BP	cellular component organization or biogenesis	GO:0071840	1.3403e-13	12.8728	6880	5127	2192	18123	ENSG00000188976,ENSG00000107404,ENSG00000067606,ENSG00000157933,ENSG00000197921,ENSG00000169598,ENSG00000131697,ENSG00000116254,ENSG00000187017,ENSG00000162408,ENSG00000116273,ENSG00000007923,ENSG00000188807,ENSG00000171603,ENSG00000175279,ENSG00000241563,ENSG00000142655,ENSG00000198793,ENSG00000171819,ENSG00000162490,ENSG00000177000,ENSG00000011021,ENSG00000175206,ENSG00000120937,ENSG00000116731…
142185	ENSG00000160256	ENSG00000197381	ENSG00000142156	ENSG00000160282	ENSG00000160284	ENSG00000160299	ENSG00000215193	ENSG00000183785	ENSG00000070371	ENSG00000215012	ENSG00000099889	ENSG00000183597	ENSG00000040608	ENSG00000099910	ENSG00000241973	ENSG00000099940	ENSG00000185651	ENSG00000100030	ENSG00000100034	ENSG00000186716	ENSG00000099991	ENSG00000128271	ENSG00000100024	ENSG00000100099	ENSG00000180957	ENSG00000100219	ENSG00000183762	ENSG00000100285	ENSG00000186575	ENSG00000185133	ENSG00000185721	ENSG00000184708	ENSG00000241878	ENSG00000128245	ENSG00000100320	ENSG00000166862	ENSG00000100379	ENSG00000187045	ENSG00000278195	ENSG00000241360	ENSG00000100129	ENSG00000128298	ENSG00000183741	ENSG00000100307	ENSG00000100321	ENSG00000100335	ENSG00000196588	ENSG00000100372	ENSG00000100380
GO:BP	learning	GO:0007612	1.79459e-13	12.746	147	5127	90	18123	ENSG00000198793,ENSG00000133216,ENSG00000162374,ENSG00000177606,ENSG00000181656,ENSG00000160716,ENSG00000132718,ENSG00000159388,ENSG00000179915,ENSG00000118260,ENSG00000157103,ENSG00000187094,ENSG00000160145,ENSG00000197386,ENSG00000157404,ENSG00000113161,ENSG00000213585,ENSG00000184845,ENSG00000169220,ENSG00000124788,ENSG00000197283,ENSG00000135298,ENSG00000146242,ENSG00000185345,ENSG00000006128…
GO:BP	regulation of ion transmembrane transporter activity	GO:0032412	2.91872e-13	12.5348	284	5127	146	18123	ENSG00000158286,ENSG00000175206,ENSG00000162494,ENSG00000133216,ENSG00000090020,ENSG00000121905,ENSG00000181754,ENSG00000174827,ENSG00000143318,ENSG00000198929,ENSG00000143153,ENSG00000143786,ENSG00000077522,ENSG00000198626,ENSG00000119782,ENSG00000013016,ENSG00000171132,ENSG00000179915,ENSG00000182389,ENSG00000198648,ENSG00000135932,ENSG00000113851,ENSG00000152642,ENSG00000144681,ENSG00000172939…
GO:BP	cation transport	GO:0006812	3.90002e-13	12.4089	1210	5127	470	18123	ENSG00000078369,ENSG00000069424,ENSG00000158286,ENSG00000175206,ENSG00000162494,ENSG00000159363,ENSG00000133216,ENSG00000090020,ENSG00000116329,ENSG00000159023,ENSG00000121905,ENSG00000117013,ENSG00000117834,ENSG00000169213,ENSG00000181754,ENSG00000197106,ENSG00000116396,ENSG00000177301,ENSG00000177272,ENSG00000171385,ENSG00000134207,ENSG00000163399,ENSG00000174827,ENSG00000160716,ENSG00000143630…
GO:BP	cellular component organization	GO:0016043	6.45543e-13	12.1901	6661	5127	2123	18123	ENSG00000188976,ENSG00000107404,ENSG00000067606,ENSG00000157933,ENSG00000197921,ENSG00000169598,ENSG00000131697,ENSG00000116254,ENSG00000187017,ENSG00000116273,ENSG00000007923,ENSG00000188807,ENSG00000171603,ENSG00000175279,ENSG00000241563,ENSG00000142655,ENSG00000198793,ENSG00000171819,ENSG00000162490,ENSG00000177000,ENSG00000011021,ENSG00000175206,ENSG00000120937,ENSG00000116731,ENSG00000116786…
169933	ENSG00000196459	ENSG00000147003	ENSG00000102054	ENSG00000169891	ENSG00000008086	ENSG00000102104	ENSG00000147010	ENSG00000184368	ENSG00000177189	ENSG00000149970	ENSG00000130741	ENSG00000182220	ENSG00000102225	ENSG00000008056	ENSG00000068354	ENSG00000102057	ENSG00000068400	ENSG00000147144	ENSG00000196998	ENSG00000102003	ENSG00000189369	ENSG00000184205	ENSG00000124313	ENSG00000196632	ENSG00000102302	ENSG00000247746	ENSG00000188021	ENSG00000184675	ENSG00000126970	ENSG00000169083	ENSG00000082458	ENSG00000147130	ENSG00000186462	ENSG00000102383	ENSG00000085224	ENSG00000155008	ENSG00000186310	ENSG00000147202	ENSG00000126950	ENSG00000102385	ENSG00000126953	ENSG00000102401	ENSG00000158164	ENSG00000198908	ENSG00000068366	ENSG00000077264	ENSG00000077279	ENSG00000072315	ENSG00000018610
GO:BP	regulation of synaptic vesicle exocytosis	GO:2000300	1.02018e-12	11.9913	61	5127	48	18123	ENSG00000107404,ENSG00000117016,ENSG00000138078,ENSG00000115839,ENSG00000114646,ENSG00000082701,ENSG00000145087,ENSG00000169760,ENSG00000047579,ENSG00000079841,ENSG00000135312,ENSG00000118432,ENSG00000164506,ENSG00000164742,ENSG00000181072,ENSG00000157680,ENSG00000157764,ENSG00000164885,ENSG00000176406,ENSG00000107282,ENSG00000198785,ENSG00000107130,ENSG00000165995,ENSG00000150594,ENSG00000149295…
GO:BP	inorganic ion transmembrane transport	GO:0098660	1.40972e-12	11.8509	876	5127	356	18123	ENSG00000078369,ENSG00000187730,ENSG00000069424,ENSG00000158286,ENSG00000198793,ENSG00000011021,ENSG00000175206,ENSG00000162494,ENSG00000090020,ENSG00000121905,ENSG00000117013,ENSG00000181754,ENSG00000197106,ENSG00000116396,ENSG00000177301,ENSG00000177272,ENSG00000171385,ENSG00000163399,ENSG00000143630,ENSG00000162728,ENSG00000143318,ENSG00000198929,ENSG00000117152,ENSG00000143184,ENSG00000143153…
GO:BP	regulation of transmembrane transporter activity	GO:0022898	2.76142e-12	11.5589	295	5127	148	18123	ENSG00000158286,ENSG00000175206,ENSG00000162494,ENSG00000133216,ENSG00000090020,ENSG00000121905,ENSG00000181754,ENSG00000174827,ENSG00000143318,ENSG00000198929,ENSG00000143153,ENSG00000143786,ENSG00000077522,ENSG00000198626,ENSG00000119782,ENSG00000013016,ENSG00000171132,ENSG00000179915,ENSG00000182389,ENSG00000198648,ENSG00000135932,ENSG00000113851,ENSG00000152642,ENSG00000144681,ENSG00000172939…
GO:BP	regulation of exocytosis	GO:0017157	5.35228e-12	11.2715	208	5127	113	18123	ENSG00000107404,ENSG00000175206,ENSG00000132881,ENSG00000159363,ENSG00000117016,ENSG00000169213,ENSG00000134207,ENSG00000132718,ENSG00000143858,ENSG00000143761,ENSG00000163032,ENSG00000115884,ENSG00000138078,ENSG00000074054,ENSG00000115839,ENSG00000091428,ENSG00000171450,ENSG00000163539,ENSG00000114646,ENSG00000186792,ENSG00000163618,ENSG00000082701,ENSG00000145087,ENSG00000169760,ENSG00000168993…
GO:BP	regulation of cation channel activity	GO:2001257	6.3557e-12	11.1968	201	5127	110	18123	ENSG00000158286,ENSG00000175206,ENSG00000162494,ENSG00000133216,ENSG00000121905,ENSG00000181754,ENSG00000143318,ENSG00000198929,ENSG00000143786,ENSG00000077522,ENSG00000119782,ENSG00000013016,ENSG00000179915,ENSG00000182389,ENSG00000113851,ENSG00000144681,ENSG00000213533,ENSG00000163681,ENSG00000169282,ENSG00000169760,ENSG00000114279,ENSG00000197386,ENSG00000109819,ENSG00000109689,ENSG00000145362…
GO:BP	cellular protein localization	GO:0034613	6.52151e-12	11.1857	1842	5127	668	18123	ENSG00000107404,ENSG00000067606,ENSG00000131697,ENSG00000069424,ENSG00000116237,ENSG00000188807,ENSG00000171603,ENSG00000142655,ENSG00000132881,ENSG00000159363,ENSG00000133216,ENSG00000004487,ENSG00000204160,ENSG00000175793,ENSG00000130766,ENSG00000159023,ENSG00000060656,ENSG00000025800,ENSG00000121905,ENSG00000116954,ENSG00000178028,ENSG00000123473,ENSG00000169213,ENSG00000058804,ENSG00000116209…
GO:BP	establishment of protein localization	GO:0045184	8.37686e-12	11.0769	1866	5127	675	18123	ENSG00000067606,ENSG00000116237,ENSG00000171603,ENSG00000142655,ENSG00000132881,ENSG00000159363,ENSG00000162545,ENSG00000117245,ENSG00000204160,ENSG00000175793,ENSG00000025800,ENSG00000121905,ENSG00000178028,ENSG00000085832,ENSG00000169213,ENSG00000058804,ENSG00000134709,ENSG00000203965,ENSG00000134262,ENSG00000265808,ENSG00000174827,ENSG00000131779,ENSG00000136631,ENSG00000143457,ENSG00000143376…
GO:BP	dendritic spine development	GO:0060996	1.05035e-11	10.9787	102	5127	67	18123	ENSG00000107404,ENSG00000198793,ENSG00000133216,ENSG00000204060,ENSG00000157193,ENSG00000171943,ENSG00000197959,ENSG00000143761,ENSG00000071051,ENSG00000138443,ENSG00000116106,ENSG00000066248,ENSG00000130294,ENSG00000144711,ENSG00000160145,ENSG00000154928,ENSG00000174953,ENSG00000169760,ENSG00000182580,ENSG00000198836,ENSG00000145632,ENSG00000081189,ENSG00000053108,ENSG00000070808,ENSG00000113758…
GO:BP	regulation of biological quality	GO:0065008	1.12426e-11	10.9491	4116	5127	1364	18123	ENSG00000107404,ENSG00000078369,ENSG00000187730,ENSG00000067606,ENSG00000131697,ENSG00000069424,ENSG00000158286,ENSG00000171603,ENSG00000198793,ENSG00000204624,ENSG00000162490,ENSG00000011021,ENSG00000175206,ENSG00000120937,ENSG00000197312,ENSG00000159363,ENSG00000169914,ENSG00000162545,ENSG00000090432,ENSG00000162552,ENSG00000133216,ENSG00000004487,ENSG00000179546,ENSG00000125944,ENSG00000001460…
GO:BP	potassium ion transport	GO:0006813	1.15995e-11	10.9356	255	5127	131	18123	ENSG00000078369,ENSG00000069424,ENSG00000158286,ENSG00000175206,ENSG00000162494,ENSG00000090020,ENSG00000117013,ENSG00000181754,ENSG00000116396,ENSG00000177301,ENSG00000177272,ENSG00000171385,ENSG00000163399,ENSG00000143630,ENSG00000162728,ENSG00000198929,ENSG00000117152,ENSG00000143153,ENSG00000143473,ENSG00000082482,ENSG00000135750,ENSG00000077522,ENSG00000162975,ENSG00000170745,ENSG00000171303…
GO:BP	cellular macromolecule localization	GO:0070727	1.18127e-11	10.9276	1856	5127	671	18123	ENSG00000107404,ENSG00000067606,ENSG00000131697,ENSG00000069424,ENSG00000116237,ENSG00000188807,ENSG00000171603,ENSG00000142655,ENSG00000132881,ENSG00000159363,ENSG00000133216,ENSG00000004487,ENSG00000204160,ENSG00000175793,ENSG00000130766,ENSG00000159023,ENSG00000060656,ENSG00000025800,ENSG00000121905,ENSG00000116954,ENSG00000178028,ENSG00000123473,ENSG00000169213,ENSG00000058804,ENSG00000116209…
GO:BP	regulation of localization	GO:0032879	1.44673e-11	10.8396	2906	5127	997	18123	ENSG00000186891,ENSG00000107404,ENSG00000078369,ENSG00000067606,ENSG00000069424,ENSG00000158286,ENSG00000198793,ENSG00000204624,ENSG00000175206,ENSG00000120937,ENSG00000162494,ENSG00000116786,ENSG00000186510,ENSG00000132881,ENSG00000159363,ENSG00000158747,ENSG00000162545,ENSG00000090432,ENSG00000162552,ENSG00000133216,ENSG00000004487,ENSG00000117632,ENSG00000175793,ENSG00000090020,ENSG00000130766…
GO:BP	synaptic transmission, glutamatergic	GO:0035249	1.6262e-11	10.7888	94	5127	63	18123	ENSG00000158109,ENSG00000163873,ENSG00000198400,ENSG00000143786,ENSG00000179915,ENSG00000115839,ENSG00000003393,ENSG00000196277,ENSG00000164082,ENSG00000169760,ENSG00000152208,ENSG00000120251,ENSG00000109572,ENSG00000152413,ENSG00000081189,ENSG00000184845,ENSG00000113262,ENSG00000124493,ENSG00000135312,ENSG00000118432,ENSG00000164418,ENSG00000152822,ENSG00000185345,ENSG00000189056,ENSG00000179603…
GO:BP	ion transmembrane transport	GO:0034220	2.92401e-11	10.534	1169	5127	448	18123	ENSG00000078369,ENSG00000187730,ENSG00000069424,ENSG00000158286,ENSG00000198793,ENSG00000011021,ENSG00000175206,ENSG00000162494,ENSG00000186510,ENSG00000159363,ENSG00000133216,ENSG00000090020,ENSG00000121905,ENSG00000163873,ENSG00000117013,ENSG00000197147,ENSG00000181754,ENSG00000197106,ENSG00000116396,ENSG00000177301,ENSG00000177272,ENSG00000171385,ENSG00000163399,ENSG00000174827,ENSG00000160716…
GO:BP	establishment of localization	GO:0051234	3.55923e-11	10.4486	5364	5127	1730	18123	ENSG00000107404,ENSG00000189339,ENSG00000078369,ENSG00000187730,ENSG00000067606,ENSG00000069424,ENSG00000158286,ENSG00000116237,ENSG00000162426,ENSG00000188807,ENSG00000171603,ENSG00000142655,ENSG00000198793,ENSG00000204624,ENSG00000011021,ENSG00000175206,ENSG00000120937,ENSG00000162494,ENSG00000186510,ENSG00000132881,ENSG00000159363,ENSG00000162545,ENSG00000090432,ENSG00000117245,ENSG00000133216…
GO:BP	inorganic cation transmembrane transport	GO:0098662	5.58389e-11	10.2531	812	5127	328	18123	ENSG00000078369,ENSG00000069424,ENSG00000158286,ENSG00000175206,ENSG00000162494,ENSG00000090020,ENSG00000121905,ENSG00000117013,ENSG00000181754,ENSG00000197106,ENSG00000116396,ENSG00000177301,ENSG00000177272,ENSG00000171385,ENSG00000163399,ENSG00000143630,ENSG00000162728,ENSG00000143318,ENSG00000198929,ENSG00000117152,ENSG00000143184,ENSG00000143153,ENSG00000198216,ENSG00000058668,ENSG00000143473…
GO:BP	nitrogen compound transport	GO:0071705	5.7374e-11	10.2413	2216	5127	780	18123	ENSG00000067606,ENSG00000116237,ENSG00000171603,ENSG00000142655,ENSG00000175206,ENSG00000132881,ENSG00000159363,ENSG00000162545,ENSG00000117245,ENSG00000204160,ENSG00000175793,ENSG00000025800,ENSG00000121905,ENSG00000178028,ENSG00000085832,ENSG00000169213,ENSG00000058804,ENSG00000134709,ENSG00000203965,ENSG00000085491,ENSG00000197106,ENSG00000177301,ENSG00000134262,ENSG00000134207,ENSG00000265808…
GO:BP	regulation of transporter activity	GO:0032409	6.3129e-11	10.1998	317	5127	153	18123	ENSG00000158286,ENSG00000175206,ENSG00000162494,ENSG00000133216,ENSG00000090020,ENSG00000121905,ENSG00000181754,ENSG00000143079,ENSG00000174827,ENSG00000143318,ENSG00000198929,ENSG00000143153,ENSG00000143786,ENSG00000077522,ENSG00000198626,ENSG00000119782,ENSG00000013016,ENSG00000171132,ENSG00000179915,ENSG00000182389,ENSG00000198648,ENSG00000135932,ENSG00000113851,ENSG00000152642,ENSG00000144681…
GO:BP	memory	GO:0007613	6.8545e-11	10.164	118	5127	73	18123	ENSG00000067606,ENSG00000198793,ENSG00000204060,ENSG00000134259,ENSG00000160716,ENSG00000132718,ENSG00000082482,ENSG00000136531,ENSG00000118260,ENSG00000157103,ENSG00000187094,ENSG00000160145,ENSG00000145632,ENSG00000198961,ENSG00000152495,ENSG00000120727,ENSG00000155511,ENSG00000169220,ENSG00000124588,ENSG00000124788,ENSG00000204371,ENSG00000183826,ENSG00000118432,ENSG00000164742,ENSG00000006128…
GO:BP	macromolecule localization	GO:0033036	7.33261e-11	10.1347	3148	5127	1066	18123	ENSG00000107404,ENSG00000067606,ENSG00000131697,ENSG00000069424,ENSG00000116237,ENSG00000188807,ENSG00000171603,ENSG00000142655,ENSG00000204624,ENSG00000116786,ENSG00000132881,ENSG00000159363,ENSG00000158747,ENSG00000162545,ENSG00000117245,ENSG00000133216,ENSG00000004487,ENSG00000204160,ENSG00000175793,ENSG00000130766,ENSG00000159023,ENSG00000060656,ENSG00000121769,ENSG00000025800,ENSG00000121905…
GO:BP	transport	GO:0006810	7.87994e-11	10.1035	5214	5127	1683	18123	ENSG00000107404,ENSG00000189339,ENSG00000078369,ENSG00000187730,ENSG00000067606,ENSG00000069424,ENSG00000158286,ENSG00000116237,ENSG00000162426,ENSG00000188807,ENSG00000171603,ENSG00000142655,ENSG00000198793,ENSG00000204624,ENSG00000011021,ENSG00000175206,ENSG00000120937,ENSG00000162494,ENSG00000186510,ENSG00000132881,ENSG00000159363,ENSG00000162545,ENSG00000090432,ENSG00000117245,ENSG00000133216…
GO:BP	positive regulation of nervous system development	GO:0051962	8.58385e-11	10.0663	281	5127	139	18123	ENSG00000171603,ENSG00000198793,ENSG00000133216,ENSG00000004487,ENSG00000157193,ENSG00000117114,ENSG00000181754,ENSG00000134259,ENSG00000196189,ENSG00000143320,ENSG00000198400,ENSG00000076356,ENSG00000176887,ENSG00000115738,ENSG00000179915,ENSG00000119866,ENSG00000079246,ENSG00000124006,ENSG00000116106,ENSG00000115694,ENSG00000175928,ENSG00000144674,ENSG00000168036,ENSG00000182606,ENSG00000008324…
GO:BP	potassium ion transmembrane transport	GO:0071805	1.59921e-10	9.79609	231	5127	119	18123	ENSG00000078369,ENSG00000069424,ENSG00000158286,ENSG00000175206,ENSG00000162494,ENSG00000090020,ENSG00000117013,ENSG00000181754,ENSG00000116396,ENSG00000177301,ENSG00000177272,ENSG00000171385,ENSG00000163399,ENSG00000143630,ENSG00000162728,ENSG00000198929,ENSG00000117152,ENSG00000143153,ENSG00000143473,ENSG00000082482,ENSG00000135750,ENSG00000077522,ENSG00000162975,ENSG00000170745,ENSG00000171303…
GO:BP	protein transport	GO:0015031	1.82652e-10	9.73838	1754	5127	632	18123	ENSG00000067606,ENSG00000116237,ENSG00000171603,ENSG00000142655,ENSG00000132881,ENSG00000159363,ENSG00000162545,ENSG00000117245,ENSG00000204160,ENSG00000175793,ENSG00000025800,ENSG00000121905,ENSG00000178028,ENSG00000085832,ENSG00000169213,ENSG00000058804,ENSG00000134709,ENSG00000203965,ENSG00000134262,ENSG00000265808,ENSG00000174827,ENSG00000131779,ENSG00000136631,ENSG00000143457,ENSG00000143376…
GO:BP	neuron projection organization	GO:0106027	1.95312e-10	9.70927	93	5127	61	18123	ENSG00000107404,ENSG00000133216,ENSG00000157193,ENSG00000197959,ENSG00000143761,ENSG00000204843,ENSG00000170396,ENSG00000138443,ENSG00000116106,ENSG00000066248,ENSG00000130294,ENSG00000082701,ENSG00000160145,ENSG00000154928,ENSG00000120756,ENSG00000174953,ENSG00000169760,ENSG00000182580,ENSG00000198836,ENSG00000152413,ENSG00000113758,ENSG00000136279,ENSG00000058404,ENSG00000158528,ENSG00000189056…
GO:BP	regulation of dendrite development	GO:0050773	2.02358e-10	9.69388	104	5127	66	18123	ENSG00000162374,ENSG00000157193,ENSG00000160716,ENSG00000118200,ENSG00000116141,ENSG00000171094,ENSG00000119866,ENSG00000124006,ENSG00000116106,ENSG00000008324,ENSG00000082701,ENSG00000160145,ENSG00000174953,ENSG00000058866,ENSG00000198836,ENSG00000138814,ENSG00000109756,ENSG00000113758,ENSG00000137261,ENSG00000124507,ENSG00000044090,ENSG00000135298,ENSG00000130347,ENSG00000002746,ENSG00000136279…
GO:BP	regulation of nervous system development	GO:0051960	2.77579e-10	9.55661	453	5127	201	18123	ENSG00000157933,ENSG00000197921,ENSG00000171603,ENSG00000198793,ENSG00000162490,ENSG00000133216,ENSG00000004487,ENSG00000198492,ENSG00000157193,ENSG00000173406,ENSG00000117114,ENSG00000181754,ENSG00000134259,ENSG00000143363,ENSG00000143434,ENSG00000196189,ENSG00000143320,ENSG00000198400,ENSG00000076356,ENSG00000143507,ENSG00000176887,ENSG00000115738,ENSG00000179915,ENSG00000115310,ENSG00000119866…
GO:BP	regulation of regulated secretory pathway	GO:1903305	6.08641e-10	9.21564	145	5127	83	18123	ENSG00000107404,ENSG00000175206,ENSG00000117016,ENSG00000134207,ENSG00000132718,ENSG00000143858,ENSG00000143761,ENSG00000138078,ENSG00000115839,ENSG00000171450,ENSG00000114646,ENSG00000186792,ENSG00000082701,ENSG00000145087,ENSG00000169760,ENSG00000169194,ENSG00000047579,ENSG00000079841,ENSG00000135312,ENSG00000118432,ENSG00000164506,ENSG00000164742,ENSG00000106089,ENSG00000188372,ENSG00000181072…
GO:BP	calcium-ion regulated exocytosis	GO:0017156	1.3958e-09	8.85518	66	5127	47	18123	ENSG00000117016,ENSG00000134207,ENSG00000132718,ENSG00000143858,ENSG00000143761,ENSG00000115839,ENSG00000091428,ENSG00000171450,ENSG00000157152,ENSG00000186792,ENSG00000163618,ENSG00000079841,ENSG00000106089,ENSG00000188372,ENSG00000081803,ENSG00000165125,ENSG00000164885,ENSG00000176406,ENSG00000198722,ENSG00000136854,ENSG00000204176,ENSG00000107758,ENSG00000150594,ENSG00000019505,ENSG00000011347…
GO:BP	dendritic spine morphogenesis	GO:0060997	1.44196e-09	8.84105	62	5127	45	18123	ENSG00000107404,ENSG00000133216,ENSG00000157193,ENSG00000197959,ENSG00000138443,ENSG00000116106,ENSG00000066248,ENSG00000130294,ENSG00000160145,ENSG00000154928,ENSG00000174953,ENSG00000169760,ENSG00000182580,ENSG00000198836,ENSG00000113758,ENSG00000136279,ENSG00000058404,ENSG00000158528,ENSG00000189056,ENSG00000164885,ENSG00000198576,ENSG00000138311,ENSG00000135387,ENSG00000162105,ENSG00000110888…
GO:BP	transmembrane transport	GO:0055085	2.42926e-09	8.61453	1648	5127	592	18123	ENSG00000189339,ENSG00000078369,ENSG00000187730,ENSG00000069424,ENSG00000158286,ENSG00000162426,ENSG00000142655,ENSG00000198793,ENSG00000011021,ENSG00000175206,ENSG00000162494,ENSG00000186510,ENSG00000159363,ENSG00000133216,ENSG00000090020,ENSG00000130766,ENSG00000121905,ENSG00000189280,ENSG00000188910,ENSG00000126067,ENSG00000116885,ENSG00000163873,ENSG00000117013,ENSG00000117834,ENSG00000162409…
GO:BP	regulation of dendritic spine morphogenesis	GO:0061001	2.47058e-09	8.6072	47	5127	37	18123	ENSG00000157193,ENSG00000197959,ENSG00000138443,ENSG00000116106,ENSG00000066248,ENSG00000130294,ENSG00000160145,ENSG00000174953,ENSG00000169760,ENSG00000198836,ENSG00000113758,ENSG00000136279,ENSG00000058404,ENSG00000158528,ENSG00000189056,ENSG00000164885,ENSG00000198576,ENSG00000135387,ENSG00000110888,ENSG00000087470,ENSG00000188906,ENSG00000139220,ENSG00000111249,ENSG00000197555,ENSG00000137825…
GO:BP	regulation of secretion by cell	GO:1903530	2.80809e-09	8.55159	591	5127	246	18123	ENSG00000107404,ENSG00000175206,ENSG00000132881,ENSG00000159363,ENSG00000162545,ENSG00000117016,ENSG00000169213,ENSG00000177301,ENSG00000134207,ENSG00000143457,ENSG00000160716,ENSG00000132718,ENSG00000198216,ENSG00000143858,ENSG00000117139,ENSG00000170498,ENSG00000143761,ENSG00000176887,ENSG00000163032,ENSG00000170745,ENSG00000115884,ENSG00000119782,ENSG00000115138,ENSG00000138078,ENSG00000171132…
GO:BP	regulation of dendritic spine development	GO:0060998	3.6625e-09	8.43622	63	5127	45	18123	ENSG00000198793,ENSG00000204060,ENSG00000157193,ENSG00000171943,ENSG00000197959,ENSG00000143761,ENSG00000066248,ENSG00000130294,ENSG00000160145,ENSG00000174953,ENSG00000169760,ENSG00000198836,ENSG00000145632,ENSG00000081189,ENSG00000053108,ENSG00000113758,ENSG00000196591,ENSG00000136279,ENSG00000058404,ENSG00000158528,ENSG00000189056,ENSG00000153317,ENSG00000198785,ENSG00000107864,ENSG00000107954…
GO:BP	localization	GO:0051179	4.35882e-09	8.36063	6938	5127	2169	18123	ENSG00000186891,ENSG00000107404,ENSG00000189339,ENSG00000078369,ENSG00000187730,ENSG00000067606,ENSG00000157933,ENSG00000131697,ENSG00000069424,ENSG00000158286,ENSG00000116237,ENSG00000171680,ENSG00000162426,ENSG00000188807,ENSG00000171603,ENSG00000142655,ENSG00000198793,ENSG00000204624,ENSG00000011021,ENSG00000175206,ENSG00000120937,ENSG00000162494,ENSG00000116786,ENSG00000186510,ENSG00000132881…
100036	ENSG00000184792	ENSG00000184708	ENSG00000128245	ENSG00000185666	ENSG00000100284	ENSG00000100320	ENSG00000166862	ENSG00000100124	ENSG00000100156	ENSG00000168135	ENSG00000100321	ENSG00000128268	ENSG00000100335	ENSG00000100346	ENSG00000196588	ENSG00000128285	ENSG00000100372	ENSG00000100401	ENSG00000100418	ENSG00000198911	ENSG00000100167	ENSG00000100266	ENSG00000100271	ENSG00000100347	ENSG00000093000	ENSG00000075218	ENSG00000054611	ENSG00000219438	ENSG00000073150	ENSG00000008735	ENSG00000251322	ENSG00000146938	ENSG00000146950	ENSG00000073464	ENSG00000196459	ENSG00000101958	ENSG00000147003	ENSG00000182287	ENSG00000169891	ENSG00000008086	ENSG00000147010	ENSG00000130741	ENSG00000047597	ENSG00000147041	ENSG00000182220	ENSG00000147044	ENSG00000065923	ENSG00000102225	ENSG00000008056
GO:BP	ion transport	GO:0006811	7.87605e-09	8.10369	1610	5127	577	18123	ENSG00000078369,ENSG00000187730,ENSG00000069424,ENSG00000158286,ENSG00000198793,ENSG00000011021,ENSG00000175206,ENSG00000162494,ENSG00000186510,ENSG00000159363,ENSG00000133216,ENSG00000090020,ENSG00000116329,ENSG00000159023,ENSG00000121905,ENSG00000163873,ENSG00000117013,ENSG00000142959,ENSG00000187048,ENSG00000117834,ENSG00000169213,ENSG00000197147,ENSG00000085491,ENSG00000121940,ENSG00000181754…
GO:BP	postsynapse organization	GO:0099173	8.57594e-09	8.06672	170	5127	91	18123	ENSG00000107404,ENSG00000133216,ENSG00000157193,ENSG00000198929,ENSG00000197959,ENSG00000143761,ENSG00000179915,ENSG00000162951,ENSG00000170396,ENSG00000138443,ENSG00000116106,ENSG00000066248,ENSG00000130294,ENSG00000156959,ENSG00000172020,ENSG00000160145,ENSG00000154928,ENSG00000174953,ENSG00000169760,ENSG00000182580,ENSG00000198836,ENSG00000152208,ENSG00000109738,ENSG00000152413,ENSG00000146006…
GO:BP	chemical synaptic transmission, postsynaptic	GO:0099565	8.88038e-09	8.05157	110	5127	66	18123	ENSG00000107404,ENSG00000067606,ENSG00000160716,ENSG00000117152,ENSG00000179915,ENSG00000115839,ENSG00000082701,ENSG00000169760,ENSG00000145335,ENSG00000152208,ENSG00000138814,ENSG00000109738,ENSG00000145451,ENSG00000081189,ENSG00000112759,ENSG00000079841,ENSG00000164418,ENSG00000106089,ENSG00000158528,ENSG00000189056,ENSG00000157680,ENSG00000164885,ENSG00000120899,ENSG00000120903,ENSG00000176406…
GO:BP	glutamate receptor signaling pathway	GO:0007215	9.53089e-09	8.02087	54	5127	40	18123	ENSG00000163873,ENSG00000196277,ENSG00000164082,ENSG00000152208,ENSG00000120251,ENSG00000152413,ENSG00000155511,ENSG00000113262,ENSG00000124493,ENSG00000164418,ENSG00000152822,ENSG00000164535,ENSG00000179603,ENSG00000120899,ENSG00000106688,ENSG00000198785,ENSG00000260230,ENSG00000176884,ENSG00000134780,ENSG00000168959,ENSG00000152578,ENSG00000149403,ENSG00000273079,ENSG00000139874,ENSG00000103942…
GO:BP	positive regulation of cell projection organization	GO:0031346	1.32392e-08	7.87814	359	5127	162	18123	ENSG00000107404,ENSG00000198793,ENSG00000004487,ENSG00000174574,ENSG00000162374,ENSG00000157193,ENSG00000172260,ENSG00000137942,ENSG00000117598,ENSG00000181754,ENSG00000134259,ENSG00000143320,ENSG00000198400,ENSG00000197959,ENSG00000143322,ENSG00000116741,ENSG00000076356,ENSG00000119283,ENSG00000189292,ENSG00000119782,ENSG00000171094,ENSG00000119812,ENSG00000163171,ENSG00000119866,ENSG00000115091…
GO:BP	central nervous system development	GO:0007417	1.34629e-08	7.87086	1052	5127	397	18123	ENSG00000157933,ENSG00000197921,ENSG00000116254,ENSG00000198793,ENSG00000162490,ENSG00000162552,ENSG00000133216,ENSG00000004487,ENSG00000204178,ENSG00000117632,ENSG00000253368,ENSG00000121905,ENSG00000185668,ENSG00000116983,ENSG00000070785,ENSG00000123473,ENSG00000186094,ENSG00000162374,ENSG00000157193,ENSG00000157216,ENSG00000173406,ENSG00000117114,ENSG00000143013,ENSG00000143126,ENSG00000181754…
GO:BP	regulation of axonogenesis	GO:0050770	1.59473e-08	7.79731	159	5127	86	18123	ENSG00000162490,ENSG00000133216,ENSG00000173406,ENSG00000181754,ENSG00000134259,ENSG00000143434,ENSG00000196189,ENSG00000143320,ENSG00000076356,ENSG00000115310,ENSG00000119866,ENSG00000135622,ENSG00000128656,ENSG00000078018,ENSG00000116106,ENSG00000115694,ENSG00000144674,ENSG00000182606,ENSG00000247596,ENSG00000185008,ENSG00000169855,ENSG00000082701,ENSG00000082684,ENSG00000114554,ENSG00000182580…
GO:BP	phosphorus metabolic process	GO:0006793	1.61232e-08	7.79255	3014	5127	1008	18123	ENSG00000186891,ENSG00000107404,ENSG00000160075,ENSG00000067606,ENSG00000157881,ENSG00000197921,ENSG00000097021,ENSG00000162408,ENSG00000171735,ENSG00000198793,ENSG00000175206,ENSG00000120937,ENSG00000159363,ENSG00000162545,ENSG00000090432,ENSG00000070886,ENSG00000133216,ENSG00000117602,ENSG00000175087,ENSG00000117682,ENSG00000175793,ENSG00000130768,ENSG00000130766,ENSG00000116329,ENSG00000060656…
GO:BP	dendritic spine organization	GO:0097061	1.72621e-08	7.76291	84	5127	54	18123	ENSG00000107404,ENSG00000133216,ENSG00000157193,ENSG00000197959,ENSG00000143761,ENSG00000170396,ENSG00000138443,ENSG00000116106,ENSG00000066248,ENSG00000130294,ENSG00000160145,ENSG00000154928,ENSG00000174953,ENSG00000169760,ENSG00000182580,ENSG00000198836,ENSG00000152413,ENSG00000113758,ENSG00000136279,ENSG00000058404,ENSG00000158528,ENSG00000189056,ENSG00000164885,ENSG00000198576,ENSG00000138311…
GO:BP	neuron projection extension	GO:1990138	2.04042e-08	7.69028	172	5127	91	18123	ENSG00000107404,ENSG00000067606,ENSG00000162490,ENSG00000090432,ENSG00000143434,ENSG00000196189,ENSG00000143858,ENSG00000115310,ENSG00000119866,ENSG00000135622,ENSG00000114999,ENSG00000078018,ENSG00000144550,ENSG00000163539,ENSG00000144674,ENSG00000168036,ENSG00000247596,ENSG00000170017,ENSG00000082701,ENSG00000082684,ENSG00000114554,ENSG00000145147,ENSG00000131711,ENSG00000043143,ENSG00000055163…
GO:BP	multicellular organismal signaling	GO:0035637	2.13471e-08	7.67066	200	5127	102	18123	ENSG00000158286,ENSG00000175206,ENSG00000090020,ENSG00000116783,ENSG00000181656,ENSG00000177301,ENSG00000171385,ENSG00000163399,ENSG00000177628,ENSG00000143318,ENSG00000143153,ENSG00000058668,ENSG00000135750,ENSG00000198626,ENSG00000119782,ENSG00000171303,ENSG00000013016,ENSG00000183023,ENSG00000115041,ENSG00000162989,ENSG00000153253,ENSG00000136531,ENSG00000144285,ENSG00000169432,ENSG00000136546…
GO:BP	phosphate-containing compound metabolic process	GO:0006796	2.77257e-08	7.55712	2987	5127	998	18123	ENSG00000186891,ENSG00000107404,ENSG00000160075,ENSG00000067606,ENSG00000157881,ENSG00000197921,ENSG00000097021,ENSG00000162408,ENSG00000171735,ENSG00000198793,ENSG00000175206,ENSG00000120937,ENSG00000159363,ENSG00000162545,ENSG00000090432,ENSG00000070886,ENSG00000133216,ENSG00000117602,ENSG00000175087,ENSG00000117682,ENSG00000175793,ENSG00000130768,ENSG00000130766,ENSG00000116329,ENSG00000060656…
GO:BP	regulation of postsynapse organization	GO:0099175	4.16035e-08	7.38087	92	5127	57	18123	ENSG00000157193,ENSG00000197959,ENSG00000179915,ENSG00000162951,ENSG00000170396,ENSG00000138443,ENSG00000116106,ENSG00000066248,ENSG00000130294,ENSG00000160145,ENSG00000174953,ENSG00000169760,ENSG00000198836,ENSG00000152208,ENSG00000152413,ENSG00000146006,ENSG00000113758,ENSG00000156564,ENSG00000135333,ENSG00000136267,ENSG00000136279,ENSG00000058404,ENSG00000158528,ENSG00000189056,ENSG00000164885…
GO:BP	regulation of dendrite morphogenesis	GO:0048814	4.4107e-08	7.35549	68	5127	46	18123	ENSG00000157193,ENSG00000160716,ENSG00000124006,ENSG00000116106,ENSG00000008324,ENSG00000082701,ENSG00000160145,ENSG00000174953,ENSG00000198836,ENSG00000138814,ENSG00000109756,ENSG00000113758,ENSG00000044090,ENSG00000135298,ENSG00000002746,ENSG00000136279,ENSG00000058404,ENSG00000189056,ENSG00000061337,ENSG00000165802,ENSG00000171798,ENSG00000135387,ENSG00000137672,ENSG00000110888,ENSG00000087470…
GO:BP	protein localization to synapse	GO:0035418	4.81804e-08	7.31713	66	5127	45	18123	ENSG00000107404,ENSG00000067606,ENSG00000171603,ENSG00000143740,ENSG00000179915,ENSG00000168280,ENSG00000082126,ENSG00000144596,ENSG00000164061,ENSG00000169760,ENSG00000168993,ENSG00000168824,ENSG00000186472,ENSG00000008277,ENSG00000189056,ENSG00000164885,ENSG00000104219,ENSG00000108231,ENSG00000110076,ENSG00000150672,ENSG00000139182,ENSG00000161835,ENSG00000155980,ENSG00000155974,ENSG00000166963…
GO:BP	regulation of secretion	GO:0051046	5.8604e-08	7.23207	650	5127	261	18123	ENSG00000107404,ENSG00000175206,ENSG00000120937,ENSG00000132881,ENSG00000159363,ENSG00000162545,ENSG00000117016,ENSG00000187048,ENSG00000169213,ENSG00000177301,ENSG00000134207,ENSG00000159164,ENSG00000143457,ENSG00000160716,ENSG00000132718,ENSG00000198216,ENSG00000143858,ENSG00000117139,ENSG00000170498,ENSG00000143761,ENSG00000176887,ENSG00000163032,ENSG00000170745,ENSG00000115884,ENSG00000119782…
GO:BP	excitatory postsynaptic potential	GO:0060079	5.87292e-08	7.23115	104	5127	62	18123	ENSG00000107404,ENSG00000067606,ENSG00000160716,ENSG00000117152,ENSG00000179915,ENSG00000115839,ENSG00000082701,ENSG00000169760,ENSG00000145335,ENSG00000152208,ENSG00000138814,ENSG00000109738,ENSG00000145451,ENSG00000081189,ENSG00000112759,ENSG00000079841,ENSG00000164418,ENSG00000106089,ENSG00000158528,ENSG00000189056,ENSG00000157680,ENSG00000164885,ENSG00000120899,ENSG00000120903,ENSG00000176406…
GO:BP	establishment of localization in cell	GO:0051649	6.0359e-08	7.21926	2778	5127	932	18123	ENSG00000107404,ENSG00000067606,ENSG00000069424,ENSG00000158286,ENSG00000116237,ENSG00000188807,ENSG00000142655,ENSG00000175206,ENSG00000159363,ENSG00000162545,ENSG00000117245,ENSG00000179163,ENSG00000204160,ENSG00000175793,ENSG00000121769,ENSG00000025800,ENSG00000121905,ENSG00000131236,ENSG00000117016,ENSG00000178028,ENSG00000142945,ENSG00000186094,ENSG00000085832,ENSG00000169213,ENSG00000157077…
GO:BP	organic substance transport	GO:0071702	6.40286e-08	7.19363	2657	5127	895	18123	ENSG00000067606,ENSG00000116237,ENSG00000162426,ENSG00000171603,ENSG00000142655,ENSG00000204624,ENSG00000175206,ENSG00000132881,ENSG00000159363,ENSG00000162545,ENSG00000117245,ENSG00000204160,ENSG00000175793,ENSG00000130766,ENSG00000121769,ENSG00000025800,ENSG00000121905,ENSG00000178028,ENSG00000187048,ENSG00000117834,ENSG00000085832,ENSG00000169213,ENSG00000058804,ENSG00000162409,ENSG00000134709…
GO:BP	brain development	GO:0007420	9.29912e-08	7.03156	772	5127	301	18123	ENSG00000157933,ENSG00000197921,ENSG00000116254,ENSG00000198793,ENSG00000162490,ENSG00000162552,ENSG00000133216,ENSG00000004487,ENSG00000204178,ENSG00000117632,ENSG00000253368,ENSG00000121905,ENSG00000185668,ENSG00000070785,ENSG00000123473,ENSG00000162374,ENSG00000157193,ENSG00000157216,ENSG00000173406,ENSG00000117114,ENSG00000143126,ENSG00000181754,ENSG00000197106,ENSG00000134245,ENSG00000134198…
GO:BP	regulation of calcium ion-dependent exocytosis	GO:0017158	1.31703e-07	6.88041	41	5127	32	18123	ENSG00000134207,ENSG00000132718,ENSG00000143858,ENSG00000143761,ENSG00000115839,ENSG00000171450,ENSG00000186792,ENSG00000106089,ENSG00000188372,ENSG00000165125,ENSG00000164885,ENSG00000136854,ENSG00000204176,ENSG00000150594,ENSG00000019505,ENSG00000011347,ENSG00000173227,ENSG00000067715,ENSG00000174437,ENSG00000100505,ENSG00000198794,ENSG00000196557,ENSG00000149927,ENSG00000272636,ENSG00000006283…
GO:BP	regulation of amine transport	GO:0051952	1.70759e-07	6.76762	92	5127	56	18123	ENSG00000169213,ENSG00000177301,ENSG00000134207,ENSG00000159164,ENSG00000160716,ENSG00000132718,ENSG00000117152,ENSG00000116741,ENSG00000143858,ENSG00000274286,ENSG00000115839,ENSG00000132326,ENSG00000196277,ENSG00000157103,ENSG00000187094,ENSG00000164082,ENSG00000144746,ENSG00000170893,ENSG00000184160,ENSG00000145335,ENSG00000164129,ENSG00000184845,ENSG00000047579,ENSG00000135312,ENSG00000118432…
GO:BP	long-term synaptic potentiation	GO:0060291	2.02714e-07	6.69312	90	5127	55	18123	ENSG00000067606,ENSG00000133216,ENSG00000143740,ENSG00000118260,ENSG00000116106,ENSG00000082701,ENSG00000196549,ENSG00000169760,ENSG00000168824,ENSG00000145335,ENSG00000145632,ENSG00000146006,ENSG00000120727,ENSG00000169220,ENSG00000079689,ENSG00000204314,ENSG00000106113,ENSG00000164742,ENSG00000158528,ENSG00000189056,ENSG00000157764,ENSG00000104219,ENSG00000120899,ENSG00000104327,ENSG00000198576…
GO:BP	regulation of signaling	GO:0023051	2.51944e-07	6.5987	3669	5127	1195	18123	ENSG00000188976,ENSG00000107404,ENSG00000067606,ENSG00000157933,ENSG00000197921,ENSG00000158109,ENSG00000131697,ENSG00000116254,ENSG00000171680,ENSG00000171735,ENSG00000171603,ENSG00000198793,ENSG00000162490,ENSG00000175206,ENSG00000158747,ENSG00000169914,ENSG00000162545,ENSG00000090432,ENSG00000076864,ENSG00000162552,ENSG00000070886,ENSG00000133216,ENSG00000004487,ENSG00000117632,ENSG00000090020…
GO:BP	positive regulation of neuron projection development	GO:0010976	3.17793e-07	6.49786	166	5127	86	18123	ENSG00000107404,ENSG00000198793,ENSG00000004487,ENSG00000162374,ENSG00000157193,ENSG00000172260,ENSG00000117598,ENSG00000181754,ENSG00000198400,ENSG00000143322,ENSG00000116741,ENSG00000119283,ENSG00000189292,ENSG00000119782,ENSG00000171094,ENSG00000119866,ENSG00000170396,ENSG00000213672,ENSG00000247596,ENSG00000044524,ENSG00000160145,ENSG00000158092,ENSG00000174953,ENSG00000163536,ENSG00000163558…
GO:BP	head development	GO:0060322	3.33806e-07	6.47651	816	5127	313	18123	ENSG00000157933,ENSG00000197921,ENSG00000116254,ENSG00000198793,ENSG00000162490,ENSG00000162552,ENSG00000133216,ENSG00000004487,ENSG00000204178,ENSG00000117632,ENSG00000253368,ENSG00000121905,ENSG00000185668,ENSG00000070785,ENSG00000123473,ENSG00000162374,ENSG00000157193,ENSG00000157216,ENSG00000173406,ENSG00000117114,ENSG00000143126,ENSG00000181754,ENSG00000197106,ENSG00000134245,ENSG00000134198…
GO:BP	regulation of potassium ion transport	GO:0043266	3.94807e-07	6.40362	134	5127	73	18123	ENSG00000078369,ENSG00000069424,ENSG00000158286,ENSG00000175206,ENSG00000162494,ENSG00000181754,ENSG00000162728,ENSG00000198929,ENSG00000117152,ENSG00000143153,ENSG00000077522,ENSG00000115041,ENSG00000175497,ENSG00000162989,ENSG00000198648,ENSG00000135932,ENSG00000113851,ENSG00000172939,ENSG00000157388,ENSG00000069849,ENSG00000169282,ENSG00000197584,ENSG00000185774,ENSG00000145362,ENSG00000080709…
GO:BP	cardiac conduction	GO:0061337	5.12727e-07	6.29011	142	5127	76	18123	ENSG00000158286,ENSG00000175206,ENSG00000090020,ENSG00000116783,ENSG00000171385,ENSG00000163399,ENSG00000143318,ENSG00000143153,ENSG00000058668,ENSG00000135750,ENSG00000198626,ENSG00000119782,ENSG00000171303,ENSG00000013016,ENSG00000183023,ENSG00000115041,ENSG00000162989,ENSG00000114923,ENSG00000163273,ENSG00000150995,ENSG00000157087,ENSG00000183873,ENSG00000007402,ENSG00000157388,ENSG00000069849…
GO:BP	regulation of synaptic transmission, glutamatergic	GO:0051966	8.42736e-07	6.07431	72	5127	46	18123	ENSG00000158109,ENSG00000163873,ENSG00000198400,ENSG00000179915,ENSG00000115839,ENSG00000196277,ENSG00000164082,ENSG00000169760,ENSG00000152413,ENSG00000081189,ENSG00000184845,ENSG00000113262,ENSG00000124493,ENSG00000135312,ENSG00000118432,ENSG00000164418,ENSG00000152822,ENSG00000189056,ENSG00000179603,ENSG00000157680,ENSG00000164885,ENSG00000120899,ENSG00000136854,ENSG00000149091,ENSG00000162105…
GO:BP	positive regulation of dendrite morphogenesis	GO:0050775	9.00203e-07	6.04566	37	5127	29	18123	ENSG00000157193,ENSG00000124006,ENSG00000116106,ENSG00000008324,ENSG00000160145,ENSG00000174953,ENSG00000198836,ENSG00000113758,ENSG00000044090,ENSG00000136279,ENSG00000058404,ENSG00000189056,ENSG00000135387,ENSG00000110888,ENSG00000087470,ENSG00000111249,ENSG00000174989,ENSG00000137825,ENSG00000137817,ENSG00000103319,ENSG00000103264,ENSG00000007168,ENSG00000175866,ENSG00000105186,ENSG00000184402…
GO:BP	positive regulation of cellular component organization	GO:0051130	1.0785e-06	5.96718	1189	5127	431	18123	ENSG00000107404,ENSG00000131697,ENSG00000171603,ENSG00000198793,ENSG00000116786,ENSG00000090432,ENSG00000162552,ENSG00000133216,ENSG00000004487,ENSG00000175793,ENSG00000174574,ENSG00000269113,ENSG00000162374,ENSG00000157193,ENSG00000118473,ENSG00000172260,ENSG00000117114,ENSG00000137942,ENSG00000117598,ENSG00000116299,ENSG00000181754,ENSG00000134259,ENSG00000178104,ENSG00000213190,ENSG00000177628…
GO:BP	regulation of synapse assembly	GO:0051963	1.16672e-06	5.93304	100	5127	58	18123	ENSG00000171603,ENSG00000133216,ENSG00000117114,ENSG00000181754,ENSG00000160716,ENSG00000196189,ENSG00000198400,ENSG00000179915,ENSG00000162951,ENSG00000175928,ENSG00000156959,ENSG00000185008,ENSG00000154928,ENSG00000158258,ENSG00000121871,ENSG00000169760,ENSG00000182580,ENSG00000145335,ENSG00000152208,ENSG00000081189,ENSG00000146006,ENSG00000112139,ENSG00000135298,ENSG00000146242,ENSG00000135333…
GO:BP	dephosphorylation	GO:0016311	1.31426e-06	5.88132	504	5127	206	18123	ENSG00000160075,ENSG00000171735,ENSG00000198793,ENSG00000117602,ENSG00000060656,ENSG00000116981,ENSG00000116675,ENSG00000122484,ENSG00000117598,ENSG00000117600,ENSG00000122477,ENSG00000143079,ENSG00000155367,ENSG00000163399,ENSG00000143363,ENSG00000177628,ENSG00000081721,ENSG00000143155,ENSG00000162813,ENSG00000143507,ENSG00000162852,ENSG00000134318,ENSG00000119782,ENSG00000138032,ENSG00000221823…
GO:BP	positive regulation of dendritic spine morphogenesis	GO:0061003	1.36171e-06	5.86591	20	5127	19	18123	ENSG00000157193,ENSG00000160145,ENSG00000174953,ENSG00000198836,ENSG00000113758,ENSG00000136279,ENSG00000058404,ENSG00000189056,ENSG00000135387,ENSG00000110888,ENSG00000087470,ENSG00000111249,ENSG00000137825,ENSG00000103319,ENSG00000007168,ENSG00000175866,ENSG00000156299,ENSG00000198908,ENSG00000077264
GO:BP	intracellular transport	GO:0046907	1.49796e-06	5.8245	1723	5127	598	18123	ENSG00000067606,ENSG00000116237,ENSG00000188807,ENSG00000142655,ENSG00000159363,ENSG00000117245,ENSG00000204160,ENSG00000175793,ENSG00000121769,ENSG00000025800,ENSG00000121905,ENSG00000178028,ENSG00000186094,ENSG00000085832,ENSG00000157077,ENSG00000058804,ENSG00000162409,ENSG00000134709,ENSG00000203965,ENSG00000117155,ENSG00000137942,ENSG00000064703,ENSG00000134262,ENSG00000265808,ENSG00000174827…
GO:BP	developmental cell growth	GO:0048588	1.53304e-06	5.81445	236	5127	111	18123	ENSG00000107404,ENSG00000067606,ENSG00000198793,ENSG00000162490,ENSG00000175206,ENSG00000090432,ENSG00000134259,ENSG00000143434,ENSG00000196189,ENSG00000143320,ENSG00000117152,ENSG00000116741,ENSG00000143858,ENSG00000115310,ENSG00000119866,ENSG00000135622,ENSG00000114999,ENSG00000078018,ENSG00000144550,ENSG00000163539,ENSG00000144674,ENSG00000168036,ENSG00000247596,ENSG00000170017,ENSG00000082701…
GO:BP	positive regulation of synapse assembly	GO:0051965	1.80977e-06	5.74238	60	5127	40	18123	ENSG00000171603,ENSG00000133216,ENSG00000117114,ENSG00000181754,ENSG00000196189,ENSG00000198400,ENSG00000179915,ENSG00000175928,ENSG00000154928,ENSG00000158258,ENSG00000121871,ENSG00000169760,ENSG00000182580,ENSG00000152208,ENSG00000146006,ENSG00000135298,ENSG00000146242,ENSG00000173114,ENSG00000181790,ENSG00000174482,ENSG00000198739,ENSG00000214376,ENSG00000166159,ENSG00000139182,ENSG00000139211…
GO:BP	regulation of neuronal synaptic plasticity	GO:0048168	2.911e-06	5.53596	48	5127	34	18123	ENSG00000133216,ENSG00000020129,ENSG00000115839,ENSG00000144290,ENSG00000157404,ENSG00000145335,ENSG00000175471,ENSG00000070808,ENSG00000113758,ENSG00000197283,ENSG00000164418,ENSG00000058404,ENSG00000104219,ENSG00000147465,ENSG00000198576,ENSG00000165802,ENSG00000122877,ENSG00000107954,ENSG00000168959,ENSG00000149295,ENSG00000133703,ENSG00000156642,ENSG00000058335,ENSG00000237515,ENSG00000154118…
GO:BP	positive regulation of dendritic spine development	GO:0060999	3.05649e-06	5.51478	44	5127	32	18123	ENSG00000198793,ENSG00000204060,ENSG00000157193,ENSG00000143761,ENSG00000160145,ENSG00000174953,ENSG00000169760,ENSG00000198836,ENSG00000113758,ENSG00000136279,ENSG00000058404,ENSG00000158528,ENSG00000189056,ENSG00000107864,ENSG00000107954,ENSG00000110321,ENSG00000135387,ENSG00000162105,ENSG00000110888,ENSG00000087470,ENSG00000111249,ENSG00000137825,ENSG00000069956,ENSG00000103319,ENSG00000007168…
GO:BP	regulation of vesicle-mediated transport	GO:0060627	3.26457e-06	5.48617	544	5127	218	18123	ENSG00000107404,ENSG00000175206,ENSG00000132881,ENSG00000159363,ENSG00000121905,ENSG00000117016,ENSG00000169213,ENSG00000116675,ENSG00000118473,ENSG00000134207,ENSG00000132718,ENSG00000117533,ENSG00000143322,ENSG00000143858,ENSG00000143761,ENSG00000168118,ENSG00000077522,ENSG00000162852,ENSG00000163032,ENSG00000115884,ENSG00000162878,ENSG00000138078,ENSG00000179915,ENSG00000221823,ENSG00000115977…
GO:BP	positive regulation of transport	GO:0051050	3.29463e-06	5.48219	951	5127	352	18123	ENSG00000078369,ENSG00000067606,ENSG00000158286,ENSG00000175206,ENSG00000120937,ENSG00000162494,ENSG00000159363,ENSG00000162545,ENSG00000133216,ENSG00000175793,ENSG00000090020,ENSG00000121769,ENSG00000121905,ENSG00000178028,ENSG00000187048,ENSG00000169213,ENSG00000203965,ENSG00000118473,ENSG00000181754,ENSG00000174827,ENSG00000143457,ENSG00000143450,ENSG00000160716,ENSG00000162728,ENSG00000143318…
GO:BP	macromolecule modification	GO:0043412	3.30307e-06	5.48108	4345	5127	1385	18123	ENSG00000188976,ENSG00000186891,ENSG00000176022,ENSG00000107404,ENSG00000160075,ENSG00000067606,ENSG00000157933,ENSG00000197921,ENSG00000116254,ENSG00000116237,ENSG00000171735,ENSG00000130939,ENSG00000175279,ENSG00000142655,ENSG00000198793,ENSG00000116661,ENSG00000132879,ENSG00000177000,ENSG00000175206,ENSG00000116731,ENSG00000159363,ENSG00000169914,ENSG00000162545,ENSG00000090432,ENSG00000090686…
GO:BP	regulation of cell communication	GO:0010646	3.69969e-06	5.43183	3634	5127	1174	18123	ENSG00000188976,ENSG00000107404,ENSG00000067606,ENSG00000157933,ENSG00000197921,ENSG00000158109,ENSG00000131697,ENSG00000116254,ENSG00000171680,ENSG00000171735,ENSG00000171603,ENSG00000198793,ENSG00000162490,ENSG00000175206,ENSG00000158747,ENSG00000169914,ENSG00000162545,ENSG00000090432,ENSG00000076864,ENSG00000162552,ENSG00000070886,ENSG00000133216,ENSG00000004487,ENSG00000117632,ENSG00000090020…
GO:BP	regulation of neurogenesis	GO:0050767	3.84849e-06	5.41471	373	5127	159	18123	ENSG00000157933,ENSG00000197921,ENSG00000198793,ENSG00000162490,ENSG00000133216,ENSG00000004487,ENSG00000198492,ENSG00000157193,ENSG00000173406,ENSG00000181754,ENSG00000134259,ENSG00000143363,ENSG00000143434,ENSG00000196189,ENSG00000143320,ENSG00000076356,ENSG00000143507,ENSG00000176887,ENSG00000115738,ENSG00000115310,ENSG00000119866,ENSG00000135622,ENSG00000078018,ENSG00000079246,ENSG00000124006…
GO:BP	amine transport	GO:0015837	4.08419e-06	5.38889	100	5127	57	18123	ENSG00000169213,ENSG00000177301,ENSG00000134207,ENSG00000159164,ENSG00000160716,ENSG00000132718,ENSG00000117152,ENSG00000116741,ENSG00000143858,ENSG00000274286,ENSG00000115839,ENSG00000132326,ENSG00000196277,ENSG00000157103,ENSG00000187094,ENSG00000164082,ENSG00000144746,ENSG00000170893,ENSG00000184160,ENSG00000145335,ENSG00000164129,ENSG00000184845,ENSG00000047579,ENSG00000135312,ENSG00000118432…
GO:BP	associative learning	GO:0008306	4.2259e-06	5.37408	79	5127	48	18123	ENSG00000198793,ENSG00000162374,ENSG00000160716,ENSG00000159388,ENSG00000118260,ENSG00000157103,ENSG00000187094,ENSG00000157404,ENSG00000113161,ENSG00000184845,ENSG00000169220,ENSG00000197283,ENSG00000146242,ENSG00000006128,ENSG00000106236,ENSG00000189056,ENSG00000157764,ENSG00000164885,ENSG00000183117,ENSG00000085788,ENSG00000082556,ENSG00000106688,ENSG00000123454,ENSG00000176884,ENSG00000177963…
GO:BP	action potential	GO:0001508	4.40598e-06	5.35596	137	5127	72	18123	ENSG00000069424,ENSG00000158286,ENSG00000090020,ENSG00000181656,ENSG00000177301,ENSG00000171385,ENSG00000163399,ENSG00000160716,ENSG00000177628,ENSG00000198929,ENSG00000143153,ENSG00000198626,ENSG00000119782,ENSG00000183023,ENSG00000162989,ENSG00000153253,ENSG00000136531,ENSG00000144285,ENSG00000169432,ENSG00000136546,ENSG00000114923,ENSG00000152642,ENSG00000183873,ENSG00000157388,ENSG00000163681…
GO:BP	synaptic vesicle priming	GO:0016082	4.5887e-06	5.33831	19	5127	18	18123	ENSG00000159164,ENSG00000143740,ENSG00000115155,ENSG00000187672,ENSG00000145335,ENSG00000164506,ENSG00000106089,ENSG00000198722,ENSG00000136854,ENSG00000137766,ENSG00000099365,ENSG00000130477,ENSG00000105649,ENSG00000105402,ENSG00000132639,ENSG00000125814,ENSG00000159082,ENSG00000099940
GO:BP	organelle transport along microtubule	GO:0072384	5.32347e-06	5.27381	84	5127	50	18123	ENSG00000067606,ENSG00000188807,ENSG00000142655,ENSG00000186094,ENSG00000075945,ENSG00000084731,ENSG00000021574,ENSG00000138095,ENSG00000078018,ENSG00000118242,ENSG00000130294,ENSG00000182606,ENSG00000181789,ENSG00000198836,ENSG00000197386,ENSG00000154277,ENSG00000137463,ENSG00000131711,ENSG00000177879,ENSG00000131437,ENSG00000072803,ENSG00000047579,ENSG00000112290,ENSG00000158560,ENSG00000158623…
GO:BP	membrane depolarization during action potential	GO:0086010	6.95989e-06	5.1574	35	5127	27	18123	ENSG00000183023,ENSG00000153253,ENSG00000136531,ENSG00000144285,ENSG00000169432,ENSG00000136546,ENSG00000183873,ENSG00000157388,ENSG00000163681,ENSG00000145362,ENSG00000153956,ENSG00000055118,ENSG00000070159,ENSG00000165995,ENSG00000177098,ENSG00000149575,ENSG00000166257,ENSG00000151067,ENSG00000196876,ENSG00000138622,ENSG00000196557,ENSG00000108961,ENSG00000006283,ENSG00000007314,ENSG00000099822…
GO:BP	locomotory behavior	GO:0007626	7.1373e-06	5.14647	190	5127	92	18123	ENSG00000198793,ENSG00000116329,ENSG00000162374,ENSG00000173406,ENSG00000172260,ENSG00000181656,ENSG00000159208,ENSG00000160716,ENSG00000152092,ENSG00000115738,ENSG00000171094,ENSG00000171132,ENSG00000115317,ENSG00000153234,ENSG00000144290,ENSG00000144285,ENSG00000128683,ENSG00000003393,ENSG00000116106,ENSG00000113851,ENSG00000173175,ENSG00000160145,ENSG00000114279,ENSG00000154277,ENSG00000145335…
GO:BP	regulation of NMDA receptor activity	GO:2000310	7.86845e-06	5.10411	39	5127	29	18123	ENSG00000133216,ENSG00000077522,ENSG00000179915,ENSG00000169760,ENSG00000109819,ENSG00000120251,ENSG00000145708,ENSG00000081189,ENSG00000070808,ENSG00000155511,ENSG00000058404,ENSG00000189056,ENSG00000277586,ENSG00000120899,ENSG00000196730,ENSG00000176884,ENSG00000014216,ENSG00000174871,ENSG00000150672,ENSG00000152578,ENSG00000273079,ENSG00000058335,ENSG00000183454,ENSG00000132535,ENSG00000108370…
GO:BP	regulation of potassium ion transmembrane transport	GO:1901379	1.04031e-05	4.98284	119	5127	64	18123	ENSG00000078369,ENSG00000069424,ENSG00000158286,ENSG00000175206,ENSG00000162494,ENSG00000181754,ENSG00000162728,ENSG00000198929,ENSG00000117152,ENSG00000143153,ENSG00000077522,ENSG00000115041,ENSG00000175497,ENSG00000162989,ENSG00000198648,ENSG00000135932,ENSG00000113851,ENSG00000172939,ENSG00000157388,ENSG00000069849,ENSG00000169282,ENSG00000197584,ENSG00000185774,ENSG00000145362,ENSG00000080709…
GO:BP	neuron projection guidance	GO:0097485	1.07867e-05	4.96711	284	5127	126	18123	ENSG00000107404,ENSG00000162490,ENSG00000076864,ENSG00000070886,ENSG00000133216,ENSG00000183317,ENSG00000173406,ENSG00000162614,ENSG00000143434,ENSG00000143590,ENSG00000196189,ENSG00000198400,ENSG00000085552,ENSG00000058085,ENSG00000076356,ENSG00000157851,ENSG00000179915,ENSG00000170340,ENSG00000135622,ENSG00000168280,ENSG00000128656,ENSG00000118263,ENSG00000116106,ENSG00000063660,ENSG00000134121…
GO:BP	developmental growth involved in morphogenesis	GO:0060560	1.41465e-05	4.84935	238	5127	109	18123	ENSG00000107404,ENSG00000067606,ENSG00000162490,ENSG00000090432,ENSG00000134259,ENSG00000143434,ENSG00000196189,ENSG00000143320,ENSG00000143858,ENSG00000117139,ENSG00000115310,ENSG00000119866,ENSG00000135622,ENSG00000114999,ENSG00000078018,ENSG00000144550,ENSG00000163539,ENSG00000144674,ENSG00000168036,ENSG00000247596,ENSG00000170017,ENSG00000082701,ENSG00000082684,ENSG00000114554,ENSG00000145147…
GO:BP	positive regulation of potassium ion transport	GO:0043268	1.55453e-05	4.8084	72	5127	44	18123	ENSG00000078369,ENSG00000158286,ENSG00000175206,ENSG00000162494,ENSG00000181754,ENSG00000162728,ENSG00000198929,ENSG00000143153,ENSG00000077522,ENSG00000162989,ENSG00000198648,ENSG00000069849,ENSG00000197584,ENSG00000145362,ENSG00000080709,ENSG00000184845,ENSG00000204681,ENSG00000118507,ENSG00000055118,ENSG00000082556,ENSG00000165238,ENSG00000136928,ENSG00000156113,ENSG00000120049,ENSG00000150594…
GO:BP	synaptic transmission, GABAergic	GO:0051932	1.71336e-05	4.76615	48	5127	33	18123	ENSG00000171132,ENSG00000157103,ENSG00000154822,ENSG00000010322,ENSG00000169760,ENSG00000109158,ENSG00000109189,ENSG00000164129,ENSG00000109572,ENSG00000145864,ENSG00000145863,ENSG00000022355,ENSG00000113327,ENSG00000135312,ENSG00000146242,ENSG00000118432,ENSG00000006128,ENSG00000122733,ENSG00000136854,ENSG00000174576,ENSG00000149295,ENSG00000139182,ENSG00000133703,ENSG00000186297,ENSG00000182256…
GO:BP	axon guidance	GO:0007411	1.7193e-05	4.76465	283	5127	125	18123	ENSG00000107404,ENSG00000162490,ENSG00000076864,ENSG00000070886,ENSG00000133216,ENSG00000183317,ENSG00000173406,ENSG00000162614,ENSG00000143434,ENSG00000143590,ENSG00000196189,ENSG00000198400,ENSG00000085552,ENSG00000058085,ENSG00000076356,ENSG00000157851,ENSG00000179915,ENSG00000170340,ENSG00000135622,ENSG00000168280,ENSG00000128656,ENSG00000118263,ENSG00000116106,ENSG00000063660,ENSG00000134121…
GO:BP	microtubule polymerization or depolymerization	GO:0031109	2.00438e-05	4.69802	123	5127	65	18123	ENSG00000117632,ENSG00000142945,ENSG00000178104,ENSG00000143363,ENSG00000118200,ENSG00000154429,ENSG00000084764,ENSG00000138100,ENSG00000021574,ENSG00000204843,ENSG00000074054,ENSG00000078018,ENSG00000163539,ENSG00000145335,ENSG00000171368,ENSG00000068796,ENSG00000131711,ENSG00000134982,ENSG00000010017,ENSG00000112029,ENSG00000105976,ENSG00000015592,ENSG00000104435,ENSG00000070610,ENSG00000167110…
GO:BP	cellular protein modification process	GO:0006464	2.1138e-05	4.67494	4108	5127	1307	18123	ENSG00000188976,ENSG00000186891,ENSG00000176022,ENSG00000107404,ENSG00000160075,ENSG00000067606,ENSG00000157933,ENSG00000197921,ENSG00000116254,ENSG00000116237,ENSG00000171735,ENSG00000130939,ENSG00000175279,ENSG00000142655,ENSG00000198793,ENSG00000116661,ENSG00000132879,ENSG00000177000,ENSG00000175206,ENSG00000116731,ENSG00000159363,ENSG00000169914,ENSG00000162545,ENSG00000090432,ENSG00000090686…
GO:BP	protein modification process	GO:0036211	2.1138e-05	4.67494	4108	5127	1307	18123	ENSG00000188976,ENSG00000186891,ENSG00000176022,ENSG00000107404,ENSG00000160075,ENSG00000067606,ENSG00000157933,ENSG00000197921,ENSG00000116254,ENSG00000116237,ENSG00000171735,ENSG00000130939,ENSG00000175279,ENSG00000142655,ENSG00000198793,ENSG00000116661,ENSG00000132879,ENSG00000177000,ENSG00000175206,ENSG00000116731,ENSG00000159363,ENSG00000169914,ENSG00000162545,ENSG00000090432,ENSG00000090686…
GO:BP	organelle localization	GO:0051640	2.22001e-05	4.65365	657	5127	252	18123	ENSG00000067606,ENSG00000131697,ENSG00000188807,ENSG00000142655,ENSG00000198793,ENSG00000175206,ENSG00000116786,ENSG00000090432,ENSG00000142945,ENSG00000186094,ENSG00000169213,ENSG00000173406,ENSG00000137942,ENSG00000265808,ENSG00000136631,ENSG00000132718,ENSG00000075945,ENSG00000197959,ENSG00000120341,ENSG00000135823,ENSG00000117153,ENSG00000117724,ENSG00000116141,ENSG00000143786,ENSG00000143801…
GO:BP	response to catecholamine	GO:0071869	2.36168e-05	4.62678	106	5127	58	18123	ENSG00000078369,ENSG00000179546,ENSG00000090020,ENSG00000143630,ENSG00000143627,ENSG00000117152,ENSG00000135824,ENSG00000058668,ENSG00000198626,ENSG00000171094,ENSG00000179097,ENSG00000082701,ENSG00000173175,ENSG00000168824,ENSG00000109819,ENSG00000145335,ENSG00000145545,ENSG00000170091,ENSG00000184845,ENSG00000113749,ENSG00000047579,ENSG00000135312,ENSG00000168830,ENSG00000196591,ENSG00000185345…
GO:BP	response to monoamine	GO:0071867	2.36168e-05	4.62678	106	5127	58	18123	ENSG00000078369,ENSG00000179546,ENSG00000090020,ENSG00000143630,ENSG00000143627,ENSG00000117152,ENSG00000135824,ENSG00000058668,ENSG00000198626,ENSG00000171094,ENSG00000179097,ENSG00000082701,ENSG00000173175,ENSG00000168824,ENSG00000109819,ENSG00000145335,ENSG00000145545,ENSG00000170091,ENSG00000184845,ENSG00000113749,ENSG00000047579,ENSG00000135312,ENSG00000168830,ENSG00000196591,ENSG00000185345…
GO:BP	receptor localization to synapse	GO:0097120	2.38002e-05	4.62342	57	5127	37	18123	ENSG00000067606,ENSG00000171603,ENSG00000117245,ENSG00000143740,ENSG00000179915,ENSG00000168280,ENSG00000144596,ENSG00000169760,ENSG00000168993,ENSG00000168824,ENSG00000113758,ENSG00000008277,ENSG00000189056,ENSG00000108231,ENSG00000174871,ENSG00000150672,ENSG00000161835,ENSG00000155980,ENSG00000155974,ENSG00000185046,ENSG00000171723,ENSG00000156642,ENSG00000006116,ENSG00000099365,ENSG00000132535…
GO:BP	calcium ion transmembrane transport	GO:0070588	2.58551e-05	4.58745	327	5127	140	18123	ENSG00000175206,ENSG00000090020,ENSG00000121905,ENSG00000143318,ENSG00000198929,ENSG00000143184,ENSG00000143153,ENSG00000198216,ENSG00000058668,ENSG00000143801,ENSG00000198626,ENSG00000119782,ENSG00000013016,ENSG00000183023,ENSG00000171132,ENSG00000182389,ENSG00000115840,ENSG00000150995,ENSG00000157087,ENSG00000144681,ENSG00000007402,ENSG00000213533,ENSG00000157388,ENSG00000157445,ENSG00000017260…
GO:BP	regulation of protein localization	GO:0032880	3.28982e-05	4.48283	912	5127	334	18123	ENSG00000107404,ENSG00000067606,ENSG00000069424,ENSG00000116786,ENSG00000159363,ENSG00000162545,ENSG00000133216,ENSG00000004487,ENSG00000175793,ENSG00000130766,ENSG00000159023,ENSG00000121905,ENSG00000178028,ENSG00000116209,ENSG00000162409,ENSG00000203965,ENSG00000143126,ENSG00000174827,ENSG00000143457,ENSG00000143450,ENSG00000132718,ENSG00000163468,ENSG00000152332,ENSG00000198821,ENSG00000152061…
GO:BP	regulation of synaptic vesicle recycling	GO:1903421	3.50936e-05	4.45477	27	5127	22	18123	ENSG00000132718,ENSG00000117533,ENSG00000197959,ENSG00000169760,ENSG00000161203,ENSG00000145214,ENSG00000145335,ENSG00000183826,ENSG00000164885,ENSG00000137055,ENSG00000106976,ENSG00000136827,ENSG00000107758,ENSG00000087470,ENSG00000188906,ENSG00000102466,ENSG00000198668,ENSG00000099365,ENSG00000220205,ENSG00000160014,ENSG00000104888,ENSG00000068400
GO:BP	regulation of AMPA receptor activity	GO:2000311	3.50936e-05	4.45477	27	5127	22	18123	ENSG00000143786,ENSG00000179915,ENSG00000169760,ENSG00000081189,ENSG00000204314,ENSG00000189056,ENSG00000198576,ENSG00000174871,ENSG00000162105,ENSG00000237515,ENSG00000006116,ENSG00000169181,ENSG00000141503,ENSG00000169992,ENSG00000075429,ENSG00000075461,ENSG00000161681,ENSG00000105605,ENSG00000142408,ENSG00000166862,ENSG00000008735,ENSG00000251322
GO:BP	positive regulation of neurogenesis	GO:0050769	3.54891e-05	4.4499	233	5127	106	18123	ENSG00000198793,ENSG00000133216,ENSG00000004487,ENSG00000157193,ENSG00000181754,ENSG00000134259,ENSG00000143320,ENSG00000076356,ENSG00000176887,ENSG00000115738,ENSG00000119866,ENSG00000079246,ENSG00000124006,ENSG00000116106,ENSG00000115694,ENSG00000144674,ENSG00000168036,ENSG00000182606,ENSG00000008324,ENSG00000247596,ENSG00000185008,ENSG00000169855,ENSG00000160145,ENSG00000114554,ENSG00000174953…
GO:BP	cellular response to monoamine stimulus	GO:0071868	3.59942e-05	4.44377	102	5127	56	18123	ENSG00000078369,ENSG00000179546,ENSG00000090020,ENSG00000143630,ENSG00000143627,ENSG00000117152,ENSG00000135824,ENSG00000058668,ENSG00000198626,ENSG00000171094,ENSG00000179097,ENSG00000082701,ENSG00000173175,ENSG00000168824,ENSG00000145335,ENSG00000145545,ENSG00000170091,ENSG00000184845,ENSG00000113749,ENSG00000047579,ENSG00000135312,ENSG00000168830,ENSG00000196591,ENSG00000185345,ENSG00000181072…
GO:BP	cellular response to catecholamine stimulus	GO:0071870	3.59942e-05	4.44377	102	5127	56	18123	ENSG00000078369,ENSG00000179546,ENSG00000090020,ENSG00000143630,ENSG00000143627,ENSG00000117152,ENSG00000135824,ENSG00000058668,ENSG00000198626,ENSG00000171094,ENSG00000179097,ENSG00000082701,ENSG00000173175,ENSG00000168824,ENSG00000145335,ENSG00000145545,ENSG00000170091,ENSG00000184845,ENSG00000113749,ENSG00000047579,ENSG00000135312,ENSG00000168830,ENSG00000196591,ENSG00000185345,ENSG00000181072…
GO:BP	regulation of postsynaptic membrane neurotransmitter receptor levels	GO:0099072	4.04957e-05	4.39259	69	5127	42	18123	ENSG00000067606,ENSG00000171603,ENSG00000121905,ENSG00000085832,ENSG00000197959,ENSG00000143740,ENSG00000221823,ENSG00000144596,ENSG00000163558,ENSG00000161203,ENSG00000168993,ENSG00000168824,ENSG00000109189,ENSG00000008277,ENSG00000157168,ENSG00000198576,ENSG00000260230,ENSG00000106976,ENSG00000108231,ENSG00000130643,ENSG00000161835,ENSG00000155974,ENSG00000171723,ENSG00000006116,ENSG00000169181…
GO:BP	positive regulation of cation transmembrane transport	GO:1904064	4.08254e-05	4.38907	174	5127	84	18123	ENSG00000078369,ENSG00000158286,ENSG00000175206,ENSG00000162494,ENSG00000133216,ENSG00000090020,ENSG00000181754,ENSG00000174827,ENSG00000162728,ENSG00000143318,ENSG00000198929,ENSG00000143184,ENSG00000143153,ENSG00000143761,ENSG00000077522,ENSG00000198626,ENSG00000013016,ENSG00000162989,ENSG00000144681,ENSG00000213533,ENSG00000069849,ENSG00000197584,ENSG00000197386,ENSG00000109689,ENSG00000145335…
GO:BP	microtubule polymerization	GO:0046785	4.1223e-05	4.38486	83	5127	48	18123	ENSG00000117632,ENSG00000178104,ENSG00000143363,ENSG00000118200,ENSG00000084764,ENSG00000204843,ENSG00000074054,ENSG00000078018,ENSG00000163539,ENSG00000145335,ENSG00000171368,ENSG00000131711,ENSG00000010017,ENSG00000112029,ENSG00000105976,ENSG00000104435,ENSG00000070610,ENSG00000167110,ENSG00000130559,ENSG00000130640,ENSG00000175216,ENSG00000149269,ENSG00000004478,ENSG00000111276,ENSG00000067798…
GO:BP	synaptic vesicle localization	GO:0097479	4.78155e-05	4.32043	58	5127	37	18123	ENSG00000197959,ENSG00000143761,ENSG00000179915,ENSG00000168280,ENSG00000078018,ENSG00000157152,ENSG00000168036,ENSG00000169760,ENSG00000145335,ENSG00000177879,ENSG00000047579,ENSG00000065609,ENSG00000185345,ENSG00000186472,ENSG00000164885,ENSG00000092964,ENSG00000070718,ENSG00000106976,ENSG00000136827,ENSG00000185009,ENSG00000174672,ENSG00000174871,ENSG00000165714,ENSG00000188906,ENSG00000155980…
GO:BP	catecholamine secretion	GO:0050432	4.78155e-05	4.32043	58	5127	37	18123	ENSG00000177301,ENSG00000134207,ENSG00000160716,ENSG00000132718,ENSG00000143858,ENSG00000274286,ENSG00000164082,ENSG00000010322,ENSG00000184160,ENSG00000145335,ENSG00000047579,ENSG00000135312,ENSG00000118432,ENSG00000185345,ENSG00000106089,ENSG00000082556,ENSG00000160932,ENSG00000204176,ENSG00000173267,ENSG00000150594,ENSG00000019505,ENSG00000011347,ENSG00000173227,ENSG00000173020,ENSG00000149295…
GO:BP	calcium ion-regulated exocytosis of neurotransmitter	GO:0048791	5.16556e-05	4.28688	17	5127	16	18123	ENSG00000117016,ENSG00000134207,ENSG00000143858,ENSG00000115839,ENSG00000079841,ENSG00000176406,ENSG00000198722,ENSG00000136854,ENSG00000011347,ENSG00000067715,ENSG00000174437,ENSG00000137766,ENSG00000099365,ENSG00000272636,ENSG00000130477,ENSG00000129990
GO:BP	multicellular organism development	GO:0007275	5.68843e-05	4.24501	5670	5127	1759	18123	ENSG00000186891,ENSG00000107404,ENSG00000189339,ENSG00000078369,ENSG00000067606,ENSG00000157933,ENSG00000197921,ENSG00000196581,ENSG00000131697,ENSG00000116254,ENSG00000158286,ENSG00000171603,ENSG00000198793,ENSG00000171819,ENSG00000204624,ENSG00000162490,ENSG00000177000,ENSG00000175206,ENSG00000120937,ENSG00000116731,ENSG00000189337,ENSG00000158747,ENSG00000090432,ENSG00000076864,ENSG00000162552…
GO:BP	positive regulation of potassium ion transmembrane transport	GO:1901381	5.70915e-05	4.24343	65	5127	40	18123	ENSG00000078369,ENSG00000158286,ENSG00000175206,ENSG00000162494,ENSG00000181754,ENSG00000162728,ENSG00000198929,ENSG00000143153,ENSG00000077522,ENSG00000162989,ENSG00000069849,ENSG00000197584,ENSG00000145362,ENSG00000080709,ENSG00000204681,ENSG00000118507,ENSG00000055118,ENSG00000082556,ENSG00000165238,ENSG00000136928,ENSG00000156113,ENSG00000120049,ENSG00000006071,ENSG00000129159,ENSG00000183908…
GO:BP	exocytic process	GO:0140029	6.09149e-05	4.21528	79	5127	46	18123	ENSG00000175206,ENSG00000169213,ENSG00000159164,ENSG00000136631,ENSG00000143740,ENSG00000115155,ENSG00000144118,ENSG00000187672,ENSG00000178750,ENSG00000169760,ENSG00000168993,ENSG00000184178,ENSG00000145335,ENSG00000152932,ENSG00000145920,ENSG00000164506,ENSG00000106089,ENSG00000131558,ENSG00000158856,ENSG00000198722,ENSG00000136854,ENSG00000138190,ENSG00000137501,ENSG00000160695,ENSG00000067715…
GO:BP	membrane depolarization	GO:0051899	7.73917e-05	4.11131	89	5127	50	18123	ENSG00000067606,ENSG00000126709,ENSG00000177606,ENSG00000213190,ENSG00000160716,ENSG00000198216,ENSG00000183023,ENSG00000182389,ENSG00000153253,ENSG00000136531,ENSG00000144285,ENSG00000169432,ENSG00000136546,ENSG00000152642,ENSG00000183873,ENSG00000187094,ENSG00000157388,ENSG00000163681,ENSG00000114279,ENSG00000145362,ENSG00000145349,ENSG00000153956,ENSG00000055118,ENSG00000070159,ENSG00000148408…
GO:BP	organelle organization	GO:0006996	8.3868e-05	4.0764	4136	5127	1309	18123	ENSG00000188976,ENSG00000107404,ENSG00000067606,ENSG00000157933,ENSG00000169598,ENSG00000131697,ENSG00000116254,ENSG00000187017,ENSG00000116273,ENSG00000007923,ENSG00000188807,ENSG00000175279,ENSG00000241563,ENSG00000142655,ENSG00000198793,ENSG00000177000,ENSG00000116731,ENSG00000116786,ENSG00000132881,ENSG00000159363,ENSG00000090432,ENSG00000117245,ENSG00000162552,ENSG00000004487,ENSG00000001460…
GO:BP	intracellular protein transport	GO:0006886	9.00112e-05	4.0457	995	5127	358	18123	ENSG00000116237,ENSG00000142655,ENSG00000159363,ENSG00000204160,ENSG00000175793,ENSG00000025800,ENSG00000121905,ENSG00000178028,ENSG00000203965,ENSG00000134262,ENSG00000174827,ENSG00000131779,ENSG00000136631,ENSG00000143376,ENSG00000143450,ENSG00000122218,ENSG00000158882,ENSG00000152332,ENSG00000143153,ENSG00000152061,ENSG00000120341,ENSG00000135823,ENSG00000198700,ENSG00000143761,ENSG00000173726…
GO:BP	central nervous system neuron development	GO:0021954	9.50049e-05	4.02225	87	5127	49	18123	ENSG00000162490,ENSG00000133216,ENSG00000186094,ENSG00000177551,ENSG00000160716,ENSG00000159388,ENSG00000153234,ENSG00000144290,ENSG00000078018,ENSG00000116106,ENSG00000185008,ENSG00000169855,ENSG00000154928,ENSG00000182580,ENSG00000174013,ENSG00000145147,ENSG00000109756,ENSG00000184845,ENSG00000096384,ENSG00000122585,ENSG00000105953,ENSG00000075213,ENSG00000221866,ENSG00000164885,ENSG00000070610…
GO:BP	positive regulation of calcium ion-dependent exocytosis	GO:0045956	0.000107483	3.96866	19	5127	17	18123	ENSG00000143761,ENSG00000171450,ENSG00000186792,ENSG00000106089,ENSG00000188372,ENSG00000164885,ENSG00000136854,ENSG00000011347,ENSG00000067715,ENSG00000198794,ENSG00000196557,ENSG00000272636,ENSG00000006283,ENSG00000132872,ENSG00000158445,ENSG00000100346,ENSG00000147003
GO:BP	axo-dendritic transport	GO:0008088	0.00010839	3.96501	73	5127	43	18123	ENSG00000117245,ENSG00000186094,ENSG00000021574,ENSG00000168280,ENSG00000078018,ENSG00000130294,ENSG00000182606,ENSG00000198836,ENSG00000154277,ENSG00000137463,ENSG00000177879,ENSG00000131437,ENSG00000185129,ENSG00000072803,ENSG00000047579,ENSG00000112290,ENSG00000277586,ENSG00000070718,ENSG00000147642,ENSG00000107282,ENSG00000135049,ENSG00000185009,ENSG00000130643,ENSG00000174871,ENSG00000150672…
GO:BP	adult behavior	GO:0030534	0.000114508	3.94117	135	5127	68	18123	ENSG00000116329,ENSG00000173406,ENSG00000160716,ENSG00000171094,ENSG00000179915,ENSG00000115317,ENSG00000153234,ENSG00000144285,ENSG00000116106,ENSG00000164082,ENSG00000160145,ENSG00000114279,ENSG00000154277,ENSG00000109189,ENSG00000145335,ENSG00000109738,ENSG00000109572,ENSG00000145708,ENSG00000152413,ENSG00000113327,ENSG00000184845,ENSG00000204371,ENSG00000183826,ENSG00000196591,ENSG00000185345…
GO:BP	positive regulation of excitatory postsynaptic potential	GO:2000463	0.000119743	3.92175	28	5127	22	18123	ENSG00000107404,ENSG00000067606,ENSG00000117152,ENSG00000179915,ENSG00000169760,ENSG00000079841,ENSG00000106089,ENSG00000189056,ENSG00000120899,ENSG00000176406,ENSG00000176884,ENSG00000162105,ENSG00000167535,ENSG00000111249,ENSG00000175344,ENSG00000099365,ENSG00000132535,ENSG00000169992,ENSG00000175866,ENSG00000166342,ENSG00000161681,ENSG00000251322
GO:BP	cell junction assembly	GO:0034329	0.000122965	3.91022	442	5127	177	18123	ENSG00000107404,ENSG00000131697,ENSG00000171603,ENSG00000162552,ENSG00000133216,ENSG00000090020,ENSG00000132849,ENSG00000117114,ENSG00000181754,ENSG00000160716,ENSG00000196189,ENSG00000198400,ENSG00000197959,ENSG00000058085,ENSG00000196878,ENSG00000077522,ENSG00000119185,ENSG00000134318,ENSG00000179915,ENSG00000143951,ENSG00000075340,ENSG00000162951,ENSG00000074054,ENSG00000178568,ENSG00000124006…
GO:BP	regulation of dopamine secretion	GO:0014059	0.000142589	3.84591	36	5127	26	18123	ENSG00000177301,ENSG00000134207,ENSG00000160716,ENSG00000132718,ENSG00000143858,ENSG00000164082,ENSG00000145335,ENSG00000047579,ENSG00000135312,ENSG00000118432,ENSG00000185345,ENSG00000082556,ENSG00000204176,ENSG00000173267,ENSG00000019505,ENSG00000011347,ENSG00000173227,ENSG00000149295,ENSG00000067715,ENSG00000102468,ENSG00000183044,ENSG00000132872,ENSG00000105649,ENSG00000213023,ENSG00000129990…
GO:BP	dopamine secretion	GO:0014046	0.000142589	3.84591	36	5127	26	18123	ENSG00000177301,ENSG00000134207,ENSG00000160716,ENSG00000132718,ENSG00000143858,ENSG00000164082,ENSG00000145335,ENSG00000047579,ENSG00000135312,ENSG00000118432,ENSG00000185345,ENSG00000082556,ENSG00000204176,ENSG00000173267,ENSG00000019505,ENSG00000011347,ENSG00000173227,ENSG00000149295,ENSG00000067715,ENSG00000102468,ENSG00000183044,ENSG00000132872,ENSG00000105649,ENSG00000213023,ENSG00000129990…
GO:BP	regulation of cell development	GO:0060284	0.000159529	3.79716	509	5127	199	18123	ENSG00000157933,ENSG00000197921,ENSG00000198793,ENSG00000162490,ENSG00000133216,ENSG00000004487,ENSG00000198492,ENSG00000117400,ENSG00000157193,ENSG00000173406,ENSG00000181754,ENSG00000134259,ENSG00000143363,ENSG00000143434,ENSG00000196189,ENSG00000143320,ENSG00000122180,ENSG00000076356,ENSG00000143507,ENSG00000176887,ENSG00000115738,ENSG00000119185,ENSG00000134318,ENSG00000115310,ENSG00000119866…
GO:BP	positive regulation of ion transport	GO:0043270	0.000174628	3.75789	301	5127	128	18123	ENSG00000078369,ENSG00000158286,ENSG00000175206,ENSG00000162494,ENSG00000133216,ENSG00000090020,ENSG00000187048,ENSG00000169213,ENSG00000181754,ENSG00000174827,ENSG00000160716,ENSG00000162728,ENSG00000143318,ENSG00000198929,ENSG00000143184,ENSG00000143153,ENSG00000143761,ENSG00000077522,ENSG00000198626,ENSG00000013016,ENSG00000115839,ENSG00000162989,ENSG00000153246,ENSG00000198648,ENSG00000157103…
GO:BP	protein localization to cell periphery	GO:1990778	0.000199427	3.70022	339	5127	141	18123	ENSG00000067606,ENSG00000171603,ENSG00000133216,ENSG00000159023,ENSG00000169213,ENSG00000116209,ENSG00000203965,ENSG00000174827,ENSG00000143457,ENSG00000143153,ENSG00000117475,ENSG00000058668,ENSG00000143740,ENSG00000077522,ENSG00000162852,ENSG00000119185,ENSG00000134318,ENSG00000084710,ENSG00000013016,ENSG00000162878,ENSG00000138078,ENSG00000171132,ENSG00000179915,ENSG00000115041,ENSG00000175497…
GO:BP	telencephalon development	GO:0021537	0.00019984	3.69932	259	5127	113	18123	ENSG00000157933,ENSG00000197921,ENSG00000162490,ENSG00000133216,ENSG00000004487,ENSG00000070785,ENSG00000157193,ENSG00000173406,ENSG00000171943,ENSG00000159388,ENSG00000058668,ENSG00000115738,ENSG00000084676,ENSG00000171094,ENSG00000183023,ENSG00000138083,ENSG00000115310,ENSG00000178568,ENSG00000171450,ENSG00000077092,ENSG00000183873,ENSG00000168036,ENSG00000185008,ENSG00000169855,ENSG00000082701…
GO:BP	forebrain development	GO:0030900	0.00022112	3.65537	392	5127	159	18123	ENSG00000157933,ENSG00000197921,ENSG00000116254,ENSG00000162490,ENSG00000162552,ENSG00000133216,ENSG00000004487,ENSG00000185668,ENSG00000070785,ENSG00000123473,ENSG00000162374,ENSG00000157193,ENSG00000173406,ENSG00000134245,ENSG00000177551,ENSG00000171943,ENSG00000160716,ENSG00000159388,ENSG00000058668,ENSG00000115738,ENSG00000084676,ENSG00000171094,ENSG00000183023,ENSG00000138083,ENSG00000115310…
GO:BP	positive regulation of neurotransmitter transport	GO:0051590	0.000236892	3.62545	23	5127	19	18123	ENSG00000169213,ENSG00000115839,ENSG00000169760,ENSG00000145335,ENSG00000047579,ENSG00000118432,ENSG00000185345,ENSG00000106089,ENSG00000164885,ENSG00000136854,ENSG00000165995,ENSG00000075073,ENSG00000149295,ENSG00000087470,ENSG00000050438,ENSG00000067715,ENSG00000007516,ENSG00000099365,ENSG00000128271
GO:BP	response to organonitrogen compound	GO:0010243	0.000245333	3.61024	1092	5127	386	18123	ENSG00000078369,ENSG00000067606,ENSG00000130939,ENSG00000198793,ENSG00000116661,ENSG00000132879,ENSG00000177000,ENSG00000175206,ENSG00000004487,ENSG00000179546,ENSG00000090020,ENSG00000142784,ENSG00000130766,ENSG00000121769,ENSG00000121905,ENSG00000126067,ENSG00000116954,ENSG00000070785,ENSG00000117461,ENSG00000162374,ENSG00000177606,ENSG00000142875,ENSG00000181754,ENSG00000160716,ENSG00000143630…
GO:BP	modulation of excitatory postsynaptic potential	GO:0098815	0.000246009	3.60905	45	5127	30	18123	ENSG00000107404,ENSG00000067606,ENSG00000117152,ENSG00000179915,ENSG00000169760,ENSG00000079841,ENSG00000106089,ENSG00000189056,ENSG00000120899,ENSG00000176406,ENSG00000176884,ENSG00000162105,ENSG00000149582,ENSG00000188906,ENSG00000167535,ENSG00000111249,ENSG00000100678,ENSG00000175344,ENSG00000099365,ENSG00000102924,ENSG00000132535,ENSG00000169992,ENSG00000175866,ENSG00000101489,ENSG00000166342…
GO:BP	regulation of catecholamine secretion	GO:0050433	0.000246171	3.60876	56	5127	35	18123	ENSG00000177301,ENSG00000134207,ENSG00000160716,ENSG00000132718,ENSG00000143858,ENSG00000274286,ENSG00000164082,ENSG00000184160,ENSG00000145335,ENSG00000047579,ENSG00000135312,ENSG00000118432,ENSG00000185345,ENSG00000106089,ENSG00000082556,ENSG00000204176,ENSG00000173267,ENSG00000150594,ENSG00000019505,ENSG00000011347,ENSG00000173227,ENSG00000173020,ENSG00000149295,ENSG00000067715,ENSG00000102468…
GO:BP	regulation of system process	GO:0044057	0.000258314	3.58785	621	5127	235	18123	ENSG00000107404,ENSG00000067606,ENSG00000158286,ENSG00000198793,ENSG00000175206,ENSG00000120937,ENSG00000090020,ENSG00000116329,ENSG00000159023,ENSG00000116544,ENSG00000116783,ENSG00000171385,ENSG00000163399,ENSG00000177628,ENSG00000143318,ENSG00000198929,ENSG00000117152,ENSG00000143153,ENSG00000116741,ENSG00000122180,ENSG00000058668,ENSG00000170498,ENSG00000135750,ENSG00000198626,ENSG00000134318…
GO:BP	synaptic vesicle recycling	GO:0036465	0.000262175	3.58141	77	5127	44	18123	ENSG00000116675,ENSG00000132718,ENSG00000117533,ENSG00000197959,ENSG00000143858,ENSG00000169760,ENSG00000161203,ENSG00000145214,ENSG00000145335,ENSG00000074317,ENSG00000124507,ENSG00000183826,ENSG00000065609,ENSG00000078053,ENSG00000106089,ENSG00000164885,ENSG00000107295,ENSG00000137055,ENSG00000119522,ENSG00000106976,ENSG00000136827,ENSG00000107758,ENSG00000173267,ENSG00000011347,ENSG00000087470…
GO:BP	cell growth	GO:0016049	0.000266759	3.57388	497	5127	194	18123	ENSG00000107404,ENSG00000067606,ENSG00000171603,ENSG00000198793,ENSG00000162490,ENSG00000175206,ENSG00000120937,ENSG00000090432,ENSG00000175793,ENSG00000090020,ENSG00000130766,ENSG00000117425,ENSG00000134259,ENSG00000143434,ENSG00000196189,ENSG00000143320,ENSG00000132694,ENSG00000117152,ENSG00000116741,ENSG00000134371,ENSG00000143858,ENSG00000168243,ENSG00000115310,ENSG00000119866,ENSG00000135622…
GO:BP	neurotransmitter receptor transport	GO:0099637	0.000335095	3.47483	27	5127	21	18123	ENSG00000171603,ENSG00000143740,ENSG00000144596,ENSG00000168993,ENSG00000168824,ENSG00000106688,ENSG00000161835,ENSG00000155974,ENSG00000006116,ENSG00000099365,ENSG00000069329,ENSG00000220205,ENSG00000006740,ENSG00000075429,ENSG00000075461,ENSG00000065000,ENSG00000105605,ENSG00000142408,ENSG00000132639,ENSG00000166862,ENSG00000068400
GO:BP	positive regulation of neurotransmitter secretion	GO:0001956	0.000341543	3.46656	18	5127	16	18123	ENSG00000115839,ENSG00000169760,ENSG00000145335,ENSG00000047579,ENSG00000118432,ENSG00000106089,ENSG00000164885,ENSG00000136854,ENSG00000165995,ENSG00000075073,ENSG00000087470,ENSG00000050438,ENSG00000067715,ENSG00000007516,ENSG00000099365,ENSG00000128271
GO:BP	positive regulation of transmembrane transport	GO:0034764	0.00039182	3.40691	242	5127	106	18123	ENSG00000078369,ENSG00000158286,ENSG00000175206,ENSG00000162494,ENSG00000133216,ENSG00000090020,ENSG00000181754,ENSG00000174827,ENSG00000162728,ENSG00000143318,ENSG00000198929,ENSG00000143184,ENSG00000143153,ENSG00000143761,ENSG00000077522,ENSG00000198626,ENSG00000054277,ENSG00000013016,ENSG00000162989,ENSG00000198648,ENSG00000169047,ENSG00000178752,ENSG00000144681,ENSG00000213533,ENSG00000069849…
GO:BP	vesicle localization	GO:0051648	0.000391942	3.40678	228	5127	101	18123	ENSG00000067606,ENSG00000137942,ENSG00000265808,ENSG00000132718,ENSG00000075945,ENSG00000197959,ENSG00000120341,ENSG00000117153,ENSG00000143786,ENSG00000143761,ENSG00000180398,ENSG00000179915,ENSG00000074054,ENSG00000168280,ENSG00000078018,ENSG00000118242,ENSG00000036257,ENSG00000130294,ENSG00000157152,ENSG00000163539,ENSG00000168036,ENSG00000182606,ENSG00000113966,ENSG00000169760,ENSG00000174007…
GO:BP	regulation of microtubule polymerization or depolymerization	GO:0031110	0.000401174	3.39667	90	5127	49	18123	ENSG00000117632,ENSG00000178104,ENSG00000143363,ENSG00000118200,ENSG00000084764,ENSG00000138100,ENSG00000021574,ENSG00000204843,ENSG00000074054,ENSG00000078018,ENSG00000163539,ENSG00000145335,ENSG00000131711,ENSG00000134982,ENSG00000105976,ENSG00000015592,ENSG00000104435,ENSG00000070610,ENSG00000130559,ENSG00000175216,ENSG00000149269,ENSG00000004478,ENSG00000111276,ENSG00000067798,ENSG00000165480…
GO:BP	protein dephosphorylation	GO:0006470	0.000435643	3.36087	334	5127	138	18123	ENSG00000160075,ENSG00000171735,ENSG00000198793,ENSG00000117602,ENSG00000060656,ENSG00000116675,ENSG00000122484,ENSG00000122477,ENSG00000143079,ENSG00000155367,ENSG00000177628,ENSG00000081721,ENSG00000143155,ENSG00000143507,ENSG00000134318,ENSG00000119782,ENSG00000138032,ENSG00000221823,ENSG00000158050,ENSG00000088179,ENSG00000152127,ENSG00000150722,ENSG00000162999,ENSG00000196950,ENSG00000054356…
GO:BP	positive regulation of ion transmembrane transport	GO:0034767	0.000476127	3.32228	190	5127	87	18123	ENSG00000078369,ENSG00000158286,ENSG00000175206,ENSG00000162494,ENSG00000133216,ENSG00000090020,ENSG00000181754,ENSG00000174827,ENSG00000162728,ENSG00000143318,ENSG00000198929,ENSG00000143184,ENSG00000143153,ENSG00000143761,ENSG00000077522,ENSG00000198626,ENSG00000013016,ENSG00000162989,ENSG00000198648,ENSG00000144681,ENSG00000213533,ENSG00000069849,ENSG00000197584,ENSG00000197386,ENSG00000109689…
GO:BP	regulation of nervous system process	GO:0031644	0.000497989	3.30278	147	5127	71	18123	ENSG00000107404,ENSG00000067606,ENSG00000198793,ENSG00000090020,ENSG00000116329,ENSG00000116544,ENSG00000177628,ENSG00000117152,ENSG00000134318,ENSG00000179915,ENSG00000172071,ENSG00000115840,ENSG00000187094,ENSG00000169760,ENSG00000114279,ENSG00000184160,ENSG00000171368,ENSG00000152413,ENSG00000132911,ENSG00000146072,ENSG00000079841,ENSG00000112367,ENSG00000152822,ENSG00000106089,ENSG00000106236…
GO:BP	export from cell	GO:0140352	0.000504968	3.29674	1413	5127	484	18123	ENSG00000107404,ENSG00000069424,ENSG00000175206,ENSG00000132881,ENSG00000159363,ENSG00000162545,ENSG00000179163,ENSG00000090020,ENSG00000116885,ENSG00000131236,ENSG00000117016,ENSG00000169213,ENSG00000177301,ENSG00000171385,ENSG00000134207,ENSG00000163399,ENSG00000174827,ENSG00000159164,ENSG00000136631,ENSG00000143369,ENSG00000143457,ENSG00000160714,ENSG00000160716,ENSG00000132718,ENSG00000143195…
GO:BP	regulation of cellular component biogenesis	GO:0044087	0.000532647	3.27356	991	5127	352	18123	ENSG00000067606,ENSG00000131697,ENSG00000171603,ENSG00000198793,ENSG00000159363,ENSG00000076864,ENSG00000162552,ENSG00000133216,ENSG00000117632,ENSG00000090020,ENSG00000116329,ENSG00000174574,ENSG00000123473,ENSG00000269113,ENSG00000162409,ENSG00000117114,ENSG00000122417,ENSG00000143013,ENSG00000137942,ENSG00000117598,ENSG00000116299,ENSG00000181754,ENSG00000265808,ENSG00000171943,ENSG00000178104…
GO:BP	regulation of microtubule cytoskeleton organization	GO:0070507	0.000558169	3.25323	150	5127	72	18123	ENSG00000117632,ENSG00000162409,ENSG00000178104,ENSG00000143363,ENSG00000118200,ENSG00000154429,ENSG00000084764,ENSG00000138100,ENSG00000021574,ENSG00000204843,ENSG00000074054,ENSG00000078018,ENSG00000204104,ENSG00000163539,ENSG00000044524,ENSG00000082701,ENSG00000013810,ENSG00000063978,ENSG00000145335,ENSG00000164114,ENSG00000171368,ENSG00000131711,ENSG00000184349,ENSG00000134982,ENSG00000152503…
GO:BP	localization within membrane	GO:0051668	0.000586563	3.23169	775	5127	283	18123	ENSG00000107404,ENSG00000067606,ENSG00000116237,ENSG00000171603,ENSG00000142655,ENSG00000133216,ENSG00000204160,ENSG00000175793,ENSG00000121905,ENSG00000085832,ENSG00000169213,ENSG00000058804,ENSG00000116209,ENSG00000203965,ENSG00000174827,ENSG00000131779,ENSG00000143457,ENSG00000143376,ENSG00000143153,ENSG00000117475,ENSG00000135823,ENSG00000213047,ENSG00000058668,ENSG00000162896,ENSG00000143740…
GO:BP	metal ion transport	GO:0030001	0.000600964	3.22115	523	5127	201	18123	ENSG00000175206,ENSG00000090020,ENSG00000116329,ENSG00000159023,ENSG00000121905,ENSG00000177301,ENSG00000171385,ENSG00000163399,ENSG00000160716,ENSG00000143318,ENSG00000198929,ENSG00000117152,ENSG00000143184,ENSG00000143153,ENSG00000198216,ENSG00000058668,ENSG00000143801,ENSG00000198626,ENSG00000119782,ENSG00000115194,ENSG00000013016,ENSG00000183023,ENSG00000171132,ENSG00000158158,ENSG00000152128…
GO:BP	sodium ion transmembrane transport	GO:0035725	0.000809713	3.09167	170	5127	79	18123	ENSG00000090020,ENSG00000197106,ENSG00000163399,ENSG00000143630,ENSG00000143153,ENSG00000058668,ENSG00000143761,ENSG00000135750,ENSG00000183023,ENSG00000171132,ENSG00000158158,ENSG00000115616,ENSG00000144136,ENSG00000144290,ENSG00000153253,ENSG00000136531,ENSG00000144285,ENSG00000169432,ENSG00000136546,ENSG00000198648,ENSG00000157103,ENSG00000152642,ENSG00000183873,ENSG00000163817,ENSG00000163681…
GO:BP	regulation of microtubule-based process	GO:0032886	0.000822793	3.08471	245	5127	106	18123	ENSG00000117632,ENSG00000123473,ENSG00000162409,ENSG00000178104,ENSG00000143363,ENSG00000118200,ENSG00000154429,ENSG00000212916,ENSG00000134318,ENSG00000084764,ENSG00000138100,ENSG00000162959,ENSG00000021574,ENSG00000204843,ENSG00000115561,ENSG00000074054,ENSG00000222014,ENSG00000123607,ENSG00000078018,ENSG00000204104,ENSG00000163539,ENSG00000044524,ENSG00000082701,ENSG00000013810,ENSG00000063978…
GO:BP	system development	GO:0048731	0.000846059	3.0726	5095	5127	1578	18123	ENSG00000186891,ENSG00000107404,ENSG00000078369,ENSG00000067606,ENSG00000157933,ENSG00000197921,ENSG00000196581,ENSG00000131697,ENSG00000116254,ENSG00000158286,ENSG00000171603,ENSG00000198793,ENSG00000171819,ENSG00000204624,ENSG00000162490,ENSG00000177000,ENSG00000175206,ENSG00000120937,ENSG00000189337,ENSG00000158747,ENSG00000090432,ENSG00000076864,ENSG00000162552,ENSG00000070886,ENSG00000133216…
GO:BP	positive regulation of ion transmembrane transporter activity	GO:0032414	0.000876206	3.05739	112	5127	57	18123	ENSG00000158286,ENSG00000175206,ENSG00000162494,ENSG00000133216,ENSG00000090020,ENSG00000181754,ENSG00000174827,ENSG00000143318,ENSG00000198929,ENSG00000143153,ENSG00000077522,ENSG00000198626,ENSG00000013016,ENSG00000198648,ENSG00000144681,ENSG00000213533,ENSG00000069849,ENSG00000197386,ENSG00000109689,ENSG00000145362,ENSG00000173221,ENSG00000118507,ENSG00000153956,ENSG00000189056,ENSG00000198420…
GO:BP	response to nitrogen compound	GO:1901698	0.000959286	3.01805	1178	5127	409	18123	ENSG00000078369,ENSG00000067606,ENSG00000130939,ENSG00000198793,ENSG00000116661,ENSG00000132879,ENSG00000177000,ENSG00000175206,ENSG00000197312,ENSG00000090432,ENSG00000004487,ENSG00000179546,ENSG00000090020,ENSG00000142784,ENSG00000130766,ENSG00000121769,ENSG00000121905,ENSG00000126067,ENSG00000116954,ENSG00000070785,ENSG00000117461,ENSG00000162374,ENSG00000177606,ENSG00000142875,ENSG00000181754…
GO:BP	regulation of cellular protein localization	GO:1903827	0.0010395	2.98318	563	5127	213	18123	ENSG00000107404,ENSG00000067606,ENSG00000069424,ENSG00000159363,ENSG00000133216,ENSG00000004487,ENSG00000175793,ENSG00000130766,ENSG00000159023,ENSG00000121905,ENSG00000178028,ENSG00000116209,ENSG00000162409,ENSG00000203965,ENSG00000174827,ENSG00000143450,ENSG00000132718,ENSG00000163468,ENSG00000152332,ENSG00000198821,ENSG00000120341,ENSG00000135823,ENSG00000058668,ENSG00000119283,ENSG00000077522…
GO:BP	axon extension	GO:0048675	0.00111271	2.95362	123	5127	61	18123	ENSG00000107404,ENSG00000162490,ENSG00000143434,ENSG00000196189,ENSG00000115310,ENSG00000119866,ENSG00000135622,ENSG00000114999,ENSG00000078018,ENSG00000163539,ENSG00000144674,ENSG00000247596,ENSG00000170017,ENSG00000082701,ENSG00000082684,ENSG00000145147,ENSG00000131711,ENSG00000184347,ENSG00000113758,ENSG00000137261,ENSG00000096384,ENSG00000136279,ENSG00000106683,ENSG00000075223,ENSG00000170381…
GO:BP	regulation of signaling receptor activity	GO:0010469	0.00127924	2.89305	188	5127	85	18123	ENSG00000133216,ENSG00000116544,ENSG00000143786,ENSG00000077522,ENSG00000180875,ENSG00000171150,ENSG00000179915,ENSG00000274286,ENSG00000071051,ENSG00000187123,ENSG00000163932,ENSG00000183662,ENSG00000114423,ENSG00000169760,ENSG00000159733,ENSG00000163956,ENSG00000184160,ENSG00000109819,ENSG00000155011,ENSG00000109670,ENSG00000120251,ENSG00000145708,ENSG00000152413,ENSG00000081189,ENSG00000070808…
GO:BP	catecholamine transport	GO:0051937	0.00133743	2.87373	73	5127	41	18123	ENSG00000169213,ENSG00000177301,ENSG00000134207,ENSG00000160716,ENSG00000132718,ENSG00000143858,ENSG00000274286,ENSG00000164082,ENSG00000010322,ENSG00000184160,ENSG00000145335,ENSG00000184845,ENSG00000047579,ENSG00000135312,ENSG00000118432,ENSG00000185345,ENSG00000106089,ENSG00000082556,ENSG00000160932,ENSG00000136827,ENSG00000204176,ENSG00000173267,ENSG00000150594,ENSG00000019505,ENSG00000011347…
GO:BP	regulation of phosphatase activity	GO:0010921	0.00137427	2.86193	180	5127	82	18123	ENSG00000198793,ENSG00000117602,ENSG00000143155,ENSG00000162852,ENSG00000134318,ENSG00000119782,ENSG00000221823,ENSG00000124383,ENSG00000152127,ENSG00000178662,ENSG00000150722,ENSG00000196950,ENSG00000082701,ENSG00000013293,ENSG00000197386,ENSG00000074211,ENSG00000168743,ENSG00000081189,ENSG00000156463,ENSG00000156475,ENSG00000155846,ENSG00000112137,ENSG00000112293,ENSG00000204569,ENSG00000112640…
GO:BP	positive regulation of cation channel activity	GO:2001259	0.00143155	2.84419	78	5127	43	18123	ENSG00000158286,ENSG00000175206,ENSG00000162494,ENSG00000133216,ENSG00000181754,ENSG00000143318,ENSG00000198929,ENSG00000077522,ENSG00000013016,ENSG00000144681,ENSG00000213533,ENSG00000197386,ENSG00000109689,ENSG00000145362,ENSG00000118507,ENSG00000153956,ENSG00000189056,ENSG00000164885,ENSG00000198576,ENSG00000165995,ENSG00000120049,ENSG00000167323,ENSG00000187486,ENSG00000006071,ENSG00000129159…
GO:BP	cell surface receptor signaling pathway involved in cell-cell signaling	GO:1905114	0.00144988	2.83867	639	5127	237	18123	ENSG00000107404,ENSG00000078369,ENSG00000067606,ENSG00000157933,ENSG00000131697,ENSG00000162490,ENSG00000162552,ENSG00000060656,ENSG00000126067,ENSG00000269113,ENSG00000162409,ENSG00000143126,ENSG00000134245,ENSG00000116128,ENSG00000160716,ENSG00000117152,ENSG00000134371,ENSG00000116857,ENSG00000117153,ENSG00000116141,ENSG00000143816,ENSG00000115884,ENSG00000138032,ENSG00000179915,ENSG00000221823…
GO:BP	dopamine receptor signaling pathway	GO:0007212	0.00157216	2.8035	41	5127	27	18123	ENSG00000078369,ENSG00000117152,ENSG00000135824,ENSG00000171094,ENSG00000082701,ENSG00000173175,ENSG00000168824,ENSG00000170091,ENSG00000184845,ENSG00000047579,ENSG00000106688,ENSG00000130643,ENSG00000149295,ENSG00000188906,ENSG00000100462,ENSG00000186469,ENSG00000069966,ENSG00000128989,ENSG00000069329,ENSG00000087258,ENSG00000108370,ENSG00000141404,ENSG00000099864,ENSG00000129911,ENSG00000088256…
GO:BP	secretion by cell	GO:0032940	0.001649	2.78278	1351	5127	461	18123	ENSG00000107404,ENSG00000069424,ENSG00000175206,ENSG00000132881,ENSG00000159363,ENSG00000162545,ENSG00000179163,ENSG00000131236,ENSG00000117016,ENSG00000169213,ENSG00000177301,ENSG00000134207,ENSG00000159164,ENSG00000136631,ENSG00000143369,ENSG00000143457,ENSG00000160714,ENSG00000160716,ENSG00000132718,ENSG00000143195,ENSG00000116260,ENSG00000198216,ENSG00000143858,ENSG00000117139,ENSG00000159348…
GO:BP	regulation of dephosphorylation	GO:0035303	0.00173513	2.76067	217	5127	95	18123	ENSG00000171735,ENSG00000198793,ENSG00000117602,ENSG00000177628,ENSG00000143155,ENSG00000162852,ENSG00000134318,ENSG00000119782,ENSG00000221823,ENSG00000124383,ENSG00000152127,ENSG00000178662,ENSG00000150722,ENSG00000196950,ENSG00000163932,ENSG00000082701,ENSG00000013293,ENSG00000197386,ENSG00000074211,ENSG00000168743,ENSG00000081189,ENSG00000156463,ENSG00000156475,ENSG00000155846,ENSG00000112137…
GO:BP	Golgi vesicle transport	GO:0048193	0.00174227	2.75888	415	5127	163	18123	ENSG00000142945,ENSG00000085832,ENSG00000116675,ENSG00000134262,ENSG00000265808,ENSG00000143457,ENSG00000122218,ENSG00000117475,ENSG00000075945,ENSG00000120341,ENSG00000135823,ENSG00000183155,ENSG00000117153,ENSG00000174567,ENSG00000196352,ENSG00000154305,ENSG00000143786,ENSG00000182827,ENSG00000143761,ENSG00000116903,ENSG00000162852,ENSG00000151779,ENSG00000084731,ENSG00000115216,ENSG00000013016…
GO:BP	presynaptic endocytosis	GO:0140238	0.00179909	2.74495	64	5127	37	18123	ENSG00000116675,ENSG00000132718,ENSG00000117533,ENSG00000197959,ENSG00000143858,ENSG00000169760,ENSG00000161203,ENSG00000145214,ENSG00000145335,ENSG00000074317,ENSG00000124507,ENSG00000183826,ENSG00000065609,ENSG00000078053,ENSG00000106089,ENSG00000164885,ENSG00000107295,ENSG00000119522,ENSG00000106976,ENSG00000136827,ENSG00000107758,ENSG00000173267,ENSG00000087470,ENSG00000188906,ENSG00000067715…
GO:BP	synaptic vesicle endocytosis	GO:0048488	0.00179909	2.74495	64	5127	37	18123	ENSG00000116675,ENSG00000132718,ENSG00000117533,ENSG00000197959,ENSG00000143858,ENSG00000169760,ENSG00000161203,ENSG00000145214,ENSG00000145335,ENSG00000074317,ENSG00000124507,ENSG00000183826,ENSG00000065609,ENSG00000078053,ENSG00000106089,ENSG00000164885,ENSG00000107295,ENSG00000119522,ENSG00000106976,ENSG00000136827,ENSG00000107758,ENSG00000173267,ENSG00000087470,ENSG00000188906,ENSG00000067715…
GO:BP	positive regulation of cell development	GO:0010720	0.00182514	2.7387	306	5127	126	18123	ENSG00000198793,ENSG00000133216,ENSG00000004487,ENSG00000117400,ENSG00000157193,ENSG00000181754,ENSG00000134259,ENSG00000143320,ENSG00000122180,ENSG00000076356,ENSG00000176887,ENSG00000115738,ENSG00000119866,ENSG00000115718,ENSG00000079246,ENSG00000124006,ENSG00000116106,ENSG00000115694,ENSG00000144674,ENSG00000168036,ENSG00000182606,ENSG00000008324,ENSG00000114646,ENSG00000247596,ENSG00000163380…
GO:BP	protein localization to cell junction	GO:1902414	0.001838	2.73566	96	5127	50	18123	ENSG00000107404,ENSG00000067606,ENSG00000171603,ENSG00000162434,ENSG00000143740,ENSG00000179915,ENSG00000168280,ENSG00000082126,ENSG00000144596,ENSG00000164061,ENSG00000169760,ENSG00000168993,ENSG00000168824,ENSG00000131437,ENSG00000050748,ENSG00000186472,ENSG00000008277,ENSG00000189056,ENSG00000164885,ENSG00000104219,ENSG00000150054,ENSG00000108231,ENSG00000110076,ENSG00000150672,ENSG00000139182…
GO:BP	cellular response to dopamine	GO:1903351	0.00187859	2.72617	86	5127	46	18123	ENSG00000078369,ENSG00000179546,ENSG00000143630,ENSG00000117152,ENSG00000135824,ENSG00000171094,ENSG00000179097,ENSG00000082701,ENSG00000173175,ENSG00000168824,ENSG00000170091,ENSG00000184845,ENSG00000113749,ENSG00000047579,ENSG00000135312,ENSG00000168830,ENSG00000196591,ENSG00000185345,ENSG00000181072,ENSG00000157219,ENSG00000106688,ENSG00000148680,ENSG00000130643,ENSG00000180720,ENSG00000168539…
GO:BP	transport along microtubule	GO:0010970	0.00190882	2.71923	162	5127	75	18123	ENSG00000067606,ENSG00000188807,ENSG00000142655,ENSG00000117245,ENSG00000186094,ENSG00000117155,ENSG00000075945,ENSG00000084731,ENSG00000021574,ENSG00000138036,ENSG00000138095,ENSG00000168280,ENSG00000123607,ENSG00000078018,ENSG00000118242,ENSG00000204104,ENSG00000130294,ENSG00000182606,ENSG00000114446,ENSG00000181789,ENSG00000163913,ENSG00000198836,ENSG00000197386,ENSG00000154277,ENSG00000181004…
GO:BP	regulation of establishment of protein localization	GO:0070201	0.00198875	2.70142	595	5127	222	18123	ENSG00000067606,ENSG00000159363,ENSG00000162545,ENSG00000175793,ENSG00000121905,ENSG00000178028,ENSG00000203965,ENSG00000174827,ENSG00000143457,ENSG00000143450,ENSG00000163468,ENSG00000152332,ENSG00000120341,ENSG00000198216,ENSG00000143761,ENSG00000162852,ENSG00000119185,ENSG00000163032,ENSG00000170745,ENSG00000119782,ENSG00000115137,ENSG00000162878,ENSG00000171132,ENSG00000068912,ENSG00000221823…
GO:BP	cellular response to metal ion	GO:0071248	0.00201806	2.69507	198	5127	88	18123	ENSG00000159363,ENSG00000121905,ENSG00000162409,ENSG00000177606,ENSG00000085491,ENSG00000134207,ENSG00000132718,ENSG00000116161,ENSG00000143858,ENSG00000122180,ENSG00000143473,ENSG00000171303,ENSG00000179915,ENSG00000172071,ENSG00000118260,ENSG00000144550,ENSG00000114026,ENSG00000183873,ENSG00000114346,ENSG00000169760,ENSG00000163347,ENSG00000109819,ENSG00000145335,ENSG00000109332,ENSG00000145349…
GO:BP	neuron recognition	GO:0008038	0.00202164	2.6943	48	5127	30	18123	ENSG00000133216,ENSG00000162614,ENSG00000181754,ENSG00000085552,ENSG00000115310,ENSG00000116106,ENSG00000134115,ENSG00000144619,ENSG00000185008,ENSG00000169855,ENSG00000044524,ENSG00000172020,ENSG00000182580,ENSG00000146072,ENSG00000118432,ENSG00000075213,ENSG00000091129,ENSG00000174469,ENSG00000164924,ENSG00000182197,ENSG00000183715,ENSG00000182636,ENSG00000156642,ENSG00000108947,ENSG00000176749…
GO:BP	regulation of cellular localization	GO:0060341	0.00207566	2.68284	851	5127	304	18123	ENSG00000107404,ENSG00000067606,ENSG00000069424,ENSG00000175206,ENSG00000159363,ENSG00000162545,ENSG00000133216,ENSG00000004487,ENSG00000175793,ENSG00000130766,ENSG00000159023,ENSG00000121905,ENSG00000178028,ENSG00000116209,ENSG00000162409,ENSG00000203965,ENSG00000174827,ENSG00000143450,ENSG00000132718,ENSG00000163468,ENSG00000143318,ENSG00000152332,ENSG00000198821,ENSG00000143184,ENSG00000120341…
GO:BP	central nervous system neuron axonogenesis	GO:0021955	0.0021783	2.66188	35	5127	24	18123	ENSG00000162490,ENSG00000133216,ENSG00000160716,ENSG00000153234,ENSG00000116106,ENSG00000154928,ENSG00000182580,ENSG00000174013,ENSG00000145147,ENSG00000096384,ENSG00000221866,ENSG00000133083,ENSG00000005810,ENSG00000100503,ENSG00000080824,ENSG00000007168,ENSG00000166579,ENSG00000118276,ENSG00000187323,ENSG00000160460,ENSG00000160007,ENSG00000158470,ENSG00000197381,ENSG00000077279
GO:BP	axonal transport	GO:0098930	0.00219273	2.65901	62	5127	36	18123	ENSG00000186094,ENSG00000021574,ENSG00000168280,ENSG00000078018,ENSG00000130294,ENSG00000182606,ENSG00000198836,ENSG00000154277,ENSG00000137463,ENSG00000177879,ENSG00000131437,ENSG00000072803,ENSG00000047579,ENSG00000277586,ENSG00000070718,ENSG00000147642,ENSG00000135049,ENSG00000185009,ENSG00000130643,ENSG00000174871,ENSG00000150672,ENSG00000165714,ENSG00000155980,ENSG00000166963,ENSG00000103723…
GO:BP	phosphorylation	GO:0016310	0.00222231	2.6532	1996	5127	657	18123	ENSG00000186891,ENSG00000107404,ENSG00000067606,ENSG00000157881,ENSG00000197921,ENSG00000162408,ENSG00000198793,ENSG00000175206,ENSG00000159363,ENSG00000162545,ENSG00000090432,ENSG00000070886,ENSG00000133216,ENSG00000175087,ENSG00000175793,ENSG00000130766,ENSG00000116329,ENSG00000183317,ENSG00000086015,ENSG00000117461,ENSG00000157193,ENSG00000058804,ENSG00000162409,ENSG00000173406,ENSG00000162434…
GO:BP	positive regulation of dendrite extension	GO:1903861	0.00235021	2.62889	23	5127	18	18123	ENSG00000090432,ENSG00000143858,ENSG00000144550,ENSG00000124772,ENSG00000079841,ENSG00000185345,ENSG00000198742,ENSG00000176406,ENSG00000137055,ENSG00000067715,ENSG00000100884,ENSG00000141576,ENSG00000132872,ENSG00000049759,ENSG00000130477,ENSG00000213023,ENSG00000105605,ENSG00000089057
GO:BP	negative regulation of phosphorus metabolic process	GO:0010563	0.00235781	2.62749	544	5127	205	18123	ENSG00000107404,ENSG00000067606,ENSG00000198793,ENSG00000175206,ENSG00000162545,ENSG00000133216,ENSG00000175793,ENSG00000121905,ENSG00000197852,ENSG00000177628,ENSG00000117152,ENSG00000143155,ENSG00000116741,ENSG00000122180,ENSG00000143507,ENSG00000186063,ENSG00000185420,ENSG00000162852,ENSG00000175137,ENSG00000119185,ENSG00000134318,ENSG00000119782,ENSG00000084734,ENSG00000183023,ENSG00000171150…
GO:BP	protein localization to plasma membrane	GO:0072659	0.00241239	2.61755	287	5127	119	18123	ENSG00000067606,ENSG00000133216,ENSG00000169213,ENSG00000116209,ENSG00000174827,ENSG00000143457,ENSG00000143153,ENSG00000117475,ENSG00000058668,ENSG00000077522,ENSG00000162852,ENSG00000119185,ENSG00000134318,ENSG00000084710,ENSG00000013016,ENSG00000162878,ENSG00000138078,ENSG00000171132,ENSG00000179915,ENSG00000115041,ENSG00000175497,ENSG00000115806,ENSG00000155744,ENSG00000123983,ENSG00000153823…
GO:BP	calcium ion transport	GO:0006816	0.00244921	2.61097	441	5127	171	18123	ENSG00000175206,ENSG00000090020,ENSG00000116329,ENSG00000159023,ENSG00000121905,ENSG00000160716,ENSG00000143318,ENSG00000198929,ENSG00000117152,ENSG00000143184,ENSG00000143153,ENSG00000198216,ENSG00000058668,ENSG00000143801,ENSG00000198626,ENSG00000119782,ENSG00000013016,ENSG00000183023,ENSG00000171132,ENSG00000182389,ENSG00000115840,ENSG00000150995,ENSG00000157087,ENSG00000144681,ENSG00000168036…
GO:BP	response to dopamine	GO:1903350	0.00289793	2.53791	87	5127	46	18123	ENSG00000078369,ENSG00000179546,ENSG00000143630,ENSG00000117152,ENSG00000135824,ENSG00000171094,ENSG00000179097,ENSG00000082701,ENSG00000173175,ENSG00000168824,ENSG00000170091,ENSG00000184845,ENSG00000113749,ENSG00000047579,ENSG00000135312,ENSG00000168830,ENSG00000196591,ENSG00000185345,ENSG00000181072,ENSG00000157219,ENSG00000106688,ENSG00000148680,ENSG00000130643,ENSG00000180720,ENSG00000168539…
GO:BP	regulation of cellular process	GO:0050794	0.00292639	2.53367	11517	5127	3396	18123	ENSG00000188976,ENSG00000186891,ENSG00000107404,ENSG00000160075,ENSG00000078369,ENSG00000187730,ENSG00000067606,ENSG00000157933,ENSG00000197921,ENSG00000158109,ENSG00000196581,ENSG00000131697,ENSG00000069424,ENSG00000116254,ENSG00000158286,ENSG00000116237,ENSG00000158292,ENSG00000215788,ENSG00000171680,ENSG00000171735,ENSG00000171603,ENSG00000130939,ENSG00000175279,ENSG00000241563,ENSG00000142655…
174206	ENSG00000111490	ENSG00000156076	ENSG00000155974	ENSG00000127337	ENSG00000166268	ENSG00000135643	ENSG00000153233	ENSG00000072657	ENSG00000166006	ENSG00000091039	ENSG00000067798	ENSG00000067715	ENSG00000139220	ENSG00000133636	ENSG00000049130	ENSG00000070961	ENSG00000173598	ENSG00000111145	ENSG00000059758	ENSG00000120868	ENSG00000185046	ENSG00000185480	ENSG00000017427	ENSG00000166598	ENSG00000198431	ENSG00000074590	ENSG00000111785	ENSG00000151136	ENSG00000110851	ENSG00000075856	ENSG00000110880	ENSG00000139436	ENSG00000174437	ENSG00000196510	ENSG00000196850	ENSG00000111249	ENSG00000089234	ENSG00000135144	ENSG00000123064	ENSG00000139405	ENSG00000111412	ENSG00000135119	ENSG00000135116	ENSG00000174989	ENSG00000088992	ENSG00000089250	ENSG00000171435	ENSG00000111445	ENSG00000176871
GO:BP	negative regulation of phosphate metabolic process	GO:0045936	0.00319962	2.4949	543	5127	204	18123	ENSG00000107404,ENSG00000067606,ENSG00000198793,ENSG00000175206,ENSG00000162545,ENSG00000133216,ENSG00000175793,ENSG00000121905,ENSG00000197852,ENSG00000177628,ENSG00000117152,ENSG00000143155,ENSG00000116741,ENSG00000122180,ENSG00000143507,ENSG00000186063,ENSG00000185420,ENSG00000162852,ENSG00000175137,ENSG00000119185,ENSG00000134318,ENSG00000119782,ENSG00000084734,ENSG00000183023,ENSG00000171150…
GO:BP	positive regulation of transporter activity	GO:0032411	0.00349542	2.4565	121	5127	59	18123	ENSG00000158286,ENSG00000175206,ENSG00000162494,ENSG00000133216,ENSG00000090020,ENSG00000181754,ENSG00000174827,ENSG00000143318,ENSG00000198929,ENSG00000143153,ENSG00000077522,ENSG00000198626,ENSG00000013016,ENSG00000198648,ENSG00000144681,ENSG00000213533,ENSG00000163932,ENSG00000069849,ENSG00000197386,ENSG00000109689,ENSG00000145362,ENSG00000173221,ENSG00000118507,ENSG00000153956,ENSG00000189056…
GO:BP	positive regulation of establishment of protein localization	GO:1904951	0.00383297	2.41646	345	5127	138	18123	ENSG00000067606,ENSG00000159363,ENSG00000162545,ENSG00000175793,ENSG00000121905,ENSG00000178028,ENSG00000203965,ENSG00000174827,ENSG00000143457,ENSG00000143450,ENSG00000163468,ENSG00000120341,ENSG00000143761,ENSG00000162852,ENSG00000119185,ENSG00000163032,ENSG00000171132,ENSG00000221823,ENSG00000115317,ENSG00000123983,ENSG00000134109,ENSG00000170011,ENSG00000163930,ENSG00000163932,ENSG00000170837…
GO:BP	cellular response to inorganic substance	GO:0071241	0.00393073	2.40553	226	5127	97	18123	ENSG00000197312,ENSG00000159363,ENSG00000121905,ENSG00000162409,ENSG00000177606,ENSG00000085491,ENSG00000134207,ENSG00000132718,ENSG00000116161,ENSG00000143858,ENSG00000122180,ENSG00000143473,ENSG00000171303,ENSG00000179915,ENSG00000172071,ENSG00000118260,ENSG00000144550,ENSG00000114026,ENSG00000183873,ENSG00000114346,ENSG00000169760,ENSG00000163347,ENSG00000109819,ENSG00000138668,ENSG00000145335…
GO:BP	protein polymerization	GO:0051258	0.00404065	2.39355	307	5127	125	18123	ENSG00000198793,ENSG00000117632,ENSG00000178104,ENSG00000143363,ENSG00000143318,ENSG00000197959,ENSG00000118200,ENSG00000143761,ENSG00000197872,ENSG00000084764,ENSG00000163171,ENSG00000171132,ENSG00000075340,ENSG00000204843,ENSG00000066032,ENSG00000034510,ENSG00000115561,ENSG00000071051,ENSG00000115091,ENSG00000074054,ENSG00000061676,ENSG00000138443,ENSG00000078018,ENSG00000163539,ENSG00000136059…
GO:BP	regulation of cell growth	GO:0001558	0.00408125	2.38921	426	5127	165	18123	ENSG00000171603,ENSG00000198793,ENSG00000162490,ENSG00000175206,ENSG00000120937,ENSG00000090432,ENSG00000175793,ENSG00000090020,ENSG00000130766,ENSG00000117425,ENSG00000134259,ENSG00000143434,ENSG00000196189,ENSG00000143320,ENSG00000132694,ENSG00000117152,ENSG00000116741,ENSG00000134371,ENSG00000143858,ENSG00000168243,ENSG00000115310,ENSG00000119866,ENSG00000135622,ENSG00000114999,ENSG00000078018…
GO:BP	vesicle-mediated transport	GO:0016192	0.00516136	2.28724	2193	5127	713	18123	ENSG00000107404,ENSG00000069424,ENSG00000171603,ENSG00000175206,ENSG00000132881,ENSG00000159363,ENSG00000117245,ENSG00000179163,ENSG00000121905,ENSG00000131236,ENSG00000117016,ENSG00000142945,ENSG00000085832,ENSG00000169213,ENSG00000157077,ENSG00000157193,ENSG00000134709,ENSG00000116675,ENSG00000118473,ENSG00000137942,ENSG00000134215,ENSG00000134262,ENSG00000134207,ENSG00000265808,ENSG00000159164…
GO:BP	long-term memory	GO:0007616	0.00533747	2.27266	34	5127	23	18123	ENSG00000067606,ENSG00000198793,ENSG00000198961,ENSG00000152495,ENSG00000155511,ENSG00000169220,ENSG00000204371,ENSG00000183826,ENSG00000164742,ENSG00000006128,ENSG00000189056,ENSG00000104327,ENSG00000198576,ENSG00000107864,ENSG00000174576,ENSG00000149295,ENSG00000118971,ENSG00000128829,ENSG00000058335,ENSG00000161681,ENSG00000171867,ENSG00000125872,ENSG00000165186
GO:BP	visual learning	GO:0008542	0.00535401	2.27132	45	5127	28	18123	ENSG00000198793,ENSG00000160716,ENSG00000118260,ENSG00000187094,ENSG00000157404,ENSG00000113161,ENSG00000184845,ENSG00000169220,ENSG00000197283,ENSG00000157764,ENSG00000164885,ENSG00000085788,ENSG00000123454,ENSG00000176884,ENSG00000177963,ENSG00000006071,ENSG00000149295,ENSG00000172425,ENSG00000133703,ENSG00000198673,ENSG00000134138,ENSG00000156642,ENSG00000183454,ENSG00000103034,ENSG00000196712…
GO:BP	cellular response to calcium ion	GO:0071277	0.00549644	2.25992	86	5127	45	18123	ENSG00000121905,ENSG00000162409,ENSG00000085491,ENSG00000134207,ENSG00000132718,ENSG00000116161,ENSG00000143858,ENSG00000143473,ENSG00000179915,ENSG00000144550,ENSG00000183873,ENSG00000114346,ENSG00000169760,ENSG00000145349,ENSG00000145708,ENSG00000081189,ENSG00000112293,ENSG00000124772,ENSG00000048545,ENSG00000164742,ENSG00000170667,ENSG00000157764,ENSG00000158856,ENSG00000044574,ENSG00000204176…
GO:BP	response to calcium ion	GO:0051592	0.00556554	2.25449	152	5127	70	18123	ENSG00000121905,ENSG00000162409,ENSG00000085491,ENSG00000134207,ENSG00000132718,ENSG00000116161,ENSG00000143858,ENSG00000143473,ENSG00000198626,ENSG00000115884,ENSG00000179915,ENSG00000115840,ENSG00000144550,ENSG00000157103,ENSG00000183873,ENSG00000114346,ENSG00000169760,ENSG00000197584,ENSG00000138668,ENSG00000138674,ENSG00000138814,ENSG00000145349,ENSG00000138741,ENSG00000145708,ENSG00000152413…
GO:BP	regulation of cell junction assembly	GO:1901888	0.00612835	2.21266	208	5127	90	18123	ENSG00000131697,ENSG00000171603,ENSG00000162552,ENSG00000133216,ENSG00000090020,ENSG00000117114,ENSG00000181754,ENSG00000160716,ENSG00000196189,ENSG00000198400,ENSG00000119185,ENSG00000134318,ENSG00000179915,ENSG00000143951,ENSG00000162951,ENSG00000074054,ENSG00000175928,ENSG00000156959,ENSG00000163539,ENSG00000185008,ENSG00000044524,ENSG00000154928,ENSG00000158258,ENSG00000121871,ENSG00000169760…
GO:BP	cellular response to nitrogen compound	GO:1901699	0.00622085	2.20615	728	5127	262	18123	ENSG00000078369,ENSG00000067606,ENSG00000198793,ENSG00000197312,ENSG00000090432,ENSG00000004487,ENSG00000179546,ENSG00000090020,ENSG00000142784,ENSG00000130766,ENSG00000116954,ENSG00000117461,ENSG00000142875,ENSG00000181754,ENSG00000160716,ENSG00000143630,ENSG00000143627,ENSG00000158773,ENSG00000117152,ENSG00000135824,ENSG00000135829,ENSG00000058668,ENSG00000136628,ENSG00000077522,ENSG00000198626…
GO:BP	developmental maturation	GO:0021700	0.00632447	2.19898	280	5127	115	18123	ENSG00000197921,ENSG00000171603,ENSG00000198793,ENSG00000070886,ENSG00000004487,ENSG00000198492,ENSG00000116455,ENSG00000177628,ENSG00000162782,ENSG00000138083,ENSG00000179915,ENSG00000119866,ENSG00000153234,ENSG00000171450,ENSG00000054356,ENSG00000163273,ENSG00000006607,ENSG00000144671,ENSG00000168036,ENSG00000114383,ENSG00000114547,ENSG00000198836,ENSG00000090316,ENSG00000132466,ENSG00000151466…
GO:BP	regulation of microtubule polymerization	GO:0031113	0.00681162	2.16675	57	5127	33	18123	ENSG00000117632,ENSG00000178104,ENSG00000143363,ENSG00000118200,ENSG00000084764,ENSG00000204843,ENSG00000074054,ENSG00000078018,ENSG00000163539,ENSG00000145335,ENSG00000131711,ENSG00000105976,ENSG00000104435,ENSG00000070610,ENSG00000130559,ENSG00000175216,ENSG00000149269,ENSG00000004478,ENSG00000111276,ENSG00000067798,ENSG00000102606,ENSG00000100503,ENSG00000108961,ENSG00000108262,ENSG00000176749…
GO:BP	cytoskeleton-dependent intracellular transport	GO:0030705	0.00688448	2.16213	200	5127	87	18123	ENSG00000067606,ENSG00000188807,ENSG00000142655,ENSG00000117245,ENSG00000186094,ENSG00000134709,ENSG00000117155,ENSG00000137942,ENSG00000075945,ENSG00000084731,ENSG00000021574,ENSG00000138036,ENSG00000138095,ENSG00000168280,ENSG00000123607,ENSG00000078018,ENSG00000118242,ENSG00000204104,ENSG00000130294,ENSG00000182606,ENSG00000114446,ENSG00000181789,ENSG00000163913,ENSG00000198836,ENSG00000197386…
GO:BP	ionotropic glutamate receptor signaling pathway	GO:0035235	0.00693632	2.15887	26	5127	19	18123	ENSG00000163873,ENSG00000152208,ENSG00000120251,ENSG00000155511,ENSG00000164418,ENSG00000120899,ENSG00000198785,ENSG00000176884,ENSG00000152578,ENSG00000149403,ENSG00000273079,ENSG00000183454,ENSG00000176749,ENSG00000105737,ENSG00000105464,ENSG00000142192,ENSG00000171189,ENSG00000156299,ENSG00000125675
GO:BP	regulation of dendrite extension	GO:1903859	0.00693632	2.15887	26	5127	19	18123	ENSG00000090432,ENSG00000143858,ENSG00000119866,ENSG00000144550,ENSG00000124772,ENSG00000079841,ENSG00000185345,ENSG00000198742,ENSG00000176406,ENSG00000137055,ENSG00000067715,ENSG00000100884,ENSG00000141576,ENSG00000132872,ENSG00000049759,ENSG00000130477,ENSG00000213023,ENSG00000105605,ENSG00000089057
GO:BP	dopamine transport	GO:0015872	0.00693706	2.15882	50	5127	30	18123	ENSG00000169213,ENSG00000177301,ENSG00000134207,ENSG00000160716,ENSG00000132718,ENSG00000143858,ENSG00000164082,ENSG00000145335,ENSG00000184845,ENSG00000047579,ENSG00000135312,ENSG00000118432,ENSG00000185345,ENSG00000082556,ENSG00000136827,ENSG00000204176,ENSG00000173267,ENSG00000019505,ENSG00000011347,ENSG00000173227,ENSG00000149295,ENSG00000067715,ENSG00000102468,ENSG00000184984,ENSG00000183044…
GO:BP	proteasome-mediated ubiquitin-dependent protein catabolic process	GO:0043161	0.00768072	2.1146	442	5127	169	18123	ENSG00000107404,ENSG00000130939,ENSG00000116661,ENSG00000132879,ENSG00000116514,ENSG00000126067,ENSG00000126107,ENSG00000162378,ENSG00000174842,ENSG00000177628,ENSG00000160803,ENSG00000143207,ENSG00000168159,ENSG00000171150,ENSG00000068912,ENSG00000197329,ENSG00000153561,ENSG00000153107,ENSG00000036257,ENSG00000113851,ENSG00000134109,ENSG00000153558,ENSG00000168036,ENSG00000081154,ENSG00000082701…
GO:BP	regulation of cellular component size	GO:0032535	0.00813443	2.08967	388	5127	151	18123	ENSG00000198793,ENSG00000162490,ENSG00000011021,ENSG00000159363,ENSG00000004487,ENSG00000142784,ENSG00000169213,ENSG00000134215,ENSG00000134259,ENSG00000131779,ENSG00000143434,ENSG00000196189,ENSG00000143320,ENSG00000143761,ENSG00000077522,ENSG00000117020,ENSG00000197872,ENSG00000163171,ENSG00000171132,ENSG00000115310,ENSG00000119866,ENSG00000075340,ENSG00000135622,ENSG00000066032,ENSG00000034510…
GO:BP	proteasomal protein catabolic process	GO:0010498	0.00899954	2.04578	501	5127	188	18123	ENSG00000107404,ENSG00000130939,ENSG00000116661,ENSG00000132879,ENSG00000197312,ENSG00000116514,ENSG00000126067,ENSG00000126107,ENSG00000162378,ENSG00000174842,ENSG00000177628,ENSG00000160803,ENSG00000143207,ENSG00000168159,ENSG00000171150,ENSG00000068912,ENSG00000197329,ENSG00000153561,ENSG00000153107,ENSG00000036257,ENSG00000113851,ENSG00000134109,ENSG00000153558,ENSG00000168036,ENSG00000081154…
GO:BP	response to metal ion	GO:0010038	0.00965513	2.01524	377	5127	147	18123	ENSG00000159363,ENSG00000121905,ENSG00000162409,ENSG00000177606,ENSG00000085491,ENSG00000134207,ENSG00000143627,ENSG00000132718,ENSG00000116161,ENSG00000143858,ENSG00000122180,ENSG00000143473,ENSG00000198626,ENSG00000115884,ENSG00000119772,ENSG00000171303,ENSG00000138030,ENSG00000115194,ENSG00000179915,ENSG00000172071,ENSG00000115840,ENSG00000118260,ENSG00000144550,ENSG00000114026,ENSG00000157103…
GO:BP	regulation of long-term synaptic potentiation	GO:1900271	0.00999086	2.0004	46	5127	28	18123	ENSG00000133216,ENSG00000118260,ENSG00000116106,ENSG00000082701,ENSG00000196549,ENSG00000168824,ENSG00000120727,ENSG00000079689,ENSG00000164742,ENSG00000158528,ENSG00000189056,ENSG00000104219,ENSG00000104327,ENSG00000198576,ENSG00000149295,ENSG00000154146,ENSG00000179841,ENSG00000100600,ENSG00000036530,ENSG00000175344,ENSG00000128829,ENSG00000156642,ENSG00000172137,ENSG00000105662,ENSG00000171867…
GO:BP	synaptic vesicle clustering	GO:0097091	0.0105136	1.97825	15	5127	13	18123	ENSG00000179915,ENSG00000157152,ENSG00000168036,ENSG00000169760,ENSG00000186472,ENSG00000174672,ENSG00000169992,ENSG00000170558,ENSG00000105649,ENSG00000160469,ENSG00000101463,ENSG00000185666,ENSG00000008056
GO:BP	regulation of protein transport	GO:0051223	0.0106513	1.9726	570	5127	210	18123	ENSG00000067606,ENSG00000159363,ENSG00000162545,ENSG00000175793,ENSG00000121905,ENSG00000178028,ENSG00000203965,ENSG00000174827,ENSG00000143457,ENSG00000143450,ENSG00000152332,ENSG00000120341,ENSG00000198216,ENSG00000143761,ENSG00000162852,ENSG00000119185,ENSG00000163032,ENSG00000170745,ENSG00000119782,ENSG00000115137,ENSG00000162878,ENSG00000171132,ENSG00000068912,ENSG00000221823,ENSG00000135631…
GO:BP	protein localization to membrane	GO:0072657	0.0108091	1.96621	698	5127	251	18123	ENSG00000107404,ENSG00000067606,ENSG00000116237,ENSG00000171603,ENSG00000142655,ENSG00000133216,ENSG00000204160,ENSG00000175793,ENSG00000121905,ENSG00000169213,ENSG00000058804,ENSG00000116209,ENSG00000203965,ENSG00000174827,ENSG00000131779,ENSG00000143457,ENSG00000143153,ENSG00000117475,ENSG00000058668,ENSG00000162896,ENSG00000143740,ENSG00000077522,ENSG00000162852,ENSG00000119185,ENSG00000134318…
GO:BP	microtubule nucleation	GO:0007020	0.0113925	1.94338	35	5127	23	18123	ENSG00000178104,ENSG00000204843,ENSG00000074054,ENSG00000163539,ENSG00000171368,ENSG00000010017,ENSG00000167110,ENSG00000130640,ENSG00000175216,ENSG00000149269,ENSG00000151849,ENSG00000204899,ENSG00000102606,ENSG00000100503,ENSG00000275835,ENSG00000137822,ENSG00000108961,ENSG00000166579,ENSG00000108262,ENSG00000131462,ENSG00000037042,ENSG00000141551,ENSG00000088325
GO:BP	central nervous system neuron differentiation	GO:0021953	0.0121064	1.91698	191	5127	83	18123	ENSG00000197921,ENSG00000116254,ENSG00000162490,ENSG00000133216,ENSG00000186094,ENSG00000162374,ENSG00000143013,ENSG00000177551,ENSG00000160716,ENSG00000177628,ENSG00000000457,ENSG00000159388,ENSG00000179915,ENSG00000153234,ENSG00000144290,ENSG00000123607,ENSG00000119042,ENSG00000078018,ENSG00000178568,ENSG00000116106,ENSG00000168036,ENSG00000185008,ENSG00000169855,ENSG00000154928,ENSG00000182580…
GO:BP	ephrin receptor signaling pathway	GO:0048013	0.0123263	1.90917	88	5127	45	18123	ENSG00000070886,ENSG00000133216,ENSG00000183317,ENSG00000134215,ENSG00000143590,ENSG00000198400,ENSG00000143801,ENSG00000134318,ENSG00000071051,ENSG00000115091,ENSG00000128656,ENSG00000116106,ENSG00000066248,ENSG00000044524,ENSG00000080224,ENSG00000160145,ENSG00000154928,ENSG00000158092,ENSG00000161203,ENSG00000182580,ENSG00000145242,ENSG00000184349,ENSG00000135333,ENSG00000106123,ENSG00000137575…
GO:BP	positive regulation of cellular protein localization	GO:1903829	0.0126199	1.89894	307	5127	123	18123	ENSG00000133216,ENSG00000175793,ENSG00000130766,ENSG00000159023,ENSG00000121905,ENSG00000178028,ENSG00000162409,ENSG00000203965,ENSG00000174827,ENSG00000132718,ENSG00000163468,ENSG00000198821,ENSG00000058668,ENSG00000162852,ENSG00000119185,ENSG00000134318,ENSG00000171132,ENSG00000179915,ENSG00000115310,ENSG00000221823,ENSG00000115317,ENSG00000172071,ENSG00000175497,ENSG00000178568,ENSG00000123983…
GO:BP	monoamine transport	GO:0015844	0.0128663	1.89055	83	5127	43	18123	ENSG00000169213,ENSG00000177301,ENSG00000134207,ENSG00000160716,ENSG00000132718,ENSG00000143858,ENSG00000274286,ENSG00000164082,ENSG00000010322,ENSG00000184160,ENSG00000145335,ENSG00000184845,ENSG00000047579,ENSG00000135312,ENSG00000118432,ENSG00000185345,ENSG00000106089,ENSG00000082556,ENSG00000160932,ENSG00000136827,ENSG00000204176,ENSG00000173267,ENSG00000150594,ENSG00000019505,ENSG00000011347…
GO:BP	negative regulation of microtubule polymerization or depolymerization	GO:0031111	0.0141835	1.84822	42	5127	26	18123	ENSG00000117632,ENSG00000118200,ENSG00000138100,ENSG00000074054,ENSG00000078018,ENSG00000163539,ENSG00000145335,ENSG00000131711,ENSG00000134982,ENSG00000104435,ENSG00000130559,ENSG00000004478,ENSG00000067798,ENSG00000136108,ENSG00000102606,ENSG00000166780,ENSG00000140854,ENSG00000141556,ENSG00000115266,ENSG00000104833,ENSG00000076826,ENSG00000105270,ENSG00000088325,ENSG00000157540,ENSG00000185133…
GO:BP	cellular process	GO:0009987	0.0145173	1.83811	17186	5127	4920	18123	ENSG00000188976,ENSG00000186891,ENSG00000176022,ENSG00000107404,ENSG00000160075,ENSG00000189339,ENSG00000078369,ENSG00000187730,ENSG00000067606,ENSG00000157933,ENSG00000157881,ENSG00000197921,ENSG00000157870,ENSG00000158109,ENSG00000169598,ENSG00000196581,ENSG00000131697,ENSG00000069424,ENSG00000116254,ENSG00000158286,ENSG00000116237,ENSG00000158292,ENSG00000097021,ENSG00000187017,ENSG00000215788…
168546	ENSG00000130227	ENSG00000158806	ENSG00000158815	ENSG00000158856	ENSG00000275074	ENSG00000197181	ENSG00000104635	ENSG00000158941	ENSG00000147439	ENSG00000179388	ENSG00000008853	ENSG00000147457	ENSG00000197217	ENSG00000104722	ENSG00000277586	ENSG00000240694	ENSG00000092964	ENSG00000015592	ENSG00000104228	ENSG00000120899	ENSG00000120903	ENSG00000147419	ENSG00000134014	ENSG00000168081	ENSG00000104290	ENSG00000012232	ENSG00000120875	ENSG00000104687	ENSG00000104691	ENSG00000157168	ENSG00000133878	ENSG00000156687	ENSG00000104221	ENSG00000129691	ENSG00000147465	ENSG00000156735	ENSG00000085788	ENSG00000165046	ENSG00000168615	ENSG00000197140	ENSG00000165066	ENSG00000029534	ENSG00000070718	ENSG00000164808	ENSG00000104738	ENSG00000147481	ENSG00000147485	ENSG00000082556	ENSG00000047249
GO:BP	regulation of molecular function	GO:0065009	0.0154198	1.81192	3191	5127	1005	18123	ENSG00000107404,ENSG00000169885,ENSG00000067606,ENSG00000157933,ENSG00000158286,ENSG00000171680,ENSG00000142655,ENSG00000198793,ENSG00000175206,ENSG00000162494,ENSG00000159363,ENSG00000162545,ENSG00000090432,ENSG00000076864,ENSG00000162552,ENSG00000070886,ENSG00000133216,ENSG00000004487,ENSG00000125944,ENSG00000117602,ENSG00000117632,ENSG00000175793,ENSG00000090020,ENSG00000142784,ENSG00000126709…
GO:BP	positive regulation of protein transport	GO:0051222	0.0158181	1.80085	329	5127	130	18123	ENSG00000067606,ENSG00000159363,ENSG00000162545,ENSG00000175793,ENSG00000121905,ENSG00000178028,ENSG00000203965,ENSG00000174827,ENSG00000143457,ENSG00000143450,ENSG00000120341,ENSG00000143761,ENSG00000162852,ENSG00000119185,ENSG00000163032,ENSG00000171132,ENSG00000221823,ENSG00000115317,ENSG00000123983,ENSG00000134109,ENSG00000170011,ENSG00000163930,ENSG00000163932,ENSG00000170837,ENSG00000082701…
GO:BP	positive regulation of potassium ion transmembrane transporter activity	GO:1901018	0.0159054	1.79845	29	5127	20	18123	ENSG00000158286,ENSG00000175206,ENSG00000162494,ENSG00000181754,ENSG00000198929,ENSG00000143153,ENSG00000077522,ENSG00000069849,ENSG00000145362,ENSG00000118507,ENSG00000120049,ENSG00000006071,ENSG00000129159,ENSG00000183908,ENSG00000069482,ENSG00000137731,ENSG00000111262,ENSG00000166006,ENSG00000151320,ENSG00000182687
GO:BP	neuron death	GO:0070997	0.0160962	1.79328	365	5127	142	18123	ENSG00000198793,ENSG00000162490,ENSG00000159363,ENSG00000090020,ENSG00000116133,ENSG00000177606,ENSG00000134259,ENSG00000177628,ENSG00000198400,ENSG00000159388,ENSG00000095002,ENSG00000115317,ENSG00000153234,ENSG00000136531,ENSG00000144381,ENSG00000118260,ENSG00000068024,ENSG00000197548,ENSG00000151090,ENSG00000168036,ENSG00000144746,ENSG00000114480,ENSG00000091972,ENSG00000163606,ENSG00000082701…
GO:BP	negative regulation of synaptic transmission	GO:0050805	0.016552	1.78115	71	5127	38	18123	ENSG00000163873,ENSG00000132718,ENSG00000143761,ENSG00000127838,ENSG00000157103,ENSG00000152208,ENSG00000164129,ENSG00000145632,ENSG00000155511,ENSG00000204314,ENSG00000135312,ENSG00000164418,ENSG00000185345,ENSG00000215045,ENSG00000158528,ENSG00000087085,ENSG00000157680,ENSG00000157764,ENSG00000120899,ENSG00000198576,ENSG00000155886,ENSG00000136854,ENSG00000156395,ENSG00000162105,ENSG00000149295…
GO:BP	negative regulation of amine transport	GO:0051953	0.0171773	1.76504	27	5127	19	18123	ENSG00000132718,ENSG00000117152,ENSG00000116741,ENSG00000274286,ENSG00000196277,ENSG00000144746,ENSG00000170893,ENSG00000184160,ENSG00000145335,ENSG00000164129,ENSG00000135312,ENSG00000118432,ENSG00000150594,ENSG00000149295,ENSG00000100604,ENSG00000183044,ENSG00000167703,ENSG00000132872,ENSG00000101180
GO:BP	regulation of heart contraction	GO:0008016	0.0171931	1.76464	247	5127	102	18123	ENSG00000158286,ENSG00000175206,ENSG00000090020,ENSG00000116783,ENSG00000171385,ENSG00000163399,ENSG00000143318,ENSG00000198929,ENSG00000117152,ENSG00000143153,ENSG00000116741,ENSG00000058668,ENSG00000135750,ENSG00000198626,ENSG00000119782,ENSG00000171303,ENSG00000013016,ENSG00000183023,ENSG00000115041,ENSG00000162989,ENSG00000114923,ENSG00000163273,ENSG00000068024,ENSG00000150995,ENSG00000157087…
GO:BP	sphingolipid metabolic process	GO:0006665	0.0176034	1.7544	170	5127	75	18123	ENSG00000130768,ENSG00000126091,ENSG00000117069,ENSG00000177628,ENSG00000158850,ENSG00000162630,ENSG00000143753,ENSG00000173409,ENSG00000115317,ENSG00000115525,ENSG00000172318,ENSG00000172292,ENSG00000188452,ENSG00000170266,ENSG00000163932,ENSG00000206527,ENSG00000158220,ENSG00000163590,ENSG00000169255,ENSG00000196542,ENSG00000157404,ENSG00000138744,ENSG00000170522,ENSG00000049860,ENSG00000113163…
GO:BP	axonal fasciculation	GO:0007413	0.0180616	1.74324	21	5127	16	18123	ENSG00000133216,ENSG00000181754,ENSG00000115310,ENSG00000116106,ENSG00000144619,ENSG00000044524,ENSG00000182580,ENSG00000146072,ENSG00000118432,ENSG00000075213,ENSG00000091129,ENSG00000182636,ENSG00000176749,ENSG00000105429,ENSG00000160007,ENSG00000154654
GO:BP	neuron projection fasciculation	GO:0106030	0.0180616	1.74324	21	5127	16	18123	ENSG00000133216,ENSG00000181754,ENSG00000115310,ENSG00000116106,ENSG00000144619,ENSG00000044524,ENSG00000182580,ENSG00000146072,ENSG00000118432,ENSG00000075213,ENSG00000091129,ENSG00000182636,ENSG00000176749,ENSG00000105429,ENSG00000160007,ENSG00000154654
GO:BP	regulation of intracellular protein transport	GO:0033157	0.0181691	1.74067	256	5127	105	18123	ENSG00000159363,ENSG00000175793,ENSG00000121905,ENSG00000178028,ENSG00000203965,ENSG00000174827,ENSG00000143450,ENSG00000152332,ENSG00000120341,ENSG00000119185,ENSG00000115137,ENSG00000068912,ENSG00000221823,ENSG00000115317,ENSG00000135968,ENSG00000134109,ENSG00000163930,ENSG00000163932,ENSG00000082701,ENSG00000114126,ENSG00000114346,ENSG00000109332,ENSG00000109670,ENSG00000164151,ENSG00000145675…
GO:BP	regulation of organelle organization	GO:0033043	0.0181898	1.74017	1228	5127	415	18123	ENSG00000198793,ENSG00000132881,ENSG00000159363,ENSG00000090432,ENSG00000162552,ENSG00000004487,ENSG00000117632,ENSG00000175793,ENSG00000090020,ENSG00000181773,ENSG00000123473,ENSG00000162409,ENSG00000162614,ENSG00000122417,ENSG00000198890,ENSG00000116299,ENSG00000265808,ENSG00000178104,ENSG00000143363,ENSG00000213190,ENSG00000132718,ENSG00000160803,ENSG00000163468,ENSG00000117152,ENSG00000143322…
GO:BP	regulation of extent of cell growth	GO:0061387	0.0183347	1.73673	110	5127	53	18123	ENSG00000162490,ENSG00000134259,ENSG00000143434,ENSG00000196189,ENSG00000143320,ENSG00000115310,ENSG00000119866,ENSG00000135622,ENSG00000114999,ENSG00000078018,ENSG00000163539,ENSG00000144674,ENSG00000247596,ENSG00000082701,ENSG00000082684,ENSG00000131711,ENSG00000053108,ENSG00000113758,ENSG00000137261,ENSG00000135333,ENSG00000136279,ENSG00000106683,ENSG00000075223,ENSG00000170381,ENSG00000075213…
GO:BP	cellular response to organonitrogen compound	GO:0071417	0.018443	1.73417	671	5127	241	18123	ENSG00000078369,ENSG00000067606,ENSG00000198793,ENSG00000004487,ENSG00000179546,ENSG00000090020,ENSG00000142784,ENSG00000130766,ENSG00000116954,ENSG00000117461,ENSG00000142875,ENSG00000181754,ENSG00000143630,ENSG00000143627,ENSG00000158773,ENSG00000117152,ENSG00000135824,ENSG00000058668,ENSG00000136628,ENSG00000077522,ENSG00000198626,ENSG00000172059,ENSG00000134318,ENSG00000119772,ENSG00000171094…
GO:BP	regulation of long-term neuronal synaptic plasticity	GO:0048169	0.0184681	1.73358	23	5127	17	18123	ENSG00000133216,ENSG00000157404,ENSG00000145335,ENSG00000197283,ENSG00000164418,ENSG00000058404,ENSG00000107954,ENSG00000168959,ENSG00000149295,ENSG00000133703,ENSG00000156642,ENSG00000132535,ENSG00000166342,ENSG00000142192,ENSG00000100321,ENSG00000251322,ENSG00000102003
GO:BP	positive regulation of long-term synaptic potentiation	GO:1900273	0.0184681	1.73358	23	5127	17	18123	ENSG00000133216,ENSG00000118260,ENSG00000196549,ENSG00000164742,ENSG00000189056,ENSG00000104219,ENSG00000149295,ENSG00000154146,ENSG00000179841,ENSG00000100600,ENSG00000175344,ENSG00000128829,ENSG00000156642,ENSG00000105662,ENSG00000142192,ENSG00000128271,ENSG00000251322
GO:BP	regulation of anatomical structure size	GO:0090066	0.0202102	1.69443	519	5127	192	18123	ENSG00000198793,ENSG00000162490,ENSG00000011021,ENSG00000175206,ENSG00000120937,ENSG00000159363,ENSG00000004487,ENSG00000179546,ENSG00000142784,ENSG00000169213,ENSG00000134215,ENSG00000134259,ENSG00000131779,ENSG00000143434,ENSG00000196189,ENSG00000143320,ENSG00000116741,ENSG00000143761,ENSG00000077522,ENSG00000117020,ENSG00000119185,ENSG00000134318,ENSG00000197872,ENSG00000163171,ENSG00000183023…
GO:BP	dendrite extension	GO:0097484	0.0230946	1.63649	36	5127	23	18123	ENSG00000090432,ENSG00000143858,ENSG00000119866,ENSG00000144550,ENSG00000055163,ENSG00000124772,ENSG00000079841,ENSG00000112290,ENSG00000185345,ENSG00000198742,ENSG00000176406,ENSG00000107295,ENSG00000137055,ENSG00000067715,ENSG00000100884,ENSG00000141576,ENSG00000132872,ENSG00000049759,ENSG00000130477,ENSG00000213023,ENSG00000105605,ENSG00000089057,ENSG00000198689
GO:BP	response to cocaine	GO:0042220	0.0235138	1.62868	57	5127	32	18123	ENSG00000198793,ENSG00000162374,ENSG00000160716,ENSG00000117152,ENSG00000119772,ENSG00000144381,ENSG00000157103,ENSG00000164082,ENSG00000145335,ENSG00000145708,ENSG00000152413,ENSG00000204371,ENSG00000096384,ENSG00000135312,ENSG00000118432,ENSG00000196591,ENSG00000164885,ENSG00000092964,ENSG00000120899,ENSG00000082556,ENSG00000106688,ENSG00000044574,ENSG00000149295,ENSG00000102468,ENSG00000103942…
GO:BP	modification-dependent protein catabolic process	GO:0019941	0.0238687	1.62217	670	5127	240	18123	ENSG00000107404,ENSG00000130939,ENSG00000116661,ENSG00000132879,ENSG00000090686,ENSG00000116514,ENSG00000126067,ENSG00000126107,ENSG00000186094,ENSG00000123091,ENSG00000162378,ENSG00000174842,ENSG00000177628,ENSG00000160803,ENSG00000143207,ENSG00000143476,ENSG00000168159,ENSG00000119283,ENSG00000171150,ENSG00000068912,ENSG00000197329,ENSG00000116005,ENSG00000153561,ENSG00000115539,ENSG00000153107…
GO:BP	positive regulation of cell junction assembly	GO:1901890	0.025314	1.59664	103	5127	50	18123	ENSG00000131697,ENSG00000171603,ENSG00000162552,ENSG00000133216,ENSG00000117114,ENSG00000181754,ENSG00000196189,ENSG00000198400,ENSG00000119185,ENSG00000179915,ENSG00000175928,ENSG00000154928,ENSG00000158258,ENSG00000121871,ENSG00000169760,ENSG00000182580,ENSG00000163347,ENSG00000152208,ENSG00000146006,ENSG00000135298,ENSG00000146242,ENSG00000173114,ENSG00000174469,ENSG00000181790,ENSG00000174482…
GO:BP	anatomical structure development	GO:0048856	0.0257176	1.58977	6164	5127	1867	18123	ENSG00000186891,ENSG00000107404,ENSG00000189339,ENSG00000078369,ENSG00000067606,ENSG00000157933,ENSG00000197921,ENSG00000196581,ENSG00000131697,ENSG00000116254,ENSG00000158286,ENSG00000171603,ENSG00000198793,ENSG00000171819,ENSG00000204624,ENSG00000162490,ENSG00000177000,ENSG00000175206,ENSG00000120937,ENSG00000116731,ENSG00000189337,ENSG00000158747,ENSG00000090432,ENSG00000076864,ENSG00000162552…
GO:BP	anterograde axonal transport	GO:0008089	0.0259292	1.58621	50	5127	29	18123	ENSG00000186094,ENSG00000021574,ENSG00000168280,ENSG00000078018,ENSG00000130294,ENSG00000182606,ENSG00000137463,ENSG00000177879,ENSG00000131437,ENSG00000047579,ENSG00000277586,ENSG00000070718,ENSG00000147642,ENSG00000135049,ENSG00000185009,ENSG00000130643,ENSG00000174871,ENSG00000150672,ENSG00000165714,ENSG00000155980,ENSG00000166963,ENSG00000103723,ENSG00000138834,ENSG00000132604,ENSG00000173805…
GO:BP	visual behavior	GO:0007632	0.0259292	1.58621	50	5127	29	18123	ENSG00000131697,ENSG00000198793,ENSG00000160716,ENSG00000118260,ENSG00000187094,ENSG00000157404,ENSG00000113161,ENSG00000184845,ENSG00000169220,ENSG00000197283,ENSG00000157764,ENSG00000164885,ENSG00000085788,ENSG00000123454,ENSG00000176884,ENSG00000177963,ENSG00000006071,ENSG00000149295,ENSG00000172425,ENSG00000133703,ENSG00000198673,ENSG00000134138,ENSG00000156642,ENSG00000183454,ENSG00000103034…
GO:BP	vesicle docking involved in exocytosis	GO:0006904	0.0262271	1.58125	43	5127	26	18123	ENSG00000169213,ENSG00000136631,ENSG00000144118,ENSG00000184178,ENSG00000152932,ENSG00000145920,ENSG00000106089,ENSG00000131558,ENSG00000198722,ENSG00000136854,ENSG00000138190,ENSG00000137501,ENSG00000160695,ENSG00000139719,ENSG00000139998,ENSG00000104142,ENSG00000137766,ENSG00000184056,ENSG00000099365,ENSG00000105514,ENSG00000130477,ENSG00000105649,ENSG00000177380,ENSG00000101298,ENSG00000132639…
GO:BP	cerebellum development	GO:0021549	0.0284529	1.54587	106	5127	51	18123	ENSG00000253368,ENSG00000173406,ENSG00000177628,ENSG00000084676,ENSG00000179915,ENSG00000123607,ENSG00000171450,ENSG00000183873,ENSG00000109819,ENSG00000138668,ENSG00000152208,ENSG00000105953,ENSG00000105887,ENSG00000164885,ENSG00000135049,ENSG00000044574,ENSG00000168267,ENSG00000138311,ENSG00000171798,ENSG00000184524,ENSG00000129159,ENSG00000172409,ENSG00000173898,ENSG00000149269,ENSG00000095139…
GO:BP	dense core granule exocytosis	GO:1990504	0.0288703	1.53955	9	5127	9	18123	ENSG00000134207,ENSG00000163618,ENSG00000081803,ENSG00000198722,ENSG00000136854,ENSG00000137766,ENSG00000007516,ENSG00000132872,ENSG00000130477
GO:BP	neuron migration	GO:0001764	0.0294279	1.53124	158	5127	70	18123	ENSG00000173406,ENSG00000162631,ENSG00000143126,ENSG00000171943,ENSG00000152092,ENSG00000116141,ENSG00000066032,ENSG00000153234,ENSG00000119042,ENSG00000178568,ENSG00000171450,ENSG00000187957,ENSG00000077097,ENSG00000168036,ENSG00000187094,ENSG00000144647,ENSG00000174013,ENSG00000109756,ENSG00000150625,ENSG00000131711,ENSG00000081189,ENSG00000152377,ENSG00000070808,ENSG00000184845,ENSG00000137267…
GO:BP	secretion	GO:0046903	0.0294982	1.5302	1492	5127	494	18123	ENSG00000107404,ENSG00000069424,ENSG00000175206,ENSG00000120937,ENSG00000132881,ENSG00000159363,ENSG00000162545,ENSG00000179163,ENSG00000131236,ENSG00000117016,ENSG00000187048,ENSG00000169213,ENSG00000143126,ENSG00000177301,ENSG00000134207,ENSG00000159164,ENSG00000136631,ENSG00000143369,ENSG00000143457,ENSG00000160714,ENSG00000160716,ENSG00000132718,ENSG00000122218,ENSG00000143195,ENSG00000116260…
GO:BP	establishment of vesicle localization	GO:0051650	0.0300649	1.52194	212	5127	89	18123	ENSG00000067606,ENSG00000137942,ENSG00000265808,ENSG00000132718,ENSG00000075945,ENSG00000197959,ENSG00000120341,ENSG00000117153,ENSG00000143786,ENSG00000143761,ENSG00000180398,ENSG00000074054,ENSG00000168280,ENSG00000078018,ENSG00000118242,ENSG00000036257,ENSG00000130294,ENSG00000163539,ENSG00000168036,ENSG00000182606,ENSG00000113966,ENSG00000169760,ENSG00000174007,ENSG00000197386,ENSG00000138674…
GO:BP	negative regulation of cell projection organization	GO:0031345	0.0304304	1.51669	192	5127	82	18123	ENSG00000162490,ENSG00000076864,ENSG00000133216,ENSG00000173406,ENSG00000122417,ENSG00000171943,ENSG00000143434,ENSG00000196189,ENSG00000197959,ENSG00000179915,ENSG00000115310,ENSG00000119866,ENSG00000114956,ENSG00000135622,ENSG00000078018,ENSG00000116106,ENSG00000066248,ENSG00000163932,ENSG00000082684,ENSG00000169760,ENSG00000072832,ENSG00000145147,ENSG00000138814,ENSG00000109756,ENSG00000053108…
GO:BP	regulation of calcium ion transmembrane transporter activity	GO:1901019	0.03044	1.51655	93	5127	46	18123	ENSG00000175206,ENSG00000090020,ENSG00000121905,ENSG00000143318,ENSG00000198929,ENSG00000143153,ENSG00000198626,ENSG00000119782,ENSG00000013016,ENSG00000182389,ENSG00000144681,ENSG00000213533,ENSG00000197386,ENSG00000109689,ENSG00000145362,ENSG00000145349,ENSG00000153956,ENSG00000164885,ENSG00000104369,ENSG00000135018,ENSG00000165995,ENSG00000227877,ENSG00000150594,ENSG00000167323,ENSG00000170290…
GO:BP	olfactory bulb development	GO:0021772	0.0307957	1.51151	32	5127	21	18123	ENSG00000157933,ENSG00000115738,ENSG00000178568,ENSG00000185008,ENSG00000169855,ENSG00000145147,ENSG00000105953,ENSG00000075213,ENSG00000105880,ENSG00000128610,ENSG00000092964,ENSG00000182197,ENSG00000135049,ENSG00000106689,ENSG00000187122,ENSG00000188906,ENSG00000165533,ENSG00000103494,ENSG00000099617,ENSG00000174951,ENSG00000169136
GO:BP	positive regulation of synaptic transmission, glutamatergic	GO:0051968	0.0307957	1.51151	32	5127	21	18123	ENSG00000198400,ENSG00000179915,ENSG00000115839,ENSG00000169760,ENSG00000184845,ENSG00000189056,ENSG00000120899,ENSG00000136854,ENSG00000162105,ENSG00000006116,ENSG00000169992,ENSG00000075429,ENSG00000075461,ENSG00000141433,ENSG00000121297,ENSG00000161681,ENSG00000105605,ENSG00000142408,ENSG00000128271,ENSG00000166862,ENSG00000251322
GO:BP	cellular component biogenesis	GO:0044085	0.031765	1.49805	3377	5127	1056	18123	ENSG00000188976,ENSG00000107404,ENSG00000067606,ENSG00000197921,ENSG00000131697,ENSG00000187017,ENSG00000162408,ENSG00000171603,ENSG00000175279,ENSG00000142655,ENSG00000198793,ENSG00000132881,ENSG00000159363,ENSG00000117245,ENSG00000076864,ENSG00000162552,ENSG00000133216,ENSG00000117632,ENSG00000090020,ENSG00000198492,ENSG00000116329,ENSG00000159023,ENSG00000162521,ENSG00000126067,ENSG00000174574…
GO:BP	ubiquitin-dependent protein catabolic process	GO:0006511	0.0319127	1.49604	663	5127	237	18123	ENSG00000107404,ENSG00000130939,ENSG00000116661,ENSG00000132879,ENSG00000090686,ENSG00000116514,ENSG00000126067,ENSG00000126107,ENSG00000186094,ENSG00000123091,ENSG00000162378,ENSG00000174842,ENSG00000177628,ENSG00000160803,ENSG00000143207,ENSG00000143476,ENSG00000168159,ENSG00000119283,ENSG00000171150,ENSG00000068912,ENSG00000197329,ENSG00000153561,ENSG00000115539,ENSG00000153107,ENSG00000036257…
GO:BP	positive regulation of exocytosis	GO:0045921	0.032946	1.4822	88	5127	44	18123	ENSG00000175206,ENSG00000159363,ENSG00000143761,ENSG00000163032,ENSG00000115884,ENSG00000074054,ENSG00000171450,ENSG00000163539,ENSG00000186792,ENSG00000163618,ENSG00000169760,ENSG00000145335,ENSG00000169194,ENSG00000118432,ENSG00000164506,ENSG00000106089,ENSG00000188372,ENSG00000081803,ENSG00000164885,ENSG00000137575,ENSG00000136854,ENSG00000107130,ENSG00000136738,ENSG00000165995,ENSG00000011347…
GO:BP	peptide hormone secretion	GO:0030072	0.033149	1.47953	259	5127	105	18123	ENSG00000162545,ENSG00000160714,ENSG00000143195,ENSG00000198216,ENSG00000170498,ENSG00000163032,ENSG00000170745,ENSG00000119782,ENSG00000171132,ENSG00000135631,ENSG00000125618,ENSG00000123612,ENSG00000091428,ENSG00000118263,ENSG00000054356,ENSG00000169047,ENSG00000132326,ENSG00000115687,ENSG00000150995,ENSG00000170011,ENSG00000007402,ENSG00000157388,ENSG00000170837,ENSG00000145087,ENSG00000173175…
GO:BP	positive regulation of intracellular protein transport	GO:0090316	0.0345545	1.4615	184	5127	79	18123	ENSG00000175793,ENSG00000121905,ENSG00000178028,ENSG00000203965,ENSG00000174827,ENSG00000143450,ENSG00000120341,ENSG00000119185,ENSG00000221823,ENSG00000115317,ENSG00000134109,ENSG00000163930,ENSG00000163932,ENSG00000082701,ENSG00000114126,ENSG00000114346,ENSG00000109332,ENSG00000109670,ENSG00000164151,ENSG00000145675,ENSG00000131437,ENSG00000171720,ENSG00000173210,ENSG00000204390,ENSG00000112062…
GO:BP	protein modification by small protein conjugation	GO:0032446	0.0369187	1.43275	980	5127	336	18123	ENSG00000130939,ENSG00000175279,ENSG00000142655,ENSG00000198793,ENSG00000116661,ENSG00000132879,ENSG00000090432,ENSG00000004487,ENSG00000142784,ENSG00000130772,ENSG00000116514,ENSG00000126067,ENSG00000126107,ENSG00000123091,ENSG00000058804,ENSG00000174842,ENSG00000160714,ENSG00000160753,ENSG00000143164,ENSG00000143207,ENSG00000121481,ENSG00000134371,ENSG00000077152,ENSG00000117153,ENSG00000082512…
GO:BP	regulation of protein dephosphorylation	GO:0035304	0.0375251	1.42568	145	5127	65	18123	ENSG00000171735,ENSG00000198793,ENSG00000117602,ENSG00000177628,ENSG00000143155,ENSG00000134318,ENSG00000119782,ENSG00000221823,ENSG00000152127,ENSG00000150722,ENSG00000196950,ENSG00000163932,ENSG00000082701,ENSG00000197386,ENSG00000074211,ENSG00000156463,ENSG00000156475,ENSG00000112137,ENSG00000204569,ENSG00000112640,ENSG00000096384,ENSG00000172348,ENSG00000112419,ENSG00000198729,ENSG00000225968…
GO:BP	synaptic vesicle transport	GO:0048489	0.0385579	1.41389	46	5127	27	18123	ENSG00000197959,ENSG00000143761,ENSG00000168280,ENSG00000078018,ENSG00000168036,ENSG00000169760,ENSG00000145335,ENSG00000177879,ENSG00000047579,ENSG00000065609,ENSG00000185345,ENSG00000164885,ENSG00000092964,ENSG00000070718,ENSG00000106976,ENSG00000136827,ENSG00000185009,ENSG00000174871,ENSG00000165714,ENSG00000188906,ENSG00000155980,ENSG00000111052,ENSG00000103723,ENSG00000065000,ENSG00000105649…
GO:BP	excitatory synapse assembly	GO:1904861	0.0392281	1.4064	28	5127	19	18123	ENSG00000196189,ENSG00000179915,ENSG00000162951,ENSG00000169760,ENSG00000152208,ENSG00000146006,ENSG00000128594,ENSG00000110076,ENSG00000162105,ENSG00000214376,ENSG00000156642,ENSG00000140538,ENSG00000102924,ENSG00000169992,ENSG00000105426,ENSG00000128011,ENSG00000131409,ENSG00000161681,ENSG00000251322
GO:BP	glycosphingolipid metabolic process	GO:0006687	0.039621	1.40207	68	5127	36	18123	ENSG00000126091,ENSG00000117069,ENSG00000177628,ENSG00000158850,ENSG00000162630,ENSG00000115525,ENSG00000172318,ENSG00000170266,ENSG00000163932,ENSG00000158220,ENSG00000169255,ENSG00000157404,ENSG00000049860,ENSG00000204386,ENSG00000117868,ENSG00000008513,ENSG00000070610,ENSG00000148154,ENSG00000160408,ENSG00000162139,ENSG00000111728,ENSG00000139641,ENSG00000135454,ENSG00000054983,ENSG00000140557…
GO:BP	G protein-coupled glutamate receptor signaling pathway	GO:0007216	0.0414227	1.38276	16	5127	13	18123	ENSG00000163873,ENSG00000196277,ENSG00000164082,ENSG00000152413,ENSG00000113262,ENSG00000124493,ENSG00000152822,ENSG00000164535,ENSG00000179603,ENSG00000134780,ENSG00000168959,ENSG00000103942,ENSG00000051128
GO:BP	modification-dependent macromolecule catabolic process	GO:0043632	0.041424	1.38275	681	5127	242	18123	ENSG00000107404,ENSG00000130939,ENSG00000116661,ENSG00000132879,ENSG00000090686,ENSG00000116514,ENSG00000126067,ENSG00000126107,ENSG00000186094,ENSG00000123091,ENSG00000162378,ENSG00000174842,ENSG00000177628,ENSG00000160803,ENSG00000143207,ENSG00000143476,ENSG00000168159,ENSG00000119283,ENSG00000171150,ENSG00000068912,ENSG00000197329,ENSG00000116005,ENSG00000153561,ENSG00000115539,ENSG00000153107…
GO:BP	central nervous system projection neuron axonogenesis	GO:0021952	0.0432118	1.3644	26	5127	18	18123	ENSG00000162490,ENSG00000133216,ENSG00000160716,ENSG00000153234,ENSG00000116106,ENSG00000154928,ENSG00000182580,ENSG00000174013,ENSG00000145147,ENSG00000221866,ENSG00000133083,ENSG00000005810,ENSG00000100503,ENSG00000007168,ENSG00000187323,ENSG00000160460,ENSG00000197381,ENSG00000077279
GO:BP	positive regulation of cell growth	GO:0030307	0.0459032	1.33816	171	5127	74	18123	ENSG00000198793,ENSG00000090432,ENSG00000175793,ENSG00000090020,ENSG00000134259,ENSG00000143320,ENSG00000143858,ENSG00000119866,ENSG00000144550,ENSG00000144674,ENSG00000247596,ENSG00000131711,ENSG00000113758,ENSG00000124772,ENSG00000079841,ENSG00000185345,ENSG00000213066,ENSG00000136279,ENSG00000146678,ENSG00000106683,ENSG00000198742,ENSG00000105887,ENSG00000120899,ENSG00000012232,ENSG00000157168…
GO:BP	mitochondrion transport along microtubule	GO:0047497	0.0465605	1.33198	24	5127	17	18123	ENSG00000186094,ENSG00000021574,ENSG00000138095,ENSG00000182606,ENSG00000198836,ENSG00000154277,ENSG00000137463,ENSG00000131711,ENSG00000112290,ENSG00000277586,ENSG00000147642,ENSG00000135049,ENSG00000126858,ENSG00000173805,ENSG00000186868,ENSG00000130479,ENSG00000102401
GO:BP	establishment of mitochondrion localization, microtubule-mediated	GO:0034643	0.0465605	1.33198	24	5127	17	18123	ENSG00000186094,ENSG00000021574,ENSG00000138095,ENSG00000182606,ENSG00000198836,ENSG00000154277,ENSG00000137463,ENSG00000131711,ENSG00000112290,ENSG00000277586,ENSG00000147642,ENSG00000135049,ENSG00000126858,ENSG00000173805,ENSG00000186868,ENSG00000130479,ENSG00000102401
GO:BP	regulation of synaptic vesicle endocytosis	GO:1900242	0.0468932	1.32889	18	5127	14	18123	ENSG00000132718,ENSG00000117533,ENSG00000169760,ENSG00000161203,ENSG00000145214,ENSG00000183826,ENSG00000106976,ENSG00000136827,ENSG00000107758,ENSG00000087470,ENSG00000188906,ENSG00000198668,ENSG00000160014,ENSG00000104888
GO:BP	regulation of postsynaptic neurotransmitter receptor activity	GO:0098962	0.0468932	1.32889	18	5127	14	18123	ENSG00000116544,ENSG00000152413,ENSG00000106236,ENSG00000198010,ENSG00000174871,ENSG00000183092,ENSG00000237515,ENSG00000075429,ENSG00000075461,ENSG00000171246,ENSG00000170579,ENSG00000080845,ENSG00000197122,ENSG00000221890
GO:BP	regulation of axon extension	GO:0030516	0.0490641	1.30924	97	5127	47	18123	ENSG00000162490,ENSG00000143434,ENSG00000196189,ENSG00000115310,ENSG00000119866,ENSG00000135622,ENSG00000114999,ENSG00000078018,ENSG00000163539,ENSG00000144674,ENSG00000247596,ENSG00000082701,ENSG00000082684,ENSG00000131711,ENSG00000113758,ENSG00000137261,ENSG00000136279,ENSG00000106683,ENSG00000075223,ENSG00000170381,ENSG00000075213,ENSG00000153993,ENSG00000091129,ENSG00000221866,ENSG00000164885…
GO:BP	phosphatidylinositol biosynthetic process	GO:0006661	0.0491131	1.3088	146	5127	65	18123	ENSG00000117461,ENSG00000143315,ENSG00000135845,ENSG00000162813,ENSG00000143761,ENSG00000168118,ENSG00000035115,ENSG00000084710,ENSG00000171150,ENSG00000040933,ENSG00000197121,ENSG00000155744,ENSG00000211456,ENSG00000068745,ENSG00000176095,ENSG00000196455,ENSG00000051382,ENSG00000119227,ENSG00000163624,ENSG00000109452,ENSG00000150712,ENSG00000145675,ENSG00000112367,ENSG00000106086,ENSG00000104643…
GO:CC	synapse	GO:0045202	1.12098e-89	88.9504	1348	5369	724	18964	ENSG00000107404,ENSG00000205090,ENSG00000078369,ENSG00000187730,ENSG00000067606,ENSG00000158109,ENSG00000131697,ENSG00000069424,ENSG00000171603,ENSG00000241563,ENSG00000198793,ENSG00000116661,ENSG00000177000,ENSG00000162545,ENSG00000189410,ENSG00000133216,ENSG00000179546,ENSG00000125944,ENSG00000204178,ENSG00000116329,ENSG00000159023,ENSG00000121764,ENSG00000121905,ENSG00000116544,ENSG00000020129…
GO:CC	neuron projection	GO:0043005	6.01042e-71	70.2211	1384	5369	699	18964	ENSG00000107404,ENSG00000078369,ENSG00000187730,ENSG00000067606,ENSG00000158109,ENSG00000131697,ENSG00000069424,ENSG00000187017,ENSG00000171680,ENSG00000171603,ENSG00000198793,ENSG00000116661,ENSG00000159363,ENSG00000162545,ENSG00000090432,ENSG00000117245,ENSG00000076864,ENSG00000070886,ENSG00000133216,ENSG00000179546,ENSG00000125944,ENSG00000204178,ENSG00000117632,ENSG00000116329,ENSG00000121905…
GO:CC	somatodendritic compartment	GO:0036477	2.72702e-59	58.5643	875	5369	476	18964	ENSG00000107404,ENSG00000078369,ENSG00000187730,ENSG00000067606,ENSG00000171603,ENSG00000198793,ENSG00000116661,ENSG00000175206,ENSG00000159363,ENSG00000162545,ENSG00000090432,ENSG00000117245,ENSG00000076864,ENSG00000133216,ENSG00000179546,ENSG00000125944,ENSG00000116329,ENSG00000121905,ENSG00000020129,ENSG00000163873,ENSG00000117400,ENSG00000162374,ENSG00000157193,ENSG00000162409,ENSG00000173406…
GO:CC	cell junction	GO:0030054	3.05748e-53	52.5146	2107	5369	914	18964	ENSG00000107404,ENSG00000205090,ENSG00000078369,ENSG00000187730,ENSG00000067606,ENSG00000158109,ENSG00000196581,ENSG00000131697,ENSG00000069424,ENSG00000171680,ENSG00000171603,ENSG00000241563,ENSG00000198793,ENSG00000116661,ENSG00000177000,ENSG00000189337,ENSG00000162545,ENSG00000189410,ENSG00000133216,ENSG00000179546,ENSG00000125944,ENSG00000204178,ENSG00000090020,ENSG00000116329,ENSG00000159023…
GO:CC	postsynapse	GO:0098794	8.15439e-53	52.0886	641	5369	368	18964	ENSG00000107404,ENSG00000187730,ENSG00000067606,ENSG00000171603,ENSG00000198793,ENSG00000116661,ENSG00000162545,ENSG00000189410,ENSG00000133216,ENSG00000116329,ENSG00000159023,ENSG00000121905,ENSG00000116544,ENSG00000020129,ENSG00000163873,ENSG00000085832,ENSG00000157193,ENSG00000173406,ENSG00000116675,ENSG00000117114,ENSG00000117600,ENSG00000197106,ENSG00000177272,ENSG00000171385,ENSG00000163399…
GO:CC	axon	GO:0030424	1.52594e-51	50.8165	661	5369	374	18964	ENSG00000107404,ENSG00000187730,ENSG00000067606,ENSG00000158109,ENSG00000069424,ENSG00000171680,ENSG00000090432,ENSG00000076864,ENSG00000133216,ENSG00000125944,ENSG00000204178,ENSG00000116329,ENSG00000121905,ENSG00000163873,ENSG00000186094,ENSG00000162374,ENSG00000157193,ENSG00000162409,ENSG00000162614,ENSG00000117114,ENSG00000181754,ENSG00000116396,ENSG00000177301,ENSG00000177272,ENSG00000134259…
GO:CC	dendritic tree	GO:0097447	1.49383e-48	47.8257	643	5369	361	18964	ENSG00000107404,ENSG00000078369,ENSG00000187730,ENSG00000171603,ENSG00000198793,ENSG00000116661,ENSG00000162545,ENSG00000117245,ENSG00000076864,ENSG00000133216,ENSG00000179546,ENSG00000125944,ENSG00000116329,ENSG00000121905,ENSG00000020129,ENSG00000163873,ENSG00000162374,ENSG00000157193,ENSG00000162409,ENSG00000181754,ENSG00000116396,ENSG00000177301,ENSG00000171385,ENSG00000134259,ENSG00000265241…
GO:CC	dendrite	GO:0030425	1.85397e-48	47.7319	641	5369	360	18964	ENSG00000107404,ENSG00000078369,ENSG00000187730,ENSG00000171603,ENSG00000198793,ENSG00000116661,ENSG00000162545,ENSG00000117245,ENSG00000076864,ENSG00000133216,ENSG00000179546,ENSG00000125944,ENSG00000116329,ENSG00000121905,ENSG00000020129,ENSG00000163873,ENSG00000162374,ENSG00000157193,ENSG00000162409,ENSG00000181754,ENSG00000116396,ENSG00000177301,ENSG00000171385,ENSG00000134259,ENSG00000265241…
GO:CC	synaptic membrane	GO:0097060	1.02552e-45	44.9891	384	5369	245	18964	ENSG00000205090,ENSG00000187730,ENSG00000171603,ENSG00000133216,ENSG00000116329,ENSG00000163873,ENSG00000117016,ENSG00000117114,ENSG00000117600,ENSG00000162631,ENSG00000177301,ENSG00000177272,ENSG00000171385,ENSG00000134207,ENSG00000160716,ENSG00000132718,ENSG00000197959,ENSG00000058668,ENSG00000143473,ENSG00000143786,ENSG00000135750,ENSG00000077522,ENSG00000115155,ENSG00000183023,ENSG00000179915…
GO:CC	presynapse	GO:0098793	8.07274e-44	43.093	515	5369	299	18964	ENSG00000107404,ENSG00000158109,ENSG00000133216,ENSG00000125944,ENSG00000116329,ENSG00000163873,ENSG00000117016,ENSG00000169213,ENSG00000116675,ENSG00000162631,ENSG00000197106,ENSG00000177301,ENSG00000177272,ENSG00000134207,ENSG00000134259,ENSG00000265808,ENSG00000159164,ENSG00000136631,ENSG00000160716,ENSG00000143630,ENSG00000132718,ENSG00000117533,ENSG00000197959,ENSG00000135823,ENSG00000143858…
GO:CC	neuron to neuron synapse	GO:0098984	4.97e-41	40.3036	371	5369	232	18964	ENSG00000107404,ENSG00000067606,ENSG00000171603,ENSG00000162545,ENSG00000189410,ENSG00000116329,ENSG00000159023,ENSG00000116544,ENSG00000157193,ENSG00000173406,ENSG00000116675,ENSG00000117600,ENSG00000171385,ENSG00000163399,ENSG00000160753,ENSG00000132718,ENSG00000197959,ENSG00000143473,ENSG00000143740,ENSG00000143761,ENSG00000077522,ENSG00000138101,ENSG00000115194,ENSG00000183023,ENSG00000115310…
GO:CC	postsynaptic specialization	GO:0099572	7.73802e-39	38.1114	363	5369	225	18964	ENSG00000107404,ENSG00000067606,ENSG00000171603,ENSG00000162545,ENSG00000189410,ENSG00000116329,ENSG00000159023,ENSG00000116544,ENSG00000157193,ENSG00000173406,ENSG00000116675,ENSG00000117600,ENSG00000171385,ENSG00000163399,ENSG00000160716,ENSG00000160753,ENSG00000132718,ENSG00000197959,ENSG00000143473,ENSG00000143740,ENSG00000143761,ENSG00000077522,ENSG00000138101,ENSG00000183023,ENSG00000115310…
GO:CC	glutamatergic synapse	GO:0098978	1.43861e-37	36.8421	354	5369	219	18964	ENSG00000107404,ENSG00000187730,ENSG00000067606,ENSG00000171603,ENSG00000198793,ENSG00000133216,ENSG00000121905,ENSG00000116544,ENSG00000163873,ENSG00000162374,ENSG00000085832,ENSG00000117114,ENSG00000117600,ENSG00000162631,ENSG00000197106,ENSG00000177272,ENSG00000134207,ENSG00000159164,ENSG00000198929,ENSG00000197959,ENSG00000058668,ENSG00000143740,ENSG00000143761,ENSG00000077522,ENSG00000115194…
GO:CC	asymmetric synapse	GO:0032279	1.45507e-37	36.8371	345	5369	215	18964	ENSG00000107404,ENSG00000067606,ENSG00000171603,ENSG00000162545,ENSG00000189410,ENSG00000116329,ENSG00000159023,ENSG00000116544,ENSG00000157193,ENSG00000173406,ENSG00000116675,ENSG00000117600,ENSG00000171385,ENSG00000163399,ENSG00000160753,ENSG00000132718,ENSG00000197959,ENSG00000143473,ENSG00000143740,ENSG00000143761,ENSG00000077522,ENSG00000138101,ENSG00000183023,ENSG00000115310,ENSG00000119866…
GO:CC	plasma membrane bounded cell projection	GO:0120025	9.96402e-37	36.0016	2234	5369	902	18964	ENSG00000107404,ENSG00000078369,ENSG00000187730,ENSG00000067606,ENSG00000158109,ENSG00000131697,ENSG00000069424,ENSG00000187017,ENSG00000171680,ENSG00000171603,ENSG00000198793,ENSG00000116661,ENSG00000132881,ENSG00000159363,ENSG00000162545,ENSG00000090432,ENSG00000117245,ENSG00000076864,ENSG00000070886,ENSG00000133216,ENSG00000179546,ENSG00000125944,ENSG00000204178,ENSG00000117632,ENSG00000090020…
GO:CC	postsynaptic density	GO:0014069	1.02291e-36	35.9902	339	5369	211	18964	ENSG00000107404,ENSG00000067606,ENSG00000171603,ENSG00000162545,ENSG00000189410,ENSG00000116329,ENSG00000159023,ENSG00000116544,ENSG00000157193,ENSG00000173406,ENSG00000116675,ENSG00000117600,ENSG00000171385,ENSG00000163399,ENSG00000160753,ENSG00000132718,ENSG00000197959,ENSG00000143473,ENSG00000143740,ENSG00000143761,ENSG00000077522,ENSG00000138101,ENSG00000183023,ENSG00000115310,ENSG00000119866…
GO:CC	cell projection	GO:0042995	1.12973e-36	35.947	2337	5369	936	18964	ENSG00000107404,ENSG00000078369,ENSG00000187730,ENSG00000067606,ENSG00000158109,ENSG00000131697,ENSG00000069424,ENSG00000187017,ENSG00000171680,ENSG00000171603,ENSG00000198793,ENSG00000116661,ENSG00000175206,ENSG00000132881,ENSG00000159363,ENSG00000162545,ENSG00000090432,ENSG00000117245,ENSG00000076864,ENSG00000070886,ENSG00000133216,ENSG00000179546,ENSG00000125944,ENSG00000204178,ENSG00000117632…
GO:CC	postsynaptic membrane	GO:0045211	1.55786e-34	33.8075	282	5369	182	18964	ENSG00000187730,ENSG00000171603,ENSG00000133216,ENSG00000116329,ENSG00000163873,ENSG00000117114,ENSG00000117600,ENSG00000177272,ENSG00000171385,ENSG00000160716,ENSG00000197959,ENSG00000143473,ENSG00000143786,ENSG00000077522,ENSG00000183023,ENSG00000135622,ENSG00000176204,ENSG00000162951,ENSG00000178568,ENSG00000116106,ENSG00000196277,ENSG00000156959,ENSG00000157087,ENSG00000157103,ENSG00000144596…
GO:CC	distal axon	GO:0150034	1.43185e-30	29.8441	307	5369	187	18964	ENSG00000107404,ENSG00000158109,ENSG00000125944,ENSG00000116329,ENSG00000163873,ENSG00000162374,ENSG00000177301,ENSG00000177272,ENSG00000143630,ENSG00000132718,ENSG00000122218,ENSG00000116852,ENSG00000082482,ENSG00000143801,ENSG00000116903,ENSG00000183023,ENSG00000179915,ENSG00000115977,ENSG00000162951,ENSG00000115041,ENSG00000168280,ENSG00000144290,ENSG00000128683,ENSG00000170396,ENSG00000003393…
GO:CC	neuronal cell body	GO:0043025	8.34572e-30	29.0785	523	5369	275	18964	ENSG00000107404,ENSG00000187730,ENSG00000067606,ENSG00000198793,ENSG00000175206,ENSG00000159363,ENSG00000162545,ENSG00000090432,ENSG00000076864,ENSG00000133216,ENSG00000121905,ENSG00000020129,ENSG00000163873,ENSG00000117400,ENSG00000162374,ENSG00000157193,ENSG00000162409,ENSG00000173406,ENSG00000181754,ENSG00000116396,ENSG00000177301,ENSG00000171385,ENSG00000265241,ENSG00000159164,ENSG00000143630…
GO:CC	cell body	GO:0044297	1.03826e-29	28.9837	595	5369	303	18964	ENSG00000107404,ENSG00000078369,ENSG00000187730,ENSG00000067606,ENSG00000198793,ENSG00000175206,ENSG00000159363,ENSG00000162545,ENSG00000090432,ENSG00000076864,ENSG00000133216,ENSG00000121905,ENSG00000020129,ENSG00000163873,ENSG00000117400,ENSG00000162374,ENSG00000157193,ENSG00000162409,ENSG00000173406,ENSG00000181754,ENSG00000116396,ENSG00000177301,ENSG00000171385,ENSG00000265241,ENSG00000159164…
GO:CC	cation channel complex	GO:0034703	3.39047e-27	26.4697	227	5369	146	18964	ENSG00000069424,ENSG00000162494,ENSG00000163873,ENSG00000117013,ENSG00000118733,ENSG00000181754,ENSG00000116396,ENSG00000177301,ENSG00000177272,ENSG00000171385,ENSG00000198929,ENSG00000198216,ENSG00000143473,ENSG00000082482,ENSG00000143786,ENSG00000135750,ENSG00000198626,ENSG00000162975,ENSG00000170745,ENSG00000119782,ENSG00000115041,ENSG00000175497,ENSG00000182389,ENSG00000162989,ENSG00000153253…
GO:CC	ion channel complex	GO:0034702	7.68409e-25	24.1144	302	5369	175	18964	ENSG00000187730,ENSG00000069424,ENSG00000162494,ENSG00000186510,ENSG00000163873,ENSG00000117013,ENSG00000142959,ENSG00000197147,ENSG00000118733,ENSG00000121940,ENSG00000181754,ENSG00000116396,ENSG00000177301,ENSG00000177272,ENSG00000171385,ENSG00000160716,ENSG00000198929,ENSG00000198216,ENSG00000143473,ENSG00000082482,ENSG00000143786,ENSG00000135750,ENSG00000198626,ENSG00000162975,ENSG00000170745…
GO:CC	transmembrane transporter complex	GO:1902495	1.75109e-24	23.7567	325	5369	184	18964	ENSG00000187730,ENSG00000069424,ENSG00000162494,ENSG00000186510,ENSG00000090020,ENSG00000163873,ENSG00000117013,ENSG00000142959,ENSG00000197147,ENSG00000118733,ENSG00000121940,ENSG00000181754,ENSG00000116396,ENSG00000177301,ENSG00000177272,ENSG00000171385,ENSG00000163399,ENSG00000160716,ENSG00000198929,ENSG00000143153,ENSG00000198216,ENSG00000143473,ENSG00000082482,ENSG00000143786,ENSG00000135750…
GO:CC	intracellular anatomical structure	GO:0005622	3.16078e-24	23.5002	14808	5369	4461	18964	ENSG00000188976,ENSG00000176022,ENSG00000107404,ENSG00000160075,ENSG00000189339,ENSG00000078369,ENSG00000169885,ENSG00000067606,ENSG00000157933,ENSG00000157881,ENSG00000197921,ENSG00000157870,ENSG00000158109,ENSG00000169598,ENSG00000198912,ENSG00000131697,ENSG00000069424,ENSG00000116254,ENSG00000158286,ENSG00000116237,ENSG00000097021,ENSG00000187017,ENSG00000215788,ENSG00000171680,ENSG00000162408…
136928	ENSG00000119508	ENSG00000136874	ENSG00000119509	ENSG00000148123	ENSG00000136881	ENSG00000136872	ENSG00000165152	ENSG00000155827	ENSG00000198785	ENSG00000136824	ENSG00000165028	ENSG00000186051	ENSG00000119318	ENSG00000119328	ENSG00000095203	ENSG00000070159	ENSG00000136813	ENSG00000059769	ENSG00000242616	ENSG00000148154	ENSG00000148153	ENSG00000136866	ENSG00000119411	ENSG00000157657	ENSG00000136883	ENSG00000196739	ENSG00000136888	ENSG00000148219	ENSG00000119401	ENSG00000078725	ENSG00000119402	ENSG00000119396	ENSG00000136848	ENSG00000106852	ENSG00000119446	ENSG00000056586	ENSG00000011454	ENSG00000165209	ENSG00000119522	ENSG00000106689	ENSG00000173611	ENSG00000044574	ENSG00000119487	ENSG00000167081	ENSG00000136828	ENSG00000136895	ENSG00000136854	ENSG00000095370	ENSG00000160408
GO:CC	intrinsic component of synaptic membrane	GO:0099240	5.97342e-24	23.2238	166	5369	113	18964	ENSG00000187730,ENSG00000171603,ENSG00000133216,ENSG00000116329,ENSG00000117114,ENSG00000117600,ENSG00000162631,ENSG00000177301,ENSG00000177272,ENSG00000171385,ENSG00000134207,ENSG00000160716,ENSG00000132718,ENSG00000058668,ENSG00000143473,ENSG00000183023,ENSG00000179915,ENSG00000176204,ENSG00000162951,ENSG00000162989,ENSG00000136531,ENSG00000114948,ENSG00000178568,ENSG00000116106,ENSG00000134115…
GO:CC	postsynaptic specialization membrane	GO:0099634	1.00724e-23	22.9969	120	5369	90	18964	ENSG00000171603,ENSG00000116329,ENSG00000117600,ENSG00000171385,ENSG00000160716,ENSG00000143473,ENSG00000077522,ENSG00000176204,ENSG00000162951,ENSG00000178568,ENSG00000116106,ENSG00000157087,ENSG00000158258,ENSG00000121871,ENSG00000169760,ENSG00000184160,ENSG00000109158,ENSG00000152208,ENSG00000120251,ENSG00000040731,ENSG00000186479,ENSG00000146006,ENSG00000155511,ENSG00000145864,ENSG00000022355…
GO:CC	transporter complex	GO:1990351	7.82267e-23	22.1066	340	5369	187	18964	ENSG00000187730,ENSG00000069424,ENSG00000142655,ENSG00000162494,ENSG00000186510,ENSG00000090020,ENSG00000163873,ENSG00000117013,ENSG00000142959,ENSG00000197147,ENSG00000118733,ENSG00000121940,ENSG00000181754,ENSG00000116396,ENSG00000177301,ENSG00000177272,ENSG00000171385,ENSG00000163399,ENSG00000160716,ENSG00000198929,ENSG00000143153,ENSG00000198216,ENSG00000143473,ENSG00000082482,ENSG00000143786…
GO:CC	cytoplasm	GO:0005737	2.69302e-22	21.5698	11951	5369	3688	18964	ENSG00000188976,ENSG00000176022,ENSG00000107404,ENSG00000160075,ENSG00000189339,ENSG00000078369,ENSG00000169885,ENSG00000067606,ENSG00000157933,ENSG00000157881,ENSG00000157870,ENSG00000158109,ENSG00000169598,ENSG00000131697,ENSG00000069424,ENSG00000116254,ENSG00000158286,ENSG00000116237,ENSG00000097021,ENSG00000187017,ENSG00000215788,ENSG00000171680,ENSG00000007923,ENSG00000171735,ENSG00000188807…
168067	ENSG00000068971	ENSG00000146670	ENSG00000149823	ENSG00000014216	ENSG00000162241	ENSG00000142186	ENSG00000172803	ENSG00000175229	ENSG00000175115	ENSG00000174996	ENSG00000174871	ENSG00000174684	ENSG00000174516	ENSG00000254986	ENSG00000174165	ENSG00000174080	ENSG00000173898	ENSG00000173227	ENSG00000173020	ENSG00000172932	ENSG00000172531	ENSG00000175463	ENSG00000110697	ENSG00000132744	ENSG00000069482	ENSG00000132749	ENSG00000132740	ENSG00000162341	ENSG00000131620	ENSG00000162105	ENSG00000244411	ENSG00000241233	ENSG00000254997	ENSG00000137522	ENSG00000186642	ENSG00000110237	ENSG00000175582	ENSG00000149380	ENSG00000165434	ENSG00000077514	ENSG00000054938	ENSG00000166435	ENSG00000162139	ENSG00000158555	ENSG00000171533	ENSG00000062282	ENSG00000085741	ENSG00000149260	ENSG00000149269
GO:CC	integral component of synaptic membrane	GO:0099699	3.17872e-22	21.4977	152	5369	104	18964	ENSG00000187730,ENSG00000171603,ENSG00000133216,ENSG00000116329,ENSG00000117114,ENSG00000117600,ENSG00000177301,ENSG00000177272,ENSG00000171385,ENSG00000134207,ENSG00000160716,ENSG00000132718,ENSG00000058668,ENSG00000143473,ENSG00000183023,ENSG00000179915,ENSG00000176204,ENSG00000162951,ENSG00000162989,ENSG00000136531,ENSG00000114948,ENSG00000178568,ENSG00000116106,ENSG00000157103,ENSG00000114646…
GO:CC	postsynaptic density membrane	GO:0098839	1.11871e-19	18.9513	94	5369	72	18964	ENSG00000171603,ENSG00000116329,ENSG00000117600,ENSG00000143473,ENSG00000077522,ENSG00000176204,ENSG00000178568,ENSG00000116106,ENSG00000157087,ENSG00000158258,ENSG00000121871,ENSG00000184160,ENSG00000152208,ENSG00000120251,ENSG00000186479,ENSG00000146006,ENSG00000155511,ENSG00000204314,ENSG00000156564,ENSG00000135333,ENSG00000152822,ENSG00000164742,ENSG00000008277,ENSG00000128594,ENSG00000157680…
GO:CC	intrinsic component of postsynaptic membrane	GO:0098936	1.45898e-19	18.836	124	5369	87	18964	ENSG00000187730,ENSG00000171603,ENSG00000133216,ENSG00000116329,ENSG00000117114,ENSG00000117600,ENSG00000177272,ENSG00000171385,ENSG00000160716,ENSG00000183023,ENSG00000176204,ENSG00000162951,ENSG00000178568,ENSG00000116106,ENSG00000157103,ENSG00000114646,ENSG00000164082,ENSG00000158258,ENSG00000121871,ENSG00000169760,ENSG00000184160,ENSG00000109158,ENSG00000152208,ENSG00000040731,ENSG00000186479…
GO:CC	integral component of postsynaptic membrane	GO:0099055	1.62218e-19	18.7899	118	5369	84	18964	ENSG00000187730,ENSG00000171603,ENSG00000133216,ENSG00000116329,ENSG00000117114,ENSG00000117600,ENSG00000177272,ENSG00000171385,ENSG00000160716,ENSG00000183023,ENSG00000176204,ENSG00000162951,ENSG00000178568,ENSG00000116106,ENSG00000157103,ENSG00000114646,ENSG00000164082,ENSG00000158258,ENSG00000121871,ENSG00000169760,ENSG00000184160,ENSG00000109158,ENSG00000152208,ENSG00000040731,ENSG00000146006…
GO:CC	synaptic vesicle membrane	GO:0030672	1.6904e-19	18.772	112	5369	81	18964	ENSG00000158109,ENSG00000116329,ENSG00000169213,ENSG00000197106,ENSG00000134207,ENSG00000159164,ENSG00000117533,ENSG00000135823,ENSG00000143858,ENSG00000143740,ENSG00000168118,ENSG00000115155,ENSG00000115194,ENSG00000152128,ENSG00000157152,ENSG00000164061,ENSG00000163630,ENSG00000145335,ENSG00000164038,ENSG00000109572,ENSG00000152932,ENSG00000122012,ENSG00000085365,ENSG00000175471,ENSG00000155511…
GO:CC	exocytic vesicle membrane	GO:0099501	1.6904e-19	18.772	112	5369	81	18964	ENSG00000158109,ENSG00000116329,ENSG00000169213,ENSG00000197106,ENSG00000134207,ENSG00000159164,ENSG00000117533,ENSG00000135823,ENSG00000143858,ENSG00000143740,ENSG00000168118,ENSG00000115155,ENSG00000115194,ENSG00000152128,ENSG00000157152,ENSG00000164061,ENSG00000163630,ENSG00000145335,ENSG00000164038,ENSG00000109572,ENSG00000152932,ENSG00000122012,ENSG00000085365,ENSG00000175471,ENSG00000155511…
GO:CC	synaptic vesicle	GO:0008021	2.75495e-19	18.5599	208	5369	125	18964	ENSG00000158109,ENSG00000116329,ENSG00000169213,ENSG00000197106,ENSG00000134207,ENSG00000134259,ENSG00000265808,ENSG00000159164,ENSG00000136631,ENSG00000132718,ENSG00000117533,ENSG00000135823,ENSG00000143858,ENSG00000143740,ENSG00000168118,ENSG00000115155,ENSG00000115194,ENSG00000152128,ENSG00000130294,ENSG00000157152,ENSG00000144711,ENSG00000164061,ENSG00000163630,ENSG00000178750,ENSG00000196549…
GO:CC	presynaptic membrane	GO:0042734	3.03976e-19	18.5172	148	5369	98	18964	ENSG00000133216,ENSG00000116329,ENSG00000163873,ENSG00000117016,ENSG00000162631,ENSG00000177301,ENSG00000177272,ENSG00000160716,ENSG00000132718,ENSG00000058668,ENSG00000143473,ENSG00000115155,ENSG00000179915,ENSG00000162989,ENSG00000136531,ENSG00000114948,ENSG00000178568,ENSG00000116106,ENSG00000134115,ENSG00000157103,ENSG00000168036,ENSG00000164082,ENSG00000187672,ENSG00000178750,ENSG00000174013…
GO:CC	exocytic vesicle	GO:0070382	6.09422e-19	18.2151	228	5369	133	18964	ENSG00000158109,ENSG00000116329,ENSG00000169213,ENSG00000197106,ENSG00000134207,ENSG00000134259,ENSG00000265808,ENSG00000159164,ENSG00000136631,ENSG00000132718,ENSG00000117533,ENSG00000135823,ENSG00000143858,ENSG00000143740,ENSG00000168118,ENSG00000115155,ENSG00000115194,ENSG00000152128,ENSG00000130294,ENSG00000157152,ENSG00000144711,ENSG00000164061,ENSG00000163630,ENSG00000178750,ENSG00000196549…
GO:CC	plasma membrane region	GO:0098590	2.14513e-18	17.6685	1240	5369	499	18964	ENSG00000205090,ENSG00000078369,ENSG00000187730,ENSG00000067606,ENSG00000196581,ENSG00000171603,ENSG00000117245,ENSG00000133216,ENSG00000090020,ENSG00000116329,ENSG00000159023,ENSG00000121905,ENSG00000116885,ENSG00000163873,ENSG00000117016,ENSG00000117013,ENSG00000187048,ENSG00000085832,ENSG00000157193,ENSG00000132849,ENSG00000203965,ENSG00000118473,ENSG00000117114,ENSG00000117600,ENSG00000162631…
GO:CC	neuron projection terminus	GO:0044306	3.91628e-17	16.4071	146	5369	94	18964	ENSG00000158109,ENSG00000125944,ENSG00000204178,ENSG00000116329,ENSG00000163873,ENSG00000177301,ENSG00000177272,ENSG00000143630,ENSG00000132718,ENSG00000082482,ENSG00000183023,ENSG00000115977,ENSG00000115041,ENSG00000144290,ENSG00000128683,ENSG00000054356,ENSG00000116106,ENSG00000187094,ENSG00000164061,ENSG00000196549,ENSG00000168993,ENSG00000184160,ENSG00000154277,ENSG00000145335,ENSG00000164099…
GO:CC	site of polarized growth	GO:0030427	1.41092e-16	15.8505	191	5369	113	18964	ENSG00000107404,ENSG00000125944,ENSG00000162374,ENSG00000122218,ENSG00000116852,ENSG00000143801,ENSG00000116903,ENSG00000179915,ENSG00000162951,ENSG00000168280,ENSG00000170396,ENSG00000003393,ENSG00000078018,ENSG00000171450,ENSG00000116106,ENSG00000066248,ENSG00000163539,ENSG00000182606,ENSG00000247596,ENSG00000187672,ENSG00000172020,ENSG00000072832,ENSG00000145335,ENSG00000182168,ENSG00000150625…
GO:CC	integral component of postsynaptic specialization membrane	GO:0099060	1.7812e-16	15.7493	74	5369	58	18964	ENSG00000171603,ENSG00000116329,ENSG00000117600,ENSG00000171385,ENSG00000160716,ENSG00000176204,ENSG00000162951,ENSG00000178568,ENSG00000158258,ENSG00000121871,ENSG00000169760,ENSG00000184160,ENSG00000109158,ENSG00000152208,ENSG00000040731,ENSG00000146006,ENSG00000155511,ENSG00000145864,ENSG00000022355,ENSG00000156564,ENSG00000135333,ENSG00000164742,ENSG00000008277,ENSG00000184408,ENSG00000128594…
GO:CC	intrinsic component of postsynaptic specialization membrane	GO:0098948	2.32348e-16	15.6339	78	5369	60	18964	ENSG00000171603,ENSG00000116329,ENSG00000117600,ENSG00000171385,ENSG00000160716,ENSG00000176204,ENSG00000162951,ENSG00000178568,ENSG00000158258,ENSG00000121871,ENSG00000169760,ENSG00000184160,ENSG00000109158,ENSG00000152208,ENSG00000040731,ENSG00000186479,ENSG00000146006,ENSG00000155511,ENSG00000145864,ENSG00000022355,ENSG00000156564,ENSG00000135333,ENSG00000164742,ENSG00000008277,ENSG00000184408…
GO:CC	potassium channel complex	GO:0034705	3.2605e-16	15.4867	100	5369	71	18964	ENSG00000069424,ENSG00000162494,ENSG00000163873,ENSG00000117013,ENSG00000181754,ENSG00000116396,ENSG00000177301,ENSG00000177272,ENSG00000171385,ENSG00000198929,ENSG00000143473,ENSG00000082482,ENSG00000135750,ENSG00000162975,ENSG00000170745,ENSG00000115041,ENSG00000175497,ENSG00000162989,ENSG00000169282,ENSG00000197584,ENSG00000185774,ENSG00000164588,ENSG00000182132,ENSG00000185760,ENSG00000164418…
GO:CC	growth cone	GO:0030426	9.18956e-16	15.0367	185	5369	109	18964	ENSG00000107404,ENSG00000125944,ENSG00000162374,ENSG00000122218,ENSG00000116852,ENSG00000143801,ENSG00000116903,ENSG00000179915,ENSG00000162951,ENSG00000168280,ENSG00000170396,ENSG00000003393,ENSG00000078018,ENSG00000171450,ENSG00000116106,ENSG00000066248,ENSG00000163539,ENSG00000182606,ENSG00000247596,ENSG00000187672,ENSG00000172020,ENSG00000072832,ENSG00000145335,ENSG00000182168,ENSG00000150625…
GO:CC	axon terminus	GO:0043679	1.31275e-14	13.8818	128	5369	82	18964	ENSG00000158109,ENSG00000125944,ENSG00000116329,ENSG00000163873,ENSG00000177301,ENSG00000177272,ENSG00000143630,ENSG00000132718,ENSG00000082482,ENSG00000183023,ENSG00000115977,ENSG00000115041,ENSG00000144290,ENSG00000128683,ENSG00000054356,ENSG00000116106,ENSG00000187094,ENSG00000168993,ENSG00000184160,ENSG00000145335,ENSG00000164099,ENSG00000109572,ENSG00000145708,ENSG00000145920,ENSG00000074317…
GO:CC	voltage-gated potassium channel complex	GO:0008076	1.48192e-14	13.8292	90	5369	64	18964	ENSG00000069424,ENSG00000162494,ENSG00000117013,ENSG00000181754,ENSG00000116396,ENSG00000177301,ENSG00000177272,ENSG00000171385,ENSG00000198929,ENSG00000143473,ENSG00000082482,ENSG00000135750,ENSG00000162975,ENSG00000170745,ENSG00000115041,ENSG00000175497,ENSG00000162989,ENSG00000169282,ENSG00000197584,ENSG00000185774,ENSG00000164588,ENSG00000182132,ENSG00000185760,ENSG00000106089,ENSG00000184408…
GO:CC	transport vesicle membrane	GO:0030658	2.09279e-14	13.6793	210	5369	117	18964	ENSG00000158109,ENSG00000116329,ENSG00000169213,ENSG00000197106,ENSG00000134207,ENSG00000265808,ENSG00000159164,ENSG00000117533,ENSG00000120341,ENSG00000135823,ENSG00000143858,ENSG00000117153,ENSG00000143786,ENSG00000143740,ENSG00000168118,ENSG00000115155,ENSG00000115194,ENSG00000180398,ENSG00000198369,ENSG00000135631,ENSG00000152128,ENSG00000054356,ENSG00000150995,ENSG00000157152,ENSG00000164061…
GO:CC	integral component of postsynaptic density membrane	GO:0099061	4.15522e-14	13.3814	51	5369	43	18964	ENSG00000171603,ENSG00000116329,ENSG00000117600,ENSG00000176204,ENSG00000178568,ENSG00000158258,ENSG00000121871,ENSG00000184160,ENSG00000152208,ENSG00000146006,ENSG00000155511,ENSG00000156564,ENSG00000135333,ENSG00000164742,ENSG00000008277,ENSG00000128594,ENSG00000157168,ENSG00000198739,ENSG00000156395,ENSG00000148948,ENSG00000168539,ENSG00000174871,ENSG00000139182,ENSG00000151490,ENSG00000178235…
GO:CC	transport vesicle	GO:0030133	5.6219e-14	13.2501	416	5369	196	18964	ENSG00000158109,ENSG00000159363,ENSG00000116329,ENSG00000169213,ENSG00000197106,ENSG00000134207,ENSG00000134259,ENSG00000265808,ENSG00000159164,ENSG00000136631,ENSG00000132718,ENSG00000122218,ENSG00000117533,ENSG00000120341,ENSG00000135823,ENSG00000143858,ENSG00000117153,ENSG00000196352,ENSG00000143786,ENSG00000143740,ENSG00000168118,ENSG00000162852,ENSG00000115155,ENSG00000115194,ENSG00000180398…
GO:CC	intrinsic component of postsynaptic density membrane	GO:0099146	7.92934e-14	13.1008	55	5369	45	18964	ENSG00000171603,ENSG00000116329,ENSG00000117600,ENSG00000176204,ENSG00000178568,ENSG00000158258,ENSG00000121871,ENSG00000184160,ENSG00000152208,ENSG00000186479,ENSG00000146006,ENSG00000155511,ENSG00000156564,ENSG00000135333,ENSG00000164742,ENSG00000008277,ENSG00000128594,ENSG00000157168,ENSG00000198739,ENSG00000156395,ENSG00000148948,ENSG00000168539,ENSG00000174871,ENSG00000139182,ENSG00000151490…
GO:CC	perikaryon	GO:0043204	2.50453e-13	12.6013	160	5369	94	18964	ENSG00000175206,ENSG00000121905,ENSG00000020129,ENSG00000163873,ENSG00000162374,ENSG00000181754,ENSG00000177301,ENSG00000132718,ENSG00000152092,ENSG00000135824,ENSG00000143473,ENSG00000135750,ENSG00000135622,ENSG00000144290,ENSG00000054356,ENSG00000116106,ENSG00000187094,ENSG00000172020,ENSG00000174953,ENSG00000169282,ENSG00000163536,ENSG00000168993,ENSG00000072832,ENSG00000145451,ENSG00000131711…
GO:CC	neuron spine	GO:0044309	3.4061e-12	11.4677	189	5369	104	18964	ENSG00000107404,ENSG00000171603,ENSG00000116661,ENSG00000116329,ENSG00000121905,ENSG00000171385,ENSG00000132718,ENSG00000197959,ENSG00000077522,ENSG00000183023,ENSG00000170396,ENSG00000003393,ENSG00000138443,ENSG00000116106,ENSG00000169760,ENSG00000138758,ENSG00000152208,ENSG00000138814,ENSG00000120251,ENSG00000150625,ENSG00000131711,ENSG00000152413,ENSG00000080709,ENSG00000070808,ENSG00000171992…
GO:CC	dendritic spine	GO:0043197	8.27396e-12	11.0823	186	5369	102	18964	ENSG00000107404,ENSG00000171603,ENSG00000116661,ENSG00000116329,ENSG00000121905,ENSG00000171385,ENSG00000132718,ENSG00000197959,ENSG00000077522,ENSG00000183023,ENSG00000170396,ENSG00000003393,ENSG00000138443,ENSG00000116106,ENSG00000169760,ENSG00000138758,ENSG00000152208,ENSG00000138814,ENSG00000120251,ENSG00000150625,ENSG00000131711,ENSG00000152413,ENSG00000080709,ENSG00000070808,ENSG00000171992…
GO:CC	GABA-ergic synapse	GO:0098982	1.17455e-11	10.9301	73	5369	52	18964	ENSG00000187730,ENSG00000171603,ENSG00000197106,ENSG00000171385,ENSG00000159164,ENSG00000179915,ENSG00000162951,ENSG00000178568,ENSG00000157087,ENSG00000157103,ENSG00000114646,ENSG00000164061,ENSG00000187672,ENSG00000172020,ENSG00000121871,ENSG00000159692,ENSG00000109158,ENSG00000138758,ENSG00000164116,ENSG00000109738,ENSG00000109572,ENSG00000040731,ENSG00000146006,ENSG00000145864,ENSG00000022355…
GO:CC	intracellular membrane-bounded organelle	GO:0043231	2.90832e-11	10.5364	12046	5369	3630	18964	ENSG00000188976,ENSG00000176022,ENSG00000107404,ENSG00000160075,ENSG00000189339,ENSG00000078369,ENSG00000169885,ENSG00000067606,ENSG00000157933,ENSG00000157881,ENSG00000197921,ENSG00000157870,ENSG00000158109,ENSG00000169598,ENSG00000198912,ENSG00000131697,ENSG00000069424,ENSG00000116254,ENSG00000116237,ENSG00000097021,ENSG00000171680,ENSG00000162408,ENSG00000116273,ENSG00000007923,ENSG00000171735…
172375	ENSG00000172273	ENSG00000172350	ENSG00000173456	ENSG00000036672	ENSG00000154096	ENSG00000109929	ENSG00000137642	ENSG00000154127	ENSG00000109971	ENSG00000023171	ENSG00000110013	ENSG00000154146	ENSG00000165495	ENSG00000134910	ENSG00000134940	ENSG00000198331	ENSG00000109832	ENSG00000165526	ENSG00000182934	ENSG00000110074	ENSG00000150455	ENSG00000149571	ENSG00000120471	ENSG00000134909	ENSG00000170325	ENSG00000084234	ENSG00000151502	ENSG00000151500	ENSG00000151498	ENSG00000166105	ENSG00000149328	ENSG00000109956	ENSG00000120645	ENSG00000082805	ENSG00000111186	ENSG00000004478	ENSG00000111203	ENSG00000053702	ENSG00000171792	ENSG00000111224	ENSG00000118971	ENSG00000078237	ENSG00000111247	ENSG00000139180	ENSG00000130035	ENSG00000111262	ENSG00000130037	ENSG00000139190	ENSG00000010295
GO:CC	presynaptic active zone	GO:0048786	6.32834e-11	10.1987	77	5369	53	18964	ENSG00000158109,ENSG00000117016,ENSG00000162631,ENSG00000159164,ENSG00000132718,ENSG00000143847,ENSG00000058668,ENSG00000115155,ENSG00000179915,ENSG00000128683,ENSG00000196277,ENSG00000168036,ENSG00000164061,ENSG00000187672,ENSG00000178750,ENSG00000159692,ENSG00000061918,ENSG00000150625,ENSG00000040731,ENSG00000079841,ENSG00000106089,ENSG00000186472,ENSG00000157680,ENSG00000104290,ENSG00000157168…
GO:CC	bounding membrane of organelle	GO:0098588	1.09258e-10	9.96155	2165	5369	758	18964	ENSG00000176022,ENSG00000078369,ENSG00000158109,ENSG00000069424,ENSG00000007923,ENSG00000171603,ENSG00000142655,ENSG00000198793,ENSG00000120942,ENSG00000011021,ENSG00000116786,ENSG00000159363,ENSG00000090432,ENSG00000076864,ENSG00000162552,ENSG00000070886,ENSG00000204178,ENSG00000117643,ENSG00000204160,ENSG00000116329,ENSG00000160097,ENSG00000142687,ENSG00000020129,ENSG00000185090,ENSG00000116954…
GO:CC	organelle	GO:0043226	1.35251e-10	9.86886	14027	5369	4165	18964	ENSG00000188976,ENSG00000176022,ENSG00000107404,ENSG00000160075,ENSG00000189339,ENSG00000078369,ENSG00000169885,ENSG00000067606,ENSG00000157933,ENSG00000157881,ENSG00000197921,ENSG00000157870,ENSG00000158109,ENSG00000169598,ENSG00000198912,ENSG00000131697,ENSG00000069424,ENSG00000116254,ENSG00000116237,ENSG00000097021,ENSG00000187017,ENSG00000171680,ENSG00000162408,ENSG00000116273,ENSG00000007923…
198739	ENSG00000179774	ENSG00000122912	ENSG00000165732	ENSG00000198954	ENSG00000156515	ENSG00000075073	ENSG00000171224	ENSG00000197467	ENSG00000042286	ENSG00000107745	ENSG00000156026	ENSG00000122882	ENSG00000213551	ENSG00000182180	ENSG00000107758	ENSG00000148660	ENSG00000185009	ENSG00000165655	ENSG00000148606	ENSG00000253626	ENSG00000185303	ENSG00000133661	ENSG00000122359	ENSG00000148600	ENSG00000107771	ENSG00000173267	ENSG00000227268	ENSG00000138134	ENSG00000152782	ENSG00000138182	ENSG00000148680	ENSG00000107864	ENSG00000138160	ENSG00000095596	ENSG00000138207	ENSG00000176273	ENSG00000138115	ENSG00000165879	ENSG00000052749	ENSG00000171311	ENSG00000155229	ENSG00000165887	ENSG00000171160	ENSG00000155252	ENSG00000155256	ENSG00000155265	ENSG00000095713	ENSG00000119946	ENSG00000120053
GO:CC	endomembrane system	GO:0012505	1.91532e-10	9.71776	4651	5369	1509	18964	ENSG00000176022,ENSG00000189339,ENSG00000067606,ENSG00000157870,ENSG00000158109,ENSG00000069424,ENSG00000116237,ENSG00000188807,ENSG00000171603,ENSG00000198793,ENSG00000120942,ENSG00000204624,ENSG00000116661,ENSG00000011021,ENSG00000116731,ENSG00000116786,ENSG00000159363,ENSG00000076864,ENSG00000162552,ENSG00000070886,ENSG00000125944,ENSG00000179163,ENSG00000204178,ENSG00000117643,ENSG00000158008…
GO:CC	cytosol	GO:0005829	2.247e-10	9.6484	5361	5369	1718	18964	ENSG00000188976,ENSG00000107404,ENSG00000160075,ENSG00000078369,ENSG00000067606,ENSG00000157881,ENSG00000157870,ENSG00000169598,ENSG00000131697,ENSG00000069424,ENSG00000116254,ENSG00000097021,ENSG00000215788,ENSG00000171680,ENSG00000171735,ENSG00000175279,ENSG00000142655,ENSG00000198793,ENSG00000116661,ENSG00000132879,ENSG00000177000,ENSG00000189337,ENSG00000197312,ENSG00000169914,ENSG00000117245…
GO:CC	Schaffer collateral - CA1 synapse	GO:0098685	5.36334e-10	9.27057	84	5369	55	18964	ENSG00000107404,ENSG00000067606,ENSG00000162631,ENSG00000132718,ENSG00000179915,ENSG00000221823,ENSG00000116106,ENSG00000150995,ENSG00000157152,ENSG00000168036,ENSG00000164061,ENSG00000163558,ENSG00000168993,ENSG00000138814,ENSG00000146006,ENSG00000047579,ENSG00000204681,ENSG00000156564,ENSG00000135333,ENSG00000152822,ENSG00000164506,ENSG00000188191,ENSG00000011275,ENSG00000136267,ENSG00000164742…
GO:CC	intracellular organelle	GO:0043229	4.4407e-09	8.35255	13117	5369	3904	18964	ENSG00000188976,ENSG00000176022,ENSG00000107404,ENSG00000160075,ENSG00000189339,ENSG00000078369,ENSG00000169885,ENSG00000067606,ENSG00000157933,ENSG00000157881,ENSG00000197921,ENSG00000157870,ENSG00000158109,ENSG00000169598,ENSG00000198912,ENSG00000131697,ENSG00000069424,ENSG00000116254,ENSG00000116237,ENSG00000097021,ENSG00000187017,ENSG00000171680,ENSG00000162408,ENSG00000116273,ENSG00000007923…
166313	ENSG00000110169	ENSG00000110171	ENSG00000132254	ENSG00000132286	ENSG00000149054	ENSG00000166402	ENSG00000166405	ENSG00000166407	ENSG00000166436	ENSG00000205339	ENSG00000198730	ENSG00000110328	ENSG00000254598	ENSG00000170242	ENSG00000133816	ENSG00000133794	ENSG00000148925	ENSG00000129083	ENSG00000110680	ENSG00000187486	ENSG00000006071	ENSG00000129158	ENSG00000166796	ENSG00000179119	ENSG00000110786	ENSG00000177054	ENSG00000165973	ENSG00000171714	ENSG00000183161	ENSG00000198168	ENSG00000169519	ENSG00000152219	ENSG00000170946	ENSG00000049449	ENSG00000176148	ENSG00000176102	ENSG00000110429	ENSG00000135387	ENSG00000110435	ENSG00000166181	ENSG00000149084	ENSG00000019485	ENSG00000019505	ENSG00000181830	ENSG00000121671	ENSG00000121653	ENSG00000149091	ENSG00000110497	ENSG00000175224
GO:CC	Golgi apparatus	GO:0005794	5.78971e-09	8.23734	1593	5369	568	18964	ENSG00000176022,ENSG00000189339,ENSG00000171603,ENSG00000198793,ENSG00000120942,ENSG00000116731,ENSG00000076864,ENSG00000162552,ENSG00000117643,ENSG00000158008,ENSG00000204160,ENSG00000142687,ENSG00000185090,ENSG00000117400,ENSG00000126091,ENSG00000186094,ENSG00000162373,ENSG00000169213,ENSG00000116209,ENSG00000116133,ENSG00000162409,ENSG00000117069,ENSG00000118733,ENSG00000121940,ENSG00000116299…
GO:CC	organelle membrane	GO:0031090	5.95556e-09	8.22508	3644	5369	1196	18964	ENSG00000176022,ENSG00000078369,ENSG00000158109,ENSG00000069424,ENSG00000116237,ENSG00000007923,ENSG00000188807,ENSG00000171603,ENSG00000142655,ENSG00000198793,ENSG00000120942,ENSG00000204624,ENSG00000011021,ENSG00000116786,ENSG00000233954,ENSG00000159363,ENSG00000090432,ENSG00000076864,ENSG00000162552,ENSG00000070886,ENSG00000204178,ENSG00000117643,ENSG00000158008,ENSG00000117682,ENSG00000204160…
GO:CC	intrinsic component of presynaptic membrane	GO:0098889	7.68731e-09	8.11423	79	5369	51	18964	ENSG00000133216,ENSG00000116329,ENSG00000162631,ENSG00000177301,ENSG00000177272,ENSG00000160716,ENSG00000132718,ENSG00000058668,ENSG00000143473,ENSG00000179915,ENSG00000162989,ENSG00000136531,ENSG00000114948,ENSG00000178568,ENSG00000116106,ENSG00000134115,ENSG00000157103,ENSG00000150625,ENSG00000040731,ENSG00000186479,ENSG00000135312,ENSG00000118432,ENSG00000106089,ENSG00000181072,ENSG00000157168…
GO:CC	ionotropic glutamate receptor complex	GO:0008328	2.43388e-08	7.6137	47	5369	35	18964	ENSG00000163873,ENSG00000118733,ENSG00000143786,ENSG00000174453,ENSG00000169760,ENSG00000152208,ENSG00000120251,ENSG00000155511,ENSG00000164418,ENSG00000188730,ENSG00000120899,ENSG00000198785,ENSG00000176884,ENSG00000174871,ENSG00000162105,ENSG00000150672,ENSG00000152578,ENSG00000149403,ENSG00000273079,ENSG00000183454,ENSG00000237515,ENSG00000006116,ENSG00000132535,ENSG00000075429,ENSG00000075461…
GO:CC	organelle subcompartment	GO:0031984	8.87327e-08	7.05192	1764	5369	614	18964	ENSG00000176022,ENSG00000116237,ENSG00000188807,ENSG00000171603,ENSG00000198793,ENSG00000120942,ENSG00000204624,ENSG00000076864,ENSG00000204178,ENSG00000117643,ENSG00000158008,ENSG00000117682,ENSG00000204160,ENSG00000090020,ENSG00000116514,ENSG00000142687,ENSG00000185090,ENSG00000126091,ENSG00000187048,ENSG00000186377,ENSG00000186160,ENSG00000116209,ENSG00000116133,ENSG00000117069,ENSG00000197147…
GO:CC	neurotransmitter receptor complex	GO:0098878	1.66232e-07	6.77928	49	5369	35	18964	ENSG00000163873,ENSG00000118733,ENSG00000143786,ENSG00000174453,ENSG00000169760,ENSG00000152208,ENSG00000120251,ENSG00000155511,ENSG00000164418,ENSG00000188730,ENSG00000120899,ENSG00000198785,ENSG00000176884,ENSG00000174871,ENSG00000162105,ENSG00000150672,ENSG00000152578,ENSG00000149403,ENSG00000273079,ENSG00000183454,ENSG00000237515,ENSG00000006116,ENSG00000132535,ENSG00000075429,ENSG00000075461…
GO:CC	excitatory synapse	GO:0060076	1.66232e-07	6.77928	49	5369	35	18964	ENSG00000132718,ENSG00000221823,ENSG00000162951,ENSG00000162989,ENSG00000134115,ENSG00000164061,ENSG00000169760,ENSG00000152208,ENSG00000120251,ENSG00000146006,ENSG00000155511,ENSG00000225968,ENSG00000128594,ENSG00000157680,ENSG00000176884,ENSG00000173898,ENSG00000067715,ENSG00000179841,ENSG00000137766,ENSG00000006116,ENSG00000102924,ENSG00000172137,ENSG00000132535,ENSG00000005884,ENSG00000175866…
GO:CC	Golgi apparatus subcompartment	GO:0098791	4.52362e-07	6.34451	845	5369	318	18964	ENSG00000176022,ENSG00000171603,ENSG00000198793,ENSG00000120942,ENSG00000076864,ENSG00000117643,ENSG00000204160,ENSG00000142687,ENSG00000185090,ENSG00000126091,ENSG00000116209,ENSG00000116133,ENSG00000117069,ENSG00000121940,ENSG00000116299,ENSG00000134262,ENSG00000198162,ENSG00000265808,ENSG00000136631,ENSG00000143457,ENSG00000177628,ENSG00000132718,ENSG00000122218,ENSG00000158850,ENSG00000118217…
GO:CC	intrinsic component of plasma membrane	GO:0031226	6.35501e-07	6.19688	1725	5369	596	18964	ENSG00000186891,ENSG00000187730,ENSG00000196581,ENSG00000069424,ENSG00000215788,ENSG00000171603,ENSG00000162494,ENSG00000186510,ENSG00000070886,ENSG00000133216,ENSG00000179546,ENSG00000090020,ENSG00000181773,ENSG00000116329,ENSG00000060656,ENSG00000121764,ENSG00000121753,ENSG00000163873,ENSG00000183317,ENSG00000117013,ENSG00000269113,ENSG00000180488,ENSG00000122420,ENSG00000117114,ENSG00000197147…
GO:CC	integral component of presynaptic membrane	GO:0099056	6.36543e-07	6.19617	70	5369	44	18964	ENSG00000133216,ENSG00000116329,ENSG00000177301,ENSG00000177272,ENSG00000160716,ENSG00000132718,ENSG00000058668,ENSG00000143473,ENSG00000179915,ENSG00000162989,ENSG00000136531,ENSG00000114948,ENSG00000178568,ENSG00000116106,ENSG00000157103,ENSG00000150625,ENSG00000040731,ENSG00000135312,ENSG00000118432,ENSG00000106089,ENSG00000181072,ENSG00000157168,ENSG00000082556,ENSG00000129159,ENSG00000011347…
GO:CC	membrane	GO:0016020	9.50582e-07	6.02201	9829	5369	2964	18964	ENSG00000186891,ENSG00000176022,ENSG00000107404,ENSG00000205090,ENSG00000228594,ENSG00000189339,ENSG00000078369,ENSG00000187730,ENSG00000067606,ENSG00000142606,ENSG00000158109,ENSG00000196581,ENSG00000069424,ENSG00000116254,ENSG00000116237,ENSG00000158292,ENSG00000215788,ENSG00000171680,ENSG00000162408,ENSG00000007923,ENSG00000162426,ENSG00000188807,ENSG00000171603,ENSG00000142655,ENSG00000198793…
168350	ENSG00000183092	ENSG00000185559	ENSG00000254656	ENSG00000080824	ENSG00000131323	ENSG00000166126	ENSG00000100664	ENSG00000166170	ENSG00000088808	ENSG00000258986	ENSG00000185567	ENSG00000184916	ENSG00000140157	ENSG00000254585	ENSG00000166206	ENSG00000186297	ENSG00000182256	ENSG00000034053	ENSG00000104059	ENSG00000261794	ENSG00000175344	ENSG00000248905	ENSG00000184984	ENSG00000140199	ENSG00000176454	ENSG00000159248	ENSG00000166068	ENSG00000172575	ENSG00000166073	ENSG00000140323	ENSG00000128944	ENSG00000137880	ENSG00000104140	ENSG00000104142	ENSG00000187446	ENSG00000062524	ENSG00000166887	ENSG00000103994	ENSG00000180979	ENSG00000137842	ENSG00000137822	ENSG00000168781	ENSG00000237289	ENSG00000223572	ENSG00000140263	ENSG00000140279	ENSG00000104154	ENSG00000233932	ENSG00000074803
GO:CC	Golgi membrane	GO:0000139	1.00054e-06	5.99976	725	5369	277	18964	ENSG00000176022,ENSG00000171603,ENSG00000198793,ENSG00000120942,ENSG00000076864,ENSG00000117643,ENSG00000204160,ENSG00000142687,ENSG00000185090,ENSG00000126091,ENSG00000116209,ENSG00000116133,ENSG00000117069,ENSG00000121940,ENSG00000134262,ENSG00000198162,ENSG00000265808,ENSG00000136631,ENSG00000143457,ENSG00000122218,ENSG00000158850,ENSG00000118217,ENSG00000117475,ENSG00000000457,ENSG00000117533…
GO:CC	intrinsic component of synaptic vesicle membrane	GO:0098563	1.0681e-06	5.97139	47	5369	33	18964	ENSG00000116329,ENSG00000169213,ENSG00000197106,ENSG00000159164,ENSG00000117533,ENSG00000135823,ENSG00000168118,ENSG00000115194,ENSG00000152128,ENSG00000163630,ENSG00000109572,ENSG00000152932,ENSG00000122012,ENSG00000213760,ENSG00000106089,ENSG00000155093,ENSG00000082556,ENSG00000139190,ENSG00000067715,ENSG00000111737,ENSG00000213578,ENSG00000167964,ENSG00000220205,ENSG00000132872,ENSG00000041353…
GO:CC	coated membrane	GO:0048475	1.49777e-06	5.82456	97	5369	55	18964	ENSG00000085832,ENSG00000118473,ENSG00000134262,ENSG00000122218,ENSG00000117153,ENSG00000152056,ENSG00000131374,ENSG00000113966,ENSG00000181789,ENSG00000161203,ENSG00000138674,ENSG00000151466,ENSG00000177879,ENSG00000113282,ENSG00000185760,ENSG00000242802,ENSG00000006715,ENSG00000221838,ENSG00000106367,ENSG00000158623,ENSG00000070718,ENSG00000104490,ENSG00000106976,ENSG00000185009,ENSG00000152782…
GO:CC	membrane coat	GO:0030117	1.49777e-06	5.82456	97	5369	55	18964	ENSG00000085832,ENSG00000118473,ENSG00000134262,ENSG00000122218,ENSG00000117153,ENSG00000152056,ENSG00000131374,ENSG00000113966,ENSG00000181789,ENSG00000161203,ENSG00000138674,ENSG00000151466,ENSG00000177879,ENSG00000113282,ENSG00000185760,ENSG00000242802,ENSG00000006715,ENSG00000221838,ENSG00000106367,ENSG00000158623,ENSG00000070718,ENSG00000104490,ENSG00000106976,ENSG00000185009,ENSG00000152782…
GO:CC	neuron projection cytoplasm	GO:0120111	2.2383e-06	5.65008	93	5369	53	18964	ENSG00000117245,ENSG00000121905,ENSG00000163873,ENSG00000186094,ENSG00000152332,ENSG00000021574,ENSG00000168280,ENSG00000078018,ENSG00000130294,ENSG00000182606,ENSG00000169282,ENSG00000198836,ENSG00000154277,ENSG00000137463,ENSG00000177879,ENSG00000131437,ENSG00000185129,ENSG00000072803,ENSG00000047579,ENSG00000164418,ENSG00000112290,ENSG00000277586,ENSG00000070718,ENSG00000147642,ENSG00000198576…
GO:CC	integral component of plasma membrane	GO:0005887	3.86565e-06	5.41278	1643	5369	565	18964	ENSG00000186891,ENSG00000187730,ENSG00000196581,ENSG00000069424,ENSG00000215788,ENSG00000171603,ENSG00000162494,ENSG00000186510,ENSG00000070886,ENSG00000133216,ENSG00000179546,ENSG00000090020,ENSG00000181773,ENSG00000116329,ENSG00000060656,ENSG00000121764,ENSG00000121753,ENSG00000163873,ENSG00000183317,ENSG00000117013,ENSG00000269113,ENSG00000180488,ENSG00000122420,ENSG00000117114,ENSG00000197147…
GO:CC	perinuclear region of cytoplasm	GO:0048471	1.26937e-05	4.89641	745	5369	278	18964	ENSG00000067606,ENSG00000158286,ENSG00000171680,ENSG00000175206,ENSG00000090020,ENSG00000126107,ENSG00000169213,ENSG00000173406,ENSG00000132849,ENSG00000142864,ENSG00000142875,ENSG00000134207,ENSG00000132718,ENSG00000160803,ENSG00000183853,ENSG00000215845,ENSG00000198929,ENSG00000143194,ENSG00000197959,ENSG00000135823,ENSG00000058085,ENSG00000143473,ENSG00000117724,ENSG00000143801,ENSG00000143740…
GO:CC	vesicle membrane	GO:0012506	1.72399e-05	4.76347	1183	5369	417	18964	ENSG00000158109,ENSG00000069424,ENSG00000204624,ENSG00000011021,ENSG00000116786,ENSG00000159363,ENSG00000162552,ENSG00000070886,ENSG00000116329,ENSG00000020129,ENSG00000116954,ENSG00000085832,ENSG00000169213,ENSG00000157077,ENSG00000116209,ENSG00000118473,ENSG00000116299,ENSG00000156097,ENSG00000197106,ENSG00000134207,ENSG00000265808,ENSG00000159164,ENSG00000136631,ENSG00000143376,ENSG00000132718…
GO:CC	membrane-bounded organelle	GO:0043227	1.79847e-05	4.7451	13201	5369	3889	18964	ENSG00000188976,ENSG00000176022,ENSG00000107404,ENSG00000160075,ENSG00000189339,ENSG00000078369,ENSG00000169885,ENSG00000067606,ENSG00000157933,ENSG00000157881,ENSG00000197921,ENSG00000157870,ENSG00000158109,ENSG00000169598,ENSG00000198912,ENSG00000131697,ENSG00000069424,ENSG00000116254,ENSG00000116237,ENSG00000097021,ENSG00000171680,ENSG00000162408,ENSG00000116273,ENSG00000007923,ENSG00000171735…
167325	ENSG00000166313	ENSG00000110169	ENSG00000110171	ENSG00000132254	ENSG00000132286	ENSG00000149054	ENSG00000166402	ENSG00000166405	ENSG00000166407	ENSG00000166436	ENSG00000205339	ENSG00000198730	ENSG00000110328	ENSG00000254598	ENSG00000170242	ENSG00000133816	ENSG00000133794	ENSG00000148925	ENSG00000129083	ENSG00000110680	ENSG00000187486	ENSG00000006071	ENSG00000129158	ENSG00000166796	ENSG00000179119	ENSG00000110786	ENSG00000177054	ENSG00000165973	ENSG00000171714	ENSG00000183161	ENSG00000198168	ENSG00000169519	ENSG00000152219	ENSG00000049449	ENSG00000176102	ENSG00000110429	ENSG00000110435	ENSG00000166181	ENSG00000149084	ENSG00000085117	ENSG00000019485	ENSG00000019505	ENSG00000181830	ENSG00000121671	ENSG00000121653	ENSG00000149091	ENSG00000110497	ENSG00000175224	ENSG00000175216
GO:CC	calcium channel complex	GO:0034704	1.90758e-05	4.71952	71	5369	42	18964	ENSG00000198929,ENSG00000198216,ENSG00000198626,ENSG00000119782,ENSG00000182389,ENSG00000007402,ENSG00000157388,ENSG00000157445,ENSG00000158683,ENSG00000153956,ENSG00000165125,ENSG00000155970,ENSG00000119383,ENSG00000148408,ENSG00000165995,ENSG00000107745,ENSG00000156026,ENSG00000219435,ENSG00000151067,ENSG00000167535,ENSG00000089250,ENSG00000151320,ENSG00000198668,ENSG00000196557,ENSG00000008710…
GO:CC	neuronal dense core vesicle	GO:0098992	2.6348e-05	4.57925	13	5369	13	18964	ENSG00000116329,ENSG00000171951,ENSG00000130294,ENSG00000163618,ENSG00000145087,ENSG00000164506,ENSG00000122585,ENSG00000181195,ENSG00000197969,ENSG00000100604,ENSG00000104093,ENSG00000132872,ENSG00000129990
GO:CC	neuron projection membrane	GO:0032589	4.75671e-05	4.32269	61	5369	37	18964	ENSG00000116329,ENSG00000121905,ENSG00000116396,ENSG00000143473,ENSG00000185008,ENSG00000109158,ENSG00000155511,ENSG00000145863,ENSG00000022355,ENSG00000113327,ENSG00000113763,ENSG00000111913,ENSG00000174469,ENSG00000029534,ENSG00000187486,ENSG00000129159,ENSG00000134780,ENSG00000154096,ENSG00000139112,ENSG00000181418,ENSG00000166006,ENSG00000070961,ENSG00000179841,ENSG00000186297,ENSG00000182256…
GO:CC	dendritic shaft	GO:0043198	5.05695e-05	4.29611	37	5369	26	18964	ENSG00000143786,ENSG00000143801,ENSG00000183023,ENSG00000170396,ENSG00000078018,ENSG00000116106,ENSG00000196277,ENSG00000169760,ENSG00000197283,ENSG00000005249,ENSG00000061337,ENSG00000106688,ENSG00000174871,ENSG00000149571,ENSG00000102468,ENSG00000092051,ENSG00000166963,ENSG00000063015,ENSG00000108852,ENSG00000073969,ENSG00000175866,ENSG00000101463,ENSG00000142192,ENSG00000040608,ENSG00000185133…
GO:CC	microtubule cytoskeleton	GO:0015630	5.97832e-05	4.22342	1313	5369	454	18964	ENSG00000107404,ENSG00000067606,ENSG00000157933,ENSG00000131697,ENSG00000069424,ENSG00000188807,ENSG00000132881,ENSG00000117245,ENSG00000127423,ENSG00000117632,ENSG00000198492,ENSG00000159023,ENSG00000116871,ENSG00000142945,ENSG00000086015,ENSG00000123473,ENSG00000186094,ENSG00000085831,ENSG00000157193,ENSG00000134709,ENSG00000132849,ENSG00000033122,ENSG00000154027,ENSG00000142875,ENSG00000117155…
GO:CC	microtubule	GO:0005874	0.000133405	3.87483	435	5369	171	18964	ENSG00000107404,ENSG00000069424,ENSG00000117245,ENSG00000117632,ENSG00000142945,ENSG00000134709,ENSG00000085433,ENSG00000178104,ENSG00000160753,ENSG00000163468,ENSG00000117477,ENSG00000075945,ENSG00000197959,ENSG00000118200,ENSG00000116852,ENSG00000154429,ENSG00000212916,ENSG00000184731,ENSG00000084731,ENSG00000084764,ENSG00000138100,ENSG00000021574,ENSG00000115841,ENSG00000183023,ENSG00000138036…
GO:CC	AMPA glutamate receptor complex	GO:0032281	0.000133637	3.87407	26	5369	20	18964	ENSG00000118733,ENSG00000143786,ENSG00000174453,ENSG00000120251,ENSG00000155511,ENSG00000188730,ENSG00000174871,ENSG00000152578,ENSG00000237515,ENSG00000006116,ENSG00000132535,ENSG00000075429,ENSG00000075461,ENSG00000169169,ENSG00000105605,ENSG00000142408,ENSG00000166862,ENSG00000102312,ENSG00000082458,ENSG00000125675
GO:CC	clathrin coat	GO:0030118	0.000150378	3.82282	47	5369	30	18964	ENSG00000085832,ENSG00000118473,ENSG00000134262,ENSG00000131374,ENSG00000161203,ENSG00000151466,ENSG00000113282,ENSG00000185760,ENSG00000006715,ENSG00000221838,ENSG00000106367,ENSG00000070718,ENSG00000104490,ENSG00000185009,ENSG00000152782,ENSG00000183020,ENSG00000089818,ENSG00000139719,ENSG00000213983,ENSG00000006125,ENSG00000049283,ENSG00000141367,ENSG00000072958,ENSG00000127527,ENSG00000196961…
GO:CC	cytoplasmic vesicle	GO:0031410	0.000223089	3.65152	2433	5369	791	18964	ENSG00000107404,ENSG00000067606,ENSG00000158109,ENSG00000069424,ENSG00000171680,ENSG00000171603,ENSG00000198793,ENSG00000204624,ENSG00000011021,ENSG00000116786,ENSG00000159363,ENSG00000076864,ENSG00000162552,ENSG00000070886,ENSG00000179163,ENSG00000116329,ENSG00000142687,ENSG00000020129,ENSG00000116954,ENSG00000131236,ENSG00000123091,ENSG00000085832,ENSG00000169213,ENSG00000157077,ENSG00000116209…
GO:CC	intracellular vesicle	GO:0097708	0.000317883	3.49773	2438	5369	791	18964	ENSG00000107404,ENSG00000067606,ENSG00000158109,ENSG00000069424,ENSG00000171680,ENSG00000171603,ENSG00000198793,ENSG00000204624,ENSG00000011021,ENSG00000116786,ENSG00000159363,ENSG00000076864,ENSG00000162552,ENSG00000070886,ENSG00000179163,ENSG00000116329,ENSG00000142687,ENSG00000020129,ENSG00000116954,ENSG00000131236,ENSG00000123091,ENSG00000085832,ENSG00000169213,ENSG00000157077,ENSG00000116209…
GO:CC	voltage-gated calcium channel complex	GO:0005891	0.000400229	3.39769	44	5369	28	18964	ENSG00000198929,ENSG00000198216,ENSG00000182389,ENSG00000007402,ENSG00000157388,ENSG00000157445,ENSG00000153956,ENSG00000148408,ENSG00000165995,ENSG00000219435,ENSG00000151067,ENSG00000167535,ENSG00000089250,ENSG00000196557,ENSG00000006116,ENSG00000067191,ENSG00000006283,ENSG00000075461,ENSG00000108878,ENSG00000141837,ENSG00000099338,ENSG00000196218,ENSG00000105605,ENSG00000142408,ENSG00000088832…
GO:CC	presynaptic active zone cytoplasmic component	GO:0098831	0.000484656	3.31457	16	5369	14	18964	ENSG00000117016,ENSG00000168036,ENSG00000164061,ENSG00000187672,ENSG00000159692,ENSG00000061918,ENSG00000079841,ENSG00000186472,ENSG00000176406,ENSG00000198722,ENSG00000082805,ENSG00000137766,ENSG00000130477,ENSG00000177380
GO:CC	calyx of Held	GO:0044305	0.000838883	3.0763	20	5369	16	18964	ENSG00000158109,ENSG00000177301,ENSG00000177272,ENSG00000082482,ENSG00000168993,ENSG00000145920,ENSG00000135312,ENSG00000104327,ENSG00000107130,ENSG00000129159,ENSG00000111262,ENSG00000137766,ENSG00000166501,ENSG00000108262,ENSG00000005379,ENSG00000126583
GO:CC	dendrite membrane	GO:0032590	0.000910548	3.0407	43	5369	27	18964	ENSG00000116329,ENSG00000121905,ENSG00000116396,ENSG00000109158,ENSG00000155511,ENSG00000145863,ENSG00000022355,ENSG00000113327,ENSG00000129159,ENSG00000134780,ENSG00000154096,ENSG00000139112,ENSG00000181418,ENSG00000166006,ENSG00000070961,ENSG00000179841,ENSG00000186297,ENSG00000182256,ENSG00000237515,ENSG00000108852,ENSG00000108819,ENSG00000099864,ENSG00000131398,ENSG00000125869,ENSG00000158445…
GO:CC	endoplasmic reticulum tubular network	GO:0071782	0.000997058	3.00128	26	5369	19	18964	ENSG00000188807,ENSG00000173409,ENSG00000021574,ENSG00000119787,ENSG00000115310,ENSG00000068615,ENSG00000115839,ENSG00000144320,ENSG00000213533,ENSG00000129625,ENSG00000132563,ENSG00000099246,ENSG00000155256,ENSG00000167323,ENSG00000172375,ENSG00000181852,ENSG00000091039,ENSG00000198513,ENSG00000108424
GO:CC	AP-type membrane coat adaptor complex	GO:0030119	0.00106643	2.97207	41	5369	26	18964	ENSG00000118473,ENSG00000134262,ENSG00000131374,ENSG00000161203,ENSG00000177879,ENSG00000242802,ENSG00000006715,ENSG00000221838,ENSG00000106367,ENSG00000070718,ENSG00000185009,ENSG00000183020,ENSG00000160695,ENSG00000139719,ENSG00000213983,ENSG00000100478,ENSG00000104142,ENSG00000166887,ENSG00000103723,ENSG00000006125,ENSG00000065000,ENSG00000072958,ENSG00000196961,ENSG00000125843,ENSG00000100280…
GO:CC	integral component of synaptic vesicle membrane	GO:0030285	0.00164066	2.78498	35	5369	23	18964	ENSG00000116329,ENSG00000197106,ENSG00000159164,ENSG00000117533,ENSG00000135823,ENSG00000115194,ENSG00000152128,ENSG00000163630,ENSG00000109572,ENSG00000122012,ENSG00000213760,ENSG00000106089,ENSG00000155093,ENSG00000082556,ENSG00000139190,ENSG00000067715,ENSG00000220205,ENSG00000132872,ENSG00000105426,ENSG00000104888,ENSG00000101438,ENSG00000100321,ENSG00000102003
GO:CC	main axon	GO:0044304	0.00189789	2.72173	68	5369	37	18964	ENSG00000069424,ENSG00000177301,ENSG00000143473,ENSG00000136531,ENSG00000144285,ENSG00000078018,ENSG00000187094,ENSG00000185008,ENSG00000169282,ENSG00000131711,ENSG00000145708,ENSG00000152377,ENSG00000091129,ENSG00000174469,ENSG00000029534,ENSG00000184156,ENSG00000106976,ENSG00000166313,ENSG00000187486,ENSG00000129159,ENSG00000134780,ENSG00000150672,ENSG00000154096,ENSG00000111262,ENSG00000196876…
GO:CC	voltage-gated sodium channel complex	GO:0001518	0.00202433	2.69372	17	5369	14	18964	ENSG00000153253,ENSG00000136531,ENSG00000144285,ENSG00000169432,ENSG00000136546,ENSG00000183873,ENSG00000177098,ENSG00000149575,ENSG00000166257,ENSG00000196876,ENSG00000196557,ENSG00000006283,ENSG00000007314,ENSG00000100346
GO:CC	presynaptic active zone membrane	GO:0048787	0.00207766	2.68242	31	5369	21	18964	ENSG00000162631,ENSG00000132718,ENSG00000058668,ENSG00000115155,ENSG00000179915,ENSG00000178750,ENSG00000150625,ENSG00000040731,ENSG00000106089,ENSG00000157680,ENSG00000157168,ENSG00000107282,ENSG00000136854,ENSG00000070961,ENSG00000156642,ENSG00000213578,ENSG00000099365,ENSG00000132589,ENSG00000108797,ENSG00000170558,ENSG00000126243
GO:CC	endosome	GO:0005768	0.00227446	2.64312	993	5369	343	18964	ENSG00000067606,ENSG00000171603,ENSG00000011021,ENSG00000116786,ENSG00000159363,ENSG00000076864,ENSG00000070886,ENSG00000020129,ENSG00000116954,ENSG00000123091,ENSG00000085832,ENSG00000169213,ENSG00000157077,ENSG00000116209,ENSG00000162434,ENSG00000116299,ENSG00000156097,ENSG00000134262,ENSG00000134259,ENSG00000163399,ENSG00000136631,ENSG00000143376,ENSG00000160753,ENSG00000132718,ENSG00000198400…
GO:CC	presynaptic cytosol	GO:0099523	0.00293139	2.53293	12	5369	11	18964	ENSG00000174013,ENSG00000197386,ENSG00000164506,ENSG00000104327,ENSG00000107130,ENSG00000109971,ENSG00000188906,ENSG00000100505,ENSG00000166501,ENSG00000175866,ENSG00000126583
GO:CC	terminal bouton	GO:0043195	0.00339862	2.4687	57	5369	32	18964	ENSG00000163873,ENSG00000132718,ENSG00000115977,ENSG00000187094,ENSG00000168993,ENSG00000145335,ENSG00000164099,ENSG00000145920,ENSG00000079689,ENSG00000164418,ENSG00000155093,ENSG00000092964,ENSG00000104327,ENSG00000198722,ENSG00000176884,ENSG00000110680,ENSG00000109971,ENSG00000188906,ENSG00000050438,ENSG00000166006,ENSG00000137766,ENSG00000213578,ENSG00000162065,ENSG00000172137,ENSG00000141433…
GO:CC	axon cytoplasm	GO:1904115	0.00360842	2.44268	62	5369	34	18964	ENSG00000186094,ENSG00000021574,ENSG00000168280,ENSG00000130294,ENSG00000182606,ENSG00000198836,ENSG00000154277,ENSG00000137463,ENSG00000177879,ENSG00000131437,ENSG00000072803,ENSG00000047579,ENSG00000277586,ENSG00000070718,ENSG00000147642,ENSG00000135049,ENSG00000185009,ENSG00000130643,ENSG00000150672,ENSG00000155980,ENSG00000166963,ENSG00000103723,ENSG00000138834,ENSG00000132604,ENSG00000007168…
GO:CC	presynaptic cytoskeleton	GO:0099569	0.00412414	2.38467	9	5369	9	18964	ENSG00000117016,ENSG00000164061,ENSG00000187672,ENSG00000079841,ENSG00000186472,ENSG00000277586,ENSG00000176406,ENSG00000082805,ENSG00000100167
GO:CC	cytoplasmic vesicle membrane	GO:0030659	0.0045945	2.33776	789	5369	277	18964	ENSG00000158109,ENSG00000069424,ENSG00000204624,ENSG00000162552,ENSG00000116329,ENSG00000169213,ENSG00000118473,ENSG00000197106,ENSG00000134207,ENSG00000265808,ENSG00000159164,ENSG00000132718,ENSG00000122218,ENSG00000143147,ENSG00000117533,ENSG00000120341,ENSG00000135823,ENSG00000157064,ENSG00000143858,ENSG00000117153,ENSG00000159348,ENSG00000162896,ENSG00000196352,ENSG00000143753,ENSG00000143786…
GO:CC	dense core granule	GO:0031045	0.00563533	2.24908	28	5369	19	18964	ENSG00000116329,ENSG00000143858,ENSG00000171951,ENSG00000130294,ENSG00000170011,ENSG00000163618,ENSG00000145087,ENSG00000145708,ENSG00000164506,ENSG00000122585,ENSG00000181195,ENSG00000197969,ENSG00000107130,ENSG00000011347,ENSG00000067715,ENSG00000100604,ENSG00000104093,ENSG00000132872,ENSG00000129990
GO:CC	leading edge membrane	GO:0031256	0.00596334	2.22451	179	5369	77	18964	ENSG00000116329,ENSG00000121905,ENSG00000116396,ENSG00000177301,ENSG00000159445,ENSG00000143473,ENSG00000035115,ENSG00000136002,ENSG00000061676,ENSG00000163539,ENSG00000185008,ENSG00000109158,ENSG00000109572,ENSG00000134982,ENSG00000131504,ENSG00000187678,ENSG00000155511,ENSG00000145863,ENSG00000022355,ENSG00000113327,ENSG00000113763,ENSG00000111913,ENSG00000124507,ENSG00000152894,ENSG00000078053…
GO:CC	sodium channel complex	GO:0034706	0.00620429	2.20731	26	5369	18	18964	ENSG00000163873,ENSG00000153253,ENSG00000136531,ENSG00000144285,ENSG00000169432,ENSG00000136546,ENSG00000183873,ENSG00000164418,ENSG00000177098,ENSG00000149575,ENSG00000149403,ENSG00000166257,ENSG00000196876,ENSG00000196557,ENSG00000006283,ENSG00000007314,ENSG00000105737,ENSG00000100346
GO:CC	cell cortex	GO:0005938	0.00666607	2.17613	326	5369	127	18964	ENSG00000067606,ENSG00000188807,ENSG00000159023,ENSG00000131236,ENSG00000117016,ENSG00000137942,ENSG00000178104,ENSG00000058085,ENSG00000143801,ENSG00000173409,ENSG00000116903,ENSG00000077522,ENSG00000184731,ENSG00000115216,ENSG00000143951,ENSG00000204843,ENSG00000115091,ENSG00000074054,ENSG00000128683,ENSG00000196277,ENSG00000163539,ENSG00000170011,ENSG00000168036,ENSG00000182606,ENSG00000164061…
GO:CC	parallel fiber to Purkinje cell synapse	GO:0098688	0.0141282	1.84991	13	5369	11	18964	ENSG00000221823,ENSG00000162989,ENSG00000134115,ENSG00000152208,ENSG00000173898,ENSG00000137766,ENSG00000102924,ENSG00000172137,ENSG00000101333,ENSG00000159082,ENSG00000099957
GO:CC	clathrin-sculpted gamma-aminobutyric acid transport vesicle	GO:0061200	0.0145826	1.83617	8	5369	8	18964	ENSG00000128683,ENSG00000136750,ENSG00000109971,ENSG00000067715,ENSG00000220205,ENSG00000105649,ENSG00000101438,ENSG00000101152
GO:CC	clathrin-sculpted gamma-aminobutyric acid transport vesicle membrane	GO:0061202	0.0145826	1.83617	8	5369	8	18964	ENSG00000128683,ENSG00000136750,ENSG00000109971,ENSG00000067715,ENSG00000220205,ENSG00000105649,ENSG00000101438,ENSG00000101152
GO:CC	T-tubule	GO:0030315	0.0168744	1.77277	53	5369	29	18964	ENSG00000090020,ENSG00000163399,ENSG00000143318,ENSG00000198929,ENSG00000143153,ENSG00000058668,ENSG00000183023,ENSG00000162989,ENSG00000136531,ENSG00000144285,ENSG00000144681,ENSG00000183873,ENSG00000157388,ENSG00000145362,ENSG00000080709,ENSG00000153956,ENSG00000165995,ENSG00000107758,ENSG00000187486,ENSG00000151067,ENSG00000167535,ENSG00000151320,ENSG00000185567,ENSG00000125166,ENSG00000075461…
GO:CC	ubiquitin ligase complex	GO:0000151	0.0184431	1.73417	299	5369	116	18964	ENSG00000130939,ENSG00000116661,ENSG00000132879,ENSG00000142784,ENSG00000130772,ENSG00000116514,ENSG00000123091,ENSG00000162378,ENSG00000174842,ENSG00000143164,ENSG00000116161,ENSG00000143207,ENSG00000121481,ENSG00000117153,ENSG00000143476,ENSG00000115289,ENSG00000153561,ENSG00000213337,ENSG00000153107,ENSG00000115827,ENSG00000036257,ENSG00000113851,ENSG00000153558,ENSG00000163376,ENSG00000114626…
GO:CC	extrinsic component of membrane	GO:0019898	0.0214678	1.66821	315	5369	121	18964	ENSG00000078369,ENSG00000069424,ENSG00000121905,ENSG00000117461,ENSG00000203965,ENSG00000134262,ENSG00000134207,ENSG00000177628,ENSG00000135824,ENSG00000163050,ENSG00000168243,ENSG00000171150,ENSG00000115977,ENSG00000066032,ENSG00000198648,ENSG00000130294,ENSG00000144559,ENSG00000144681,ENSG00000168036,ENSG00000196455,ENSG00000158220,ENSG00000051382,ENSG00000169282,ENSG00000198836,ENSG00000061938…
GO:CC	hippocampal mossy fiber to CA3 synapse	GO:0098686	0.0313971	1.50311	35	5369	21	18964	ENSG00000143740,ENSG00000115194,ENSG00000091428,ENSG00000146006,ENSG00000047579,ENSG00000135333,ENSG00000164418,ENSG00000118507,ENSG00000164506,ENSG00000188191,ENSG00000164742,ENSG00000104327,ENSG00000164924,ENSG00000107295,ENSG00000011347,ENSG00000173227,ENSG00000149403,ENSG00000067715,ENSG00000108947,ENSG00000105737,ENSG00000166862
GO:CC	nucleoplasm	GO:0005654	0.0316191	1.50005	4112	5369	1261	18964	ENSG00000188976,ENSG00000160075,ENSG00000157933,ENSG00000197921,ENSG00000169598,ENSG00000198912,ENSG00000131697,ENSG00000116254,ENSG00000097021,ENSG00000162408,ENSG00000116273,ENSG00000007923,ENSG00000175279,ENSG00000198793,ENSG00000116731,ENSG00000189337,ENSG00000197312,ENSG00000090686,ENSG00000133216,ENSG00000004487,ENSG00000125944,ENSG00000125945,ENSG00000175087,ENSG00000090020,ENSG00000142784…
GO:CC	region of cytosol	GO:0099522	0.0420912	1.37581	22	5369	15	18964	ENSG00000198793,ENSG00000174013,ENSG00000197386,ENSG00000152413,ENSG00000113758,ENSG00000164506,ENSG00000104327,ENSG00000107130,ENSG00000109971,ENSG00000188906,ENSG00000100505,ENSG00000166501,ENSG00000175866,ENSG00000127445,ENSG00000126583
GO:CC	L-type voltage-gated calcium channel complex	GO:1990454	0.0425287	1.37132	12	5369	10	18964	ENSG00000198929,ENSG00000157388,ENSG00000153956,ENSG00000165995,ENSG00000151067,ENSG00000167535,ENSG00000075461,ENSG00000108878,ENSG00000105605,ENSG00000142408
GO:CC	anchored component of synaptic vesicle membrane	GO:0098993	0.0425287	1.37132	12	5369	10	18964	ENSG00000169213,ENSG00000168118,ENSG00000152932,ENSG00000111737,ENSG00000213578,ENSG00000167964,ENSG00000041353,ENSG00000105649,ENSG00000101152,ENSG00000008056
KEGG	Glutamatergic synapse	KEGG:04724	1.03899e-10	9.98339	114	2165	67	8000	ENSG00000078369,ENSG00000163873,ENSG00000142875,ENSG00000168243,ENSG00000221823,ENSG00000162989,ENSG00000115419,ENSG00000150995,ENSG00000196277,ENSG00000164082,ENSG00000157388,ENSG00000173175,ENSG00000138814,ENSG00000120251,ENSG00000152413,ENSG00000155511,ENSG00000113262,ENSG00000124493,ENSG00000164418,ENSG00000152822,ENSG00000164742,ENSG00000179603,ENSG00000106688,ENSG00000198785,ENSG00000242616…
KEGG	Circadian entrainment	KEGG:04713	1.34494e-09	8.8713	97	2165	58	8000	ENSG00000078369,ENSG00000169885,ENSG00000142875,ENSG00000162728,ENSG00000198929,ENSG00000168243,ENSG00000198626,ENSG00000162989,ENSG00000118260,ENSG00000132326,ENSG00000150995,ENSG00000157388,ENSG00000173175,ENSG00000145349,ENSG00000164116,ENSG00000061918,ENSG00000120251,ENSG00000070808,ENSG00000155511,ENSG00000058404,ENSG00000164742,ENSG00000242616,ENSG00000176884,ENSG00000178363,ENSG00000148660…
KEGG	Dopaminergic synapse	KEGG:04728	4.56057e-08	7.34098	131	2165	69	8000	ENSG00000078369,ENSG00000169885,ENSG00000142875,ENSG00000162728,ENSG00000168243,ENSG00000117020,ENSG00000168280,ENSG00000162989,ENSG00000144285,ENSG00000118260,ENSG00000150995,ENSG00000157388,ENSG00000082701,ENSG00000173175,ENSG00000074211,ENSG00000134852,ENSG00000138814,ENSG00000145349,ENSG00000120251,ENSG00000113575,ENSG00000156475,ENSG00000070808,ENSG00000155511,ENSG00000184845,ENSG00000050748…
KEGG	Axon guidance	KEGG:04360	2.93185e-07	6.53286	181	2165	86	8000	ENSG00000067606,ENSG00000162552,ENSG00000070886,ENSG00000133216,ENSG00000117461,ENSG00000162631,ENSG00000143434,ENSG00000143590,ENSG00000196189,ENSG00000076356,ENSG00000134318,ENSG00000157851,ENSG00000221823,ENSG00000135622,ENSG00000071051,ENSG00000116106,ENSG00000066248,ENSG00000196220,ENSG00000185008,ENSG00000169855,ENSG00000044524,ENSG00000080224,ENSG00000082701,ENSG00000082684,ENSG00000114554…
KEGG	Cholinergic synapse	KEGG:04725	4.30758e-07	6.36577	113	2165	60	8000	ENSG00000078369,ENSG00000117013,ENSG00000117461,ENSG00000142875,ENSG00000160716,ENSG00000168243,ENSG00000117020,ENSG00000162989,ENSG00000118260,ENSG00000150995,ENSG00000157388,ENSG00000173175,ENSG00000051382,ENSG00000145349,ENSG00000145675,ENSG00000152495,ENSG00000070808,ENSG00000185760,ENSG00000058404,ENSG00000164742,ENSG00000087085,ENSG00000181072,ENSG00000184156,ENSG00000242616,ENSG00000148408…
KEGG	Adrenergic signaling in cardiomyocytes	KEGG:04261	4.9964e-07	6.30134	150	2165	74	8000	ENSG00000169885,ENSG00000090020,ENSG00000142875,ENSG00000163399,ENSG00000143549,ENSG00000143153,ENSG00000058668,ENSG00000198626,ENSG00000117020,ENSG00000183023,ENSG00000182389,ENSG00000136546,ENSG00000091428,ENSG00000118260,ENSG00000157087,ENSG00000183873,ENSG00000007402,ENSG00000157388,ENSG00000157445,ENSG00000173175,ENSG00000069849,ENSG00000074211,ENSG00000145349,ENSG00000113575,ENSG00000156475…
KEGG	Morphine addiction	KEGG:05032	7.25573e-07	6.13932	89	2165	50	8000	ENSG00000078369,ENSG00000187730,ENSG00000142875,ENSG00000162728,ENSG00000168243,ENSG00000162989,ENSG00000115252,ENSG00000173175,ENSG00000125388,ENSG00000109158,ENSG00000145864,ENSG00000145863,ENSG00000022355,ENSG00000113327,ENSG00000184845,ENSG00000198055,ENSG00000204681,ENSG00000171408,ENSG00000112541,ENSG00000164742,ENSG00000136928,ENSG00000242616,ENSG00000148408,ENSG00000198873,ENSG00000162188…
KEGG	GABAergic synapse	KEGG:04727	7.25573e-07	6.13932	89	2165	50	8000	ENSG00000078369,ENSG00000187730,ENSG00000142875,ENSG00000168243,ENSG00000128683,ENSG00000115419,ENSG00000157103,ENSG00000157388,ENSG00000173175,ENSG00000109158,ENSG00000145864,ENSG00000145863,ENSG00000022355,ENSG00000113327,ENSG00000204681,ENSG00000164742,ENSG00000136928,ENSG00000242616,ENSG00000148408,ENSG00000136750,ENSG00000162188,ENSG00000151067,ENSG00000111664,ENSG00000139112,ENSG00000111371…
KEGG	Oxytocin signaling pathway	KEGG:04921	8.1061e-07	6.09119	154	2165	75	8000	ENSG00000169885,ENSG00000175206,ENSG00000162409,ENSG00000177606,ENSG00000142875,ENSG00000162728,ENSG00000116741,ENSG00000008118,ENSG00000198626,ENSG00000134318,ENSG00000221823,ENSG00000182389,ENSG00000162989,ENSG00000150995,ENSG00000007402,ENSG00000157388,ENSG00000157445,ENSG00000173175,ENSG00000138814,ENSG00000145349,ENSG00000164116,ENSG00000061918,ENSG00000081189,ENSG00000152495,ENSG00000070808…
KEGG	GnRH secretion	KEGG:04929	1.58484e-06	5.80001	64	2165	39	8000	ENSG00000117461,ENSG00000143630,ENSG00000162728,ENSG00000170498,ENSG00000117020,ENSG00000162989,ENSG00000150995,ENSG00000157388,ENSG00000051382,ENSG00000164588,ENSG00000145675,ENSG00000080709,ENSG00000204681,ENSG00000135346,ENSG00000136928,ENSG00000187486,ENSG00000151067,ENSG00000133703,ENSG00000169032,ENSG00000196557,ENSG00000166501,ENSG00000102882,ENSG00000006283,ENSG00000099822,ENSG00000116014…
KEGG	Synaptic vesicle cycle	KEGG:04721	5.0603e-06	5.29582	78	2165	44	8000	ENSG00000197959,ENSG00000250565,ENSG00000157103,ENSG00000114573,ENSG00000161203,ENSG00000168993,ENSG00000011083,ENSG00000145920,ENSG00000213760,ENSG00000079841,ENSG00000106089,ENSG00000171130,ENSG00000147416,ENSG00000047249,ENSG00000155097,ENSG00000106688,ENSG00000198722,ENSG00000136888,ENSG00000136854,ENSG00000106976,ENSG00000148408,ENSG00000183020,ENSG00000067715,ENSG00000137766,ENSG00000213578…
KEGG	Amphetamine addiction	KEGG:05031	7.49955e-06	5.12496	69	2165	40	8000	ENSG00000169885,ENSG00000177606,ENSG00000142875,ENSG00000221823,ENSG00000118260,ENSG00000157388,ENSG00000173175,ENSG00000138814,ENSG00000145349,ENSG00000120251,ENSG00000152495,ENSG00000070808,ENSG00000155511,ENSG00000184845,ENSG00000196591,ENSG00000058404,ENSG00000132437,ENSG00000106089,ENSG00000198576,ENSG00000198785,ENSG00000176884,ENSG00000178363,ENSG00000107758,ENSG00000148660,ENSG00000172531…
KEGG	Nicotine addiction	KEGG:05033	1.34974e-05	4.86975	40	2165	27	8000	ENSG00000187730,ENSG00000160716,ENSG00000109158,ENSG00000120251,ENSG00000155511,ENSG00000145864,ENSG00000145863,ENSG00000022355,ENSG00000113327,ENSG00000198785,ENSG00000176884,ENSG00000148408,ENSG00000152578,ENSG00000273079,ENSG00000166206,ENSG00000186297,ENSG00000182256,ENSG00000175344,ENSG00000183454,ENSG00000141837,ENSG00000105464,ENSG00000104888,ENSG00000101438,ENSG00000101204,ENSG00000125675…
KEGG	Aldosterone synthesis and secretion	KEGG:04925	1.52596e-05	4.81646	98	2165	51	8000	ENSG00000169885,ENSG00000175206,ENSG00000142875,ENSG00000163399,ENSG00000143153,ENSG00000058668,ENSG00000008118,ENSG00000115138,ENSG00000171303,ENSG00000171132,ENSG00000153234,ENSG00000118260,ENSG00000150995,ENSG00000157087,ENSG00000157388,ENSG00000173175,ENSG00000069849,ENSG00000145349,ENSG00000152495,ENSG00000070808,ENSG00000164535,ENSG00000058404,ENSG00000164742,ENSG00000147465,ENSG00000169427…
KEGG	Long-term potentiation	KEGG:04720	3.5304e-05	4.45218	67	2165	38	8000	ENSG00000169885,ENSG00000142875,ENSG00000221823,ENSG00000150995,ENSG00000138814,ENSG00000145349,ENSG00000120251,ENSG00000152495,ENSG00000070808,ENSG00000155511,ENSG00000152822,ENSG00000058404,ENSG00000164742,ENSG00000157764,ENSG00000176884,ENSG00000178363,ENSG00000107758,ENSG00000148660,ENSG00000172531,ENSG00000168959,ENSG00000151067,ENSG00000273079,ENSG00000133703,ENSG00000135447,ENSG00000198668…
KEGG	Calcium signaling pathway	KEGG:04020	5.01265e-05	4.29993	239	2165	100	8000	ENSG00000169885,ENSG00000122420,ENSG00000142875,ENSG00000134259,ENSG00000198400,ENSG00000143318,ENSG00000198216,ENSG00000058668,ENSG00000008118,ENSG00000198626,ENSG00000183023,ENSG00000221823,ENSG00000115252,ENSG00000178568,ENSG00000115556,ENSG00000150995,ENSG00000157087,ENSG00000157388,ENSG00000109689,ENSG00000138814,ENSG00000145349,ENSG00000151729,ENSG00000152495,ENSG00000213585,ENSG00000070808…
KEGG	Spinocerebellar ataxia	KEGG:05017	0.000143511	3.84312	142	2165	65	8000	ENSG00000198793,ENSG00000126067,ENSG00000117461,ENSG00000173406,ENSG00000171385,ENSG00000117020,ENSG00000055917,ENSG00000150995,ENSG00000196455,ENSG00000051382,ENSG00000175166,ENSG00000198836,ENSG00000138741,ENSG00000120251,ENSG00000151729,ENSG00000145675,ENSG00000213585,ENSG00000155511,ENSG00000050748,ENSG00000124788,ENSG00000028839,ENSG00000152822,ENSG00000157954,ENSG00000189056,ENSG00000147852…
KEGG	Insulin secretion	KEGG:04911	0.000205609	3.68696	86	2165	44	8000	ENSG00000142875,ENSG00000163399,ENSG00000143153,ENSG00000198626,ENSG00000091428,ENSG00000118260,ENSG00000187094,ENSG00000157388,ENSG00000173175,ENSG00000069849,ENSG00000197584,ENSG00000145349,ENSG00000080709,ENSG00000070808,ENSG00000106633,ENSG00000058404,ENSG00000164742,ENSG00000106089,ENSG00000186472,ENSG00000176406,ENSG00000148660,ENSG00000156113,ENSG00000187486,ENSG00000006071,ENSG00000137731…
KEGG	Phosphatidylinositol signaling system	KEGG:04070	0.000243364	3.61374	97	2165	48	8000	ENSG00000169885,ENSG00000117461,ENSG00000040933,ENSG00000115556,ENSG00000077044,ENSG00000150995,ENSG00000211456,ENSG00000068745,ENSG00000176095,ENSG00000051382,ENSG00000058866,ENSG00000145214,ENSG00000163624,ENSG00000109452,ENSG00000145675,ENSG00000136267,ENSG00000157680,ENSG00000003987,ENSG00000104331,ENSG00000133731,ENSG00000155099,ENSG00000107242,ENSG00000178363,ENSG00000155252,ENSG00000198825…
KEGG	Endocrine and other factor-regulated calcium reabsorption	KEGG:04961	0.000673862	3.17143	53	2165	30	8000	ENSG00000142875,ENSG00000163399,ENSG00000143153,ENSG00000197959,ENSG00000058668,ENSG00000183023,ENSG00000157087,ENSG00000069849,ENSG00000161203,ENSG00000104327,ENSG00000106976,ENSG00000183020,ENSG00000137731,ENSG00000070961,ENSG00000133116,ENSG00000100678,ENSG00000162104,ENSG00000166501,ENSG00000006125,ENSG00000141367,ENSG00000072062,ENSG00000105409,ENSG00000118160,ENSG00000196961,ENSG00000126583…
KEGG	cAMP signaling pathway	KEGG:04024	0.00175057	2.75682	216	2165	87	8000	ENSG00000169885,ENSG00000175206,ENSG00000179546,ENSG00000090020,ENSG00000117461,ENSG00000177606,ENSG00000142875,ENSG00000134215,ENSG00000163399,ENSG00000143153,ENSG00000058668,ENSG00000198626,ENSG00000117020,ENSG00000134318,ENSG00000115138,ENSG00000091428,ENSG00000118260,ENSG00000157087,ENSG00000157388,ENSG00000179097,ENSG00000173175,ENSG00000051382,ENSG00000069849,ENSG00000145349,ENSG00000120251…
KEGG	Serotonergic synapse	KEGG:04726	0.00241491	2.6171	112	2165	51	8000	ENSG00000078369,ENSG00000179546,ENSG00000186377,ENSG00000142875,ENSG00000162728,ENSG00000168243,ENSG00000162989,ENSG00000150995,ENSG00000157388,ENSG00000179097,ENSG00000173175,ENSG00000080709,ENSG00000145864,ENSG00000135312,ENSG00000168830,ENSG00000132437,ENSG00000184408,ENSG00000157764,ENSG00000157219,ENSG00000242616,ENSG00000148408,ENSG00000148680,ENSG00000138115,ENSG00000162188,ENSG00000151067…
KEGG	Aminoacyl-tRNA biosynthesis	KEGG:00970	0.00376812	2.42388	44	2165	25	8000	ENSG00000134684,ENSG00000162396,ENSG00000031698,ENSG00000143374,ENSG00000117593,ENSG00000136628,ENSG00000067704,ENSG00000116120,ENSG00000113407,ENSG00000170445,ENSG00000113643,ENSG00000145982,ENSG00000106105,ENSG00000196305,ENSG00000179988,ENSG00000110619,ENSG00000137513,ENSG00000139131,ENSG00000166986,ENSG00000257218,ENSG00000140105,ENSG00000103707,ENSG00000103356,ENSG00000090861,ENSG00000179115
KEGG	Aldosterone-regulated sodium reabsorption	KEGG:04960	0.00433707	2.3628	37	2165	22	8000	ENSG00000175793,ENSG00000117461,ENSG00000163399,ENSG00000143153,ENSG00000169047,ENSG00000051382,ENSG00000069849,ENSG00000151623,ENSG00000145675,ENSG00000137731,ENSG00000151704,ENSG00000133703,ENSG00000017427,ENSG00000140992,ENSG00000166501,ENSG00000102882,ENSG00000176387,ENSG00000049759,ENSG00000105647,ENSG00000105409,ENSG00000126583,ENSG00000100030
KEGG	ErbB signaling pathway	KEGG:04012	0.00540417	2.26727	84	2165	40	8000	ENSG00000198793,ENSG00000117461,ENSG00000177606,ENSG00000143322,ENSG00000117020,ENSG00000071051,ENSG00000178568,ENSG00000114423,ENSG00000082701,ENSG00000158092,ENSG00000051382,ENSG00000145349,ENSG00000145675,ENSG00000070808,ENSG00000050748,ENSG00000058404,ENSG00000157764,ENSG00000157168,ENSG00000148082,ENSG00000107643,ENSG00000148660,ENSG00000149269,ENSG00000111276,ENSG00000133703,ENSG00000137843…
KEGG	Retrograde endocannabinoid signaling	KEGG:04723	0.00769353	2.11387	148	2165	62	8000	ENSG00000078369,ENSG00000187730,ENSG00000142875,ENSG00000162728,ENSG00000158864,ENSG00000168243,ENSG00000162989,ENSG00000023228,ENSG00000130414,ENSG00000150995,ENSG00000157388,ENSG00000173175,ENSG00000109158,ENSG00000120251,ENSG00000155511,ENSG00000145864,ENSG00000145863,ENSG00000022355,ENSG00000113327,ENSG00000050748,ENSG00000112062,ENSG00000156711,ENSG00000079841,ENSG00000118432,ENSG00000152822…
KEGG	Pathways of neurodegeneration - multiple diseases	KEGG:05022	0.00777639	2.10922	475	2165	166	8000	ENSG00000107404,ENSG00000169885,ENSG00000198793,ENSG00000233954,ENSG00000162552,ENSG00000126067,ENSG00000134245,ENSG00000158864,ENSG00000158882,ENSG00000118217,ENSG00000143801,ENSG00000143816,ENSG00000198626,ENSG00000221823,ENSG00000204843,ENSG00000115317,ENSG00000172071,ENSG00000115073,ENSG00000075886,ENSG00000168280,ENSG00000003393,ENSG00000023228,ENSG00000115596,ENSG00000127824,ENSG00000130414…
KEGG	mTOR signaling pathway	KEGG:04150	0.00786208	2.10446	154	2165	64	8000	ENSG00000107404,ENSG00000198793,ENSG00000162552,ENSG00000130766,ENSG00000116954,ENSG00000117461,ENSG00000162409,ENSG00000134245,ENSG00000143816,ENSG00000117020,ENSG00000250565,ENSG00000115596,ENSG00000169047,ENSG00000135932,ENSG00000135930,ENSG00000114573,ENSG00000082701,ENSG00000051382,ENSG00000052795,ENSG00000145675,ENSG00000175766,ENSG00000145979,ENSG00000213760,ENSG00000025039,ENSG00000106070…
KEGG	Gap junction	KEGG:04540	0.00818493	2.08698	88	2165	41	8000	ENSG00000142875,ENSG00000075886,ENSG00000127824,ENSG00000150995,ENSG00000173175,ENSG00000164116,ENSG00000061918,ENSG00000184845,ENSG00000137267,ENSG00000196230,ENSG00000152822,ENSG00000164742,ENSG00000188229,ENSG00000261456,ENSG00000168959,ENSG00000170962,ENSG00000152402,ENSG00000149295,ENSG00000133703,ENSG00000123416,ENSG00000102468,ENSG00000159248,ENSG00000169032,ENSG00000137764,ENSG00000162104…
KEGG	Type II diabetes mellitus	KEGG:04930	0.010299	1.98721	46	2165	25	8000	ENSG00000067606,ENSG00000198793,ENSG00000117461,ENSG00000143627,ENSG00000198216,ENSG00000171132,ENSG00000169047,ENSG00000163932,ENSG00000157388,ENSG00000051382,ENSG00000145675,ENSG00000050748,ENSG00000106633,ENSG00000148408,ENSG00000107643,ENSG00000156515,ENSG00000187486,ENSG00000006071,ENSG00000151067,ENSG00000185950,ENSG00000102882,ENSG00000006283,ENSG00000141837,ENSG00000105647,ENSG00000100030
KEGG	Neuroactive ligand-receptor interaction	KEGG:04080	0.0136988	1.86332	340	2165	123	8000	ENSG00000187730,ENSG00000241563,ENSG00000179546,ENSG00000116329,ENSG00000121764,ENSG00000163873,ENSG00000122420,ENSG00000160716,ENSG00000170498,ENSG00000115138,ENSG00000274286,ENSG00000196277,ENSG00000151090,ENSG00000187094,ENSG00000114812,ENSG00000145040,ENSG00000164082,ENSG00000179097,ENSG00000170893,ENSG00000188958,ENSG00000184160,ENSG00000109158,ENSG00000109163,ENSG00000152208,ENSG00000109738…
KEGG	GnRH signaling pathway	KEGG:04912	0.0162172	1.79002	93	2165	42	8000	ENSG00000169885,ENSG00000177606,ENSG00000142875,ENSG00000150995,ENSG00000163932,ENSG00000157388,ENSG00000173175,ENSG00000109163,ENSG00000145349,ENSG00000120738,ENSG00000070808,ENSG00000050748,ENSG00000112062,ENSG00000156711,ENSG00000135346,ENSG00000058404,ENSG00000164742,ENSG00000120899,ENSG00000178363,ENSG00000107643,ENSG00000148660,ENSG00000151067,ENSG00000133703,ENSG00000198668,ENSG00000169032…
KEGG	Oocyte meiosis	KEGG:04114	0.0181053	1.74219	128	2165	54	8000	ENSG00000169885,ENSG00000142875,ENSG00000221823,ENSG00000169679,ENSG00000153107,ENSG00000150995,ENSG00000173175,ENSG00000138814,ENSG00000145349,ENSG00000164109,ENSG00000134057,ENSG00000113575,ENSG00000158402,ENSG00000070808,ENSG00000164611,ENSG00000072803,ENSG00000112062,ENSG00000156711,ENSG00000112640,ENSG00000112029,ENSG00000002822,ENSG00000058404,ENSG00000164742,ENSG00000170027,ENSG00000214300…
KEGG	cGMP-PKG signaling pathway	KEGG:04022	0.0291892	1.53478	166	2165	66	8000	ENSG00000169885,ENSG00000175206,ENSG00000120937,ENSG00000116329,ENSG00000163399,ENSG00000116604,ENSG00000143153,ENSG00000116741,ENSG00000058668,ENSG00000117020,ENSG00000134318,ENSG00000183023,ENSG00000171132,ENSG00000221823,ENSG00000274286,ENSG00000118260,ENSG00000169047,ENSG00000163273,ENSG00000150995,ENSG00000157087,ENSG00000157388,ENSG00000173175,ENSG00000069849,ENSG00000197584,ENSG00000184160…
KEGG	Long-term depression	KEGG:04730	0.03028	1.51884	59	2165	29	8000	ENSG00000150995,ENSG00000152208,ENSG00000164116,ENSG00000061918,ENSG00000120251,ENSG00000113575,ENSG00000155511,ENSG00000152822,ENSG00000106341,ENSG00000157764,ENSG00000152402,ENSG00000133703,ENSG00000017427,ENSG00000089250,ENSG00000169032,ENSG00000166501,ENSG00000102882,ENSG00000087258,ENSG00000088256,ENSG00000141837,ENSG00000196218,ENSG00000105568,ENSG00000126583,ENSG00000182621,ENSG00000101333…
KEGG	Melanogenesis	KEGG:04916	0.0310616	1.50778	101	2165	44	8000	ENSG00000107404,ENSG00000169885,ENSG00000162552,ENSG00000142875,ENSG00000134245,ENSG00000143816,ENSG00000115138,ENSG00000118260,ENSG00000115596,ENSG00000168036,ENSG00000082701,ENSG00000173175,ENSG00000157404,ENSG00000145349,ENSG00000070808,ENSG00000058404,ENSG00000164742,ENSG00000002745,ENSG00000104290,ENSG00000178363,ENSG00000148660,ENSG00000075290,ENSG00000085741,ENSG00000111186,ENSG00000133703…
KEGG	Glycosaminoglycan biosynthesis - heparan sulfate / heparin	KEGG:00534	0.0370514	1.4312	24	2165	15	8000	ENSG00000176022,ENSG00000158008,ENSG00000162694,ENSG00000136720,ENSG00000002587,ENSG00000164100,ENSG00000249853,ENSG00000012232,ENSG00000182197,ENSG00000185352,ENSG00000138604,ENSG00000122254,ENSG00000125430,ENSG00000015532,ENSG00000171004
REAC	Neuronal System	REAC:R-HSA-112316	4.63469e-49	48.334	400	3075	259	10622	ENSG00000078369,ENSG00000069424,ENSG00000117245,ENSG00000159023,ENSG00000116544,ENSG00000163873,ENSG00000117013,ENSG00000162409,ENSG00000142875,ENSG00000116396,ENSG00000177301,ENSG00000177272,ENSG00000171385,ENSG00000160716,ENSG00000143630,ENSG00000162728,ENSG00000198216,ENSG00000143858,ENSG00000143847,ENSG00000143473,ENSG00000082482,ENSG00000135750,ENSG00000168243,ENSG00000077522,ENSG00000162975…
REAC	Transmission across Chemical Synapses	REAC:R-HSA-112315	5.946e-26	25.2258	259	3075	160	10622	ENSG00000078369,ENSG00000117245,ENSG00000163873,ENSG00000162409,ENSG00000142875,ENSG00000160716,ENSG00000162728,ENSG00000198216,ENSG00000143847,ENSG00000168243,ENSG00000077522,ENSG00000075886,ENSG00000182389,ENSG00000162989,ENSG00000128683,ENSG00000115419,ENSG00000118260,ENSG00000127824,ENSG00000157103,ENSG00000157152,ENSG00000144596,ENSG00000114302,ENSG00000007402,ENSG00000157445,ENSG00000144746…
REAC	Neurotransmitter receptors and postsynaptic signal transmission	REAC:R-HSA-112314	5.4566e-18	17.2631	196	3075	119	10622	ENSG00000078369,ENSG00000117245,ENSG00000163873,ENSG00000162409,ENSG00000142875,ENSG00000160716,ENSG00000162728,ENSG00000168243,ENSG00000077522,ENSG00000075886,ENSG00000162989,ENSG00000118260,ENSG00000127824,ENSG00000144596,ENSG00000114302,ENSG00000173175,ENSG00000109158,ENSG00000145349,ENSG00000109738,ENSG00000120251,ENSG00000145451,ENSG00000152495,ENSG00000070808,ENSG00000155511,ENSG00000145864…
REAC	Protein-protein interactions at synapses	REAC:R-HSA-6794362	1.3078e-15	14.8835	86	3075	64	10622	ENSG00000159023,ENSG00000116544,ENSG00000143858,ENSG00000143847,ENSG00000179915,ENSG00000176204,ENSG00000162951,ENSG00000121871,ENSG00000169760,ENSG00000152413,ENSG00000146006,ENSG00000155511,ENSG00000156564,ENSG00000152822,ENSG00000136279,ENSG00000106089,ENSG00000198010,ENSG00000107282,ENSG00000136854,ENSG00000176884,ENSG00000198739,ENSG00000011347,ENSG00000133318,ENSG00000110076,ENSG00000173227…
REAC	Neurexins and neuroligins	REAC:R-HSA-6794361	8.89623e-14	13.0508	56	3075	46	10622	ENSG00000159023,ENSG00000116544,ENSG00000143858,ENSG00000179915,ENSG00000176204,ENSG00000162951,ENSG00000169760,ENSG00000152413,ENSG00000146006,ENSG00000152822,ENSG00000136279,ENSG00000106089,ENSG00000198010,ENSG00000107282,ENSG00000136854,ENSG00000176884,ENSG00000198739,ENSG00000011347,ENSG00000110076,ENSG00000173227,ENSG00000162105,ENSG00000150672,ENSG00000168959,ENSG00000273079,ENSG00000067715…
REAC	Potassium Channels	REAC:R-HSA-1296071	2.70703e-12	11.5675	103	3075	68	10622	ENSG00000078369,ENSG00000069424,ENSG00000117013,ENSG00000116396,ENSG00000177301,ENSG00000177272,ENSG00000171385,ENSG00000143630,ENSG00000162728,ENSG00000143473,ENSG00000082482,ENSG00000135750,ENSG00000168243,ENSG00000162975,ENSG00000170745,ENSG00000171303,ENSG00000162989,ENSG00000169282,ENSG00000197584,ENSG00000164588,ENSG00000080709,ENSG00000204681,ENSG00000124780,ENSG00000185760,ENSG00000184408…
REAC	Cardiac conduction	REAC:R-HSA-5576891	4.18067e-11	10.3788	127	3075	77	10622	ENSG00000175206,ENSG00000171385,ENSG00000163399,ENSG00000143318,ENSG00000143153,ENSG00000058668,ENSG00000082482,ENSG00000135750,ENSG00000198626,ENSG00000119782,ENSG00000171303,ENSG00000183023,ENSG00000184261,ENSG00000115041,ENSG00000153253,ENSG00000136531,ENSG00000144285,ENSG00000169432,ENSG00000136546,ENSG00000163273,ENSG00000150995,ENSG00000157087,ENSG00000183873,ENSG00000007402,ENSG00000069849…
REAC	Activation of NMDA receptors and postsynaptic events	REAC:R-HSA-442755	1.31403e-10	9.88139	89	3075	59	10622	ENSG00000117245,ENSG00000162409,ENSG00000142875,ENSG00000077522,ENSG00000075886,ENSG00000118260,ENSG00000127824,ENSG00000114302,ENSG00000145349,ENSG00000120251,ENSG00000152495,ENSG00000070808,ENSG00000155511,ENSG00000137267,ENSG00000188191,ENSG00000058404,ENSG00000164742,ENSG00000005249,ENSG00000106617,ENSG00000277586,ENSG00000157168,ENSG00000107282,ENSG00000198785,ENSG00000176884,ENSG00000188229…
REAC	Phase 0 - rapid depolarisation	REAC:R-HSA-5576892	5.28085e-08	7.2773	32	3075	27	10622	ENSG00000153253,ENSG00000136531,ENSG00000144285,ENSG00000169432,ENSG00000136546,ENSG00000183873,ENSG00000007402,ENSG00000114279,ENSG00000145349,ENSG00000070808,ENSG00000058404,ENSG00000165995,ENSG00000148660,ENSG00000177098,ENSG00000149575,ENSG00000166257,ENSG00000151067,ENSG00000196876,ENSG00000102466,ENSG00000198668,ENSG00000108961,ENSG00000067191,ENSG00000007314,ENSG00000075461,ENSG00000105605…
REAC	Post NMDA receptor activation events	REAC:R-HSA-438064	2.76032e-07	6.55904	76	3075	48	10622	ENSG00000162409,ENSG00000142875,ENSG00000077522,ENSG00000075886,ENSG00000118260,ENSG00000127824,ENSG00000114302,ENSG00000145349,ENSG00000120251,ENSG00000152495,ENSG00000070808,ENSG00000155511,ENSG00000137267,ENSG00000188191,ENSG00000058404,ENSG00000164742,ENSG00000005249,ENSG00000106617,ENSG00000277586,ENSG00000157168,ENSG00000176884,ENSG00000188229,ENSG00000261456,ENSG00000148660,ENSG00000150672…
REAC	Voltage gated Potassium channels	REAC:R-HSA-1296072	4.16162e-07	6.38074	43	3075	32	10622	ENSG00000069424,ENSG00000117013,ENSG00000116396,ENSG00000177301,ENSG00000177272,ENSG00000171385,ENSG00000143473,ENSG00000162975,ENSG00000170745,ENSG00000169282,ENSG00000185760,ENSG00000184408,ENSG00000055118,ENSG00000156486,ENSG00000184156,ENSG00000168263,ENSG00000129159,ENSG00000182255,ENSG00000111262,ENSG00000130037,ENSG00000135519,ENSG00000166006,ENSG00000170049,ENSG00000089558,ENSG00000173826…
REAC	L1CAM interactions	REAC:R-HSA-373760	1.70573e-06	5.76809	119	3075	65	10622	ENSG00000133216,ENSG00000197959,ENSG00000075886,ENSG00000153253,ENSG00000136531,ENSG00000144285,ENSG00000169432,ENSG00000136546,ENSG00000127824,ENSG00000134121,ENSG00000134115,ENSG00000144668,ENSG00000183873,ENSG00000170017,ENSG00000172020,ENSG00000161203,ENSG00000145362,ENSG00000137267,ENSG00000010017,ENSG00000091136,ENSG00000091129,ENSG00000092964,ENSG00000029534,ENSG00000137575,ENSG00000184156…
REAC	Long-term potentiation	REAC:R-HSA-9620244	3.11203e-06	5.50696	21	3075	19	10622	ENSG00000077522,ENSG00000145349,ENSG00000120251,ENSG00000070808,ENSG00000155511,ENSG00000058404,ENSG00000277586,ENSG00000157168,ENSG00000176884,ENSG00000148660,ENSG00000150672,ENSG00000154146,ENSG00000273079,ENSG00000198668,ENSG00000183454,ENSG00000132535,ENSG00000105464,ENSG00000197122,ENSG00000082458
REAC	Opioid Signalling	REAC:R-HSA-111885	4.85809e-06	5.31353	90	3075	52	10622	ENSG00000078369,ENSG00000142875,ENSG00000168243,ENSG00000115138,ENSG00000221823,ENSG00000115252,ENSG00000118260,ENSG00000150995,ENSG00000114302,ENSG00000163932,ENSG00000173175,ENSG00000138814,ENSG00000145349,ENSG00000152495,ENSG00000113575,ENSG00000070808,ENSG00000112640,ENSG00000188191,ENSG00000058404,ENSG00000164742,ENSG00000005249,ENSG00000164885,ENSG00000242616,ENSG00000107758,ENSG00000148660…
REAC	Unblocking of NMDA receptors, glutamate binding and activation	REAC:R-HSA-438066	9.78584e-06	5.0094	20	3075	18	10622	ENSG00000077522,ENSG00000145349,ENSG00000120251,ENSG00000070808,ENSG00000155511,ENSG00000058404,ENSG00000277586,ENSG00000176884,ENSG00000148660,ENSG00000150672,ENSG00000152578,ENSG00000273079,ENSG00000198668,ENSG00000183454,ENSG00000132535,ENSG00000105464,ENSG00000082458,ENSG00000125675
REAC	Glutamate binding, activation of AMPA receptors and synaptic plasticity	REAC:R-HSA-399721	1.08585e-05	4.96423	27	3075	22	10622	ENSG00000144596,ENSG00000145349,ENSG00000120251,ENSG00000070808,ENSG00000155511,ENSG00000058404,ENSG00000148660,ENSG00000152578,ENSG00000155974,ENSG00000179841,ENSG00000166501,ENSG00000006116,ENSG00000132535,ENSG00000073969,ENSG00000075461,ENSG00000196961,ENSG00000126583,ENSG00000142408,ENSG00000088367,ENSG00000166862,ENSG00000156298,ENSG00000125675
REAC	Trafficking of AMPA receptors	REAC:R-HSA-399719	1.08585e-05	4.96423	27	3075	22	10622	ENSG00000144596,ENSG00000145349,ENSG00000120251,ENSG00000070808,ENSG00000155511,ENSG00000058404,ENSG00000148660,ENSG00000152578,ENSG00000155974,ENSG00000179841,ENSG00000166501,ENSG00000006116,ENSG00000132535,ENSG00000073969,ENSG00000075461,ENSG00000196961,ENSG00000126583,ENSG00000142408,ENSG00000088367,ENSG00000166862,ENSG00000156298,ENSG00000125675
REAC	Dopamine Neurotransmitter Release Cycle	REAC:R-HSA-212676	1.65837e-05	4.78032	22	3075	19	10622	ENSG00000143847,ENSG00000157152,ENSG00000168993,ENSG00000079841,ENSG00000106089,ENSG00000198722,ENSG00000107282,ENSG00000067715,ENSG00000111052,ENSG00000139220,ENSG00000220205,ENSG00000005379,ENSG00000105649,ENSG00000104863,ENSG00000177380,ENSG00000132639,ENSG00000185666,ENSG00000147044,ENSG00000008056
REAC	Neurotransmitter release cycle	REAC:R-HSA-112310	2.89692e-05	4.53806	50	3075	33	10622	ENSG00000143847,ENSG00000128683,ENSG00000115419,ENSG00000157103,ENSG00000157152,ENSG00000144746,ENSG00000168993,ENSG00000138744,ENSG00000079841,ENSG00000106089,ENSG00000106688,ENSG00000198722,ENSG00000107282,ENSG00000136750,ENSG00000109971,ENSG00000135423,ENSG00000067715,ENSG00000111052,ENSG00000139220,ENSG00000183044,ENSG00000220205,ENSG00000005379,ENSG00000105143,ENSG00000105649,ENSG00000104863…
REAC	Signaling by NTRKs	REAC:R-HSA-166520	5.79465e-05	4.23697	130	3075	66	10622	ENSG00000134259,ENSG00000116604,ENSG00000198400,ENSG00000197959,ENSG00000115738,ENSG00000135625,ENSG00000144118,ENSG00000138386,ENSG00000118260,ENSG00000171450,ENSG00000169047,ENSG00000088538,ENSG00000051382,ENSG00000161203,ENSG00000145675,ENSG00000081189,ENSG00000113575,ENSG00000120738,ENSG00000112062,ENSG00000156711,ENSG00000137218,ENSG00000112640,ENSG00000128564,ENSG00000157764,ENSG00000164885…
REAC	Assembly and cell surface presentation of NMDA receptors	REAC:R-HSA-9609736	9.14343e-05	4.03889	43	3075	29	10622	ENSG00000117245,ENSG00000077522,ENSG00000075886,ENSG00000127824,ENSG00000145349,ENSG00000070808,ENSG00000137267,ENSG00000058404,ENSG00000277586,ENSG00000107282,ENSG00000198785,ENSG00000176884,ENSG00000188229,ENSG00000261456,ENSG00000148660,ENSG00000150672,ENSG00000273079,ENSG00000123416,ENSG00000111052,ENSG00000172915,ENSG00000183454,ENSG00000258947,ENSG00000132535,ENSG00000104833,ENSG00000105464…
REAC	Signaling by NTRK1 (TRKA)	REAC:R-HSA-187037	0.00014051	3.85229	112	3075	58	10622	ENSG00000134259,ENSG00000116604,ENSG00000198400,ENSG00000197959,ENSG00000115738,ENSG00000135625,ENSG00000144118,ENSG00000138386,ENSG00000118260,ENSG00000171450,ENSG00000169047,ENSG00000051382,ENSG00000161203,ENSG00000145675,ENSG00000081189,ENSG00000113575,ENSG00000120738,ENSG00000112062,ENSG00000156711,ENSG00000112640,ENSG00000128564,ENSG00000157764,ENSG00000164885,ENSG00000179388,ENSG00000120875…
REAC	Negative regulation of NMDA receptor-mediated neuronal transmission	REAC:R-HSA-9617324	0.000148613	3.82794	20	3075	17	10622	ENSG00000077522,ENSG00000145349,ENSG00000152495,ENSG00000070808,ENSG00000058404,ENSG00000277586,ENSG00000176884,ENSG00000148660,ENSG00000150672,ENSG00000273079,ENSG00000198668,ENSG00000183454,ENSG00000132535,ENSG00000175175,ENSG00000105464,ENSG00000100034,ENSG00000082458
REAC	Regulation of insulin secretion	REAC:R-HSA-422356	0.000169735	3.77023	78	3075	44	10622	ENSG00000078369,ENSG00000142875,ENSG00000198216,ENSG00000168243,ENSG00000170745,ENSG00000091428,ENSG00000123983,ENSG00000150995,ENSG00000114302,ENSG00000007402,ENSG00000157388,ENSG00000173175,ENSG00000184160,ENSG00000277443,ENSG00000188191,ENSG00000106089,ENSG00000005249,ENSG00000242616,ENSG00000136854,ENSG00000165995,ENSG00000150594,ENSG00000187486,ENSG00000006071,ENSG00000162188,ENSG00000151067…
REAC	Muscle contraction	REAC:R-HSA-397014	0.000225154	3.64752	195	3075	89	10622	ENSG00000175206,ENSG00000171385,ENSG00000163399,ENSG00000143549,ENSG00000143318,ENSG00000143153,ENSG00000058668,ENSG00000082482,ENSG00000135750,ENSG00000077522,ENSG00000198626,ENSG00000119782,ENSG00000171303,ENSG00000183023,ENSG00000184261,ENSG00000115041,ENSG00000183091,ENSG00000153253,ENSG00000136531,ENSG00000144285,ENSG00000169432,ENSG00000136546,ENSG00000163273,ENSG00000150995,ENSG00000157087…
REAC	CREB1 phosphorylation through NMDA receptor-mediated activation of RAS signaling	REAC:R-HSA-442742	0.00027323	3.56347	26	3075	20	10622	ENSG00000077522,ENSG00000118260,ENSG00000145349,ENSG00000070808,ENSG00000058404,ENSG00000277586,ENSG00000176884,ENSG00000148660,ENSG00000150672,ENSG00000273079,ENSG00000198668,ENSG00000058335,ENSG00000140992,ENSG00000102882,ENSG00000132535,ENSG00000105464,ENSG00000100030,ENSG00000177189,ENSG00000082458,ENSG00000072133
REAC	Serotonin Neurotransmitter Release Cycle	REAC:R-HSA-181429	0.000294125	3.53147	17	3075	15	10622	ENSG00000143847,ENSG00000157152,ENSG00000168993,ENSG00000079841,ENSG00000106089,ENSG00000198722,ENSG00000067715,ENSG00000139220,ENSG00000220205,ENSG00000005379,ENSG00000105649,ENSG00000177380,ENSG00000132639,ENSG00000185666,ENSG00000008056
REAC	Nervous system development	REAC:R-HSA-9675108	0.000328836	3.48302	574	3075	219	10622	ENSG00000076864,ENSG00000070886,ENSG00000133216,ENSG00000126067,ENSG00000183317,ENSG00000185668,ENSG00000131236,ENSG00000117461,ENSG00000173406,ENSG00000142875,ENSG00000134215,ENSG00000265241,ENSG00000143590,ENSG00000196189,ENSG00000132694,ENSG00000197959,ENSG00000143322,ENSG00000076356,ENSG00000143801,ENSG00000134318,ENSG00000157851,ENSG00000071051,ENSG00000115091,ENSG00000074054,ENSG00000075886…
REAC	Integration of energy metabolism	REAC:R-HSA-163685	0.00038735	3.4119	107	3075	55	10622	ENSG00000078369,ENSG00000162409,ENSG00000142875,ENSG00000198216,ENSG00000168243,ENSG00000170745,ENSG00000091428,ENSG00000123983,ENSG00000150995,ENSG00000114302,ENSG00000007402,ENSG00000157388,ENSG00000173175,ENSG00000184160,ENSG00000113575,ENSG00000112640,ENSG00000277443,ENSG00000188191,ENSG00000164742,ENSG00000106089,ENSG00000005249,ENSG00000106617,ENSG00000242616,ENSG00000136854,ENSG00000165995…
REAC	Presynaptic depolarization and calcium channel opening	REAC:R-HSA-112308	0.00058499	3.23285	11	3075	11	10622	ENSG00000198216,ENSG00000182389,ENSG00000007402,ENSG00000157445,ENSG00000148408,ENSG00000165995,ENSG00000167535,ENSG00000067191,ENSG00000075461,ENSG00000141837,ENSG00000166862
REAC	Ca-dependent events	REAC:R-HSA-111996	0.000617264	3.20953	37	3075	25	10622	ENSG00000142875,ENSG00000115252,ENSG00000118260,ENSG00000114302,ENSG00000163932,ENSG00000173175,ENSG00000145349,ENSG00000152495,ENSG00000070808,ENSG00000188191,ENSG00000058404,ENSG00000164742,ENSG00000005249,ENSG00000148660,ENSG00000173020,ENSG00000123360,ENSG00000110931,ENSG00000172915,ENSG00000198668,ENSG00000162104,ENSG00000004660,ENSG00000182481,ENSG00000072062,ENSG00000126583,ENSG00000100030
REAC	Glutamate Neurotransmitter Release Cycle	REAC:R-HSA-210500	0.000667846	3.17532	23	3075	18	10622	ENSG00000143847,ENSG00000115419,ENSG00000144746,ENSG00000168993,ENSG00000079841,ENSG00000106089,ENSG00000106688,ENSG00000198722,ENSG00000135423,ENSG00000067715,ENSG00000139220,ENSG00000220205,ENSG00000005379,ENSG00000105143,ENSG00000105649,ENSG00000177380,ENSG00000104888,ENSG00000132639
REAC	CaM pathway	REAC:R-HSA-111997	0.00067067	3.17349	35	3075	24	10622	ENSG00000142875,ENSG00000115252,ENSG00000118260,ENSG00000114302,ENSG00000163932,ENSG00000173175,ENSG00000145349,ENSG00000152495,ENSG00000070808,ENSG00000188191,ENSG00000058404,ENSG00000164742,ENSG00000005249,ENSG00000148660,ENSG00000173020,ENSG00000123360,ENSG00000110931,ENSG00000172915,ENSG00000198668,ENSG00000162104,ENSG00000004660,ENSG00000182481,ENSG00000072062,ENSG00000126583
REAC	Calmodulin induced events	REAC:R-HSA-111933	0.00067067	3.17349	35	3075	24	10622	ENSG00000142875,ENSG00000115252,ENSG00000118260,ENSG00000114302,ENSG00000163932,ENSG00000173175,ENSG00000145349,ENSG00000152495,ENSG00000070808,ENSG00000188191,ENSG00000058404,ENSG00000164742,ENSG00000005249,ENSG00000148660,ENSG00000173020,ENSG00000123360,ENSG00000110931,ENSG00000172915,ENSG00000198668,ENSG00000162104,ENSG00000004660,ENSG00000182481,ENSG00000072062,ENSG00000126583
REAC	Axon guidance	REAC:R-HSA-422475	0.000715666	3.14529	549	3075	209	10622	ENSG00000076864,ENSG00000070886,ENSG00000133216,ENSG00000126067,ENSG00000183317,ENSG00000131236,ENSG00000117461,ENSG00000173406,ENSG00000142875,ENSG00000134215,ENSG00000265241,ENSG00000143590,ENSG00000196189,ENSG00000132694,ENSG00000197959,ENSG00000143322,ENSG00000076356,ENSG00000143801,ENSG00000134318,ENSG00000157851,ENSG00000071051,ENSG00000115091,ENSG00000074054,ENSG00000075886,ENSG00000182389…
REAC	Platelet homeostasis	REAC:R-HSA-418346	0.00136371	2.86528	85	3075	45	10622	ENSG00000078369,ENSG00000157193,ENSG00000058668,ENSG00000168243,ENSG00000183023,ENSG00000115252,ENSG00000150995,ENSG00000157087,ENSG00000197584,ENSG00000138741,ENSG00000164116,ENSG00000061918,ENSG00000113575,ENSG00000112062,ENSG00000112640,ENSG00000112541,ENSG00000160991,ENSG00000242616,ENSG00000156113,ENSG00000167323,ENSG00000162188,ENSG00000068971,ENSG00000186642,ENSG00000137672,ENSG00000152402…
REAC	Ion homeostasis	REAC:R-HSA-5578775	0.00158996	2.79861	54	3075	32	10622	ENSG00000163399,ENSG00000143318,ENSG00000143153,ENSG00000058668,ENSG00000198626,ENSG00000119782,ENSG00000183023,ENSG00000150995,ENSG00000157087,ENSG00000069849,ENSG00000145349,ENSG00000070808,ENSG00000058404,ENSG00000160991,ENSG00000148660,ENSG00000167323,ENSG00000187486,ENSG00000170290,ENSG00000137731,ENSG00000137726,ENSG00000070961,ENSG00000174437,ENSG00000089250,ENSG00000100678,ENSG00000198668…
REAC	Neurotoxicity of clostridium toxins	REAC:R-HSA-168799	0.00202542	2.69348	10	3075	10	10622	ENSG00000159164,ENSG00000143858,ENSG00000122012,ENSG00000106089,ENSG00000139190,ENSG00000067715,ENSG00000185518,ENSG00000099365,ENSG00000220205,ENSG00000132639
REAC	CaMK IV-mediated phosphorylation of CREB	REAC:R-HSA-111932	0.00202542	2.69348	10	3075	10	10622	ENSG00000118260,ENSG00000145349,ENSG00000152495,ENSG00000070808,ENSG00000058404,ENSG00000148660,ENSG00000110931,ENSG00000198668,ENSG00000004660,ENSG00000182481
REAC	DAG and IP3 signaling	REAC:R-HSA-1489509	0.00230061	2.63816	41	3075	26	10622	ENSG00000142875,ENSG00000171132,ENSG00000115252,ENSG00000118260,ENSG00000150995,ENSG00000114302,ENSG00000163932,ENSG00000173175,ENSG00000145349,ENSG00000152495,ENSG00000070808,ENSG00000188191,ENSG00000058404,ENSG00000164742,ENSG00000005249,ENSG00000148660,ENSG00000173020,ENSG00000123360,ENSG00000110931,ENSG00000172915,ENSG00000198668,ENSG00000162104,ENSG00000004660,ENSG00000182481,ENSG00000072062…
REAC	Interaction between L1 and Ankyrins	REAC:R-HSA-445095	0.00420667	2.37606	31	3075	21	10622	ENSG00000153253,ENSG00000136531,ENSG00000144285,ENSG00000169432,ENSG00000136546,ENSG00000183873,ENSG00000145362,ENSG00000091129,ENSG00000029534,ENSG00000184156,ENSG00000197694,ENSG00000173898,ENSG00000177098,ENSG00000149575,ENSG00000166257,ENSG00000196876,ENSG00000070182,ENSG00000007314,ENSG00000160460,ENSG00000075043,ENSG00000198910
REAC	G-protein mediated events	REAC:R-HSA-112040	0.00562141	2.25015	54	3075	31	10622	ENSG00000142875,ENSG00000115252,ENSG00000118260,ENSG00000150995,ENSG00000114302,ENSG00000163932,ENSG00000173175,ENSG00000145349,ENSG00000152495,ENSG00000070808,ENSG00000188191,ENSG00000058404,ENSG00000164742,ENSG00000005249,ENSG00000148660,ENSG00000173020,ENSG00000123360,ENSG00000110931,ENSG00000172915,ENSG00000198668,ENSG00000162104,ENSG00000087258,ENSG00000004660,ENSG00000182481,ENSG00000141404…
REAC	LGI-ADAM interactions	REAC:R-HSA-5682910	0.00827695	2.08213	14	3075	12	10622	ENSG00000114948,ENSG00000153012,ENSG00000106089,ENSG00000008277,ENSG00000108231,ENSG00000006116,ENSG00000099365,ENSG00000132535,ENSG00000073670,ENSG00000075461,ENSG00000142408,ENSG00000166862
REAC	PLC beta mediated events	REAC:R-HSA-112043	0.01134	1.94539	53	3075	30	10622	ENSG00000142875,ENSG00000115252,ENSG00000118260,ENSG00000150995,ENSG00000114302,ENSG00000163932,ENSG00000173175,ENSG00000145349,ENSG00000152495,ENSG00000070808,ENSG00000188191,ENSG00000058404,ENSG00000164742,ENSG00000005249,ENSG00000148660,ENSG00000173020,ENSG00000123360,ENSG00000110931,ENSG00000172915,ENSG00000198668,ENSG00000162104,ENSG00000087258,ENSG00000004660,ENSG00000182481,ENSG00000072062…
REAC	Ras activation upon Ca2+ influx through NMDA receptor	REAC:R-HSA-442982	0.0123201	1.90938	18	3075	14	10622	ENSG00000077522,ENSG00000145349,ENSG00000070808,ENSG00000058404,ENSG00000277586,ENSG00000176884,ENSG00000148660,ENSG00000150672,ENSG00000273079,ENSG00000198668,ENSG00000058335,ENSG00000132535,ENSG00000105464,ENSG00000082458
REAC	GABA synthesis, release, reuptake and degradation	REAC:R-HSA-888590	0.0123201	1.90938	18	3075	14	10622	ENSG00000128683,ENSG00000157103,ENSG00000168993,ENSG00000079841,ENSG00000106089,ENSG00000136750,ENSG00000109971,ENSG00000067715,ENSG00000183044,ENSG00000220205,ENSG00000105649,ENSG00000132639,ENSG00000101438,ENSG00000101152
REAC	Post-translational protein modification	REAC:R-HSA-597592	0.0223983	1.64978	1415	3075	473	10622	ENSG00000116237,ENSG00000142655,ENSG00000116661,ENSG00000132879,ENSG00000169914,ENSG00000090432,ENSG00000090686,ENSG00000179163,ENSG00000117643,ENSG00000117682,ENSG00000142784,ENSG00000126067,ENSG00000126091,ENSG00000132768,ENSG00000186094,ENSG00000169213,ENSG00000058804,ENSG00000172260,ENSG00000254685,ENSG00000117069,ENSG00000162631,ENSG00000198162,ENSG00000265808,ENSG00000143315,ENSG00000122218…
REAC	CREB1 phosphorylation through the activation of CaMKII/CaMKK/CaMKIV cascasde	REAC:R-HSA-442729	0.0242631	1.61505	8	3075	8	10622	ENSG00000118260,ENSG00000152495,ENSG00000058404,ENSG00000148660,ENSG00000110931,ENSG00000198668,ENSG00000004660,ENSG00000182481
REAC	Asparagine N-linked glycosylation	REAC:R-HSA-446203	0.0244341	1.612	305	3075	120	10622	ENSG00000179163,ENSG00000117643,ENSG00000117682,ENSG00000126091,ENSG00000254685,ENSG00000117069,ENSG00000198162,ENSG00000265808,ENSG00000122218,ENSG00000158850,ENSG00000120341,ENSG00000196352,ENSG00000154305,ENSG00000143786,ENSG00000143761,ENSG00000180398,ENSG00000198380,ENSG00000124357,ENSG00000204843,ENSG00000115525,ENSG00000115526,ENSG00000075886,ENSG00000152127,ENSG00000127824,ENSG00000134109…
REAC	Trafficking of GluR2-containing AMPA receptors	REAC:R-HSA-416993	0.0246922	1.60744	13	3075	11	10622	ENSG00000144596,ENSG00000120251,ENSG00000155511,ENSG00000152578,ENSG00000155974,ENSG00000166501,ENSG00000073969,ENSG00000196961,ENSG00000126583,ENSG00000156298,ENSG00000125675
REAC	Membrane Trafficking	REAC:R-HSA-199991	0.0249268	1.60333	625	3075	225	10622	ENSG00000117643,ENSG00000175793,ENSG00000189280,ENSG00000188910,ENSG00000142945,ENSG00000085832,ENSG00000162409,ENSG00000116675,ENSG00000118473,ENSG00000137942,ENSG00000134262,ENSG00000198162,ENSG00000265808,ENSG00000136631,ENSG00000198837,ENSG00000132718,ENSG00000122218,ENSG00000075945,ENSG00000117533,ENSG00000197959,ENSG00000120341,ENSG00000135823,ENSG00000213047,ENSG00000116852,ENSG00000143858…
REAC	Uptake and actions of bacterial toxins	REAC:R-HSA-5339562	0.0290803	1.5364	25	3075	17	10622	ENSG00000159164,ENSG00000143858,ENSG00000122012,ENSG00000096384,ENSG00000106089,ENSG00000139190,ENSG00000067715,ENSG00000198431,ENSG00000198668,ENSG00000080824,ENSG00000169032,ENSG00000185518,ENSG00000099365,ENSG00000220205,ENSG00000065559,ENSG00000167658,ENSG00000132639
REAC	GABA receptor activation	REAC:R-HSA-977443	0.0304202	1.51684	60	3075	32	10622	ENSG00000078369,ENSG00000162728,ENSG00000168243,ENSG00000162989,ENSG00000173175,ENSG00000109158,ENSG00000145864,ENSG00000145863,ENSG00000022355,ENSG00000113327,ENSG00000204681,ENSG00000164742,ENSG00000136928,ENSG00000242616,ENSG00000162188,ENSG00000111664,ENSG00000186469,ENSG00000166206,ENSG00000186297,ENSG00000182256,ENSG00000069966,ENSG00000156642,ENSG00000127588,ENSG00000162104,ENSG00000184185…
REAC	PI Metabolism	REAC:R-HSA-1483255	0.0317588	1.49814	83	3075	41	10622	ENSG00000117461,ENSG00000143850,ENSG00000143761,ENSG00000168118,ENSG00000040933,ENSG00000211456,ENSG00000196455,ENSG00000051382,ENSG00000109452,ENSG00000150712,ENSG00000145675,ENSG00000112367,ENSG00000106086,ENSG00000104643,ENSG00000003987,ENSG00000107242,ENSG00000119396,ENSG00000130653,ENSG00000155252,ENSG00000198825,ENSG00000107679,ENSG00000158555,ENSG00000052126,ENSG00000134287,ENSG00000166908…
REAC	Synaptic adhesion-like molecules	REAC:R-HSA-8849932	0.0334941	1.47503	21	3075	15	10622	ENSG00000155511,ENSG00000156564,ENSG00000176884,ENSG00000133318,ENSG00000152578,ENSG00000273079,ENSG00000183454,ENSG00000132535,ENSG00000132589,ENSG00000105426,ENSG00000126243,ENSG00000128011,ENSG00000105464,ENSG00000082458,ENSG00000125675
REAC	Activation of kainate receptors upon glutamate binding	REAC:R-HSA-451326	0.0463614	1.33384	30	3075	19	10622	ENSG00000078369,ENSG00000163873,ENSG00000168243,ENSG00000164418,ENSG00000104490,ENSG00000242616,ENSG00000162188,ENSG00000149403,ENSG00000111664,ENSG00000186469,ENSG00000198668,ENSG00000069966,ENSG00000127588,ENSG00000132535,ENSG00000176533,ENSG00000105737,ENSG00000182621,ENSG00000171189,ENSG00000082458
WP	Calcium Regulation in the Cardiac Cell	WP:WP536	4.51986e-12	11.3449	151	2092	86	7562	ENSG00000078369,ENSG00000067606,ENSG00000175793,ENSG00000189280,ENSG00000188910,ENSG00000142875,ENSG00000143318,ENSG00000117152,ENSG00000143153,ENSG00000198216,ENSG00000143333,ENSG00000116741,ENSG00000168243,ENSG00000198626,ENSG00000182901,ENSG00000183023,ENSG00000171132,ENSG00000162989,ENSG00000150995,ENSG00000157087,ENSG00000114302,ENSG00000163932,ENSG00000157388,ENSG00000173175,ENSG00000069849…
WP	Fragile X Syndrome	WP:WP4549	2.70673e-09	8.56756	122	2092	69	7562	ENSG00000187730,ENSG00000198793,ENSG00000076864,ENSG00000116544,ENSG00000128683,ENSG00000118260,ENSG00000116106,ENSG00000150995,ENSG00000157103,ENSG00000144596,ENSG00000051382,ENSG00000161203,ENSG00000138814,ENSG00000120251,ENSG00000164588,ENSG00000131711,ENSG00000152413,ENSG00000152495,ENSG00000070808,ENSG00000155511,ENSG00000055163,ENSG00000145864,ENSG00000022355,ENSG00000113327,ENSG00000145979…
WP	Brain-Derived Neurotrophic Factor (BDNF) signaling pathway	WP:WP2380	7.79285e-09	8.1083	144	2092	77	7562	ENSG00000198793,ENSG00000162409,ENSG00000177606,ENSG00000134215,ENSG00000177272,ENSG00000134259,ENSG00000198400,ENSG00000071051,ENSG00000115415,ENSG00000118260,ENSG00000169047,ENSG00000168036,ENSG00000088538,ENSG00000163932,ENSG00000082701,ENSG00000158092,ENSG00000120251,ENSG00000145675,ENSG00000081189,ENSG00000152495,ENSG00000134982,ENSG00000080709,ENSG00000113575,ENSG00000120738,ENSG00000070808…
WP	Disruption of postsynaptic signalling by CNV	WP:WP4875	9.45134e-08	7.02451	34	2092	27	7562	ENSG00000198626,ENSG00000179915,ENSG00000169760,ENSG00000145349,ENSG00000152413,ENSG00000070808,ENSG00000197283,ENSG00000152822,ENSG00000058404,ENSG00000106089,ENSG00000170027,ENSG00000198576,ENSG00000176884,ENSG00000148660,ENSG00000110076,ENSG00000150672,ENSG00000273079,ENSG00000089169,ENSG00000021645,ENSG00000183454,ENSG00000102882,ENSG00000169992,ENSG00000170579,ENSG00000105464,ENSG00000161681…
WP	Synaptic Vesicle Pathway	WP:WP2267	9.61882e-08	7.01688	52	2092	36	7562	ENSG00000197959,ENSG00000157152,ENSG00000161203,ENSG00000168993,ENSG00000151729,ENSG00000145920,ENSG00000079841,ENSG00000106089,ENSG00000198722,ENSG00000136854,ENSG00000106976,ENSG00000148408,ENSG00000183020,ENSG00000087470,ENSG00000111371,ENSG00000067715,ENSG00000137766,ENSG00000213578,ENSG00000099365,ENSG00000220205,ENSG00000108576,ENSG00000006125,ENSG00000073969,ENSG00000141367,ENSG00000141837…
WP	Splicing factor NOVA regulated synaptic proteins	WP:WP4148	8.55191e-07	6.06794	42	2092	30	7562	ENSG00000067606,ENSG00000171603,ENSG00000076864,ENSG00000159023,ENSG00000020129,ENSG00000173406,ENSG00000162631,ENSG00000162706,ENSG00000074054,ENSG00000134121,ENSG00000184349,ENSG00000113327,ENSG00000050748,ENSG00000164418,ENSG00000136928,ENSG00000176884,ENSG00000148660,ENSG00000156113,ENSG00000182985,ENSG00000084234,ENSG00000273079,ENSG00000070961,ENSG00000171723,ENSG00000082397,ENSG00000170558…
WP	GABA receptor Signaling	WP:WP4159	0.000117094	3.93147	33	2092	23	7562	ENSG00000187730,ENSG00000128683,ENSG00000157103,ENSG00000161203,ENSG00000109158,ENSG00000145864,ENSG00000145863,ENSG00000022355,ENSG00000113327,ENSG00000204681,ENSG00000136928,ENSG00000136750,ENSG00000183020,ENSG00000171723,ENSG00000166206,ENSG00000186297,ENSG00000182256,ENSG00000183044,ENSG00000006125,ENSG00000196961,ENSG00000101438,ENSG00000011677,ENSG00000268089
WP	Rett syndrome causing genes	WP:WP4312	0.000171076	3.76681	49	2092	30	7562	ENSG00000187730,ENSG00000117139,ENSG00000115750,ENSG00000136531,ENSG00000144285,ENSG00000119042,ENSG00000177565,ENSG00000197386,ENSG00000081189,ENSG00000197283,ENSG00000010818,ENSG00000177679,ENSG00000077080,ENSG00000157764,ENSG00000008853,ENSG00000080503,ENSG00000136928,ENSG00000136854,ENSG00000273079,ENSG00000196876,ENSG00000183454,ENSG00000087258,ENSG00000167193,ENSG00000173805,ENSG00000108840…
WP	Synaptic signaling pathways associated with autism spectrum disorder	WP:WP4539	0.00208726	2.68042	51	2092	29	7562	ENSG00000198793,ENSG00000117461,ENSG00000162409,ENSG00000117020,ENSG00000082701,ENSG00000051382,ENSG00000145675,ENSG00000152413,ENSG00000152495,ENSG00000197283,ENSG00000152822,ENSG00000058404,ENSG00000106617,ENSG00000198576,ENSG00000198785,ENSG00000165699,ENSG00000176884,ENSG00000151067,ENSG00000273079,ENSG00000133703,ENSG00000183454,ENSG00000102882,ENSG00000132535,ENSG00000196712,ENSG00000141564…
WP	Common Pathways Underlying Drug Addiction	WP:WP2636	0.00286062	2.54354	42	2092	25	7562	ENSG00000142875,ENSG00000118260,ENSG00000120251,ENSG00000152495,ENSG00000070808,ENSG00000155511,ENSG00000184845,ENSG00000152822,ENSG00000164742,ENSG00000176884,ENSG00000172531,ENSG00000168959,ENSG00000152578,ENSG00000149295,ENSG00000135447,ENSG00000198668,ENSG00000169032,ENSG00000183454,ENSG00000166501,ENSG00000102882,ENSG00000072062,ENSG00000126583,ENSG00000087460,ENSG00000100030,ENSG00000125675
WP	G Protein Signaling Pathways	WP:WP35	0.00430855	2.36567	94	2092	45	7562	ENSG00000078369,ENSG00000067606,ENSG00000090020,ENSG00000142875,ENSG00000168243,ENSG00000171132,ENSG00000162989,ENSG00000115252,ENSG00000150995,ENSG00000114302,ENSG00000163932,ENSG00000173175,ENSG00000163558,ENSG00000138814,ENSG00000118507,ENSG00000171408,ENSG00000188191,ENSG00000164742,ENSG00000005249,ENSG00000242616,ENSG00000162188,ENSG00000111664,ENSG00000133703,ENSG00000123360,ENSG00000023516…
WP	Myometrial Relaxation and Contraction Pathways	WP:WP289	0.00779823	2.108	155	2092	66	7562	ENSG00000078369,ENSG00000067606,ENSG00000175793,ENSG00000177606,ENSG00000142875,ENSG00000117152,ENSG00000143333,ENSG00000116741,ENSG00000168243,ENSG00000198626,ENSG00000182901,ENSG00000183023,ENSG00000171132,ENSG00000118260,ENSG00000115461,ENSG00000150995,ENSG00000114302,ENSG00000163932,ENSG00000173175,ENSG00000125388,ENSG00000145244,ENSG00000145349,ENSG00000164116,ENSG00000070808,ENSG00000169220…
WP	Monoamine GPCRs	WP:WP58	0.0145367	1.83753	33	2092	20	7562	ENSG00000179546,ENSG00000274286,ENSG00000179097,ENSG00000184160,ENSG00000170214,ENSG00000184845,ENSG00000113749,ENSG00000135312,ENSG00000168830,ENSG00000181072,ENSG00000157219,ENSG00000148680,ENSG00000150594,ENSG00000180720,ENSG00000168539,ENSG00000149295,ENSG00000102468,ENSG00000184984,ENSG00000171873,ENSG00000147246
WP	PKC-gamma calcium signaling pathway in ataxia	WP:WP4760	0.0173566	1.76053	22	2092	15	7562	ENSG00000150995,ENSG00000157087,ENSG00000138741,ENSG00000120251,ENSG00000155511,ENSG00000152822,ENSG00000178538,ENSG00000152578,ENSG00000088256,ENSG00000141837,ENSG00000051128,ENSG00000126583,ENSG00000182621,ENSG00000101333,ENSG00000125675
WP	Parkin-Ubiquitin Proteasomal System pathway	WP:WP2359	0.0298535	1.525	70	2092	34	7562	ENSG00000075886,ENSG00000127824,ENSG00000181788,ENSG00000175166,ENSG00000145335,ENSG00000109670,ENSG00000170606,ENSG00000137267,ENSG00000196230,ENSG00000204390,ENSG00000198833,ENSG00000185345,ENSG00000055130,ENSG00000044574,ENSG00000188229,ENSG00000261456,ENSG00000187522,ENSG00000185627,ENSG00000109971,ENSG00000123416,ENSG00000100764,ENSG00000103035,ENSG00000258947,ENSG00000132388,ENSG00000108671…
WP	Circadian rhythm related genes	WP:WP3594	0.0316908	1.49907	206	2092	81	7562	ENSG00000121764,ENSG00000162409,ENSG00000177606,ENSG00000143125,ENSG00000159208,ENSG00000160716,ENSG00000198400,ENSG00000135829,ENSG00000115738,ENSG00000134318,ENSG00000138083,ENSG00000198380,ENSG00000170485,ENSG00000118260,ENSG00000132326,ENSG00000174738,ENSG00000082701,ENSG00000169760,ENSG00000109819,ENSG00000134852,ENSG00000138668,ENSG00000151014,ENSG00000066230,ENSG00000152413,ENSG00000120738…
WP	ErbB Signaling Pathway	WP:WP673	0.0394973	1.40343	90	2092	41	7562	ENSG00000198793,ENSG00000117461,ENSG00000177606,ENSG00000143322,ENSG00000117020,ENSG00000071051,ENSG00000178568,ENSG00000114423,ENSG00000082701,ENSG00000158092,ENSG00000051382,ENSG00000145349,ENSG00000145675,ENSG00000070808,ENSG00000050748,ENSG00000058404,ENSG00000157764,ENSG00000157168,ENSG00000148082,ENSG00000107643,ENSG00000148660,ENSG00000149269,ENSG00000111276,ENSG00000133703,ENSG00000137843…
TF	Factor: ZF5; motif: GSGCGCGR; match class: 1	TF:M00716_1	1.53135e-125	124.815	14230	5693	4740	19917	ENSG00000188976,ENSG00000186891,ENSG00000176022,ENSG00000107404,ENSG00000205090,ENSG00000160075,ENSG00000228594,ENSG00000189339,ENSG00000078369,ENSG00000187730,ENSG00000067606,ENSG00000157933,ENSG00000116151,ENSG00000157881,ENSG00000197921,ENSG00000157870,ENSG00000158109,ENSG00000130764,ENSG00000169598,ENSG00000198912,ENSG00000196581,ENSG00000131697,ENSG00000069424,ENSG00000116254,ENSG00000158286…
198576	ENSG00000167653	ENSG00000160886	ENSG00000130193	ENSG00000180155	ENSG00000160932	ENSG00000176956	ENSG00000104524	ENSG00000183309	ENSG00000181135	ENSG00000180921	ENSG00000178719	ENSG00000179832	ENSG00000260428	ENSG00000261678	ENSG00000147804	ENSG00000167702	ENSG00000160973	ENSG00000160972	ENSG00000167700	ENSG00000160959	ENSG00000170122	ENSG00000080503	ENSG00000147852	ENSG00000168263	ENSG00000106688	ENSG00000205808	ENSG00000153714	ENSG00000175893	ENSG00000155158	ENSG00000164975	ENSG00000107295	ENSG00000155876	ENSG00000171843	ENSG00000198642	ENSG00000147889	ENSG00000198680	ENSG00000137055	ENSG00000086061	ENSG00000165269	ENSG00000165272	ENSG00000010438	ENSG00000107341	ENSG00000137073	ENSG00000165006	ENSG00000205143	ENSG00000213930	ENSG00000122733	ENSG00000137094	ENSG00000165280
TF	Factor: ZF5; motif: GGSGCGCGS; match class: 1	TF:M10438_1	5.88202e-117	116.23	15001	5693	4904	19917	ENSG00000188976,ENSG00000186891,ENSG00000176022,ENSG00000107404,ENSG00000205090,ENSG00000160075,ENSG00000228594,ENSG00000189339,ENSG00000078369,ENSG00000187730,ENSG00000067606,ENSG00000157933,ENSG00000116151,ENSG00000157881,ENSG00000197921,ENSG00000157870,ENSG00000142606,ENSG00000158109,ENSG00000130764,ENSG00000169598,ENSG00000198912,ENSG00000196581,ENSG00000131697,ENSG00000069424,ENSG00000116254…
137575	ENSG00000035681	ENSG00000178538	ENSG00000177182	ENSG00000137563	ENSG00000180828	ENSG00000172817	ENSG00000178460	ENSG00000221947	ENSG00000178860	ENSG00000040341	ENSG00000104343	ENSG00000175606	ENSG00000104369	ENSG00000104381	ENSG00000104427	ENSG00000104435	ENSG00000164683	ENSG00000133731	ENSG00000104231	ENSG00000104497	ENSG00000184672	ENSG00000185015	ENSG00000123124	ENSG00000164823	ENSG00000104327	ENSG00000123119	ENSG00000079102	ENSG00000188343	ENSG00000164951	ENSG00000156170	ENSG00000156471	ENSG00000180543	ENSG00000147649	ENSG00000104341	ENSG00000177459	ENSG00000104356	ENSG00000104361	ENSG00000156486	ENSG00000164924	ENSG00000120963	ENSG00000155096	ENSG00000155097	ENSG00000176406	ENSG00000147650	ENSG00000169946	ENSG00000147655	ENSG00000164841	ENSG00000120526	ENSG00000147679
TF	Factor: E2F-3:HES-7; motif: NNNSGCGCSNNNNNCRCGYGNN; match class: 1	TF:M08526_1	4.2079e-111	110.376	15130	5693	4920	19917	ENSG00000188976,ENSG00000186891,ENSG00000176022,ENSG00000107404,ENSG00000205090,ENSG00000160075,ENSG00000228594,ENSG00000189339,ENSG00000078369,ENSG00000169885,ENSG00000187730,ENSG00000067606,ENSG00000157933,ENSG00000116151,ENSG00000157881,ENSG00000197921,ENSG00000157870,ENSG00000142606,ENSG00000158109,ENSG00000130764,ENSG00000169598,ENSG00000198912,ENSG00000196581,ENSG00000131697,ENSG00000069424…
156735	ENSG00000085788	ENSG00000165046	ENSG00000169499	ENSG00000168615	ENSG00000197140	ENSG00000165061	ENSG00000165066	ENSG00000029534	ENSG00000070718	ENSG00000164808	ENSG00000104738	ENSG00000147481	ENSG00000147485	ENSG00000082556	ENSG00000047249	ENSG00000206579	ENSG00000170786	ENSG00000181195	ENSG00000104331	ENSG00000169122	ENSG00000215114	ENSG00000137575	ENSG00000035681	ENSG00000178538	ENSG00000177182	ENSG00000137563	ENSG00000180828	ENSG00000172817	ENSG00000178460	ENSG00000221947	ENSG00000178860	ENSG00000040341	ENSG00000104343	ENSG00000175606	ENSG00000104369	ENSG00000104381	ENSG00000104427	ENSG00000104435	ENSG00000164683	ENSG00000133731	ENSG00000104231	ENSG00000104497	ENSG00000184672	ENSG00000185015	ENSG00000123124	ENSG00000164823	ENSG00000123119	ENSG00000188343	ENSG00000164951
TF	Factor: E2F-2; motif: GCGCGCGCGYW; match class: 1	TF:M11531_1	4.32299e-110	109.364	12431	5693	4240	19917	ENSG00000188976,ENSG00000186891,ENSG00000176022,ENSG00000107404,ENSG00000205090,ENSG00000160075,ENSG00000228594,ENSG00000189339,ENSG00000078369,ENSG00000187730,ENSG00000067606,ENSG00000157933,ENSG00000116151,ENSG00000157881,ENSG00000197921,ENSG00000157870,ENSG00000158109,ENSG00000130764,ENSG00000169598,ENSG00000198912,ENSG00000196581,ENSG00000131697,ENSG00000069424,ENSG00000116254,ENSG00000158286…
130653	ENSG00000165724	ENSG00000148408	ENSG00000261456	ENSG00000015171	ENSG00000151240	ENSG00000107929	ENSG00000047056	ENSG00000067057	ENSG00000107959	ENSG00000165568	ENSG00000134461	ENSG00000134452	ENSG00000048740	ENSG00000151461	ENSG00000065665	ENSG00000151465	ENSG00000183049	ENSG00000151468	ENSG00000123240	ENSG00000187522	ENSG00000152465	ENSG00000148468	ENSG00000165985	ENSG00000165996	ENSG00000136738	ENSG00000165995	ENSG00000180592	ENSG00000148444	ENSG00000168267	ENSG00000185875	ENSG00000151025	ENSG00000136750	ENSG00000107890	ENSG00000120539	ENSG00000099246	ENSG00000150054	ENSG00000095787	ENSG00000198105	ENSG00000175395	ENSG00000189180	ENSG00000165733	ENSG00000165731	ENSG00000198915	ENSG00000196793	ENSG00000204175	ENSG00000204176	ENSG00000204179	ENSG00000277758	ENSG00000107643
TF	Factor: ETF; motif: GVGGMGG; match class: 1	TF:M00695_1	1.05582e-109	108.976	7067	5693	2717	19917	ENSG00000188976,ENSG00000176022,ENSG00000107404,ENSG00000205090,ENSG00000160075,ENSG00000228594,ENSG00000189339,ENSG00000078369,ENSG00000187730,ENSG00000067606,ENSG00000157933,ENSG00000116151,ENSG00000157881,ENSG00000197921,ENSG00000157870,ENSG00000158109,ENSG00000130764,ENSG00000169598,ENSG00000198912,ENSG00000196581,ENSG00000131697,ENSG00000116254,ENSG00000116237,ENSG00000158292,ENSG00000187017…
174177	ENSG00000167513	ENSG00000170100	ENSG00000178773	ENSG00000158792	ENSG00000187741	ENSG00000204991	ENSG00000141002	ENSG00000258947	ENSG00000140995	ENSG00000177946	ENSG00000003249	ENSG00000272636	ENSG00000141252	ENSG00000179409	ENSG00000167699	ENSG00000171861	ENSG00000167193	ENSG00000167703	ENSG00000167705	ENSG00000185924	ENSG00000141258	ENSG00000070444	ENSG00000132359	ENSG00000083454	ENSG00000004660	ENSG00000074370	ENSG00000132388	ENSG00000183018	ENSG00000132382	ENSG00000141503	ENSG00000205710	ENSG00000108559	ENSG00000129197	ENSG00000091622	ENSG00000282936	ENSG00000132535	ENSG00000006047	ENSG00000215041	ENSG00000169992	ENSG00000161956	ENSG00000129245	ENSG00000108947	ENSG00000170049	ENSG00000179111	ENSG00000220205	ENSG00000133026	ENSG00000007237	ENSG00000065559	ENSG00000006740
TF	Factor: E2F-2; motif: GCGCGCGCGYW	TF:M11531	4.22439e-108	107.374	13379	5693	4480	19917	ENSG00000188976,ENSG00000186891,ENSG00000176022,ENSG00000107404,ENSG00000205090,ENSG00000160075,ENSG00000228594,ENSG00000189339,ENSG00000078369,ENSG00000187730,ENSG00000067606,ENSG00000157933,ENSG00000116151,ENSG00000157881,ENSG00000197921,ENSG00000157870,ENSG00000158109,ENSG00000130764,ENSG00000169598,ENSG00000198912,ENSG00000196581,ENSG00000131697,ENSG00000069424,ENSG00000116254,ENSG00000158286…
148082	ENSG00000123975	ENSG00000165023	ENSG00000090054	ENSG00000196305	ENSG00000188312	ENSG00000165238	ENSG00000048828	ENSG00000175787	ENSG00000182150	ENSG00000165244	ENSG00000130956	ENSG00000136842	ENSG00000136937	ENSG00000095380	ENSG00000106789	ENSG00000136928	ENSG00000119508	ENSG00000136874	ENSG00000119509	ENSG00000241697	ENSG00000148123	ENSG00000198785	ENSG00000136824	ENSG00000165028	ENSG00000119318	ENSG00000119328	ENSG00000106771	ENSG00000260230	ENSG00000095203	ENSG00000070159	ENSG00000136813	ENSG00000059769	ENSG00000242616	ENSG00000148154	ENSG00000106868	ENSG00000148153	ENSG00000136866	ENSG00000119411	ENSG00000157657	ENSG00000136883	ENSG00000196739	ENSG00000136888	ENSG00000157693	ENSG00000148219	ENSG00000119401	ENSG00000078725	ENSG00000119402	ENSG00000119396	ENSG00000136848
TF	Factor: ETF; motif: GVGGMGG	TF:M00695	1.32621e-106	105.877	10500	5693	3706	19917	ENSG00000188976,ENSG00000176022,ENSG00000107404,ENSG00000205090,ENSG00000160075,ENSG00000228594,ENSG00000189339,ENSG00000078369,ENSG00000187730,ENSG00000067606,ENSG00000157933,ENSG00000116151,ENSG00000157881,ENSG00000197921,ENSG00000157870,ENSG00000158109,ENSG00000130764,ENSG00000169598,ENSG00000198912,ENSG00000196581,ENSG00000131697,ENSG00000069424,ENSG00000116254,ENSG00000158286,ENSG00000116237…
175315	ENSG00000087365	ENSG00000175115	ENSG00000174996	ENSG00000174871	ENSG00000174684	ENSG00000174669	ENSG00000174516	ENSG00000174165	ENSG00000173898	ENSG00000173715	ENSG00000173227	ENSG00000173020	ENSG00000172932	ENSG00000172531	ENSG00000110697	ENSG00000069482	ENSG00000132749	ENSG00000132740	ENSG00000162341	ENSG00000131620	ENSG00000186642	ENSG00000110237	ENSG00000054965	ENSG00000175582	ENSG00000149380	ENSG00000165434	ENSG00000077514	ENSG00000054938	ENSG00000166435	ENSG00000261594	ENSG00000149243	ENSG00000171533	ENSG00000062282	ENSG00000085741	ENSG00000179240	ENSG00000149260	ENSG00000149269	ENSG00000178301	ENSG00000149256	ENSG00000137494	ENSG00000110172	ENSG00000214376	ENSG00000110218	ENSG00000149212	ENSG00000137672	ENSG00000110318	ENSG00000110330	ENSG00000170962	ENSG00000170903
TF	Factor: E2F; motif: GGCGSG; match class: 1	TF:M00803_1	7.94603e-106	105.1	10294	5693	3646	19917	ENSG00000188976,ENSG00000176022,ENSG00000107404,ENSG00000205090,ENSG00000160075,ENSG00000228594,ENSG00000189339,ENSG00000078369,ENSG00000187730,ENSG00000067606,ENSG00000157933,ENSG00000116151,ENSG00000157881,ENSG00000197921,ENSG00000157870,ENSG00000158109,ENSG00000130764,ENSG00000169598,ENSG00000198912,ENSG00000196581,ENSG00000131697,ENSG00000069424,ENSG00000116254,ENSG00000158286,ENSG00000116237…
137727	ENSG00000170145	ENSG00000086827	ENSG00000182985	ENSG00000109917	ENSG00000177098	ENSG00000149582	ENSG00000095139	ENSG00000110367	ENSG00000137700	ENSG00000149428	ENSG00000160695	ENSG00000172269	ENSG00000172375	ENSG00000172273	ENSG00000172350	ENSG00000036672	ENSG00000149403	ENSG00000137642	ENSG00000154127	ENSG00000109944	ENSG00000109971	ENSG00000166250	ENSG00000023171	ENSG00000166257	ENSG00000165495	ENSG00000134910	ENSG00000198331	ENSG00000109832	ENSG00000064309	ENSG00000165526	ENSG00000182934	ENSG00000110074	ENSG00000150455	ENSG00000149571	ENSG00000170325	ENSG00000084234	ENSG00000134917	ENSG00000183715	ENSG00000151502	ENSG00000151500	ENSG00000151498	ENSG00000166105	ENSG00000149328	ENSG00000109956	ENSG00000120645	ENSG00000082805	ENSG00000171823	ENSG00000151067	ENSG00000004478
TF	Factor: ZF5; motif: NRNGNGCGCGCWN; match class: 1	TF:M00333_1	4.76805e-105	104.322	12512	5693	4246	19917	ENSG00000188976,ENSG00000186891,ENSG00000176022,ENSG00000107404,ENSG00000205090,ENSG00000160075,ENSG00000228594,ENSG00000189339,ENSG00000078369,ENSG00000187730,ENSG00000067606,ENSG00000157933,ENSG00000116151,ENSG00000157881,ENSG00000197921,ENSG00000157870,ENSG00000158109,ENSG00000130764,ENSG00000169598,ENSG00000198912,ENSG00000196581,ENSG00000131697,ENSG00000069424,ENSG00000116254,ENSG00000158286…
148468	ENSG00000165985	ENSG00000165996	ENSG00000136738	ENSG00000165995	ENSG00000180592	ENSG00000148444	ENSG00000168267	ENSG00000185875	ENSG00000151025	ENSG00000136750	ENSG00000107890	ENSG00000120539	ENSG00000099246	ENSG00000095787	ENSG00000198105	ENSG00000175395	ENSG00000189180	ENSG00000196693	ENSG00000165733	ENSG00000165731	ENSG00000198915	ENSG00000188234	ENSG00000204175	ENSG00000204176	ENSG00000277758	ENSG00000107643	ENSG00000225830	ENSG00000197444	ENSG00000227345	ENSG00000122952	ENSG00000072401	ENSG00000108064	ENSG00000165443	ENSG00000108091	ENSG00000122877	ENSG00000148572	ENSG00000179774	ENSG00000165732	ENSG00000198954	ENSG00000156515	ENSG00000075073	ENSG00000171224	ENSG00000197467	ENSG00000172731	ENSG00000107742	ENSG00000156026	ENSG00000213551	ENSG00000148660	ENSG00000165655
TF	Factor: E2F-4; motif: SNGGGCGGGAANN; match class: 1	TF:M09894_1	7.31624e-105	104.136	14041	5693	4638	19917	ENSG00000188976,ENSG00000186891,ENSG00000176022,ENSG00000107404,ENSG00000205090,ENSG00000160075,ENSG00000228594,ENSG00000189339,ENSG00000078369,ENSG00000169885,ENSG00000187730,ENSG00000067606,ENSG00000157933,ENSG00000116151,ENSG00000157881,ENSG00000197921,ENSG00000157870,ENSG00000158109,ENSG00000130764,ENSG00000169598,ENSG00000198912,ENSG00000196581,ENSG00000131697,ENSG00000116254,ENSG00000158286…
156017	ENSG00000106733	ENSG00000134996	ENSG00000135002	ENSG00000187210	ENSG00000106772	ENSG00000197969	ENSG00000106829	ENSG00000172159	ENSG00000135018	ENSG00000178966	ENSG00000135049	ENSG00000196730	ENSG00000156345	ENSG00000106723	ENSG00000148082	ENSG00000090054	ENSG00000165238	ENSG00000048828	ENSG00000175787	ENSG00000182150	ENSG00000165244	ENSG00000130956	ENSG00000136842	ENSG00000136937	ENSG00000095380	ENSG00000106789	ENSG00000136928	ENSG00000119508	ENSG00000136874	ENSG00000119509	ENSG00000241697	ENSG00000148123	ENSG00000165152	ENSG00000155827	ENSG00000198785	ENSG00000136824	ENSG00000165028	ENSG00000119318	ENSG00000119328	ENSG00000106771	ENSG00000260230	ENSG00000095203	ENSG00000070159	ENSG00000136813	ENSG00000059769	ENSG00000242616	ENSG00000148154	ENSG00000106868	ENSG00000148153
TF	Factor: E2F; motif: GGCGSG	TF:M00803	2.32504e-102	101.634	13289	5693	4440	19917	ENSG00000188976,ENSG00000186891,ENSG00000176022,ENSG00000107404,ENSG00000205090,ENSG00000160075,ENSG00000228594,ENSG00000189339,ENSG00000078369,ENSG00000187730,ENSG00000067606,ENSG00000157933,ENSG00000116151,ENSG00000157881,ENSG00000197921,ENSG00000157870,ENSG00000158109,ENSG00000130764,ENSG00000169598,ENSG00000198912,ENSG00000196581,ENSG00000131697,ENSG00000069424,ENSG00000116254,ENSG00000158286…
148154	ENSG00000106868	ENSG00000148153	ENSG00000136866	ENSG00000119411	ENSG00000157657	ENSG00000136883	ENSG00000196739	ENSG00000136888	ENSG00000157693	ENSG00000148219	ENSG00000119401	ENSG00000078725	ENSG00000119402	ENSG00000119396	ENSG00000136848	ENSG00000106852	ENSG00000119446	ENSG00000165209	ENSG00000119522	ENSG00000106689	ENSG00000173611	ENSG00000044574	ENSG00000119487	ENSG00000167081	ENSG00000136828	ENSG00000136854	ENSG00000095370	ENSG00000160408	ENSG00000167103	ENSG00000148339	ENSG00000148334	ENSG00000106976	ENSG00000167110	ENSG00000167112	ENSG00000167114	ENSG00000119392	ENSG00000197694	ENSG00000160445	ENSG00000107021	ENSG00000175283	ENSG00000119383	ENSG00000148331	ENSG00000136827	ENSG00000136878	ENSG00000148358	ENSG00000107130	ENSG00000148357	ENSG00000130707	ENSG00000130711
TF	Factor: E2F-2; motif: GCGCGCGCNCS; match class: 1	TF:M11529_1	3.12755e-102	101.505	14592	5693	4767	19917	ENSG00000188976,ENSG00000186891,ENSG00000176022,ENSG00000107404,ENSG00000205090,ENSG00000160075,ENSG00000228594,ENSG00000189339,ENSG00000078369,ENSG00000187730,ENSG00000067606,ENSG00000157933,ENSG00000116151,ENSG00000157881,ENSG00000197921,ENSG00000157870,ENSG00000142606,ENSG00000158109,ENSG00000130764,ENSG00000169598,ENSG00000198912,ENSG00000196581,ENSG00000131697,ENSG00000069424,ENSG00000116254…
156787	ENSG00000164983	ENSG00000170881	ENSG00000104549	ENSG00000164961	ENSG00000173334	ENSG00000153310	ENSG00000153317	ENSG00000132294	ENSG00000042832	ENSG00000008513	ENSG00000066827	ENSG00000131773	ENSG00000147724	ENSG00000169427	ENSG00000167632	ENSG00000022567	ENSG00000171045	ENSG00000181790	ENSG00000198576	ENSG00000160886	ENSG00000130193	ENSG00000180155	ENSG00000160932	ENSG00000176956	ENSG00000104524	ENSG00000183309	ENSG00000181135	ENSG00000180921	ENSG00000178719	ENSG00000179832	ENSG00000260428	ENSG00000261678	ENSG00000167702	ENSG00000160973	ENSG00000160972	ENSG00000167700	ENSG00000160959	ENSG00000080503	ENSG00000147852	ENSG00000106688	ENSG00000205808	ENSG00000120217	ENSG00000153714	ENSG00000175893	ENSG00000155158	ENSG00000164975	ENSG00000107295	ENSG00000155876	ENSG00000171843
TF	Factor: ZF5; motif: NRNGNGCGCGCWN	TF:M00333	3.43199e-99	98.4645	15217	5693	4910	19917	ENSG00000188976,ENSG00000186891,ENSG00000176022,ENSG00000107404,ENSG00000205090,ENSG00000160075,ENSG00000228594,ENSG00000189339,ENSG00000078369,ENSG00000187730,ENSG00000067606,ENSG00000157933,ENSG00000116151,ENSG00000157881,ENSG00000197921,ENSG00000157870,ENSG00000158109,ENSG00000130764,ENSG00000169598,ENSG00000198912,ENSG00000196581,ENSG00000131697,ENSG00000069424,ENSG00000116254,ENSG00000158286…
35681	ENSG00000178538	ENSG00000137563	ENSG00000180828	ENSG00000172817	ENSG00000178460	ENSG00000221947	ENSG00000104313	ENSG00000178860	ENSG00000040341	ENSG00000104343	ENSG00000175606	ENSG00000104369	ENSG00000104381	ENSG00000104427	ENSG00000104435	ENSG00000164683	ENSG00000076554	ENSG00000253598	ENSG00000104231	ENSG00000104497	ENSG00000184672	ENSG00000185015	ENSG00000123124	ENSG00000164823	ENSG00000123119	ENSG00000155099	ENSG00000079102	ENSG00000188343	ENSG00000164951	ENSG00000156170	ENSG00000156471	ENSG00000180543	ENSG00000147649	ENSG00000104341	ENSG00000177459	ENSG00000104356	ENSG00000104361	ENSG00000156486	ENSG00000164924	ENSG00000120963	ENSG00000155096	ENSG00000155097	ENSG00000164933	ENSG00000176406	ENSG00000147650	ENSG00000169946	ENSG00000147655	ENSG00000164841	ENSG00000120526
TF	Factor: ZF5; motif: GGSGCGCGS	TF:M10438	4.15337e-95	94.3816	16373	5693	5168	19917	ENSG00000188976,ENSG00000186891,ENSG00000176022,ENSG00000107404,ENSG00000205090,ENSG00000160075,ENSG00000228594,ENSG00000189339,ENSG00000078369,ENSG00000187730,ENSG00000067606,ENSG00000157933,ENSG00000116151,ENSG00000157881,ENSG00000197921,ENSG00000157870,ENSG00000142606,ENSG00000158109,ENSG00000130764,ENSG00000169598,ENSG00000198912,ENSG00000196581,ENSG00000131697,ENSG00000069424,ENSG00000116254…
6530	ENSG00000106123	ENSG00000165125	ENSG00000159784	ENSG00000198420	ENSG00000196511	ENSG00000174469	ENSG00000055130	ENSG00000197362	ENSG00000204947	ENSG00000197024	ENSG00000196453	ENSG00000181220	ENSG00000133619	ENSG00000181444	ENSG00000171130	ENSG00000127399	ENSG00000188707	ENSG00000055118	ENSG00000181652	ENSG00000164885	ENSG00000133612	ENSG00000033050	ENSG00000033100	ENSG00000082014	ENSG00000127377	ENSG00000106617	ENSG00000178234	ENSG00000196584	ENSG00000133627	ENSG00000130226	ENSG00000157219	ENSG00000164778	ENSG00000164690	ENSG00000105983	ENSG00000009335	ENSG00000105993	ENSG00000155093	ENSG00000146918	ENSG00000117868	ENSG00000180190	ENSG00000104714	ENSG00000198010	ENSG00000176595	ENSG00000183117	ENSG00000147316	ENSG00000275342	ENSG00000147324	ENSG00000184647	ENSG00000104643
TF	Factor: Churchill; motif: CGGGNN; match class: 1	TF:M00986_1	1.2029e-93	92.9198	10429	5693	3643	19917	ENSG00000188976,ENSG00000186891,ENSG00000176022,ENSG00000107404,ENSG00000205090,ENSG00000160075,ENSG00000228594,ENSG00000189339,ENSG00000078369,ENSG00000169885,ENSG00000187730,ENSG00000067606,ENSG00000157933,ENSG00000116151,ENSG00000157881,ENSG00000197921,ENSG00000157870,ENSG00000158109,ENSG00000130764,ENSG00000169598,ENSG00000198912,ENSG00000196581,ENSG00000131697,ENSG00000116254,ENSG00000158286…
139180	ENSG00000111262	ENSG00000130037	ENSG00000139193	ENSG00000159335	ENSG00000250510	ENSG00000110811	ENSG00000111664	ENSG00000111674	ENSG00000139182	ENSG00000059804	ENSG00000065970	ENSG00000139112	ENSG00000111261	ENSG00000111269	ENSG00000111276	ENSG00000273079	ENSG00000197837	ENSG00000151490	ENSG00000052126	ENSG00000111726	ENSG00000111728	ENSG00000111731	ENSG00000060982	ENSG00000133703	ENSG00000029153	ENSG00000087448	ENSG00000087494	ENSG00000123106	ENSG00000133687	ENSG00000110888	ENSG00000170456	ENSG00000151743	ENSG00000151746	ENSG00000057294	ENSG00000151229	ENSG00000188906	ENSG00000139174	ENSG00000129317	ENSG00000184613	ENSG00000111371	ENSG00000134291	ENSG00000139219	ENSG00000177981	ENSG00000177875	ENSG00000167535	ENSG00000134287	ENSG00000169884	ENSG00000181418	ENSG00000123416
TF	Factor: TCF-1; motif: ACATCGRGRCGCTGW; match class: 1	TF:M11603_1	1.47369e-93	92.8316	13293	5693	4414	19917	ENSG00000188976,ENSG00000186891,ENSG00000176022,ENSG00000107404,ENSG00000205090,ENSG00000160075,ENSG00000228594,ENSG00000189339,ENSG00000078369,ENSG00000187730,ENSG00000067606,ENSG00000157933,ENSG00000116151,ENSG00000157881,ENSG00000197921,ENSG00000157870,ENSG00000142606,ENSG00000158109,ENSG00000130764,ENSG00000169598,ENSG00000198912,ENSG00000196581,ENSG00000131697,ENSG00000069424,ENSG00000116254…
119446	ENSG00000011454	ENSG00000165209	ENSG00000119522	ENSG00000106689	ENSG00000173611	ENSG00000044574	ENSG00000119487	ENSG00000167081	ENSG00000136828	ENSG00000136854	ENSG00000095370	ENSG00000160408	ENSG00000167103	ENSG00000148339	ENSG00000148334	ENSG00000106976	ENSG00000167110	ENSG00000167112	ENSG00000167114	ENSG00000119392	ENSG00000197694	ENSG00000160445	ENSG00000175283	ENSG00000119383	ENSG00000148331	ENSG00000136827	ENSG00000136878	ENSG00000148358	ENSG00000107130	ENSG00000148357	ENSG00000130707	ENSG00000130711	ENSG00000130720	ENSG00000160539	ENSG00000130714	ENSG00000107263	ENSG00000107290	ENSG00000165699	ENSG00000160326	ENSG00000197859	ENSG00000196990	ENSG00000123454	ENSG00000196363	ENSG00000130635	ENSG00000130558	ENSG00000165643	ENSG00000107147	ENSG00000130559	ENSG00000238227
TF	Factor: E2F-3; motif: GGCGGGN	TF:M02089	3.40464e-92	91.4679	13271	5693	4404	19917	ENSG00000188976,ENSG00000186891,ENSG00000176022,ENSG00000107404,ENSG00000205090,ENSG00000160075,ENSG00000228594,ENSG00000189339,ENSG00000078369,ENSG00000169885,ENSG00000187730,ENSG00000067606,ENSG00000157933,ENSG00000116151,ENSG00000157881,ENSG00000197921,ENSG00000157870,ENSG00000142606,ENSG00000158109,ENSG00000130764,ENSG00000169598,ENSG00000198912,ENSG00000196581,ENSG00000131697,ENSG00000116254…
107290	ENSG00000165699	ENSG00000197859	ENSG00000196990	ENSG00000235106	ENSG00000196363	ENSG00000130635	ENSG00000130558	ENSG00000165643	ENSG00000107147	ENSG00000130559	ENSG00000238227	ENSG00000148396	ENSG00000165716	ENSG00000177984	ENSG00000196642	ENSG00000232434	ENSG00000159069	ENSG00000177239	ENSG00000212864	ENSG00000197191	ENSG00000188229	ENSG00000165802	ENSG00000130653	ENSG00000165724	ENSG00000148408	ENSG00000261456	ENSG00000015171	ENSG00000151240	ENSG00000107929	ENSG00000047056	ENSG00000067057	ENSG00000107959	ENSG00000165568	ENSG00000178363	ENSG00000134461	ENSG00000134452	ENSG00000048740	ENSG00000151461	ENSG00000065665	ENSG00000151465	ENSG00000183049	ENSG00000151468	ENSG00000123240	ENSG00000187522	ENSG00000152465	ENSG00000148468	ENSG00000148481	ENSG00000165983	ENSG00000165985
TF	Factor: WT1; motif: CGCCCCCNCN	TF:M02036	1.74301e-91	90.7587	9820	5693	3464	19917	ENSG00000188976,ENSG00000186891,ENSG00000176022,ENSG00000107404,ENSG00000205090,ENSG00000160075,ENSG00000228594,ENSG00000189339,ENSG00000078369,ENSG00000187730,ENSG00000067606,ENSG00000157933,ENSG00000116151,ENSG00000157881,ENSG00000197921,ENSG00000157870,ENSG00000158109,ENSG00000130764,ENSG00000169598,ENSG00000198912,ENSG00000196581,ENSG00000131697,ENSG00000116254,ENSG00000158292,ENSG00000187017…
173598	ENSG00000074527	ENSG00000139344	ENSG00000111145	ENSG00000059758	ENSG00000120868	ENSG00000185046	ENSG00000111647	ENSG00000111696	ENSG00000166598	ENSG00000120820	ENSG00000255150	ENSG00000235162	ENSG00000074590	ENSG00000013503	ENSG00000111785	ENSG00000151136	ENSG00000110851	ENSG00000110880	ENSG00000151148	ENSG00000139436	ENSG00000174437	ENSG00000204856	ENSG00000196850	ENSG00000111249	ENSG00000173064	ENSG00000135144	ENSG00000123064	ENSG00000139405	ENSG00000151176	ENSG00000135116	ENSG00000174989	ENSG00000088992	ENSG00000135108	ENSG00000089250	ENSG00000171435	ENSG00000111445	ENSG00000176871	ENSG00000135090	ENSG00000111707	ENSG00000135127	ENSG00000111737	ENSG00000157782	ENSG00000175970	ENSG00000157837	ENSG00000110931	ENSG00000089094	ENSG00000139725	ENSG00000110987	ENSG00000176383
TF	Factor: TCF-1; motif: ACATCGRGRCGCTGW; match class: 1	TF:M11601_1	1.89987e-91	90.7213	11153	5693	3836	19917	ENSG00000188976,ENSG00000176022,ENSG00000107404,ENSG00000205090,ENSG00000160075,ENSG00000228594,ENSG00000189339,ENSG00000078369,ENSG00000187730,ENSG00000067606,ENSG00000157933,ENSG00000116151,ENSG00000157881,ENSG00000197921,ENSG00000157870,ENSG00000142606,ENSG00000158109,ENSG00000130764,ENSG00000169598,ENSG00000198912,ENSG00000196581,ENSG00000131697,ENSG00000069424,ENSG00000116254,ENSG00000158286…
109881	ENSG00000182255	ENSG00000170946	ENSG00000049449	ENSG00000176148	ENSG00000110429	ENSG00000135387	ENSG00000110435	ENSG00000179431	ENSG00000149084	ENSG00000085117	ENSG00000157570	ENSG00000175274	ENSG00000019485	ENSG00000019505	ENSG00000181830	ENSG00000121671	ENSG00000121653	ENSG00000149091	ENSG00000180720	ENSG00000110497	ENSG00000175224	ENSG00000175216	ENSG00000110514	ENSG00000149187	ENSG00000186907	ENSG00000166793	ENSG00000156599	ENSG00000186660	ENSG00000110104	ENSG00000006118	ENSG00000013725	ENSG00000167992	ENSG00000204950	ENSG00000011347	ENSG00000134780	ENSG00000149503	ENSG00000162194	ENSG00000168000	ENSG00000162222	ENSG00000168569	ENSG00000133316	ENSG00000133318	ENSG00000188070	ENSG00000168005	ENSG00000167771	ENSG00000167770	ENSG00000168439	ENSG00000182450	ENSG00000219435
TF	Factor: Egr-1; motif: GCGCATGCG; match class: 1	TF:M04869_1	9.56544e-91	90.0193	10315	5693	3601	19917	ENSG00000188976,ENSG00000176022,ENSG00000107404,ENSG00000205090,ENSG00000160075,ENSG00000228594,ENSG00000189339,ENSG00000078369,ENSG00000187730,ENSG00000067606,ENSG00000157933,ENSG00000116151,ENSG00000157881,ENSG00000197921,ENSG00000157870,ENSG00000158109,ENSG00000130764,ENSG00000169598,ENSG00000196581,ENSG00000131697,ENSG00000116254,ENSG00000158286,ENSG00000116237,ENSG00000158292,ENSG00000187017…
109917	ENSG00000137726	ENSG00000149582	ENSG00000137700	ENSG00000172375	ENSG00000172273	ENSG00000172350	ENSG00000173456	ENSG00000036672	ENSG00000154096	ENSG00000149403	ENSG00000109929	ENSG00000137642	ENSG00000154127	ENSG00000109944	ENSG00000109971	ENSG00000166250	ENSG00000023171	ENSG00000166257	ENSG00000154146	ENSG00000165495	ENSG00000198331	ENSG00000109832	ENSG00000064309	ENSG00000150455	ENSG00000174370	ENSG00000170325	ENSG00000084234	ENSG00000134917	ENSG00000183715	ENSG00000151502	ENSG00000166105	ENSG00000149328	ENSG00000109956	ENSG00000120645	ENSG00000082805	ENSG00000111186	ENSG00000171823	ENSG00000166159	ENSG00000151067	ENSG00000004478	ENSG00000111203	ENSG00000171792	ENSG00000011105	ENSG00000111224	ENSG00000078237	ENSG00000047621	ENSG00000111247	ENSG00000139180	ENSG00000130037
TF	Factor: E2F-3; motif: GGCGGGN; match class: 1	TF:M02089_1	7.90838e-89	88.1019	9425	5693	3342	19917	ENSG00000188976,ENSG00000186891,ENSG00000107404,ENSG00000205090,ENSG00000228594,ENSG00000189339,ENSG00000078369,ENSG00000187730,ENSG00000067606,ENSG00000157933,ENSG00000116151,ENSG00000157881,ENSG00000197921,ENSG00000157870,ENSG00000158109,ENSG00000130764,ENSG00000169598,ENSG00000198912,ENSG00000196581,ENSG00000131697,ENSG00000116254,ENSG00000158286,ENSG00000116237,ENSG00000158292,ENSG00000187017…
102531	ENSG00000102543	ENSG00000102753	ENSG00000186047	ENSG00000136104	ENSG00000102786	ENSG00000123191	ENSG00000253710	ENSG00000204899	ENSG00000102554	ENSG00000136153	ENSG00000005810	ENSG00000165300	ENSG00000185352	ENSG00000125249	ENSG00000065150	ENSG00000102572	ENSG00000125304	ENSG00000175198	ENSG00000102452	ENSG00000102466	ENSG00000151287	ENSG00000125266	ENSG00000204442	ENSG00000174405	ENSG00000185950	ENSG00000102606	ENSG00000153495	ENSG00000182968	ENSG00000150401	ENSG00000183087	ENSG00000198824	ENSG00000129484	ENSG00000185271	ENSG00000165782	ENSG00000165804	ENSG00000129472	ENSG00000092203	ENSG00000235194	ENSG00000092096	ENSG00000213983	ENSG00000186648	ENSG00000100897	ENSG00000196497	ENSG00000100949	ENSG00000205978	ENSG00000139910	ENSG00000196792	ENSG00000100478	ENSG00000168348
TF	Factor: E2F-2; motif: GCGCGCGCNCS	TF:M11529	1.49485e-86	85.8254	16407	5693	5155	19917	ENSG00000188976,ENSG00000186891,ENSG00000176022,ENSG00000107404,ENSG00000205090,ENSG00000160075,ENSG00000228594,ENSG00000189339,ENSG00000078369,ENSG00000169885,ENSG00000187730,ENSG00000067606,ENSG00000157933,ENSG00000116151,ENSG00000157881,ENSG00000197921,ENSG00000157870,ENSG00000142606,ENSG00000158109,ENSG00000130764,ENSG00000169598,ENSG00000198912,ENSG00000196581,ENSG00000131697,ENSG00000069424…
198420	ENSG00000196511	ENSG00000174469	ENSG00000055130	ENSG00000197362	ENSG00000204947	ENSG00000197024	ENSG00000196453	ENSG00000181220	ENSG00000133619	ENSG00000181444	ENSG00000171130	ENSG00000127399	ENSG00000188707	ENSG00000055118	ENSG00000181652	ENSG00000164885	ENSG00000133612	ENSG00000033050	ENSG00000033100	ENSG00000082014	ENSG00000127377	ENSG00000106617	ENSG00000178234	ENSG00000196584	ENSG00000133627	ENSG00000130226	ENSG00000157219	ENSG00000164778	ENSG00000164690	ENSG00000105983	ENSG00000009335	ENSG00000105993	ENSG00000155093	ENSG00000146918	ENSG00000117868	ENSG00000180190	ENSG00000104714	ENSG00000198010	ENSG00000176595	ENSG00000036448	ENSG00000183117	ENSG00000147316	ENSG00000275342	ENSG00000147324	ENSG00000184647	ENSG00000104643	ENSG00000154328	ENSG00000186523	ENSG00000145002
TF	Factor: E2F-1:HES-7; motif: GGCRCGTGSYNNWNGGCGCSM; match class: 1	TF:M08525_1	2.89594e-86	85.5382	15410	5693	4921	19917	ENSG00000188976,ENSG00000186891,ENSG00000176022,ENSG00000107404,ENSG00000205090,ENSG00000160075,ENSG00000228594,ENSG00000189339,ENSG00000078369,ENSG00000169885,ENSG00000187730,ENSG00000067606,ENSG00000157933,ENSG00000116151,ENSG00000157881,ENSG00000197921,ENSG00000157870,ENSG00000142606,ENSG00000158109,ENSG00000130764,ENSG00000169598,ENSG00000198912,ENSG00000196581,ENSG00000131697,ENSG00000069424…
206579	ENSG00000170786	ENSG00000181195	ENSG00000104331	ENSG00000169122	ENSG00000215114	ENSG00000137575	ENSG00000035681	ENSG00000178538	ENSG00000177182	ENSG00000137563	ENSG00000180828	ENSG00000172817	ENSG00000178460	ENSG00000221947	ENSG00000178860	ENSG00000040341	ENSG00000104343	ENSG00000175606	ENSG00000104369	ENSG00000104381	ENSG00000104435	ENSG00000164683	ENSG00000133731	ENSG00000104231	ENSG00000104497	ENSG00000184672	ENSG00000185015	ENSG00000123124	ENSG00000164823	ENSG00000104327	ENSG00000123119	ENSG00000079102	ENSG00000188343	ENSG00000164951	ENSG00000156170	ENSG00000156471	ENSG00000180543	ENSG00000147649	ENSG00000104341	ENSG00000177459	ENSG00000104356	ENSG00000104361	ENSG00000156486	ENSG00000164924	ENSG00000120963	ENSG00000155096	ENSG00000155097	ENSG00000164933	ENSG00000176406
TF	Factor: ZF5; motif: GSGCGCGR	TF:M00716	3.75823e-86	85.425	16245	5693	5117	19917	ENSG00000188976,ENSG00000186891,ENSG00000176022,ENSG00000107404,ENSG00000205090,ENSG00000160075,ENSG00000228594,ENSG00000189339,ENSG00000078369,ENSG00000187730,ENSG00000067606,ENSG00000157933,ENSG00000116151,ENSG00000157881,ENSG00000197921,ENSG00000157870,ENSG00000142606,ENSG00000158109,ENSG00000130764,ENSG00000169598,ENSG00000198912,ENSG00000196581,ENSG00000131697,ENSG00000069424,ENSG00000116254…
133612	ENSG00000033050	ENSG00000033100	ENSG00000082014	ENSG00000127377	ENSG00000106617	ENSG00000178234	ENSG00000196584	ENSG00000133627	ENSG00000130226	ENSG00000157219	ENSG00000164778	ENSG00000164690	ENSG00000105983	ENSG00000009335	ENSG00000105993	ENSG00000155093	ENSG00000146918	ENSG00000117868	ENSG00000180190	ENSG00000104714	ENSG00000198010	ENSG00000176595	ENSG00000183117	ENSG00000147316	ENSG00000275342	ENSG00000147324	ENSG00000184647	ENSG00000104643	ENSG00000154328	ENSG00000186523	ENSG00000145002	ENSG00000164741	ENSG00000164743	ENSG00000185053	ENSG00000104723	ENSG00000155970	ENSG00000104219	ENSG00000155975	ENSG00000003987	ENSG00000104213	ENSG00000175445	ENSG00000147416	ENSG00000158806	ENSG00000158815	ENSG00000158856	ENSG00000275074	ENSG00000168490	ENSG00000197181	ENSG00000104635
TF	Factor: TCF-1; motif: ACATCGRGRCGCTGW	TF:M11601	5.87984e-84	83.2306	14964	5693	4806	19917	ENSG00000188976,ENSG00000186891,ENSG00000176022,ENSG00000107404,ENSG00000205090,ENSG00000160075,ENSG00000228594,ENSG00000189339,ENSG00000078369,ENSG00000187730,ENSG00000067606,ENSG00000157933,ENSG00000116151,ENSG00000157881,ENSG00000197921,ENSG00000157870,ENSG00000142606,ENSG00000158109,ENSG00000130764,ENSG00000169598,ENSG00000198912,ENSG00000196581,ENSG00000131697,ENSG00000069424,ENSG00000116254…
215114	ENSG00000137575	ENSG00000035681	ENSG00000178538	ENSG00000137563	ENSG00000180828	ENSG00000172817	ENSG00000178460	ENSG00000221947	ENSG00000178860	ENSG00000040341	ENSG00000104343	ENSG00000175606	ENSG00000104369	ENSG00000104381	ENSG00000104427	ENSG00000104435	ENSG00000164683	ENSG00000133731	ENSG00000253598	ENSG00000104231	ENSG00000185015	ENSG00000123124	ENSG00000164823	ENSG00000123119	ENSG00000079102	ENSG00000188343	ENSG00000164951	ENSG00000156170	ENSG00000156471	ENSG00000180543	ENSG00000147649	ENSG00000104341	ENSG00000104356	ENSG00000104361	ENSG00000156486	ENSG00000164924	ENSG00000120963	ENSG00000155096	ENSG00000155097	ENSG00000164933	ENSG00000176406	ENSG00000147650	ENSG00000169946	ENSG00000147655	ENSG00000164841	ENSG00000164796	ENSG00000164754	ENSG00000205002	ENSG00000182197
TF	Factor: Churchill; motif: CGGGNN	TF:M00986	1.17658e-82	81.9294	14305	5693	4638	19917	ENSG00000188976,ENSG00000186891,ENSG00000176022,ENSG00000107404,ENSG00000205090,ENSG00000160075,ENSG00000228594,ENSG00000189339,ENSG00000078369,ENSG00000169885,ENSG00000187730,ENSG00000067606,ENSG00000157933,ENSG00000116151,ENSG00000157881,ENSG00000197921,ENSG00000157870,ENSG00000142606,ENSG00000158109,ENSG00000130764,ENSG00000169598,ENSG00000198912,ENSG00000196581,ENSG00000131697,ENSG00000069424…
147912	ENSG00000175768	ENSG00000122741	ENSG00000137124	ENSG00000137142	ENSG00000106714	ENSG00000283886	ENSG00000215126	ENSG00000172014	ENSG00000147996	ENSG00000196873	ENSG00000107242	ENSG00000187866	ENSG00000107282	ENSG00000165072	ENSG00000119138	ENSG00000107372	ENSG00000135045	ENSG00000156017	ENSG00000106733	ENSG00000134996	ENSG00000135002	ENSG00000187210	ENSG00000106772	ENSG00000197969	ENSG00000106829	ENSG00000172159	ENSG00000135018	ENSG00000178966	ENSG00000135049	ENSG00000196730	ENSG00000156345	ENSG00000106723	ENSG00000148082	ENSG00000123975	ENSG00000090054	ENSG00000165238	ENSG00000048828	ENSG00000175787	ENSG00000182150	ENSG00000165244	ENSG00000130956	ENSG00000136842	ENSG00000136937	ENSG00000095380	ENSG00000106789	ENSG00000136928	ENSG00000136874	ENSG00000119509	ENSG00000241697
TF	Factor: BEN; motif: CAGCGRNV; match class: 1	TF:M01240_1	4.33399e-81	80.3631	13334	5693	4384	19917	ENSG00000186891,ENSG00000176022,ENSG00000205090,ENSG00000160075,ENSG00000228594,ENSG00000189339,ENSG00000078369,ENSG00000169885,ENSG00000187730,ENSG00000067606,ENSG00000157933,ENSG00000116151,ENSG00000157881,ENSG00000197921,ENSG00000157870,ENSG00000142606,ENSG00000158109,ENSG00000130764,ENSG00000169598,ENSG00000198912,ENSG00000196581,ENSG00000131697,ENSG00000116254,ENSG00000158286,ENSG00000158292…
167081	ENSG00000136828	ENSG00000136854	ENSG00000095370	ENSG00000160408	ENSG00000167103	ENSG00000148339	ENSG00000148334	ENSG00000106976	ENSG00000167110	ENSG00000167112	ENSG00000167114	ENSG00000119392	ENSG00000197694	ENSG00000160445	ENSG00000175283	ENSG00000119383	ENSG00000148331	ENSG00000136878	ENSG00000148358	ENSG00000107130	ENSG00000148357	ENSG00000130707	ENSG00000130711	ENSG00000130713	ENSG00000130720	ENSG00000130714	ENSG00000107263	ENSG00000107290	ENSG00000165699	ENSG00000160326	ENSG00000197859	ENSG00000196990	ENSG00000196363	ENSG00000130635	ENSG00000130558	ENSG00000165643	ENSG00000107147	ENSG00000130559	ENSG00000238227	ENSG00000148396	ENSG00000165716	ENSG00000196642	ENSG00000232434	ENSG00000159069	ENSG00000177239	ENSG00000176884	ENSG00000212864	ENSG00000197191	ENSG00000188229
TF	Factor: Egr-1; motif: GCGCATGCG	TF:M04869	7.60454e-81	80.1189	11319	5693	3844	19917	ENSG00000188976,ENSG00000176022,ENSG00000107404,ENSG00000205090,ENSG00000160075,ENSG00000228594,ENSG00000189339,ENSG00000078369,ENSG00000187730,ENSG00000067606,ENSG00000157933,ENSG00000116151,ENSG00000157881,ENSG00000197921,ENSG00000157870,ENSG00000158109,ENSG00000130764,ENSG00000169598,ENSG00000196581,ENSG00000131697,ENSG00000069424,ENSG00000116254,ENSG00000158286,ENSG00000116237,ENSG00000158292…
166436	ENSG00000175352	ENSG00000205339	ENSG00000198730	ENSG00000110321	ENSG00000110328	ENSG00000170242	ENSG00000050165	ENSG00000133794	ENSG00000129083	ENSG00000110680	ENSG00000188211	ENSG00000187486	ENSG00000006071	ENSG00000129159	ENSG00000129158	ENSG00000179119	ENSG00000110786	ENSG00000165973	ENSG00000183161	ENSG00000198168	ENSG00000169519	ENSG00000049449	ENSG00000176148	ENSG00000135387	ENSG00000110435	ENSG00000179431	ENSG00000149084	ENSG00000157570	ENSG00000175274	ENSG00000019485	ENSG00000181830	ENSG00000121671	ENSG00000121653	ENSG00000180720	ENSG00000110497	ENSG00000175216	ENSG00000110514	ENSG00000149187	ENSG00000172247	ENSG00000186907	ENSG00000156599	ENSG00000233436	ENSG00000186660	ENSG00000110104	ENSG00000013725	ENSG00000167992	ENSG00000204950	ENSG00000011347	ENSG00000134780
TF	Factor: MAZ; motif: GGGMGGGGSSGGGGGGGGGGGG; match class: 1	TF:M09636_1	7.47926e-80	79.1261	14202	5693	4603	19917	ENSG00000188976,ENSG00000186891,ENSG00000176022,ENSG00000107404,ENSG00000205090,ENSG00000160075,ENSG00000228594,ENSG00000189339,ENSG00000078369,ENSG00000187730,ENSG00000067606,ENSG00000157933,ENSG00000116151,ENSG00000157881,ENSG00000197921,ENSG00000157870,ENSG00000142606,ENSG00000158109,ENSG00000130764,ENSG00000169598,ENSG00000198912,ENSG00000196581,ENSG00000131697,ENSG00000069424,ENSG00000116254…
172159	ENSG00000135018	ENSG00000178966	ENSG00000135049	ENSG00000196730	ENSG00000106723	ENSG00000123975	ENSG00000165023	ENSG00000090054	ENSG00000188312	ENSG00000127081	ENSG00000165238	ENSG00000048828	ENSG00000175787	ENSG00000165244	ENSG00000130956	ENSG00000136842	ENSG00000136937	ENSG00000095380	ENSG00000106789	ENSG00000136928	ENSG00000119508	ENSG00000136874	ENSG00000119509	ENSG00000241697	ENSG00000148123	ENSG00000165152	ENSG00000155827	ENSG00000198785	ENSG00000136824	ENSG00000165028	ENSG00000119318	ENSG00000119328	ENSG00000106771	ENSG00000260230	ENSG00000095203	ENSG00000070159	ENSG00000136813	ENSG00000242616	ENSG00000148154	ENSG00000106868	ENSG00000148153	ENSG00000119411	ENSG00000157657	ENSG00000136883	ENSG00000196739	ENSG00000136888	ENSG00000157693	ENSG00000148219	ENSG00000119401
TF	Factor: E2F-1:Elk-1; motif: SGCGCSNNAMCGGAAGT; match class: 1	TF:M08205_1	8.55493e-79	78.0678	10502	5693	3610	19917	ENSG00000188976,ENSG00000186891,ENSG00000176022,ENSG00000107404,ENSG00000205090,ENSG00000160075,ENSG00000228594,ENSG00000189339,ENSG00000078369,ENSG00000187730,ENSG00000067606,ENSG00000157933,ENSG00000116151,ENSG00000157881,ENSG00000197921,ENSG00000157870,ENSG00000158109,ENSG00000130764,ENSG00000169598,ENSG00000198912,ENSG00000196581,ENSG00000131697,ENSG00000069424,ENSG00000116254,ENSG00000158286…
137642	ENSG00000109944	ENSG00000109971	ENSG00000166250	ENSG00000023171	ENSG00000166257	ENSG00000154146	ENSG00000165495	ENSG00000198331	ENSG00000109832	ENSG00000064309	ENSG00000110074	ENSG00000150455	ENSG00000174370	ENSG00000120471	ENSG00000170325	ENSG00000134917	ENSG00000183715	ENSG00000151502	ENSG00000151500	ENSG00000151498	ENSG00000166105	ENSG00000109956	ENSG00000120645	ENSG00000082805	ENSG00000171823	ENSG00000151067	ENSG00000004478	ENSG00000111203	ENSG00000171792	ENSG00000011105	ENSG00000111218	ENSG00000111224	ENSG00000118971	ENSG00000078237	ENSG00000139180	ENSG00000111262	ENSG00000130037	ENSG00000139190	ENSG00000010295	ENSG00000139200	ENSG00000159335	ENSG00000250510	ENSG00000110811	ENSG00000111667	ENSG00000139194	ENSG00000065970	ENSG00000003056	ENSG00000139112	ENSG00000165714
TF	Factor: Sp1; motif: NGGGGCGGGGN	TF:M07395	9.20159e-79	78.0361	10721	5693	3671	19917	ENSG00000188976,ENSG00000186891,ENSG00000176022,ENSG00000107404,ENSG00000205090,ENSG00000160075,ENSG00000228594,ENSG00000189339,ENSG00000078369,ENSG00000187730,ENSG00000067606,ENSG00000157933,ENSG00000116151,ENSG00000157881,ENSG00000197921,ENSG00000157870,ENSG00000158109,ENSG00000130764,ENSG00000169598,ENSG00000198912,ENSG00000196581,ENSG00000131697,ENSG00000158286,ENSG00000116237,ENSG00000158292…
110074	ENSG00000150455	ENSG00000174370	ENSG00000170325	ENSG00000084234	ENSG00000134917	ENSG00000183715	ENSG00000151502	ENSG00000151500	ENSG00000151498	ENSG00000166105	ENSG00000149328	ENSG00000109956	ENSG00000120645	ENSG00000082805	ENSG00000111186	ENSG00000171823	ENSG00000151067	ENSG00000004478	ENSG00000111203	ENSG00000053702	ENSG00000011105	ENSG00000111218	ENSG00000111224	ENSG00000078237	ENSG00000047621	ENSG00000139180	ENSG00000111262	ENSG00000139190	ENSG00000139200	ENSG00000159335	ENSG00000250510	ENSG00000110811	ENSG00000111667	ENSG00000111674	ENSG00000139194	ENSG00000139182	ENSG00000059804	ENSG00000065970	ENSG00000139112	ENSG00000180574	ENSG00000165714	ENSG00000111269	ENSG00000111276	ENSG00000084444	ENSG00000273079	ENSG00000151490	ENSG00000052126	ENSG00000111726	ENSG00000111728
TF	Factor: Sp1; motif: NGGGGGCGGGGYN	TF:M00196	2.02839e-77	76.6928	10303	5693	3549	19917	ENSG00000188976,ENSG00000186891,ENSG00000176022,ENSG00000107404,ENSG00000205090,ENSG00000160075,ENSG00000228594,ENSG00000189339,ENSG00000078369,ENSG00000187730,ENSG00000067606,ENSG00000157933,ENSG00000116151,ENSG00000157881,ENSG00000197921,ENSG00000157870,ENSG00000158109,ENSG00000130764,ENSG00000169598,ENSG00000198912,ENSG00000196581,ENSG00000131697,ENSG00000116254,ENSG00000158286,ENSG00000116237…
135519	ENSG00000110844	ENSG00000135472	ENSG00000110881	ENSG00000066117	ENSG00000110925	ENSG00000184271	ENSG00000135503	ENSG00000161835	ENSG00000123358	ENSG00000170442	ENSG00000170421	ENSG00000111057	ENSG00000167778	ENSG00000167779	ENSG00000139637	ENSG00000094916	ENSG00000135447	ENSG00000181852	ENSG00000139645	ENSG00000062485	ENSG00000110958	ENSG00000198056	ENSG00000166886	ENSG00000182379	ENSG00000139269	ENSG00000166986	ENSG00000155980	ENSG00000166908	ENSG00000240771	ENSG00000135439	ENSG00000139266	ENSG00000166896	ENSG00000111110	ENSG00000174206	ENSG00000184575	ENSG00000135677	ENSG00000111490	ENSG00000156076	ENSG00000135643	ENSG00000072657	ENSG00000166006	ENSG00000091039	ENSG00000111052	ENSG00000139220	ENSG00000072041	ENSG00000173598	ENSG00000139344	ENSG00000111145	ENSG00000059758
TF	Factor: MOVO-B; motif: GNGGGGG	TF:M01104	2.39218e-77	76.6212	10336	5693	3558	19917	ENSG00000186891,ENSG00000176022,ENSG00000107404,ENSG00000205090,ENSG00000228594,ENSG00000189339,ENSG00000078369,ENSG00000169885,ENSG00000187730,ENSG00000067606,ENSG00000157933,ENSG00000116151,ENSG00000157881,ENSG00000197921,ENSG00000157870,ENSG00000158109,ENSG00000130764,ENSG00000169598,ENSG00000198912,ENSG00000196581,ENSG00000131697,ENSG00000116254,ENSG00000158286,ENSG00000116237,ENSG00000158292…
151746	ENSG00000087470	ENSG00000057294	ENSG00000151229	ENSG00000188906	ENSG00000139174	ENSG00000129317	ENSG00000134291	ENSG00000139219	ENSG00000177981	ENSG00000177875	ENSG00000167535	ENSG00000134287	ENSG00000169884	ENSG00000181418	ENSG00000123416	ENSG00000135406	ENSG00000123352	ENSG00000135519	ENSG00000110844	ENSG00000135472	ENSG00000161800	ENSG00000110881	ENSG00000066117	ENSG00000050426	ENSG00000110925	ENSG00000184271	ENSG00000135503	ENSG00000161835	ENSG00000123358	ENSG00000170421	ENSG00000111057	ENSG00000167778	ENSG00000012822	ENSG00000094916	ENSG00000123360	ENSG00000135447	ENSG00000139641	ENSG00000181852	ENSG00000135423	ENSG00000198056	ENSG00000166863	ENSG00000166886	ENSG00000182379	ENSG00000179912	ENSG00000139269	ENSG00000155980	ENSG00000166908	ENSG00000240771	ENSG00000135502
TF	Factor: E2F-4; motif: SNGGGCGGGAANN	TF:M09894	2.72191e-77	76.5651	16345	5693	5117	19917	ENSG00000188976,ENSG00000186891,ENSG00000176022,ENSG00000107404,ENSG00000205090,ENSG00000160075,ENSG00000228594,ENSG00000189339,ENSG00000078369,ENSG00000169885,ENSG00000187730,ENSG00000067606,ENSG00000157933,ENSG00000116151,ENSG00000157881,ENSG00000197921,ENSG00000157870,ENSG00000142606,ENSG00000158109,ENSG00000130764,ENSG00000169598,ENSG00000198912,ENSG00000196581,ENSG00000131697,ENSG00000069424…
196584	ENSG00000133627	ENSG00000130226	ENSG00000157219	ENSG00000164778	ENSG00000164690	ENSG00000105983	ENSG00000009335	ENSG00000105993	ENSG00000155093	ENSG00000146918	ENSG00000117868	ENSG00000180190	ENSG00000104714	ENSG00000198010	ENSG00000176595	ENSG00000036448	ENSG00000183117	ENSG00000147316	ENSG00000275342	ENSG00000147324	ENSG00000184647	ENSG00000104643	ENSG00000154328	ENSG00000186523	ENSG00000145002	ENSG00000164743	ENSG00000185053	ENSG00000104723	ENSG00000155970	ENSG00000104219	ENSG00000155975	ENSG00000003987	ENSG00000104213	ENSG00000175445	ENSG00000147416	ENSG00000168546	ENSG00000158806	ENSG00000158815	ENSG00000158856	ENSG00000275074	ENSG00000197181	ENSG00000104635	ENSG00000158941	ENSG00000147439	ENSG00000179388	ENSG00000008853	ENSG00000147457	ENSG00000197217	ENSG00000104722
TF	Factor: WT1; motif: GNGGGGGCGGGG	TF:M03893	2.59605e-75	74.5857	8336	5693	2976	19917	ENSG00000186891,ENSG00000176022,ENSG00000107404,ENSG00000205090,ENSG00000160075,ENSG00000228594,ENSG00000189339,ENSG00000078369,ENSG00000187730,ENSG00000067606,ENSG00000157933,ENSG00000116151,ENSG00000157881,ENSG00000197921,ENSG00000157870,ENSG00000158109,ENSG00000169598,ENSG00000196581,ENSG00000131697,ENSG00000116254,ENSG00000116237,ENSG00000158292,ENSG00000187017,ENSG00000116273,ENSG00000171735…
167971	ENSG00000167965	ENSG00000184207	ENSG00000162062	ENSG00000162065	ENSG00000185883	ENSG00000140992	ENSG00000162078	ENSG00000059122	ENSG00000131650	ENSG00000127564	ENSG00000085644	ENSG00000103343	ENSG00000167981	ENSG00000188827	ENSG00000126602	ENSG00000162104	ENSG00000089486	ENSG00000102858	ENSG00000140632	ENSG00000067365	ENSG00000187555	ENSG00000182831	ENSG00000183454	ENSG00000166669	ENSG00000166676	ENSG00000038532	ENSG00000175643	ENSG00000184602	ENSG00000153066	ENSG00000122299	ENSG00000171490	ENSG00000237515	ENSG00000186260	ENSG00000140694	ENSG00000166780	ENSG00000011638	ENSG00000103316	ENSG00000058600	ENSG00000140743	ENSG00000122254	ENSG00000103404	ENSG00000103356	ENSG00000103353	ENSG00000166501	ENSG00000182601	ENSG00000169181	ENSG00000188322	ENSG00000184110	ENSG00000183336
TF	Factor: E2F-1; motif: NGGGCGGGARV	TF:M07206	4.70624e-74	73.3273	14705	5693	4711	19917	ENSG00000188976,ENSG00000186891,ENSG00000176022,ENSG00000107404,ENSG00000205090,ENSG00000160075,ENSG00000228594,ENSG00000189339,ENSG00000078369,ENSG00000169885,ENSG00000187730,ENSG00000067606,ENSG00000157933,ENSG00000116151,ENSG00000157881,ENSG00000197921,ENSG00000157870,ENSG00000142606,ENSG00000158109,ENSG00000130764,ENSG00000198912,ENSG00000196581,ENSG00000131697,ENSG00000069424,ENSG00000116254…
167702	ENSG00000160973	ENSG00000167700	ENSG00000160959	ENSG00000170122	ENSG00000080503	ENSG00000147852	ENSG00000106688	ENSG00000205808	ENSG00000120217	ENSG00000175893	ENSG00000164946	ENSG00000155158	ENSG00000164975	ENSG00000107295	ENSG00000155876	ENSG00000155886	ENSG00000171843	ENSG00000198642	ENSG00000147889	ENSG00000198680	ENSG00000137055	ENSG00000086061	ENSG00000165269	ENSG00000165272	ENSG00000165271	ENSG00000010438	ENSG00000107341	ENSG00000137073	ENSG00000165006	ENSG00000205143	ENSG00000213930	ENSG00000122733	ENSG00000137094	ENSG00000165280	ENSG00000198722	ENSG00000198853	ENSG00000107140	ENSG00000070610	ENSG00000137103	ENSG00000185972	ENSG00000159921	ENSG00000137054	ENSG00000147912	ENSG00000175768	ENSG00000122741	ENSG00000137124	ENSG00000137142	ENSG00000106714	ENSG00000215126
TF	Factor: E2F-3:HES-7; motif: NNNSGCGCSNNNNNCRCGYGNN	TF:M08526	4.88149e-74	73.3114	17025	5693	5263	19917	ENSG00000188976,ENSG00000186891,ENSG00000176022,ENSG00000107404,ENSG00000205090,ENSG00000160075,ENSG00000228594,ENSG00000189339,ENSG00000078369,ENSG00000169885,ENSG00000187730,ENSG00000067606,ENSG00000157933,ENSG00000116151,ENSG00000157881,ENSG00000197921,ENSG00000157870,ENSG00000142606,ENSG00000158109,ENSG00000130764,ENSG00000169598,ENSG00000198912,ENSG00000196581,ENSG00000131697,ENSG00000069424…
5249	ENSG00000164597	ENSG00000075790	ENSG00000091137	ENSG00000091140	ENSG00000091136	ENSG00000091129	ENSG00000135241	ENSG00000128512	ENSG00000164604	ENSG00000128573	ENSG00000105976	ENSG00000198898	ENSG00000004866	ENSG00000128534	ENSG00000106013	ENSG00000184408	ENSG00000071243	ENSG00000002745	ENSG00000196937	ENSG00000128610	ENSG00000081803	ENSG00000179603	ENSG00000197157	ENSG00000128594	ENSG00000224940	ENSG00000106348	ENSG00000165055	ENSG00000135248	ENSG00000128596	ENSG00000272899	ENSG00000064419	ENSG00000128578	ENSG00000240204	ENSG00000186591	ENSG00000091732	ENSG00000128607	ENSG00000128510	ENSG00000106477	ENSG00000106484	ENSG00000158623	ENSG00000221866	ENSG00000131558	ENSG00000205060	ENSG00000080802	ENSG00000105887	ENSG00000181072	ENSG00000157680	ENSG00000122778	ENSG00000146858
TF	Factor: RNF96; motif: BCCCGCRGCC	TF:M01199	1.04153e-73	72.9823	8535	5693	3028	19917	ENSG00000188976,ENSG00000176022,ENSG00000107404,ENSG00000205090,ENSG00000160075,ENSG00000228594,ENSG00000189339,ENSG00000078369,ENSG00000187730,ENSG00000067606,ENSG00000157933,ENSG00000116151,ENSG00000157881,ENSG00000197921,ENSG00000157870,ENSG00000158109,ENSG00000130764,ENSG00000169598,ENSG00000196581,ENSG00000131697,ENSG00000069424,ENSG00000116254,ENSG00000158286,ENSG00000158292,ENSG00000097021…
166170	ENSG00000088808	ENSG00000156414	ENSG00000258986	ENSG00000099814	ENSG00000185567	ENSG00000184916	ENSG00000183828	ENSG00000184887	ENSG00000182809	ENSG00000185347	ENSG00000182636	ENSG00000273173	ENSG00000166206	ENSG00000186297	ENSG00000182256	ENSG00000104059	ENSG00000175344	ENSG00000182405	ENSG00000176454	ENSG00000134138	ENSG00000166068	ENSG00000172575	ENSG00000166073	ENSG00000156970	ENSG00000140323	ENSG00000140320	ENSG00000166133	ENSG00000104140	ENSG00000128965	ENSG00000137815	ENSG00000137825	ENSG00000103932	ENSG00000166887	ENSG00000166946	ENSG00000140265	ENSG00000137822	ENSG00000104154	ENSG00000233932	ENSG00000128951	ENSG00000166200	ENSG00000104047	ENSG00000140284	ENSG00000104064	ENSG00000140280	ENSG00000128872	ENSG00000069956	ENSG00000137875	ENSG00000069966	ENSG00000197535
TF	Factor: Sp1; motif: GGGGCGGGGC	TF:M00931	1.20926e-73	72.9175	10344	5693	3546	19917	ENSG00000188976,ENSG00000186891,ENSG00000176022,ENSG00000107404,ENSG00000205090,ENSG00000160075,ENSG00000228594,ENSG00000189339,ENSG00000078369,ENSG00000187730,ENSG00000067606,ENSG00000157933,ENSG00000116151,ENSG00000157881,ENSG00000197921,ENSG00000157870,ENSG00000158109,ENSG00000130764,ENSG00000169598,ENSG00000198912,ENSG00000196581,ENSG00000131697,ENSG00000116254,ENSG00000158286,ENSG00000116237…
134285	ENSG00000134287	ENSG00000169884	ENSG00000181418	ENSG00000167550	ENSG00000123416	ENSG00000123352	ENSG00000135519	ENSG00000110844	ENSG00000135472	ENSG00000110881	ENSG00000066117	ENSG00000110925	ENSG00000184271	ENSG00000135503	ENSG00000161835	ENSG00000123358	ENSG00000170442	ENSG00000170421	ENSG00000111057	ENSG00000167778	ENSG00000167779	ENSG00000012822	ENSG00000094916	ENSG00000135447	ENSG00000181852	ENSG00000139645	ENSG00000062485	ENSG00000110958	ENSG00000198056	ENSG00000166886	ENSG00000182379	ENSG00000139269	ENSG00000155980	ENSG00000166908	ENSG00000240771	ENSG00000135454	ENSG00000135439	ENSG00000139266	ENSG00000111012	ENSG00000166896	ENSG00000111110	ENSG00000174206	ENSG00000184575	ENSG00000135677	ENSG00000111490	ENSG00000156076	ENSG00000135643	ENSG00000072657	ENSG00000166006
TF	Factor: E2F-1:Elk-1; motif: SGCGCSNNAMCGGAAGT	TF:M08205	1.41646e-73	72.8488	14560	5693	4673	19917	ENSG00000188976,ENSG00000186891,ENSG00000176022,ENSG00000107404,ENSG00000205090,ENSG00000160075,ENSG00000228594,ENSG00000189339,ENSG00000078369,ENSG00000169885,ENSG00000187730,ENSG00000067606,ENSG00000157933,ENSG00000116151,ENSG00000157881,ENSG00000197921,ENSG00000157870,ENSG00000158109,ENSG00000130764,ENSG00000169598,ENSG00000198912,ENSG00000196581,ENSG00000131697,ENSG00000069424,ENSG00000116254…
176956	ENSG00000104524	ENSG00000183309	ENSG00000181135	ENSG00000180921	ENSG00000178719	ENSG00000179832	ENSG00000260428	ENSG00000261678	ENSG00000167702	ENSG00000160973	ENSG00000160972	ENSG00000167700	ENSG00000160959	ENSG00000170122	ENSG00000080503	ENSG00000147852	ENSG00000168263	ENSG00000106688	ENSG00000205808	ENSG00000120217	ENSG00000153714	ENSG00000175893	ENSG00000155158	ENSG00000164975	ENSG00000107295	ENSG00000155876	ENSG00000171843	ENSG00000198642	ENSG00000147889	ENSG00000107105	ENSG00000198680	ENSG00000137055	ENSG00000086061	ENSG00000165269	ENSG00000165272	ENSG00000165271	ENSG00000010438	ENSG00000107341	ENSG00000137073	ENSG00000205143	ENSG00000213930	ENSG00000122733	ENSG00000137094	ENSG00000165280	ENSG00000198722	ENSG00000198853	ENSG00000107140	ENSG00000070610	ENSG00000185972
TF	Factor: IRX-1; motif: NACRYNNNNNNNNRYGNN; match class: 1	TF:M11018_1	2.51155e-72	71.6001	16079	5693	5041	19917	ENSG00000188976,ENSG00000186891,ENSG00000176022,ENSG00000107404,ENSG00000205090,ENSG00000160075,ENSG00000228594,ENSG00000189339,ENSG00000078369,ENSG00000169885,ENSG00000187730,ENSG00000067606,ENSG00000157933,ENSG00000116151,ENSG00000157881,ENSG00000197921,ENSG00000157870,ENSG00000158109,ENSG00000130764,ENSG00000169598,ENSG00000198912,ENSG00000196581,ENSG00000131697,ENSG00000116254,ENSG00000158286…
33100	ENSG00000082014	ENSG00000127377	ENSG00000106617	ENSG00000178234	ENSG00000196584	ENSG00000133627	ENSG00000130226	ENSG00000157219	ENSG00000164778	ENSG00000164690	ENSG00000105983	ENSG00000009335	ENSG00000105993	ENSG00000155093	ENSG00000146918	ENSG00000117868	ENSG00000180190	ENSG00000104714	ENSG00000198010	ENSG00000176595	ENSG00000036448	ENSG00000183117	ENSG00000147316	ENSG00000275342	ENSG00000147324	ENSG00000104643	ENSG00000154328	ENSG00000186523	ENSG00000145002	ENSG00000164741	ENSG00000164743	ENSG00000185053	ENSG00000104723	ENSG00000155970	ENSG00000104219	ENSG00000155975	ENSG00000003987	ENSG00000104213	ENSG00000156006	ENSG00000175445	ENSG00000147416	ENSG00000158806	ENSG00000158815	ENSG00000158856	ENSG00000275074	ENSG00000168490	ENSG00000197181	ENSG00000104635	ENSG00000158941
TF	Factor: E2F-1; motif: NGGGCGGGARV; match class: 1	TF:M07206_1	5.23586e-72	71.281	10947	5693	3708	19917	ENSG00000188976,ENSG00000176022,ENSG00000107404,ENSG00000205090,ENSG00000160075,ENSG00000228594,ENSG00000189339,ENSG00000078369,ENSG00000169885,ENSG00000187730,ENSG00000067606,ENSG00000157933,ENSG00000116151,ENSG00000157881,ENSG00000197921,ENSG00000157870,ENSG00000158109,ENSG00000130764,ENSG00000198912,ENSG00000196581,ENSG00000131697,ENSG00000116254,ENSG00000158286,ENSG00000158292,ENSG00000187017…
149260	ENSG00000149269	ENSG00000178301	ENSG00000151364	ENSG00000159063	ENSG00000137513	ENSG00000149256	ENSG00000151376	ENSG00000214376	ENSG00000110218	ENSG00000123901	ENSG00000149212	ENSG00000137672	ENSG00000110318	ENSG00000152578	ENSG00000170903	ENSG00000182359	ENSG00000149313	ENSG00000152402	ENSG00000110675	ENSG00000185742	ENSG00000137727	ENSG00000170145	ENSG00000086827	ENSG00000182985	ENSG00000137726	ENSG00000177098	ENSG00000160588	ENSG00000110367	ENSG00000137700	ENSG00000149428	ENSG00000160695	ENSG00000172375	ENSG00000172273	ENSG00000172350	ENSG00000036672	ENSG00000149403	ENSG00000137642	ENSG00000154127	ENSG00000109944	ENSG00000109971	ENSG00000166250	ENSG00000023171	ENSG00000166257	ENSG00000154146	ENSG00000165495	ENSG00000134910	ENSG00000198331	ENSG00000109832	ENSG00000064309
TF	Factor: Sp1; motif: NNGGGGCGGGGNN	TF:M00932	1.30988e-71	70.8828	10490	5693	3579	19917	ENSG00000188976,ENSG00000186891,ENSG00000176022,ENSG00000107404,ENSG00000205090,ENSG00000160075,ENSG00000228594,ENSG00000189339,ENSG00000078369,ENSG00000187730,ENSG00000067606,ENSG00000157933,ENSG00000116151,ENSG00000157881,ENSG00000197921,ENSG00000157870,ENSG00000142606,ENSG00000158109,ENSG00000130764,ENSG00000169598,ENSG00000198912,ENSG00000196581,ENSG00000131697,ENSG00000116254,ENSG00000158286…
170456	ENSG00000151743	ENSG00000151746	ENSG00000057294	ENSG00000139116	ENSG00000151229	ENSG00000188906	ENSG00000018236	ENSG00000139174	ENSG00000129317	ENSG00000139173	ENSG00000184613	ENSG00000139219	ENSG00000152556	ENSG00000177981	ENSG00000167535	ENSG00000134285	ENSG00000134287	ENSG00000169884	ENSG00000181418	ENSG00000167550	ENSG00000123416	ENSG00000123352	ENSG00000135519	ENSG00000110844	ENSG00000135472	ENSG00000110881	ENSG00000066117	ENSG00000110925	ENSG00000184271	ENSG00000135503	ENSG00000161835	ENSG00000123358	ENSG00000170442	ENSG00000170421	ENSG00000111057	ENSG00000167778	ENSG00000167779	ENSG00000012822	ENSG00000094916	ENSG00000135447	ENSG00000181852	ENSG00000139645	ENSG00000062485	ENSG00000110958	ENSG00000198056	ENSG00000166886	ENSG00000182379	ENSG00000139269	ENSG00000166986
TF	Factor: p300; motif: ACNTCCG; match class: 1	TF:M04826_1	1.93919e-71	70.7124	15413	5693	4878	19917	ENSG00000188976,ENSG00000186891,ENSG00000176022,ENSG00000107404,ENSG00000205090,ENSG00000160075,ENSG00000228594,ENSG00000189339,ENSG00000078369,ENSG00000187730,ENSG00000067606,ENSG00000157933,ENSG00000116151,ENSG00000157881,ENSG00000197921,ENSG00000157870,ENSG00000142606,ENSG00000158109,ENSG00000130764,ENSG00000169598,ENSG00000198912,ENSG00000196581,ENSG00000131697,ENSG00000069424,ENSG00000116254…
147481	ENSG00000082556	ENSG00000047249	ENSG00000206579	ENSG00000170786	ENSG00000181195	ENSG00000104331	ENSG00000169122	ENSG00000215114	ENSG00000137575	ENSG00000035681	ENSG00000178538	ENSG00000177182	ENSG00000137563	ENSG00000180828	ENSG00000172817	ENSG00000178460	ENSG00000221947	ENSG00000178860	ENSG00000040341	ENSG00000104343	ENSG00000175606	ENSG00000104369	ENSG00000104381	ENSG00000104435	ENSG00000164683	ENSG00000133731	ENSG00000104231	ENSG00000104497	ENSG00000184672	ENSG00000123124	ENSG00000164823	ENSG00000123119	ENSG00000188343	ENSG00000164951	ENSG00000156170	ENSG00000156471	ENSG00000180543	ENSG00000147649	ENSG00000104341	ENSG00000177459	ENSG00000104356	ENSG00000104361	ENSG00000156486	ENSG00000164924	ENSG00000120963	ENSG00000104490	ENSG00000155096	ENSG00000155097	ENSG00000164933
TF	Factor: sp4; motif: NNGNARGRGGCGGRGCNNRR	TF:M10072	1.11948e-70	69.951	10571	5693	3598	19917	ENSG00000188976,ENSG00000186891,ENSG00000176022,ENSG00000107404,ENSG00000205090,ENSG00000228594,ENSG00000189339,ENSG00000078369,ENSG00000187730,ENSG00000067606,ENSG00000157933,ENSG00000116151,ENSG00000157881,ENSG00000197921,ENSG00000157870,ENSG00000142606,ENSG00000158109,ENSG00000169598,ENSG00000196581,ENSG00000131697,ENSG00000116254,ENSG00000158286,ENSG00000116237,ENSG00000158292,ENSG00000187017…
170456	ENSG00000151743	ENSG00000151746	ENSG00000087470	ENSG00000057294	ENSG00000139116	ENSG00000151229	ENSG00000018236	ENSG00000129317	ENSG00000139173	ENSG00000184613	ENSG00000139211	ENSG00000139219	ENSG00000152556	ENSG00000177981	ENSG00000139620	ENSG00000167535	ENSG00000134285	ENSG00000169884	ENSG00000181418	ENSG00000167550	ENSG00000123416	ENSG00000123352	ENSG00000135519	ENSG00000110844	ENSG00000135472	ENSG00000110881	ENSG00000066117	ENSG00000110925	ENSG00000184271	ENSG00000050438	ENSG00000135503	ENSG00000161835	ENSG00000123358	ENSG00000170442	ENSG00000205426	ENSG00000170421	ENSG00000111057	ENSG00000167778	ENSG00000167779	ENSG00000012822	ENSG00000094916	ENSG00000135447	ENSG00000181852	ENSG00000139645	ENSG00000062485	ENSG00000135423	ENSG00000110958	ENSG00000198056	ENSG00000166886
TF	Factor: pax-6; motif: NYACGCNYSANYGMNCN; match class: 1	TF:M11882_1	9.61281e-69	68.0171	11519	5693	3853	19917	ENSG00000188976,ENSG00000176022,ENSG00000107404,ENSG00000205090,ENSG00000160075,ENSG00000228594,ENSG00000189339,ENSG00000078369,ENSG00000187730,ENSG00000067606,ENSG00000157933,ENSG00000116151,ENSG00000157881,ENSG00000197921,ENSG00000157870,ENSG00000158109,ENSG00000130764,ENSG00000169598,ENSG00000196581,ENSG00000131697,ENSG00000069424,ENSG00000116254,ENSG00000158286,ENSG00000116237,ENSG00000158292…
110107	ENSG00000006118	ENSG00000013725	ENSG00000167992	ENSG00000204950	ENSG00000011347	ENSG00000134780	ENSG00000149503	ENSG00000185085	ENSG00000168000	ENSG00000162188	ENSG00000162222	ENSG00000168569	ENSG00000133316	ENSG00000188070	ENSG00000168005	ENSG00000072518	ENSG00000167771	ENSG00000167770	ENSG00000168439	ENSG00000182450	ENSG00000173153	ENSG00000110076	ENSG00000068831	ENSG00000168067	ENSG00000068971	ENSG00000149823	ENSG00000174276	ENSG00000014216	ENSG00000142186	ENSG00000172803	ENSG00000175573	ENSG00000175376	ENSG00000175315	ENSG00000175115	ENSG00000174996	ENSG00000174871	ENSG00000174684	ENSG00000174669	ENSG00000174576	ENSG00000174516	ENSG00000174080	ENSG00000173715	ENSG00000173227	ENSG00000173020	ENSG00000172932	ENSG00000172531	ENSG00000175463	ENSG00000110697	ENSG00000132744
TF	Factor: EGR; motif: CGCCCCCGCNN	TF:M08878	2.86321e-68	67.5431	7527	5693	2709	19917	ENSG00000188976,ENSG00000186891,ENSG00000176022,ENSG00000107404,ENSG00000205090,ENSG00000228594,ENSG00000189339,ENSG00000078369,ENSG00000187730,ENSG00000067606,ENSG00000157933,ENSG00000116151,ENSG00000157881,ENSG00000197921,ENSG00000157870,ENSG00000142606,ENSG00000158109,ENSG00000169598,ENSG00000196581,ENSG00000116254,ENSG00000158286,ENSG00000158292,ENSG00000187017,ENSG00000215788,ENSG00000116273…
109107	ENSG00000173065	ENSG00000132589	ENSG00000167536	ENSG00000063015	ENSG00000108262	ENSG00000167549	ENSG00000185158	ENSG00000126858	ENSG00000141314	ENSG00000176749	ENSG00000181291	ENSG00000278311	ENSG00000278535	ENSG00000276023	ENSG00000274211	ENSG00000273604	ENSG00000276293	ENSG00000002834	ENSG00000067191	ENSG00000108306	ENSG00000108352	ENSG00000128422	ENSG00000173805	ENSG00000089558	ENSG00000033627	ENSG00000267060	ENSG00000198863	ENSG00000161647	ENSG00000108852	ENSG00000108840	ENSG00000168591	ENSG00000087152	ENSG00000161682	ENSG00000180336	ENSG00000073670	ENSG00000186834	ENSG00000168517	ENSG00000184922	ENSG00000006062	ENSG00000120088	ENSG00000176681	ENSG00000238083	ENSG00000073969	ENSG00000108379	ENSG00000179673	ENSG00000108424	ENSG00000189120	ENSG00000082641	ENSG00000159202
TF	Factor: BTEB1; motif: GGGGGCGGGGCNGSGGGNGS	TF:M09723	1.48899e-67	66.8271	10217	5693	3486	19917	ENSG00000188976,ENSG00000176022,ENSG00000107404,ENSG00000205090,ENSG00000160075,ENSG00000228594,ENSG00000189339,ENSG00000078369,ENSG00000187730,ENSG00000067606,ENSG00000157933,ENSG00000116151,ENSG00000157881,ENSG00000197921,ENSG00000157870,ENSG00000142606,ENSG00000158109,ENSG00000130764,ENSG00000198912,ENSG00000196581,ENSG00000131697,ENSG00000069424,ENSG00000116254,ENSG00000116237,ENSG00000158292…
72657	ENSG00000166006	ENSG00000091039	ENSG00000111052	ENSG00000139220	ENSG00000173598	ENSG00000139344	ENSG00000111145	ENSG00000059758	ENSG00000185046	ENSG00000111647	ENSG00000111670	ENSG00000111696	ENSG00000166598	ENSG00000120820	ENSG00000198431	ENSG00000151131	ENSG00000235162	ENSG00000074590	ENSG00000111785	ENSG00000151136	ENSG00000110851	ENSG00000110880	ENSG00000151148	ENSG00000174437	ENSG00000111231	ENSG00000204856	ENSG00000196850	ENSG00000111249	ENSG00000173064	ENSG00000135144	ENSG00000123064	ENSG00000139405	ENSG00000151176	ENSG00000111412	ENSG00000135119	ENSG00000135116	ENSG00000174989	ENSG00000088992	ENSG00000135108	ENSG00000171435	ENSG00000111445	ENSG00000135090	ENSG00000111707	ENSG00000139767	ENSG00000122966	ENSG00000135127	ENSG00000111737	ENSG00000175970	ENSG00000157837
TF	Factor: ETF; motif: CCCCGCCCCYN; match class: 1	TF:M07039_1	2.58986e-67	66.5867	13735	5693	4440	19917	ENSG00000188976,ENSG00000186891,ENSG00000176022,ENSG00000107404,ENSG00000205090,ENSG00000160075,ENSG00000228594,ENSG00000189339,ENSG00000078369,ENSG00000169885,ENSG00000187730,ENSG00000067606,ENSG00000157933,ENSG00000116151,ENSG00000157881,ENSG00000197921,ENSG00000157870,ENSG00000142606,ENSG00000158109,ENSG00000130764,ENSG00000169598,ENSG00000198912,ENSG00000196581,ENSG00000131697,ENSG00000069424…
197694	ENSG00000160445	ENSG00000107021	ENSG00000175283	ENSG00000119383	ENSG00000136827	ENSG00000136878	ENSG00000148358	ENSG00000107130	ENSG00000148357	ENSG00000130707	ENSG00000130711	ENSG00000130720	ENSG00000130714	ENSG00000107263	ENSG00000107290	ENSG00000165699	ENSG00000160326	ENSG00000197859	ENSG00000196990	ENSG00000123454	ENSG00000196363	ENSG00000130635	ENSG00000130558	ENSG00000165643	ENSG00000107147	ENSG00000130559	ENSG00000238227	ENSG00000148396	ENSG00000165716	ENSG00000177984	ENSG00000213213	ENSG00000232434	ENSG00000159069	ENSG00000177239	ENSG00000176884	ENSG00000212864	ENSG00000197191	ENSG00000188229	ENSG00000165802	ENSG00000130653	ENSG00000165724	ENSG00000148408	ENSG00000261456	ENSG00000015171	ENSG00000151240	ENSG00000107929	ENSG00000047056	ENSG00000067057	ENSG00000107959
TF	Factor: MOVO-B; motif: GNGGGGG; match class: 1	TF:M01104_1	1.49478e-66	65.8254	5650	5693	2131	19917	ENSG00000186891,ENSG00000176022,ENSG00000107404,ENSG00000205090,ENSG00000228594,ENSG00000189339,ENSG00000078369,ENSG00000169885,ENSG00000187730,ENSG00000067606,ENSG00000157933,ENSG00000116151,ENSG00000157881,ENSG00000197921,ENSG00000157870,ENSG00000158109,ENSG00000130764,ENSG00000169598,ENSG00000198912,ENSG00000196581,ENSG00000131697,ENSG00000116254,ENSG00000116237,ENSG00000158292,ENSG00000215788…
149970	ENSG00000165186	ENSG00000130741	ENSG00000147036	ENSG00000156298	ENSG00000147044	ENSG00000147121	ENSG00000065923	ENSG00000102225	ENSG00000102226	ENSG00000147124	ENSG00000008056	ENSG00000126767	ENSG00000068438	ENSG00000102312	ENSG00000068354	ENSG00000101940	ENSG00000102109	ENSG00000102096	ENSG00000068308	ENSG00000102003	ENSG00000102001	ENSG00000049769	ENSG00000273820	ENSG00000122824	ENSG00000196368	ENSG00000187243	ENSG00000268350	ENSG00000184194	ENSG00000184205	ENSG00000247746	ENSG00000131089	ENSG00000181191	ENSG00000082458	ENSG00000147130	ENSG00000242732	ENSG00000184388	ENSG00000186288	ENSG00000204116	ENSG00000147100	ENSG00000131263	ENSG00000085224	ENSG00000102144	ENSG00000072133	ENSG00000147180	ENSG00000165194	ENSG00000184515	ENSG00000158301	ENSG00000198908	ENSG00000068366
TF	Factor: Egr-1; motif: GCGGGGGCGG	TF:M07354	6.48138e-66	65.1883	7842	5693	2793	19917	ENSG00000188976,ENSG00000186891,ENSG00000176022,ENSG00000107404,ENSG00000205090,ENSG00000160075,ENSG00000228594,ENSG00000189339,ENSG00000078369,ENSG00000187730,ENSG00000067606,ENSG00000157933,ENSG00000116151,ENSG00000157881,ENSG00000197921,ENSG00000157870,ENSG00000158109,ENSG00000169598,ENSG00000196581,ENSG00000131697,ENSG00000116254,ENSG00000158292,ENSG00000187017,ENSG00000215788,ENSG00000116273…
103264	ENSG00000154118	ENSG00000104731	ENSG00000174177	ENSG00000167513	ENSG00000158792	ENSG00000187741	ENSG00000204991	ENSG00000141002	ENSG00000258947	ENSG00000177946	ENSG00000003249	ENSG00000272636	ENSG00000179409	ENSG00000159842	ENSG00000167703	ENSG00000167705	ENSG00000185924	ENSG00000141258	ENSG00000070444	ENSG00000132359	ENSG00000083454	ENSG00000004660	ENSG00000132388	ENSG00000183018	ENSG00000132382	ENSG00000182327	ENSG00000141503	ENSG00000205710	ENSG00000108509	ENSG00000091622	ENSG00000108590	ENSG00000256806	ENSG00000132535	ENSG00000006047	ENSG00000215041	ENSG00000161956	ENSG00000129245	ENSG00000108947	ENSG00000170049	ENSG00000220205	ENSG00000133026	ENSG00000007237	ENSG00000065559	ENSG00000125430	ENSG00000011295	ENSG00000166582	ENSG00000170160	ENSG00000179598	ENSG00000108557
TF	Factor: E2F-2; motif: NWTTTGGCGCCAWWNN	TF:M11530	9.69048e-65	64.0137	14722	5693	4684	19917	ENSG00000188976,ENSG00000186891,ENSG00000176022,ENSG00000107404,ENSG00000205090,ENSG00000160075,ENSG00000228594,ENSG00000189339,ENSG00000078369,ENSG00000067606,ENSG00000157933,ENSG00000116151,ENSG00000157881,ENSG00000197921,ENSG00000157870,ENSG00000158109,ENSG00000130764,ENSG00000169598,ENSG00000198912,ENSG00000196581,ENSG00000131697,ENSG00000069424,ENSG00000116254,ENSG00000158286,ENSG00000116237…
170122	ENSG00000080503	ENSG00000147852	ENSG00000168263	ENSG00000106688	ENSG00000205808	ENSG00000120217	ENSG00000153714	ENSG00000175893	ENSG00000164946	ENSG00000155158	ENSG00000164975	ENSG00000107295	ENSG00000155876	ENSG00000171843	ENSG00000198642	ENSG00000107105	ENSG00000198680	ENSG00000137055	ENSG00000086061	ENSG00000165271	ENSG00000107341	ENSG00000137073	ENSG00000165006	ENSG00000205143	ENSG00000213930	ENSG00000122733	ENSG00000137094	ENSG00000165280	ENSG00000198853	ENSG00000107140	ENSG00000070610	ENSG00000137103	ENSG00000159921	ENSG00000137054	ENSG00000147912	ENSG00000175768	ENSG00000122741	ENSG00000137124	ENSG00000137142	ENSG00000106714	ENSG00000283886	ENSG00000215126	ENSG00000172014	ENSG00000147996	ENSG00000274349	ENSG00000196873	ENSG00000107242	ENSG00000187866	ENSG00000107282
TF	Factor: Kaiso; motif: GCMGGGRGCRGS; match class: 1	TF:M03876_1	9.70267e-65	64.0131	9160	5693	3173	19917	ENSG00000186891,ENSG00000176022,ENSG00000107404,ENSG00000205090,ENSG00000160075,ENSG00000228594,ENSG00000078369,ENSG00000187730,ENSG00000067606,ENSG00000157933,ENSG00000157881,ENSG00000197921,ENSG00000157870,ENSG00000142606,ENSG00000158109,ENSG00000130764,ENSG00000169598,ENSG00000196581,ENSG00000131697,ENSG00000069424,ENSG00000116254,ENSG00000158286,ENSG00000158292,ENSG00000187017,ENSG00000215788…
[truncated: 1,442 more rows]
[truncated: 3,539 more columns]
