# Supplementary material for: A conditional gene-based association framework integrating isoform-level eQTL data reveals new susceptibility genes for schizophrenia
Source: eLife. 2022 Apr 12;11:e70779. doi: 10.7554/eLife.70779 (PMC9005191; doi:10.7554/eLife.70779)
Supplement: Table 2—source data 1. [file elife-70779-table2-data1.xlsx]

## Sheet: eDESE_dist_gene
Tissue significance estimated by eDESE:dist based on the gene-level expression profiles.
TissueName	RobustRegressionZ	AveragedLog(p)
Brain-FrontalCortexBA9	1.3e-17	16.9001
Brain-AnteriorcingulatecortexBA24	2.4e-17	16.6135
Brain-Cortex	1.6e-16	15.7993
Brain-Hippocampus	1.9e-13	12.7214
Brain-Caudatebasalganglia	5.8e-13	12.2375
Brain-Putamenbasalganglia	6.5e-13	12.1892
Brain-Amygdala	1.4e-12	11.8587
Brain-Nucleusaccumbensbasalganglia	5.6e-12	11.2481
Brain-Substantianigra	2.4e-10	9.61401
Brain-Hypothalamus	4.3e-10	9.37031
Brain-CerebellarHemisphere	7.7e-09	8.11381
Brain-Cerebellum	7.4e-08	7.12899
Brain-Spinalcordcervicalc-1	3.3e-07	6.47702
Artery-Tibial	0.1	0.998716
AdrenalGland	0.15	0.826613
Artery-Coronary	0.17	0.775087
Heart-AtrialAppendage	0.27	0.571172
Testis	0.29	0.532129
Nerve-Tibial	0.3	0.521439
Artery-Aorta	0.34	0.466591
Spleen	0.44	0.357315
Muscle-Skeletal	0.54	0.268411
Cells-Culturedfibroblasts	0.61	0.216573
Colon-Sigmoid	0.64	0.192839
Cervix-Endocervix	0.68	0.166932
Heart-LeftVentricle	0.71	0.151076
Cells-EBV-transformedlymphocytes	0.8	0.0968694
Cervix-Ectocervix	0.83	0.0794301
Colon-Transverse	0.86	0.0671335
SmallIntestine-TerminalIleum	0.86	0.0660245
Thyroid	0.87	0.0606272
Breast-MammaryTissue	0.89	0.0489562
Adipose-Subcutaneous	0.91	0.0416446
Vagina	0.93	0.0337566
Esophagus-Muscularis	0.93	0.0311225
Esophagus-GastroesophagealJunction	0.93	0.0309725
Kidney-Medulla	0.94	0.0260093
Uterus	0.94	0.0248271
Kidney-Cortex	0.94	0.0246367
Adipose-VisceralOmentum	0.96	0.0192066
Lung	0.96	0.0170505
Bladder	0.96	0.0165408
Ovary	0.98	0.00887506
FallopianTube	0.99	0.00448497
Prostate	1	0.00212689
MinorSalivaryGland	1	0.000601143
Liver	1	0.00035644
Skin-SunExposedLowerleg	1	0.000304902
Esophagus-Mucosa	1	7.55906e-05
Skin-NotSunExposedSuprapubic	1	3.83581e-05
