# Supplementary material for: A conditional gene-based association framework integrating isoform-level eQTL data reveals new susceptibility genes for schizophrenia
Source: eLife. 2022 Apr 12;11:e70779. doi: 10.7554/eLife.70779 (PMC9005191; doi:10.7554/eLife.70779)
Supplement: Table 2—source data 2. [file elife-70779-table2-data2.xlsx]

## Sheet: eDESE_dist_transcript
Tissue significance estimated by eDESE:dist based on the isoform-level expression profiles.
TissueName	RobustRegressionZ	AveragedLog(p)
Brain-FrontalCortexBA9	3.3e-23	22.4862
Brain-AnteriorcingulatecortexBA24	3.5e-22	21.4602
Brain-Cortex	4e-22	21.3981
Brain-Hippocampus	2.1e-19	18.674
Brain-Amygdala	2.6e-18	17.5811
Brain-Nucleusaccumbensbasalganglia	8.4e-18	17.078
Brain-Putamenbasalganglia	8.6e-18	17.0668
Brain-Caudatebasalganglia	4.9e-17	16.307
Brain-Hypothalamus	4.4e-16	15.3591
Brain-CerebellarHemisphere	2e-15	14.7027
Brain-Substantianigra	2.5e-15	14.6008
Brain-Cerebellum	6.4e-15	14.1929
Brain-Spinalcordcervicalc-1	9.9e-12	11.0052
AdrenalGland	4.7e-05	4.32528
Heart-AtrialAppendage	0.00029	3.53678
Colon-Sigmoid	0.00037	3.43407
Testis	0.00048	3.32161
Cells-Culturedfibroblasts	0.0028	2.54718
Artery-Coronary	0.0041	2.38263
Esophagus-GastroesophagealJunction	0.008	2.0948
Muscle-Skeletal	0.016	1.79986
Cervix-Endocervix	0.017	1.77651
Artery-Tibial	0.017	1.76572
Esophagus-Muscularis	0.018	1.75606
Artery-Aorta	0.019	1.73236
Spleen	0.019	1.7237
Heart-LeftVentricle	0.036	1.4383
Cervix-Ectocervix	0.046	1.3391
Cells-EBV-transformedlymphocytes	0.055	1.25952
Thyroid	0.066	1.18302
Uterus	0.072	1.14437
Nerve-Tibial	0.075	1.12707
Colon-Transverse	0.086	1.06759
Vagina	0.088	1.05579
Kidney-Cortex	0.1	0.989996
Bladder	0.11	0.971939
Kidney-Medulla	0.12	0.912265
Prostate	0.16	0.800564
Adipose-Subcutaneous	0.17	0.773201
FallopianTube	0.19	0.721766
SmallIntestine-TerminalIleum	0.2	0.69111
Adipose-VisceralOmentum	0.23	0.637073
Ovary	0.28	0.549116
Breast-MammaryTissue	0.37	0.434548
Lung	0.59	0.230459
Liver	0.68	0.164612
MinorSalivaryGland	0.7	0.153606
Esophagus-Mucosa	0.83	0.079317
Skin-SunExposedLowerleg	0.9	0.0447667
Skin-NotSunExposedSuprapubic	0.94	0.0266952
