# Supplementary material for: A conditional gene-based association framework integrating isoform-level eQTL data reveals new susceptibility genes for schizophrenia
Source: eLife. 2022 Apr 12;11:e70779. doi: 10.7554/eLife.70779 (PMC9005191; doi:10.7554/eLife.70779)
Supplement: Table 2—source data 3. [file elife-70779-table2-data3.xlsx]

## Sheet: eDESE_gene_eQTLs
Tissue significance estimated by eDESE:gene based on the gene-level eQTLs of each brain region.
Brain_Amygdala_eur
TissueName	RobustRegressionZ	AveragedLog(p)
Brain-FrontalCortexBA9	7e-10	9.15324
Brain-Cortex	1.1e-09	8.9472
Brain-Putamenbasalganglia	3e-09	8.51705
Brain-AnteriorcingulatecortexBA24	3.1e-09	8.51457
Brain-Hippocampus	2.5e-08	7.59838
Brain-Caudatebasalganglia	5.5e-08	7.2594
Brain-Amygdala	1.2e-07	6.92615
Brain-Nucleusaccumbensbasalganglia	2.2e-07	6.66431
Brain-Substantianigra	2.4e-06	5.62341
Brain-Spinalcordcervicalc-1	2.6e-05	4.59127
Brain-Hypothalamus	4.2e-05	4.37372
Brain-CerebellarHemisphere	0.00013	3.8774
Brain-Cerebellum	0.00051	3.28867
Testis	0.3	0.528286
Colon-Sigmoid	0.41	0.385575
Muscle-Skeletal	0.46	0.333628
Esophagus-Muscularis	0.51	0.292283
Kidney-Cortex	0.57	0.243057
Colon-Transverse	0.57	0.242038
Cells-Culturedfibroblasts	0.66	0.180926
Heart-LeftVentricle	0.68	0.170366
Prostate	0.71	0.151534
Esophagus-GastroesophagealJunction	0.71	0.146047
AdrenalGland	0.74	0.133444
SmallIntestine-TerminalIleum	0.75	0.123731
Heart-AtrialAppendage	0.75	0.122652
Skin-NotSunExposedSuprapubic	0.78	0.110537
Skin-SunExposedLowerleg	0.79	0.103253
Nerve-Tibial	0.79	0.100299
Liver	0.8	0.0943777
Uterus	0.81	0.0937914
Cervix-Endocervix	0.82	0.088448
Spleen	0.83	0.0787597
Kidney-Medulla	0.87	0.0601852
Bladder	0.89	0.0489993
Cervix-Ectocervix	0.91	0.0407573
Cells-EBV-transformedlymphocytes	0.93	0.0321742
FallopianTube	0.93	0.0294586
Thyroid	0.96	0.018298
Breast-MammaryTissue	0.96	0.0176982
Vagina	0.97	0.0152863
Artery-Tibial	0.97	0.0126942
Esophagus-Mucosa	0.98	0.00758496
MinorSalivaryGland	0.99	0.00485326
Ovary	0.99	0.00289191
Adipose-Subcutaneous	0.99	0.00282681
Lung	1	0.000947784
Adipose-VisceralOmentum	1	0.000943442
Artery-Coronary	1	0.000665359
Artery-Aorta	1	0.000480191
Brain_Anterior_cingulate_cortex_BA24_eur
TissueName	RobustRegressionZ	AveragedLog(p)
Brain-Cortex	2.2e-09	8.65455
Brain-FrontalCortexBA9	3.7e-09	8.43497
Brain-AnteriorcingulatecortexBA24	1.2e-07	6.92886
Brain-Cerebellum	8e-07	6.09612
Brain-Putamenbasalganglia	1.2e-06	5.90739
Brain-Caudatebasalganglia	1.4e-06	5.86179
Brain-CerebellarHemisphere	1.6e-06	5.80881
Brain-Amygdala	1.9e-06	5.71992
Brain-Nucleusaccumbensbasalganglia	2e-06	5.70108
Brain-Hippocampus	2e-05	4.70728
Brain-Hypothalamus	3.8e-05	4.42502
Brain-Substantianigra	5.7e-05	4.24077
Brain-Spinalcordcervicalc-1	0.00075	3.12265
Colon-Sigmoid	0.035	1.45767
Heart-LeftVentricle	0.088	1.05495
Kidney-Cortex	0.22	0.650577
Colon-Transverse	0.24	0.617817
Esophagus-GastroesophagealJunction	0.25	0.604174
Heart-AtrialAppendage	0.26	0.585168
Esophagus-Muscularis	0.27	0.56385
Testis	0.28	0.552528
Kidney-Medulla	0.4	0.401012
Cells-EBV-transformedlymphocytes	0.42	0.3819
Liver	0.46	0.333137
Muscle-Skeletal	0.51	0.291038
AdrenalGland	0.59	0.231481
Prostate	0.61	0.217956
Bladder	0.76	0.117146
Thyroid	0.77	0.112217
Cells-Culturedfibroblasts	0.81	0.0917754
SmallIntestine-TerminalIleum	0.81	0.0902113
Nerve-Tibial	0.82	0.087439
Artery-Coronary	0.83	0.0799479
FallopianTube	0.88	0.0554539
Lung	0.9	0.0453243
Spleen	0.91	0.0390175
Artery-Tibial	0.92	0.0373985
Cervix-Endocervix	0.92	0.0364138
Uterus	0.92	0.0355491
Artery-Aorta	0.95	0.0243635
Esophagus-Mucosa	0.95	0.0239997
Skin-SunExposedLowerleg	0.96	0.0166925
Cervix-Ectocervix	0.97	0.0121277
Vagina	0.97	0.0114598
Skin-NotSunExposedSuprapubic	0.98	0.0107901
Ovary	0.99	0.0056188
Adipose-VisceralOmentum	1	0.00113033
Breast-MammaryTissue	1	0.000347492
MinorSalivaryGland	1	0.000237416
Adipose-Subcutaneous	1	0.000211698
Brain_Caudate_basal_ganglia_eur
TissueName	RobustRegressionZ	AveragedLog(p)
Brain-Putamenbasalganglia	4.5e-09	8.34667
Brain-FrontalCortexBA9	5.3e-09	8.27224
Brain-Caudatebasalganglia	1.7e-08	7.77154
Brain-AnteriorcingulatecortexBA24	1.8e-08	7.75477
Brain-Cortex	1.9e-08	7.72007
Brain-Nucleusaccumbensbasalganglia	1.8e-07	6.75323
Brain-Amygdala	2.3e-07	6.63818
Brain-Substantianigra	2.5e-07	6.59717
Brain-Hippocampus	3.3e-07	6.48694
Brain-Spinalcordcervicalc-1	3.4e-06	5.46526
Brain-Hypothalamus	7.1e-06	5.15004
Brain-CerebellarHemisphere	0.0053	2.27858
Brain-Cerebellum	0.0076	2.11863
AdrenalGland	0.15	0.829149
Colon-Sigmoid	0.15	0.827784
Prostate	0.17	0.761504
Esophagus-Muscularis	0.2	0.698146
Testis	0.25	0.597525
Bladder	0.36	0.442086
Nerve-Tibial	0.38	0.419971
Esophagus-GastroesophagealJunction	0.39	0.406523
Colon-Transverse	0.48	0.322981
Muscle-Skeletal	0.48	0.319031
Cervix-Endocervix	0.67	0.176786
Artery-Coronary	0.71	0.150464
Thyroid	0.73	0.134748
Kidney-Medulla	0.78	0.107058
Artery-Tibial	0.79	0.104076
Cells-EBV-transformedlymphocytes	0.8	0.0958282
Cells-Culturedfibroblasts	0.83	0.0818921
MinorSalivaryGland	0.83	0.0807002
Esophagus-Mucosa	0.84	0.0775336
Kidney-Cortex	0.85	0.0684674
Spleen	0.86	0.0662104
SmallIntestine-TerminalIleum	0.87	0.0590728
Skin-SunExposedLowerleg	0.89	0.0489897
Vagina	0.89	0.0484195
Heart-AtrialAppendage	0.9	0.0449015
Heart-LeftVentricle	0.91	0.0418298
Cervix-Ectocervix	0.91	0.0398352
Skin-NotSunExposedSuprapubic	0.92	0.0369305
Uterus	0.93	0.032642
Artery-Aorta	0.95	0.0234396
FallopianTube	0.95	0.0214999
Ovary	0.96	0.0190589
Liver	0.98	0.010937
Adipose-Subcutaneous	0.99	0.00536551
Breast-MammaryTissue	0.99	0.00407899
Lung	1	0.00168672
Adipose-VisceralOmentum	1	0.000333212
Brain_Cerebellar_Hemisphere_eur
TissueName	RobustRegressionZ	AveragedLog(p)
Brain-CerebellarHemisphere	5.6e-16	15.2517
Brain-Cerebellum	4.2e-15	14.3774
Brain-Cortex	1.3e-07	6.88506
Brain-Nucleusaccumbensbasalganglia	4.1e-07	6.39225
Brain-FrontalCortexBA9	5.6e-07	6.25471
Brain-Putamenbasalganglia	5.6e-07	6.25017
Brain-Caudatebasalganglia	6.8e-07	6.16491
Brain-AnteriorcingulatecortexBA24	2.3e-06	5.6372
Brain-Hypothalamus	4.2e-05	4.37663
Brain-Amygdala	6.9e-05	4.16361
Brain-Hippocampus	0.00015	3.83324
Brain-Substantianigra	0.0015	2.83822
Cervix-Endocervix	0.0016	2.79264
Uterus	0.004	2.39718
Brain-Spinalcordcervicalc-1	0.008	2.09666
Ovary	0.01	1.9799
Cervix-Ectocervix	0.017	1.76345
Nerve-Tibial	0.029	1.5334
FallopianTube	0.13	0.876803
AdrenalGland	0.23	0.629016
Bladder	0.26	0.591144
Testis	0.27	0.569981
Vagina	0.31	0.507354
Esophagus-GastroesophagealJunction	0.34	0.466235
Prostate	0.36	0.445638
Colon-Sigmoid	0.39	0.406323
Esophagus-Muscularis	0.51	0.288638
Spleen	0.55	0.261512
SmallIntestine-TerminalIleum	0.56	0.252142
Cells-EBV-transformedlymphocytes	0.63	0.203778
Breast-MammaryTissue	0.64	0.193575
Heart-AtrialAppendage	0.7	0.152947
Colon-Transverse	0.75	0.12645
Artery-Coronary	0.77	0.111227
Thyroid	0.91	0.0395866
Cells-Culturedfibroblasts	0.93	0.0321994
Heart-LeftVentricle	0.94	0.0269722
Artery-Tibial	0.95	0.0236613
Skin-NotSunExposedSuprapubic	0.96	0.0185609
Artery-Aorta	0.97	0.0126123
Lung	0.98	0.0104254
Skin-SunExposedLowerleg	0.98	0.00970075
Liver	0.98	0.00917412
Adipose-Subcutaneous	0.98	0.00830548
Kidney-Medulla	0.99	0.00481733
Adipose-VisceralOmentum	0.99	0.00442498
Kidney-Cortex	0.99	0.00294354
Muscle-Skeletal	1	0.00083069
Esophagus-Mucosa	1	0.000262833
MinorSalivaryGland	1	0.000114582
Brain_Cerebellum_eur
TissueName	RobustRegressionZ	AveragedLog(p)
Brain-Putamenbasalganglia	2.6e-11	10.5823
Brain-Amygdala	7.2e-11	10.1411
Brain-Cortex	7.8e-11	10.1054
Brain-AnteriorcingulatecortexBA24	8.9e-11	10.0505
Brain-FrontalCortexBA9	1e-10	10.002
Brain-Caudatebasalganglia	1e-10	9.99272
Brain-Hippocampus	9.8e-10	9.00852
Brain-Substantianigra	9.9e-10	9.00563
Brain-Nucleusaccumbensbasalganglia	1.4e-09	8.83942
Brain-Hypothalamus	1.2e-08	7.91226
Brain-Spinalcordcervicalc-1	2e-07	6.69611
Brain-Cerebellum	3.9e-07	6.40349
Brain-CerebellarHemisphere	4.2e-07	6.37185
Colon-Sigmoid	0.021	1.67252
Testis	0.18	0.740106
Esophagus-GastroesophagealJunction	0.21	0.677373
Esophagus-Muscularis	0.24	0.620883
Colon-Transverse	0.26	0.591716
Cervix-Endocervix	0.39	0.40435
SmallIntestine-TerminalIleum	0.64	0.192746
Heart-LeftVentricle	0.64	0.191806
Prostate	0.65	0.188122
Nerve-Tibial	0.67	0.17492
Bladder	0.68	0.168741
Cervix-Ectocervix	0.69	0.159579
AdrenalGland	0.72	0.141411
Heart-AtrialAppendage	0.78	0.107545
Thyroid	0.83	0.0831376
Artery-Coronary	0.88	0.0564273
Uterus	0.89	0.0498186
Cells-Culturedfibroblasts	0.91	0.041896
Vagina	0.91	0.0406907
FallopianTube	0.93	0.0334249
Artery-Tibial	0.93	0.032415
Ovary	0.93	0.0296517
Kidney-Medulla	0.95	0.0240915
Spleen	0.95	0.0236322
Lung	0.95	0.0231972
Muscle-Skeletal	0.96	0.0195592
Artery-Aorta	0.98	0.0109155
Kidney-Cortex	0.99	0.00507354
Breast-MammaryTissue	0.99	0.00504329
Liver	0.99	0.0041912
Skin-NotSunExposedSuprapubic	0.99	0.00281965
Esophagus-Mucosa	0.99	0.00237929
Skin-SunExposedLowerleg	1	0.00105418
MinorSalivaryGland	1	0.00101138
Adipose-Subcutaneous	1	0.00083705
Adipose-VisceralOmentum	1	0.000629791
Cells-EBV-transformedlymphocytes	1	0.00042471
Brain_Cortex_eur
TissueName	RobustRegressionZ	AveragedLog(p)
Brain-Cortex	6.7e-10	9.17109
Brain-FrontalCortexBA9	1e-09	8.97995
Brain-AnteriorcingulatecortexBA24	3e-09	8.52932
Brain-Caudatebasalganglia	1.1e-08	7.95489
Brain-Putamenbasalganglia	1.5e-08	7.81881
Brain-Nucleusaccumbensbasalganglia	2e-08	7.70406
Brain-Amygdala	2e-08	7.68965
Brain-Hippocampus	1.8e-07	6.74746
Brain-Hypothalamus	2.9e-07	6.53226
Brain-Substantianigra	5e-07	6.3006
Brain-Spinalcordcervicalc-1	1.2e-05	4.90999
Brain-Cerebellum	0.00011	3.94738
Brain-CerebellarHemisphere	0.00013	3.88655
Cervix-Endocervix	0.032	1.49383
AdrenalGland	0.038	1.42504
Prostate	0.1	0.997834
Thyroid	0.18	0.735156
Testis	0.21	0.679318
Kidney-Cortex	0.22	0.660902
Kidney-Medulla	0.22	0.655253
FallopianTube	0.25	0.596079
Colon-Transverse	0.32	0.495653
Colon-Sigmoid	0.45	0.344483
Cervix-Ectocervix	0.49	0.312541
SmallIntestine-TerminalIleum	0.52	0.283671
Bladder	0.55	0.259327
Ovary	0.61	0.212662
Uterus	0.63	0.201479
Spleen	0.65	0.190395
Vagina	0.69	0.163661
Cells-Culturedfibroblasts	0.72	0.14489
Cells-EBV-transformedlymphocytes	0.72	0.142453
Liver	0.74	0.130427
Heart-LeftVentricle	0.81	0.0929765
Lung	0.81	0.0896804
Heart-AtrialAppendage	0.82	0.0865993
MinorSalivaryGland	0.84	0.075245
Nerve-Tibial	0.86	0.0666525
Esophagus-Muscularis	0.86	0.0633405
Esophagus-Mucosa	0.94	0.026484
Esophagus-GastroesophagealJunction	0.94	0.0245937
Muscle-Skeletal	0.95	0.0233363
Breast-MammaryTissue	0.95	0.0216321
Skin-NotSunExposedSuprapubic	0.99	0.00525394
Artery-Coronary	0.99	0.00301433
Skin-SunExposedLowerleg	0.99	0.00292135
Adipose-VisceralOmentum	0.99	0.00287742
Adipose-Subcutaneous	1	0.000563174
Artery-Aorta	1	0.00031462
Artery-Tibial	1	0.000155046
Brain_Frontal_Cortex_BA9_eur
TissueName	RobustRegressionZ	AveragedLog(p)
Brain-Putamenbasalganglia	3.1e-10	9.50317
Brain-Caudatebasalganglia	1.1e-09	8.96899
Brain-Substantianigra	1.4e-09	8.84135
Brain-Amygdala	3.2e-09	8.50019
Brain-Nucleusaccumbensbasalganglia	4.1e-09	8.39142
Brain-Hypothalamus	5.7e-09	8.2422
Brain-AnteriorcingulatecortexBA24	1e-08	7.98386
Brain-FrontalCortexBA9	1.1e-08	7.95984
Brain-Cortex	1.4e-07	6.83986
Brain-Hippocampus	4.6e-07	6.33867
Brain-Spinalcordcervicalc-1	4e-06	5.39943
Brain-CerebellarHemisphere	0.0019	2.73027
Brain-Cerebellum	0.0045	2.34219
Testis	0.052	1.28344
AdrenalGland	0.22	0.665314
Cells-Culturedfibroblasts	0.25	0.607798
Thyroid	0.43	0.364099
Colon-Transverse	0.44	0.354611
Heart-LeftVentricle	0.52	0.28733
Esophagus-Muscularis	0.54	0.264432
Colon-Sigmoid	0.55	0.263438
Heart-AtrialAppendage	0.55	0.261455
Kidney-Medulla	0.57	0.244633
Prostate	0.65	0.190057
Esophagus-GastroesophagealJunction	0.73	0.138492
Cells-EBV-transformedlymphocytes	0.76	0.118769
Bladder	0.78	0.108148
Cervix-Endocervix	0.79	0.103454
Uterus	0.82	0.0854113
Muscle-Skeletal	0.85	0.0687182
Nerve-Tibial	0.86	0.0632917
Liver	0.91	0.0425028
Kidney-Cortex	0.91	0.0419927
Spleen	0.92	0.0384884
Breast-MammaryTissue	0.92	0.036906
FallopianTube	0.92	0.0366755
Adipose-VisceralOmentum	0.93	0.0314087
Ovary	0.94	0.0290423
SmallIntestine-TerminalIleum	0.94	0.0276729
Artery-Coronary	0.95	0.0211343
Adipose-Subcutaneous	0.99	0.00606922
Artery-Tibial	0.99	0.00402895
Cervix-Ectocervix	0.99	0.00291972
Lung	1	0.0014701
MinorSalivaryGland	1	0.000637977
Vagina	1	0.000214508
Esophagus-Mucosa	1	8.33344e-05
Artery-Aorta	1	2.47049e-05
Skin-SunExposedLowerleg	1	2.20891e-05
Skin-NotSunExposedSuprapubic	1	1.35508e-05
Brain_Hippocampus_eur
TissueName	RobustRegressionZ	AveragedLog(p)
Brain-Putamenbasalganglia	5.4e-11	10.267
Brain-Caudatebasalganglia	1.5e-10	9.81601
Brain-Hippocampus	2.3e-10	9.64725
Brain-AnteriorcingulatecortexBA24	4.6e-10	9.33986
Brain-Amygdala	4.6e-10	9.33732
Brain-FrontalCortexBA9	5.7e-10	9.24753
Brain-Substantianigra	5.7e-10	9.24684
Brain-Spinalcordcervicalc-1	2.3e-09	8.64101
Brain-Cortex	3.8e-09	8.42059
Brain-Nucleusaccumbensbasalganglia	4.5e-09	8.34527
Brain-Hypothalamus	1.5e-08	7.80987
Brain-CerebellarHemisphere	5.6e-06	5.25232
Brain-Cerebellum	3e-05	4.51787
Testis	0.0048	2.32325
AdrenalGland	0.24	0.617846
Colon-Sigmoid	0.25	0.605328
Esophagus-GastroesophagealJunction	0.35	0.460342
Nerve-Tibial	0.38	0.418645
Esophagus-Muscularis	0.42	0.378038
Uterus	0.51	0.291985
Kidney-Medulla	0.52	0.283033
Kidney-Cortex	0.56	0.249338
Spleen	0.63	0.203629
Ovary	0.7	0.154584
Cells-Culturedfibroblasts	0.72	0.143635
Cells-EBV-transformedlymphocytes	0.79	0.103273
FallopianTube	0.82	0.0887342
Colon-Transverse	0.82	0.0849536
Heart-AtrialAppendage	0.84	0.0747678
Muscle-Skeletal	0.84	0.0746099
SmallIntestine-TerminalIleum	0.85	0.0716487
Cervix-Endocervix	0.85	0.070576
Thyroid	0.93	0.0334586
Heart-LeftVentricle	0.95	0.0236276
Prostate	0.96	0.0163153
Artery-Coronary	0.97	0.014732
Cervix-Ectocervix	0.97	0.0139646
Artery-Tibial	0.98	0.00993447
Bladder	0.98	0.00848014
Artery-Aorta	0.98	0.00772657
Adipose-Subcutaneous	0.99	0.00335989
Lung	0.99	0.00292297
Liver	0.99	0.00245251
Vagina	0.99	0.00243957
Breast-MammaryTissue	0.99	0.00220192
Skin-NotSunExposedSuprapubic	1	0.00125647
Skin-SunExposedLowerleg	1	0.000663624
Adipose-VisceralOmentum	1	0.00032354
MinorSalivaryGland	1	4.27841e-05
Esophagus-Mucosa	1	1.18905e-06
Brain_Hypothalamus_eur
TissueName	RobustRegressionZ	AveragedLog(p)
Brain-Caudatebasalganglia	6.5e-07	6.18814
Brain-Putamenbasalganglia	1.8e-06	5.74609
Brain-FrontalCortexBA9	2.5e-06	5.59828
Brain-CerebellarHemisphere	2.7e-06	5.57359
Brain-AnteriorcingulatecortexBA24	6.8e-06	5.16902
Brain-Nucleusaccumbensbasalganglia	9.3e-06	5.03299
Brain-Cortex	1e-05	4.99752
Brain-Cerebellum	1.7e-05	4.7824
Brain-Amygdala	5.9e-05	4.22584
Brain-Substantianigra	0.00011	3.95225
Brain-Hypothalamus	0.00013	3.89695
Brain-Hippocampus	0.00014	3.84666
Brain-Spinalcordcervicalc-1	0.0037	2.43156
Testis	0.0075	2.12234
Colon-Sigmoid	0.087	1.05951
Cervix-Endocervix	0.095	1.02424
Nerve-Tibial	0.12	0.908493
Colon-Transverse	0.19	0.728915
Cervix-Ectocervix	0.2	0.703354
Kidney-Cortex	0.2	0.689322
Spleen	0.22	0.654498
Kidney-Medulla	0.29	0.534534
AdrenalGland	0.31	0.51237
Ovary	0.34	0.472766
Thyroid	0.34	0.468604
SmallIntestine-TerminalIleum	0.46	0.339263
Muscle-Skeletal	0.48	0.319092
Uterus	0.56	0.248812
Bladder	0.62	0.206007
Vagina	0.66	0.179249
Artery-Coronary	0.69	0.162501
Cells-EBV-transformedlymphocytes	0.73	0.134865
FallopianTube	0.79	0.104146
Heart-LeftVentricle	0.85	0.0694413
Liver	0.86	0.0652796
Heart-AtrialAppendage	0.87	0.0601767
Esophagus-Muscularis	0.89	0.0511984
Prostate	0.89	0.048853
Lung	0.91	0.0399863
Esophagus-GastroesophagealJunction	0.91	0.0385854
Artery-Tibial	0.93	0.033705
Adipose-Subcutaneous	0.93	0.0326901
MinorSalivaryGland	0.94	0.0262199
Breast-MammaryTissue	0.94	0.0252019
Adipose-VisceralOmentum	0.96	0.0182148
Artery-Aorta	0.96	0.0173838
Cells-Culturedfibroblasts	0.99	0.00596617
Skin-NotSunExposedSuprapubic	1	0.00154128
Skin-SunExposedLowerleg	1	0.00125479
Esophagus-Mucosa	1	4.8797e-05
Brain_Nucleus_accumbens_basal_ganglia_eur
TissueName	RobustRegressionZ	AveragedLog(p)
Brain-FrontalCortexBA9	1.4e-10	9.83889
Brain-AnteriorcingulatecortexBA24	1.5e-09	8.8266
Brain-Cortex	3.2e-09	8.49957
Brain-Putamenbasalganglia	7.7e-09	8.1138
Brain-Caudatebasalganglia	1.7e-08	7.7603
Brain-Nucleusaccumbensbasalganglia	2.5e-08	7.59999
Brain-Amygdala	2.2e-07	6.65879
Brain-Hypothalamus	1.6e-06	5.80819
Brain-Hippocampus	1.6e-06	5.79354
Brain-Substantianigra	4.5e-06	5.34837
Brain-CerebellarHemisphere	2.5e-05	4.59386
Brain-Spinalcordcervicalc-1	0.00021	3.67914
Brain-Cerebellum	0.00061	3.21225
Testis	0.015	1.81714
AdrenalGland	0.062	1.20995
Muscle-Skeletal	0.062	1.20484
Colon-Sigmoid	0.14	0.863369
Colon-Transverse	0.4	0.396762
Cells-EBV-transformedlymphocytes	0.48	0.316632
Heart-LeftVentricle	0.56	0.255342
Prostate	0.59	0.2315
Bladder	0.68	0.164566
Liver	0.76	0.120656
Cervix-Endocervix	0.79	0.102228
Uterus	0.83	0.0816891
Spleen	0.85	0.0683285
SmallIntestine-TerminalIleum	0.86	0.0660202
Kidney-Medulla	0.86	0.0645534
Kidney-Cortex	0.86	0.0638617
Esophagus-Muscularis	0.87	0.0623819
Thyroid	0.89	0.0525095
Esophagus-Mucosa	0.9	0.0480869
Heart-AtrialAppendage	0.91	0.0403117
Esophagus-GastroesophagealJunction	0.92	0.0349475
Ovary	0.92	0.0348676
Cervix-Ectocervix	0.95	0.0245028
Vagina	0.96	0.0188801
MinorSalivaryGland	0.97	0.0123333
FallopianTube	0.98	0.00915573
Cells-Culturedfibroblasts	0.98	0.00802566
Nerve-Tibial	0.99	0.00513173
Artery-Tibial	0.99	0.00234747
Breast-MammaryTissue	1	0.000245922
Skin-SunExposedLowerleg	1	0.000242989
Artery-Coronary	1	0.000107854
Skin-NotSunExposedSuprapubic	1	8.63799e-05
Lung	1	5.12907e-05
Adipose-Subcutaneous	1	1.19631e-05
Adipose-VisceralOmentum	1	5.00793e-06
Artery-Aorta	1	1.34474e-06
Brain_Putamen_basal_ganglia_eur
TissueName	RobustRegressionZ	AveragedLog(p)
Colon-Transverse	1.3e-08	7.89192
SmallIntestine-TerminalIleum	2.2e-07	6.66414
Bladder	4e-05	4.3997
Esophagus-Mucosa	0.00019	3.72905
Spleen	0.0011	2.95794
Vagina	0.0012	2.93622
Colon-Sigmoid	0.0087	2.05976
Cervix-Ectocervix	0.01	1.99849
Cells-EBV-transformedlymphocytes	0.017	1.78123
AdrenalGland	0.028	1.55533
Cervix-Endocervix	0.031	1.50802
Liver	0.033	1.47715
Cells-Culturedfibroblasts	0.047	1.33187
MinorSalivaryGland	0.074	1.13168
Kidney-Cortex	0.08	1.0986
Esophagus-Muscularis	0.091	1.04282
Lung	0.094	1.0278
Uterus	0.095	1.02247
Skin-SunExposedLowerleg	0.098	1.01014
Kidney-Medulla	0.1	0.990461
Skin-NotSunExposedSuprapubic	0.11	0.952562
Adipose-VisceralOmentum	0.11	0.944528
Breast-MammaryTissue	0.13	0.897712
Esophagus-GastroesophagealJunction	0.14	0.85664
Artery-Coronary	0.14	0.844053
FallopianTube	0.18	0.752097
Heart-LeftVentricle	0.27	0.568794
Adipose-Subcutaneous	0.3	0.5223
Brain-CerebellarHemisphere	0.32	0.498419
Prostate	0.33	0.484764
Brain-Putamenbasalganglia	0.33	0.477202
Testis	0.33	0.475273
Brain-Cerebellum	0.36	0.446168
Brain-FrontalCortexBA9	0.37	0.428646
Brain-Cortex	0.39	0.404059
Heart-AtrialAppendage	0.4	0.396269
Brain-Caudatebasalganglia	0.41	0.385033
Artery-Aorta	0.47	0.327908
Brain-Nucleusaccumbensbasalganglia	0.5	0.297786
Brain-AnteriorcingulatecortexBA24	0.52	0.279919
Artery-Tibial	0.57	0.243099
Ovary	0.73	0.135299
Thyroid	0.76	0.118212
Muscle-Skeletal	0.77	0.114583
Brain-Spinalcordcervicalc-1	0.79	0.100519
Brain-Substantianigra	0.83	0.0822933
Brain-Hippocampus	0.85	0.0696756
Brain-Hypothalamus	0.86	0.065495
Nerve-Tibial	0.86	0.0647455
Brain-Amygdala	0.89	0.0514086
Brain_Spinal_cord_cervical_c_1_eur
TissueName	RobustRegressionZ	AveragedLog(p)
Brain-Putamenbasalganglia	1.2e-09	8.93202
Brain-Caudatebasalganglia	2.4e-09	8.62338
Brain-Nucleusaccumbensbasalganglia	3.3e-09	8.48499
Brain-Cortex	1.5e-08	7.82141
Brain-FrontalCortexBA9	1.9e-08	7.72382
Brain-Substantianigra	3.4e-08	7.46627
Brain-Spinalcordcervicalc-1	4.1e-08	7.39004
Brain-AnteriorcingulatecortexBA24	5.5e-08	7.25753
Brain-Hypothalamus	7.5e-08	7.12607
Brain-Hippocampus	8.7e-08	7.05835
Brain-Amygdala	1.7e-07	6.76127
Brain-CerebellarHemisphere	0.00026	3.58869
Brain-Cerebellum	0.00029	3.53721
Colon-Sigmoid	0.093	1.0311
Testis	0.12	0.922308
Esophagus-Muscularis	0.15	0.834714
Esophagus-GastroesophagealJunction	0.24	0.611079
Heart-AtrialAppendage	0.32	0.488424
Artery-Tibial	0.42	0.376296
Artery-Coronary	0.46	0.339798
Heart-LeftVentricle	0.52	0.281361
Cells-Culturedfibroblasts	0.56	0.248913
Muscle-Skeletal	0.64	0.195737
AdrenalGland	0.66	0.182922
Spleen	0.77	0.111148
Cervix-Endocervix	0.78	0.108877
Artery-Aorta	0.8	0.0982397
Cells-EBV-transformedlymphocytes	0.81	0.0917582
Bladder	0.81	0.090058
Kidney-Medulla	0.82	0.0840147
FallopianTube	0.83	0.0800912
Colon-Transverse	0.83	0.0787178
Prostate	0.84	0.0778208
Uterus	0.84	0.0756083
Nerve-Tibial	0.88	0.0562614
Ovary	0.95	0.0219495
Kidney-Cortex	0.95	0.0203901
Liver	0.99	0.00456708
Cervix-Ectocervix	0.99	0.00297402
Thyroid	0.99	0.00239523
SmallIntestine-TerminalIleum	1	0.00168018
Adipose-VisceralOmentum	1	0.000658498
Esophagus-Mucosa	1	0.000196288
Lung	1	0.000164923
Adipose-Subcutaneous	1	0.000133641
MinorSalivaryGland	1	8.31625e-05
Vagina	1	7.99544e-05
Breast-MammaryTissue	1	5.20729e-06
Skin-NotSunExposedSuprapubic	1	9.04184e-07
Skin-SunExposedLowerleg	1	8.86818e-07
Brain_Substantia_nigra_eur
TissueName	RobustRegressionZ	AveragedLog(p)
Brain-Putamenbasalganglia	2.1e-11	10.6702
Brain-Caudatebasalganglia	2.8e-11	10.551
Brain-Nucleusaccumbensbasalganglia	1.7e-10	9.76821
Brain-FrontalCortexBA9	3.1e-10	9.50234
Brain-AnteriorcingulatecortexBA24	1.3e-09	8.87819
Brain-Cortex	1.5e-09	8.83007
Brain-Amygdala	1.8e-07	6.75625
Brain-CerebellarHemisphere	2.2e-07	6.66622
Brain-Substantianigra	6.9e-07	6.16219
Brain-Hypothalamus	1.4e-06	5.86018
Brain-Hippocampus	1.7e-06	5.77569
Brain-Cerebellum	4.9e-06	5.30547
Brain-Spinalcordcervicalc-1	5.3e-05	4.27169
AdrenalGland	0.075	1.12259
Testis	0.19	0.72646
Colon-Sigmoid	0.24	0.617942
Muscle-Skeletal	0.64	0.191863
Esophagus-Muscularis	0.66	0.180897
Spleen	0.69	0.160119
Kidney-Medulla	0.72	0.142719
Liver	0.73	0.135231
Colon-Transverse	0.77	0.11216
Kidney-Cortex	0.79	0.104804
Esophagus-GastroesophagealJunction	0.82	0.0844518
Cervix-Endocervix	0.88	0.0569343
Heart-LeftVentricle	0.88	0.0558064
Nerve-Tibial	0.9	0.0465364
Heart-AtrialAppendage	0.9	0.0437217
SmallIntestine-TerminalIleum	0.93	0.0336125
Uterus	0.93	0.0308783
Prostate	0.94	0.0249603
Cells-Culturedfibroblasts	0.95	0.0215867
Cells-EBV-transformedlymphocytes	0.95	0.0214281
FallopianTube	0.97	0.0147726
Artery-Tibial	0.98	0.00831217
MinorSalivaryGland	0.98	0.00777992
Thyroid	0.98	0.00764189
Adipose-VisceralOmentum	0.98	0.00731868
Breast-MammaryTissue	0.99	0.00580539
Artery-Coronary	0.99	0.00348404
Bladder	0.99	0.00298033
Esophagus-Mucosa	0.99	0.00283298
Ovary	0.99	0.00280126
Adipose-Subcutaneous	0.99	0.00226689
Cervix-Ectocervix	0.99	0.00218329
Vagina	1	0.00161372
Skin-NotSunExposedSuprapubic	1	0.00116666
Skin-SunExposedLowerleg	1	0.00116433
Lung	1	0.000719145
Artery-Aorta	1	0.000668834
