# Supplementary material for: A conditional gene-based association framework integrating isoform-level eQTL data reveals new susceptibility genes for schizophrenia
Source: eLife. 2022 Apr 12;11:e70779. doi: 10.7554/eLife.70779 (PMC9005191; doi:10.7554/eLife.70779)
Supplement: Table 2—source data 4. [file elife-70779-table2-data4.xlsx]

## Sheet: eDESE_isoform_eQTLs
Tissue significance estimated by eDESE:isoform based on the isoform-level eQTLs of each brain region.
Brain_Amygdala_eur
TissueName	RobustRegressionZ	AveragedLog(p)
Cervix-Ectocervix	2e-11	10.6944
Cervix-Endocervix	4.3e-08	7.36246
Uterus	4.9e-07	6.31411
Ovary	1.2e-05	4.93666
FallopianTube	3.6e-05	4.44256
Vagina	8.9e-05	4.04887
Nerve-Tibial	0.00017	3.77174
Bladder	0.0052	2.28061
Artery-Coronary	0.0081	2.09104
Artery-Aorta	0.011	1.93975
Prostate	0.013	1.88654
Colon-Sigmoid	0.022	1.66463
Lung	0.022	1.65001
Thyroid	0.027	1.57047
Esophagus-GastroesophagealJunction	0.04	1.40176
Adipose-VisceralOmentum	0.042	1.37891
Breast-MammaryTissue	0.05	1.29886
Heart-AtrialAppendage	0.061	1.21544
Spleen	0.063	1.19813
Artery-Tibial	0.067	1.17135
Adipose-Subcutaneous	0.077	1.11175
Esophagus-Muscularis	0.18	0.734626
Colon-Transverse	0.19	0.724797
MinorSalivaryGland	0.21	0.687571
AdrenalGland	0.34	0.467167
SmallIntestine-TerminalIleum	0.39	0.412969
Heart-LeftVentricle	0.43	0.368949
Liver	0.62	0.21067
Kidney-Medulla	0.63	0.198667
Esophagus-Mucosa	0.64	0.193514
Kidney-Cortex	0.69	0.15944
Testis	0.72	0.144089
Brain-Cerebellum	0.76	0.117276
Skin-NotSunExposedSuprapubic	0.82	0.0836195
Brain-Spinalcordcervicalc-1	0.86	0.0649622
Cells-Culturedfibroblasts	0.87	0.0622858
Brain-CerebellarHemisphere	0.9	0.0439433
Cells-EBV-transformedlymphocytes	0.91	0.0433081
Brain-Cortex	0.93	0.0330168
Skin-SunExposedLowerleg	0.95	0.0228027
Muscle-Skeletal	0.96	0.0176317
Brain-Hippocampus	0.97	0.0121322
Brain-Amygdala	0.98	0.00908175
Brain-AnteriorcingulatecortexBA24	0.98	0.00889319
Brain-Substantianigra	0.98	0.00764891
Brain-FrontalCortexBA9	0.98	0.00730479
Brain-Nucleusaccumbensbasalganglia	0.99	0.00459045
Brain-Putamenbasalganglia	0.99	0.00445821
Brain-Caudatebasalganglia	0.99	0.00430107
Brain-Hypothalamus	0.99	0.00250864
Brain_Anterior_cingulate_cortex_BA24_eur
TissueName	RobustRegressionZ	AveragedLog(p)
Brain-CerebellarHemisphere	2.1e-12	11.6861
Brain-Cerebellum	3.2e-12	11.4941
Brain-Cortex	3.5e-10	9.45488
Brain-FrontalCortexBA9	7.3e-09	8.13521
Brain-AnteriorcingulatecortexBA24	7.6e-08	7.1189
Brain-Nucleusaccumbensbasalganglia	3e-07	6.51945
Brain-Putamenbasalganglia	1.1e-06	5.96388
Brain-Hypothalamus	2.5e-06	5.59778
Brain-Caudatebasalganglia	3.1e-06	5.50403
Brain-Amygdala	3.4e-06	5.46885
Brain-Hippocampus	5e-06	5.30454
Brain-Substantianigra	8.1e-05	4.09027
Brain-Spinalcordcervicalc-1	0.00034	3.46229
Testis	0.012	1.91712
Spleen	0.12	0.917297
Prostate	0.16	0.797379
Liver	0.17	0.760317
Cervix-Endocervix	0.21	0.668272
Kidney-Cortex	0.26	0.57967
SmallIntestine-TerminalIleum	0.38	0.425564
Kidney-Medulla	0.39	0.407823
Colon-Transverse	0.55	0.260313
Cervix-Ectocervix	0.59	0.230887
Colon-Sigmoid	0.6	0.219767
Uterus	0.6	0.219339
Thyroid	0.61	0.213802
AdrenalGland	0.62	0.204875
Heart-LeftVentricle	0.67	0.173396
FallopianTube	0.67	0.171165
Cells-EBV-transformedlymphocytes	0.68	0.167588
Nerve-Tibial	0.7	0.153764
Muscle-Skeletal	0.71	0.148563
Ovary	0.78	0.105177
Esophagus-GastroesophagealJunction	0.83	0.0834137
Lung	0.85	0.069139
Heart-AtrialAppendage	0.89	0.052062
Esophagus-Muscularis	0.9	0.0473783
Artery-Coronary	0.93	0.0335623
Esophagus-Mucosa	0.94	0.0247701
Vagina	0.97	0.0117796
Artery-Aorta	0.98	0.00743439
Artery-Tibial	0.98	0.00731428
Skin-NotSunExposedSuprapubic	0.99	0.00258974
MinorSalivaryGland	0.99	0.0025313
Adipose-VisceralOmentum	1	0.00184255
Skin-SunExposedLowerleg	1	0.00181218
Adipose-Subcutaneous	1	0.00142551
Bladder	1	0.00141014
Breast-MammaryTissue	1	0.000680085
Cells-Culturedfibroblasts	1	0.000469763
Brain_Caudate_basal_ganglia_eur
TissueName	RobustRegressionZ	AveragedLog(p)
Colon-Sigmoid	9.6e-12	11.0168
Esophagus-GastroesophagealJunction	4.6e-07	6.33516
Esophagus-Muscularis	8.2e-07	6.08877
Bladder	9.9e-07	6.00508
Brain-Putamenbasalganglia	3.5e-06	5.46172
Brain-Caudatebasalganglia	6.6e-06	5.17777
Cervix-Endocervix	7.3e-06	5.13555
Brain-Nucleusaccumbensbasalganglia	1.1e-05	4.96241
Uterus	2.4e-05	4.62735
Brain-Hippocampus	2.5e-05	4.6063
Brain-Amygdala	3e-05	4.52851
Prostate	8.9e-05	4.04929
Brain-Cortex	9.2e-05	4.03653
Brain-Cerebellum	9.6e-05	4.01979
Brain-Substantianigra	0.00014	3.85626
Brain-Hypothalamus	0.00026	3.59212
Brain-Spinalcordcervicalc-1	0.00027	3.56121
Brain-CerebellarHemisphere	0.00047	3.32882
Brain-AnteriorcingulatecortexBA24	0.00048	3.31897
Cervix-Ectocervix	0.00054	3.26568
Brain-FrontalCortexBA9	0.00085	3.06868
Colon-Transverse	0.014	1.85665
FallopianTube	0.016	1.79882
Artery-Coronary	0.018	1.75224
Artery-Aorta	0.026	1.59275
Vagina	0.029	1.54407
Artery-Tibial	0.049	1.31391
Nerve-Tibial	0.051	1.29111
Ovary	0.055	1.25778
Thyroid	0.094	1.0272
SmallIntestine-TerminalIleum	0.21	0.67289
Heart-AtrialAppendage	0.42	0.372377
Kidney-Cortex	0.49	0.308055
Kidney-Medulla	0.54	0.268675
Spleen	0.61	0.21794
Testis	0.67	0.174535
AdrenalGland	0.77	0.11167
Lung	0.8	0.0984502
Adipose-Subcutaneous	0.88	0.0574064
Heart-LeftVentricle	0.91	0.0425925
MinorSalivaryGland	0.92	0.038007
Breast-MammaryTissue	0.92	0.034216
Adipose-VisceralOmentum	0.95	0.0200244
Cells-EBV-transformedlymphocytes	0.98	0.0105027
Esophagus-Mucosa	0.99	0.00628384
Muscle-Skeletal	0.99	0.00347328
Cells-Culturedfibroblasts	0.99	0.00272158
Skin-NotSunExposedSuprapubic	1	0.00212032
Skin-SunExposedLowerleg	1	0.00195076
Liver	1	0.00086323
Brain_Cerebellar_Hemisphere_eur
TissueName	RobustRegressionZ	AveragedLog(p)
Cervix-Endocervix	1.4e-16	15.8509
Uterus	3.6e-10	9.44557
Cervix-Ectocervix	2.8e-09	8.55448
FallopianTube	1.8e-06	5.75201
Vagina	5.9e-05	4.23237
Colon-Sigmoid	7.5e-05	4.12759
Esophagus-GastroesophagealJunction	0.00014	3.85303
Nerve-Tibial	0.00024	3.62466
Artery-Coronary	0.00027	3.56929
Ovary	0.0011	2.96951
Bladder	0.0013	2.89348
Esophagus-Muscularis	0.0013	2.88874
Artery-Tibial	0.0026	2.579
Artery-Aorta	0.0068	2.16674
Prostate	0.015	1.8152
Adipose-Subcutaneous	0.099	1.00642
Heart-AtrialAppendage	0.11	0.956454
Colon-Transverse	0.17	0.781983
Breast-MammaryTissue	0.27	0.566501
Thyroid	0.3	0.519927
Spleen	0.33	0.480008
Adipose-VisceralOmentum	0.45	0.349341
Lung	0.5	0.300902
Brain-Cerebellum	0.5	0.297191
Brain-CerebellarHemisphere	0.51	0.292035
SmallIntestine-TerminalIleum	0.53	0.276589
AdrenalGland	0.6	0.221445
Testis	0.76	0.118862
Heart-LeftVentricle	0.77	0.111937
Liver	0.86	0.0661665
Kidney-Cortex	0.87	0.0616601
Brain-Cortex	0.88	0.057349
Brain-Spinalcordcervicalc-1	0.88	0.053785
Kidney-Medulla	0.9	0.0453966
Cells-EBV-transformedlymphocytes	0.91	0.042986
Brain-FrontalCortexBA9	0.93	0.0317485
Esophagus-Mucosa	0.94	0.0266959
Brain-Substantianigra	0.96	0.0198269
Cells-Culturedfibroblasts	0.97	0.0137987
Skin-NotSunExposedSuprapubic	0.97	0.013111
Brain-Caudatebasalganglia	0.97	0.0124175
Brain-AnteriorcingulatecortexBA24	0.97	0.0123966
Brain-Putamenbasalganglia	0.97	0.012132
Brain-Hippocampus	0.98	0.00886949
Brain-Amygdala	0.98	0.00868591
Brain-Hypothalamus	0.98	0.00773738
Skin-SunExposedLowerleg	0.98	0.00701951
Brain-Nucleusaccumbensbasalganglia	0.98	0.0067552
MinorSalivaryGland	0.99	0.00484535
Muscle-Skeletal	1	0.00216845
Brain_Cerebellum_eur
TissueName	RobustRegressionZ	AveragedLog(p)
Brain-AnteriorcingulatecortexBA24	1e-12	11.9937
Brain-FrontalCortexBA9	1.6e-12	11.7856
Brain-Cortex	2.7e-12	11.5674
Brain-Nucleusaccumbensbasalganglia	5.4e-12	11.265
Brain-CerebellarHemisphere	2e-11	10.7043
Brain-Caudatebasalganglia	4.5e-11	10.3429
Brain-Putamenbasalganglia	5e-11	10.3028
Brain-Hippocampus	6.7e-11	10.1742
Brain-Amygdala	6.7e-11	10.1737
Brain-Hypothalamus	2.8e-10	9.55248
Brain-Cerebellum	9.2e-10	9.03742
Brain-Substantianigra	1.3e-09	8.87627
Brain-Spinalcordcervicalc-1	1.7e-07	6.77375
AdrenalGland	0.059	1.22703
Testis	0.2	0.690149
Kidney-Medulla	0.33	0.476758
Kidney-Cortex	0.44	0.359046
Colon-Transverse	0.44	0.354633
Nerve-Tibial	0.56	0.2545
Colon-Sigmoid	0.56	0.252546
Cervix-Endocervix	0.57	0.240797
Spleen	0.6	0.219938
Heart-LeftVentricle	0.61	0.214677
Prostate	0.74	0.131644
Cells-Culturedfibroblasts	0.76	0.116369
SmallIntestine-TerminalIleum	0.77	0.112565
Cells-EBV-transformedlymphocytes	0.78	0.106853
Muscle-Skeletal	0.81	0.0941141
Bladder	0.83	0.0826614
Esophagus-Muscularis	0.83	0.0818996
Esophagus-Mucosa	0.83	0.0800289
Liver	0.84	0.0781116
Cervix-Ectocervix	0.84	0.0770276
Heart-AtrialAppendage	0.87	0.0586576
Vagina	0.92	0.0374894
Esophagus-GastroesophagealJunction	0.92	0.0353599
Thyroid	0.93	0.0308581
FallopianTube	0.95	0.0211183
Lung	0.96	0.0186933
Ovary	0.96	0.0180493
Artery-Coronary	0.98	0.00820241
Breast-MammaryTissue	0.98	0.00759459
Skin-NotSunExposedSuprapubic	0.98	0.00681109
Uterus	0.98	0.00671087
Artery-Tibial	0.99	0.00272193
Adipose-VisceralOmentum	0.99	0.00229172
Skin-SunExposedLowerleg	0.99	0.00217892
MinorSalivaryGland	1	0.00216744
Adipose-Subcutaneous	1	0.000118276
Artery-Aorta	1	6.77705e-05
Brain_Cortex_eur
TissueName	RobustRegressionZ	AveragedLog(p)
Cervix-Endocervix	2.5e-08	7.6095
FallopianTube	4.9e-08	7.31419
Uterus	5.7e-06	5.24585
Ovary	8.9e-06	5.05119
Cervix-Ectocervix	1.4e-05	4.86791
Prostate	0.0011	2.95933
Bladder	0.0016	2.79189
Nerve-Tibial	0.0068	2.16917
Thyroid	0.015	1.81259
Colon-Sigmoid	0.016	1.79671
Brain-Cerebellum	0.02	1.69741
Vagina	0.043	1.37044
Brain-CerebellarHemisphere	0.043	1.36673
AdrenalGland	0.056	1.2539
Lung	0.072	1.14085
Brain-Cortex	0.074	1.13019
Spleen	0.15	0.824803
Breast-MammaryTissue	0.19	0.730422
Esophagus-GastroesophagealJunction	0.22	0.664294
Brain-Caudatebasalganglia	0.27	0.569711
Brain-Nucleusaccumbensbasalganglia	0.33	0.486629
Brain-Spinalcordcervicalc-1	0.39	0.413552
Brain-Hippocampus	0.39	0.408518
Artery-Coronary	0.39	0.405073
Brain-FrontalCortexBA9	0.41	0.384223
Colon-Transverse	0.45	0.344864
Brain-Putamenbasalganglia	0.45	0.34417
Brain-Hypothalamus	0.45	0.343311
Kidney-Medulla	0.46	0.333976
Kidney-Cortex	0.48	0.316396
Brain-Amygdala	0.48	0.31519
Artery-Tibial	0.51	0.289704
SmallIntestine-TerminalIleum	0.52	0.288061
Brain-AnteriorcingulatecortexBA24	0.52	0.284383
Esophagus-Muscularis	0.52	0.284097
Artery-Aorta	0.52	0.281502
Testis	0.53	0.275801
Adipose-VisceralOmentum	0.64	0.196425
Heart-AtrialAppendage	0.64	0.194755
Adipose-Subcutaneous	0.67	0.175153
Brain-Substantianigra	0.69	0.163689
MinorSalivaryGland	0.77	0.112122
Heart-LeftVentricle	0.85	0.0704773
Skin-NotSunExposedSuprapubic	0.9	0.0435821
Liver	0.91	0.0393936
Cells-EBV-transformedlymphocytes	0.94	0.027116
Skin-SunExposedLowerleg	0.95	0.0228064
Cells-Culturedfibroblasts	0.99	0.0058285
Muscle-Skeletal	0.99	0.0021784
Esophagus-Mucosa	1	0.000872324
Brain_Frontal_Cortex_BA9_eur
TissueName	RobustRegressionZ	AveragedLog(p)
Brain-Putamenbasalganglia	6.4e-15	14.1927
Brain-Caudatebasalganglia	2.1e-14	13.6815
Brain-AnteriorcingulatecortexBA24	8.1e-14	13.0925
Brain-Amygdala	1e-13	12.9995
Brain-Nucleusaccumbensbasalganglia	1.4e-13	12.8641
Brain-Hippocampus	2.3e-13	12.6321
Brain-Substantianigra	5.9e-13	12.2269
Brain-Cortex	6.8e-13	12.1663
Brain-FrontalCortexBA9	9.2e-13	12.036
Brain-Hypothalamus	3.4e-12	11.4644
Brain-Spinalcordcervicalc-1	7.1e-10	9.14886
Brain-CerebellarHemisphere	1.8e-05	4.75341
Brain-Cerebellum	1.9e-05	4.72958
Testis	0.0095	2.02451
Kidney-Medulla	0.14	0.86686
AdrenalGland	0.21	0.682275
Spleen	0.23	0.635749
Cells-EBV-transformedlymphocytes	0.28	0.553561
Liver	0.34	0.472672
Heart-LeftVentricle	0.49	0.311015
Kidney-Cortex	0.52	0.286287
Heart-AtrialAppendage	0.74	0.128233
Prostate	0.8	0.0949609
SmallIntestine-TerminalIleum	0.85	0.0730829
Colon-Transverse	0.92	0.0382784
Nerve-Tibial	0.93	0.0316573
Cells-Culturedfibroblasts	0.94	0.0282991
Muscle-Skeletal	0.94	0.0261717
Cervix-Endocervix	0.94	0.0256678
Colon-Sigmoid	0.95	0.0221346
Ovary	0.98	0.0103576
Thyroid	0.98	0.0102437
Esophagus-Muscularis	0.98	0.00716954
Cervix-Ectocervix	0.99	0.00256133
Esophagus-GastroesophagealJunction	1	0.00204887
Esophagus-Mucosa	1	0.00104167
Lung	1	0.00079673
Uterus	1	0.000534857
Adipose-VisceralOmentum	1	0.000140196
FallopianTube	1	0.00013289
MinorSalivaryGland	1	0.000120643
Breast-MammaryTissue	1	5.61418e-05
Skin-SunExposedLowerleg	1	5.09653e-05
Artery-Coronary	1	1.98484e-05
Adipose-Subcutaneous	1	1.48894e-05
Skin-NotSunExposedSuprapubic	1	1.31191e-05
Vagina	1	7.14049e-06
Artery-Tibial	1	9.35425e-07
Bladder	1	8.09555e-07
Artery-Aorta	1	3.37788e-07
Brain_Hippocampus_eur
TissueName	RobustRegressionZ	AveragedLog(p)
Brain-Amygdala	2.2e-10	9.66104
Brain-Putamenbasalganglia	3.1e-10	9.51149
Brain-Substantianigra	5.8e-10	9.2397
Brain-Hippocampus	1.3e-09	8.87379
Brain-Caudatebasalganglia	3e-09	8.52428
Brain-Hypothalamus	7.8e-09	8.11037
Brain-AnteriorcingulatecortexBA24	2.1e-08	7.67512
Brain-Nucleusaccumbensbasalganglia	2.6e-08	7.58716
Brain-Spinalcordcervicalc-1	2.6e-08	7.58556
Brain-Cortex	5.4e-08	7.26908
Brain-FrontalCortexBA9	5.6e-08	7.25328
Brain-CerebellarHemisphere	2.5e-06	5.6084
Brain-Cerebellum	7.8e-06	5.10861
Testis	0.0024	2.61704
Cells-EBV-transformedlymphocytes	0.19	0.731281
Spleen	0.22	0.649449
Liver	0.54	0.270492
Nerve-Tibial	0.58	0.236912
Colon-Sigmoid	0.65	0.184408
AdrenalGland	0.67	0.176463
Heart-AtrialAppendage	0.74	0.131498
Muscle-Skeletal	0.76	0.117096
Heart-LeftVentricle	0.78	0.105566
Prostate	0.83	0.0827021
Kidney-Cortex	0.87	0.0607125
Esophagus-Muscularis	0.89	0.0496237
Kidney-Medulla	0.9	0.0467812
Thyroid	0.91	0.0429339
Artery-Coronary	0.93	0.0324062
Esophagus-GastroesophagealJunction	0.94	0.0271911
Cells-Culturedfibroblasts	0.95	0.0202961
Bladder	0.96	0.0168152
Colon-Transverse	0.96	0.0163875
SmallIntestine-TerminalIleum	0.97	0.0150768
Lung	0.97	0.0113952
Ovary	0.99	0.00237732
Artery-Aorta	0.99	0.00236515
Adipose-VisceralOmentum	0.99	0.00225025
Artery-Tibial	1	0.0013766
Esophagus-Mucosa	1	0.000986178
FallopianTube	1	0.000887934
Adipose-Subcutaneous	1	0.000837792
Cervix-Ectocervix	1	0.000575444
Cervix-Endocervix	1	0.000558349
Skin-NotSunExposedSuprapubic	1	0.000461735
MinorSalivaryGland	1	0.000190419
Breast-MammaryTissue	1	0.000181371
Vagina	1	0.000139562
Uterus	1	9.26896e-05
Skin-SunExposedLowerleg	1	4.25298e-05
Brain_Hypothalamus_eur
TissueName	RobustRegressionZ	AveragedLog(p)
Colon-Sigmoid	6.9e-14	13.1621
Artery-Tibial	6.2e-11	10.2079
Esophagus-Muscularis	1.1e-09	8.9543
Esophagus-GastroesophagealJunction	3.8e-09	8.41956
Artery-Aorta	8.1e-09	8.09043
Bladder	2.2e-08	7.65199
Artery-Coronary	4.8e-08	7.31557
Uterus	1.4e-06	5.84522
Cervix-Endocervix	5.1e-06	5.29443
Colon-Transverse	1.3e-05	4.89789
Cervix-Ectocervix	0.00021	3.68708
Heart-AtrialAppendage	0.00062	3.21007
FallopianTube	0.00067	3.17649
Vagina	0.0055	2.25847
Ovary	0.0078	2.10915
Muscle-Skeletal	0.0084	2.07466
Adipose-Subcutaneous	0.027	1.57407
Adipose-VisceralOmentum	0.028	1.55284
Prostate	0.03	1.52576
Heart-LeftVentricle	0.038	1.42062
Thyroid	0.067	1.17525
Nerve-Tibial	0.076	1.11905
Breast-MammaryTissue	0.093	1.03247
Lung	0.11	0.943446
SmallIntestine-TerminalIleum	0.18	0.747627
AdrenalGland	0.2	0.696027
Cells-Culturedfibroblasts	0.53	0.272418
Spleen	0.62	0.208168
MinorSalivaryGland	0.63	0.198257
Cells-EBV-transformedlymphocytes	0.67	0.175268
Skin-SunExposedLowerleg	0.73	0.136606
Brain-CerebellarHemisphere	0.73	0.135525
Brain-Cerebellum	0.8	0.0971338
Kidney-Cortex	0.8	0.0951163
Skin-NotSunExposedSuprapubic	0.87	0.0596972
Esophagus-Mucosa	0.89	0.0497005
Kidney-Medulla	0.93	0.032328
Liver	0.97	0.0148672
Brain-FrontalCortexBA9	0.99	0.00388551
Brain-Cortex	0.99	0.00355484
Brain-Putamenbasalganglia	1	0.00107281
Brain-AnteriorcingulatecortexBA24	1	0.00106681
Testis	1	0.000988096
Brain-Amygdala	1	0.000618726
Brain-Substantianigra	1	0.000510469
Brain-Nucleusaccumbensbasalganglia	1	0.000417828
Brain-Caudatebasalganglia	1	0.000298507
Brain-Spinalcordcervicalc-1	1	0.00023756
Brain-Hippocampus	1	0.00012043
Brain-Hypothalamus	1	2.39349e-05
Brain_Nucleus_accumbens_basal_ganglia_eur
TissueName	RobustRegressionZ	AveragedLog(p)
Cervix-Endocervix	1.1e-10	9.97831
Uterus	1.5e-08	7.81493
Ovary	3.5e-08	7.45747
Cervix-Ectocervix	7.2e-08	7.14085
FallopianTube	2.2e-05	4.64788
Vagina	0.00077	3.11132
Prostate	0.0073	2.13561
Bladder	0.029	1.53696
Colon-Sigmoid	0.05	1.3035
Thyroid	0.063	1.19928
Artery-Aorta	0.068	1.16773
Nerve-Tibial	0.075	1.12749
Artery-Coronary	0.097	1.011
Esophagus-GastroesophagealJunction	0.1	0.989923
Artery-Tibial	0.11	0.957657
Breast-MammaryTissue	0.12	0.907601
Colon-Transverse	0.14	0.841068
SmallIntestine-TerminalIleum	0.16	0.792274
Esophagus-Muscularis	0.26	0.577631
Cells-EBV-transformedlymphocytes	0.3	0.525316
Spleen	0.34	0.472353
Adipose-Subcutaneous	0.39	0.406256
AdrenalGland	0.45	0.350219
Testis	0.47	0.328525
Adipose-VisceralOmentum	0.48	0.317772
Brain-Cerebellum	0.53	0.279565
Heart-AtrialAppendage	0.54	0.271645
Lung	0.54	0.270506
Kidney-Cortex	0.54	0.266633
Brain-Cortex	0.6	0.223337
Brain-CerebellarHemisphere	0.6	0.218427
Cells-Culturedfibroblasts	0.7	0.152188
Brain-Nucleusaccumbensbasalganglia	0.75	0.127809
Brain-AnteriorcingulatecortexBA24	0.76	0.122049
Brain-FrontalCortexBA9	0.76	0.116689
Kidney-Medulla	0.79	0.103543
MinorSalivaryGland	0.81	0.0902437
Brain-Hippocampus	0.82	0.088596
Brain-Amygdala	0.82	0.0854356
Brain-Hypothalamus	0.84	0.0737013
Heart-LeftVentricle	0.85	0.0717387
Brain-Caudatebasalganglia	0.85	0.0711514
Brain-Putamenbasalganglia	0.89	0.0524461
Liver	0.89	0.0488042
Esophagus-Mucosa	0.92	0.0346845
Brain-Substantianigra	0.93	0.0309255
Brain-Spinalcordcervicalc-1	0.94	0.0257796
Skin-NotSunExposedSuprapubic	0.95	0.0214403
Skin-SunExposedLowerleg	0.97	0.0113112
Muscle-Skeletal	1	0.00195065
Brain_Putamen_basal_ganglia_eur
TissueName	RobustRegressionZ	AveragedLog(p)
Uterus	1.3e-09	8.87902
Cervix-Endocervix	1.9e-09	8.7202
Cervix-Ectocervix	4.6e-09	8.34198
FallopianTube	5.5e-07	6.26351
Ovary	0.00011	3.97534
Vagina	0.00022	3.66425
Artery-Coronary	0.00078	3.10614
Artery-Aorta	0.0017	2.77258
Artery-Tibial	0.0056	2.25302
Breast-MammaryTissue	0.01	1.99867
Nerve-Tibial	0.01	1.98486
Colon-Sigmoid	0.013	1.90092
Thyroid	0.025	1.60522
Lung	0.027	1.57662
Esophagus-GastroesophagealJunction	0.037	1.43007
Prostate	0.055	1.25642
Adipose-Subcutaneous	0.056	1.2483
Bladder	0.11	0.939389
Esophagus-Muscularis	0.16	0.791585
Skin-SunExposedLowerleg	0.18	0.739082
Cells-Culturedfibroblasts	0.2	0.70935
Spleen	0.26	0.588459
Adipose-VisceralOmentum	0.28	0.5586
Brain-Cerebellum	0.32	0.500532
Skin-NotSunExposedSuprapubic	0.33	0.478512
Brain-CerebellarHemisphere	0.38	0.416644
MinorSalivaryGland	0.4	0.397708
AdrenalGland	0.46	0.337807
SmallIntestine-TerminalIleum	0.46	0.333575
Colon-Transverse	0.53	0.273553
Testis	0.84	0.0771594
Esophagus-Mucosa	0.84	0.0738746
Heart-AtrialAppendage	0.88	0.054779
Cells-EBV-transformedlymphocytes	0.92	0.0383265
Liver	0.92	0.038191
Kidney-Medulla	0.93	0.0315044
Kidney-Cortex	0.94	0.0284599
Muscle-Skeletal	0.94	0.0274756
Brain-Cortex	0.97	0.0146189
Brain-Hypothalamus	0.98	0.00959234
Brain-Nucleusaccumbensbasalganglia	0.98	0.00895332
Brain-Caudatebasalganglia	0.99	0.00596192
Brain-FrontalCortexBA9	0.99	0.00325543
Brain-Spinalcordcervicalc-1	0.99	0.00270396
Brain-Putamenbasalganglia	1	0.00169537
Brain-AnteriorcingulatecortexBA24	1	0.00131732
Heart-LeftVentricle	1	0.00113231
Brain-Amygdala	1	0.000814128
Brain-Hippocampus	1	0.000792268
Brain-Substantianigra	1	0.000264751
Brain_Spinal_cord_cervical_c_1_eur
TissueName	RobustRegressionZ	AveragedLog(p)
Brain-Cortex	4.1e-13	12.3922
Brain-Hippocampus	4.8e-12	11.321
Brain-AnteriorcingulatecortexBA24	1.1e-11	10.9776
Brain-FrontalCortexBA9	1.5e-11	10.8127
Brain-Nucleusaccumbensbasalganglia	7.4e-11	10.1322
Brain-Putamenbasalganglia	4e-10	9.39948
Brain-Amygdala	4.4e-10	9.35662
Brain-Caudatebasalganglia	1.9e-09	8.71353
Brain-Hypothalamus	2.4e-09	8.62045
Brain-Substantianigra	2.1e-08	7.67374
Brain-CerebellarHemisphere	2.3e-08	7.63317
Brain-Cerebellum	3.8e-08	7.42592
Brain-Spinalcordcervicalc-1	9.8e-08	7.01063
Nerve-Tibial	0.19	0.719282
Testis	0.2	0.704066
Ovary	0.45	0.344027
Uterus	0.52	0.284334
Cervix-Endocervix	0.62	0.206743
Kidney-Medulla	0.74	0.13153
Thyroid	0.77	0.111202
Colon-Sigmoid	0.78	0.10758
FallopianTube	0.81	0.0923664
Heart-AtrialAppendage	0.81	0.0896736
AdrenalGland	0.82	0.0882149
Heart-LeftVentricle	0.88	0.0535883
Prostate	0.88	0.0535606
Spleen	0.94	0.027965
Cells-EBV-transformedlymphocytes	0.94	0.0258627
Kidney-Cortex	0.95	0.0233729
Cervix-Ectocervix	0.96	0.0197375
Liver	0.96	0.0174434
Esophagus-GastroesophagealJunction	0.97	0.0151654
Cells-Culturedfibroblasts	0.97	0.0120429
Bladder	0.97	0.0115701
Artery-Coronary	0.99	0.00563424
Muscle-Skeletal	0.99	0.00556406
Artery-Tibial	0.99	0.00406263
Colon-Transverse	0.99	0.00370794
Esophagus-Muscularis	0.99	0.00324879
Artery-Aorta	0.99	0.00301621
Breast-MammaryTissue	0.99	0.00243304
Adipose-VisceralOmentum	1	0.00194999
Lung	1	0.000670006
SmallIntestine-TerminalIleum	1	0.000633703
Adipose-Subcutaneous	1	0.000286514
Skin-NotSunExposedSuprapubic	1	0.000163055
Skin-SunExposedLowerleg	1	0.000136208
Vagina	1	0.000123191
MinorSalivaryGland	1	3.67925e-05
Esophagus-Mucosa	1	1.14175e-05
Brain_Substantia_nigra_eur
TissueName	RobustRegressionZ	AveragedLog(p)
Kidney-Cortex	2e-12	11.6992
AdrenalGland	3.3e-09	8.48447
Liver	1.4e-06	5.86894
Kidney-Medulla	2.1e-06	5.68567
Spleen	2.6e-06	5.57948
Thyroid	0.0015	2.8357
Colon-Transverse	0.0039	2.41384
SmallIntestine-TerminalIleum	0.0059	2.22947
Prostate	0.011	1.95742
FallopianTube	0.027	1.56089
Cells-EBV-transformedlymphocytes	0.059	1.22957
Heart-LeftVentricle	0.062	1.20911
Cervix-Endocervix	0.077	1.11423
Lung	0.1	0.981065
MinorSalivaryGland	0.11	0.963659
Ovary	0.16	0.797665
Esophagus-Mucosa	0.2	0.708742
Heart-AtrialAppendage	0.26	0.590169
Breast-MammaryTissue	0.3	0.52312
Adipose-VisceralOmentum	0.32	0.497614
Testis	0.36	0.447241
Brain-Cortex	0.46	0.334341
Bladder	0.48	0.318613
Uterus	0.51	0.296456
Brain-Caudatebasalganglia	0.51	0.290053
Brain-Nucleusaccumbensbasalganglia	0.53	0.277926
Brain-AnteriorcingulatecortexBA24	0.57	0.243328
Brain-Putamenbasalganglia	0.59	0.225628
Brain-Hypothalamus	0.67	0.172734
Brain-FrontalCortexBA9	0.67	0.171685
Brain-Substantianigra	0.69	0.162625
Vagina	0.69	0.15965
Cervix-Ectocervix	0.69	0.159
Brain-Hippocampus	0.71	0.151205
Brain-CerebellarHemisphere	0.78	0.10904
Brain-Amygdala	0.78	0.108588
Brain-Cerebellum	0.8	0.0984503
Colon-Sigmoid	0.89	0.0485829
Cells-Culturedfibroblasts	0.91	0.043046
Brain-Spinalcordcervicalc-1	0.91	0.0426532
Skin-NotSunExposedSuprapubic	0.94	0.0267845
Artery-Coronary	0.96	0.0187694
Artery-Aorta	0.97	0.0130187
Adipose-Subcutaneous	0.98	0.00777912
Esophagus-Muscularis	0.98	0.00701394
Skin-SunExposedLowerleg	0.99	0.00296947
Nerve-Tibial	0.99	0.00283054
Esophagus-GastroesophagealJunction	0.99	0.00247553
Muscle-Skeletal	1	0.00139995
Artery-Tibial	1	0.000897684
