# Supplementary material for: A conditional gene-based association framework integrating isoform-level eQTL data reveals new susceptibility genes for schizophrenia
Source: eLife. 2022 Apr 12;11:e70779. doi: 10.7554/eLife.70779 (PMC9005191; doi:10.7554/eLife.70779)
Supplement: Table 3—source data 1. [file elife-70779-table3-data1.xlsx]

## Sheet: Sheet1
The PubMed search hits of the unique potential susceptibility genes of schizophrenia identified by eDESE:isoform (compared with S-PrediXcan and eDESE:gene).
Gene Symbol	synonym	PubMed IDs
RGS4	SCZD9	33884581;32779957;32346293;32269465;31829066;30279737;30214040;29680514;28544755;26973546;26910404;26803614;26424323;26405684;26076775;25209194;25025909;24229325;23684163;23332465;23093381;23085507;23052218;22970249;22499782;22193724;22184188;22157635;21910931;21712773;21541283;20889653;20477943;19937977;19553869;19282471;19153107;19041089;18834502;18804346;18685145;18622782;18584117;18493969;184…
RPA1
RPL3
RTN3
SALL3
SBF1
ATXN2	SCA2, TNRC13	27046643;24333172;21629438;18342564
SCAND2P	SCAND2
BLM		31112269
SCTR		18698228
SGCD
SLBP
SLCO3A1	SLC21A11	18521091
BRAF
SLC22A7
SLC27A4
SLC5A6
SMARCA4	SNF2L4	22675514
SNRNP70	RNPU1Z, RPU1, SNRP70
SPTBN1
SRP14
BTN1A1	BTN	31068771
BTN2A1
STAT2		34364876;28226265
BTN2A2
BTRC
SULT1A3	STM	19349376;17368430
TACC1		32129128
TSPO	BZRP	33825022;33735406;33098761;32975758;32839410;32662626;32606376;32425835;31699629;31420201;31083013;30503836;30409695;30355368;30255837;30189290;30126329;29906515;29748630;29653835;29326362;29201010;28893493;28580888;28194003;28093569;27698434;27609240;27602389;27070405;26551697;25560467;28781965;25385788;24215796;23638491;22968319;22348611;11215759
TCF4		34308291;34184026;33973063;33963287;33519394;33414364;33324248;33228529;33037178;32765228;32641419;32640307;32474139;32280673;32266943;32071599;31945448;31581354;31535015;31336035;31191620;31142819;31081034;31078131;30771755;30705426;30626913;30288643;29905862;29599094;29588831;29540662;29373732;29372809;29287625;29228394;29222403;29187021;29105523;28951451;28879201;28321286;28289282;30775158;280…
TEAD4	TCF13L1
TESK1
TGM2		26307914;20926141;18561261
GIGYF2	PERQ2, PERQ3, TNRC15, PARK11	30929901
TPBG
TPD52L2
TPM3	NEM1
ACP2		26482417
TRPC4
TXNL1	TXNL
UBE2D3		27164557
UCP2	BMIQ4	33191890;22001364;21332312;17066476
UNC13B	UNC13	26990377
USP8		29735556
VRK2		33522046;33263727;32583282;32425817;31935637;31050055;30846698;30643786;30062698;29373732;29372809;29100046;28798405;27922604;27382989;27318676;26941264;26345874;25966588;25079070;23102693;22883433;21791550
WASF1
ZBTB14	ZFP161
ZNF23	ZNF359
RHBDD3	C22orf3
IKZF2	ZNFN1A2
BCL11A	EVI9	32232389;32006661;28694195;25938782
RBMS3		33130294
FBXO11
FBXL17	FBXO13	33130294
CA11
RGS19
BCL2L12
SLC12A5		33481009;31240228;30820025;30668668;30576625;26528127;22496567;21795557
NETO1		22205981
CABP1		30285260
RIPOR2	C6orf32, FAM65B
CACNA1A	CACNL1A4, SCA6, MHP1, MHP	34015490;31808001;15024829;10442462;10412193
CDK2AP1		32425817;25626716
RTN4		33721786;30040841;22320844;21563301;18948092;16632332;15234466;12425946
UBAP2		27400856
SMPD3		34182925
IFT81	CDV1
BBX
PCDHB17P	PCDHB17
IMMP2L	IMMP2L-IT1	26198764;19546859
ZEB2	ZFHX1B	26972474;26654950;24058414
PPP1R16A
SNX7		27245499;26666201
SNX8
SNX17
TLN2
CACNA2D3		30308413;28431800;27028512
DYNLRB1	DNCL2A
JAM3
LRRC4		29949768;19467332
PABPC1L	C20orf119
ARFGAP1	ARF1GAP
DHX35	C20orf15, DDX35
CCNE1	CCNE	31081173
TMEM74B	C20orf46
SIRPB1		25039969;24564241
SCRT2
SLC2A13		31768373
NAV1		33436636;31920555;31249508;30962870;28987817;28469558;27666479;21145444
STRC	DFNB16	26136833
VSTM2L	C20orf102
DNTTIP1	C20orf167
SLC19A3
TRIM33
GALNT17	WBSCR17
CARD9
ADAP1	CENTA1
CD34		29212157;32864408;19837166;10392297
TMEM189
CIZ1
COQ8A	CABC1, ADCK3
CD47	MER6	33833053;25661533
TSC22D1	TGFB1I4
THEMIS2	C1orf38
IPO13
HAX1
STAMBP
POSTN
MORF4L1
MOB4	PREI3, MOBKL3
CDK11A	CDC2L3, CDC2L2
NEGR1		34203377;32982666;32266715;30932003;29434535;23962679
TAF5L
PRPF8	RP13
TRNT1
ANAPC7
CHST12
DPF3
SLC12A9
TBRG4
PJA2	RNF131
GMNN
HOMER3
PTBP2
SEC11A	SEC11L1
LIN7B		25937794
CYHR1
CDKN2B
CDKN2C
NISCH		30339835
IL17RB	IL17BR
TUBGCP6
TAB1	MAP3K7IP1
RBFOX1		33973063;31294817;30597088;30001398;28431800;27164557;26500751;22952857
BANK1		33130294
RAB21
YPEL4
NEIL1		29960812
ZDHHC8		33098288;28139055;27909454;27365300;26221035;25913858;25667193;23403413;22155432;20661937;20468065;19445674;18836441;18075473;17982252;16860541;16721403;16225675;16150541;15992527;15631889;15582150;15489219;15184899
SUN1	UNC84A
CETN3
SLC44A1	CDW92
CATSPER2
AP1S3		26019538
VRK3
TRIM46
FER1L5
RCC1	CHC1
ZDHHC12		22155432
TBC1D5
CMTM6	CKLFSF6
SLC25A5P1	ANTP3
MMAB
PPM1F
TNNI3K
MECR		26531332
ABHD12B	C14orf29
ATG14	KIAA0831
TNPO2
PAN2	USP52
DDX55
ADAM22		29520216
TMEM179	C14orf90
CYB5R4	NCB5OR
JKAMP	C14orf100
EVL		23218666
TRPT1
S100A16
SETD3	C14orf154
BDNF-AS	BDNFOS	33403596;30312750;29274733;28011898;26909392;25385582;23431036;23295397;19406621;18205169;12709305;12426055;10581496
CHD7	CRG	33169155;27762073
IPO11
SLC37A3
TPH2		33986383;33666843;32148370;31216212;31082390;30513372;29775696;28443016;28264500;28084537;27761358;26291320;26172220;25073638;24668623;24196946;22888631;22655589;22392150;22342331;21541283;21399903;21396719;20938755;20874521;20623453;20144688;20126463;19358880;18444257;18212115;17239033;16436194;16240163;15840421
ZDHHC18		29024729
SCFD1	C14orf163
ZFYVE21
PLEKHF1
THAP2
SLC39A8		33608496;32753748;32425817;32377000;31533672;31521203;30696806;30649180;28557351;27492617;27182965;30090406;26006263;22078303
GTDC1
CLU	CLI, APOJ	30705251;30599442;27242348;20738160
LINGO2	LRRN6C	28973307
UBR2	C6orf133
CGAS	C6orf150, MB21D1	28443016
RWDD3
ATG16L1	APG16L, ATG16L
DIABLO
PPIL6
KIAA0319		24447899;22669497;21507613
SBDSP1	SBDSP
FSIP2
CHCHD3
NUDCD3
KDM7A	JHDM1D
ADAMTS7
C7orf50
GSTO2
HSD17B14	DHRS10
ZNF473
HSD17B6
CPNE8		34182925
WBP1L	C10orf26	31840934;25778617;23637704;22883350;22182936
BORCS7	C10orf32	32779937;31386983;28986965;27158905;27004590
VPS13C
RUSC2
CERCAM	CEECAM1
TRMT61A	C14orf172
ACTR6
APC2
CEND1
PHF21A		26077434
CISD2	ZCD2, WFS2
ATP13A1	ATP13A
LY6K
PHRF1	RNF221
BOLA3
INTS1
DESI1	FAM152B, PPPDE2
REXO1	TCEB3BP1
SIL1	MSS	32691055;30366639
FLAD1
CSRP1	CYRP
C3orf62
GLT8D2
TRMT2A
ZBTB44	BTBD15
PRPF40B
SAAL1
DRC7	C16orf50, CCDC135
DRC3	LRRC48
CUL3		32842956;31780330;27716508;25695269
PRMT7		31579629
SLC38A7		28659829
FAM214A	KIAA1370
PGAP1		30664618
C12orf43
NAA40	NAT11
NSUN2	MRT5
SYBU
LINC01521
PIH1D1	NOP17
MFSD13A	C10orf77, TMEM180	33768244
FUZ
CYP2D7	CYP2D, CYP2D@, CYP2D7P1, CYP2D7P	30138581;1352597
MSANTD2	C11orf61
CDHR3
FAAP20	C1orf86
TSNARE1		32066673;31548722;31336035;29373732;27668389;25471352;24166486
KCTD18
TEKT5
WDR81
METTL15	METT5D1
WDSUB1	WDSAM1
C8orf31
C12orf65		32425817;27858754
ZFP41
FMC1	C7orf55
DCTN2		31602316
LINC02609
DDB2
NIPAL1	NPAL1
CRTC2
SPATA24
PAXIP1-AS1
TMEM218
ADRA1A	ADRA1C	34184773;25194461;24249923;22037178;21894153;21823169;21302347;19918262;19204725;17408692;16043131;11603885
LINC00877
SEPSECS-AS1
ZNF707
FAM221A	C7orf46
ZMAT5	ZC3H19
COX19
CCDC189	C16orf93
RHNO1	C12orf32
FAM222A-AS1
SNAI3-AS1
NABP2	OBFC2B
TSEN2
CCDC107
SLC35G2	TMEM22
LYSMD2
ANKRD39
DIS3L2	FAM6A
DHODH
CCDC24
SLC44A3
TMEM175
SLX1B	GIYD2
DRAM2	TMEM77
CAMKV
ZNF682
DLG1		32641419;30976085;28990294;28588433;28195572;27271353;26474449;26440542;25902861;24255876;23936182;23576434;21850710;20691406
PPIP5K2	HISPPD1, DFNB100
DENND4B	KIAA0476
ADSL		16741940
EHBP1
DLX2		29156684;22910687;20436929;19018235
MINAR1	KIAA1024
CAMSAP2	CAMSAP1L1
ZNFX1
CIP2A	KIAA1524
KIAA1755
DMXL2
KIAA1841
GLDN	COLM
KIFC2
LARP1
THEM6	C8orf55
MESP2
HECW2
CASTOR3	GATS
SLC51A
PPRC1
POLR3G
POP4
CRBN	MRT2A
DIMT1	DIMT1L
RFT1
PYCR2
WDR61
SEC16B	LZTR2
VMO1
C1orf100
RRP7BP	RRP7B
METTL21A	FAM119A
HDDC3
MARVELD3	MRVLDC3
STIMATE	TMEM110
PPTC7
DNAJB13
KNSTRN	C15orf23
NT5DC3		21392734
ITFG2	FGGAP1
ATP5MD	USMG5	34021155
ECM2		27606318
LRRC55
EGR2	KROX20	28981898;26119399;25298178;24704148;22691714;22089088;20687139;20144677;17360599
LRTM2
INKA1	C3orf54, FAM212A
DENND6B	FAM116B
EIF3E	INT6, EIF3S6
EIF3B	EIF3S9
ELAVL3		26325429
PLIN5
EML1	EMAPL
ENDOG
BCL2L15	C1orf178
NHLRC3
EPB41L3
ASPDH
EPHA7
FAM166B
HEPN1
C12orf73
EFCAB10
DNM1P41	DNM1DN11@
RPS2P46
RPL5P34
FEZ1		33446247;32640307;29249816;28928414;28645778;27346367;27239468;26929903;25595671;25054019;24940743;24726361;22099459;21853134;21664390;22832604;20084519;19632097;18647754;18552348;18470533;17664024;17374448;17346882;17117617;16936715;16510495;15797709;15522253;14992819;12874605
FGA		31198450;29439776;29188627;28203040;24648824;22975849;22453865;19196496;19164494;17690978;17434684;15656986;19112358
FGD2
AKAP13	LBC
FKBP8
PRSS51
NPIPB11
NPIPB12
AKAP6
FOXM1	FKHL16
FOXO3	FKHRL1, FOXO3A	33485989;29136250;28220356;27922594;27283899;27173157;24203572;20530112
ABHD14A-ACY1
FSCN3
SEC14L6
CACNA1C-AS2
FXR1		33866994;33863995;32893934;30687136;30087606;29706865;28240266;26963595;26612855
ALDH5A1		15642443
GABRD		25937794
MAGI2-AS3
STIM2-AS1
ALDH3B1	ALDH7	19159868;17382292;16092759
GALNS
GBF1
GDAP1L1
GDF1
GIT1		27457813
GIT2		28117656
MIR4500HG
BOLA3-AS1
MAFG-DT	MAFG-AS1
TMEM161B-AS1
GNB1
GNG2
PARD6G-AS1
GAS5-AS1
FAHD2CP
FAM227A
GOLGA4
GPD1
ADGRG1	GPR56	32452062
RPARP-AS1
GRIA1	GLUR1	33946654;31228641;31000699;30984001;30108203;29976232;29440309;29391390;29338492;29233179;29102759;29032150;28496171;28277565;28186680;27391101;26380821;26296755;26118640;25869810;25414651;25224260;25040546;24932798;23638902;23561489;23487870;23481915;23462048;23402795;23313709;23053966;22750078;22720072;22584867;22548195;22431402;21927594;21808606;21622557;21576009;21490592;21490211;21403673;213…
GRM3		33965197;33686213;33319854;33256444;32203495;31340894;29042896;28786982;28659829;28655286;28108498;27296644;27130562;26187343;25950516;25914064;25848280;25414651;25209194;25150943;25096017;24844177;24765068;24758191;24680030;24631392;24498053;22728822;21886583;21557953;21344500;21281445;20675101;20638435;20132315;20060416;19482054;26953749;19451915;19439994;19403271;19132332;19125103;18979923;187…
GTF2IP1	WBSCR7
LINC00882
MIR124-2HG	LINC00966	26575220
RBM5-AS1
VPS9D1-AS1
ZSCAN16-AS1
TTC41P
C2orf92	LINC01125
IQANK1
ITGA9-AS1
SMG1P2
SMG1P5
HNRNPA1	HNRPA1
LINC01289
HIPK1-AS1
LINC01351
LINC01535
ACTG1P17
PRR29-AS1
CRYZL2P
HSP90AA2P	HSPCAL3, HSP90AA2
HSPD1	SPG13	27242348
LINC01877
LINC01896
HTR3B		32390801;28531893;27654063;21184810;19794330;18807291;16487942;15389765;12363396
ZNF710-AS1
MRPS30-DT
TEX52
IDH2
AP2A2	CLAPA2, ADTAB
AP3B2
JAK1	JAK1B
JRK
KCNH3		31654662
KCNK12
KCNK4
KCNN3		20933057;16393881;16086287;15389773;12960745;12898569;12808432;12497613;12007452;11501944;11395478;11331374;11311923;11121173;10813808;10402501;10395218;10395215;10196711;9866821
KCNS3		33940180;26980143;24170294;22937123
KHK
KIF5A	SPG10	31602316;18658164;17202467
KRT4	CYK4
LCN2		23272119
LIG4
LLGL2
VWA5A	LOH11CR2A
LRRFIP2
LY6E
LYN		33359735;15180479
MAN2A2
MANBA		27992301;27164557
MAP4K1
MAPK12	SAPK3
MAPKAPK3
MAPRE3
MAPT	DDPAC, MAPTL	32599581;32100139;31504236;31119452;27287230;27067015;23951236;20708332;18342564;18163405
MATN4
MATR3	MPD2
MBD2		25476119;24849540
MC1R
ARL2
ARPC3		32726629
MIP		33279456;30826260;30451122;30367955;30216787;29730395;27650194;26052224;24513303;23806580;23313563;22546005;18369462;12566931;9175116
MITF	WS2A, WS2	25449126
MKRN1		31602316
MLH1	COCA2
ASAH1	ASAH	32569620;21375364;18683247
MSR1
MT1JP	MT1, MT1NP, MT1J	34304635;28500770
MVK
MYO5C
NAT1	AAC1	11436130
NCAM1		27765579;27534376;26666204;25445624;25410365;24688456;24651862;24076151;23810830;22584867;27625800;19443631;19411161;18601968;18068248;17413444;17329232;17239033;17161382;16229822
NDUFS3		21084551;19441803
NDUFS5
ASTN1	ASTN	22488871;18384059
NEURL1	NEURL
NFATC1
NFIX
NFKB2
NGEF		31498969
ATF1
NOS2P2	NOS2B
NPTX1		25053281
NR1H3
NUCB2
NUDT8
OR7E14P	OR7E151P
ORC2	ORC2L
OTOF	DFNB9
PCDHA8		32366953
PCDHGB4
ALDH7A1	ATQ1
PER3		26630391;25798540;25525361;22832735;21176035;17969870
PGM3
PHF2		32068120;22648509
PLEC	EBS1, PLEC1
PLTP
PLXNB2
PNOC		11436130
B3GALNT1	B3GALT3
POLI	RAD3OB, RAD30B	19651477
PPFIA3
PPIL2
PPP1CC
PRC1		28505103
PRDX5
SLC26A5	PRES	33199411
PRKACB
PRKCD
PRKD3	PRKCN	26482417
ADGRB1	BAI1	21509575
PRPSAP2
BAP1
PSMD6
PTN	NEGF1	32868733;29391390;21907759
SIRPA	PTPNS1	32628676
PTPRS
RANGAP1	SD	34390981;34273149;34009292;33963865;33823684;33783301;33745319;33688928;33633607;33527565;33263727;33192706;33042277;33037178;32950620;32857162;32802953;32573985;32530472;32420523;32392557;32256073;32234106;32223276;32212948;32043238;31927303;31744751;31722018;31596458;31553412;31429909;31268507;31250787;30969333;30916714;30810050;30649180;30620405;30574748;30422257;30405395;30371642;30304337;302…
RARB		30532020
RBM6
REG1A	REG	26854986;24984193
UPF1	RENT1	33132159;29333258;26012578
