# Supplementary material for: A conditional gene-based association framework integrating isoform-level eQTL data reveals new susceptibility genes for schizophrenia
Source: eLife. 2022 Apr 12;11:e70779. doi: 10.7554/eLife.70779 (PMC9005191; doi:10.7554/eLife.70779)
Supplement: Table 6—source data 1. [file elife-70779-table6-data1.xlsx]

## Sheet: MAGMA
The drug-gene interaction term results of the potential susceptibility genes of schizophrenia identified by MAGMA in DGIdb.
search_term	match_term	match_type	gene	drug	interaction_types	sources	pmids
MPL	MPL	Definite	MPL	ROMIPLOSTIM	agonist	TdgClinicalTrial|ChemblInteractions|TEND|GuideToPharmacology|TTD	23250851
MPL	MPL	Definite	MPL	AVATROMBOPAG	agonist	ChemblInteractions|GuideToPharmacology|TTD
MPL	MPL	Definite	MPL	PICTILISIB		JAX-CKB	24251790
MPL	MPL	Definite	MPL	LUSUTROMBOPAG	agonist	GuideToPharmacology|TTD	22859611|29274361|26666417
MPL	MPL	Definite	MPL	MK-2206		JAX-CKB	23748344
MPL	MPL	Definite	MPL	ELTROMBOPAG OLAMINE	agonist	ChemblInteractions
MPL	MPL	Definite	MPL	ELTROMBOPAG	agonist	TdgClinicalTrial|TEND|GuideToPharmacology|TTD	19642221
MPL	MPL	Definite	MPL	PROMACTA		TTD
MPL	MPL	Definite	MPL	RUXOLITINIB		JAX-CKB	24251790
MPL	MPL	Definite	MPL	EVEROLIMUS		JAX-CKB	21725052
MPL	MPL	Definite	MPL	DACTOLISIB		JAX-CKB	24251790
KDM4A	KDM4A	Definite	KDM4A	CLOFAZIMINE		DTC
KDM4A	KDM4A	Definite	KDM4A	ERGOCRYPTINE		DTC
KDM4A	KDM4A	Definite	KDM4A	CHLOROGENIC ACID		DTC
KDM4A	KDM4A	Definite	KDM4A	MONTELUKAST SODIUM		DTC
KDM4A	KDM4A	Definite	KDM4A	CHEMBL1412489		DTC
KDM4A	KDM4A	Definite	KDM4A	CHEMBL600747		DTC
KDM4A	KDM4A	Definite	KDM4A	CHEMBL601605		DTC
KDM4A	KDM4A	Definite	KDM4A	EUPAFOLIN		DTC
KDM4A	KDM4A	Definite	KDM4A	ALTENUSIN		DTC
KDM4A	KDM4A	Definite	KDM4A	CHEMBL515252		DTC
KDM4A	KDM4A	Definite	KDM4A	RALOXIFENE HYDROCHLORIDE		DTC
KDM4A	KDM4A	Definite	KDM4A	CHEMBL316034		DTC
KDM4A	KDM4A	Definite	KDM4A	CHEMBL502057		DTC
KDM4A	KDM4A	Definite	KDM4A	4-METHYLDAPHNETIN		DTC
KDM4A	KDM4A	Definite	KDM4A	AFIMOXIFENE		DTC
KDM4A	KDM4A	Definite	KDM4A	CHEMBL606167		DTC
KDM4A	KDM4A	Definite	KDM4A	MITOXANTRONE		DTC
KDM4A	KDM4A	Definite	KDM4A	CHEMBL578512		DTC
KDM4A	KDM4A	Definite	KDM4A	PYRITHIONE		DTC
KDM4A	KDM4A	Definite	KDM4A	DIMETHYLPHENYLPIPERAZINIUM IODIDE		DTC
KDM4A	KDM4A	Definite	KDM4A	N-METHYL-D-ASPARTIC ACID (NMDA)		DTC
KDM4A	KDM4A	Definite	KDM4A	APOMORPHINE HYDROCHLORIDE HEMIHYDRATE		DTC
KDM4A	KDM4A	Definite	KDM4A	LOMOFUNGIN		DTC
KDM4A	KDM4A	Definite	KDM4A	CHEMBL582722		DTC
KDM4A	KDM4A	Definite	KDM4A	MERCAPTOPURINE		DTC
KDM4A	KDM4A	Definite	KDM4A	CHEMBL1989853		DTC
KDM4A	KDM4A	Definite	KDM4A	CHEMBL179611		DTC
KDM4A	KDM4A	Definite	KDM4A	CHEMBL1989750		DTC
KDM4A	KDM4A	Definite	KDM4A	CHEMBL589245		DTC
KDM4A	KDM4A	Definite	KDM4A	CHEMBL176599		DTC
KDM4A	KDM4A	Definite	KDM4A	MICONAZOLE		DTC
KDM4A	KDM4A	Definite	KDM4A	CHEMBL2002487		DTC
KDM4A	KDM4A	Definite	KDM4A	TOSUFLOXACIN TOSYLATE		DTC
KDM4A	KDM4A	Definite	KDM4A	CYCLOHETERPHYLLIN		DTC
KDM4A	KDM4A	Definite	KDM4A	CHEMBL1255660		DTC
KDM4A	KDM4A	Definite	KDM4A	CHEMBL493863		DTC
KDM4A	KDM4A	Definite	KDM4A	CHEMBL1609016		DTC
KDM4A	KDM4A	Definite	KDM4A	CHEMBL1287980		DTC
KDM4A	KDM4A	Definite	KDM4A	GUAIAZULEN		DTC
KDM4A	KDM4A	Definite	KDM4A	CHEMBL585622		DTC
KDM4A	KDM4A	Definite	KDM4A	CHEMBL1256510		DTC
KDM4A	KDM4A	Definite	KDM4A	CHEMBL2095095		DTC
KDM4A	KDM4A	Definite	KDM4A	CHEMBL56542		DTC
KDM4A	KDM4A	Definite	KDM4A	STICTIC ACID		DTC
KDM4A	KDM4A	Definite	KDM4A	CHEMBL28721		DTC
KDM4A	KDM4A	Definite	KDM4A	CEFOTAXIME SODIUM		DTC
KDM4A	KDM4A	Definite	KDM4A	CEFOXITIN SODIUM		DTC
KDM4A	KDM4A	Definite	KDM4A	CHEMBL1519374		DTC
KDM4A	KDM4A	Definite	KDM4A	CARMINIC ACID		DTC
KDM4A	KDM4A	Definite	KDM4A	PRALIDOXIME IODIDE		DTC
KDM4A	KDM4A	Definite	KDM4A	CHEMBL275177		DTC
KDM4A	KDM4A	Definite	KDM4A	SOLYPERTINE TARTRATE		DTC
KDM4A	KDM4A	Definite	KDM4A	ENCLOMIPHENE CITRATE		DTC
KDM4A	KDM4A	Definite	KDM4A	TYRPHOSTIN 51		DTC
KDM4A	KDM4A	Definite	KDM4A	CHEMBL588038		DTC
KDM4A	KDM4A	Definite	KDM4A	OXYTETRACYCLINE		DTC
KDM4A	KDM4A	Definite	KDM4A	CHEMBL2094484		DTC
KDM4A	KDM4A	Definite	KDM4A	METHYLMALONIC ACID		DTC
KDM4A	KDM4A	Definite	KDM4A	CHEMBL602150		DTC
KDM4A	KDM4A	Definite	KDM4A	TENOXICAM		DTC
KDM4A	KDM4A	Definite	KDM4A	CHEMBL515505		DTC
KDM4A	KDM4A	Definite	KDM4A	CHEMBL224032		DTC
KDM4A	KDM4A	Definite	KDM4A	CHEMBL1585652		DTC
KDM4A	KDM4A	Definite	KDM4A	EMODIN		DTC
KDM4A	KDM4A	Definite	KDM4A	CLOTRIMAZOLE		DTC
KDM4A	KDM4A	Definite	KDM4A	S-NITROSOGLUTATHIONE		DTC
KDM4A	KDM4A	Definite	KDM4A	PROTOPORPHYRIN DISODIUM		DTC
KDM4A	KDM4A	Definite	KDM4A	RAFOXANIDE		DTC
KDM4A	KDM4A	Definite	KDM4A	CHEMBL101815		DTC
KDM4A	KDM4A	Definite	KDM4A	KAINIC ACID		DTC
KDM4A	KDM4A	Definite	KDM4A	CHEMBL1814509		DTC
KDM4A	KDM4A	Definite	KDM4A	PYROGALLOL RED		DTC
KDM4A	KDM4A	Definite	KDM4A	CETIRIZINE HYDROCHLORIDE		DTC
KDM4A	KDM4A	Definite	KDM4A	CAFFEIC ACID PHENETHYL ESTER		DTC
KDM4A	KDM4A	Definite	KDM4A	2-PICOLINIC ACID		DTC
KDM4A	KDM4A	Definite	KDM4A	CHEMBL86464		DTC
KDM4A	KDM4A	Definite	KDM4A	GLYASPERIN D		DTC
KDM4A	KDM4A	Definite	KDM4A	CHEMBL1256325		DTC
KDM4A	KDM4A	Definite	KDM4A	METHACYCLINE HYDROCHLORIDE		DTC
KDM4A	KDM4A	Definite	KDM4A	HEXACHLOROPHENE		DTC
KDM4A	KDM4A	Definite	KDM4A	CHEMBL602776		DTC
KDM4A	KDM4A	Definite	KDM4A	PHYSODIC ACID		DTC
KDM4A	KDM4A	Definite	KDM4A	DOPAMINE HYDROCHLORIDE		DTC
KDM4A	KDM4A	Definite	KDM4A	CHEMBL578905		DTC
KDM4A	KDM4A	Definite	KDM4A	CHEMBL1270169		DTC
KDM4A	KDM4A	Definite	KDM4A	CHEMBL534288		DTC
KDM4A	KDM4A	Definite	KDM4A	CHEMBL1504762		DTC
KDM4A	KDM4A	Definite	KDM4A	N-METHYLHISTAMINE DIHYDROCHLORIDE		DTC
KDM4A	KDM4A	Definite	KDM4A	CEFUROXIME SODIUM		DTC
KDM4A	KDM4A	Definite	KDM4A	CHLOROXINE		DTC
KDM4A	KDM4A	Definite	KDM4A	OXIDOPAMINE HYDROCHLORIDE		DTC
KDM4A	KDM4A	Definite	KDM4A	GLICLAZIDE		DTC
KDM4A	KDM4A	Definite	KDM4A	ACID BLUE 129		DTC
KDM4A	KDM4A	Definite	KDM4A	METHIOTHEPIN MESYLATE		DTC
KDM4A	KDM4A	Definite	KDM4A	ENALAPRIL MALEATE		DTC
KDM4A	KDM4A	Definite	KDM4A	GERONTOXANTHONE H		DTC
KDM4A	KDM4A	Definite	KDM4A	CHEMBL1701915		DTC
KDM4A	KDM4A	Definite	KDM4A	EBSELEN		DTC
KDM4A	KDM4A	Definite	KDM4A	CHEMBL1546228		DTC
KDM4A	KDM4A	Definite	KDM4A	CHEMBL528694		DTC
KDM4A	KDM4A	Definite	KDM4A	CHEMBL578675		DTC
KDM4A	KDM4A	Definite	KDM4A	THIETHYLPERAZINE MALATE		DTC
KDM4A	KDM4A	Definite	KDM4A	CHEMBL1503729		DTC
KDM4A	KDM4A	Definite	KDM4A	CHEMBL548629		DTC
KDM4A	KDM4A	Definite	KDM4A	CHEMBL592124		DTC
KDM4A	KDM4A	Definite	KDM4A	CHEMBL590927		DTC
KDM4A	KDM4A	Definite	KDM4A	INDOCYANINE GREEN		DTC
KDM4A	KDM4A	Definite	KDM4A	BIFONAZOLE		DTC
KDM4A	KDM4A	Definite	KDM4A	CHEMBL458094		DTC
KDM4A	KDM4A	Definite	KDM4A	CHEMBL1287983		DTC
KDM4A	KDM4A	Definite	KDM4A	CHEMBL578878		DTC
KDM4A	KDM4A	Definite	KDM4A	PIROXICAM		DTC
KDM4A	KDM4A	Definite	KDM4A	ENCLOMIPHENE		DTC
KDM4A	KDM4A	Definite	KDM4A	CLOXYQUIN		DTC
KDM4A	KDM4A	Definite	KDM4A	ORPHENADRINE CITRATE		DTC
KDM4A	KDM4A	Definite	KDM4A	CHEMBL590949		DTC
KDM4A	KDM4A	Definite	KDM4A	CHEMBL1498652		DTC
KDM4A	KDM4A	Definite	KDM4A	SALICYLALDEHYDE THIOSEMICARBAZONE		DTC
KDM4A	KDM4A	Definite	KDM4A	SALSOLINOL HYDROBROMIDE		DTC
KDM4A	KDM4A	Definite	KDM4A	TOLAZAMIDE		DTC
KDM4A	KDM4A	Definite	KDM4A	CHEMBL1304363		DTC
KDM4A	KDM4A	Definite	KDM4A	CHEMBL184450		DTC
KDM4A	KDM4A	Definite	KDM4A	CEFOTETAN		DTC
KDM4A	KDM4A	Definite	KDM4A	CHEMBL602969		DTC
KDM4A	KDM4A	Definite	KDM4A	CLOSANTEL		DTC
KDM4A	KDM4A	Definite	KDM4A	TETRYDAMINE		DTC
KDM4A	KDM4A	Definite	KDM4A	THIOINOSINE		DTC
KDM4A	KDM4A	Definite	KDM4A	CEFAMANDOLE SODIUM		DTC
KDM4A	KDM4A	Definite	KDM4A	BUTOCONAZOLE NITRATE		DTC
KDM4A	KDM4A	Definite	KDM4A	QUISQUALATE		DTC
KDM4A	KDM4A	Definite	KDM4A	CHEMBL500812		DTC
KDM4A	KDM4A	Definite	KDM4A	CINTAZONE		DTC
KDM4A	KDM4A	Definite	KDM4A	CHEMBL553503		DTC
KDM4A	KDM4A	Definite	KDM4A	CHEMBL339587		DTC
KDM4A	KDM4A	Definite	KDM4A	DIPROTIN A		DTC
KDM4A	KDM4A	Definite	KDM4A	CHEMBL586937		DTC
KDM4A	KDM4A	Definite	KDM4A	CHEMBL467987		DTC
KDM4A	KDM4A	Definite	KDM4A	CHEMBL602718		DTC
KDM4A	KDM4A	Definite	KDM4A	RANOLAZINE HYDROCHLORIDE		DTC
KDM4A	KDM4A	Definite	KDM4A	CEPHARANTHINE		DTC
KDM4A	KDM4A	Definite	KDM4A	CRYPTOTANSHINONE		DTC
KDM4A	KDM4A	Definite	KDM4A	OLEOYL DOPAMINE		DTC
KDM4A	KDM4A	Definite	KDM4A	NITRILOTRIACETIC ACID		DTC
KDM4A	KDM4A	Definite	KDM4A	N-OXALYLGLYCINE		DTC	19359167
KDM4A	KDM4A	Definite	KDM4A	CHEMBL136344		DTC
KDM4A	KDM4A	Definite	KDM4A	CHEMBL602135		DTC
KDM4A	KDM4A	Definite	KDM4A	CHEMBL578257		DTC
KDM4A	KDM4A	Definite	KDM4A	ACITRETIN		DTC
KDM4A	KDM4A	Definite	KDM4A	NOREPINEPHRINE		DTC
KDM4A	KDM4A	Definite	KDM4A	VANOXERINE		DTC
KDM4A	KDM4A	Definite	KDM4A	CHEMBL602213		DTC
KDM4A	KDM4A	Definite	KDM4A	CHEMBL1327172		DTC
KDM4A	KDM4A	Definite	KDM4A	THIOGUANOSINE		DTC
KDM4A	KDM4A	Definite	KDM4A	CHEMBL533226		DTC
KDM4A	KDM4A	Definite	KDM4A	BENSERAZIDE HYDROCHLORIDE		DTC
KDM4A	KDM4A	Definite	KDM4A	CHEMBL602206		DTC
KDM4A	KDM4A	Definite	KDM4A	CHEMBL175266		DTC
KDM4A	KDM4A	Definite	KDM4A	ESCITALOPRAM OXALATE		DTC
KDM4A	KDM4A	Definite	KDM4A	CHEMBL1466186		DTC
KDM4A	KDM4A	Definite	KDM4A	PROCHLORPERAZINE		DTC
KDM4A	KDM4A	Definite	KDM4A	THIOGUANINE		DTC
KDM4A	KDM4A	Definite	KDM4A	CHEMBL1307453		DTC
KDM4A	KDM4A	Definite	KDM4A	CHEMBL1527		DTC
KDM4A	KDM4A	Definite	KDM4A	0-HEXYL-1,3-DIAMINE-PLATINUM 2,2-DICHLORIDE		DTC
KDM4A	KDM4A	Definite	KDM4A	LAVENDUSTIN B		DTC
KDM4A	KDM4A	Definite	KDM4A	CEFIXIME		DTC
KDM4A	KDM4A	Definite	KDM4A	CHEMBL576409		DTC
KDM4A	KDM4A	Definite	KDM4A	RESCINNAMINE		DTC
KDM4A	KDM4A	Definite	KDM4A	4-CHLOROMERCURIBENZOIC ACID		DTC
KDM4A	KDM4A	Definite	KDM4A	CHEMBL220845		DTC
KDM4A	KDM4A	Definite	KDM4A	CHEMBL585656		DTC
KDM4A	KDM4A	Definite	KDM4A	OMEPRAZOLE		DTC
KDM4A	KDM4A	Definite	KDM4A	GERONTOXANTHONE I		DTC
KDM4A	KDM4A	Definite	KDM4A	CHEMBL1412002		DTC
KDM4A	KDM4A	Definite	KDM4A	CHEMBL591370		DTC
KDM4A	KDM4A	Definite	KDM4A	CHEMBL388979		DTC
KDM4A	KDM4A	Definite	KDM4A	CHEMBL584868		DTC
KDM4A	KDM4A	Definite	KDM4A	CHEMBL1255944		DTC
KDM4A	KDM4A	Definite	KDM4A	FENRETINIDE		DTC
KDM4A	KDM4A	Definite	KDM4A	CHEMBL1232076		DTC
KDM4A	KDM4A	Definite	KDM4A	MALTOL		DTC
KDM4A	KDM4A	Definite	KDM4A	CEPHAPIRIN SODIUM		DTC
KDM4A	KDM4A	Definite	KDM4A	CHEMBL307893		DTC
KDM4A	KDM4A	Definite	KDM4A	CHEMBL1448793		DTC
KDM4A	KDM4A	Definite	KDM4A	CHEMBL581044		DTC
KDM4A	KDM4A	Definite	KDM4A	PYRAZINOIC ACID		DTC
KDM4A	KDM4A	Definite	KDM4A	BENZANTHRONE		DTC
KDM4A	KDM4A	Definite	KDM4A	DOXYCYCLINE HYCLATE		DTC
KDM4A	KDM4A	Definite	KDM4A	FASUDIL HYDROCHLORIDE		DTC
KDM4A	KDM4A	Definite	KDM4A	CHEMBL256062		DTC
KDM4A	KDM4A	Definite	KDM4A	CHEMBL598663		DTC
KDM4A	KDM4A	Definite	KDM4A	CHEMBL517186		DTC
KDM4A	KDM4A	Definite	KDM4A	CHEMBL260311		DTC
KDM4A	KDM4A	Definite	KDM4A	TOREMIFENE CITRATE		DTC
KDM4A	KDM4A	Definite	KDM4A	MINAPRINE HYDROCHLORIDE		DTC
KDM4A	KDM4A	Definite	KDM4A	2-MERCAPTONICOTINIC ACID		DTC
KDM4A	KDM4A	Definite	KDM4A	FRAXETIN		DTC
KDM4A	KDM4A	Definite	KDM4A	PHOSPHOMETHYLPHOSPHONIC ACID ADENOSYL ESTER		DTC
KDM4A	KDM4A	Definite	KDM4A	CHEMBL1486366		DTC
KDM4A	KDM4A	Definite	KDM4A	NORDIHYDROGUAIARETIC ACID		DTC
KDM4A	KDM4A	Definite	KDM4A	PARAROSANILINE		DTC
KDM4A	KDM4A	Definite	KDM4A	TAMOXIFEN		DTC
KDM4A	KDM4A	Definite	KDM4A	CHEMBL584269		DTC
KDM4A	KDM4A	Definite	KDM4A	POMIFERIN		DTC
KDM4A	KDM4A	Definite	KDM4A	CHEMBL589694		DTC
KDM4A	KDM4A	Definite	KDM4A	CARBETAPENTANE CITRATE		DTC
KDM4A	KDM4A	Definite	KDM4A	CHEMBL593211		DTC
KDM4A	KDM4A	Definite	KDM4A	CHEMBL156959		DTC
KDM4A	KDM4A	Definite	KDM4A	CHEMBL463783		DTC
KDM4A	KDM4A	Definite	KDM4A	CEFOTIAM HYDROCHLORIDE		DTC
KDM4A	KDM4A	Definite	KDM4A	CHEMBL114544		DTC
KDM4A	KDM4A	Definite	KDM4A	CHEMBL587579		DTC
KDM4A	KDM4A	Definite	KDM4A	RABEPRAZOLE SODIUM		DTC
KDM4A	KDM4A	Definite	KDM4A	GALLIC ACID METHYL ESTER		DTC
KDM4A	KDM4A	Definite	KDM4A	CHEMBL258756		DTC
KDM4A	KDM4A	Definite	KDM4A	CHEMBL235891		DTC
KDM4A	KDM4A	Definite	KDM4A	SLAZINIC ACID		DTC
KDM4A	KDM4A	Definite	KDM4A	CEFSULODIN SODIUM		DTC
KDM4A	KDM4A	Definite	KDM4A	CHEMBL547285		DTC
KDM4A	KDM4A	Definite	KDM4A	CHEMBL234338		DTC
KDM4A	KDM4A	Definite	KDM4A	NANAOMYCIN		DTC
KDM4A	KDM4A	Definite	KDM4A	CHEMBL492651		DTC
KDM4A	KDM4A	Definite	KDM4A	CHEMBL1363249		DTC
KDM4A	KDM4A	Definite	KDM4A	PIMOZIDE		DTC
KDM4A	KDM4A	Definite	KDM4A	CHEMBL1442783		DTC
KDM4A	KDM4A	Definite	KDM4A	CHEMBL118678		DTC
KDM4A	KDM4A	Definite	KDM4A	HARMAN-3-CARBOXYLIC ACID		DTC
KDM4A	KDM4A	Definite	KDM4A	CHEMBL588250		DTC
KDM4A	KDM4A	Definite	KDM4A	PENTACHLOROPHENOL		DTC
KDM4A	KDM4A	Definite	KDM4A	CHEMBL538104		DTC
KDM4A	KDM4A	Definite	KDM4A	CHEMBL523200		DTC
KDM4A	KDM4A	Definite	KDM4A	GALUTEOLIN		DTC
KDM4A	KDM4A	Definite	KDM4A	ACETOSIDE		DTC
KDM4A	KDM4A	Definite	KDM4A	MERCAPTOPURINE		DTC
KDM4A	KDM4A	Definite	KDM4A	CHEMBL1255647		DTC
KDM4A	KDM4A	Definite	KDM4A	CHLORTETRACYCLINE HYDROCHLORIDE		DTC
KDM4A	KDM4A	Definite	KDM4A	CHEMBL586000		DTC
KDM4A	KDM4A	Definite	KDM4A	CHEMBL584635		DTC
KDM4A	KDM4A	Definite	KDM4A	CHEMBL600298		DTC
KDM4A	KDM4A	Definite	KDM4A	MYRICETIN		DTC
KDM4A	KDM4A	Definite	KDM4A	HAEMATOXYLIN		DTC
KDM4A	KDM4A	Definite	KDM4A	OXYPHENBUTAZONE		DTC
KDM4A	KDM4A	Definite	KDM4A	CHEMBL338115		DTC
KDM4A	KDM4A	Definite	KDM4A	ISOKAEMPFERIDE		DTC
KDM4A	KDM4A	Definite	KDM4A	MECLIZINE DIHCL		DTC
KDM4A	KDM4A	Definite	KDM4A	CHEMBL591618		DTC
KDM4A	KDM4A	Definite	KDM4A	COLCHICEINE		DTC
KDM4A	KDM4A	Definite	KDM4A	CHEMBL582478		DTC
KDM4A	KDM4A	Definite	KDM4A	PURPURIN		DTC
KDM4A	KDM4A	Definite	KDM4A	CHEMBL555260		DTC
KDM4A	KDM4A	Definite	KDM4A	CHEMBL316589		DTC
KDM4A	KDM4A	Definite	KDM4A	CHEMBL527336		DTC
KDM4A	KDM4A	Definite	KDM4A	MIFEPRISTONE		DTC
KDM4A	KDM4A	Definite	KDM4A	ERBSTATIN		DTC
KDM4A	KDM4A	Definite	KDM4A	CEFAZOLIN		DTC
KDM4A	KDM4A	Definite	KDM4A	FAMOTIDINE		DTC
KDM4A	KDM4A	Definite	KDM4A	CHEMBL592068		DTC
KDM4A	KDM4A	Definite	KDM4A	GALLAMINE TRIETHIODIDE		DTC
KDM4A	KDM4A	Definite	KDM4A	KETOCONAZOLE		DTC
KDM4A	KDM4A	Definite	KDM4A	CHEMBL116548		DTC
KDM4A	KDM4A	Definite	KDM4A	CHEMBL603739		DTC
KDM4A	KDM4A	Definite	KDM4A	GW7647		DTC
KDM4A	KDM4A	Definite	KDM4A	CHEMBL589912		DTC
KDM4A	KDM4A	Definite	KDM4A	GARCINONE E		DTC
KDM4A	KDM4A	Definite	KDM4A	L-NOREPINEPHRINE		DTC
KDM4A	KDM4A	Definite	KDM4A	OMEPRAZOLE MAGNESIUM		DTC
KDM4A	KDM4A	Definite	KDM4A	LAVENDUSTIN C		DTC
KDM4A	KDM4A	Definite	KDM4A	CLIOQUINOL		DTC
KDM4A	KDM4A	Definite	KDM4A	DIOTYROSINE		DTC
KDM4A	KDM4A	Definite	KDM4A	CHEMBL599098		DTC
KDM4A	KDM4A	Definite	KDM4A	FLUSPIRILENE		DTC
KDM4A	KDM4A	Definite	KDM4A	CHEMBL445304		DTC
KDM4A	KDM4A	Definite	KDM4A	CHEMBL579550		DTC
KDM4A	KDM4A	Definite	KDM4A	DOCEBENONE		DTC
KDM4A	KDM4A	Definite	KDM4A	OLEIC ACID		DTC
KDM4A	KDM4A	Definite	KDM4A	CHEMBL1367933		DTC
KDM4A	KDM4A	Definite	KDM4A	CHEMBL1306556		DTC
KDM4A	KDM4A	Definite	KDM4A	FLUPHENAZINE HYDROCHLORIDE		DTC
KDM4A	KDM4A	Definite	KDM4A	CHEMBL600738		DTC
KDM4A	KDM4A	Definite	KDM4A	CHEMBL530049		DTC
KDM4A	KDM4A	Definite	KDM4A	CITRIC ACID		DTC
KDM4A	KDM4A	Definite	KDM4A	XANTHURENATE		DTC
KDM4A	KDM4A	Definite	KDM4A	CHEMBL533602		DTC
KDM4A	KDM4A	Definite	KDM4A	CHEMBL258767		DTC
KDM4A	KDM4A	Definite	KDM4A	CHEMBL477936		DTC
KDM4A	KDM4A	Definite	KDM4A	CHEMBL461579		DTC
KDM4A	KDM4A	Definite	KDM4A	BROXYQUINOLINE		DTC
KDM4A	KDM4A	Definite	KDM4A	CHEMBL119878		DTC
KDM4A	KDM4A	Definite	KDM4A	PURPUROGALLIN		DTC
KDM4A	KDM4A	Definite	KDM4A	HYDROXYZINE HYDROCHLORIDE		DTC
KDM4A	KDM4A	Definite	KDM4A	CHEMBL547483		DTC
KDM4A	KDM4A	Definite	KDM4A	DEOXYVASICINONE		DTC
KDM4A	KDM4A	Definite	KDM4A	PICEATANNOL		DTC
KDM4A	KDM4A	Definite	KDM4A	ISOPROPAMIDE IODIDE		DTC
KDM4A	KDM4A	Definite	KDM4A	GR-127935		DTC
KDM4A	KDM4A	Definite	KDM4A	CHEMBL1451216		DTC
KDM4A	KDM4A	Definite	KDM4A	DISULFIRAM		DTC
KDM4A	KDM4A	Definite	KDM4A	DIOSMIN		DTC
KDM4A	KDM4A	Definite	KDM4A	RESERPINE		DTC
KDM4A	KDM4A	Definite	KDM4A	CHEMBL586031		DTC
KDM4A	KDM4A	Definite	KDM4A	FANCHININ		DTC
KDM4A	KDM4A	Definite	KDM4A	CHEMBL600778		DTC
KDM4A	KDM4A	Definite	KDM4A	RHEIN		DTC
KDM4A	KDM4A	Definite	KDM4A	CHEMBL547833		DTC
KDM4A	KDM4A	Definite	KDM4A	STREPTONIGRIN		DTC
KDM4A	KDM4A	Definite	KDM4A	QUINOLINIC ACID		DTC
KDM4A	KDM4A	Definite	KDM4A	TANSHINONE I		DTC
KDM4A	KDM4A	Definite	KDM4A	TAMOXIFEN CITRATE		DTC
KDM4A	KDM4A	Definite	KDM4A	CHEMBL495852		DTC
KDM4A	KDM4A	Definite	KDM4A	XANTHOANGELOL F		DTC
KDM4A	KDM4A	Definite	KDM4A	CHEMBL585502		DTC
KDM4A	KDM4A	Definite	KDM4A	CHEMBL429095		DTC
KDM4A	KDM4A	Definite	KDM4A	TANSHINONE IIA		DTC
KDM4A	KDM4A	Definite	KDM4A	N,N'-DIPHENYL-P-PHENYLENEDIAMINE		DTC
KDM4A	KDM4A	Definite	KDM4A	CHEMBL1504679		DTC
KDM4A	KDM4A	Definite	KDM4A	SUFENTANIL CITRATE		DTC
KDM4A	KDM4A	Definite	KDM4A	CHEMBL199592		DTC
KDM4A	KDM4A	Definite	KDM4A	PROCHLORPERAZINE EDISYLATE		DTC
KDM4A	KDM4A	Definite	KDM4A	AMBUNOL		DTC
KDM4A	KDM4A	Definite	KDM4A	ALVERINE CITRATE		DTC
KDM4A	KDM4A	Definite	KDM4A	CHEMBL1728638		DTC
KDM4A	KDM4A	Definite	KDM4A	CHEMBL1255836		DTC
KDM4A	KDM4A	Definite	KDM4A	3,4-DIHYDROXYPHENYLACETIC ACID		DTC
KDM4A	KDM4A	Definite	KDM4A	PROTOCATECHUALDEHYDE		DTC
KDM4A	KDM4A	Definite	KDM4A	ELLAGIC ACID		DTC
KDM4A	KDM4A	Definite	KDM4A	THIMEROSAL		DTC
KDM4A	KDM4A	Definite	KDM4A	LEVODOPA		DTC
KDM4A	KDM4A	Definite	KDM4A	5-METHOXYTRYPTAMINE		DTC
KDM4A	KDM4A	Definite	KDM4A	CEFACLOR		DTC
KDM4A	KDM4A	Definite	KDM4A	CHEMBL312032		DTC
KDM4A	KDM4A	Definite	KDM4A	CHEMBL2002849		DTC
KDM4A	KDM4A	Definite	KDM4A	CHEMBL2094532		DTC
KDM4A	KDM4A	Definite	KDM4A	LUTEOLIN		DTC
KDM4A	KDM4A	Definite	KDM4A	SANGUINARINE SULFATE		DTC
KDM4A	KDM4A	Definite	KDM4A	THIORIDAZINE HYDROCHLORIDE		DTC
KDM4A	KDM4A	Definite	KDM4A	SKF-38393		DTC
KDM4A	KDM4A	Definite	KDM4A	CALMIDAZOLIUM CHLORIDE		DTC
KDM4A	KDM4A	Definite	KDM4A	CHEMBL428064		DTC
KDM4A	KDM4A	Definite	KDM4A	IODOQUINOL		DTC
KDM4A	KDM4A	Definite	KDM4A	SCLEROTIORIN		DTC
KDM4A	KDM4A	Definite	KDM4A	CYCLOVALONE		DTC
KDM4A	KDM4A	Definite	KDM4A	CHEMBL1576310		DTC
KDM4A	KDM4A	Definite	KDM4A	CHEMBL1256660		DTC
KDM4A	KDM4A	Definite	KDM4A	CHEMBL505670		DTC
KDM4A	KDM4A	Definite	KDM4A	GLUTAMIC ACID HYDROCHLORIDE		DTC
KDM4A	KDM4A	Definite	KDM4A	CHEMBL580155		DTC
KDM4A	KDM4A	Definite	KDM4A	CHEMBL1601846		DTC
KDM4A	KDM4A	Definite	KDM4A	CHEMBL603154		DTC
KDM4A	KDM4A	Definite	KDM4A	CHEMBL2094833		DTC
KDM4A	KDM4A	Definite	KDM4A	AZASERINE		DTC
KDM4A	KDM4A	Definite	KDM4A	CHEMBL527584		DTC
KDM4A	KDM4A	Definite	KDM4A	CHEMBL592611		DTC
KDM4A	KDM4A	Definite	KDM4A	CHEMBL538542		DTC
KDM4A	KDM4A	Definite	KDM4A	DOMOIC ACID		DTC
KDM4A	KDM4A	Definite	KDM4A	CHEMBL227959		DTC
KDM4A	KDM4A	Definite	KDM4A	HYDROXYZINE PAMOATE		DTC
KDM4A	KDM4A	Definite	KDM4A	SENNOSIDE B		DTC
KDM4A	KDM4A	Definite	KDM4A	CHEMBL581677		DTC
KDM4A	KDM4A	Definite	KDM4A	CHEMBL297304		DTC
KDM4A	KDM4A	Definite	KDM4A	MALEIC ACID		DTC
KDM4A	KDM4A	Definite	KDM4A	CEPHALOTHIN		DTC
KDM4A	KDM4A	Definite	KDM4A	CHLORPROMAZINE HYDROCHLORIDE		DTC
KDM4A	KDM4A	Definite	KDM4A	CHEMBL1507526		DTC
KDM4A	KDM4A	Definite	KDM4A	CHEMBL591126		DTC
KDM4A	KDM4A	Definite	KDM4A	CHEMBL579919		DTC
KDM4A	KDM4A	Definite	KDM4A	INDINAVIR SULFATE		DTC
KDM4A	KDM4A	Definite	KDM4A	CHEMBL592123		DTC
KDM4A	KDM4A	Definite	KDM4A	PROTOPORPHYRIN		DTC
KDM4A	KDM4A	Definite	KDM4A	DIETHYLCARBAMAZINE CITRATE		DTC
KDM4A	KDM4A	Definite	KDM4A	DEPHOSTATIN		DTC
KDM4A	KDM4A	Definite	KDM4A	CHEMBL587092		DTC
KDM4A	KDM4A	Definite	KDM4A	DEFERIPRONE		DTC
KDM4A	KDM4A	Definite	KDM4A	A-443654		DTC
KDM4A	KDM4A	Definite	KDM4A	CHEMBL505209		DTC
KDM4A	KDM4A	Definite	KDM4A	CHEMBL606166		DTC
KDM4A	KDM4A	Definite	KDM4A	DEMECLOCYCLINE HYDROCHLORIDE		DTC
KDM4A	KDM4A	Definite	KDM4A	WIN-552122		DTC
KDM4A	KDM4A	Definite	KDM4A	CHEMBL284609		DTC
KDM4A	KDM4A	Definite	KDM4A	HYDROXYTYROSOL		DTC
KDM4A	KDM4A	Definite	KDM4A	NITROXOLINE		DTC
KDM4A	KDM4A	Definite	KDM4A	CHEMBL599013		DTC
KDM4A	KDM4A	Definite	KDM4A	SALINAZID		DTC
KDM4A	KDM4A	Definite	KDM4A	CAPSAZEPINE		DTC
KDM4A	KDM4A	Definite	KDM4A	ROXARSONE		DTC
KDM4A	KDM4A	Definite	KDM4A	CHEMBL522983		DTC
KDM4A	KDM4A	Definite	KDM4A	MITOXANTRONE HYDROCHLORIDE		DTC
KDM4A	KDM4A	Definite	KDM4A	CEFDINIR		DTC
KDM4A	KDM4A	Definite	KDM4A	METHYLDOPA		DTC
KDM4A	KDM4A	Definite	KDM4A	CHEMBL476025		DTC
KDM4A	KDM4A	Definite	KDM4A	ASTERRIC ACID		DTC
KDM4A	KDM4A	Definite	KDM4A	CARBIDOPA		DTC
KDM4A	KDM4A	Definite	KDM4A	CHEMBL1257092		DTC
KDM4A	KDM4A	Definite	KDM4A	CHEMBL602363		DTC
KDM4A	KDM4A	Definite	KDM4A	CHEMBL599255		DTC
KDM4A	KDM4A	Definite	KDM4A	CHEMBL56393		DTC
KDM4A	KDM4A	Definite	KDM4A	CHEMBL531268		DTC
KDM4A	KDM4A	Definite	KDM4A	CHEMBL1465049		DTC
KDM4A	KDM4A	Definite	KDM4A	CHEMBL581251		DTC
KDM4A	KDM4A	Definite	KDM4A	BROXURIDINE		DTC
KDM4A	KDM4A	Definite	KDM4A	SERTACONAZOLE NITRATE		DTC
KDM4A	KDM4A	Definite	KDM4A	CHEMBL546649		DTC
KDM4A	KDM4A	Definite	KDM4A	CHEMBL1408276		DTC
KDM4A	KDM4A	Definite	KDM4A	CHEMBL601757		DTC
KDM4A	KDM4A	Definite	KDM4A	CHEMBL534423		DTC
KDM4A	KDM4A	Definite	KDM4A	PHENELZINE SULFATE		DTC
KDM4A	KDM4A	Definite	KDM4A	CHEMBL590186		DTC
KDM4A	KDM4A	Definite	KDM4A	CHEMBL565893		DTC
KDM4A	KDM4A	Definite	KDM4A	CHEMBL592600		DTC
KDM4A	KDM4A	Definite	KDM4A	CHEMBL139935		DTC
KDM4A	KDM4A	Definite	KDM4A	CHEMBL1255656		DTC
KDM4A	KDM4A	Definite	KDM4A	CHEMBL1565444		DTC
KDM4A	KDM4A	Definite	KDM4A	PHENANTHROLINE		DTC
KDM4A	KDM4A	Definite	KDM4A	CHEMBL1256738		DTC
KDM4A	KDM4A	Definite	KDM4A	ISOORIENTIN		DTC
KDM4A	KDM4A	Definite	KDM4A	CHEMBL591137		DTC
KDM4A	KDM4A	Definite	KDM4A	CHEMBL53898		DTC
KDM4A	KDM4A	Definite	KDM4A	BENZOXAZOLINONE		DTC
KDM4A	KDM4A	Definite	KDM4A	CATECHOL		DTC
KDM4A	KDM4A	Definite	KDM4A	METRAZOLINE OXALATE		DTC
KDM4A	KDM4A	Definite	KDM4A	CHEMBL584514		DTC
KDM4A	KDM4A	Definite	KDM4A	CHEMBL125044		DTC
KDM4A	KDM4A	Definite	KDM4A	CHEMBL1567571		DTC
KDM4A	KDM4A	Definite	KDM4A	CHEMBL591412		DTC
KDM4A	KDM4A	Definite	KDM4A	CHEMBL582099		DTC
KDM4A	KDM4A	Definite	KDM4A	FENOLDOPAM MESYLATE		DTC
KDM4A	KDM4A	Definite	KDM4A	CHEMBL538798		DTC
KDM4A	KDM4A	Definite	KDM4A	CHEMBL1310138		DTC
KDM4A	KDM4A	Definite	KDM4A	CHEMBL1388703		DTC
KDM4A	KDM4A	Definite	KDM4A	CHEMBL609628		DTC
KDM4A	KDM4A	Definite	KDM4A	CHEMBL600734		DTC
KDM4A	KDM4A	Definite	KDM4A	CEPHALOCHROMIN		DTC
KDM4A	KDM4A	Definite	KDM4A	CHEMBL252417		DTC
KDM4A	KDM4A	Definite	KDM4A	ATHRAQUINONES A		DTC
KDM4A	KDM4A	Definite	KDM4A	CHEMBL478324		DTC
KDM4A	KDM4A	Definite	KDM4A	FLUPIRTINE MALEATE		DTC
KDM4A	KDM4A	Definite	KDM4A	EMBELIN		DTC
KDM4A	KDM4A	Definite	KDM4A	TERPYRIDINE		DTC
KDM4A	KDM4A	Definite	KDM4A	ALEXIDINE HYDROCHLORIDE		DTC
KDM4A	KDM4A	Definite	KDM4A	NAFRONYL OXALATE		DTC
KDM4A	KDM4A	Definite	KDM4A	CHEMBL1526167		DTC
KDM4A	KDM4A	Definite	KDM4A	CHEMBL122355		DTC
KDM4A	KDM4A	Definite	KDM4A	CHEMBL151797		DTC
DPYD	DPYD	Definite	DPYD	CAPECITABINE		NCI|CGI|CIViC|FDA	16279094|23988873
DPYD	DPYD	Definite	DPYD	TEGAFUR		NCI|CGI|CIViC|PharmGKB	12209976|28950804|24923815|30858516|23603345|16115930|27122156|31382864|22490566|9470816|18600527|15944764|26603945|18443386|17700593|17165084|17000685|19530960|26794347|19795123|12360106|19473056|9439663|26099996|26216193|27864592|17121937|18299612|28295243|15132136|20819423|27995989|16151913|15017333|24817302|30114658|29846282|9323575|29134491|23988873|17203168|11895907|32378051|25677447|170648…
DPYD	DPYD	Definite	DPYD	FLUOROURACIL		NCI|CIViC|TTD|FDA	16421754|15330204|17179731|23988873|15538739|11501504|31871216
DPYD	DPYD	Definite	DPYD	IRINOTECAN		PharmGKB	28395759
DPYD	DPYD	Definite	DPYD	LEUCOVORIN		NCI|CIViC|PharmGKB	11977552|12576451|31871216
DPYD	DPYD	Definite	DPYD	FLUCYTOSINE		PharmGKB
DPYD	DPYD	Definite	DPYD	ENILURACIL		TdgClinicalTrial|TTD	16466986
DPYD	DPYD	Definite	DPYD	GIMERACIL	inhibitor	TdgClinicalTrial
DPYD	DPYD	Definite	DPYD	OXALIPLATIN		NCI	17127229
NGF	NGF	Definite	NGF	MEDI-578		TTD
NGF	NGF	Definite	NGF	TANEZUMAB	inhibitor	TdgClinicalTrial|ChemblInteractions|TTD
NGF	NGF	Definite	NGF	FASINUMAB	inhibitor	ChemblInteractions|TTD
NGF	NGF	Definite	NGF	METHADONE		PharmGKB	21358750|23651024
NGF	NGF	Definite	NGF	FULRANUMAB	inhibitor	ChemblInteractions
CA14	CA14	Definite	CA14	HISTIDINE	activator	GuideToPharmacology
CA14	CA14	Definite	CA14	ACETAZOLAMIDE	inhibitor	GuideToPharmacology	10592235
CA14	CA14	Definite	CA14	ETHOXZOLAMIDE	inhibitor	ChemblInteractions|GuideToPharmacology
CA14	CA14	Definite	CA14	METHAZOLAMIDE	inhibitor	GuideToPharmacology
CA14	CA14	Definite	CA14	CHLORTHALIDONE	inhibitor	GuideToPharmacology
CA14	CA14	Definite	CA14	SULFAMYLON		TTD
CA14	CA14	Definite	CA14	DORZOLAMIDE	inhibitor	GuideToPharmacology
CA14	CA14	Definite	CA14	PARABEN		TTD
CA14	CA14	Definite	CA14	CURCUMIN		TTD
CA14	CA14	Definite	CA14	PHENOL		TTD
CA14	CA14	Definite	CA14	BRINZOLAMIDE	inhibitor	GuideToPharmacology
CA14	CA14	Definite	CA14	TRIENTINE		TTD
APH1A	APH1A	Definite	APH1A	SEMAGACESTAT	inhibitor	DTC|ChemblInteractions	19443228
APH1A	APH1A	Definite	APH1A	IC261		DTC	20350806
APH1A	APH1A	Definite	APH1A	TARENFLURBIL	modulator	ChemblInteractions
APH1A	APH1A	Definite	APH1A	CHEMBL247471		TdgClinicalTrial
APH1A	APH1A	Definite	APH1A	BEGACESTAT	inhibitor	ChemblInteractions
APH1A	APH1A	Definite	APH1A	METHYLINOSITOL		TdgClinicalTrial
APH1A	APH1A	Definite	APH1A	AVAGACESTAT	inhibitor	TdgClinicalTrial|ChemblInteractions
APH1A	APH1A	Definite	APH1A	GSI-136		TdgClinicalTrial
APH1A	APH1A	Definite	APH1A	MK-0752		ClearityFoundationClinicalTrial
APH1A	APH1A	Definite	APH1A	CHEMBL392068		DTC	23181502|19443228
KCNN3	KCNN3	Definite	KCNN3	DEQUALINIUM	blocker	GuideToPharmacology|TTD
KCNN3	KCNN3	Definite	KCNN3	APAMIN	inhibitor	GuideToPharmacology
KCNN3	KCNN3	Definite	KCNN3	RILUZOLE	activator	GuideToPharmacology
KCNN3	KCNN3	Definite	KCNN3	TUBOCURARINE	blocker	GuideToPharmacology
GALNT2	GALNT2	Definite	GALNT2	ATENOLOL		PharmGKB
AKT3	AKT3	Definite	AKT3	UPROSERTIB	inhibitor	ChemblInteractions|CGI|GuideToPharmacology|TTD
AKT3	AKT3	Definite	AKT3	OMIPALISIB	inhibitor	MyCancerGenomeClinicalTrial
AKT3	AKT3	Definite	AKT3	MK-2206	inhibitor|allosteric modulator	TdgClinicalTrial|ClearityFoundationClinicalTrial|ChemblInteractions|GuideToPharmacology|MyCancerGenomeClinicalTrial|TTD
AKT3	AKT3	Definite	AKT3	VEMURAFENIB		CIViC	24265155
AKT3	AKT3	Definite	AKT3	XL-418	inhibitor	TdgClinicalTrial|ChemblInteractions|TTD	19644473
AKT3	AKT3	Definite	AKT3	PERIFOSINE		TdgClinicalTrial
AKT3	AKT3	Definite	AKT3	GSK-690693	inhibitor	ChemblInteractions|GuideToPharmacology|TTD
AKT3	AKT3	Definite	AKT3	TRICIRIBINE PHOSPHATE	inhibitor	ChemblInteractions
AKT3	AKT3	Definite	AKT3	MSC-2363318A	inhibitor	ChemblInteractions|TTD
AKT3	AKT3	Definite	AKT3	IPATASERTIB	inhibitor	TdgClinicalTrial|ClearityFoundationClinicalTrial|ChemblInteractions|GuideToPharmacology|MyCancerGenomeClinicalTrial
AKT3	AKT3	Definite	AKT3	ARCHEXIN		TdgClinicalTrial
AKT3	AKT3	Definite	AKT3	SR-13668		TTD
AKT3	AKT3	Definite	AKT3	EVEROLIMUS	inhibitor	MyCancerGenomeClinicalTrial
AKT3	AKT3	Definite	AKT3	AFURESERTIB	inhibitor	ChemblInteractions|GuideToPharmacology|TTD
AKT3	AKT3	Definite	AKT3	CAPIVASERTIB	inhibitor	ClearityFoundationClinicalTrial|CGI|GuideToPharmacology|TTD
AKT3	AKT3	Definite	AKT3	AZD-5363	inhibitor	ChemblInteractions
AKT3	AKT3	Definite	AKT3	GSK-269962A		DTC
AKT3	AKT3	Definite	AKT3	TRICIRIBINE		TdgClinicalTrial|ClearityFoundationClinicalTrial
AKT3	AKT3	Definite	AKT3	A-443654	inhibitor	GuideToPharmacology
AKT3	AKT3	Definite	AKT3	MIRANSERTIB	allosteric modulator|inhibitor	ChemblInteractions|GuideToPharmacology
AKT3	AKT3	Definite	AKT3	LY-2780301	inhibitor	ChemblInteractions
AKT3	AKT3	Definite	AKT3	FASUDIL		DTC
AKT3	AKT3	Definite	AKT3	MK-2201	inhibitor	ChemblInteractions
PRKD3	PRKD3	Definite	PRKD3	CENISERTIB		DTC
PRKD3	PRKD3	Definite	PRKD3	SOTRASTAURIN	inhibitor	ChemblInteractions
PRKD3	PRKD3	Definite	PRKD3	GEFITINIB		DTC
PRKD3	PRKD3	Definite	PRKD3	BMS-387032		DTC
PRKD3	PRKD3	Definite	PRKD3	GW441756X		DTC
PRKD3	PRKD3	Definite	PRKD3	CHEMBL541400		DTC
PRKD3	PRKD3	Definite	PRKD3	R-1487		DTC
PRKD3	PRKD3	Definite	PRKD3	R-406		DTC
PRKD3	PRKD3	Definite	PRKD3	JNJ-7706621		DTC
PRKD3	PRKD3	Definite	PRKD3	DOVITINIB		DTC
PRKD3	PRKD3	Definite	PRKD3	PF-00562271		DTC
PRKD3	PRKD3	Definite	PRKD3	ILORASERTIB		DTC
PRKD3	PRKD3	Definite	PRKD3	BRYOSTATIN		TdgClinicalTrial
PRKD3	PRKD3	Definite	PRKD3	ADAVOSERTIB		DTC
PRKD3	PRKD3	Definite	PRKD3	GATIFLOXACIN		DTC
PRKD3	PRKD3	Definite	PRKD3	UCN-01	inhibitor	ChemblInteractions
PRKD3	PRKD3	Definite	PRKD3	PD-0166285		DTC
PRKD3	PRKD3	Definite	PRKD3	GSK-690693	inhibitor	ChemblInteractions
PRKD3	PRKD3	Definite	PRKD3	QUERCETIN	inhibitor	MyCancerGenome
PRKD3	PRKD3	Definite	PRKD3	SB-242235		DTC
PRKD3	PRKD3	Definite	PRKD3	CYC-116		DTC
PRKD3	PRKD3	Definite	PRKD3	VX-702		DTC
PRKD3	PRKD3	Definite	PRKD3	TAE-684		DTC
PRKD3	PRKD3	Definite	PRKD3	SB-220025		DTC
PRKD3	PRKD3	Definite	PRKD3	PALBOCICLIB		DTC
PRKD3	PRKD3	Definite	PRKD3	SB-431542		DTC
PRKD3	PRKD3	Definite	PRKD3	CHEMBL225519		DTC
PRKD3	PRKD3	Definite	PRKD3	SP-600125		DTC
PRKD3	PRKD3	Definite	PRKD3	TAK-715		DTC
PRKD3	PRKD3	Definite	PRKD3	SB-202190		DTC
PRKD3	PRKD3	Definite	PRKD3	FASUDIL		DTC
PRKD3	PRKD3	Definite	PRKD3	CHEMBL1997335		DTC
PRKD3	PRKD3	Definite	PRKD3	GSK-269962A		DTC
PRKD3	PRKD3	Definite	PRKD3	MIDOSTAURIN	inhibitor	ChemblInteractions
PRKD3	PRKD3	Definite	PRKD3	BMS-345541		DTC
PRKD3	PRKD3	Definite	PRKD3	CHEMBL365617		DTC
PRKD3	PRKD3	Definite	PRKD3	CEP-2563	inhibitor	ChemblInteractions
SF3B1	SF3B1	Definite	SF3B1	E7107		JAX-CKB	27622333
HSPD1	HSPD1	Definite	HSPD1	CETRORELIX		NCI	9805247
HSPD1	HSPD1	Definite	HSPD1	DIAPEP-277		TTD
HSPD1	HSPD1	Definite	HSPD1	ATORVASTATIN		NCI	15678257
ERBB4	ERBB4	Definite	ERBB4	PALIPERIDONE		PharmGKB	25714000
ERBB4	ERBB4	Definite	ERBB4	PELITINIB	inhibitor	TALC|MyCancerGenome
ERBB4	ERBB4	Definite	ERBB4	ERLOTINIB		DTC|JAX-CKB|PharmGKB	27207775
ERBB4	ERBB4	Definite	ERBB4	AC-480	inhibitor	TALC|MyCancerGenome|TdgClinicalTrial|ChemblInteractions|GuideToPharmacology
ERBB4	ERBB4	Definite	ERBB4	AFATINIB	inhibitor	JAX-CKB|CGI	27207775
ERBB4	ERBB4	Definite	ERBB4	LAPATINIB		DTC|JAX-CKB|CGI|DoCM|CIViC|PharmGKB	25590338|19718025
ERBB4	ERBB4	Definite	ERBB4	ILORASERTIB		DTC
ERBB4	ERBB4	Definite	ERBB4	CETUXIMAB		JAX-CKB	27207775
ERBB4	ERBB4	Definite	ERBB4	JNJ-26483327	inhibitor	ChemblInteractions
ERBB4	ERBB4	Definite	ERBB4	AZD-1152-HQPA		DTC
ERBB4	ERBB4	Definite	ERBB4	IBRUTINIB	inhibitor	GuideToPharmacology
ERBB4	ERBB4	Definite	ERBB4	DACOMITINIB	inhibitor	TALC|MyCancerGenome|TdgClinicalTrial|ChemblInteractions|GuideToPharmacology|MyCancerGenomeClinicalTrial
ERBB4	ERBB4	Definite	ERBB4	CURCUMIN		DTC	25753330
ERBB4	ERBB4	Definite	ERBB4	LAUROGUADINE		DTC
ERBB4	ERBB4	Definite	ERBB4	SP-600125		DTC
ERBB4	ERBB4	Definite	ERBB4	TUCATINIB	inhibitor	GuideToPharmacology
ERBB4	ERBB4	Definite	ERBB4	ALLITINIB	inhibitor	GuideToPharmacology
ERBB4	ERBB4	Definite	ERBB4	GEFITINIB	inhibitor	DTC|MyCancerGenomeClinicalTrial|PharmGKB
ERBB4	ERBB4	Definite	ERBB4	METHYLCURCUMIN		DTC	25753330
ERBB4	ERBB4	Definite	ERBB4	R-406		DTC
ERBB4	ERBB4	Definite	ERBB4	DIMETHYLCURCUMIN		DTC	25753330
ERBB4	ERBB4	Definite	ERBB4	AEE-788	inhibitor	GuideToPharmacology
ERBB4	ERBB4	Definite	ERBB4	POZIOTINIB	inhibitor	ChemblInteractions|GuideToPharmacology|MyCancerGenomeClinicalTrial
ERBB4	ERBB4	Definite	ERBB4	SB-220025		DTC
ERBB4	ERBB4	Definite	ERBB4	BMS-690514	inhibitor	TALC|MyCancerGenome|ChemblInteractions
ERBB4	ERBB4	Definite	ERBB4	TAK-715		DTC
ERBB4	ERBB4	Definite	ERBB4	OSIMERTINIB MESYLATE	inhibitor	ChemblInteractions
ERBB4	ERBB4	Definite	ERBB4	AFATINIB DIMALEATE	inhibitor	ChemblInteractions
ERBB4	ERBB4	Definite	ERBB4	TAE-684		DTC
ERBB4	ERBB4	Definite	ERBB4	CENISERTIB		DTC
ERBB4	ERBB4	Definite	ERBB4	VANDETANIB	inhibitor	ChemblInteractions
ERBB4	ERBB4	Definite	ERBB4	DASATINIB		DTC
ERBB4	ERBB4	Definite	ERBB4	CHEMBL578061		DTC
ERBB4	ERBB4	Definite	ERBB4	CANERTINIB DIHYDROCHLORIDE	inhibitor	ChemblInteractions
ERBB4	ERBB4	Definite	ERBB4	RG-1530		DTC
ERBB4	ERBB4	Definite	ERBB4	ACALABRUTINIB	inhibitor	GuideToPharmacology
ERBB4	ERBB4	Definite	ERBB4	ALISERTIB		DTC
ERBB4	ERBB4	Definite	ERBB4	CEDIRANIB		DTC
KCNJ13	KCNJ13	Definite	KCNJ13	DALFAMPRIDINE	blocker	GuideToPharmacology
THRB	THRB	Definite	THRB	MB07811	agonist	TdgClinicalTrial|ChemblInteractions|TTD	10592235
THRB	THRB	Definite	THRB	DEXTROTHYROXINE	agonist	ChemblInteractions|GuideToPharmacology	17315033|10592235|17139284|16099238|12776178|17016423|12668276
THRB	THRB	Definite	THRB	LEVOTHYROXINE	agonist	DTC|TdgClinicalTrial|TEND	20151830|16053391|18816177|17016423|20051527
THRB	THRB	Definite	THRB	CHEMBL297304		DTC
THRB	THRB	Definite	THRB	CHEMBL1397308		DTC
THRB	THRB	Definite	THRB	ERYTHROSINE		DTC
THRB	THRB	Definite	THRB	ROSE BENGAL		DTC
THRB	THRB	Definite	THRB	PROTOPORPHYRIN		DTC
THRB	THRB	Definite	THRB	CHEMBL581044		DTC
THRB	THRB	Definite	THRB	3-METHYLCHOLANTHRENE		DTC
THRB	THRB	Definite	THRB	WEDELOLACTONE		DTC
THRB	THRB	Definite	THRB	SHIKONIN		DTC
THRB	THRB	Definite	THRB	TIRATRICOL	agonist	GuideToPharmacology|TTD	17139284|17016423
THRB	THRB	Definite	THRB	AMMONIA SOLUTION, STRONG		DTC	22324546
THRB	THRB	Definite	THRB	HYPERICIN		DTC
THRB	THRB	Definite	THRB	DOXORUBICIN HYDROCHLORIDE		DTC
THRB	THRB	Definite	THRB	SOBETIROME	agonist	TdgClinicalTrial|GuideToPharmacology	10592235
THRB	THRB	Definite	THRB	PRIMAQUINE PHOSPHATE		DTC
THRB	THRB	Definite	THRB	TOLONIUM CHLORIDE		DTC
THRB	THRB	Definite	THRB	METHYLTHIONINIUM CHLORIDE		DTC
THRB	THRB	Definite	THRB	LIOTHYRONINE	agonist	TdgClinicalTrial|ChemblInteractions|TEND	17315033|10592235|17139284|16099238|12776178|17016423|12668276|11159893
THRB	THRB	Definite	THRB	DEXTROTHYROXINE SODIUM	agonist	ChemblInteractions
THRB	THRB	Definite	THRB	CHEMBL602969		DTC
THRB	THRB	Definite	THRB	ORTHO-PHTHALALDEHYDE		DTC
THRB	THRB	Definite	THRB	ZIRAM		DTC
THRB	THRB	Definite	THRB	DAUNORUBICIN		DTC
THRB	THRB	Definite	THRB	ISOTRETINOIN		DTC
THRB	THRB	Definite	THRB	RHAMNETIN		DTC
THRB	THRB	Definite	THRB	OXYTETRACYCLINE		DTC
THRB	THRB	Definite	THRB	LIOTHYRONINE SODIUM	agonist	ChemblInteractions|GuideToPharmacology
THRB	THRB	Definite	THRB	EPROTIROME	agonist	TdgClinicalTrial|ChemblInteractions	10592235
THRB	THRB	Definite	THRB	CHEMBL601952		DTC
THRB	THRB	Definite	THRB	CHEMBL426404		DTC
THRB	THRB	Definite	THRB	SLAZINIC ACID		DTC
THRB	THRB	Definite	THRB	CHEMBL1493528		DTC
THRB	THRB	Definite	THRB	DITHIAZANINE IODIDE		DTC
THRB	THRB	Definite	THRB	ROSMARINIC ACID		DTC
THRB	THRB	Definite	THRB	QUINALDINE BLUE		DTC
THRB	THRB	Definite	THRB	CHEMBL1341830		DTC
THRB	THRB	Definite	THRB	CIRAZOLINE		DTC
THRB	THRB	Definite	THRB	PYRACLOSTROBIN		DTC
THRB	THRB	Definite	THRB	METHYL PARATHIONE		DTC
THRB	THRB	Definite	THRB	QUININE		DTC
THRB	THRB	Definite	THRB	BENZO(K)FLUORANTHENE		DTC
THRB	THRB	Definite	THRB	DIENOCHLOR		DTC
THRB	THRB	Definite	THRB	RESMETIROM	agonist	TdgClinicalTrial|ChemblInteractions|TTD
THRB	THRB	Definite	THRB	DIPYRIDAMOLE		DTC
THRB	THRB	Definite	THRB	GOSSYPOL		DTC
THRB	THRB	Definite	THRB	CHEMBL584508		DTC
THRB	THRB	Definite	THRB	METHYLENE BLUE		DTC
THRB	THRB	Definite	THRB	WORTMANNIN		DTC
THRB	THRB	Definite	THRB	CHEMBL1465049		DTC
THRB	THRB	Definite	THRB	TRIAMTERENE		DTC
THRB	THRB	Definite	THRB	AZORUBINE		DTC
THRB	THRB	Definite	THRB	CHEMBL578741		DTC
THRB	THRB	Definite	THRB	QUINALIZARIN		DTC
THRB	THRB	Definite	THRB	LEVOTHYROXINE SODIUM	agonist	ChemblInteractions|GuideToPharmacology
THRB	THRB	Definite	THRB	3R14S-OCHRATOXIN A		DTC
THRB	THRB	Definite	THRB	CLOSANTEL		DTC
THRB	THRB	Definite	THRB	CHEMBL429095		DTC
THRB	THRB	Definite	THRB	DEPHOSTATIN		DTC
THRB	THRB	Definite	THRB	FUMARPROTOCETRARIC ACID		DTC
THRB	THRB	Definite	THRB	CHEMBL592124		DTC
THRB	THRB	Definite	THRB	BENZO[B]FLUORANTHENE		DTC
THRB	THRB	Definite	THRB	CHEMBL211670		DTC
THRB	THRB	Definite	THRB	QUINPIROLE		DTC
THRB	THRB	Definite	THRB	4-METHOXYCINNAMIC ACID		DTC
THRB	THRB	Definite	THRB	CHEMBL87568		DTC
THRB	THRB	Definite	THRB	AXITIROME		TTD	23667826
THRB	THRB	Definite	THRB	CHLOROPHENYLPIPERAZINE		DTC
THRB	THRB	Definite	THRB	CHEMBL577415		DTC
THRB	THRB	Definite	THRB	OXYCARBOXIN		DTC
THRB	THRB	Definite	THRB	SPIRONOLACTONE		DTC
THRB	THRB	Definite	THRB	TETRAIDOFLUORESCEIN		DTC
THRB	THRB	Definite	THRB	HOMIDIUM BROMIDE		DTC
THRB	THRB	Definite	THRB	INAMRINONE		DTC
THRB	THRB	Definite	THRB	METHYLENE BLUE		DTC
THRB	THRB	Definite	THRB	CHEMBL1451216		DTC
THRB	THRB	Definite	THRB	CHEMBL533293		DTC
THRB	THRB	Definite	THRB	ANAZOLENE		DTC
THRB	THRB	Definite	THRB	CARUBICIN		DTC
THRB	THRB	Definite	THRB	PICEATANNOL		DTC
THRB	THRB	Definite	THRB	DIBENZ[A,H]ANTHRACENE		DTC
THRB	THRB	Definite	THRB	IDARUBICIN		DTC
THRB	THRB	Definite	THRB	HOMIDIUM		DTC
THRB	THRB	Definite	THRB	ACID BLUE 129		DTC
THRB	THRB	Definite	THRB	DYCLONINE HYDROCHLORIDE		DTC
THRB	THRB	Definite	THRB	BAICALEIN		DTC
THRB	THRB	Definite	THRB	CHEMBL603024		DTC
THRB	THRB	Definite	THRB	JUGLONE		DTC
THRB	THRB	Definite	THRB	METHACYCLINE HYDROCHLORIDE		DTC
THRB	THRB	Definite	THRB	DACTINOMYCIN		DTC
THRB	THRB	Definite	THRB	DAUNORUBICIN HYDROCHLORIDE		DTC
THRB	THRB	Definite	THRB	GENTIAN VIOLET		DTC
THRB	THRB	Definite	THRB	HEXACHLOROPHENE		DTC
THRB	THRB	Definite	THRB	LOMOFUNGIN		DTC
THRB	THRB	Definite	THRB	OXIDOPAMINE		DTC
THRB	THRB	Definite	THRB	CHLOROTHALONIL		DTC
TLR9	TLR9	Definite	TLR9	AGATOLIMOD	inhibitor|agonist	TALC|TdgClinicalTrial|GuideToPharmacology
TLR9	TLR9	Definite	TLR9	LITENIMOD		TTD
TLR9	TLR9	Definite	TLR9	CHLOROQUINE	inhibitor	DTC	19949061|14579285|15762869|15307186|16849519|16148144
TLR9	TLR9	Definite	TLR9	CHEMBL1520346		DTC
TLR9	TLR9	Definite	TLR9	DEMETHOXYCURCUMIN		DTC
TLR9	TLR9	Definite	TLR9	HYDROXYCHLOROQUINE SULFATE	antagonist	ChemblInteractions
TLR9	TLR9	Definite	TLR9	HYDROXYCHLOROQUINE	antagonist	TdgClinicalTrial|GuideToPharmacology	14579285|18220957
TLR9	TLR9	Definite	TLR9	CHEMBL505670		DTC
TLR9	TLR9	Definite	TLR9	THIMEROSAL		DTC
TLR9	TLR9	Definite	TLR9	EMD-1201081		TTD
TLR9	TLR9	Definite	TLR9	CHEMBL429095		DTC
TLR9	TLR9	Definite	TLR9	GNKG-168		TTD
TLR9	TLR9	Definite	TLR9	ALEXIDINE HYDROCHLORIDE		DTC
TLR9	TLR9	Definite	TLR9	AGATOLIMOD SODIUM	agonist	ChemblInteractions
TLR9	TLR9	Definite	TLR9	TILSOTOLIMOD		TTD
TLR9	TLR9	Definite	TLR9	LEFITOLIMOD		TTD
PBRM1	PBRM1	Definite	PBRM1	ALPRAZOLAM		DTC	22137933
PBRM1	PBRM1	Definite	PBRM1	EVEROLIMUS		CGI|CIViC	27751729
PBRM1	PBRM1	Definite	PBRM1	TRIAZOLAM		DTC	22137933
PBRM1	PBRM1	Definite	PBRM1	IPILIMUMAB		CIViC	29301960
PBRM1	PBRM1	Definite	PBRM1	PEMBROLIZUMAB		CIViC	29301960
PBRM1	PBRM1	Definite	PBRM1	NIVOLUMAB		CIViC	29301960|31486842
PBRM1	PBRM1	Definite	PBRM1	SUNITINIB		CIViC	27751729
PBRM1	PBRM1	Definite	PBRM1	DURVALUMAB		CIViC	29301960
PBRM1	PBRM1	Definite	PBRM1	ATEZOLIZUMAB		CIViC	29301960
GNL3	GNL3	Definite	GNL3	CYCLOPHOSPHAMIDE		PharmGKB
GNL3	GNL3	Definite	GNL3	EPIRUBICIN		PharmGKB
GNL3	GNL3	Definite	GNL3	FLUOROURACIL		PharmGKB
NEK4	NEK4	Definite	NEK4	R-406		DTC
NEK4	NEK4	Definite	NEK4	DOVITINIB		DTC
NEK4	NEK4	Definite	NEK4	CHEMBL541400		DTC
NEK4	NEK4	Definite	NEK4	GW441756X		DTC
NEK4	NEK4	Definite	NEK4	TAE-684		DTC
NEK4	NEK4	Definite	NEK4	SNS-314		DTC
NEK4	NEK4	Definite	NEK4	CENISERTIB		DTC
NEK4	NEK4	Definite	NEK4	CYC-116		DTC
NEK4	NEK4	Definite	NEK4	CHEMBL225519		DTC
NEK4	NEK4	Definite	NEK4	SP-600125		DTC
NEK4	NEK4	Definite	NEK4	ILORASERTIB		DTC
ITIH3	ITIH3	Definite	ITIH3	CLOZAPINE		PharmGKB	27396837
FHIT	FHIT	Definite	FHIT	FRUCTOSE		TTD	17139284|17016423
PSMD6	PSMD6	Definite	PSMD6	CARFILZOMIB	inhibitor	DTC|MyCancerGenome|ChemblInteractions	24524217
PSMD6	PSMD6	Definite	PSMD6	BORTEZOMIB	inhibitor	DTC|MyCancerGenome|ChemblInteractions	24524217
PSMD6	PSMD6	Definite	PSMD6	IXAZOMIB CITRATE	inhibitor	ChemblInteractions
PSMD6	PSMD6	Definite	PSMD6	OPROZOMIB	inhibitor	ChemblInteractions
EPHA5	EPHA5	Definite	EPHA5	VANDETANIB	inhibitor	ChemblInteractions
EPHA5	EPHA5	Definite	EPHA5	HESPERADIN	inhibitor	DTC	19035792
EPHA5	EPHA5	Definite	EPHA5	PACLITAXEL		PharmGKB	26133776|22843789|26763541|26133777
CLCN3	CLCN3	Definite	CLCN3	PHLORETIN	blocker	GuideToPharmacology
CLCN3	CLCN3	Definite	CLCN3	DESACETYLBUFOTALIN		DTC	23799775
CLCN3	CLCN3	Definite	CLCN3	CINOBUFAGIN		DTC	23799775
CLCN3	CLCN3	Definite	CLCN3	BUFALIN		DTC	23799775
HCN1	HCN1	Definite	HCN1	TRAMADOL		PharmGKB	30971809
HCN1	HCN1	Definite	HCN1	ZATEBRADINE	blocker	GuideToPharmacology
HCN1	HCN1	Definite	HCN1	IVABRADINE	blocker	GuideToPharmacology
HCN1	HCN1	Definite	HCN1	CILOBRADINE	blocker	GuideToPharmacology
PDE4D	PDE4D	Definite	PDE4D	DIPYRIDAMOLE	inhibitor	ChemblInteractions
PDE4D	PDE4D	Definite	PDE4D	ROLIPRAM	inhibitor	GuideToPharmacology|TTD	10592235|17139284|17016423
PDE4D	PDE4D	Definite	PDE4D	LIRIMILAST		TTD
PDE4D	PDE4D	Definite	PDE4D	AMINOPHYLLINE	inhibitor	ChemblInteractions
PDE4D	PDE4D	Definite	PDE4D	CRISABOROLE	inhibitor	ChemblInteractions	22841723
PDE4D	PDE4D	Definite	PDE4D	ROFLUMILAST	inhibitor	ChemblInteractions	17726343|10592235
PDE4D	PDE4D	Definite	PDE4D	PAPAVERINE		TTD
PDE4D	PDE4D	Definite	PDE4D	HT-0712		TTD
PDE4D	PDE4D	Definite	PDE4D	DYPHYLLINE	inhibitor	TdgClinicalTrial|ChemblInteractions|TEND	7925603|17139284|17016423
PDE4D	PDE4D	Definite	PDE4D	REVAMILAST		TTD
PDE4D	PDE4D	Definite	PDE4D	THEOPHYLLINE SODIUM GLYCINATE	inhibitor	ChemblInteractions
PDE4D	PDE4D	Definite	PDE4D	DENBUFYLLINE		TTD
PDE4D	PDE4D	Definite	PDE4D	OGLEMILAST		TTD	18660832
PDE4D	PDE4D	Definite	PDE4D	DIFAMILAST	inhibitor	GuideToPharmacology
PDE4D	PDE4D	Definite	PDE4D	BPN-14770	allosteric modulator	GuideToPharmacology|TTD
PDE4D	PDE4D	Definite	PDE4D	PENTOXIFYLLINE	inhibitor	ChemblInteractions
PDE4D	PDE4D	Definite	PDE4D	CDC-801		TTD
PDE4D	PDE4D	Definite	PDE4D	PICLAMILAST		TTD	10592235|15765929
PDE4D	PDE4D	Definite	PDE4D	APREMILAST	inhibitor|antagonist	ChemblInteractions|GuideToPharmacology	25864487|17352685
PDE4D	PDE4D	Definite	PDE4D	OXTRIPHYLLINE	inhibitor	ChemblInteractions
PDE4D	PDE4D	Definite	PDE4D	RESVERATROL		TdgClinicalTrial
PDE4D	PDE4D	Definite	PDE4D	GSK-356278		TTD
PDE4D	PDE4D	Definite	PDE4D	MK-0873		TTD
PDE4D	PDE4D	Definite	PDE4D	TOFIMILAST		TTD
PDE4D	PDE4D	Definite	PDE4D	FLAVOXATE HYDROCHLORIDE	inhibitor	ChemblInteractions
PDE4D	PDE4D	Definite	PDE4D	QUETIAPINE		PharmGKB
PDE4D	PDE4D	Definite	PDE4D	ETAZOLATE		TdgClinicalTrial
PDE4D	PDE4D	Definite	PDE4D	AMLEXANOX	inhibitor	ChemblInteractions
PDE4D	PDE4D	Definite	PDE4D	THEOPHYLLINE	inhibitor	ChemblInteractions
PDE4D	PDE4D	Definite	PDE4D	CDP840	inhibitor	GuideToPharmacology
SLCO4C1	SLCO4C1	Definite	SLCO4C1	DIGOXIN		TTD
HSPA9	HSPA9	Definite	HSPA9	CHEMBL33859		NCI|TTD	11156371
NDUFA2	NDUFA2	Definite	NDUFA2	NV-128	inhibitor	ChemblInteractions
NDUFA2	NDUFA2	Definite	NDUFA2	ME-344	inhibitor	ChemblInteractions
NDUFA2	NDUFA2	Definite	NDUFA2	METFORMIN HYDROCHLORIDE	inhibitor	ChemblInteractions
HFE	HFE	Definite	HFE	ADALIMUMAB		PharmGKB	27115882
HLA-A	HLA-A	Definite	HLA-A	TERBINAFINE		PharmGKB
HLA-A	HLA-A	Definite	HLA-A	ZONISAMIDE		PharmGKB	24236482
HLA-A	HLA-A	Definite	HLA-A	TICLOPIDINE		PharmGKB	17339877
HLA-A	HLA-A	Definite	HLA-A	CARBAMAZEPINE		FDA
HLA-A	HLA-A	Definite	HLA-A	RIBAVIRIN		PharmGKB	23360626
HLA-A	HLA-A	Definite	HLA-A	VANCOMYCIN		PharmGKB	32439433
HLA-A	HLA-A	Definite	HLA-A	LEVETIRACETAM		PharmGKB	30020991
HLA-A	HLA-A	Definite	HLA-A	SERTRALINE		PharmGKB
HLA-A	HLA-A	Definite	HLA-A	FENOFIBRATE		PharmGKB
HLA-A	HLA-A	Definite	HLA-A	CLAVULANIC ACID		PharmGKB
HLA-A	HLA-A	Definite	HLA-A	DAPSONE		PharmGKB	29233746
HLA-A	HLA-A	Definite	HLA-A	IPILIMUMAB		PharmGKB|FDA
HLA-A	HLA-A	Definite	HLA-A	AMPICILLIN		PharmGKB	9609616
HLA-A	HLA-A	Definite	HLA-A	BACAMPICILLIN		PharmGKB	9609616
HLA-A	HLA-A	Definite	HLA-A	AMOXICILLIN		PharmGKB	9609616
ATAT1	ATAT1	Definite	ATAT1	GEMCITABINE		PharmGKB	31616045
ATAT1	ATAT1	Definite	ATAT1	CARBOPLATIN		PharmGKB	31616045
TUBB	TUBB	Definite	TUBB	PACLITAXEL	inhibitor	DTC|ChemblInteractions|GuideToPharmacology|TTD	23631389|25369367|25768699|24457094|22595423|23313639|17887662|23387901|19758808|23725535|24953821
TUBB	TUBB	Definite	TUBB	NOCODAZOLE		DTC	21194809|25815147|25369367|25262051|23313639
TUBB	TUBB	Definite	TUBB	CABAZITAXEL	inhibitor	ChemblInteractions|GuideToPharmacology
TUBB	TUBB	Definite	TUBB	VINBLASTINE	adduct|inhibitor	DTC|GuideToPharmacology	9664292|23708010|1818332|18220533|15579115|23916255|14619954
TUBB	TUBB	Definite	TUBB	INDIBULIN	inhibitor	ChemblInteractions
TUBB	TUBB	Definite	TUBB	VORINOSTAT		DTC	20491440
TUBB	TUBB	Definite	TUBB	ROSABULIN		TTD
TUBB	TUBB	Definite	TUBB	IXABEPILONE	inhibitor	ChemblInteractions|GuideToPharmacology
TUBB	TUBB	Definite	TUBB	VINORELBINE	antagonist|inhibitor	DTC	25768699|20403547|7740336|17139284|17016423|9515574
TUBB	TUBB	Definite	TUBB	FOSBRETABULIN DISODIUM	inhibitor	ChemblInteractions
TUBB	TUBB	Definite	TUBB	FOSBRETABULIN TROMETHAMINE		ChemblInteractions
TUBB	TUBB	Definite	TUBB	VINCRISTINE	inhibitor	DTC|GuideToPharmacology|TTD	16539377|19277662|17139284|21664138|23916255|17016423|20442307
TUBB	TUBB	Definite	TUBB	VERUBULIN		ChemblInteractions|TTD
TUBB	TUBB	Definite	TUBB	LISAVANBULIN		TTD
TUBB	TUBB	Definite	TUBB	PACLITAXEL POLIGLUMEX		ChemblInteractions
TUBB	TUBB	Definite	TUBB	BRENTUXIMAB VEDOTIN	inhibitor	ChemblInteractions
TUBB	TUBB	Definite	TUBB	VINFLUNINE	inhibitor	ChemblInteractions	8663038|28042310|19455242
TUBB	TUBB	Definite	TUBB	COLCHICINE	binder|inhibitor	DTC|ChemblInteractions|GuideToPharmacology	23750455|20814887|25805446|22814904|25151572|24502232|20586571|25061803|25937236|16166440|24773591|19527023|25938266|15720245
TUBB	TUBB	Definite	TUBB	LEXIBULIN	inhibitor	ChemblInteractions
TUBB	TUBB	Definite	TUBB	MAYTANSINE		DTC	563462
TUBB	TUBB	Definite	TUBB	CHEMBL2036119		DTC	22543234
TUBB	TUBB	Definite	TUBB	ZAMPANOLIDE		DTC	19877653
TUBB	TUBB	Definite	TUBB	VINBLASTINE SULFATE	inhibitor	ChemblInteractions
TUBB	TUBB	Definite	TUBB	DAVUNETIDE		ChemblInteractions
TUBB	TUBB	Definite	TUBB	CHEMBL2036124		DTC	22543234
TUBB	TUBB	Definite	TUBB	COMBRETASTATIN A4		DTC	23631389|16913727|22543234|25584687|24669888|17765552|25192811
TUBB	TUBB	Definite	TUBB	CROLIBULIN	inhibitor	ChemblInteractions
TUBB	TUBB	Definite	TUBB	LARGAZOLE		DTC	20491440
TUBB	TUBB	Definite	TUBB	PODOFILOX	inhibitor	DTC	17765552|2011590|24953821|21402478
TUBB	TUBB	Definite	TUBB	VINORELBINE TARTRATE	inhibitor	ChemblInteractions
TUBB	TUBB	Definite	TUBB	PLINABULIN	inhibitor	ChemblInteractions|TTD
TUBB	TUBB	Definite	TUBB	TRASTUZUMAB EMTANSINE	inhibitor	ChemblInteractions
TUBB	TUBB	Definite	TUBB	CHEMBL453818		DTC	12141877
TUBB	TUBB	Definite	TUBB	MAYTANSINOL		DTC	563462
TUBB	TUBB	Definite	TUBB	DOCETAXEL	inhibitor	ChemblInteractions
TUBB	TUBB	Definite	TUBB	SIMOTAXEL		TTD
TUBB	TUBB	Definite	TUBB	MEBENDAZOLE		TTD
TUBB	TUBB	Definite	TUBB	DOLASTATIN-10		TTD
TUBB	TUBB	Definite	TUBB	PHOMOPSIN A		DTC	19072542
TUBB	TUBB	Definite	TUBB	BATABULIN		TTD
TUBB	TUBB	Definite	TUBB	VINDESINE		TTD
TUBB	TUBB	Definite	TUBB	ERIBULIN	inhibitor	GuideToPharmacology
TUBB	TUBB	Definite	TUBB	CHEMBL1795737		DTC	21664138
TUBB	TUBB	Definite	TUBB	VINCRISTINE SULFATE	inhibitor	ChemblInteractions
TUBB	TUBB	Definite	TUBB	CHEMBL1935538		DTC	22435708
TUBB	TUBB	Definite	TUBB	ERIBULIN MESYLATE	inhibitor	ChemblInteractions
TUBB	TUBB	Definite	TUBB	CYCLOSTREPTIN		DTC	17206139
TUBB	TUBB	Definite	TUBB	ZD-6126		TTD
TUBB	TUBB	Definite	TUBB	CURCUMIN		DTC	23830698
TUBB	TUBB	Definite	TUBB	DOCETAXEL	inhibitor	GuideToPharmacology
TUBB	TUBB	Definite	TUBB	SAGOPILONE		ChemblInteractions
TUBB	TUBB	Definite	TUBB	ABT-751		DTC|TTD	25468039
TUBB	TUBB	Definite	TUBB	ALBENDAZOLE		TTD
DDR1	DDR1	Definite	DDR1	MERESTINIB	inhibitor	GuideToPharmacology
DDR1	DDR1	Definite	DDR1	NILOTINIB	inhibitor	GuideToPharmacology
DDR1	DDR1	Definite	DDR1	IMATINIB	inhibitor|antagonist	TdgClinicalTrial|TEND|GuideToPharmacology	16298518|15972446|15994946|16168515|16401709
DPCR1	MUCL3	Definite	MUCL3	GEMCITABINE		PharmGKB	31616045
DPCR1	MUCL3	Definite	MUCL3	CARBOPLATIN		PharmGKB	31616045
C6ORF15	C6ORF15	Definite	C6ORF15	GEMCITABINE		PharmGKB	31616045
C6ORF15	C6ORF15	Definite	C6ORF15	CARBOPLATIN		PharmGKB	31616045
PSORS1C1	PSORS1C1	Definite	PSORS1C1	CARBOPLATIN		PharmGKB	31616045
PSORS1C1	PSORS1C1	Definite	PSORS1C1	ETANERCEPT		PharmGKB
PSORS1C1	PSORS1C1	Definite	PSORS1C1	GEMCITABINE		PharmGKB	31616045
PSORS1C1	PSORS1C1	Definite	PSORS1C1	ALLOPURINOL		PharmGKB	21801394|29193002
CDSN	CDSN	Definite	CDSN	CARBOPLATIN		PharmGKB	31616045
CDSN	CDSN	Definite	CDSN	GEMCITABINE		PharmGKB	31616045
CCHCR1	CCHCR1	Definite	CCHCR1	NEVIRAPINE		PharmGKB	21810746
TCF19	TCF19	Definite	TCF19	NEVIRAPINE		PharmGKB	21810746
POU5F1	POU5F1	Definite	POU5F1	PHENYTOIN		PharmGKB
POU5F1	POU5F1	Definite	POU5F1	ALCOHOL		NCI	16112835
POU5F1	POU5F1	Definite	POU5F1	ALLOPURINOL		PharmGKB	21801394
POU5F1	POU5F1	Definite	POU5F1	CARBAMAZEPINE		PharmGKB
HLA-C	HLA-C	Definite	HLA-C	FLOXACILLIN		PharmGKB	30664875
HLA-C	HLA-C	Definite	HLA-C	CLAVULANIC ACID		PharmGKB	30664875
HLA-C	HLA-C	Definite	HLA-C	AMOXICILLIN		PharmGKB	30664875
HLA-C	HLA-C	Definite	HLA-C	METHOTREXATE		PharmGKB	28444425
HLA-C	HLA-C	Definite	HLA-C	RIBAVIRIN		PharmGKB
HLA-C	HLA-C	Definite	HLA-C	USTEKINUMAB		PharmGKB	23521149
HLA-C	HLA-C	Definite	HLA-C	CLOZAPINE		PharmGKB	11266078
HLA-C	HLA-C	Definite	HLA-C	METHAZOLAMIDE		PharmGKB	30242287|20504258|25918017
HLA-C	HLA-C	Definite	HLA-C	LAMOTRIGINE		PharmGKB	19668019
HLA-C	HLA-C	Definite	HLA-C	CARBOPLATIN		PharmGKB	31616045
HLA-C	HLA-C	Definite	HLA-C	TICLOPIDINE		PharmGKB	17339877
HLA-C	HLA-C	Definite	HLA-C	GEMCITABINE		PharmGKB	31616045
HLA-B	HLA-B	Definite	HLA-B	PAZOPANIB		PharmGKB|FDA	26546620
HLA-B	HLA-B	Definite	HLA-B	MINOCYCLINE		PharmGKB
HLA-B	HLA-B	Definite	HLA-B	DAPSONE		PharmGKB	28885988|23604100|24152261|29512326|29458119
HLA-B	HLA-B	Definite	HLA-B	BCG VACCINE		NCI	17028812
HLA-B	HLA-B	Definite	HLA-B	TICLOPIDINE		PharmGKB	17339877
HLA-B	HLA-B	Definite	HLA-B	CLOZAPINE		PharmGKB	9587740|26876947|2222133
HLA-B	HLA-B	Definite	HLA-B	RIBAVIRIN		PharmGKB	23360626|12873589
HLA-B	HLA-B	Definite	HLA-B	CARBAMAZEPINE		NCI|FDA	16981842
HLA-B	HLA-B	Definite	HLA-B	PHENYTOIN		FDA
HLA-B	HLA-B	Definite	HLA-B	FOSPHENYTOIN		PharmGKB|FDA
HLA-B	HLA-B	Definite	HLA-B	STAVUDINE		PharmGKB
HLA-B	HLA-B	Definite	HLA-B	ABACAVIR		FDA	19629158
HLA-B	HLA-B	Definite	HLA-B	METHIMAZOLE		PharmGKB	26599303|26151496
HLA-B	HLA-B	Definite	HLA-B	OXCARBAZEPINE		FDA
HLA-B	HLA-B	Definite	HLA-B	CARBIMAZOLE		PharmGKB	26599303|26151496
HLA-B	HLA-B	Definite	HLA-B	CLAVULANIC ACID		PharmGKB	30664875
HLA-B	HLA-B	Definite	HLA-B	ACETAZOLAMIDE		PharmGKB	21342230
HLA-B	HLA-B	Definite	HLA-B	THALIDOMIDE		NCI	7876469
HLA-B	HLA-B	Definite	HLA-B	AMOXICILLIN		PharmGKB	30664875
HLA-B	HLA-B	Definite	HLA-B	FLOXACILLIN		PharmGKB	23596311|23132554|24731753|18637831|23291545|19696695|23032409|18256392|19483685|30664875
HLA-B	HLA-B	Definite	HLA-B	SULFASALAZINE		PharmGKB	25303297
HLA-B	HLA-B	Definite	HLA-B	METHAZOLAMIDE		PharmGKB	30242287|25970075|9109770|20504258|25918017
HLA-B	HLA-B	Definite	HLA-B	LAMIVUDINE		PharmGKB
HLA-B	HLA-B	Definite	HLA-B	CLINDAMYCIN		PharmGKB	27527109
HLA-B	HLA-B	Definite	HLA-B	TRICHLOROETHYLENE		PharmGKB
MICB	MICB	Definite	MICB	RIBAVIRIN		PharmGKB
LTA	LTA	Definite	LTA	CARBAMAZEPINE		PharmGKB	11294926
LTA	LTA	Definite	LTA	BAMINERCEPT	inhibitor	TdgClinicalTrial|ChemblInteractions
LTA	LTA	Definite	LTA	PATECLIZUMAB	inhibitor	ChemblInteractions
LTA	LTA	Definite	LTA	ABACAVIR		PharmGKB
TNF	TNF	Definite	TNF	HYDROXYCHLOROQUINE		NCI	9002011
TNF	TNF	Definite	TNF	MIDAZOLAM		NCI	16406030
TNF	TNF	Definite	TNF	RIFAMPIN		PharmGKB	22151084
TNF	TNF	Definite	TNF	AFELIMOMAB	inhibitor	ChemblInteractions	10829362
TNF	TNF	Definite	TNF	INFLIXIMAB	inhibitor	TdgClinicalTrial|ChemblInteractions|TEND|PharmGKB|TTD	16720636|16909270|23057546|16456024|26244882|12847678|18050183|18713756|19365401|22760475|16052578|24192118|12110154|17343250|22960943|15481318|15691299|15674127|15804598|22129793|11752352|25311255|12190096|18438841|15691217|17673491|15695296|17642244|16622728
TNF	TNF	Definite	TNF	CEFOTAXIME		NCI	8354907|10989981
TNF	TNF	Definite	TNF	ONERCEPT	inhibitor	ChemblInteractions
TNF	TNF	Definite	TNF	PEGSUNERCEPT	inhibitor	ChemblInteractions|TTD
TNF	TNF	Definite	TNF	GEMCITABINE		PharmGKB	31616045
TNF	TNF	Definite	TNF	RISPERIDONE		NCI	15567770|11545247
TNF	TNF	Definite	TNF	ADALIMUMAB	antibody|inhibitor	TdgClinicalTrial|ChemblInteractions|TEND|PharmGKB|TTD	12044041|16720636|16909270|23057546|15022409|26244882|12847678|18050183|18713756|19365401|22760475|24192118|14532145|17343250|22960943|15046527|22129793|11752352|12190096|18438841|15200343
TNF	TNF	Definite	TNF	THALIDOMIDE	inhibitor	TdgClinicalTrial|TEND|TTD	8755512|12046682|12167383|12105857|12102294|11752352|12113124
TNF	TNF	Definite	TNF	AZ9773	inhibitor	ChemblInteractions
TNF	TNF	Definite	TNF	RABEPRAZOLE		NCI	16815316
TNF	TNF	Definite	TNF	ETANERCEPT	inhibitor|antibody	TdgClinicalTrial|ChemblInteractions|TEND|PharmGKB|TTD	16720636|16909270|23057546|26244882|12847678|18050183|18713756|19365401|22760475|24192118|17343250|22960943|10375846|10405518|10206649|22129793|11752352|12190096|10338381|18438841|10357816
TNF	TNF	Definite	TNF	METHIMAZOLE		NCI	8491516
TNF	TNF	Definite	TNF	CARBAMAZEPINE		NCI|PharmGKB	15565432|11294926
TNF	TNF	Definite	TNF	ABBV-257		TTD
TNF	TNF	Definite	TNF	VADIMEZAN	inducer	TALC
TNF	TNF	Definite	TNF	DIGOXIN		DTC
TNF	TNF	Definite	TNF	LACTULOSE		NCI	11226652
TNF	TNF	Definite	TNF	CERTOLIZUMAB PEGOL	inhibitor	ChemblInteractions
TNF	TNF	Definite	TNF	ATORVASTATIN		PharmGKB	18997459
TNF	TNF	Definite	TNF	LENALIDOMIDE		ClearityFoundationClinicalTrial|TTD
TNF	TNF	Definite	TNF	ENBREL		TTD
TNF	TNF	Definite	TNF	NERELIMOMAB	inhibitor	ChemblInteractions
TNF	TNF	Definite	TNF	PLACULUMAB	inhibitor	TdgClinicalTrial|ChemblInteractions|TTD
TNF	TNF	Definite	TNF	HOMIDIUM BROMIDE		DTC
TNF	TNF	Definite	TNF	METHYLENE BLUE		DTC
TNF	TNF	Definite	TNF	MEROPENEM		NCI	8354907
TNF	TNF	Definite	TNF	ETHAMBUTOL		PharmGKB	22151084
TNF	TNF	Definite	TNF	CERTOLIZUMAB		TTD
TNF	TNF	Definite	TNF	GOLIMUMAB	inhibitor|antibody	TdgClinicalTrial|ChemblInteractions|TEND|TTD	21079302
TNF	TNF	Definite	TNF	DERSALAZINE		TdgClinicalTrial
TNF	TNF	Definite	TNF	PYRAZINAMIDE		PharmGKB	22151084
TNF	TNF	Definite	TNF	GENTAMICIN		NCI	14565862
TNF	TNF	Definite	TNF	LENERCEPT	inhibitor	ChemblInteractions
TNF	TNF	Definite	TNF	ISONIAZID		PharmGKB	22151084
TNF	TNF	Definite	TNF	SOBLIDOTIN		NCI	11855751
TNF	TNF	Definite	TNF	PF-04236921		TdgClinicalTrial
TNF	TNF	Definite	TNF	OZORALIZUMAB	inhibitor	TdgClinicalTrial|ChemblInteractions
TNF	TNF	Definite	TNF	CELASTROL		TTD
TNF	TNF	Definite	TNF	CARBOPLATIN		PharmGKB	31616045
TNF	TNF	Definite	TNF	SORAFENIB		PharmGKB	22736425
TNF	TNF	Definite	TNF	BCG VACCINE		NCI	10022737
TNF	TNF	Definite	TNF	RUTIN		NCI	12423426
TNF	TNF	Definite	TNF	LAPACHONE		NCI	10075082
TNF	TNF	Definite	TNF	OMEPRAZOLE		NCI	16815316
TNF	TNF	Definite	TNF	BUPIVACAINE		NCI	15781526
TNF	TNF	Definite	TNF	INSULIN		NCI	16125526|9287059
TNF	TNF	Definite	TNF	PENTOXIFYLLINE		TTD
TNF	TNF	Definite	TNF	HALOFUGINONE		NCI	16769768
TNF	TNF	Definite	TNF	PROPYLTHIOURACIL		NCI	15119959
TNF	TNF	Definite	TNF	CYCLOSPORINE		PharmGKB	18444945
TNF	TNF	Definite	TNF	STAVUDINE		PharmGKB	20887379
TNF	TNF	Definite	TNF	REMTOLUMAB		TTD
TNF	TNF	Definite	TNF	PYRIDOXINE		NCI	16277693
TNF	TNF	Definite	TNF	MILTEFOSINE		NCI	7883777
TNF	TNF	Definite	TNF	ORTATAXEL		TTD
TNF	TNF	Definite	TNF	DIDANOSINE		NCI	9430255
TNF	TNF	Definite	TNF	AMPHOTERICIN B		DTC
TNF	TNF	Definite	TNF	SPIRONOLACTONE		NCI	16837769
TNF	TNF	Definite	TNF	LENABASUM		TTD
TNF	TNF	Definite	TNF	NAFAMOSTAT		TTD
TNF	TNF	Definite	TNF	BENZO[E]PYRENE		DTC
TNF	TNF	Definite	TNF	ALTEPLASE		NCI	8615653
TNF	TNF	Definite	TNF	GLIMEPIRIDE		NCI	14686960
TNF	TNF	Definite	TNF	5,7-DIHYDROXY-4-METHYLCOUMARIN		DTC
LST1	LST1	Definite	LST1	ABACAVIR		PharmGKB
PRRC2A	PRRC2A	Definite	PRRC2A	CARBAMAZEPINE		PharmGKB	16538176
PRRC2A	PRRC2A	Definite	PRRC2A	CARBOPLATIN		PharmGKB	31616045
PRRC2A	PRRC2A	Definite	PRRC2A	GEMCITABINE		PharmGKB	31616045
BAG6	BAG6	Definite	BAG6	CARBAMAZEPINE		PharmGKB	16538176
MSH5	MSH5	Definite	MSH5	GEMCITABINE		PharmGKB	31616045
MSH5	MSH5	Definite	MSH5	CARBOPLATIN		PharmGKB	31616045
HSPA1L	HSPA1L	Definite	HSPA1L	CARBAMAZEPINE		PharmGKB	16538175
HSPA1A	HSPA1A	Definite	HSPA1A	CARBAMAZEPINE		PharmGKB	16538175
SLC44A4	SLC44A4	Definite	SLC44A4	ASG-5ME		TTD
EHMT2	EHMT2	Definite	EHMT2	MEDRONIC ACID		DTC
EHMT2	EHMT2	Definite	EHMT2	TELMISARTAN		DTC
EHMT2	EHMT2	Definite	EHMT2	LISINOPRIL HYDRATE		DTC
EHMT2	EHMT2	Definite	EHMT2	CHEMBL591628		DTC
EHMT2	EHMT2	Definite	EHMT2	DYCLONINE		DTC
EHMT2	EHMT2	Definite	EHMT2	CHEMBL1328677		DTC
EHMT2	EHMT2	Definite	EHMT2	CHEMBL606456		DTC
EHMT2	EHMT2	Definite	EHMT2	HISTAMINE		DTC
EHMT2	EHMT2	Definite	EHMT2	WIN-552122		DTC
EHMT2	EHMT2	Definite	EHMT2	CLIOQUINOL		DTC
EHMT2	EHMT2	Definite	EHMT2	CHEMBL590168		DTC
EHMT2	EHMT2	Definite	EHMT2	CHEMBL602206		DTC
EHMT2	EHMT2	Definite	EHMT2	CHEMBL541585		DTC
EHMT2	EHMT2	Definite	EHMT2	CHEMBL56542		DTC
EHMT2	EHMT2	Definite	EHMT2	CHEMBL515495		DTC
EHMT2	EHMT2	Definite	EHMT2	DANTHRON		DTC
EHMT2	EHMT2	Definite	EHMT2	CHEMBL533602		DTC
EHMT2	EHMT2	Definite	EHMT2	NALIDIXIC ACID		DTC
EHMT2	EHMT2	Definite	EHMT2	BUTHIONINE SULFOXIMINE		DTC
EHMT2	EHMT2	Definite	EHMT2	IMIPRAMINE		DTC
EHMT2	EHMT2	Definite	EHMT2	ARACHIDONIC ACID		DTC
EHMT2	EHMT2	Definite	EHMT2	CHEMBL547304		DTC
EHMT2	EHMT2	Definite	EHMT2	CHEMBL583150		DTC
EHMT2	EHMT2	Definite	EHMT2	CHEMBL528119		DTC
EHMT2	EHMT2	Definite	EHMT2	DISULFIRAM		DTC
EHMT2	EHMT2	Definite	EHMT2	CHEMBL403741		DTC
EHMT2	EHMT2	Definite	EHMT2	DIPYRITHIONE		DTC
EHMT2	EHMT2	Definite	EHMT2	BENANSERIN HYDROCHLORIDE		DTC
EHMT2	EHMT2	Definite	EHMT2	8-OH-DPAT		DTC
EHMT2	EHMT2	Definite	EHMT2	2-MERCAPTOBENZIMIDAZOLE		DTC
EHMT2	EHMT2	Definite	EHMT2	CYSTEAMINE HYDROCHLORIDE		DTC
EHMT2	EHMT2	Definite	EHMT2	CHEMBL576781		DTC	19891491
EHMT2	EHMT2	Definite	EHMT2	CHEMBL344127		DTC
EHMT2	EHMT2	Definite	EHMT2	MITOXANTRONE		DTC
EHMT2	EHMT2	Definite	EHMT2	THIOGUANOSINE		DTC
EHMT2	EHMT2	Definite	EHMT2	KENPAULLONE		DTC
EHMT2	EHMT2	Definite	EHMT2	CHEMBL295212		DTC
EHMT2	EHMT2	Definite	EHMT2	CHEMBL1486366		DTC
EHMT2	EHMT2	Definite	EHMT2	CHEMBL581872		DTC
EHMT2	EHMT2	Definite	EHMT2	FLUSPIRILENE		DTC
EHMT2	EHMT2	Definite	EHMT2	SALMETEROL XINAFOATE		DTC
EHMT2	EHMT2	Definite	EHMT2	CHEMBL1509789		DTC
EHMT2	EHMT2	Definite	EHMT2	CANAVANINE		DTC
EHMT2	EHMT2	Definite	EHMT2	CHEMBL585030		DTC
EHMT2	EHMT2	Definite	EHMT2	CHEMBL166486		DTC
EHMT2	EHMT2	Definite	EHMT2	CHEMBL538798		DTC
EHMT2	EHMT2	Definite	EHMT2	FUSARIC ACID		DTC
EHMT2	EHMT2	Definite	EHMT2	ENOXAMAST		DTC
EHMT2	EHMT2	Definite	EHMT2	PHENAZINE-1-CARBOXYLIC ACID		DTC
EHMT2	EHMT2	Definite	EHMT2	CHEMBL589694		DTC
EHMT2	EHMT2	Definite	EHMT2	METHOCTRAMINE		DTC
EHMT2	EHMT2	Definite	EHMT2	PHENAZINE		DTC
EHMT2	EHMT2	Definite	EHMT2	L-MIMOSINE		DTC
EHMT2	EHMT2	Definite	EHMT2	CHEMBL530664		DTC
EHMT2	EHMT2	Definite	EHMT2	CHEMBL527586		DTC
EHMT2	EHMT2	Definite	EHMT2	THIOSALICYLIC ACID		DTC
EHMT2	EHMT2	Definite	EHMT2	DIETHYLCARBAMAZINE CITRATE		DTC
EHMT2	EHMT2	Definite	EHMT2	GOSSYPOL		DTC
EHMT2	EHMT2	Definite	EHMT2	SEROTONIN		DTC
EHMT2	EHMT2	Definite	EHMT2	R-N-PROPYLNORAPOMORPHINE		DTC
EHMT2	EHMT2	Definite	EHMT2	CHEMBL1383812		DTC
EHMT2	EHMT2	Definite	EHMT2	CHEMBL547656		DTC
EHMT2	EHMT2	Definite	EHMT2	CHEMBL466465		DTC
EHMT2	EHMT2	Definite	EHMT2	PHENINDIONE		DTC
EHMT2	EHMT2	Definite	EHMT2	(-)-U-50488		DTC
EHMT2	EHMT2	Definite	EHMT2	AMILORIDE		DTC
EHMT2	EHMT2	Definite	EHMT2	CHEMBL598663		DTC
EHMT2	EHMT2	Definite	EHMT2	ETAZOLATE		DTC
EHMT2	EHMT2	Definite	EHMT2	CHEMBL578294		DTC
EHMT2	EHMT2	Definite	EHMT2	CHEMBL576353		DTC
EHMT2	EHMT2	Definite	EHMT2	CGP-53353		DTC
EHMT2	EHMT2	Definite	EHMT2	CHLORPROMAZINE HYDROCHLORIDE		DTC
EHMT2	EHMT2	Definite	EHMT2	N-METHYL-D-ASPARTIC ACID (NMDA)		DTC
EHMT2	EHMT2	Definite	EHMT2	EPINEPHRINE BITARTRATE		DTC
EHMT2	EHMT2	Definite	EHMT2	CHEMBL599098		DTC
EHMT2	EHMT2	Definite	EHMT2	CHEMBL1478462		DTC
EHMT2	EHMT2	Definite	EHMT2	PHENELZINE		DTC
EHMT2	EHMT2	Definite	EHMT2	CHLOROETHYLCLONIDINE		DTC
EHMT2	EHMT2	Definite	EHMT2	NORBINALTORPHIMINE		DTC
EHMT2	EHMT2	Definite	EHMT2	INDOCATE		DTC
EHMT2	EHMT2	Definite	EHMT2	FOMEPIZOLE		DTC
EHMT2	EHMT2	Definite	EHMT2	KETOCONAZOLE		DTC
EHMT2	EHMT2	Definite	EHMT2	NALOXONE BENZOYLHYDRAZONE		DTC
EHMT2	EHMT2	Definite	EHMT2	CHEMBL2095095		DTC
EHMT2	EHMT2	Definite	EHMT2	CYTARABINE		DTC
EHMT2	EHMT2	Definite	EHMT2	CHEMBL1232076		DTC
EHMT2	EHMT2	Definite	EHMT2	SB-202190		DTC
EHMT2	EHMT2	Definite	EHMT2	CHEMBL525106		DTC
EHMT2	EHMT2	Definite	EHMT2	SALUBRINAL		DTC
EHMT2	EHMT2	Definite	EHMT2	CHEMBL589245		DTC
EHMT2	EHMT2	Definite	EHMT2	BRONOPOL		DTC
EHMT2	EHMT2	Definite	EHMT2	CHEMBL585502		DTC
EHMT2	EHMT2	Definite	EHMT2	SCARLET RED		DTC
EHMT2	EHMT2	Definite	EHMT2	CHEMBL582697		DTC
EHMT2	EHMT2	Definite	EHMT2	INDIGO		DTC
EHMT2	EHMT2	Definite	EHMT2	BISMUTH SUBSALICYLATE		DTC
EHMT2	EHMT2	Definite	EHMT2	DYCLONINE HYDROCHLORIDE		DTC
EHMT2	EHMT2	Definite	EHMT2	CHEMBL582764		DTC
EHMT2	EHMT2	Definite	EHMT2	CHEMBL1256845		DTC
EHMT2	EHMT2	Definite	EHMT2	0-HEXYL-1,3-DIAMINE-PLATINUM 2,2-DICHLORIDE		DTC
EHMT2	EHMT2	Definite	EHMT2	CAPENSIN		DTC
EHMT2	EHMT2	Definite	EHMT2	THIOINOSINE		DTC
EHMT2	EHMT2	Definite	EHMT2	CHEMBL1368696		DTC
EHMT2	EHMT2	Definite	EHMT2	CISPLATIN		DTC
EHMT2	EHMT2	Definite	EHMT2	PAPAVERINE		DTC
EHMT2	EHMT2	Definite	EHMT2	CHEMBL1236602		DTC
EHMT2	EHMT2	Definite	EHMT2	CAMPTOTHECIN		DTC
EHMT2	EHMT2	Definite	EHMT2	CHEMBL297304		DTC
EHMT2	EHMT2	Definite	EHMT2	CHEMBL1814509		DTC
EHMT2	EHMT2	Definite	EHMT2	CHEMBL582694		DTC
EHMT2	EHMT2	Definite	EHMT2	IODOFORM		DTC
EHMT2	EHMT2	Definite	EHMT2	RHEIN		DTC
EHMT2	EHMT2	Definite	EHMT2	PYROGALLOL		DTC
EHMT2	EHMT2	Definite	EHMT2	FENOLDOPAM BROMIDE		DTC
EHMT2	EHMT2	Definite	EHMT2	GUAIAZULEN		DTC
EHMT2	EHMT2	Definite	EHMT2	CHEMBL234338		DTC
EHMT2	EHMT2	Definite	EHMT2	CHEMBL1483413		DTC
EHMT2	EHMT2	Definite	EHMT2	CHEMBL591137		DTC
EHMT2	EHMT2	Definite	EHMT2	BRIMONIDINE		DTC
EHMT2	EHMT2	Definite	EHMT2	OXYTETRACYCLINE		DTC
EHMT2	EHMT2	Definite	EHMT2	CONGO RED		DTC
EHMT2	EHMT2	Definite	EHMT2	PHENELZINE SULFATE		DTC
EHMT2	EHMT2	Definite	EHMT2	CHEMBL1442783		DTC
EHMT2	EHMT2	Definite	EHMT2	PHYSOSTIGMINE		DTC
EHMT2	EHMT2	Definite	EHMT2	CHEMBL258767		DTC
EHMT2	EHMT2	Definite	EHMT2	NORDEXFENFLURAMINE		DTC
EHMT2	EHMT2	Definite	EHMT2	DIACEREIN		DTC
EHMT2	EHMT2	Definite	EHMT2	CYSTAMINE		DTC
EHMT2	EHMT2	Definite	EHMT2	METITEPINE		DTC
EHMT2	EHMT2	Definite	EHMT2	CHEMBL587856		DTC
EHMT2	EHMT2	Definite	EHMT2	DAMNACANTHAL		DTC
EHMT2	EHMT2	Definite	EHMT2	SALSOLINOL HYDROBROMIDE		DTC
EHMT2	EHMT2	Definite	EHMT2	CHEMBL547175		DTC
EHMT2	EHMT2	Definite	EHMT2	PORFIROMYCIN		DTC
EHMT2	EHMT2	Definite	EHMT2	METHYLMALONIC ACID		DTC
EHMT2	EHMT2	Definite	EHMT2	CHEMBL56731		DTC
EHMT2	EHMT2	Definite	EHMT2	HOMIDIUM		DTC
EHMT2	EHMT2	Definite	EHMT2	CHEMBL577222		DTC
EHMT2	EHMT2	Definite	EHMT2	SPERMINE		DTC
EHMT2	EHMT2	Definite	EHMT2	ANTHRALIN		DTC
EHMT2	EHMT2	Definite	EHMT2	TREQUINSIN		DTC
EHMT2	EHMT2	Definite	EHMT2	GW7647		DTC
EHMT2	EHMT2	Definite	EHMT2	CYCLOVALONE		DTC
EHMT2	EHMT2	Definite	EHMT2	CHEMBL601385		DTC
EHMT2	EHMT2	Definite	EHMT2	ZAPA		DTC
EHMT2	EHMT2	Definite	EHMT2	BUFLOMEDIL		DTC
EHMT2	EHMT2	Definite	EHMT2	ACETYLSEROTONIN		DTC
EHMT2	EHMT2	Definite	EHMT2	CHEMBL585240		DTC
EHMT2	EHMT2	Definite	EHMT2	CHEMBL538542		DTC
EHMT2	EHMT2	Definite	EHMT2	LOMOFUNGIN		DTC
EHMT2	EHMT2	Definite	EHMT2	FENRETINIDE		DTC
EHMT2	EHMT2	Definite	EHMT2	INDIGOTINDISULFONATE		DTC
EHMT2	EHMT2	Definite	EHMT2	CARMINE		DTC
EHMT2	EHMT2	Definite	EHMT2	CHEMBL527585		DTC
EHMT2	EHMT2	Definite	EHMT2	CHEMBL586195		DTC
EHMT2	EHMT2	Definite	EHMT2	BENFLUOREX HYDROCHLORIDE		DTC
EHMT2	EHMT2	Definite	EHMT2	NIALAMIDE		DTC
EHMT2	EHMT2	Definite	EHMT2	DOPAMINE HYDROCHLORIDE		DTC
EHMT2	EHMT2	Definite	EHMT2	(R,S)-AMPA		DTC
EHMT2	EHMT2	Definite	EHMT2	GR-127935		DTC
EHMT2	EHMT2	Definite	EHMT2	GR-55562		DTC
EHMT2	EHMT2	Definite	EHMT2	QUINOLINIC ACID		DTC
EHMT2	EHMT2	Definite	EHMT2	PYRROLIDINE DITHIOCARBAMIC ACID, AMMONIUM SALT		DTC
EHMT2	EHMT2	Definite	EHMT2	CHEMBL27403		DTC
EHMT2	EHMT2	Definite	EHMT2	THIOGUANINE		DTC
EHMT2	EHMT2	Definite	EHMT2	CHEMBL1341830		DTC
EHMT2	EHMT2	Definite	EHMT2	GALLIC ACID METHYL ESTER		DTC
EHMT2	EHMT2	Definite	EHMT2	CHEMBL56393		DTC
EHMT2	EHMT2	Definite	EHMT2	CHEMBL1331995		DTC
EHMT2	EHMT2	Definite	EHMT2	PD-169316		DTC
EHMT2	EHMT2	Definite	EHMT2	MENADIONE		DTC
EHMT2	EHMT2	Definite	EHMT2	CHEMBL428789		DTC
EHMT2	EHMT2	Definite	EHMT2	OLPRINONE		DTC
EHMT2	EHMT2	Definite	EHMT2	METHYLDOPA (RACEMIC)		DTC
EHMT2	EHMT2	Definite	EHMT2	METHYLDOPA		DTC
EHMT2	EHMT2	Definite	EHMT2	CHEMBL1256186		DTC
EHMT2	EHMT2	Definite	EHMT2	NIFEDIPINE		DTC
EHMT2	EHMT2	Definite	EHMT2	DIMETHYLPHENYLPIPERAZINIUM		DTC
EHMT2	EHMT2	Definite	EHMT2	CHEMBL17329		DTC
EHMT2	EHMT2	Definite	EHMT2	NOLATREXED		DTC
EHMT2	EHMT2	Definite	EHMT2	CHEMBL569864	inhibitor	GuideToPharmacology
EHMT2	EHMT2	Definite	EHMT2	BENSERAZIDE		DTC
EHMT2	EHMT2	Definite	EHMT2	ERGOCRYPTINE		DTC
EHMT2	EHMT2	Definite	EHMT2	CHEMBL1449731		DTC
EHMT2	EHMT2	Definite	EHMT2	CHEMBL520992		DTC
EHMT2	EHMT2	Definite	EHMT2	CHEMBL186526		DTC
EHMT2	EHMT2	Definite	EHMT2	BENSERAZIDE HYDROCHLORIDE		DTC
EHMT2	EHMT2	Definite	EHMT2	ALFUZOSIN		DTC
EHMT2	EHMT2	Definite	EHMT2	CROCIN		DTC
EHMT2	EHMT2	Definite	EHMT2	CHEMBL431504		DTC
EHMT2	EHMT2	Definite	EHMT2	E324		DTC
EHMT2	EHMT2	Definite	EHMT2	CHEMBL592558		DTC
EHMT2	EHMT2	Definite	EHMT2	CHEMBL140020		DTC
EHMT2	EHMT2	Definite	EHMT2	CHEMBL461579		DTC
EHMT2	EHMT2	Definite	EHMT2	DOXYCYCLINE		DTC
EHMT2	EHMT2	Definite	EHMT2	PHENOTHIAZINE		DTC
EHMT2	EHMT2	Definite	EHMT2	AMANTADINE HYDROCHLORIDE		DTC
EHMT2	EHMT2	Definite	EHMT2	FOSFONET		DTC
EHMT2	EHMT2	Definite	EHMT2	CHEMBL595227		DTC
EHMT2	EHMT2	Definite	EHMT2	S-NITROSOGLUTATHIONE		DTC
EHMT2	EHMT2	Definite	EHMT2	BUFEXAMAC		DTC
EHMT2	EHMT2	Definite	EHMT2	CHEMBL589711		DTC
EHMT2	EHMT2	Definite	EHMT2	PROCHLORPERAZINE EDISYLATE		DTC
EHMT2	EHMT2	Definite	EHMT2	CHEMBL547483		DTC
EHMT2	EHMT2	Definite	EHMT2	CHEMBL475813		DTC
EHMT2	EHMT2	Definite	EHMT2	AGROCLAVINE		DTC
EHMT2	EHMT2	Definite	EHMT2	CHEMBL582287		DTC
EHMT2	EHMT2	Definite	EHMT2	CHEMBL2094456		DTC
EHMT2	EHMT2	Definite	EHMT2	CHEMBL472940		DTC
EHMT2	EHMT2	Definite	EHMT2	CHEMBL24983		DTC
EHMT2	EHMT2	Definite	EHMT2	AP-7		DTC
EHMT2	EHMT2	Definite	EHMT2	CHEMBL429095		DTC
EHMT2	EHMT2	Definite	EHMT2	PURPUROGALLIN		DTC
EHMT2	EHMT2	Definite	EHMT2	CHELERYTHRINE		DTC
EHMT2	EHMT2	Definite	EHMT2	LAPACHONE		DTC
EHMT2	EHMT2	Definite	EHMT2	NARINGIN		DTC
EHMT2	EHMT2	Definite	EHMT2	TAMOXIFEN		DTC
EHMT2	EHMT2	Definite	EHMT2	CHEMBL559934		DTC
EHMT2	EHMT2	Definite	EHMT2	LINOLENIC ACID		DTC
EHMT2	EHMT2	Definite	EHMT2	SULINDAC		DTC
EHMT2	EHMT2	Definite	EHMT2	NALOXONE HYDROCHLORIDE		DTC
EHMT2	EHMT2	Definite	EHMT2	APOCIDEINE		DTC
EHMT2	EHMT2	Definite	EHMT2	ERGOCRISTINE		DTC
EHMT2	EHMT2	Definite	EHMT2	CYCLOPHOSPHAMIDE		DTC
EHMT2	EHMT2	Definite	EHMT2	PHENSERINE		DTC
EHMT2	EHMT2	Definite	EHMT2	MIANSERIN HYDROCHLORIDE		DTC
EHMT2	EHMT2	Definite	EHMT2	ACTINONIN		DTC
EHMT2	EHMT2	Definite	EHMT2	CHEMBL86464		DTC
EHMT2	EHMT2	Definite	EHMT2	RALOXIFENE HYDROCHLORIDE		DTC
EHMT2	EHMT2	Definite	EHMT2	CHEMBL596631		DTC
EHMT2	EHMT2	Definite	EHMT2	AZEPEXOLE		DTC
EHMT2	EHMT2	Definite	EHMT2	CHEMBL600701		DTC
EHMT2	EHMT2	Definite	EHMT2	CHEMBL339587		DTC
EHMT2	EHMT2	Definite	EHMT2	CHEMBL284609		DTC
EHMT2	EHMT2	Definite	EHMT2	ISOPROTERENOL		DTC
EHMT2	EHMT2	Definite	EHMT2	CHEMBL578512		DTC
EHMT2	EHMT2	Definite	EHMT2	METHYLSELENOCYSTEINE		DTC
EHMT2	EHMT2	Definite	EHMT2	TYRPHOSTIN AG 879		DTC
EHMT2	EHMT2	Definite	EHMT2	DOXORUBICIN HYDROCHLORIDE		DTC
EHMT2	EHMT2	Definite	EHMT2	CHEMBL121915		DTC
EHMT2	EHMT2	Definite	EHMT2	NOMIFENSINE		DTC
EHMT2	EHMT2	Definite	EHMT2	THIOPROPERAZINE MESYLATE		DTC
EHMT2	EHMT2	Definite	EHMT2	ARACHIDONOYL GLYCINE		DTC
EHMT2	EHMT2	Definite	EHMT2	GF-109203		DTC
EHMT2	EHMT2	Definite	EHMT2	FENCLONINE		DTC
EHMT2	EHMT2	Definite	EHMT2	CHLOROXINE		DTC
EHMT2	EHMT2	Definite	EHMT2	DOXYLAMINE		DTC
EHMT2	EHMT2	Definite	EHMT2	PHOSMET		DTC
EHMT2	EHMT2	Definite	EHMT2	SOBUZOXANE		DTC
EHMT2	EHMT2	Definite	EHMT2	EPHEDRINE SULFATE		DTC
EHMT2	EHMT2	Definite	EHMT2	CHEMBL547269		DTC
EHMT2	EHMT2	Definite	EHMT2	MERCURIC CHLORIDE		DTC
EHMT2	EHMT2	Definite	EHMT2	FLUPHENAZINE HYDROCHLORIDE		DTC
EHMT2	EHMT2	Definite	EHMT2	LANSOPRAZOLE		DTC
EHMT2	EHMT2	Definite	EHMT2	CEPHALEXIN		DTC
EHMT2	EHMT2	Definite	EHMT2	CHEMBL532160		DTC
EHMT2	EHMT2	Definite	EHMT2	CALMIDAZOLIUM CHLORIDE		DTC
EHMT2	EHMT2	Definite	EHMT2	CHEMBL1256863		DTC
EHMT2	EHMT2	Definite	EHMT2	DIMETHYLPHENYLPIPERAZINIUM IODIDE		DTC
EHMT2	EHMT2	Definite	EHMT2	CHEMBL1256920		DTC
EHMT2	EHMT2	Definite	EHMT2	APOMORPHINE HYDROCHLORIDE HEMIHYDRATE		DTC
EHMT2	EHMT2	Definite	EHMT2	CHEMBL602763		DTC
EHMT2	EHMT2	Definite	EHMT2	METHYLERGONOVINE		DTC
EHMT2	EHMT2	Definite	EHMT2	SURAMIN		DTC
EHMT2	EHMT2	Definite	EHMT2	CARBOXYMETHOXYLAMINE		DTC
EHMT2	EHMT2	Definite	EHMT2	CHEMBL1503729		DTC
EHMT2	EHMT2	Definite	EHMT2	BENZYL NICOTINATE		DTC
EHMT2	EHMT2	Definite	EHMT2	CHEMBL395915		DTC
EHMT2	EHMT2	Definite	EHMT2	YOHIMBINE		DTC
EHMT2	EHMT2	Definite	EHMT2	CHEMBL179611		DTC
EHMT2	EHMT2	Definite	EHMT2	UMIFENOVIR		DTC
EHMT2	EHMT2	Definite	EHMT2	CHEMBL84010		DTC
EHMT2	EHMT2	Definite	EHMT2	GLUTAMIC ACID		DTC
EHMT2	EHMT2	Definite	EHMT2	CHEMBL603739		DTC
EHMT2	EHMT2	Definite	EHMT2	DIAMIDE		DTC
EHMT2	EHMT2	Definite	EHMT2	FENAMIC ACID		DTC
EHMT2	EHMT2	Definite	EHMT2	HARMINE HYDROCHLORIDE		DTC
EHMT2	EHMT2	Definite	EHMT2	TRYPTOPHAN		DTC
EHMT2	EHMT2	Definite	EHMT2	MG-132		DTC
EHMT2	EHMT2	Definite	EHMT2	ARUNDINE		DTC
EHMT2	EHMT2	Definite	EHMT2	CHEMBL1534034		DTC
EHMT2	EHMT2	Definite	EHMT2	BUSPIRONE		DTC
EHMT2	EHMT2	Definite	EHMT2	CHEMBL586982		DTC
EHMT2	EHMT2	Definite	EHMT2	CHEMBL1545737		DTC
EHMT2	EHMT2	Definite	EHMT2	CHEMBL1256797		DTC
EHMT2	EHMT2	Definite	EHMT2	CHEMBL581152		DTC
EHMT2	EHMT2	Definite	EHMT2	CHEMBL224032		DTC
EHMT2	EHMT2	Definite	EHMT2	CHEMBL532143		DTC
EHMT2	EHMT2	Definite	EHMT2	SR-2640		DTC
EHMT2	EHMT2	Definite	EHMT2	CHEMBL590186		DTC
EHMT2	EHMT2	Definite	EHMT2	RISEDRONIC ACID		DTC
EHMT2	EHMT2	Definite	EHMT2	TRETINOIN		DTC
EHMT2	EHMT2	Definite	EHMT2	CHEMBL1308346		DTC
EHMT2	EHMT2	Definite	EHMT2	CHEMBL1335833		DTC
EHMT2	EHMT2	Definite	EHMT2	RABEPRAZOLE		DTC
EHMT2	EHMT2	Definite	EHMT2	CHEMBL589924		DTC
EHMT2	EHMT2	Definite	EHMT2	CHEMBL1255936		DTC
EHMT2	EHMT2	Definite	EHMT2	CHEMBL548615		DTC
EHMT2	EHMT2	Definite	EHMT2	CHEMBL602990		DTC
EHMT2	EHMT2	Definite	EHMT2	CHELIDAMIC ACID		DTC
EHMT2	EHMT2	Definite	EHMT2	EFLORNITHINE		DTC
EHMT2	EHMT2	Definite	EHMT2	CHEMBL527584		DTC
EHMT2	EHMT2	Definite	EHMT2	CHEMBL600747		DTC
EHMT2	EHMT2	Definite	EHMT2	CHEMBL523200		DTC
EHMT2	EHMT2	Definite	EHMT2	CHEMBL592588		DTC
EHMT2	EHMT2	Definite	EHMT2	CHEMBL600692		DTC
EHMT2	EHMT2	Definite	EHMT2	QUINACRINE		DTC
EHMT2	EHMT2	Definite	EHMT2	CHEMBL261557		DTC
EHMT2	EHMT2	Definite	EHMT2	THIOTHIXENE HYDROCHLORIDE		DTC
EHMT2	EHMT2	Definite	EHMT2	CHEMBL582722		DTC
EHMT2	EHMT2	Definite	EHMT2	CHEMBL596380		DTC
EHMT2	EHMT2	Definite	EHMT2	TALIPEXOLE		DTC
EHMT2	EHMT2	Definite	EHMT2	HYPERICIN		DTC
EHMT2	EHMT2	Definite	EHMT2	CHEMBL1256813		DTC
EHMT2	EHMT2	Definite	EHMT2	HERACLENOL		DTC
EHMT2	EHMT2	Definite	EHMT2	CYCLOPHOSPHAMIDE		DTC
EHMT2	EHMT2	Definite	EHMT2	DEBRISOQUIN SULFATE		DTC
EHMT2	EHMT2	Definite	EHMT2	IDARUBICIN		DTC
EHMT2	EHMT2	Definite	EHMT2	CHEMBL536166		DTC
EHMT2	EHMT2	Definite	EHMT2	INAMRINONE		DTC
EHMT2	EHMT2	Definite	EHMT2	DEXBROMPHENIRAMINE		DTC
EHMT2	EHMT2	Definite	EHMT2	CHLOROGENIC ACID		DTC
EHMT2	EHMT2	Definite	EHMT2	TANNIC ACID		DTC
EHMT2	EHMT2	Definite	EHMT2	LAVENDUSTIN A		DTC
EHMT2	EHMT2	Definite	EHMT2	CHEMBL1256995		DTC
EHMT2	EHMT2	Definite	EHMT2	CHEMBL338314		DTC
EHMT2	EHMT2	Definite	EHMT2	CHEMBL584458		DTC
EHMT2	EHMT2	Definite	EHMT2	THIOTEPA		DTC
EHMT2	EHMT2	Definite	EHMT2	U-0126		DTC
EHMT2	EHMT2	Definite	EHMT2	CHEMBL154580		DTC
EHMT2	EHMT2	Definite	EHMT2	NICARDIPINE HYDROCHLORIDE		DTC
EHMT2	EHMT2	Definite	EHMT2	BEPRIDIL		DTC
EHMT2	EHMT2	Definite	EHMT2	CHEMBL59030		DTC
EHMT2	EHMT2	Definite	EHMT2	CHEMBL68534		DTC
EHMT2	EHMT2	Definite	EHMT2	CHEMBL527336		DTC
EHMT2	EHMT2	Definite	EHMT2	MOLINDONE		DTC
EHMT2	EHMT2	Definite	EHMT2	( )-TAXIFOLIN		DTC
EHMT2	EHMT2	Definite	EHMT2	CYSTEINE		DTC
EHMT2	EHMT2	Definite	EHMT2	CHEMBL316796		DTC
EHMT2	EHMT2	Definite	EHMT2	PROCHLORPERAZINE		DTC
EHMT2	EHMT2	Definite	EHMT2	PAROXETINE		DTC
EHMT2	EHMT2	Definite	EHMT2	CHEMBL609606		DTC
EHMT2	EHMT2	Definite	EHMT2	HYPEROSIDE		DTC
EHMT2	EHMT2	Definite	EHMT2	CHEMBL532412		DTC
EHMT2	EHMT2	Definite	EHMT2	TALIPEXOLE HYDROCHLORIDE		DTC
EHMT2	EHMT2	Definite	EHMT2	NALOXONE METHIODIDE		DTC
EHMT2	EHMT2	Definite	EHMT2	CHEMBL1448793		DTC
EHMT2	EHMT2	Definite	EHMT2	CHEMBL582737		DTC
EHMT2	EHMT2	Definite	EHMT2	CATECHOL		DTC
EHMT2	EHMT2	Definite	EHMT2	SURAMIN HEXASODIUM		DTC
EHMT2	EHMT2	Definite	EHMT2	GLUTAMIC ACID HYDROCHLORIDE		DTC
EHMT2	EHMT2	Definite	EHMT2	CHEMBL1307453		DTC
EHMT2	EHMT2	Definite	EHMT2	PHENYLBUTAZONE		DTC
EHMT2	EHMT2	Definite	EHMT2	METHYSERGIDE		DTC
EHMT2	EHMT2	Definite	EHMT2	APAZONE		DTC
EHMT2	EHMT2	Definite	EHMT2	CHEMBL193093		DTC
EHMT2	EHMT2	Definite	EHMT2	CEFOTIAM HYDROCHLORIDE		DTC
EHMT2	EHMT2	Definite	EHMT2	CEPHARANTHINE		DTC
EHMT2	EHMT2	Definite	EHMT2	CHEMBL1256364		DTC
EHMT2	EHMT2	Definite	EHMT2	DAUNORUBICIN		DTC
EHMT2	EHMT2	Definite	EHMT2	4-BENZYLOXYANILINE		DTC
EHMT2	EHMT2	Definite	EHMT2	IDAZOXAN HYDROCHLORIDE		DTC
EHMT2	EHMT2	Definite	EHMT2	CHEMBL198666		DTC
EHMT2	EHMT2	Definite	EHMT2	INDOLE-3-CARBINOL		DTC
EHMT2	EHMT2	Definite	EHMT2	DICYCLOMINE		DTC
EHMT2	EHMT2	Definite	EHMT2	MORIN		DTC
EHMT2	EHMT2	Definite	EHMT2	CHEMBL577851		DTC
EHMT2	EHMT2	Definite	EHMT2	CHEMBL596836		DTC
EHMT2	EHMT2	Definite	EHMT2	CHEMBL545184		DTC
EHMT2	EHMT2	Definite	EHMT2	SULFINPYRAZONE		DTC
EHMT2	EHMT2	Definite	EHMT2	BISINDOLYLMALEIMIDE IX		DTC
EHMT2	EHMT2	Definite	EHMT2	CHEMBL584452		DTC
EHMT2	EHMT2	Definite	EHMT2	PALIPERIDONE		DTC
EHMT2	EHMT2	Definite	EHMT2	NORDIHYDROGUAIARETIC ACID		DTC
EHMT2	EHMT2	Definite	EHMT2	CARNOSIC ACID		DTC
EHMT2	EHMT2	Definite	EHMT2	OXYPHENBUTAZONE		DTC
EHMT2	EHMT2	Definite	EHMT2	CHEMBL599957		DTC
EHMT2	EHMT2	Definite	EHMT2	CARBETAPENTANE		DTC
EHMT2	EHMT2	Definite	EHMT2	BRILLIANT GREEN OXALATE		DTC
EHMT2	EHMT2	Definite	EHMT2	CHEMBL313737		DTC
EHMT2	EHMT2	Definite	EHMT2	ORPHENADRINE CITRATE		DTC
EHMT2	EHMT2	Definite	EHMT2	FLUPIRTINE MALEATE		DTC
EHMT2	EHMT2	Definite	EHMT2	MUSCARINE		DTC
EHMT2	EHMT2	Definite	EHMT2	CHEMBL1172228		DTC
EHMT2	EHMT2	Definite	EHMT2	ERGOCORNINE		DTC
EHMT2	EHMT2	Definite	EHMT2	MIZORIBINE		DTC
EHMT2	EHMT2	Definite	EHMT2	CHEMBL56543		DTC
EHMT2	EHMT2	Definite	EHMT2	CHEMBL1426508		DTC
EHMT2	EHMT2	Definite	EHMT2	PROMETHAZINE HYDROCHLORIDE		DTC
EHMT2	EHMT2	Definite	EHMT2	CHEMBL530280		DTC
EHMT2	EHMT2	Definite	EHMT2	CHEMBL211042		DTC
EHMT2	EHMT2	Definite	EHMT2	OXYMETHOLONE		DTC
EHMT2	EHMT2	Definite	EHMT2	PYRROLIDINE DITHIOCARBAMATE		DTC
EHMT2	EHMT2	Definite	EHMT2	CHEMBL317356		DTC
EHMT2	EHMT2	Definite	EHMT2	CHEMBL1255656		DTC
EHMT2	EHMT2	Definite	EHMT2	CHEMBL600769		DTC
EHMT2	EHMT2	Definite	EHMT2	THIORIDAZINE HYDROCHLORIDE		DTC
EHMT2	EHMT2	Definite	EHMT2	CHEMBL1310701		DTC
EHMT2	EHMT2	Definite	EHMT2	DAPHNETIN		DTC
EHMT2	EHMT2	Definite	EHMT2	CHEMBL1984884		DTC
EHMT2	EHMT2	Definite	EHMT2	CARBIDOPA		DTC
EHMT2	EHMT2	Definite	EHMT2	ENROFLOXACIN		DTC
EHMT2	EHMT2	Definite	EHMT2	CHEMBL67535		DTC
EHMT2	EHMT2	Definite	EHMT2	DITHIAZANINE IODIDE		DTC
EHMT2	EHMT2	Definite	EHMT2	CHEMBL565893		DTC
EHMT2	EHMT2	Definite	EHMT2	FLUTAMIDE		DTC
EHMT2	EHMT2	Definite	EHMT2	PROSTAGLANDIN A2		DTC
EHMT2	EHMT2	Definite	EHMT2	CHEMBL578504		DTC
EHMT2	EHMT2	Definite	EHMT2	PALMITOYL-CARNITINE		DTC
EHMT2	EHMT2	Definite	EHMT2	ELLAGIC ACID		DTC
EHMT2	EHMT2	Definite	EHMT2	CHEMBL171699		DTC
EHMT2	EHMT2	Definite	EHMT2	IODOPHTHALEIN		DTC
EHMT2	EHMT2	Definite	EHMT2	LOMEFLOXACIN		DTC
EHMT2	EHMT2	Definite	EHMT2	MELPHALAN		DTC
EHMT2	EHMT2	Definite	EHMT2	NIMESULIDE		DTC
EHMT2	EHMT2	Definite	EHMT2	IPRONIAZID PHOSPHATE		DTC
EHMT2	EHMT2	Definite	EHMT2	METERGOLINE		DTC
EHMT2	EHMT2	Definite	EHMT2	CHEMBL600734		DTC
EHMT2	EHMT2	Definite	EHMT2	CHEMBL116548		DTC
EHMT2	EHMT2	Definite	EHMT2	GABACULINE HYDROCHLORIDE		DTC
EHMT2	EHMT2	Definite	EHMT2	VINPOCETINE		DTC
EHMT2	EHMT2	Definite	EHMT2	CHEMBL1459149		DTC
EHMT2	EHMT2	Definite	EHMT2	BETAXOLOL HYDROCHLORIDE		DTC
EHMT2	EHMT2	Definite	EHMT2	AMSACRINE		DTC
EHMT2	EHMT2	Definite	EHMT2	XANTHINE AMINE CONGENER		DTC
EHMT2	EHMT2	Definite	EHMT2	DEXTROMEPROMAZINE		DTC
EHMT2	EHMT2	Definite	EHMT2	CHEMBL512649		DTC
EHMT2	EHMT2	Definite	EHMT2	CHEMBL1465049		DTC
EHMT2	EHMT2	Definite	EHMT2	SANGUINARIUM CHLORIDE		DTC
EHMT2	EHMT2	Definite	EHMT2	CHEMBL299853		DTC
EHMT2	EHMT2	Definite	EHMT2	TRANSTORINE		DTC
EHMT2	EHMT2	Definite	EHMT2	IMETIT		DTC
EHMT2	EHMT2	Definite	EHMT2	N-ETHYLMALEIMIDE		DTC
EHMT2	EHMT2	Definite	EHMT2	CHEMBL122355		DTC
EHMT2	EHMT2	Definite	EHMT2	APOMORPHINE		DTC
EHMT2	EHMT2	Definite	EHMT2	IBUFENAC		DTC
EHMT2	EHMT2	Definite	EHMT2	CEFOTAXIME SODIUM		DTC
EHMT2	EHMT2	Definite	EHMT2	OMEPRAZOLE MAGNESIUM		DTC
EHMT2	EHMT2	Definite	EHMT2	PROPYLENE GLYCOL MONOSTEARATE		DTC
EHMT2	EHMT2	Definite	EHMT2	CHEMBL1310138		DTC
EHMT2	EHMT2	Definite	EHMT2	CHEMBL457504		DTC
EHMT2	EHMT2	Definite	EHMT2	CHEMBL403183		DTC
EHMT2	EHMT2	Definite	EHMT2	Z-PRO-PROLINAL		DTC
EHMT2	EHMT2	Definite	EHMT2	CHEMBL603370		DTC
EHMT2	EHMT2	Definite	EHMT2	IODOACETAMIDE		DTC
EHMT2	EHMT2	Definite	EHMT2	CHEMBL601364		DTC
EHMT2	EHMT2	Definite	EHMT2	CHEMBL576409		DTC
EHMT2	EHMT2	Definite	EHMT2	TANSHINONE IIA		DTC
EHMT2	EHMT2	Definite	EHMT2	VANITIOLIDE		DTC
EHMT2	EHMT2	Definite	EHMT2	CEFAZOLIN		DTC
EHMT2	EHMT2	Definite	EHMT2	THYMOL IODIDE		DTC
EHMT2	EHMT2	Definite	EHMT2	MITOXANTRONE HYDROCHLORIDE		DTC
EHMT2	EHMT2	Definite	EHMT2	(S)-WILLARDIINE		DTC
EHMT2	EHMT2	Definite	EHMT2	(-)-EPICATECHIN		DTC
EHMT2	EHMT2	Definite	EHMT2	CHEMBL282199		DTC
EHMT2	EHMT2	Definite	EHMT2	QUINELORANE		DTC
EHMT2	EHMT2	Definite	EHMT2	CHEMBL582496		DTC
EHMT2	EHMT2	Definite	EHMT2	CHEMBL175266		DTC
EHMT2	EHMT2	Definite	EHMT2	QUERCETIN		DTC
EHMT2	EHMT2	Definite	EHMT2	CHEMBL600298		DTC
EHMT2	EHMT2	Definite	EHMT2	3,4-DIHYDROXYPHENYLACETIC ACID		DTC
EHMT2	EHMT2	Definite	EHMT2	TRIFLUOPERAZINE		DTC
EHMT2	EHMT2	Definite	EHMT2	SPERMIDINE		DTC
EHMT2	EHMT2	Definite	EHMT2	CYCLOSERINE		DTC
EHMT2	EHMT2	Definite	EHMT2	GALLAMINE TRIETHIODIDE		DTC
EHMT2	EHMT2	Definite	EHMT2	PROFLAVINE		DTC
EHMT2	EHMT2	Definite	EHMT2	4-DAMP		DTC
EHMT2	EHMT2	Definite	EHMT2	CHEMBL467987		DTC
EHMT2	EHMT2	Definite	EHMT2	METHIMAZOLE		DTC
EHMT2	EHMT2	Definite	EHMT2	CHEMBL1256678		DTC
EHMT2	EHMT2	Definite	EHMT2	DOPAMINE		DTC
EHMT2	EHMT2	Definite	EHMT2	CHEMBL1489812		DTC
EHMT2	EHMT2	Definite	EHMT2	CAFFEIC ACID PHENETHYL ESTER		DTC
EHMT2	EHMT2	Definite	EHMT2	GANAXOLONE		DTC
EHMT2	EHMT2	Definite	EHMT2	NAFTOPIDIL		DTC
EHMT2	EHMT2	Definite	EHMT2	ERGOCALCIFEROL		DTC
EHMT2	EHMT2	Definite	EHMT2	PROROXAN HYDROCHLORIDE		DTC
EHMT2	EHMT2	Definite	EHMT2	KETANSERIN		DTC
EHMT2	EHMT2	Definite	EHMT2	CHEMBL1567571		DTC
EHMT2	EHMT2	Definite	EHMT2	CHEMBL279556		DTC
EHMT2	EHMT2	Definite	EHMT2	FLUPIRTINE		DTC
EHMT2	EHMT2	Definite	EHMT2	ROTTLERIN		DTC
EHMT2	EHMT2	Definite	EHMT2	DAPH		DTC
EHMT2	EHMT2	Definite	EHMT2	CHEMBL1270169		DTC
EHMT2	EHMT2	Definite	EHMT2	IMIDAZOLE ACETIC ACID		DTC
EHMT2	EHMT2	Definite	EHMT2	CHEMBL458328		DTC
EHMT2	EHMT2	Definite	EHMT2	CAPTAN		DTC
EHMT2	EHMT2	Definite	EHMT2	CHEMBL1256484		DTC
EHMT2	EHMT2	Definite	EHMT2	IODOQUINOL		DTC
EHMT2	EHMT2	Definite	EHMT2	NORFLOXACIN		DTC
EHMT2	EHMT2	Definite	EHMT2	CHEMBL578257		DTC
EHMT2	EHMT2	Definite	EHMT2	2-MERCAPTOBENZOTHIAZOLE		DTC
EHMT2	EHMT2	Definite	EHMT2	CLINAFLOXACIN		DTC
EHMT2	EHMT2	Definite	EHMT2	CHEMBL589421		DTC
EHMT2	EHMT2	Definite	EHMT2	CHEMBL493863		DTC
EHMT2	EHMT2	Definite	EHMT2	SPICLOMAZINE		DTC
EHMT2	EHMT2	Definite	EHMT2	CGP-12177		DTC
EHMT2	EHMT2	Definite	EHMT2	CHEMBL316589		DTC
EHMT2	EHMT2	Definite	EHMT2	HYDROQUINONE		DTC
EHMT2	EHMT2	Definite	EHMT2	CEFOTAXIME		DTC
EHMT2	EHMT2	Definite	EHMT2	CHEMBL1256698		DTC
EHMT2	EHMT2	Definite	EHMT2	CALCIMYCIN		DTC
EHMT2	EHMT2	Definite	EHMT2	CHEMBL602807		DTC
EHMT2	EHMT2	Definite	EHMT2	FLUPHENAZINE		DTC
EHMT2	EHMT2	Definite	EHMT2	GUANIDINONALTRINDOLE		DTC
EHMT2	EHMT2	Definite	EHMT2	OSAJIN		DTC
EHMT2	EHMT2	Definite	EHMT2	OXITRIPTAN		DTC
EHMT2	EHMT2	Definite	EHMT2	BIS(DIMETHYLAMINETHIOCARBONYL)MONOSULFIDE		DTC
EHMT2	EHMT2	Definite	EHMT2	CLORINDIONE		DTC
EHMT2	EHMT2	Definite	EHMT2	2-MERCAPTONICOTINIC ACID		DTC
EHMT2	EHMT2	Definite	EHMT2	ADEFOVIR DIPIVOXIL		DTC
EHMT2	EHMT2	Definite	EHMT2	PIRENZEPINE		DTC
EHMT2	EHMT2	Definite	EHMT2	GUANFACINE		DTC
EHMT2	EHMT2	Definite	EHMT2	DOCONEXENT		DTC
EHMT2	EHMT2	Definite	EHMT2	CHEMBL589469		DTC
EHMT2	EHMT2	Definite	EHMT2	ETHACRYNIC ACID		DTC
EHMT2	EHMT2	Definite	EHMT2	CHEMBL601952		DTC
EHMT2	EHMT2	Definite	EHMT2	CHEMBL580076		DTC
EHMT2	EHMT2	Definite	EHMT2	FIDUXOSIN HYDROCHLORIDE		DTC
EHMT2	EHMT2	Definite	EHMT2	CHEMBL546580		DTC
EHMT2	EHMT2	Definite	EHMT2	THEOPHYLLINE		DTC
EHMT2	EHMT2	Definite	EHMT2	LEVONORDEFRIN		DTC
EHMT2	EHMT2	Definite	EHMT2	CHEMBL1160508		DTC
EHMT2	EHMT2	Definite	EHMT2	SEMAXANIB		DTC
EHMT2	EHMT2	Definite	EHMT2	CHEMBL444928		DTC
EHMT2	EHMT2	Definite	EHMT2	PYRAZOPHOS		DTC
EHMT2	EHMT2	Definite	EHMT2	CHEMBL529361		DTC
EHMT2	EHMT2	Definite	EHMT2	DEOXIEPINEPHRINE		DTC
EHMT2	EHMT2	Definite	EHMT2	QUISQUALATE		DTC
EHMT2	EHMT2	Definite	EHMT2	ENOXIMONE		DTC
EHMT2	EHMT2	Definite	EHMT2	CHEMBL1412002		DTC
EHMT2	EHMT2	Definite	EHMT2	CHEMBL235891		DTC
EHMT2	EHMT2	Definite	EHMT2	CHEMBL586937		DTC
EHMT2	EHMT2	Definite	EHMT2	GAMMA-AMINOBUTYRIC ACID		DTC
EHMT2	EHMT2	Definite	EHMT2	SILIBININ		DTC
EHMT2	EHMT2	Definite	EHMT2	PAROXETINE HYDROCHLORIDE		DTC
EHMT2	EHMT2	Definite	EHMT2	CHLORHEXIDINE		DTC
EHMT2	EHMT2	Definite	EHMT2	TELENZEPINE		DTC
EHMT2	EHMT2	Definite	EHMT2	PYRONIN Y		DTC
EHMT2	EHMT2	Definite	EHMT2	CHEMBL586031		DTC
EHMT2	EHMT2	Definite	EHMT2	CLOSANTEL		DTC
EHMT2	EHMT2	Definite	EHMT2	BOPINDOLOL		DTC
EHMT2	EHMT2	Definite	EHMT2	(D)-SERINE		DTC
EHMT2	EHMT2	Definite	EHMT2	CHEMBL581251		DTC
EHMT2	EHMT2	Definite	EHMT2	CHEMBL590691		DTC
EHMT2	EHMT2	Definite	EHMT2	CHEMBL19954		DTC
EHMT2	EHMT2	Definite	EHMT2	E-64C		DTC
EHMT2	EHMT2	Definite	EHMT2	TRIPROLIDINE		DTC
EHMT2	EHMT2	Definite	EHMT2	CHEMBL601547		DTC
EHMT2	EHMT2	Definite	EHMT2	ALTENUSIN		DTC
EHMT2	EHMT2	Definite	EHMT2	CHEMBL1315166		DTC
EHMT2	EHMT2	Definite	EHMT2	HISPIDIN		DTC
EHMT2	EHMT2	Definite	EHMT2	CHEMBL601968		DTC
EHMT2	EHMT2	Definite	EHMT2	GALLAMINE		DTC
EHMT2	EHMT2	Definite	EHMT2	ISOQUERCETIN		DTC
EHMT2	EHMT2	Definite	EHMT2	CHEMBL1256689		DTC
EHMT2	EHMT2	Definite	EHMT2	CHEMBL580183		DTC
EHMT2	EHMT2	Definite	EHMT2	SULFAPYRIDINE		DTC
EHMT2	EHMT2	Definite	EHMT2	CHEMBL601367		DTC
EHMT2	EHMT2	Definite	EHMT2	CHEMBL1256510		DTC
EHMT2	EHMT2	Definite	EHMT2	CHEMBL600306		DTC
EHMT2	EHMT2	Definite	EHMT2	GALLIC ACID		DTC
EHMT2	EHMT2	Definite	EHMT2	CHEMBL598268		DTC
EHMT2	EHMT2	Definite	EHMT2	DIPYRIDYL		DTC
EHMT2	EHMT2	Definite	EHMT2	CHEMBL600173		DTC
EHMT2	EHMT2	Definite	EHMT2	CHOLECALCIFEROL		DTC
EHMT2	EHMT2	Definite	EHMT2	CHEMBL129841		DTC
EHMT2	EHMT2	Definite	EHMT2	THIRAM		DTC
EHMT2	EHMT2	Definite	EHMT2	SULFADIAZINE, SILVER		DTC
EHMT2	EHMT2	Definite	EHMT2	CHEMBL1256776		DTC
EHMT2	EHMT2	Definite	EHMT2	CHEMBL72365		DTC
EHMT2	EHMT2	Definite	EHMT2	CHEMBL583558		DTC
EHMT2	EHMT2	Definite	EHMT2	FENOLDOPAM		DTC
EHMT2	EHMT2	Definite	EHMT2	PIRETANIDE		DTC
EHMT2	EHMT2	Definite	EHMT2	CHEMBL580851		DTC
EHMT2	EHMT2	Definite	EHMT2	CHEMBL537045		DTC
EHMT2	EHMT2	Definite	EHMT2	CHEMBL1312050		DTC
EHMT2	EHMT2	Definite	EHMT2	CHEMBL601137		DTC
EHMT2	EHMT2	Definite	EHMT2	LUTEOLIN		DTC
EHMT2	EHMT2	Definite	EHMT2	EBSELEN		DTC
EHMT2	EHMT2	Definite	EHMT2	CHEMBL592124		DTC
EHMT2	EHMT2	Definite	EHMT2	ETHOPROPAZINE		DTC
EHMT2	EHMT2	Definite	EHMT2	CEFOTETAN		DTC
EHMT2	EHMT2	Definite	EHMT2	CYSTEAMINE		DTC
EHMT2	EHMT2	Definite	EHMT2	CHEMBL591864		DTC
EHMT2	EHMT2	Definite	EHMT2	N,N-HEXAMETHYLENEAMILORIDE		DTC
EHMT2	EHMT2	Definite	EHMT2	2-METHOXYESTRADIOL		DTC
EHMT2	EHMT2	Definite	EHMT2	LEVISOPRENALINE		DTC
EHMT2	EHMT2	Definite	EHMT2	CHEMBL43078		DTC
EHMT2	EHMT2	Definite	EHMT2	TRIMETREXATE		DTC
EHMT2	EHMT2	Definite	EHMT2	CHEMBL1369632		DTC
EHMT2	EHMT2	Definite	EHMT2	CARUBICIN		DTC
EHMT2	EHMT2	Definite	EHMT2	CHEMBL421215		DTC
EHMT2	EHMT2	Definite	EHMT2	CHEMBL590949		DTC
EHMT2	EHMT2	Definite	EHMT2	CHEMBL35354		DTC
EHMT2	EHMT2	Definite	EHMT2	CHEMBL578896		DTC
EHMT2	EHMT2	Definite	EHMT2	CHEMBL592834		DTC
EHMT2	EHMT2	Definite	EHMT2	DEMECLOCYCLINE HYDROCHLORIDE		DTC
EHMT2	EHMT2	Definite	EHMT2	CHEMBL584868		DTC
EHMT2	EHMT2	Definite	EHMT2	TREQUINSIN HYDROCHLORIDE		DTC
EHMT2	EHMT2	Definite	EHMT2	CHEMBL602408		DTC
EHMT2	EHMT2	Definite	EHMT2	CHEMBL585269		DTC
EHMT2	EHMT2	Definite	EHMT2	CHEMBL297784		DTC
EHMT2	EHMT2	Definite	EHMT2	CHEMBL601744		DTC
EHMT2	EHMT2	Definite	EHMT2	CHEMBL1256984		DTC
EHMT2	EHMT2	Definite	EHMT2	CHEMBL580816		DTC
EHMT2	EHMT2	Definite	EHMT2	CHEMBL529741		DTC
EHMT2	EHMT2	Definite	EHMT2	RESVERATROL		DTC
EHMT2	EHMT2	Definite	EHMT2	CHEMBL1546228		DTC
EHMT2	EHMT2	Definite	EHMT2	PYRITHIONE		DTC
EHMT2	EHMT2	Definite	EHMT2	CHEMBL600738		DTC
EHMT2	EHMT2	Definite	EHMT2	CHEMBL578675		DTC
EHMT2	EHMT2	Definite	EHMT2	CHEMBL388979		DTC
EHMT2	EHMT2	Definite	EHMT2	TRITIOZINE		DTC
EHMT2	EHMT2	Definite	EHMT2	GYKI-52466		DTC
EHMT2	EHMT2	Definite	EHMT2	ZAPRINAST		DTC
EHMT2	EHMT2	Definite	EHMT2	EPIGALOCATECHIN GALLATE		DTC
EHMT2	EHMT2	Definite	EHMT2	NIMUSTINE		DTC
EHMT2	EHMT2	Definite	EHMT2	CHEMBL275177		DTC
EHMT2	EHMT2	Definite	EHMT2	(4-CHLOROPHENYL)(MORPHOLINO)METHANETHIONE		DTC
EHMT2	EHMT2	Definite	EHMT2	HYDROXYZINE PAMOATE		DTC
EHMT2	EHMT2	Definite	EHMT2	ETHAMSYLATE		DTC
EHMT2	EHMT2	Definite	EHMT2	TYRPHOSTIN 25		DTC
EHMT2	EHMT2	Definite	EHMT2	AMSACRINE HYDROCHLORIDE		DTC
EHMT2	EHMT2	Definite	EHMT2	PROPRANOLOL		DTC
EHMT2	EHMT2	Definite	EHMT2	ENCLOMIPHENE CITRATE		DTC
EHMT2	EHMT2	Definite	EHMT2	CHEMBL591630		DTC
EHMT2	EHMT2	Definite	EHMT2	CHEMBL525888		DTC
EHMT2	EHMT2	Definite	EHMT2	DILTIAZEM HYDROCHLORIDE		DTC
EHMT2	EHMT2	Definite	EHMT2	PROMETHAZINE		DTC
EHMT2	EHMT2	Definite	EHMT2	CHEMBL1256876		DTC
EHMT2	EHMT2	Definite	EHMT2	HISTIDINE		DTC
EHMT2	EHMT2	Definite	EHMT2	DOCEBENONE		DTC
EHMT2	EHMT2	Definite	EHMT2	CHEMBL605959		DTC
EHMT2	EHMT2	Definite	EHMT2	PIRENZEPINE HYDROCHLORIDE		DTC
EHMT2	EHMT2	Definite	EHMT2	CHEMBL451722		DTC
EHMT2	EHMT2	Definite	EHMT2	DIHYDREXIDINE HYDROCHLORIDE		DTC
EHMT2	EHMT2	Definite	EHMT2	RESERPINE		DTC
EHMT2	EHMT2	Definite	EHMT2	ICRF-193		DTC
EHMT2	EHMT2	Definite	EHMT2	DEPHOSTATIN		DTC
EHMT2	EHMT2	Definite	EHMT2	METAPHIT METHANESULFONATE		DTC
EHMT2	EHMT2	Definite	EHMT2	CHEMBL534214		DTC
EHMT2	EHMT2	Definite	EHMT2	INDIRUBIN-3-MONOXIME		DTC
EHMT2	EHMT2	Definite	EHMT2	CHEMBL603024		DTC
EHMT2	EHMT2	Definite	EHMT2	HELENALIN		DTC
EHMT2	EHMT2	Definite	EHMT2	CHLOROQUINE		DTC
EHMT2	EHMT2	Definite	EHMT2	ELLIPTECINE		DTC
EHMT2	EHMT2	Definite	EHMT2	CHAETOCIN		DTC
EHMT2	EHMT2	Definite	EHMT2	CHEMBL607309		DTC
EHMT2	EHMT2	Definite	EHMT2	HARPAGOSIDE		DTC
EHMT2	EHMT2	Definite	EHMT2	METIZOLINE		DTC
EHMT2	EHMT2	Definite	EHMT2	CHEMBL227959		DTC
EHMT2	EHMT2	Definite	EHMT2	NISOLDIPINE		DTC
EHMT2	EHMT2	Definite	EHMT2	E319		DTC
EHMT2	EHMT2	Definite	EHMT2	ISOCONAZOLE		DTC
EHMT2	EHMT2	Definite	EHMT2	CHEMBL579742		DTC
EHMT2	EHMT2	Definite	EHMT2	CHEMBL586029		DTC
EHMT2	EHMT2	Definite	EHMT2	NICOTINE BITARTRATE		DTC
EHMT2	EHMT2	Definite	EHMT2	CHEMBL139935		DTC
EHMT2	EHMT2	Definite	EHMT2	PROROXAN		DTC
EHMT2	EHMT2	Definite	EHMT2	BROMOCRIPTINE		DTC
EHMT2	EHMT2	Definite	EHMT2	CHEMBL590706		DTC
EHMT2	EHMT2	Definite	EHMT2	AURINTRICARBOXYLIC ACID		DTC
EHMT2	EHMT2	Definite	EHMT2	QUINACRINE DIHYDROCHLORIDE		DTC
EHMT2	EHMT2	Definite	EHMT2	SKF-38393		DTC
EHMT2	EHMT2	Definite	EHMT2	METHOTREXATE		DTC
EHMT2	EHMT2	Definite	EHMT2	PHENANTHROLINE		DTC
EHMT2	EHMT2	Definite	EHMT2	CHEMBL1079460		DTC
EHMT2	EHMT2	Definite	EHMT2	CHEMBL322970		DTC
EHMT2	EHMT2	Definite	EHMT2	DEFERIPRONE		DTC
EHMT2	EHMT2	Definite	EHMT2	SULINDAC SULFOXIDE		DTC
EHMT2	EHMT2	Definite	EHMT2	N-METHYLHISTAMINE		DTC
EHMT2	EHMT2	Definite	EHMT2	METRAZOLINE OXALATE		DTC
EHMT2	EHMT2	Definite	EHMT2	CHEMBL1256396		DTC
EHMT2	EHMT2	Definite	EHMT2	LAVENDUSTIN C		DTC
EHMT2	EHMT2	Definite	EHMT2	CHEMBL1256738		DTC
EHMT2	EHMT2	Definite	EHMT2	TOLFENAMIC ACID		DTC
EHMT2	EHMT2	Definite	EHMT2	OXOTREMORINE METHIODIDE		DTC
EHMT2	EHMT2	Definite	EHMT2	CHEMBL492528		DTC
EHMT2	EHMT2	Definite	EHMT2	TAMOXIFEN CITRATE		DTC
EHMT2	EHMT2	Definite	EHMT2	MESORIDAZINE		DTC
EHMT2	EHMT2	Definite	EHMT2	CHEMBL387632		DTC
EHMT2	EHMT2	Definite	EHMT2	CHEMBL1728978		DTC
EHMT2	EHMT2	Definite	EHMT2	CHEMBL1537417		DTC
EHMT2	EHMT2	Definite	EHMT2	CAPTOPRIL		DTC
EHMT2	EHMT2	Definite	EHMT2	CHEMBL77387		DTC
EHMT2	EHMT2	Definite	EHMT2	SALICYLHYDROXAMIC ACID		DTC
EHMT2	EHMT2	Definite	EHMT2	CGS-15943		DTC
EHMT2	EHMT2	Definite	EHMT2	SYROSINGOPINE		DTC
EHMT2	EHMT2	Definite	EHMT2	URAPIDIL		DTC
EHMT2	EHMT2	Definite	EHMT2	CHEMBL533577		DTC
EHMT2	EHMT2	Definite	EHMT2	CHEMBL538104		DTC
EHMT2	EHMT2	Definite	EHMT2	CHEMBL189753		DTC
EHMT2	EHMT2	Definite	EHMT2	NICARDIPINE		DTC
EHMT2	EHMT2	Definite	EHMT2	DAUNORUBICIN HYDROCHLORIDE		DTC
EHMT2	EHMT2	Definite	EHMT2	PUTRESCINE DIHYDROCHLORIDE		DTC
EHMT2	EHMT2	Definite	EHMT2	ZIPRASIDONE		DTC
EHMT2	EHMT2	Definite	EHMT2	DIBROMOTYROSINE		DTC
EHMT2	EHMT2	Definite	EHMT2	4-CHLOROMERCURIBENZOIC ACID		DTC
EHMT2	EHMT2	Definite	EHMT2	CHEMBL275311		DTC
EHMT2	EHMT2	Definite	EHMT2	HYPOTAURINE		DTC
EHMT2	EHMT2	Definite	EHMT2	CHEMBL522983		DTC
EHMT2	EHMT2	Definite	EHMT2	CYCLOPIAZONIC ACID		DTC
EHMT2	EHMT2	Definite	EHMT2	1,2-NAPHTHOQUINONE		DTC
EHMT2	EHMT2	Definite	EHMT2	TYRPHOSTIN 23		DTC
EHMT2	EHMT2	Definite	EHMT2	CHEMBL398765		DTC
EHMT2	EHMT2	Definite	EHMT2	CHEMBL605003		DTC
EHMT2	EHMT2	Definite	EHMT2	MIFEPRISTONE		DTC
EHMT2	EHMT2	Definite	EHMT2	FLUMEQUINE		DTC
EHMT2	EHMT2	Definite	EHMT2	CHEMBL589715		DTC
EHMT2	EHMT2	Definite	EHMT2	CEPHAPIRIN SODIUM		DTC
EHMT2	EHMT2	Definite	EHMT2	CHEMBL588038		DTC
EHMT2	EHMT2	Definite	EHMT2	2'-HYDROXYCHALCONE		DTC
EHMT2	EHMT2	Definite	EHMT2	CHEMBL585628		DTC
EHMT2	EHMT2	Definite	EHMT2	CHEMBL534288		DTC
EHMT2	EHMT2	Definite	EHMT2	TYRPHOSTIN 51		DTC
EHMT2	EHMT2	Definite	EHMT2	CEFACLOR		DTC
EHMT2	EHMT2	Definite	EHMT2	CHEMBL26320		DTC
EHMT2	EHMT2	Definite	EHMT2	ACID BLUE 129		DTC
EHMT2	EHMT2	Definite	EHMT2	TYRPHOSTIN A9		DTC
EHMT2	EHMT2	Definite	EHMT2	TRICHOSTATIN		DTC
EHMT2	EHMT2	Definite	EHMT2	COCLAURINE		DTC
EHMT2	EHMT2	Definite	EHMT2	HARMOL		DTC
EHMT2	EHMT2	Definite	EHMT2	CHELERYTHRINE CHLORIDE		DTC
EHMT2	EHMT2	Definite	EHMT2	HYDRALAZINE		DTC
EHMT2	EHMT2	Definite	EHMT2	SYMCLOSENE		DTC
EHMT2	EHMT2	Definite	EHMT2	CHEMBL1576310		DTC
EHMT2	EHMT2	Definite	EHMT2	CITALOPRAM		DTC
EHMT2	EHMT2	Definite	EHMT2	MAPROTILINE HYDROCHLORIDE		DTC
EHMT2	EHMT2	Definite	EHMT2	PERAZINE		DTC
EHMT2	EHMT2	Definite	EHMT2	2-PICOLINIC ACID		DTC
EHMT2	EHMT2	Definite	EHMT2	DECYLUBIQUINONE		DTC
EHMT2	EHMT2	Definite	EHMT2	CHEMBL104264		DTC
EHMT2	EHMT2	Definite	EHMT2	CHEMBL589670		DTC
EHMT2	EHMT2	Definite	EHMT2	CAFFEIC ACID		DTC
EHMT2	EHMT2	Definite	EHMT2	1-AMINOCYCLOPROPANE CARBOXYLIC ACID		DTC
EHMT2	EHMT2	Definite	EHMT2	CHEMBL127421		DTC
EHMT2	EHMT2	Definite	EHMT2	CHEMBL582478		DTC
EHMT2	EHMT2	Definite	EHMT2	DIPYRIDAMOLE		DTC
EHMT2	EHMT2	Definite	EHMT2	LOVASTATIN		DTC
EHMT2	EHMT2	Definite	EHMT2	CHEMBL602923		DTC
EHMT2	EHMT2	Definite	EHMT2	CHEMBL1385558		DTC
EHMT2	EHMT2	Definite	EHMT2	NOREPINEPHRINE		DTC
EHMT2	EHMT2	Definite	EHMT2	CHEMBL321585		DTC
EHMT2	EHMT2	Definite	EHMT2	CHEMBL1256885		DTC
EHMT2	EHMT2	Definite	EHMT2	ERBSTATIN		DTC
EHMT2	EHMT2	Definite	EHMT2	PICEATANNOL		DTC
EHMT2	EHMT2	Definite	EHMT2	ICILLIN		DTC
EHMT2	EHMT2	Definite	EHMT2	CHEMBL601605		DTC
EHMT2	EHMT2	Definite	EHMT2	CHEMBL547833		DTC
EHMT2	EHMT2	Definite	EHMT2	CHEMBL1510164		DTC
EHMT2	EHMT2	Definite	EHMT2	DACTINOMYCIN		DTC
EHMT2	EHMT2	Definite	EHMT2	FLUNARIZINE		DTC
EHMT2	EHMT2	Definite	EHMT2	HINOKITIOL		DTC
EHMT2	EHMT2	Definite	EHMT2	BAY-11-7085		DTC
EHMT2	EHMT2	Definite	EHMT2	DIHYDROXIDINE		DTC
EHMT2	EHMT2	Definite	EHMT2	METHAZOLAMIDE		DTC
EHMT2	EHMT2	Definite	EHMT2	DIHYDRALAZINE		DTC
EHMT2	EHMT2	Definite	EHMT2	CHEMBL118378		DTC
EHMT2	EHMT2	Definite	EHMT2	QUINPIROLE		DTC
EHMT2	EHMT2	Definite	EHMT2	LIPOIC ACID, ALPHA		DTC
EHMT2	EHMT2	Definite	EHMT2	CHEMBL1451216		DTC
EHMT2	EHMT2	Definite	EHMT2	ISOETHARINE		DTC
EHMT2	EHMT2	Definite	EHMT2	CHEMBL338115		DTC
EHMT2	EHMT2	Definite	EHMT2	CHEMBL1256174		DTC
EHMT2	EHMT2	Definite	EHMT2	CORYNANTHEINE		DTC
EHMT2	EHMT2	Definite	EHMT2	CHEMBL2374078		DTC
EHMT2	EHMT2	Definite	EHMT2	CHEMBL80155		DTC
EHMT2	EHMT2	Definite	EHMT2	CHEMBL597246		DTC
EHMT2	EHMT2	Definite	EHMT2	RANITIDINE		DTC
EHMT2	EHMT2	Definite	EHMT2	SERTACONAZOLE NITRATE		DTC
EHMT2	EHMT2	Definite	EHMT2	CHEMBL328710		DTC
EHMT2	EHMT2	Definite	EHMT2	CHEMBL313938		DTC
EHMT2	EHMT2	Definite	EHMT2	CHEMBL584248		DTC
EHMT2	EHMT2	Definite	EHMT2	ESTRADIOL		DTC
EHMT2	EHMT2	Definite	EHMT2	BROMOCRIPTINE MESYLATE		DTC
EHMT2	EHMT2	Definite	EHMT2	PROMAZINE HYDROCHLORIDE		DTC
EHMT2	EHMT2	Definite	EHMT2	CHEMBL1408276		DTC
EHMT2	EHMT2	Definite	EHMT2	CHEMBL584635		DTC
EHMT2	EHMT2	Definite	EHMT2	SHIKONIN		DTC
EHMT2	EHMT2	Definite	EHMT2	TINORIDINE		DTC
EHMT2	EHMT2	Definite	EHMT2	CLOFAZIMINE		DTC
EHMT2	EHMT2	Definite	EHMT2	CYCLOBENZAPRINE HYDROCHLORIDE		DTC
EHMT2	EHMT2	Definite	EHMT2	RUFLOXACIN		DTC
EHMT2	EHMT2	Definite	EHMT2	CHEMBL531322		DTC
EHMT2	EHMT2	Definite	EHMT2	CHEMBL602776		DTC
EHMT2	EHMT2	Definite	EHMT2	CHEMBL580340		DTC
EHMT2	EHMT2	Definite	EHMT2	CHEMBL591404		DTC
EHMT2	EHMT2	Definite	EHMT2	3,5-DINITROCATECHOL (OR-486)		DTC
EHMT2	EHMT2	Definite	EHMT2	SANGUINARIUM		DTC
EHMT2	EHMT2	Definite	EHMT2	SEROTONIN HYDROCHLORIDE		DTC
EHMT2	EHMT2	Definite	EHMT2	DIPHOSPHOMETHYLPHOSPHONIC ACID ADENOSYL ESTER		DTC
EHMT2	EHMT2	Definite	EHMT2	CHEMBL553503		DTC
EHMT2	EHMT2	Definite	EHMT2	CHEMBL530698		DTC
EHMT2	EHMT2	Definite	EHMT2	CHEMBL258756		DTC
EHMT2	EHMT2	Definite	EHMT2	STREPTOMYCIN		DTC
EHMT2	EHMT2	Definite	EHMT2	LINSIDOMINE		DTC
EHMT2	EHMT2	Definite	EHMT2	THIORIDAZINE		DTC
EHMT2	EHMT2	Definite	EHMT2	SARCOLYSIN		DTC
EHMT2	EHMT2	Definite	EHMT2	CEPHALOTHIN		DTC
EHMT2	EHMT2	Definite	EHMT2	PYRAZINOIC ACID		DTC
EHMT2	EHMT2	Definite	EHMT2	BETAINE HYDROCHLORIDE		DTC
EHMT2	EHMT2	Definite	EHMT2	PAXILLINE		DTC
EHMT2	EHMT2	Definite	EHMT2	CHEMBL585656		DTC
EHMT2	EHMT2	Definite	EHMT2	CHEMBL590672		DTC
EHMT2	EHMT2	Definite	EHMT2	CHEMBL590666		DTC
EHMT2	EHMT2	Definite	EHMT2	DIAZOXIDE		DTC
EHMT2	EHMT2	Definite	EHMT2	LEVODOPA		DTC
EHMT2	EHMT2	Definite	EHMT2	CEFAMANDOLE SODIUM		DTC
EHMT2	EHMT2	Definite	EHMT2	ALITRETINOIN		DTC
EHMT2	EHMT2	Definite	EHMT2	VITAMIN B2		DTC
EHMT2	EHMT2	Definite	EHMT2	EMODIN		DTC
EHMT2	EHMT2	Definite	EHMT2	NICLOSAMIDE		DTC
EHMT2	EHMT2	Definite	EHMT2	DIOTYROSINE		DTC
EHMT2	EHMT2	Definite	EHMT2	THIETHYLPERAZINE MALATE		DTC
EHMT2	EHMT2	Definite	EHMT2	CHEMBL589734		DTC
EHMT2	EHMT2	Definite	EHMT2	CYSTAMINE DIHYDROCHLORIDE		DTC
EHMT2	EHMT2	Definite	EHMT2	BENZOPHENONE-THIOSEMICARBAZONE		DTC
EHMT2	EHMT2	Definite	EHMT2	CHEMBL578741		DTC
EHMT2	EHMT2	Definite	EHMT2	CIANIDANOL		DTC
EHMT2	EHMT2	Definite	EHMT2	CEPHALOTHIN SODIUM		DTC
EHMT2	EHMT2	Definite	EHMT2	5-BENZYLOXYTRYPTAMINE		DTC
EHMT2	EHMT2	Definite	EHMT2	CHEMBL343002		DTC
EHMT2	EHMT2	Definite	EHMT2	GLAUCINE METHIODIDE		DTC
EHMT2	EHMT2	Definite	EHMT2	DEQUALINIUM CHLORIDE		DTC
EHMT2	EHMT2	Definite	EHMT2	CITICOLINE SODIUM		DTC
EHMT2	EHMT2	Definite	EHMT2	CHEMBL505670		DTC
EHMT2	EHMT2	Definite	EHMT2	CAPSAZEPINE		DTC
EHMT2	EHMT2	Definite	EHMT2	TOLAZAMIDE		DTC
EHMT2	EHMT2	Definite	EHMT2	ISOETHARINE MESYLATE		DTC
EHMT2	EHMT2	Definite	EHMT2	CHEMBL1605629		DTC
EHMT2	EHMT2	Definite	EHMT2	LONIDAMINE		DTC
EHMT2	EHMT2	Definite	EHMT2	CHEMBL1306524		DTC
EHMT2	EHMT2	Definite	EHMT2	CLOMETHIAZOLE		DTC
EHMT2	EHMT2	Definite	EHMT2	WORTMANNIN		DTC
EHMT2	EHMT2	Definite	EHMT2	CHEMBL211670		DTC
EHMT2	EHMT2	Definite	EHMT2	HEMICHOLINIUM-3		DTC
EHMT2	EHMT2	Definite	EHMT2	ACETAMIDE		DTC
EHMT2	EHMT2	Definite	EHMT2	MESALAMINE		DTC
EHMT2	EHMT2	Definite	EHMT2	CHEMBL599013		DTC
EHMT2	EHMT2	Definite	EHMT2	AMARANTH		DTC
EHMT2	EHMT2	Definite	EHMT2	CHEMBL533954		DTC
EHMT2	EHMT2	Definite	EHMT2	CHEMBL88553		DTC
EHMT2	EHMT2	Definite	EHMT2	CHEMBL53898		DTC
EHMT2	EHMT2	Definite	EHMT2	LYCOPENE		DTC
EHMT2	EHMT2	Definite	EHMT2	CGP-71683A		DTC
EHMT2	EHMT2	Definite	EHMT2	PYRITHIONE ZINC		DTC
EHMT2	EHMT2	Definite	EHMT2	RAZOXANE		DTC
EHMT2	EHMT2	Definite	EHMT2	CHEMBL1363249		DTC
EHMT2	EHMT2	Definite	EHMT2	CHEMBL602969		DTC
EHMT2	EHMT2	Definite	EHMT2	MYRICETIN		DTC
EHMT2	EHMT2	Definite	EHMT2	CYCLIC ADENOSINE MONOPHOSPHATE		DTC
EHMT2	EHMT2	Definite	EHMT2	RESCINNAMINE		DTC
EHMT2	EHMT2	Definite	EHMT2	CHEMBL476025		DTC
EHMT2	EHMT2	Definite	EHMT2	CHEMBL589479		DTC
EHMT2	EHMT2	Definite	EHMT2	CHEMBL32307		DTC
EHMT2	EHMT2	Definite	EHMT2	OMEPRAZOLE		DTC
EHMT2	EHMT2	Definite	EHMT2	CHEMBL1504679		DTC
EHMT2	EHMT2	Definite	EHMT2	TROLOX		DTC
EHMT2	EHMT2	Definite	EHMT2	DIMERCAPROL		DTC
EHMT2	EHMT2	Definite	EHMT2	CHEMBL609036		DTC
EHMT2	EHMT2	Definite	EHMT2	PROTOAPIGENONE		DTC
EHMT2	EHMT2	Definite	EHMT2	IMETIT DIHYDROBROMIDE		DTC
EHMT2	EHMT2	Definite	EHMT2	ARACHIDONOYL DOPAMINE		DTC
EHMT2	EHMT2	Definite	EHMT2	CHEMBL411085		DTC
AGER	AGER	Definite	AGER	PYRIDOXAMINE		TTD
AGER	AGER	Definite	AGER	AZELIRAGON	antagonist	GuideToPharmacology
NOTCH4	NOTCH4	Definite	NOTCH4	RG-4733	inhibitor	MyCancerGenome
NOTCH4	NOTCH4	Definite	NOTCH4	NIROGACESTAT	inhibitor	MyCancerGenome
NOTCH4	NOTCH4	Definite	NOTCH4	CRENIGACESTAT		TTD
NOTCH4	NOTCH4	Definite	NOTCH4	ALLOPURINOL		PharmGKB	29193002
HLA-DRA	HLA-DRA	Definite	HLA-DRA	AMOXICILLIN		PharmGKB	30664875
HLA-DRA	HLA-DRA	Definite	HLA-DRA	CLAVULANIC ACID		PharmGKB	30664875
HLA-DRA	HLA-DRA	Definite	HLA-DRA	PEMBROLIZUMAB		CIViC	26822383
HLA-DRA	HLA-DRA	Definite	HLA-DRA	NIVOLUMAB		CIViC	26822383
HLA-DRA	HLA-DRA	Definite	HLA-DRA	FLOXACILLIN		PharmGKB	30664875
HLA-DRA	HLA-DRA	Definite	HLA-DRA	ATEZOLIZUMAB		CIViC	26822383
HLA-DRB1	HLA-DRB1	Definite	HLA-DRB1	FLUPIRTINE		PharmGKB	26959717
HLA-DRB1	HLA-DRB1	Definite	HLA-DRB1	FLUVASTATIN		PharmGKB	27839692
HLA-DRB1	HLA-DRB1	Definite	HLA-DRB1	METHIMAZOLE		PharmGKB
HLA-DRB1	HLA-DRB1	Definite	HLA-DRB1	ASPIRIN		PharmGKB	15784113|19392989
HLA-DRB1	HLA-DRB1	Definite	HLA-DRB1	LYM-1		ChemblInteractions|TTD
HLA-DRB1	HLA-DRB1	Definite	HLA-DRB1	EFAVIRENZ		PharmGKB	18301070
HLA-DRB1	HLA-DRB1	Definite	HLA-DRB1	INFLIXIMAB		PharmGKB
HLA-DRB1	HLA-DRB1	Definite	HLA-DRB1	ADALIMUMAB		PharmGKB
HLA-DRB1	HLA-DRB1	Definite	HLA-DRB1	PROPYLTHIOURACIL		PharmGKB
HLA-DRB1	HLA-DRB1	Definite	HLA-DRB1	LAPATINIB		PharmGKB|FDA	24687830|28786423
HLA-DRB1	HLA-DRB1	Definite	HLA-DRB1	PITAVASTATIN		PharmGKB	27839692
HLA-DRB1	HLA-DRB1	Definite	HLA-DRB1	SIMVASTATIN		PharmGKB	27839692
HLA-DRB1	HLA-DRB1	Definite	HLA-DRB1	DABRAFENIB		PharmGKB	27023328
HLA-DRB1	HLA-DRB1	Definite	HLA-DRB1	PRAVASTATIN		PharmGKB	27839692
HLA-DRB1	HLA-DRB1	Definite	HLA-DRB1	BUCILLAMINE		PharmGKB
HLA-DRB1	HLA-DRB1	Definite	HLA-DRB1	ATORVASTATIN		PharmGKB	27839692
HLA-DRB1	HLA-DRB1	Definite	HLA-DRB1	ASPARAGINASE		PharmGKB	24970932|25987655
HLA-DRB1	HLA-DRB1	Definite	HLA-DRB1	CARBIMAZOLE		PharmGKB
HLA-DRB1	HLA-DRB1	Definite	HLA-DRB1	DAPSONE		PharmGKB	29233746
HLA-DRB1	HLA-DRB1	Definite	HLA-DRB1	LUMIRACOXIB		PharmGKB	20639878
HLA-DRB1	HLA-DRB1	Definite	HLA-DRB1	CARBAMAZEPINE		PharmGKB	24399721|23830818
HLA-DRB1	HLA-DRB1	Definite	HLA-DRB1	CLAVULANIC ACID		PharmGKB	20800921|10535882|30664875
HLA-DRB1	HLA-DRB1	Definite	HLA-DRB1	ETANERCEPT		PharmGKB
HLA-DRB1	HLA-DRB1	Definite	HLA-DRB1	OXCARBAZEPINE		PharmGKB	27666425
HLA-DRB1	HLA-DRB1	Definite	HLA-DRB1	LAMOTRIGINE		PharmGKB	19668019
HLA-DRB1	HLA-DRB1	Definite	HLA-DRB1	FLOXACILLIN		PharmGKB	30664875
HLA-DRB1	HLA-DRB1	Definite	HLA-DRB1	ROSUVASTATIN		PharmGKB	27839692
HLA-DRB1	HLA-DRB1	Definite	HLA-DRB1	AMOXICILLIN		PharmGKB	20800921|10535882|30664875
HLA-DRB1	HLA-DRB1	Definite	HLA-DRB1	MERCAPTOPURINE		PharmGKB	25217962
HLA-DRB1	HLA-DRB1	Definite	HLA-DRB1	TICLOPIDINE		PharmGKB	17339877
HLA-DRB1	HLA-DRB1	Definite	HLA-DRB1	AZATHIOPRINE		PharmGKB	25217962
HLA-DQA1	HLA-DQA1	Definite	HLA-DQA1	MERCAPTOPURINE		PharmGKB	25217962
HLA-DQA1	HLA-DQA1	Definite	HLA-DQA1	LAPATINIB		PharmGKB|FDA	24687830|21245432
HLA-DQA1	HLA-DQA1	Definite	HLA-DQA1	AZATHIOPRINE		PharmGKB	25217962
HLA-DQA1	HLA-DQA1	Definite	HLA-DQA1	LUMIRACOXIB		PharmGKB	20639878
HLA-DQB1	HLA-DQB1	Definite	HLA-DQB1	TICLOPIDINE		PharmGKB	17339877
HLA-DQB1	HLA-DQB1	Definite	HLA-DQB1	CARBAMAZEPINE		PharmGKB	24399721
HLA-DQB1	HLA-DQB1	Definite	HLA-DQB1	AMOXICILLIN		PharmGKB	10535882|30664875
HLA-DQB1	HLA-DQB1	Definite	HLA-DQB1	FLOXACILLIN		PharmGKB	30664875
HLA-DQB1	HLA-DQB1	Definite	HLA-DQB1	ACETAMINOPHEN		PharmGKB	21545408
HLA-DQB1	HLA-DQB1	Definite	HLA-DQB1	CLAVULANIC ACID		PharmGKB	10535882|30664875
HLA-DQB1	HLA-DQB1	Definite	HLA-DQB1	BUCILLAMINE		PharmGKB
HLA-DQB1	HLA-DQB1	Definite	HLA-DQB1	FLUPIRTINE		PharmGKB	26959717
HLA-DQB1	HLA-DQB1	Definite	HLA-DQB1	NEVIRAPINE		PharmGKB
HLA-DQB1	HLA-DQB1	Definite	HLA-DQB1	LAMOTRIGINE		PharmGKB	19668019
HLA-DQB1	HLA-DQB1	Definite	HLA-DQB1	LUMIRACOXIB		PharmGKB	20639878
HLA-DQB1	HLA-DQB1	Definite	HLA-DQB1	ASPIRIN		PharmGKB	26366802|15784113|19392989
BRD2	BRD2	Definite	BRD2	TRIAZOLAM		DTC	22137933
BRD2	BRD2	Definite	BRD2	MOLIBRESIB	inhibitor	GuideToPharmacology
BRD2	BRD2	Definite	BRD2	ALPRAZOLAM		DTC	22137933
BRD2	BRD2	Definite	BRD2	ACETAMINOPHEN		DTC	22136404
BRD2	BRD2	Definite	BRD2	CHEMBL52030		DTC	22137933
BRD2	BRD2	Definite	BRD2	BIRABRESIB		TTD
BRD2	BRD2	Definite	BRD2	CHEMBL2153434	inhibitor	GuideToPharmacology
BRD2	BRD2	Definite	BRD2	MIDAZOLAM		DTC	22137933
BRD2	BRD2	Definite	BRD2	ABBV-744		TTD
TAPBP	TAPBP	Definite	TAPBP	ASPIRIN		PharmGKB	23736108
BAK1	BAK1	Definite	BAK1	KERACYANIN		DTC	17360708
MAD1L1	MAD1L1	Definite	MAD1L1	CARBOPLATIN		PharmGKB	23407047
MAD1L1	MAD1L1	Definite	MAD1L1	PACLITAXEL		PharmGKB	23407047
FTSJ2	MRM2	Definite	MRM2	PLAZOMICIN		TTD
GRM3	GRM3	Definite	GRM3	LY2969822	agonist	ChemblInteractions
GRM3	GRM3	Definite	GRM3	LY404039	agonist	ChemblInteractions|TTD
GRM3	GRM3	Definite	GRM3	DIACETYLMORPHINE		PharmGKB
GRM3	GRM3	Definite	GRM3	EGLUMEGAD	agonist	GuideToPharmacology
GRM3	GRM3	Definite	GRM3	POMAGLUMETAD METHIONIL	agonist	ChemblInteractions
GRM3	GRM3	Definite	GRM3	DECOGLURANT	modulator	ChemblInteractions|TTD	23976856
GRM3	GRM3	Definite	GRM3	SPAGLUMIC ACID	agonist	GuideToPharmacology
GRM3	GRM3	Definite	GRM3	RISPERIDONE		PharmGKB	19451915
ABCB1	ABCB1	Definite	ABCB1	DAPTOMYCIN		PharmGKB	25239468
ABCB1	ABCB1	Definite	ABCB1	PACLITAXEL		DTC|NCI|CIViC	16289636|15876424|16467099
ABCB1	ABCB1	Definite	ABCB1	AGOMELATINE		PharmGKB
ABCB1	ABCB1	Definite	ABCB1	NICARDIPINE		PharmGKB
ABCB1	ABCB1	Definite	ABCB1	DEXTROMETHORPHAN		NCI	15582917
ABCB1	ABCB1	Definite	ABCB1	VINBLASTINE		DTC	21348461|20363635
ABCB1	ABCB1	Definite	ABCB1	2'-HYDROXYCHALCONE		DTC	22112540
ABCB1	ABCB1	Definite	ABCB1	RANOLAZINE		PharmGKB	24433361
ABCB1	ABCB1	Definite	ABCB1	SPIRONOLACTONE		NCI|PharmGKB	16740618
ABCB1	ABCB1	Definite	ABCB1	TESMILIFENE	inducer	TdgClinicalTrial	16413681|10755318
ABCB1	ABCB1	Definite	ABCB1	PROPRANOLOL		NCI|PharmGKB	15023456
ABCB1	ABCB1	Definite	ABCB1	HETEROCODEINE		DTC	18311899
ABCB1	ABCB1	Definite	ABCB1	RISPERIDONE		PharmGKB	29723928|24589909|26129906|29443543|19997080|23609392
ABCB1	ABCB1	Definite	ABCB1	DENDROAMIDE A		DTC	8786364
ABCB1	ABCB1	Definite	ABCB1	GABAPENTIN		NCI	17328248
ABCB1	ABCB1	Definite	ABCB1	REMIFENTANIL		PharmGKB	29755652
ABCB1	ABCB1	Definite	ABCB1	QUININE		PharmGKB
ABCB1	ABCB1	Definite	ABCB1	ERLOTINIB		PharmGKB
ABCB1	ABCB1	Definite	ABCB1	BIRICODAR		PharmGKB|TTD
ABCB1	ABCB1	Definite	ABCB1	NORTRIPTYLINE		PharmGKB	12082591
ABCB1	ABCB1	Definite	ABCB1	CHEMBL270688		DTC	18257545
ABCB1	ABCB1	Definite	ABCB1	METHYLPREDNISOLONE		PharmGKB	14583680
ABCB1	ABCB1	Definite	ABCB1	GRANISETRON		PharmGKB	29177570|27241063
ABCB1	ABCB1	Definite	ABCB1	VORICONAZOLE		PharmGKB	19033450
ABCB1	ABCB1	Definite	ABCB1	RITONAVIR		DTC|PharmGKB	17324111|26174719|14600574|17664327|24997317|16355344|23996099|28718515|1655344|21288825|25151207|20504240|25622064|17148966|26857335
ABCB1	ABCB1	Definite	ABCB1	MIDAZOLAM		PharmGKB
ABCB1	ABCB1	Definite	ABCB1	VALINOMYCIN		PharmGKB
ABCB1	ABCB1	Definite	ABCB1	PREDNISOLONE		PharmGKB	14583680|25582575
ABCB1	ABCB1	Definite	ABCB1	RESERPINE		DTC|PharmGKB	23273047|22148475
ABCB1	ABCB1	Definite	ABCB1	MORPHINE		DTC|PharmGKB	24703092|25311385|18311899|16580900|29474345|25155932|19514130|17898703
ABCB1	ABCB1	Definite	ABCB1	DELAVIRDINE		DTC	21189339
ABCB1	ABCB1	Definite	ABCB1	ALISKIREN		PharmGKB
ABCB1	ABCB1	Definite	ABCB1	AMIODARONE		PharmGKB
ABCB1	ABCB1	Definite	ABCB1	CELIPROLOL		PharmGKB
ABCB1	ABCB1	Definite	ABCB1	OXYCODONE		PharmGKB	21209234|19514130
ABCB1	ABCB1	Definite	ABCB1	PENTAZOCINE		PharmGKB
ABCB1	ABCB1	Definite	ABCB1	ITRACONAZOLE		NCI|PharmGKB	15969931
ABCB1	ABCB1	Definite	ABCB1	FLUVASTATIN		PharmGKB	16002074
ABCB1	ABCB1	Definite	ABCB1	7-ETHYL-10-HYDROXYCAMPTOTHECIN		PharmGKB
ABCB1	ABCB1	Definite	ABCB1	NIFEDIPINE		NCI	10213372
ABCB1	ABCB1	Definite	ABCB1	BLEOMYCIN		PharmGKB	25637052
ABCB1	ABCB1	Definite	ABCB1	MODAFINIL		PharmGKB	26757307
ABCB1	ABCB1	Definite	ABCB1	DIGOXIN		NCI	15969931|16674925
ABCB1	ABCB1	Definite	ABCB1	MURUCOIDIN V		DTC	22148475
ABCB1	ABCB1	Definite	ABCB1	ONDANSETRON		PharmGKB	25012726|20707787
ABCB1	ABCB1	Definite	ABCB1	PREDNISONE		PharmGKB	12175731|25637052
ABCB1	ABCB1	Definite	ABCB1	PURGIN II		DTC	23273047
ABCB1	ABCB1	Definite	ABCB1	RITUXIMAB		NCI|PharmGKB	25637052|16971809
ABCB1	ABCB1	Definite	ABCB1	CHEMBL217425		DTC	18257545
ABCB1	ABCB1	Definite	ABCB1	IDARUBICIN		PharmGKB	25558979|20938465|25567217|16331627
ABCB1	ABCB1	Definite	ABCB1	TENIPOSIDE		PharmGKB
ABCB1	ABCB1	Definite	ABCB1	PRAVASTATIN		NCI|PharmGKB	19667110|15616150
ABCB1	ABCB1	Definite	ABCB1	CYCLOSPORINE		DTC|NCI|PharmGKB	21348461|24720452|17964170|23922006|1972761|11754602|18334915|18444945|24088131|23017888|21806386|25536375|24992153|17206635|25240575|26107754|18576903|12966368|18717915|20030680|22886152
ABCB1	ABCB1	Definite	ABCB1	NEFAZODONE		PharmGKB	21449676
ABCB1	ABCB1	Definite	ABCB1	NELFINAVIR		DTC|PharmGKB	20662624|17664327|20860463|11809184|23734829|16267764|16912956
ABCB1	ABCB1	Definite	ABCB1	TARIQUIDAR	inhibitor	DTC|TdgClinicalTrial|ChemblInteractions|PharmGKB	21657271
[truncated: 1,873 more rows]
