# Supplementary material for: A conditional gene-based association framework integrating isoform-level eQTL data reveals new susceptibility genes for schizophrenia
Source: eLife. 2022 Apr 12;11:e70779. doi: 10.7554/eLife.70779 (PMC9005191; doi:10.7554/eLife.70779)
Supplement: Table 6—source data 2. [file elife-70779-table6-data2.xlsx]

## Sheet: S-PrediXcan
The drug-gene interaction term results of the potential susceptibility genes of schizophrenia identified by S-PrediXcan in DGIdb.
search_term	match_term	match_type	gene	drug	interaction_types	sources	pmids
GNL3	GNL3	Definite	GNL3	CYCLOPHOSPHAMIDE		PharmGKB
GNL3	GNL3	Definite	GNL3	EPIRUBICIN		PharmGKB
GNL3	GNL3	Definite	GNL3	FLUOROURACIL		PharmGKB
KCNJ13	KCNJ13	Definite	KCNJ13	DALFAMPRIDINE	blocker	GuideToPharmacology
PBRM1	PBRM1	Definite	PBRM1	ALPRAZOLAM		DTC	22137933
PBRM1	PBRM1	Definite	PBRM1	EVEROLIMUS		CGI|CIViC	27751729
PBRM1	PBRM1	Definite	PBRM1	TRIAZOLAM		DTC	22137933
PBRM1	PBRM1	Definite	PBRM1	IPILIMUMAB		CIViC	29301960
PBRM1	PBRM1	Definite	PBRM1	PEMBROLIZUMAB		CIViC	29301960
PBRM1	PBRM1	Definite	PBRM1	NIVOLUMAB		CIViC	29301960|31486842
PBRM1	PBRM1	Definite	PBRM1	SUNITINIB		CIViC	27751729
PBRM1	PBRM1	Definite	PBRM1	DURVALUMAB		CIViC	29301960
PBRM1	PBRM1	Definite	PBRM1	ATEZOLIZUMAB		CIViC	29301960
CHRNA3	CHRNA3	Definite	CHRNA3	TC-6499	agonist	ChemblInteractions
CHRNA3	CHRNA3	Definite	CHRNA3	PENTOLINIUM TARTRATE	antagonist	ChemblInteractions
CHRNA3	CHRNA3	Definite	CHRNA3	HEXAMETHONIUM	blocker	GuideToPharmacology
CHRNA3	CHRNA3	Definite	CHRNA3	ALCOHOL		PharmGKB	23641218|19270242
CHRNA3	CHRNA3	Definite	CHRNA3	LARAZOTIDE ACETATE	partial agonist	ChemblInteractions
CHRNA3	CHRNA3	Definite	CHRNA3	MECAMYLAMINE HYDROCHLORIDE		ChemblInteractions
CHRNA3	CHRNA3	Definite	CHRNA3	VARENICLINE	agonist|partial agonist	TdgClinicalTrial|GuideToPharmacology	16766716
CHRNA3	CHRNA3	Definite	CHRNA3	CHEMBL448084		DTC	19027295
CHRNA3	CHRNA3	Definite	CHRNA3	NICOTINE	agonist	GuideToPharmacology|PharmGKB	19560048|11006350|20886544|24535486|31402126|20400469|20081230
CHRNA3	CHRNA3	Definite	CHRNA3	EPIBATIDINE	agonist	DTC	9454827|20337496
CHRNA3	CHRNA3	Definite	CHRNA3	CHEMBL490153	blocker	GuideToPharmacology
CHRNA3	CHRNA3	Definite	CHRNA3	CHEMBL466398		DTC	19027295
CHRNA3	CHRNA3	Definite	CHRNA3	ASM-024	antagonist	ChemblInteractions
CHRNA3	CHRNA3	Definite	CHRNA3	TRIMETHAPHAN CAMSYLATE	antagonist	ChemblInteractions
CHRNA3	CHRNA3	Definite	CHRNA3	COCAINE		PharmGKB	32152934
CHRNA3	CHRNA3	Definite	CHRNA3	MECAMYLAMINE	blocker	GuideToPharmacology
CHRNA3	CHRNA3	Definite	CHRNA3	PHANTASMIDINE		DTC	20337496
CHRNA3	CHRNA3	Definite	CHRNA3	CHEMBL2332279		DTC	23352509
CHRNA3	CHRNA3	Definite	CHRNA3	ATRACURIUM	antagonist	GuideToPharmacology
CHRNA3	CHRNA3	Definite	CHRNA3	COTININE		PharmGKB
NOTCH4	NOTCH4	Definite	NOTCH4	RG-4733	inhibitor	MyCancerGenome
NOTCH4	NOTCH4	Definite	NOTCH4	NIROGACESTAT	inhibitor	MyCancerGenome
NOTCH4	NOTCH4	Definite	NOTCH4	CRENIGACESTAT		TTD
NOTCH4	NOTCH4	Definite	NOTCH4	ALLOPURINOL		PharmGKB	29193002
KMT2E	KMT2E	Definite	KMT2E	DULOXETINE		PharmGKB	28696415
SF3B1	SF3B1	Definite	SF3B1	E7107		JAX-CKB	27622333
BAG6	BAG6	Definite	BAG6	CARBAMAZEPINE		PharmGKB	16538176
NEK4	NEK4	Definite	NEK4	R-406		DTC
NEK4	NEK4	Definite	NEK4	DOVITINIB		DTC
NEK4	NEK4	Definite	NEK4	CHEMBL541400		DTC
NEK4	NEK4	Definite	NEK4	GW441756X		DTC
NEK4	NEK4	Definite	NEK4	TAE-684		DTC
NEK4	NEK4	Definite	NEK4	SNS-314		DTC
NEK4	NEK4	Definite	NEK4	CENISERTIB		DTC
NEK4	NEK4	Definite	NEK4	CYC-116		DTC
NEK4	NEK4	Definite	NEK4	CHEMBL225519		DTC
NEK4	NEK4	Definite	NEK4	SP-600125		DTC
NEK4	NEK4	Definite	NEK4	ILORASERTIB		DTC
CCHCR1	CCHCR1	Definite	CCHCR1	NEVIRAPINE		PharmGKB	21810746
CYP2D6	CYP2D6	Definite	CYP2D6	CLEBOPRIDE		DTC
CYP2D6	CYP2D6	Definite	CYP2D6	CHEMBL31741		DTC
CYP2D6	CYP2D6	Definite	CYP2D6	RANITIDINE		DTC	22931300
CYP2D6	CYP2D6	Definite	CYP2D6	DOXORUBICIN		DTC	22931300
CYP2D6	CYP2D6	Definite	CYP2D6	PARAROSANILINE		DTC
CYP2D6	CYP2D6	Definite	CYP2D6	FLUNISOLIDE		DTC	22931300
CYP2D6	CYP2D6	Definite	CYP2D6	TRIMIPRAMINE		PharmGKB|FDA	9918137|20531370|1346258|15252821|14716707|18359183|14520122|8867869|8181196|17721180|1527229|17667959|15115913|12360109|14646691|15205367|11682257|16024198|10774635|16361630|17008819|23486447|10460069|9585799|16871470
CYP2D6	CYP2D6	Definite	CYP2D6	KETOROLAC		PharmGKB	17986163
CYP2D6	CYP2D6	Definite	CYP2D6	NS-398		DTC
CYP2D6	CYP2D6	Definite	CYP2D6	CAPSAZEPINE		DTC
CYP2D6	CYP2D6	Definite	CYP2D6	TICRYNAFEN		DTC	22931300
CYP2D6	CYP2D6	Definite	CYP2D6	ALCOHOL		PharmGKB	24611668
CYP2D6	CYP2D6	Definite	CYP2D6	QUETIAPINE		PharmGKB	29472872|16871470
CYP2D6	CYP2D6	Definite	CYP2D6	METHOXSALEN		DTC
CYP2D6	CYP2D6	Definite	CYP2D6	MODAFINIL		DTC|NCI|PharmGKB|FDA	22931300|10820139
CYP2D6	CYP2D6	Definite	CYP2D6	BERGAPTEN		DTC
CYP2D6	CYP2D6	Definite	CYP2D6	TAMSULOSIN		PharmGKB|FDA
CYP2D6	CYP2D6	Definite	CYP2D6	CHEMBL20377		DTC
CYP2D6	CYP2D6	Definite	CYP2D6	PITOLISANT		PharmGKB|FDA
CYP2D6	CYP2D6	Definite	CYP2D6	AGROCLAVINE		DTC
CYP2D6	CYP2D6	Definite	CYP2D6	BUFLOMEDIL		DTC
CYP2D6	CYP2D6	Definite	CYP2D6	THONZONIUM		DTC
CYP2D6	CYP2D6	Definite	CYP2D6	VALPROIC ACID		DTC	22931300
CYP2D6	CYP2D6	Definite	CYP2D6	ERYTHROMYCIN		DTC	22931300
CYP2D6	CYP2D6	Definite	CYP2D6	SELEGILINE		DTC	22931300
CYP2D6	CYP2D6	Definite	CYP2D6	PAROXETINE		FDA
CYP2D6	CYP2D6	Definite	CYP2D6	ALVERINE CITRATE		DTC
CYP2D6	CYP2D6	Definite	CYP2D6	BENPERIDOL		DTC
CYP2D6	CYP2D6	Definite	CYP2D6	DEGUELIN		DTC
CYP2D6	CYP2D6	Definite	CYP2D6	METHOCARBAMOL		DTC	22931300
CYP2D6	CYP2D6	Definite	CYP2D6	GRAMINE		DTC
CYP2D6	CYP2D6	Definite	CYP2D6	DIPYRIDAMOLE		DTC
CYP2D6	CYP2D6	Definite	CYP2D6	ASARININ		DTC
CYP2D6	CYP2D6	Definite	CYP2D6	PIMETHIXENE		DTC
CYP2D6	CYP2D6	Definite	CYP2D6	DIAZOXIDE		DTC
CYP2D6	CYP2D6	Definite	CYP2D6	(R)-FLECAINIDE		DTC
CYP2D6	CYP2D6	Definite	CYP2D6	AZITHROMYCIN		DTC	22931300
CYP2D6	CYP2D6	Definite	CYP2D6	CHEMBL123904		DTC
CYP2D6	CYP2D6	Definite	CYP2D6	MEPIVACAINE		DTC	22931300
CYP2D6	CYP2D6	Definite	CYP2D6	CHEMBL1079460		DTC
CYP2D6	CYP2D6	Definite	CYP2D6	CLOTRIMAZOLE		DTC
CYP2D6	CYP2D6	Definite	CYP2D6	ZOXAZOLAMINE		DTC	22931300
CYP2D6	CYP2D6	Definite	CYP2D6	CHEMBL429095		DTC
CYP2D6	CYP2D6	Definite	CYP2D6	ELLIPTECINE		DTC
CYP2D6	CYP2D6	Definite	CYP2D6	TOLPERISONE		PharmGKB	25953735
CYP2D6	CYP2D6	Definite	CYP2D6	SB-224289		DTC
CYP2D6	CYP2D6	Definite	CYP2D6	ELIGLUSTAT		PharmGKB|FDA	20864621
CYP2D6	CYP2D6	Definite	CYP2D6	PROPAFENONE		PharmGKB|FDA	2713973|14653957|17001296|12421483|17460029
CYP2D6	CYP2D6	Definite	CYP2D6	ETHINYL ESTRADIOL		DTC	22931300
CYP2D6	CYP2D6	Definite	CYP2D6	SB-431542		DTC
CYP2D6	CYP2D6	Definite	CYP2D6	CHEMBL1394328		DTC
CYP2D6	CYP2D6	Definite	CYP2D6	KETOTIFEN		DTC
CYP2D6	CYP2D6	Definite	CYP2D6	CODEINE		FDA
CYP2D6	CYP2D6	Definite	CYP2D6	BROMAZEPAM		PharmGKB
CYP2D6	CYP2D6	Definite	CYP2D6	LOVASTATIN		DTC|PharmGKB	22281720|22931300
CYP2D6	CYP2D6	Definite	CYP2D6	DIHYDROSPINGOSINE		DTC
CYP2D6	CYP2D6	Definite	CYP2D6	CHEMBL609628		DTC
CYP2D6	CYP2D6	Definite	CYP2D6	DOCEBENONE		DTC
CYP2D6	CYP2D6	Definite	CYP2D6	GRANISETRON		PharmGKB	16551910
CYP2D6	CYP2D6	Definite	CYP2D6	PIRIBEDIL		DTC
CYP2D6	CYP2D6	Definite	CYP2D6	DOMPERIDONE		DTC
CYP2D6	CYP2D6	Definite	CYP2D6	PROPOXYCAINE		DTC
CYP2D6	CYP2D6	Definite	CYP2D6	GLUTETHIMIDE		TTD
CYP2D6	CYP2D6	Definite	CYP2D6	FLUVOXAMINE		FDA
CYP2D6	CYP2D6	Definite	CYP2D6	PHENOXYBENZAMINE		DTC	22931300
CYP2D6	CYP2D6	Definite	CYP2D6	(R,S)-INDATRALINE		DTC
CYP2D6	CYP2D6	Definite	CYP2D6	SPIPERONE		DTC
CYP2D6	CYP2D6	Definite	CYP2D6	CROMOLYN		DTC	22931300
CYP2D6	CYP2D6	Definite	CYP2D6	CHEMBL512908		DTC
CYP2D6	CYP2D6	Definite	CYP2D6	CHEMBL88147		DTC
CYP2D6	CYP2D6	Definite	CYP2D6	CHEMBL83954		DTC
CYP2D6	CYP2D6	Definite	CYP2D6	HALOPERIDOL		DTC
CYP2D6	CYP2D6	Definite	CYP2D6	RALOXIFENE		DTC	22931300
CYP2D6	CYP2D6	Definite	CYP2D6	CARVEDILOL		FDA
CYP2D6	CYP2D6	Definite	CYP2D6	ARFORMOTEROL		PharmGKB|FDA
CYP2D6	CYP2D6	Definite	CYP2D6	ALLOPURINOL		DTC	22931300
CYP2D6	CYP2D6	Definite	CYP2D6	DEXEFAROXAN		DTC
CYP2D6	CYP2D6	Definite	CYP2D6	(-)-U-50488		DTC
CYP2D6	CYP2D6	Definite	CYP2D6	ADIPHENINE		DTC
CYP2D6	CYP2D6	Definite	CYP2D6	ENDO-ATROPINE		DTC	22931300
CYP2D6	CYP2D6	Definite	CYP2D6	THIORIDAZINE		PharmGKB|FDA	19604081|2007317
CYP2D6	CYP2D6	Definite	CYP2D6	CYCLOBENZAPRINE		DTC
CYP2D6	CYP2D6	Definite	CYP2D6	HYDROCOTARNINE		DTC
CYP2D6	CYP2D6	Definite	CYP2D6	GEFITINIB		FDA
CYP2D6	CYP2D6	Definite	CYP2D6	BENZETHONIUM		DTC
CYP2D6	CYP2D6	Definite	CYP2D6	CHEMBL1288013		DTC
CYP2D6	CYP2D6	Definite	CYP2D6	U-50488 METHANE SULFONATE		DTC
CYP2D6	CYP2D6	Definite	CYP2D6	BENZAMIL		DTC
CYP2D6	CYP2D6	Definite	CYP2D6	PHENYLBUTAZONE		DTC	22931300
CYP2D6	CYP2D6	Definite	CYP2D6	OXYMETAZOLINE		DTC
CYP2D6	CYP2D6	Definite	CYP2D6	PNU-99194A		DTC
CYP2D6	CYP2D6	Definite	CYP2D6	PALONOSETRON		PharmGKB|FDA
CYP2D6	CYP2D6	Definite	CYP2D6	CEVIMELINE		PharmGKB|FDA
CYP2D6	CYP2D6	Definite	CYP2D6	DOXEPIN		FDA
CYP2D6	CYP2D6	Definite	CYP2D6	BECLOMETHASONE		DTC	22931300
CYP2D6	CYP2D6	Definite	CYP2D6	TACROLIMUS		NCI	17202802
CYP2D6	CYP2D6	Definite	CYP2D6	NITROFURANTOIN		DTC	22931300
CYP2D6	CYP2D6	Definite	CYP2D6	REMOXIPRIDE		DTC	22931300
CYP2D6	CYP2D6	Definite	CYP2D6	CORYNANTHEINE		DTC
CYP2D6	CYP2D6	Definite	CYP2D6	EMODIN		DTC
CYP2D6	CYP2D6	Definite	CYP2D6	NIACIN		DTC	22931300
CYP2D6	CYP2D6	Definite	CYP2D6	BUDESONIDE		DTC	22931300
CYP2D6	CYP2D6	Definite	CYP2D6	OLVANIL		DTC
CYP2D6	CYP2D6	Definite	CYP2D6	SOTALOL		DTC	22931300
CYP2D6	CYP2D6	Definite	CYP2D6	DEXTROMETHORPHAN		DTC|FDA	21422192
CYP2D6	CYP2D6	Definite	CYP2D6	CHEMBL177809		DTC
CYP2D6	CYP2D6	Definite	CYP2D6	DIDANOSINE		DTC	22931300
CYP2D6	CYP2D6	Definite	CYP2D6	DAPOXETINE		PharmGKB	26937172
CYP2D6	CYP2D6	Definite	CYP2D6	CHEMBL1339015		DTC
CYP2D6	CYP2D6	Definite	CYP2D6	PROPYLPYRAZOLETRIOL		DTC
CYP2D6	CYP2D6	Definite	CYP2D6	TELENZEPINE		DTC
CYP2D6	CYP2D6	Definite	CYP2D6	INDINAVIR		DTC	22931300
CYP2D6	CYP2D6	Definite	CYP2D6	PHENOBARBITAL		DTC	22931300
CYP2D6	CYP2D6	Definite	CYP2D6	CHEMBL1329326		DTC
CYP2D6	CYP2D6	Definite	CYP2D6	GARLIC		NCI	15974642
CYP2D6	CYP2D6	Definite	CYP2D6	DULOXETINE		FDA
CYP2D6	CYP2D6	Definite	CYP2D6	MEFENAMIC ACID		DTC	22931300
CYP2D6	CYP2D6	Definite	CYP2D6	BREXPIPRAZOLE		PharmGKB|FDA
CYP2D6	CYP2D6	Definite	CYP2D6	CHEMBL591613		DTC
CYP2D6	CYP2D6	Definite	CYP2D6	DEXTROMETHORPHAN HYDROBROMIDE		DTC
CYP2D6	CYP2D6	Definite	CYP2D6	DIPHENHYDRAMINE		DTC	22931300
CYP2D6	CYP2D6	Definite	CYP2D6	CIMETIDINE		DTC	22931300
CYP2D6	CYP2D6	Definite	CYP2D6	AMSACRINE		DTC	22931300
CYP2D6	CYP2D6	Definite	CYP2D6	INDOMETHACIN		DTC	22931300
CYP2D6	CYP2D6	Definite	CYP2D6	CHLOROPYRAMINE		DTC
CYP2D6	CYP2D6	Definite	CYP2D6	DONEPEZIL		PharmGKB|FDA	24433464|26952092
CYP2D6	CYP2D6	Definite	CYP2D6	NORDIHYDROGUAIARETIC ACID		DTC
CYP2D6	CYP2D6	Definite	CYP2D6	CLOFAZIMINE		DTC
CYP2D6	CYP2D6	Definite	CYP2D6	MAPROTILINE HYDROCHLORIDE		DTC
CYP2D6	CYP2D6	Definite	CYP2D6	ISOQUINE		TTD
CYP2D6	CYP2D6	Definite	CYP2D6	LOFEXIDINE		PharmGKB|FDA
CYP2D6	CYP2D6	Definite	CYP2D6	SULINDAC		DTC	22931300
CYP2D6	CYP2D6	Definite	CYP2D6	COLCHICINE		DTC|PharmGKB	22931300|25645282
CYP2D6	CYP2D6	Definite	CYP2D6	VERNAKALANT		PharmGKB
CYP2D6	CYP2D6	Definite	CYP2D6	TACRINE		DTC	22931300
CYP2D6	CYP2D6	Definite	CYP2D6	MORPHINE		PharmGKB	19523031|8351162|17986163
CYP2D6	CYP2D6	Definite	CYP2D6	PYRILAMINE		DTC
CYP2D6	CYP2D6	Definite	CYP2D6	MIRABEGRON		PharmGKB|FDA
CYP2D6	CYP2D6	Definite	CYP2D6	PHENYTOIN		DTC|PharmGKB	22931300|24915025
CYP2D6	CYP2D6	Definite	CYP2D6	ACETAMINOPHEN		DTC|PharmGKB	19219744|11095574|26049587|19308365|22931300|17564651
CYP2D6	CYP2D6	Definite	CYP2D6	DYCLONINE		DTC
CYP2D6	CYP2D6	Definite	CYP2D6	HYDROMORPHONE		PharmGKB	17986163
CYP2D6	CYP2D6	Definite	CYP2D6	NICLOSAMIDE		DTC
CYP2D6	CYP2D6	Definite	CYP2D6	ESOXYBUTYNIN		DTC
CYP2D6	CYP2D6	Definite	CYP2D6	GLAFENINE		DTC	22931300
CYP2D6	CYP2D6	Definite	CYP2D6	DEXAMETHASONE		DTC	22931300
CYP2D6	CYP2D6	Definite	CYP2D6	TIMOLOL		DTC|PharmGKB	7474246|16315032
CYP2D6	CYP2D6	Definite	CYP2D6	(S)-AMPA		DTC
CYP2D6	CYP2D6	Definite	CYP2D6	MECLIZINE		DTC|PharmGKB|FDA	22931300
CYP2D6	CYP2D6	Definite	CYP2D6	TIOTROPIUM		PharmGKB
CYP2D6	CYP2D6	Definite	CYP2D6	DROPERIDOL		DTC
CYP2D6	CYP2D6	Definite	CYP2D6	CLOFIBRIC ACID		DTC
CYP2D6	CYP2D6	Definite	CYP2D6	LORATADINE		DTC
CYP2D6	CYP2D6	Definite	CYP2D6	RACLOPRIDE		DTC
CYP2D6	CYP2D6	Definite	CYP2D6	MONTELUKAST		DTC	22931300
CYP2D6	CYP2D6	Definite	CYP2D6	CLOFIBRATE		DTC	22931300
CYP2D6	CYP2D6	Definite	CYP2D6	GUAIFENESIN		DTC	22931300
CYP2D6	CYP2D6	Definite	CYP2D6	PIPENZOLATE		DTC
CYP2D6	CYP2D6	Definite	CYP2D6	ISOBOLDINE		DTC
CYP2D6	CYP2D6	Definite	CYP2D6	(R,S)-IFENPRODIL		DTC
CYP2D6	CYP2D6	Definite	CYP2D6	PROMAZINE		DTC
CYP2D6	CYP2D6	Definite	CYP2D6	(R)-PINOCEMBRIN		DTC
CYP2D6	CYP2D6	Definite	CYP2D6	ZOLANTIDINE		DTC
CYP2D6	CYP2D6	Definite	CYP2D6	CLEMASTINE		DTC	22931300
CYP2D6	CYP2D6	Definite	CYP2D6	DESIPRAMINE		DTC|PharmGKB|FDA	9918137|8422746|20531370|10895986|1346258|15252821|14652703|14716707|6488689|18359183|14520122|8867869|9049581|8181196|8941025|17721180|3533565|3356084|17667959|15115913|12360109|14646691|15205367|27440861|11682257|16024198|3769385|16361630|17008819|23486447|10460069|9585799|16871470|11417443
CYP2D6	CYP2D6	Definite	CYP2D6	BUTYLATED HYDROXYTOLUENE		DTC	22931300
CYP2D6	CYP2D6	Definite	CYP2D6	APTIGANEL		DTC
CYP2D6	CYP2D6	Definite	CYP2D6	PI-CLONIDINE		DTC
CYP2D6	CYP2D6	Definite	CYP2D6	DAIDZEIN		DTC
CYP2D6	CYP2D6	Definite	CYP2D6	KETOPROFEN		PharmGKB	25989235
CYP2D6	CYP2D6	Definite	CYP2D6	SULPIRIDE		DTC	22931300
CYP2D6	CYP2D6	Definite	CYP2D6	UPADACITINIB		PharmGKB|FDA
CYP2D6	CYP2D6	Definite	CYP2D6	CHEMBL434063		DTC
CYP2D6	CYP2D6	Definite	CYP2D6	ECADOTRIL		DTC
CYP2D6	CYP2D6	Definite	CYP2D6	AMITRIPTYLINE		DTC|FDA	22931300
CYP2D6	CYP2D6	Definite	CYP2D6	TERBINAFINE		PharmGKB
CYP2D6	CYP2D6	Definite	CYP2D6	CLOMIPRAMINE		DTC|FDA
CYP2D6	CYP2D6	Definite	CYP2D6	HYDROXYZINE		DTC	22931300
CYP2D6	CYP2D6	Definite	CYP2D6	TAMOXIFEN CITRATE		DTC
CYP2D6	CYP2D6	Definite	CYP2D6	FASUDIL		DTC
CYP2D6	CYP2D6	Definite	CYP2D6	BERBERINE		DTC
CYP2D6	CYP2D6	Definite	CYP2D6	IBRUTINIB		PharmGKB
CYP2D6	CYP2D6	Definite	CYP2D6	CLARITHROMYCIN		DTC	22931300
CYP2D6	CYP2D6	Definite	CYP2D6	CARIPRAZINE		PharmGKB|FDA
CYP2D6	CYP2D6	Definite	CYP2D6	CHEMBL591126		DTC
CYP2D6	CYP2D6	Definite	CYP2D6	DIPHENYLPYRALINE		DTC
CYP2D6	CYP2D6	Definite	CYP2D6	CLONIDINE		DTC|PharmGKB
CYP2D6	CYP2D6	Definite	CYP2D6	PENICILLIN V BENZATHINE		DTC
CYP2D6	CYP2D6	Definite	CYP2D6	FLUOXETINE		DTC|FDA	22931300
CYP2D6	CYP2D6	Definite	CYP2D6	DALFAMPRIDINE		DTC
CYP2D6	CYP2D6	Definite	CYP2D6	ISOXSUPRINE		DTC
CYP2D6	CYP2D6	Definite	CYP2D6	METHYLDOPA		DTC	22931300
CYP2D6	CYP2D6	Definite	CYP2D6	DICYCLOMINE		DTC
CYP2D6	CYP2D6	Definite	CYP2D6	TORSEMIDE		DTC	22931300
CYP2D6	CYP2D6	Definite	CYP2D6	NEFAZODONE		PharmGKB|FDA
CYP2D6	CYP2D6	Definite	CYP2D6	CHEMBL66114		DTC
CYP2D6	CYP2D6	Definite	CYP2D6	CYC-116		DTC	20462263
CYP2D6	CYP2D6	Definite	CYP2D6	CHEMBL74121		DTC
CYP2D6	CYP2D6	Definite	CYP2D6	PLICAMYCIN		DTC	22931300
CYP2D6	CYP2D6	Definite	CYP2D6	PREDNISONE		DTC	22931300
CYP2D6	CYP2D6	Definite	CYP2D6	CHLOROPHENYLPIPERAZINE		DTC
CYP2D6	CYP2D6	Definite	CYP2D6	CHEMBL187216		DTC
CYP2D6	CYP2D6	Definite	CYP2D6	FENTANYL		PharmGKB	25825958
CYP2D6	CYP2D6	Definite	CYP2D6	PIMOZIDE		DTC|PharmGKB|FDA	9951426|23059146
CYP2D6	CYP2D6	Definite	CYP2D6	GLYCINE		DTC	22931300
CYP2D6	CYP2D6	Definite	CYP2D6	HARMALINE		DTC
CYP2D6	CYP2D6	Definite	CYP2D6	TETRABENAZINE		PharmGKB|FDA	23280482
CYP2D6	CYP2D6	Definite	CYP2D6	ZUCLOPENTHIXOL		PharmGKB	12107620|1927573
CYP2D6	CYP2D6	Definite	CYP2D6	PROCHLORPERAZINE		DTC	22931300
CYP2D6	CYP2D6	Definite	CYP2D6	CHEMBL587259		DTC
CYP2D6	CYP2D6	Definite	CYP2D6	DEXPROPRANOLOL		DTC
CYP2D6	CYP2D6	Definite	CYP2D6	DIHYDROXIDINE		DTC
CYP2D6	CYP2D6	Definite	CYP2D6	STAVUDINE		DTC	22931300
CYP2D6	CYP2D6	Definite	CYP2D6	GRAVEOLINE		DTC
CYP2D6	CYP2D6	Definite	CYP2D6	PALIPERIDONE		PharmGKB|FDA	15767244
CYP2D6	CYP2D6	Definite	CYP2D6	SULFASALAZINE		DTC	22931300
CYP2D6	CYP2D6	Definite	CYP2D6	SPIRAMIDE		DTC
CYP2D6	CYP2D6	Definite	CYP2D6	AMPHETAMINE		NCI|PharmGKB|FDA	9264312
CYP2D6	CYP2D6	Definite	CYP2D6	LINEZOLID		DTC	24044938
CYP2D6	CYP2D6	Definite	CYP2D6	AMOXICILLIN		DTC	22931300
CYP2D6	CYP2D6	Definite	CYP2D6	ZAFIRLUKAST		DTC	22931300
CYP2D6	CYP2D6	Definite	CYP2D6	CHEMBL1161520		DTC
CYP2D6	CYP2D6	Definite	CYP2D6	SERTINDOLE		PharmGKB
CYP2D6	CYP2D6	Definite	CYP2D6	CHEMBL327980		DTC
CYP2D6	CYP2D6	Definite	CYP2D6	NORTRIPTYLINE		DTC|FDA
CYP2D6	CYP2D6	Definite	CYP2D6	ZILEUTON		DTC	22931300
CYP2D6	CYP2D6	Definite	CYP2D6	ARIPIPRAZOLE		FDA
CYP2D6	CYP2D6	Definite	CYP2D6	CHEMBL580421		DTC
CYP2D6	CYP2D6	Definite	CYP2D6	DIETHYLSTILBESTROL		DTC	22931300
CYP2D6	CYP2D6	Definite	CYP2D6	ASTEMIZOLE		DTC
CYP2D6	CYP2D6	Definite	CYP2D6	MEXILETINE		NCI|PharmGKB	9806111
CYP2D6	CYP2D6	Definite	CYP2D6	CEFTRIAXONE		DTC	22931300
CYP2D6	CYP2D6	Definite	CYP2D6	BENOXINATE		DTC
CYP2D6	CYP2D6	Definite	CYP2D6	RITANSERIN		DTC
CYP2D6	CYP2D6	Definite	CYP2D6	CHEMBL275311		DTC
CYP2D6	CYP2D6	Definite	CYP2D6	CHEMBL88272		DTC
CYP2D6	CYP2D6	Definite	CYP2D6	IODOMELATONIN		DTC
CYP2D6	CYP2D6	Definite	CYP2D6	CHEMBL287327		DTC
CYP2D6	CYP2D6	Definite	CYP2D6	NAPHAZOLINE		DTC
CYP2D6	CYP2D6	Definite	CYP2D6	PERPHENAZINE		DTC|PharmGKB|FDA	2743709
CYP2D6	CYP2D6	Definite	CYP2D6	RUCAPARIB		PharmGKB|FDA
CYP2D6	CYP2D6	Definite	CYP2D6	HYCANTHONE		DTC	22931300
CYP2D6	CYP2D6	Definite	CYP2D6	GUANFACINE		DTC
CYP2D6	CYP2D6	Definite	CYP2D6	CHLOROQUINE		DTC	22931300
CYP2D6	CYP2D6	Definite	CYP2D6	OXYMORPHONE		PharmGKB
CYP2D6	CYP2D6	Definite	CYP2D6	FORMOTEROL		PharmGKB|FDA
CYP2D6	CYP2D6	Definite	CYP2D6	TROLEANDOMYCIN		DTC	22931300
CYP2D6	CYP2D6	Definite	CYP2D6	PHENELZINE		DTC
CYP2D6	CYP2D6	Definite	CYP2D6	UMECLIDINIUM		PharmGKB|FDA
CYP2D6	CYP2D6	Definite	CYP2D6	NEBIVOLOL		PharmGKB|FDA
CYP2D6	CYP2D6	Definite	CYP2D6	RAUWOLFIA SERPENTINA		DTC
CYP2D6	CYP2D6	Definite	CYP2D6	VANOXERINE		DTC
CYP2D6	CYP2D6	Definite	CYP2D6	BOLDINE		DTC
CYP2D6	CYP2D6	Definite	CYP2D6	PROTRIPTYLINE		DTC|PharmGKB|FDA
CYP2D6	CYP2D6	Definite	CYP2D6	ALBUMIN HUMAN		NCI	11246175
CYP2D6	CYP2D6	Definite	CYP2D6	MAPROTILINE		DTC	22931300
CYP2D6	CYP2D6	Definite	CYP2D6	ELETRIPTAN		PharmGKB
CYP2D6	CYP2D6	Definite	CYP2D6	CLOBENPROPIT		DTC
CYP2D6	CYP2D6	Definite	CYP2D6	CHEMBL53898		DTC
CYP2D6	CYP2D6	Definite	CYP2D6	TOLTERODINE		PharmGKB|FDA	21352267|20530222|10190648|9630826|10583026|28087463
CYP2D6	CYP2D6	Definite	CYP2D6	RILMENIDINE		DTC
CYP2D6	CYP2D6	Definite	CYP2D6	LANSOPRAZOLE		DTC
CYP2D6	CYP2D6	Definite	CYP2D6	CHEMBL547101		DTC
CYP2D6	CYP2D6	Definite	CYP2D6	CHEMBL1256851		DTC
CYP2D6	CYP2D6	Definite	CYP2D6	METYROSINE		DTC	22931300
CYP2D6	CYP2D6	Definite	CYP2D6	VANIPREVIR		DTC	19841155
CYP2D6	CYP2D6	Definite	CYP2D6	CHEMBL1410004		DTC
CYP2D6	CYP2D6	Definite	CYP2D6	CHLORPROMAZINE		DTC|PharmGKB	8739822
CYP2D6	CYP2D6	Definite	CYP2D6	MIRTAZAPINE		DTC
CYP2D6	CYP2D6	Definite	CYP2D6	PSEUDOEPHEDRINE		DTC
CYP2D6	CYP2D6	Definite	CYP2D6	METOPROLOL		FDA
CYP2D6	CYP2D6	Definite	CYP2D6	CHEMBL85194		DTC
CYP2D6	CYP2D6	Definite	CYP2D6	PERHEXILINE		DTC|PharmGKB	22931300
CYP2D6	CYP2D6	Definite	CYP2D6	VORICONAZOLE		NCI	16141569
CYP2D6	CYP2D6	Definite	CYP2D6	AZATHIOPRINE		DTC	22931300
CYP2D6	CYP2D6	Definite	CYP2D6	PROPYLTHIOURACIL		DTC	22931300
CYP2D6	CYP2D6	Definite	CYP2D6	PYRAZINAMIDE		DTC	22931300
CYP2D6	CYP2D6	Definite	CYP2D6	IBUPROFEN		DTC	22931300
CYP2D6	CYP2D6	Definite	CYP2D6	U-0126		DTC
CYP2D6	CYP2D6	Definite	CYP2D6	CIPROFLOXACIN		DTC|PharmGKB	27469576|22931300
CYP2D6	CYP2D6	Definite	CYP2D6	CYPROTERONE		DTC	22931300
CYP2D6	CYP2D6	Definite	CYP2D6	ETOPOSIDE		DTC	22931300
CYP2D6	CYP2D6	Definite	CYP2D6	CILOSTAZOL		DTC	22931300
CYP2D6	CYP2D6	Definite	CYP2D6	BP-897		DTC
CYP2D6	CYP2D6	Definite	CYP2D6	DARIFENACIN		PharmGKB|FDA
CYP2D6	CYP2D6	Definite	CYP2D6	CHEMBL1096339		DTC
CYP2D6	CYP2D6	Definite	CYP2D6	DANTROLENE		DTC	22931300
CYP2D6	CYP2D6	Definite	CYP2D6	CHEMBL601135		DTC
CYP2D6	CYP2D6	Definite	CYP2D6	PROPRANOLOL		DTC|FDA	22931300
CYP2D6	CYP2D6	Definite	CYP2D6	CHEMBL530733		DTC
CYP2D6	CYP2D6	Definite	CYP2D6	CYPROHEPTADINE		DTC
CYP2D6	CYP2D6	Definite	CYP2D6	LEUCINE		DTC	22931300
CYP2D6	CYP2D6	Definite	CYP2D6	CHEMBL333121		DTC
CYP2D6	CYP2D6	Definite	CYP2D6	GALANTAMINE		PharmGKB|FDA	23503455
CYP2D6	CYP2D6	Definite	CYP2D6	DEXTROMEPROMAZINE		DTC
CYP2D6	CYP2D6	Definite	CYP2D6	PAPAVERINE		DTC
CYP2D6	CYP2D6	Definite	CYP2D6	E-DOXEPIN		DTC
CYP2D6	CYP2D6	Definite	CYP2D6	CHEMBL287045		DTC
CYP2D6	CYP2D6	Definite	CYP2D6	APOMORPHINE		DTC
CYP2D6	CYP2D6	Definite	CYP2D6	DIMETHISOQUIN		DTC
CYP2D6	CYP2D6	Definite	CYP2D6	CHEMBL335741		DTC
CYP2D6	CYP2D6	Definite	CYP2D6	METOCLOPRAMIDE		FDA
CYP2D6	CYP2D6	Definite	CYP2D6	KETANSERIN TARTRATE		DTC
CYP2D6	CYP2D6	Definite	CYP2D6	CHEMBL445102		DTC
CYP2D6	CYP2D6	Definite	CYP2D6	L-694247		DTC
CYP2D6	CYP2D6	Definite	CYP2D6	LEVOMEPROMAZINE		PharmGKB	19308365|29472872
CYP2D6	CYP2D6	Definite	CYP2D6	TRIMETHOPRIM		DTC	22931300
CYP2D6	CYP2D6	Definite	CYP2D6	VORTIOXETINE		PharmGKB|FDA
CYP2D6	CYP2D6	Definite	CYP2D6	BIOCHANIN		DTC
CYP2D6	CYP2D6	Definite	CYP2D6	SP-600125		DTC
CYP2D6	CYP2D6	Definite	CYP2D6	ETHYLISOTHIOUREA		DTC
CYP2D6	CYP2D6	Definite	CYP2D6	NATEGLINIDE		DTC	22931300
CYP2D6	CYP2D6	Definite	CYP2D6	AZTREONAM		DTC	22931300
CYP2D6	CYP2D6	Definite	CYP2D6	AMOXAPINE		DTC|PharmGKB|FDA
CYP2D6	CYP2D6	Definite	CYP2D6	THIOPERAMIDE		DTC
CYP2D6	CYP2D6	Definite	CYP2D6	DRONEDARONE		PharmGKB
CYP2D6	CYP2D6	Definite	CYP2D6	CHEMBL79140		DTC
CYP2D6	CYP2D6	Definite	CYP2D6	OXYBUTYNIN		DTC	22931300
CYP2D6	CYP2D6	Definite	CYP2D6	LOPERAMIDE		DTC
CYP2D6	CYP2D6	Definite	CYP2D6	DICLOFENAC		DTC	22931300
CYP2D6	CYP2D6	Definite	CYP2D6	KARANJIN		DTC
CYP2D6	CYP2D6	Definite	CYP2D6	PF-03715455		DTC	21888439
CYP2D6	CYP2D6	Definite	CYP2D6	AMIODARONE		DTC|PharmGKB
CYP2D6	CYP2D6	Definite	CYP2D6	CHEMBL83899		DTC
CYP2D6	CYP2D6	Definite	CYP2D6	PHENTOLAMINE MESYLATE		DTC
CYP2D6	CYP2D6	Definite	CYP2D6	ALPROSTADIL		DTC	22931300
CYP2D6	CYP2D6	Definite	CYP2D6	CLOMETHIAZOLE		DTC
CYP2D6	CYP2D6	Definite	CYP2D6	TRIFLUPROMAZINE		DTC
CYP2D6	CYP2D6	Definite	CYP2D6	REL-CISAPRIDE		DTC	22931300
CYP2D6	CYP2D6	Definite	CYP2D6	HARMOL		DTC
CYP2D6	CYP2D6	Definite	CYP2D6	NEVIRAPINE		DTC|PharmGKB	22931300
CYP2D6	CYP2D6	Definite	CYP2D6	MINOCYCLINE		DTC	22931300
CYP2D6	CYP2D6	Definite	CYP2D6	CAFFEINE		DTC	22931300
CYP2D6	CYP2D6	Definite	CYP2D6	CHEMBL71294		DTC
CYP2D6	CYP2D6	Definite	CYP2D6	LEVOBUPIVACAINE		DTC
CYP2D6	CYP2D6	Definite	CYP2D6	IMIPRAMINE		DTC|FDA	22931300
CYP2D6	CYP2D6	Definite	CYP2D6	CORTICOTROPIN		NCI	12571407
CYP2D6	CYP2D6	Definite	CYP2D6	RITONAVIR		PharmGKB	24433361
CYP2D6	CYP2D6	Definite	CYP2D6	LAPACHONE		DTC
CYP2D6	CYP2D6	Definite	CYP2D6	ICI-199,441		DTC
CYP2D6	CYP2D6	Definite	CYP2D6	PROPANTHELINE		DTC
CYP2D6	CYP2D6	Definite	CYP2D6	CHEMBL258465		DTC
CYP2D6	CYP2D6	Definite	CYP2D6	METARAMINOL		DTC	22931300
CYP2D6	CYP2D6	Definite	CYP2D6	FLIBANSERIN		PharmGKB|FDA
CYP2D6	CYP2D6	Definite	CYP2D6	HYDROCODONE		PharmGKB	9352573|12920424|25621429|24269714|20837591|7693389|16631290
CYP2D6	CYP2D6	Definite	CYP2D6	CHEMBL1256678		DTC
CYP2D6	CYP2D6	Definite	CYP2D6	HYDRALAZINE		DTC	22931300
CYP2D6	CYP2D6	Definite	CYP2D6	ISOPROPAMIDE		DTC
CYP2D6	CYP2D6	Definite	CYP2D6	ATORVASTATIN		PharmGKB	17700359
CYP2D6	CYP2D6	Definite	CYP2D6	3',4' DICHLOROBENZAMIL		DTC
CYP2D6	CYP2D6	Definite	CYP2D6	FIPEXIDE		DTC
CYP2D6	CYP2D6	Definite	CYP2D6	FLUCONAZOLE		DTC	22931300
CYP2D6	CYP2D6	Definite	CYP2D6	INDIRUBIN-3-MONOXIME		DTC
CYP2D6	CYP2D6	Definite	CYP2D6	CHEMBL1358137		DTC
CYP2D6	CYP2D6	Definite	CYP2D6	CHLORPROPAMIDE		DTC	22931300
CYP2D6	CYP2D6	Definite	CYP2D6	CITALOPRAM		FDA
CYP2D6	CYP2D6	Definite	CYP2D6	HYDROXYCHLOROQUINE		NCI	10848718
CYP2D6	CYP2D6	Definite	CYP2D6	IPRATROPIUM		DTC	22931300
CYP2D6	CYP2D6	Definite	CYP2D6	CHEMBL1169388		DTC
CYP2D6	CYP2D6	Definite	CYP2D6	DESVENLAFAXINE		PharmGKB|FDA	29327975
CYP2D6	CYP2D6	Definite	CYP2D6	MICONAZOLE		DTC
CYP2D6	CYP2D6	Definite	CYP2D6	DEUTETRABENAZINE		PharmGKB|FDA
CYP2D6	CYP2D6	Definite	CYP2D6	CHEMBL1513392		DTC
CYP2D6	CYP2D6	Definite	CYP2D6	HYDRASTININE		DTC
CYP2D6	CYP2D6	Definite	CYP2D6	(S)-ROSCOVITINE		DTC
CYP2D6	CYP2D6	Definite	CYP2D6	BAICALEIN		DTC
CYP2D6	CYP2D6	Definite	CYP2D6	CHEMBL1337960		DTC
CYP2D6	CYP2D6	Definite	CYP2D6	OLOMOUCINE		DTC
CYP2D6	CYP2D6	Definite	CYP2D6	TERAZOSIN		DTC	22931300
CYP2D6	CYP2D6	Definite	CYP2D6	KETOCONAZOLE		DTC	22931300
CYP2D6	CYP2D6	Definite	CYP2D6	GENTAMICIN		DTC	22931300
CYP2D6	CYP2D6	Definite	CYP2D6	TETRACYCLINE		DTC	22931300
CYP2D6	CYP2D6	Definite	CYP2D6	MEPRYLCAINE		DTC
CYP2D6	CYP2D6	Definite	CYP2D6	TAMOXIFEN		FDA
CYP2D6	CYP2D6	Definite	CYP2D6	SULFADOXINE		DTC	22931300
CYP2D6	CYP2D6	Definite	CYP2D6	KAEMPFEROL		DTC
CYP2D6	CYP2D6	Definite	CYP2D6	METHYLPHENIDATE		NCI	10831022
CYP2D6	CYP2D6	Definite	CYP2D6	CHEMBL285932		DTC
CYP2D6	CYP2D6	Definite	CYP2D6	LY-294002		DTC
CYP2D6	CYP2D6	Definite	CYP2D6	CHEMBL601110		DTC
CYP2D6	CYP2D6	Definite	CYP2D6	FLUSPIRILENE		DTC
CYP2D6	CYP2D6	Definite	CYP2D6	DISOPYRAMIDE		PharmGKB
CYP2D6	CYP2D6	Definite	CYP2D6	CARBETAPENTANE		DTC
CYP2D6	CYP2D6	Definite	CYP2D6	CHEMBL336095		DTC
CYP2D6	CYP2D6	Definite	CYP2D6	STREPTOZOCIN		NCI	6305526
CYP2D6	CYP2D6	Definite	CYP2D6	MIDODRINE		DTC	22931300
CYP2D6	CYP2D6	Definite	CYP2D6	MERCAPTOPURINE		DTC	22931300
CYP2D6	CYP2D6	Definite	CYP2D6	ILOPERIDONE		PharmGKB|FDA	23277250
CYP2D6	CYP2D6	Definite	CYP2D6	ACACETIN		DTC
CYP2D6	CYP2D6	Definite	CYP2D6	PHENTOLAMINE		DTC
CYP2D6	CYP2D6	Definite	CYP2D6	(R)-PROCYCLIDINE		DTC
CYP2D6	CYP2D6	Definite	CYP2D6	CYTARABINE		DTC	22931300
CYP2D6	CYP2D6	Definite	CYP2D6	YOHIMBINE		PharmGKB	15289791
CYP2D6	CYP2D6	Definite	CYP2D6	METHAPYRILENE		DTC
CYP2D6	CYP2D6	Definite	CYP2D6	CHLORPHENIRAMINE		PharmGKB
CYP2D6	CYP2D6	Definite	CYP2D6	ACEPROMAZINE		DTC
CYP2D6	CYP2D6	Definite	CYP2D6	MITOMYCIN		DTC	22931300
CYP2D6	CYP2D6	Definite	CYP2D6	DOFETILIDE		DTC	22931300
CYP2D6	CYP2D6	Definite	CYP2D6	NISOLDIPINE		DTC	22931300
CYP2D6	CYP2D6	Definite	CYP2D6	FESOTERODINE		PharmGKB|FDA
CYP2D6	CYP2D6	Definite	CYP2D6	CHEMBL51697		DTC
CYP2D6	CYP2D6	Definite	CYP2D6	PAPAVEROLINE		DTC
CYP2D6	CYP2D6	Definite	CYP2D6	ATOMOXETINE		DTC|FDA
CYP2D6	CYP2D6	Definite	CYP2D6	SR-2640		DTC
CYP2D6	CYP2D6	Definite	CYP2D6	DEQUALINIUM		DTC
CYP2D6	CYP2D6	Definite	CYP2D6	SNC-80		DTC
CYP2D6	CYP2D6	Definite	CYP2D6	PRIDINOL		DTC
CYP2D6	CYP2D6	Definite	CYP2D6	PIPERACETAZINE		DTC
CYP2D6	CYP2D6	Definite	CYP2D6	E-FLUPENTIXOL		PharmGKB
CYP2D6	CYP2D6	Definite	CYP2D6	MANGOSTIN		DTC
CYP2D6	CYP2D6	Definite	CYP2D6	GR-55562		DTC
CYP2D6	CYP2D6	Definite	CYP2D6	TIOTIDINE		DTC
CYP2D6	CYP2D6	Definite	CYP2D6	U-50488 METHANE SULFONATE		DTC
CYP2D6	CYP2D6	Definite	CYP2D6	HALOFANTRINE HYDROCHLORIDE		DTC
CYP2D6	CYP2D6	Definite	CYP2D6	ZIDOVUDINE		DTC	22931300
CYP2D6	CYP2D6	Definite	CYP2D6	OXETHAZAINE		DTC
CYP2D6	CYP2D6	Definite	CYP2D6	N-DESMETHYLCLOZAPINE		DTC
CYP2D6	CYP2D6	Definite	CYP2D6	CHEMBL1269022		DTC
CYP2D6	CYP2D6	Definite	CYP2D6	GABAZINE		DTC
CYP2D6	CYP2D6	Definite	CYP2D6	CHEMBL527271		DTC
CYP2D6	CYP2D6	Definite	CYP2D6	LABETALOL		DTC	22931300
CYP2D6	CYP2D6	Definite	CYP2D6	TRIFLUOPERAZINE		DTC
CYP2D6	CYP2D6	Definite	CYP2D6	PIRINIXIC ACID		DTC
CYP2D6	CYP2D6	Definite	CYP2D6	CHEMBL303336		DTC
CYP2D6	CYP2D6	Definite	CYP2D6	5-(N-METHYL-N-ISOBUTYL)AMILORIDE		DTC
CYP2D6	CYP2D6	Definite	CYP2D6	CHEMBL476501		DTC
CYP2D6	CYP2D6	Definite	CYP2D6	CHEMBL362863		DTC
CYP2D6	CYP2D6	Definite	CYP2D6	FLOXURIDINE		DTC	22931300
CYP2D6	CYP2D6	Definite	CYP2D6	4-CHLOROMERCURIBENZOIC ACID		DTC
CYP2D6	CYP2D6	Definite	CYP2D6	OXOTREMORINE		DTC
CYP2D6	CYP2D6	Definite	CYP2D6	CHEMBL8565		DTC
CYP2D6	CYP2D6	Definite	CYP2D6	CHEMBL598270		DTC
CYP2D6	CYP2D6	Definite	CYP2D6	DIPHENYLENEIODONIUM		DTC
CYP2D6	CYP2D6	Definite	CYP2D6	FINASTERIDE		DTC	22931300
CYP2D6	CYP2D6	Definite	CYP2D6	NICOTINE		PharmGKB	26287939|24611668
CYP2D6	CYP2D6	Definite	CYP2D6	LEVOPROPOXYPHENE NAPSYLATE		DTC
CYP2D6	CYP2D6	Definite	CYP2D6	PIPERIDOLATE		DTC
CYP2D6	CYP2D6	Definite	CYP2D6	BEPRIDIL		PharmGKB	16508157
CYP2D6	CYP2D6	Definite	CYP2D6	METHOTREXATE		DTC	22931300
CYP2D6	CYP2D6	Definite	CYP2D6	CHEMBL189724		DTC
CYP2D6	CYP2D6	Definite	CYP2D6	TICLOPIDINE		DTC	22931300
CYP2D6	CYP2D6	Definite	CYP2D6	CHEMBL552439		DTC
CYP2D6	CYP2D6	Definite	CYP2D6	RISPERIDONE		DTC|FDA
CYP2D6	CYP2D6	Definite	CYP2D6	CLORGILINE		DTC
CYP2D6	CYP2D6	Definite	CYP2D6	LEUPROLIDE		DTC	22931300
CYP2D6	CYP2D6	Definite	CYP2D6	ENOXOLONE		DTC	22931300
CYP2D6	CYP2D6	Definite	CYP2D6	IMETIT		DTC
CYP2D6	CYP2D6	Definite	CYP2D6	PRIDINOL METHANESULFONATE		DTC
CYP2D6	CYP2D6	Definite	CYP2D6	MESTRANOL		DTC	22931300
CYP2D6	CYP2D6	Definite	CYP2D6	FLAVOXATE		DTC
CYP2D6	CYP2D6	Definite	CYP2D6	CHEMBL26320		DTC
CYP2D6	CYP2D6	Definite	CYP2D6	OFLOXACIN		DTC	22931300
CYP2D6	CYP2D6	Definite	CYP2D6	CHEMBL1214274		DTC
CYP2D6	CYP2D6	Definite	CYP2D6	BUTACAINE		DTC
CYP2D6	CYP2D6	Definite	CYP2D6	ASPIRIN		DTC|PharmGKB	22931300
CYP2D6	CYP2D6	Definite	CYP2D6	VENLAFAXINE		FDA
CYP2D6	CYP2D6	Definite	CYP2D6	CHEMBL1593717		DTC
CYP2D6	CYP2D6	Definite	CYP2D6	TRACAZOLATE		DTC
CYP2D6	CYP2D6	Definite	CYP2D6	BROMPERIDOL		DTC
CYP2D6	CYP2D6	Definite	CYP2D6	CHEMBL68131		DTC
CYP2D6	CYP2D6	Definite	CYP2D6	DIMETACRINE		DTC
CYP2D6	CYP2D6	Definite	CYP2D6	DIMENHYDRINATE		DTC
CYP2D6	CYP2D6	Definite	CYP2D6	CHEMBL112816		DTC
CYP2D6	CYP2D6	Definite	CYP2D6	CHLORHEXIDINE		DTC
CYP2D6	CYP2D6	Definite	CYP2D6	CHEMBL35482		DTC
CYP2D6	CYP2D6	Definite	CYP2D6	CLEMIZOLE		DTC
CYP2D6	CYP2D6	Definite	CYP2D6	IBUDILAST		DTC
CYP2D6	CYP2D6	Definite	CYP2D6	CHEMBL250428		DTC
CYP2D6	CYP2D6	Definite	CYP2D6	FLUVASTATIN		PharmGKB
CYP2D6	CYP2D6	Definite	CYP2D6	DAPSONE		DTC	22931300
CYP2D6	CYP2D6	Definite	CYP2D6	PROGESTERONE		DTC	22931300
CYP2D6	CYP2D6	Definite	CYP2D6	TRIFLUPERIDOL		DTC
CYP2D6	CYP2D6	Definite	CYP2D6	CP-339818		DTC
CYP2D6	CYP2D6	Definite	CYP2D6	(S)-ALAPROCLATE		DTC
CYP2D6	CYP2D6	Definite	CYP2D6	IOBENGUANE		DTC
CYP2D6	CYP2D6	Definite	CYP2D6	HYPERICIN		NCI	15100173
CYP2D6	CYP2D6	Definite	CYP2D6	ROPINIROLE		DTC
CYP2D6	CYP2D6	Definite	CYP2D6	CIRAZOLINE		DTC
CYP2D6	CYP2D6	Definite	CYP2D6	LANSOPRAZOLE SULFIDE		DTC
CYP2D6	CYP2D6	Definite	CYP2D6	VESAMICOL		DTC
CYP2D6	CYP2D6	Definite	CYP2D6	NAPROXEN		DTC	22931300
CYP2D6	CYP2D6	Definite	CYP2D6	IMAZODAN		DTC
CYP2D6	CYP2D6	Definite	CYP2D6	DILTIAZEM		DTC	22931300
CYP2D6	CYP2D6	Definite	CYP2D6	CHEMBL1256746		DTC
CYP2D6	CYP2D6	Definite	CYP2D6	BUSULFAN		DTC	22931300
CYP2D6	CYP2D6	Definite	CYP2D6	SULFAPHENAZOLE		DTC	22931300
CYP2D6	CYP2D6	Definite	CYP2D6	VALBENAZINE		PharmGKB|FDA
CYP2D6	CYP2D6	Definite	CYP2D6	METHAPHIT		DTC
CYP2D6	CYP2D6	Definite	CYP2D6	CHEMBL455185		DTC
CYP2D6	CYP2D6	Definite	CYP2D6	ARBACLOFEN		DTC
CYP2D6	CYP2D6	Definite	CYP2D6	DIPHENIDOL		DTC
CYP2D6	CYP2D6	Definite	CYP2D6	CHEMBL101510		DTC
CYP2D6	CYP2D6	Definite	CYP2D6	ETICLOPRIDE		DTC
CYP2D6	CYP2D6	Definite	CYP2D6	ANTAZOLINE		DTC
CYP2D6	CYP2D6	Definite	CYP2D6	CARMUSTINE		DTC	22931300
CYP2D6	CYP2D6	Definite	CYP2D6	QUINIDINE		PharmGKB|FDA
CYP2D6	CYP2D6	Definite	CYP2D6	QUININE		PharmGKB
CYP2D6	CYP2D6	Definite	CYP2D6	(-)-PROPANOLOL		DTC
CYP2D6	CYP2D6	Definite	CYP2D6	ERLOTINIB		NCI	17575239
CYP2D6	CYP2D6	Definite	CYP2D6	PIRENZEPINE		DTC
CYP2D6	CYP2D6	Definite	CYP2D6	(S)-PROMETHAZINE		DTC
CYP2D6	CYP2D6	Definite	CYP2D6	GLYBURIDE		DTC
CYP2D6	CYP2D6	Definite	CYP2D6	7-HYDROXYCHLORPROMAZINE		DTC
CYP2D6	CYP2D6	Definite	CYP2D6	RANOLAZINE		PharmGKB
CYP2D6	CYP2D6	Definite	CYP2D6	CHEMBL22778		DTC
CYP2D6	CYP2D6	Definite	CYP2D6	CHEMBL27006		DTC
CYP2D6	CYP2D6	Definite	CYP2D6	DIHYDREXIDINE		DTC
CYP2D6	CYP2D6	Definite	CYP2D6	EMBELIN		DTC
CYP2D6	CYP2D6	Definite	CYP2D6	SPARTEINE		PharmGKB	8563771|8287064|1844820|8946471|10471060|9241659|15618746|8530011|17001296|9089660|9511177|8655150|18784265|7845481|2211621|17460029
CYP2D6	CYP2D6	Definite	CYP2D6	NILUTAMIDE		DTC	22931300
CYP2D6	CYP2D6	Definite	CYP2D6	MENTHOFURAN		DTC	22931300
CYP2D6	CYP2D6	Definite	CYP2D6	GALANGIN		DTC
CYP2D6	CYP2D6	Definite	CYP2D6	ETHYLMORPHINE		PharmGKB
CYP2D6	CYP2D6	Definite	CYP2D6	CHEMBL309760		DTC
CYP2D6	CYP2D6	Definite	CYP2D6	ESOMEPRAZOLE		PharmGKB
CYP2D6	CYP2D6	Definite	CYP2D6	CHEMBL291536		DTC
CYP2D6	CYP2D6	Definite	CYP2D6	CYCLOPHOSPHAMIDE		DTC	22931300
CYP2D6	CYP2D6	Definite	CYP2D6	TESTOSTERONE		DTC	22931300
CYP2D6	CYP2D6	Definite	CYP2D6	OXATOMIDE		DTC
CYP2D6	CYP2D6	Definite	CYP2D6	PROMETHAZINE		PharmGKB	17986163
CYP2D6	CYP2D6	Definite	CYP2D6	SIMVASTATIN		DTC	22931300
CYP2D6	CYP2D6	Definite	CYP2D6	METHANTHELINE		DTC
CYP2D6	CYP2D6	Definite	CYP2D6	DIGOXIN		DTC	22931300
CYP2D6	CYP2D6	Definite	CYP2D6	FELBAMATE		DTC	22931300
CYP2D6	CYP2D6	Definite	CYP2D6	CARBAMAZEPINE		DTC	22931300
CYP2D6	CYP2D6	Definite	CYP2D6	OMEPRAZOLE		DTC	22931300
CYP2D6	CYP2D6	Definite	CYP2D6	KENPAULLONE		DTC
CYP2D6	CYP2D6	Definite	CYP2D6	CHEMBL389390		DTC
CYP2D6	CYP2D6	Definite	CYP2D6	CYCLOSPORINE		DTC	22931300
CYP2D6	CYP2D6	Definite	CYP2D6	COUMARIN		DTC	22931300
CYP2D6	CYP2D6	Definite	CYP2D6	ONDANSETRON		FDA
CYP2D6	CYP2D6	Definite	CYP2D6	CHEMBL244707		DTC
CYP2D6	CYP2D6	Definite	CYP2D6	PYRIDOSTIGMINE		DTC	22931300
CYP2D6	CYP2D6	Definite	CYP2D6	RIFAMPIN		DTC	22931300
CYP2D6	CYP2D6	Definite	CYP2D6	MIANSERIN		PharmGKB	14652703|1527229|8062494|9408809
CYP2D6	CYP2D6	Definite	CYP2D6	FLUPHENAZINE		DTC|PharmGKB
CYP2D6	CYP2D6	Definite	CYP2D6	MECAMYLAMINE		DTC	22931300
CYP2D6	CYP2D6	Definite	CYP2D6	NEOSTIGMINE BROMIDE		DTC	22931300
CYP2D6	CYP2D6	Definite	CYP2D6	EBSELEN		DTC
CYP2D6	CYP2D6	Definite	CYP2D6	DENATONIUM BENZOATE		DTC
CYP2D6	CYP2D6	Definite	CYP2D6	LIDOFLAZINE		DTC
CYP2D6	CYP2D6	Definite	CYP2D6	CHEMBL546597		DTC
CYP2D6	CYP2D6	Definite	CYP2D6	ETIDRONIC ACID		DTC	22931300
CYP2D6	CYP2D6	Definite	CYP2D6	FERROUS SULFATE		DTC	22931300
CYP2D6	CYP2D6	Definite	CYP2D6	PROADIFEN		DTC
CYP2D6	CYP2D6	Definite	CYP2D6	TROGLITAZONE		DTC	22931300
CYP2D6	CYP2D6	Definite	CYP2D6	4',7-DIMETHOXY-5-HYDROXYGENISTEIN		DTC
CYP2D6	CYP2D6	Definite	CYP2D6	DACARBAZINE		DTC	22931300
CYP2D6	CYP2D6	Definite	CYP2D6	CHEMBL279556		DTC
CYP2D6	CYP2D6	Definite	CYP2D6	TRIAMCINOLONE		DTC	22931300
CYP2D6	CYP2D6	Definite	CYP2D6	CHEMBL1520837		DTC
CYP2D6	CYP2D6	Definite	CYP2D6	CHEMBL277525		DTC
CYP2D6	CYP2D6	Definite	CYP2D6	CHEMBL338115		DTC
CYP2D6	CYP2D6	Definite	CYP2D6	ESTRADIOL		DTC	22931300
CYP2D6	CYP2D6	Definite	CYP2D6	NIGULDIPINE		DTC
CYP2D6	CYP2D6	Definite	CYP2D6	CLOPIDOGREL		DTC
CYP2D6	CYP2D6	Definite	CYP2D6	NIFEDIPINE		DTC	22931300
CYP2D6	CYP2D6	Definite	CYP2D6	ARASERTACONAZOLE		DTC
CYP2D6	CYP2D6	Definite	CYP2D6	CHEMBL1371696		DTC
CYP2D6	CYP2D6	Definite	CYP2D6	TROPISETRON		PharmGKB	12728290|12065557
CYP2D6	CYP2D6	Definite	CYP2D6	NALBUPHINE		DTC	22931300
CYP2D6	CYP2D6	Definite	CYP2D6	HARMAN		DTC
CYP2D6	CYP2D6	Definite	CYP2D6	DACTINOMYCIN		DTC	22931300
CYP2D6	CYP2D6	Definite	CYP2D6	BUCLADESINE		DTC
CYP2D6	CYP2D6	Definite	CYP2D6	PSORALEN		DTC
CYP2D6	CYP2D6	Definite	CYP2D6	DANAZOL		DTC	22931300
CYP2D6	CYP2D6	Definite	CYP2D6	PIROXICAM		DTC	22931300
CYP2D6	CYP2D6	Definite	CYP2D6	NIMESULIDE		DTC	22931300
CYP2D6	CYP2D6	Definite	CYP2D6	CLOZAPINE		FDA
CYP2D6	CYP2D6	Definite	CYP2D6	TRAMADOL		FDA
CYP2D6	CYP2D6	Definite	CYP2D6	LAMOTRIGINE		DTC	22931300
CYP2D6	CYP2D6	Definite	CYP2D6	AMPHOTERICIN B		DTC	22931300
CYP2D6	CYP2D6	Definite	CYP2D6	BERGAMOTTIN		DTC
CYP2D6	CYP2D6	Definite	CYP2D6	SB-202190		DTC
CYP2D6	CYP2D6	Definite	CYP2D6	SPICLOMAZINE		DTC
CYP2D6	CYP2D6	Definite	CYP2D6	MIBEFRADIL		DTC
CYP2D6	CYP2D6	Definite	CYP2D6	CEFOPERAZONE		DTC	22931300
CYP2D6	CYP2D6	Definite	CYP2D6	XYLOMETAZOLINE		DTC
CYP2D6	CYP2D6	Definite	CYP2D6	E324		DTC
CYP2D6	CYP2D6	Definite	CYP2D6	MENADIONE		DTC
CYP2D6	CYP2D6	Definite	CYP2D6	LIOTHYRONINE		DTC	22931300
CYP2D6	CYP2D6	Definite	CYP2D6	FLUPIRTINE		DTC
CYP2D6	CYP2D6	Definite	CYP2D6	MINOXIDIL		DTC	22931300
CYP2D6	CYP2D6	Definite	CYP2D6	CARBETAPENTANE CITRATE		DTC
CYP2D6	CYP2D6	Definite	CYP2D6	BENZYDAMINE		DTC
CYP2D6	CYP2D6	Definite	CYP2D6	CHEMBL585045		DTC
CYP2D6	CYP2D6	Definite	CYP2D6	CHEMBL188641		DTC
CYP2D6	CYP2D6	Definite	CYP2D6	IPRONIAZID		DTC	22931300
CYP2D6	CYP2D6	Definite	CYP2D6	ESCITALOPRAM		FDA
MICB	MICB	Definite	MICB	RIBAVIRIN		PharmGKB
MRM2	MRM2	Definite	MRM2	PLAZOMICIN		TTD
TLR9	TLR9	Definite	TLR9	AGATOLIMOD	inhibitor|agonist	TALC|TdgClinicalTrial|GuideToPharmacology
TLR9	TLR9	Definite	TLR9	LITENIMOD		TTD
TLR9	TLR9	Definite	TLR9	CHLOROQUINE	inhibitor	DTC	19949061|14579285|15762869|15307186|16849519|16148144
TLR9	TLR9	Definite	TLR9	CHEMBL1520346		DTC
TLR9	TLR9	Definite	TLR9	DEMETHOXYCURCUMIN		DTC
TLR9	TLR9	Definite	TLR9	HYDROXYCHLOROQUINE SULFATE	antagonist	ChemblInteractions
TLR9	TLR9	Definite	TLR9	HYDROXYCHLOROQUINE	antagonist	TdgClinicalTrial|GuideToPharmacology	14579285|18220957
TLR9	TLR9	Definite	TLR9	CHEMBL505670		DTC
TLR9	TLR9	Definite	TLR9	THIMEROSAL		DTC
TLR9	TLR9	Definite	TLR9	EMD-1201081		TTD
TLR9	TLR9	Definite	TLR9	CHEMBL429095		DTC
TLR9	TLR9	Definite	TLR9	GNKG-168		TTD
TLR9	TLR9	Definite	TLR9	ALEXIDINE HYDROCHLORIDE		DTC
TLR9	TLR9	Definite	TLR9	AGATOLIMOD SODIUM	agonist	ChemblInteractions
TLR9	TLR9	Definite	TLR9	TILSOTOLIMOD		TTD
TLR9	TLR9	Definite	TLR9	LEFITOLIMOD		TTD
MAPK3	MAPK3	Definite	MAPK3	CHEMBL2333548		DTC
MAPK3	MAPK3	Definite	MAPK3	ETOPOSIDE		DTC	23999041
MAPK3	MAPK3	Definite	MAPK3	CHEMBL329785		DTC	22982122
MAPK3	MAPK3	Definite	MAPK3	YUANHUADINE		DTC	21916433
MAPK3	MAPK3	Definite	MAPK3	CIMIRACEMATE A		DTC	19835377
MAPK3	MAPK3	Definite	MAPK3	MK-8353	inhibitor	ChemblInteractions|GuideToPharmacology
MAPK3	MAPK3	Definite	MAPK3	CHEMBL29197		DTC	17681471
MAPK3	MAPK3	Definite	MAPK3	CHEMBL2088730		DTC	22982122
MAPK3	MAPK3	Definite	MAPK3	MADOLIN A		DTC
MAPK3	MAPK3	Definite	MAPK3	VOLVALERENAL D		DTC
MAPK3	MAPK3	Definite	MAPK3	CHEMBL389685		DTC	26492576
MAPK3	MAPK3	Definite	MAPK3	OPHIOBOLIN O		DTC	22130129
MAPK3	MAPK3	Definite	MAPK3	ULIXERTINIB	inhibitor	ChemblInteractions|GuideToPharmacology|TTD	28939558
MAPK3	MAPK3	Definite	MAPK3	ARISTOYUNNOLIN A		DTC
MAPK3	MAPK3	Definite	MAPK3	DEMETHYLWEDELOLACTONE		DTC	22926226
MAPK3	MAPK3	Definite	MAPK3	PRASTERONE		NCI	17102100
MAPK3	MAPK3	Definite	MAPK3	RAVOXERTINIB	inhibitor	ChemblInteractions|GuideToPharmacology|TTD	25320010
MAPK3	MAPK3	Definite	MAPK3	COMBRETASTATIN A4		DTC	22982122
MAPK3	MAPK3	Definite	MAPK3	CYCLOPHOSPHAMIDE		NCI	15193230
MAPK3	MAPK3	Definite	MAPK3	NITROGLYCERIN		NCI	16612556
MAPK3	MAPK3	Definite	MAPK3	GAMBOGIC ACID		DTC	17911251
MAPK3	MAPK3	Definite	MAPK3	ANDROSTANOLONE		NCI	16773205
MAPK3	MAPK3	Definite	MAPK3	WEDELOLACTONE		DTC	22926226
MAPK3	MAPK3	Definite	MAPK3	PHENETHYLISOTHIOCYANATE		DTC	22607231
MAPK3	MAPK3	Definite	MAPK3	SORAFENIB		PharmGKB	20124951
MAPK3	MAPK3	Definite	MAPK3	CHEMBL2063687		DTC	22283430
MAPK3	MAPK3	Definite	MAPK3	CHEMBL35482		DTC
MAPK3	MAPK3	Definite	MAPK3	PESUDOGINSENOSIDE RP1 METHYL ESTER		DTC	20951582
MAPK3	MAPK3	Definite	MAPK3	CHEMBL2333543		DTC
MAPK3	MAPK3	Definite	MAPK3	ARISTOLACTONE		DTC
MAPK3	MAPK3	Definite	MAPK3	QUERCETIN		NCI	17045724
MAPK3	MAPK3	Definite	MAPK3	CHEMBL269881		DTC
MAPK3	MAPK3	Definite	MAPK3	WITHAFERIN A		DTC	20726569
MAPK3	MAPK3	Definite	MAPK3	CHEMBL2063681		DTC	22283430
MAPK3	MAPK3	Definite	MAPK3	CHEMBL2088731		DTC	22982122
MAPK3	MAPK3	Definite	MAPK3	XANTHOHUMOL		DTC	22111577
MAPK3	MAPK3	Definite	MAPK3	SPINASAPONIN A METHYL ESTER		DTC	20951582
MAPK3	MAPK3	Definite	MAPK3	MADOLIN U		DTC
MAPK3	MAPK3	Definite	MAPK3	MADOLIN T		DTC
MAPK3	MAPK3	Definite	MAPK3	GAMBOGIC AMIDE		DTC	17911251
CYP17A1	CYP17A1	Definite	CYP17A1	ORTERONEL	inhibitor	TdgClinicalTrial|ChemblInteractions|CancerCommons|TTD
CYP17A1	CYP17A1	Definite	CYP17A1	GALETERONE	inhibitor	TdgClinicalTrial|ChemblInteractions|GuideToPharmacology
CYP17A1	CYP17A1	Definite	CYP17A1	ABIRATERONE	inhibitor	TdgClinicalTrial|CGI|GuideToPharmacology|PharmGKB|TTD	20645691|25157341
CYP17A1	CYP17A1	Definite	CYP17A1	ABIRATERONE ACETATE	inhibitor	ChemblInteractions
CYP17A1	CYP17A1	Definite	CYP17A1	CFG-920		TTD
CYP17A1	CYP17A1	Definite	CYP17A1	ENZALUTAMIDE		CGI
CYP17A1	CYP17A1	Definite	CYP17A1	SEVITERONEL		TTD
CYP17A1	CYP17A1	Definite	CYP17A1	ZYTIGA	inhibitor	CancerCommons
PSORS1C1	PSORS1C1	Definite	PSORS1C1	CARBOPLATIN		PharmGKB	31616045
PSORS1C1	PSORS1C1	Definite	PSORS1C1	ETANERCEPT		PharmGKB
PSORS1C1	PSORS1C1	Definite	PSORS1C1	GEMCITABINE		PharmGKB	31616045
PSORS1C1	PSORS1C1	Definite	PSORS1C1	ALLOPURINOL		PharmGKB	21801394|29193002
SLCO4C1	SLCO4C1	Definite	SLCO4C1	DIGOXIN		TTD
POU5F1	POU5F1	Definite	POU5F1	PHENYTOIN		PharmGKB
POU5F1	POU5F1	Definite	POU5F1	ALCOHOL		NCI	16112835
POU5F1	POU5F1	Definite	POU5F1	ALLOPURINOL		PharmGKB	21801394
POU5F1	POU5F1	Definite	POU5F1	CARBAMAZEPINE		PharmGKB
BRD2	BRD2	Definite	BRD2	TRIAZOLAM		DTC	22137933
BRD2	BRD2	Definite	BRD2	MOLIBRESIB	inhibitor	GuideToPharmacology
BRD2	BRD2	Definite	BRD2	ALPRAZOLAM		DTC	22137933
BRD2	BRD2	Definite	BRD2	ACETAMINOPHEN		DTC	22136404
BRD2	BRD2	Definite	BRD2	CHEMBL52030		DTC	22137933
BRD2	BRD2	Definite	BRD2	BIRABRESIB		TTD
BRD2	BRD2	Definite	BRD2	CHEMBL2153434	inhibitor	GuideToPharmacology
BRD2	BRD2	Definite	BRD2	MIDAZOLAM		DTC	22137933
BRD2	BRD2	Definite	BRD2	ABBV-744		TTD
CHRNA5	CHRNA5	Definite	CHRNA5	ALCOHOL		PharmGKB	23641218|19270242
CHRNA5	CHRNA5	Definite	CHRNA5	POZANICLINE	partial agonist	ChemblInteractions
CHRNA5	CHRNA5	Definite	CHRNA5	COCAINE		PharmGKB	32152934
CHRNA5	CHRNA5	Definite	CHRNA5	COTININE		PharmGKB
KCNG2	KCNG2	Definite	KCNG2	TEDISAMIL	blocker	ChemblInteractions
KCNG2	KCNG2	Definite	KCNG2	DALFAMPRIDINE	blocker	ChemblInteractions
KCNG2	KCNG2	Definite	KCNG2	NERISPIRDINE	blocker	ChemblInteractions
KCNG2	KCNG2	Definite	KCNG2	GUANIDINE HYDROCHLORIDE	blocker	ChemblInteractions
NDUFA13	NDUFA13	Definite	NDUFA13	NV-128	inhibitor	ChemblInteractions
NDUFA13	NDUFA13	Definite	NDUFA13	METFORMIN HYDROCHLORIDE	inhibitor	ChemblInteractions
NDUFA13	NDUFA13	Definite	NDUFA13	ME-344	inhibitor	ChemblInteractions
XPNPEP3	XPNPEP3	Definite	XPNPEP3	TOSEDOSTAT	inhibitor	ChemblInteractions
PTPA	PTPA	Definite	PTPA	LB-100		TTD
CYP7B1	CYP7B1	Definite	CYP7B1	DIAZOXIDE		NCI	8301566
CYP7B1	CYP7B1	Definite	CYP7B1	ACETAMINOPHEN		NCI	2242029
CYP7B1	CYP7B1	Definite	CYP7B1	ADRIAMYCIN		NCI	8162589
CYP7B1	CYP7B1	Definite	CYP7B1	GINKGO		NCI	15901353
CYP7B1	CYP7B1	Definite	CYP7B1	LYCOPENE		NCI	14640578
CYP7B1	CYP7B1	Definite	CYP7B1	METHIMAZOLE		NCI	10053173
CYP7B1	CYP7B1	Definite	CYP7B1	FADROZOLE		NCI	14720586
CYP7B1	CYP7B1	Definite	CYP7B1	SPIRONOLACTONE		NCI	976190
CYP7B1	CYP7B1	Definite	CYP7B1	STREPTOZOCIN		NCI	8435090
CYP7B1	CYP7B1	Definite	CYP7B1	SAQUINAVIR		NCI	12461038
ACE	ACE	Definite	ACE	CANDOXATRIL	inhibitor	TdgClinicalTrial|TEND	16642666|11300648
ACE	ACE	Definite	ACE	AMLODIPINE		PharmGKB	20577119
ACE	ACE	Definite	ACE	CHLORTHALIDONE		PharmGKB	20577119
ACE	ACE	Definite	ACE	SPIRONOLACTONE		PharmGKB	15121491
ACE	ACE	Definite	ACE	FOSINOPRIL SODIUM	inhibitor	ChemblInteractions
ACE	ACE	Definite	ACE	RESCINNAMINE	inhibitor	TdgClinicalTrial|TEND|TTD	16431399|11752352|17139284|17016423
ACE	ACE	Definite	ACE	TORSEMIDE		PharmGKB	20877298
ACE	ACE	Definite	ACE	ENALAPRIL MALEATE	inhibitor	ChemblInteractions
ACE	ACE	Definite	ACE	ZOFENOPRIL	inhibitor	GuideToPharmacology	17355163
ACE	ACE	Definite	ACE	MOEXIPRIL	inhibitor	TdgClinicalTrial|TEND|GuideToPharmacology|TTD	11929321|15286086|7473177|11752352
ACE	ACE	Definite	ACE	SILDENAFIL		PharmGKB	12837457
ACE	ACE	Definite	ACE	BENAZEPRIL	inhibitor	TdgClinicalTrial|TEND|GuideToPharmacology|PharmGKB|TTD	19290794|11929321|9535416|8986921|15773232|11217909|10335726|9726242|15788353|11752352|9270093|15967849|11007831|10999650
ACE	ACE	Definite	ACE	FOSINOPRIL	inhibitor	TdgClinicalTrial|TEND|GuideToPharmacology|TTD	11030016|11752352|2836111|11329095
ACE	ACE	Definite	ACE	CAPTOPRIL	inhibitor	TdgClinicalTrial|ChemblInteractions|NCI|TEND|GuideToPharmacology|PharmGKB|TTD	27546928|2839262|16889963|2442780|3937925|11030016|11929321|3320343|19286758|17618628|3325392|3038284|15236580|20830509|20014331|7042175|6275810|11752352|9869506|12424228|12489813|2875891|9551410|9069453|9863143|8864563
ACE	ACE	Definite	ACE	SPIRAPRIL	inhibitor	TdgClinicalTrial|TEND|GuideToPharmacology|TTD	11929321|16126915|12613273|11752352|20524801
ACE	ACE	Definite	ACE	RAMIPRIL	inhibitor	TdgClinicalTrial|ChemblInteractions|TEND|GuideToPharmacology|PharmGKB|TTD	11030016|11929321|16398929|11752352
ACE	ACE	Definite	ACE	DESERPIDINE		TdgClinicalTrial|TEND|TTD
ACE	ACE	Definite	ACE	LISINOPRIL	inhibitor	TdgClinicalTrial|TEND|GuideToPharmacology|PharmGKB|TTD	19290794|11030016|11929321|9535416|17618628|9506845|8986921|15773232|11217909|10335726|20577119|9726242|11752352|9869506|9270093|15967849|11007831|10999650
ACE	ACE	Definite	ACE	QUINAPRIL	inhibitor	TdgClinicalTrial|TEND|PharmGKB|TTD	11929321|11817979|3020249|16116691|11752352
ACE	ACE	Definite	ACE	BUMETANIDE		PharmGKB	20877298
ACE	ACE	Definite	ACE	IMIDAPRILAT	inhibitor	GuideToPharmacology
ACE	ACE	Definite	ACE	NITROPRUSSIDE		PharmGKB	10334805
ACE	ACE	Definite	ACE	FLUVASTATIN		PharmGKB	11545752|10636265
ACE	ACE	Definite	ACE	BENAZEPRIL HYDROCHLORIDE	inhibitor	ChemblInteractions
ACE	ACE	Definite	ACE	SERTRALINE		PharmGKB	27262302
ACE	ACE	Definite	ACE	PERINDOPRIL	inhibitor	TdgClinicalTrial|TEND|GuideToPharmacology|PharmGKB|TTD	11929321|16370923|15788353|11752352|19379059|11007831
ACE	ACE	Definite	ACE	TRANDOLAPRIL	inhibitor	TdgClinicalTrial|ChemblInteractions|TEND|GuideToPharmacology|TTD	11030016|11929321|11752352
ACE	ACE	Definite	ACE	ENALAPRIL	inhibitor	TdgClinicalTrial|TEND|GuideToPharmacology|PharmGKB|TTD	12799093|17618628|9661139|16424790|15236580|8986921|10880412|8538349|11752352
ACE	ACE	Definite	ACE	CILAZAPRIL	inhibitor	TdgClinicalTrial|TEND|GuideToPharmacology|PharmGKB|TTD	19290794|9535416|10398211|8986921|15773232|11217909|10205231|10335726|1382157|1382161|9726242|11752352|9270093|10446934|18423812|15967849|11007831|10999650
ACE	ACE	Definite	ACE	METOPROLOL		PharmGKB	11593098|8728305|12844134
ACE	ACE	Definite	ACE	LISINOPRIL HYDRATE	inhibitor	ChemblInteractions
ACE	ACE	Definite	ACE	INDOMETHACIN		NCI	3937925
ACE	ACE	Definite	ACE	CANDESARTAN		PharmGKB	11593098|12065207
ACE	ACE	Definite	ACE	VORINOSTAT		DTC	24074025
ACE	ACE	Definite	ACE	ACETYLCHOLINE		PharmGKB	10334805
ACE	ACE	Definite	ACE	FLUOXETINE		PharmGKB	27262302
ACE	ACE	Definite	ACE	SPIRAPRILAT	inhibitor	GuideToPharmacology
ACE	ACE	Definite	ACE	IMIDAPRIL	inhibitor	GuideToPharmacology
ACE	ACE	Definite	ACE	HYDROCHLOROTHIAZIDE		PharmGKB|TTD	21269061|12371972|12623934
ACE	ACE	Definite	ACE	MOEXIPRIL HYDROCHLORIDE	inhibitor	ChemblInteractions
ACE	ACE	Definite	ACE	QUINAPRILAT	inhibitor	GuideToPharmacology
ACE	ACE	Definite	ACE	FUROSEMIDE		PharmGKB	20877298
ACE	ACE	Definite	ACE	ASPIRIN		PharmGKB	18727619
ACE	ACE	Definite	ACE	PERINDOPRIL ERBUMINE	inhibitor	ChemblInteractions
ACE	ACE	Definite	ACE	DELAPRIL		TTD
ACE	ACE	Definite	ACE	FASIDOTRILAT	inhibitor	GuideToPharmacology
ACE	ACE	Definite	ACE	TRANDOLAPRILAT	inhibitor	GuideToPharmacology
ACE	ACE	Definite	ACE	BUPROPION		PharmGKB	22947179
ACE	ACE	Definite	ACE	GALLOPAMIL		TTD
ACE	ACE	Definite	ACE	ILEPATRIL		TdgClinicalTrial
ACE	ACE	Definite	ACE	SPIRAPRIL HYDROCHLORIDE	inhibitor	ChemblInteractions
ACE	ACE	Definite	ACE	ENALAPRILAT	inhibitor	GuideToPharmacology|TTD
ACE	ACE	Definite	ACE	ALACEPRIL		TTD
ACE	ACE	Definite	ACE	PERINDOPRILAT	inhibitor	GuideToPharmacology
ACE	ACE	Definite	ACE	QUINAPRIL HYDROCHLORIDE	inhibitor	ChemblInteractions
ACE	ACE	Definite	ACE	PERINDOPRIL ARGININE	inhibitor	ChemblInteractions
ACE	ACE	Definite	ACE	ATENOLOL		PharmGKB	11593098|8728305|12844134
ACE	ACE	Definite	ACE	BENAZEPRILAT	inhibitor	GuideToPharmacology
ACE	ACE	Definite	ACE	PRAVASTATIN		PharmGKB	11545752|16103896|10636265|12695469
ACE	ACE	Definite	ACE	VASOPRESSIN		NCI	6289972
ACE	ACE	Definite	ACE	ATORVASTATIN		PharmGKB	16116691
ACE	ACE	Definite	ACE	GEMFIBROZIL		PharmGKB	12123487
ACE	ACE	Definite	ACE	IRBESARTAN		PharmGKB	11593098|12065207
ACE	ACE	Definite	ACE	RAMIPRILAT	inhibitor	GuideToPharmacology
ACE	ACE	Definite	ACE	CGS-27023A		DTC	24074025
ACE	ACE	Definite	ACE	FASIDOTRIL	inhibitor	GuideToPharmacology
MPL	MPL	Definite	MPL	ROMIPLOSTIM	agonist	TdgClinicalTrial|ChemblInteractions|TEND|GuideToPharmacology|TTD	23250851
MPL	MPL	Definite	MPL	AVATROMBOPAG	agonist	ChemblInteractions|GuideToPharmacology|TTD
MPL	MPL	Definite	MPL	PICTILISIB		JAX-CKB	24251790
MPL	MPL	Definite	MPL	LUSUTROMBOPAG	agonist	GuideToPharmacology|TTD	22859611|29274361|26666417
MPL	MPL	Definite	MPL	MK-2206		JAX-CKB	23748344
MPL	MPL	Definite	MPL	ELTROMBOPAG OLAMINE	agonist	ChemblInteractions
MPL	MPL	Definite	MPL	ELTROMBOPAG	agonist	TdgClinicalTrial|TEND|GuideToPharmacology|TTD	19642221
MPL	MPL	Definite	MPL	PROMACTA		TTD
MPL	MPL	Definite	MPL	RUXOLITINIB		JAX-CKB	24251790
MPL	MPL	Definite	MPL	EVEROLIMUS		JAX-CKB	21725052
MPL	MPL	Definite	MPL	DACTOLISIB		JAX-CKB	24251790
TUBB	TUBB	Definite	TUBB	PACLITAXEL	inhibitor	DTC|ChemblInteractions|GuideToPharmacology|TTD	23631389|25369367|25768699|24457094|22595423|23313639|17887662|23387901|19758808|23725535|24953821
TUBB	TUBB	Definite	TUBB	NOCODAZOLE		DTC	21194809|25815147|25369367|25262051|23313639
TUBB	TUBB	Definite	TUBB	CABAZITAXEL	inhibitor	ChemblInteractions|GuideToPharmacology
TUBB	TUBB	Definite	TUBB	VINBLASTINE	adduct|inhibitor	DTC|GuideToPharmacology	9664292|23708010|1818332|18220533|15579115|23916255|14619954
TUBB	TUBB	Definite	TUBB	INDIBULIN	inhibitor	ChemblInteractions
TUBB	TUBB	Definite	TUBB	VORINOSTAT		DTC	20491440
TUBB	TUBB	Definite	TUBB	ROSABULIN		TTD
TUBB	TUBB	Definite	TUBB	IXABEPILONE	inhibitor	ChemblInteractions|GuideToPharmacology
TUBB	TUBB	Definite	TUBB	VINORELBINE	antagonist|inhibitor	DTC	25768699|20403547|7740336|17139284|17016423|9515574
TUBB	TUBB	Definite	TUBB	FOSBRETABULIN DISODIUM	inhibitor	ChemblInteractions
TUBB	TUBB	Definite	TUBB	FOSBRETABULIN TROMETHAMINE		ChemblInteractions
TUBB	TUBB	Definite	TUBB	VINCRISTINE	inhibitor	DTC|GuideToPharmacology|TTD	16539377|19277662|17139284|21664138|23916255|17016423|20442307
TUBB	TUBB	Definite	TUBB	VERUBULIN		ChemblInteractions|TTD
TUBB	TUBB	Definite	TUBB	LISAVANBULIN		TTD
TUBB	TUBB	Definite	TUBB	PACLITAXEL POLIGLUMEX		ChemblInteractions
TUBB	TUBB	Definite	TUBB	BRENTUXIMAB VEDOTIN	inhibitor	ChemblInteractions
TUBB	TUBB	Definite	TUBB	VINFLUNINE	inhibitor	ChemblInteractions	8663038|28042310|19455242
TUBB	TUBB	Definite	TUBB	COLCHICINE	binder|inhibitor	DTC|ChemblInteractions|GuideToPharmacology	23750455|20814887|25805446|22814904|25151572|24502232|20586571|25061803|25937236|16166440|24773591|19527023|25938266|15720245
TUBB	TUBB	Definite	TUBB	LEXIBULIN	inhibitor	ChemblInteractions
TUBB	TUBB	Definite	TUBB	MAYTANSINE		DTC	563462
TUBB	TUBB	Definite	TUBB	CHEMBL2036119		DTC	22543234
TUBB	TUBB	Definite	TUBB	ZAMPANOLIDE		DTC	19877653
TUBB	TUBB	Definite	TUBB	VINBLASTINE SULFATE	inhibitor	ChemblInteractions
TUBB	TUBB	Definite	TUBB	DAVUNETIDE		ChemblInteractions
TUBB	TUBB	Definite	TUBB	CHEMBL2036124		DTC	22543234
TUBB	TUBB	Definite	TUBB	COMBRETASTATIN A4		DTC	23631389|16913727|22543234|25584687|24669888|17765552|25192811
TUBB	TUBB	Definite	TUBB	CROLIBULIN	inhibitor	ChemblInteractions
TUBB	TUBB	Definite	TUBB	LARGAZOLE		DTC	20491440
TUBB	TUBB	Definite	TUBB	PODOFILOX	inhibitor	DTC	17765552|2011590|24953821|21402478
TUBB	TUBB	Definite	TUBB	VINORELBINE TARTRATE	inhibitor	ChemblInteractions
TUBB	TUBB	Definite	TUBB	PLINABULIN	inhibitor	ChemblInteractions|TTD
TUBB	TUBB	Definite	TUBB	TRASTUZUMAB EMTANSINE	inhibitor	ChemblInteractions
TUBB	TUBB	Definite	TUBB	CHEMBL453818		DTC	12141877
TUBB	TUBB	Definite	TUBB	MAYTANSINOL		DTC	563462
TUBB	TUBB	Definite	TUBB	DOCETAXEL	inhibitor	ChemblInteractions
TUBB	TUBB	Definite	TUBB	SIMOTAXEL		TTD
TUBB	TUBB	Definite	TUBB	MEBENDAZOLE		TTD
TUBB	TUBB	Definite	TUBB	DOLASTATIN-10		TTD
TUBB	TUBB	Definite	TUBB	PHOMOPSIN A		DTC	19072542
TUBB	TUBB	Definite	TUBB	BATABULIN		TTD
TUBB	TUBB	Definite	TUBB	VINDESINE		TTD
TUBB	TUBB	Definite	TUBB	ERIBULIN	inhibitor	GuideToPharmacology
TUBB	TUBB	Definite	TUBB	CHEMBL1795737		DTC	21664138
TUBB	TUBB	Definite	TUBB	VINCRISTINE SULFATE	inhibitor	ChemblInteractions
TUBB	TUBB	Definite	TUBB	CHEMBL1935538		DTC	22435708
TUBB	TUBB	Definite	TUBB	ERIBULIN MESYLATE	inhibitor	ChemblInteractions
TUBB	TUBB	Definite	TUBB	CYCLOSTREPTIN		DTC	17206139
TUBB	TUBB	Definite	TUBB	ZD-6126		TTD
TUBB	TUBB	Definite	TUBB	CURCUMIN		DTC	23830698
TUBB	TUBB	Definite	TUBB	DOCETAXEL	inhibitor	GuideToPharmacology
TUBB	TUBB	Definite	TUBB	SAGOPILONE		ChemblInteractions
TUBB	TUBB	Definite	TUBB	ABT-751		DTC|TTD	25468039
TUBB	TUBB	Definite	TUBB	ALBENDAZOLE		TTD
AGER	AGER	Definite	AGER	PYRIDOXAMINE		TTD
AGER	AGER	Definite	AGER	AZELIRAGON	antagonist	GuideToPharmacology
CHRNA2	CHRNA2	Definite	CHRNA2	GANTACURIUM		TdgClinicalTrial
CHRNA2	CHRNA2	Definite	CHRNA2	CP-601927	agonist	GuideToPharmacology
CHRNA2	CHRNA2	Definite	CHRNA2	CARBACHOL	agonist	TdgClinicalTrial|TEND|TTD	20498043|11752352|17139284|17016423
CHRNA2	CHRNA2	Definite	CHRNA2	ROCURONIUM	antagonist	TdgClinicalTrial|TEND|TTD	19417616|11752352|17139284|16931985|17016423|18633030
CHRNA2	CHRNA2	Definite	CHRNA2	HEXAMETHONIUM	antagonist|blocker	GuideToPharmacology	12183644|8232788
CHRNA2	CHRNA2	Definite	CHRNA2	PIPECURONIUM	antagonist	TdgClinicalTrial|TEND|TTD	12426786|1748153|11752352|9227834|17016423
CHRNA2	CHRNA2	Definite	CHRNA2	DOXACURIUM	antagonist	TdgClinicalTrial|TEND	11752352|17139284|17016423|18633030
CHRNA2	CHRNA2	Definite	CHRNA2	TUBOCURARINE	antagonist	TdgClinicalTrial|TEND|TTD	11562442|20338223|19417616|11752352|17139284|17016423|18633030
CHRNA2	CHRNA2	Definite	CHRNA2	DECAMETHONIUM	partial agonist	TdgClinicalTrial|TEND	12067008|7848904|11752352|17139284|17016423
CHRNA2	CHRNA2	Definite	CHRNA2	CISATRACURIUM	antagonist	TTD	12171561|17139284|17016423
CHRNA2	CHRNA2	Definite	CHRNA2	MIVACURIUM	antagonist	TdgClinicalTrial|TEND|TTD	19417616|11752352|17139284|16931985|17016423|19352159
CHRNA2	CHRNA2	Definite	CHRNA2	BIPERIDEN	antagonist	TdgClinicalTrial|TEND	17139284|17016423
CHRNA2	CHRNA2	Definite	CHRNA2	MECAMYLAMINE	antagonist|blocker|inhibitor	TdgClinicalTrial|TEND|GuideToPharmacology	11752352|17139284|17016423|19778551|12080428
CHRNA2	CHRNA2	Definite	CHRNA2	PANCURONIUM	antagonist	TdgClinicalTrial|TEND	19417616|17016423|17525594
CHRNA2	CHRNA2	Definite	CHRNA2	NICOTINE	agonist	TdgClinicalTrial|TEND	19560048|11006350|20400469|20081230|15048644
CHRNA2	CHRNA2	Definite	CHRNA2	ATRACURIUM		TdgClinicalTrial|TEND
CHRNA2	CHRNA2	Definite	CHRNA2	VECURONIUM	antagonist	TTD	12145052|19417616|18633030
CHRNA2	CHRNA2	Definite	CHRNA2	METOCURINE	antagonist	TdgClinicalTrial|TEND	18842832|8132625|11752352|12799358|18633030
CHRNA2	CHRNA2	Definite	CHRNA2	LEVALLORPHAN		TTD
CHRNA2	CHRNA2	Definite	CHRNA2	CYTISINICLINE		TTD
DPYD	DPYD	Definite	DPYD	CAPECITABINE		NCI|CGI|CIViC|FDA	16279094|23988873
DPYD	DPYD	Definite	DPYD	TEGAFUR		NCI|CGI|CIViC|PharmGKB	12209976|28950804|24923815|30858516|23603345|16115930|27122156|31382864|22490566|9470816|18600527|15944764|26603945|18443386|17700593|17165084|17000685|19530960|26794347|19795123|12360106|19473056|9439663|26099996|26216193|27864592|17121937|18299612|28295243|15132136|20819423|27995989|16151913|15017333|24817302|30114658|29846282|9323575|29134491|23988873|17203168|11895907|32378051|25677447|170648…
DPYD	DPYD	Definite	DPYD	FLUOROURACIL		NCI|CIViC|TTD|FDA	16421754|15330204|17179731|23988873|15538739|11501504|31871216
DPYD	DPYD	Definite	DPYD	IRINOTECAN		PharmGKB	28395759
DPYD	DPYD	Definite	DPYD	LEUCOVORIN		NCI|CIViC|PharmGKB	11977552|12576451|31871216
DPYD	DPYD	Definite	DPYD	FLUCYTOSINE		PharmGKB
DPYD	DPYD	Definite	DPYD	ENILURACIL		TdgClinicalTrial|TTD	16466986
DPYD	DPYD	Definite	DPYD	GIMERACIL	inhibitor	TdgClinicalTrial
DPYD	DPYD	Definite	DPYD	OXALIPLATIN		NCI	17127229
EHMT2	EHMT2	Definite	EHMT2	MEDRONIC ACID		DTC
EHMT2	EHMT2	Definite	EHMT2	TELMISARTAN		DTC
EHMT2	EHMT2	Definite	EHMT2	LISINOPRIL HYDRATE		DTC
EHMT2	EHMT2	Definite	EHMT2	CHEMBL591628		DTC
EHMT2	EHMT2	Definite	EHMT2	DYCLONINE		DTC
EHMT2	EHMT2	Definite	EHMT2	CHEMBL1328677		DTC
EHMT2	EHMT2	Definite	EHMT2	CHEMBL606456		DTC
EHMT2	EHMT2	Definite	EHMT2	HISTAMINE		DTC
EHMT2	EHMT2	Definite	EHMT2	WIN-552122		DTC
EHMT2	EHMT2	Definite	EHMT2	CLIOQUINOL		DTC
EHMT2	EHMT2	Definite	EHMT2	CHEMBL590168		DTC
EHMT2	EHMT2	Definite	EHMT2	CHEMBL602206		DTC
EHMT2	EHMT2	Definite	EHMT2	CHEMBL541585		DTC
EHMT2	EHMT2	Definite	EHMT2	CHEMBL56542		DTC
EHMT2	EHMT2	Definite	EHMT2	CHEMBL515495		DTC
EHMT2	EHMT2	Definite	EHMT2	DANTHRON		DTC
EHMT2	EHMT2	Definite	EHMT2	CHEMBL533602		DTC
EHMT2	EHMT2	Definite	EHMT2	NALIDIXIC ACID		DTC
EHMT2	EHMT2	Definite	EHMT2	BUTHIONINE SULFOXIMINE		DTC
EHMT2	EHMT2	Definite	EHMT2	IMIPRAMINE		DTC
EHMT2	EHMT2	Definite	EHMT2	ARACHIDONIC ACID		DTC
EHMT2	EHMT2	Definite	EHMT2	CHEMBL547304		DTC
EHMT2	EHMT2	Definite	EHMT2	CHEMBL583150		DTC
EHMT2	EHMT2	Definite	EHMT2	CHEMBL528119		DTC
EHMT2	EHMT2	Definite	EHMT2	DISULFIRAM		DTC
EHMT2	EHMT2	Definite	EHMT2	CHEMBL403741		DTC
EHMT2	EHMT2	Definite	EHMT2	DIPYRITHIONE		DTC
EHMT2	EHMT2	Definite	EHMT2	BENANSERIN HYDROCHLORIDE		DTC
EHMT2	EHMT2	Definite	EHMT2	8-OH-DPAT		DTC
EHMT2	EHMT2	Definite	EHMT2	2-MERCAPTOBENZIMIDAZOLE		DTC
EHMT2	EHMT2	Definite	EHMT2	CYSTEAMINE HYDROCHLORIDE		DTC
EHMT2	EHMT2	Definite	EHMT2	CHEMBL576781		DTC	19891491
EHMT2	EHMT2	Definite	EHMT2	CHEMBL344127		DTC
EHMT2	EHMT2	Definite	EHMT2	MITOXANTRONE		DTC
EHMT2	EHMT2	Definite	EHMT2	THIOGUANOSINE		DTC
EHMT2	EHMT2	Definite	EHMT2	KENPAULLONE		DTC
EHMT2	EHMT2	Definite	EHMT2	CHEMBL295212		DTC
EHMT2	EHMT2	Definite	EHMT2	CHEMBL1486366		DTC
EHMT2	EHMT2	Definite	EHMT2	CHEMBL581872		DTC
EHMT2	EHMT2	Definite	EHMT2	FLUSPIRILENE		DTC
EHMT2	EHMT2	Definite	EHMT2	SALMETEROL XINAFOATE		DTC
EHMT2	EHMT2	Definite	EHMT2	CHEMBL1509789		DTC
EHMT2	EHMT2	Definite	EHMT2	CANAVANINE		DTC
EHMT2	EHMT2	Definite	EHMT2	CHEMBL585030		DTC
EHMT2	EHMT2	Definite	EHMT2	CHEMBL166486		DTC
EHMT2	EHMT2	Definite	EHMT2	CHEMBL538798		DTC
EHMT2	EHMT2	Definite	EHMT2	FUSARIC ACID		DTC
EHMT2	EHMT2	Definite	EHMT2	ENOXAMAST		DTC
EHMT2	EHMT2	Definite	EHMT2	PHENAZINE-1-CARBOXYLIC ACID		DTC
EHMT2	EHMT2	Definite	EHMT2	CHEMBL589694		DTC
EHMT2	EHMT2	Definite	EHMT2	METHOCTRAMINE		DTC
EHMT2	EHMT2	Definite	EHMT2	PHENAZINE		DTC
EHMT2	EHMT2	Definite	EHMT2	L-MIMOSINE		DTC
EHMT2	EHMT2	Definite	EHMT2	CHEMBL530664		DTC
EHMT2	EHMT2	Definite	EHMT2	CHEMBL527586		DTC
EHMT2	EHMT2	Definite	EHMT2	THIOSALICYLIC ACID		DTC
EHMT2	EHMT2	Definite	EHMT2	DIETHYLCARBAMAZINE CITRATE		DTC
EHMT2	EHMT2	Definite	EHMT2	GOSSYPOL		DTC
EHMT2	EHMT2	Definite	EHMT2	SEROTONIN		DTC
EHMT2	EHMT2	Definite	EHMT2	R-N-PROPYLNORAPOMORPHINE		DTC
EHMT2	EHMT2	Definite	EHMT2	CHEMBL1383812		DTC
EHMT2	EHMT2	Definite	EHMT2	CHEMBL547656		DTC
EHMT2	EHMT2	Definite	EHMT2	CHEMBL466465		DTC
EHMT2	EHMT2	Definite	EHMT2	PHENINDIONE		DTC
EHMT2	EHMT2	Definite	EHMT2	(-)-U-50488		DTC
EHMT2	EHMT2	Definite	EHMT2	AMILORIDE		DTC
EHMT2	EHMT2	Definite	EHMT2	CHEMBL598663		DTC
EHMT2	EHMT2	Definite	EHMT2	ETAZOLATE		DTC
EHMT2	EHMT2	Definite	EHMT2	CHEMBL578294		DTC
EHMT2	EHMT2	Definite	EHMT2	CHEMBL576353		DTC
EHMT2	EHMT2	Definite	EHMT2	CGP-53353		DTC
EHMT2	EHMT2	Definite	EHMT2	CHLORPROMAZINE HYDROCHLORIDE		DTC
EHMT2	EHMT2	Definite	EHMT2	N-METHYL-D-ASPARTIC ACID (NMDA)		DTC
EHMT2	EHMT2	Definite	EHMT2	EPINEPHRINE BITARTRATE		DTC
EHMT2	EHMT2	Definite	EHMT2	CHEMBL599098		DTC
EHMT2	EHMT2	Definite	EHMT2	CHEMBL1478462		DTC
EHMT2	EHMT2	Definite	EHMT2	PHENELZINE		DTC
EHMT2	EHMT2	Definite	EHMT2	CHLOROETHYLCLONIDINE		DTC
EHMT2	EHMT2	Definite	EHMT2	NORBINALTORPHIMINE		DTC
EHMT2	EHMT2	Definite	EHMT2	INDOCATE		DTC
EHMT2	EHMT2	Definite	EHMT2	FOMEPIZOLE		DTC
EHMT2	EHMT2	Definite	EHMT2	KETOCONAZOLE		DTC
EHMT2	EHMT2	Definite	EHMT2	NALOXONE BENZOYLHYDRAZONE		DTC
EHMT2	EHMT2	Definite	EHMT2	CHEMBL2095095		DTC
EHMT2	EHMT2	Definite	EHMT2	CYTARABINE		DTC
EHMT2	EHMT2	Definite	EHMT2	CHEMBL1232076		DTC
EHMT2	EHMT2	Definite	EHMT2	SB-202190		DTC
EHMT2	EHMT2	Definite	EHMT2	CHEMBL525106		DTC
EHMT2	EHMT2	Definite	EHMT2	SALUBRINAL		DTC
EHMT2	EHMT2	Definite	EHMT2	CHEMBL589245		DTC
EHMT2	EHMT2	Definite	EHMT2	BRONOPOL		DTC
EHMT2	EHMT2	Definite	EHMT2	CHEMBL585502		DTC
EHMT2	EHMT2	Definite	EHMT2	SCARLET RED		DTC
EHMT2	EHMT2	Definite	EHMT2	CHEMBL582697		DTC
EHMT2	EHMT2	Definite	EHMT2	INDIGO		DTC
EHMT2	EHMT2	Definite	EHMT2	BISMUTH SUBSALICYLATE		DTC
EHMT2	EHMT2	Definite	EHMT2	DYCLONINE HYDROCHLORIDE		DTC
EHMT2	EHMT2	Definite	EHMT2	CHEMBL582764		DTC
EHMT2	EHMT2	Definite	EHMT2	CHEMBL1256845		DTC
EHMT2	EHMT2	Definite	EHMT2	0-HEXYL-1,3-DIAMINE-PLATINUM 2,2-DICHLORIDE		DTC
EHMT2	EHMT2	Definite	EHMT2	CAPENSIN		DTC
EHMT2	EHMT2	Definite	EHMT2	THIOINOSINE		DTC
EHMT2	EHMT2	Definite	EHMT2	CHEMBL1368696		DTC
EHMT2	EHMT2	Definite	EHMT2	CISPLATIN		DTC
EHMT2	EHMT2	Definite	EHMT2	PAPAVERINE		DTC
EHMT2	EHMT2	Definite	EHMT2	CHEMBL1236602		DTC
EHMT2	EHMT2	Definite	EHMT2	CAMPTOTHECIN		DTC
EHMT2	EHMT2	Definite	EHMT2	CHEMBL297304		DTC
EHMT2	EHMT2	Definite	EHMT2	CHEMBL1814509		DTC
EHMT2	EHMT2	Definite	EHMT2	CHEMBL582694		DTC
EHMT2	EHMT2	Definite	EHMT2	IODOFORM		DTC
EHMT2	EHMT2	Definite	EHMT2	RHEIN		DTC
EHMT2	EHMT2	Definite	EHMT2	PYROGALLOL		DTC
EHMT2	EHMT2	Definite	EHMT2	FENOLDOPAM BROMIDE		DTC
EHMT2	EHMT2	Definite	EHMT2	GUAIAZULEN		DTC
EHMT2	EHMT2	Definite	EHMT2	CHEMBL234338		DTC
EHMT2	EHMT2	Definite	EHMT2	CHEMBL1483413		DTC
EHMT2	EHMT2	Definite	EHMT2	CHEMBL591137		DTC
EHMT2	EHMT2	Definite	EHMT2	BRIMONIDINE		DTC
EHMT2	EHMT2	Definite	EHMT2	OXYTETRACYCLINE		DTC
EHMT2	EHMT2	Definite	EHMT2	CONGO RED		DTC
EHMT2	EHMT2	Definite	EHMT2	PHENELZINE SULFATE		DTC
EHMT2	EHMT2	Definite	EHMT2	CHEMBL1442783		DTC
EHMT2	EHMT2	Definite	EHMT2	PHYSOSTIGMINE		DTC
EHMT2	EHMT2	Definite	EHMT2	CHEMBL258767		DTC
EHMT2	EHMT2	Definite	EHMT2	NORDEXFENFLURAMINE		DTC
EHMT2	EHMT2	Definite	EHMT2	DIACEREIN		DTC
EHMT2	EHMT2	Definite	EHMT2	CYSTAMINE		DTC
EHMT2	EHMT2	Definite	EHMT2	METITEPINE		DTC
EHMT2	EHMT2	Definite	EHMT2	CHEMBL587856		DTC
EHMT2	EHMT2	Definite	EHMT2	DAMNACANTHAL		DTC
EHMT2	EHMT2	Definite	EHMT2	SALSOLINOL HYDROBROMIDE		DTC
EHMT2	EHMT2	Definite	EHMT2	CHEMBL547175		DTC
EHMT2	EHMT2	Definite	EHMT2	PORFIROMYCIN		DTC
EHMT2	EHMT2	Definite	EHMT2	METHYLMALONIC ACID		DTC
EHMT2	EHMT2	Definite	EHMT2	CHEMBL56731		DTC
EHMT2	EHMT2	Definite	EHMT2	HOMIDIUM		DTC
EHMT2	EHMT2	Definite	EHMT2	CHEMBL577222		DTC
EHMT2	EHMT2	Definite	EHMT2	SPERMINE		DTC
EHMT2	EHMT2	Definite	EHMT2	ANTHRALIN		DTC
EHMT2	EHMT2	Definite	EHMT2	TREQUINSIN		DTC
EHMT2	EHMT2	Definite	EHMT2	GW7647		DTC
EHMT2	EHMT2	Definite	EHMT2	CYCLOVALONE		DTC
EHMT2	EHMT2	Definite	EHMT2	CHEMBL601385		DTC
EHMT2	EHMT2	Definite	EHMT2	ZAPA		DTC
EHMT2	EHMT2	Definite	EHMT2	BUFLOMEDIL		DTC
EHMT2	EHMT2	Definite	EHMT2	ACETYLSEROTONIN		DTC
EHMT2	EHMT2	Definite	EHMT2	CHEMBL585240		DTC
EHMT2	EHMT2	Definite	EHMT2	CHEMBL538542		DTC
EHMT2	EHMT2	Definite	EHMT2	LOMOFUNGIN		DTC
EHMT2	EHMT2	Definite	EHMT2	FENRETINIDE		DTC
EHMT2	EHMT2	Definite	EHMT2	INDIGOTINDISULFONATE		DTC
EHMT2	EHMT2	Definite	EHMT2	CARMINE		DTC
EHMT2	EHMT2	Definite	EHMT2	CHEMBL527585		DTC
EHMT2	EHMT2	Definite	EHMT2	CHEMBL586195		DTC
EHMT2	EHMT2	Definite	EHMT2	BENFLUOREX HYDROCHLORIDE		DTC
EHMT2	EHMT2	Definite	EHMT2	NIALAMIDE		DTC
EHMT2	EHMT2	Definite	EHMT2	DOPAMINE HYDROCHLORIDE		DTC
EHMT2	EHMT2	Definite	EHMT2	(R,S)-AMPA		DTC
EHMT2	EHMT2	Definite	EHMT2	GR-127935		DTC
EHMT2	EHMT2	Definite	EHMT2	GR-55562		DTC
EHMT2	EHMT2	Definite	EHMT2	QUINOLINIC ACID		DTC
EHMT2	EHMT2	Definite	EHMT2	PYRROLIDINE DITHIOCARBAMIC ACID, AMMONIUM SALT		DTC
EHMT2	EHMT2	Definite	EHMT2	CHEMBL27403		DTC
EHMT2	EHMT2	Definite	EHMT2	THIOGUANINE		DTC
EHMT2	EHMT2	Definite	EHMT2	CHEMBL1341830		DTC
EHMT2	EHMT2	Definite	EHMT2	GALLIC ACID METHYL ESTER		DTC
EHMT2	EHMT2	Definite	EHMT2	CHEMBL56393		DTC
EHMT2	EHMT2	Definite	EHMT2	CHEMBL1331995		DTC
EHMT2	EHMT2	Definite	EHMT2	PD-169316		DTC
EHMT2	EHMT2	Definite	EHMT2	MENADIONE		DTC
EHMT2	EHMT2	Definite	EHMT2	CHEMBL428789		DTC
EHMT2	EHMT2	Definite	EHMT2	OLPRINONE		DTC
EHMT2	EHMT2	Definite	EHMT2	METHYLDOPA (RACEMIC)		DTC
EHMT2	EHMT2	Definite	EHMT2	METHYLDOPA		DTC
EHMT2	EHMT2	Definite	EHMT2	CHEMBL1256186		DTC
EHMT2	EHMT2	Definite	EHMT2	NIFEDIPINE		DTC
EHMT2	EHMT2	Definite	EHMT2	DIMETHYLPHENYLPIPERAZINIUM		DTC
EHMT2	EHMT2	Definite	EHMT2	CHEMBL17329		DTC
EHMT2	EHMT2	Definite	EHMT2	NOLATREXED		DTC
EHMT2	EHMT2	Definite	EHMT2	CHEMBL569864	inhibitor	GuideToPharmacology
EHMT2	EHMT2	Definite	EHMT2	BENSERAZIDE		DTC
EHMT2	EHMT2	Definite	EHMT2	ERGOCRYPTINE		DTC
EHMT2	EHMT2	Definite	EHMT2	CHEMBL1449731		DTC
EHMT2	EHMT2	Definite	EHMT2	CHEMBL520992		DTC
EHMT2	EHMT2	Definite	EHMT2	CHEMBL186526		DTC
EHMT2	EHMT2	Definite	EHMT2	BENSERAZIDE HYDROCHLORIDE		DTC
EHMT2	EHMT2	Definite	EHMT2	ALFUZOSIN		DTC
EHMT2	EHMT2	Definite	EHMT2	CROCIN		DTC
EHMT2	EHMT2	Definite	EHMT2	CHEMBL431504		DTC
EHMT2	EHMT2	Definite	EHMT2	E324		DTC
EHMT2	EHMT2	Definite	EHMT2	CHEMBL592558		DTC
EHMT2	EHMT2	Definite	EHMT2	CHEMBL140020		DTC
EHMT2	EHMT2	Definite	EHMT2	CHEMBL461579		DTC
EHMT2	EHMT2	Definite	EHMT2	DOXYCYCLINE		DTC
EHMT2	EHMT2	Definite	EHMT2	PHENOTHIAZINE		DTC
EHMT2	EHMT2	Definite	EHMT2	AMANTADINE HYDROCHLORIDE		DTC
EHMT2	EHMT2	Definite	EHMT2	FOSFONET		DTC
EHMT2	EHMT2	Definite	EHMT2	CHEMBL595227		DTC
EHMT2	EHMT2	Definite	EHMT2	S-NITROSOGLUTATHIONE		DTC
EHMT2	EHMT2	Definite	EHMT2	BUFEXAMAC		DTC
EHMT2	EHMT2	Definite	EHMT2	CHEMBL589711		DTC
EHMT2	EHMT2	Definite	EHMT2	PROCHLORPERAZINE EDISYLATE		DTC
EHMT2	EHMT2	Definite	EHMT2	CHEMBL547483		DTC
EHMT2	EHMT2	Definite	EHMT2	CHEMBL475813		DTC
EHMT2	EHMT2	Definite	EHMT2	AGROCLAVINE		DTC
EHMT2	EHMT2	Definite	EHMT2	CHEMBL582287		DTC
EHMT2	EHMT2	Definite	EHMT2	CHEMBL2094456		DTC
EHMT2	EHMT2	Definite	EHMT2	CHEMBL472940		DTC
EHMT2	EHMT2	Definite	EHMT2	CHEMBL24983		DTC
EHMT2	EHMT2	Definite	EHMT2	AP-7		DTC
EHMT2	EHMT2	Definite	EHMT2	CHEMBL429095		DTC
EHMT2	EHMT2	Definite	EHMT2	PURPUROGALLIN		DTC
EHMT2	EHMT2	Definite	EHMT2	CHELERYTHRINE		DTC
EHMT2	EHMT2	Definite	EHMT2	LAPACHONE		DTC
EHMT2	EHMT2	Definite	EHMT2	NARINGIN		DTC
EHMT2	EHMT2	Definite	EHMT2	TAMOXIFEN		DTC
EHMT2	EHMT2	Definite	EHMT2	CHEMBL559934		DTC
EHMT2	EHMT2	Definite	EHMT2	LINOLENIC ACID		DTC
EHMT2	EHMT2	Definite	EHMT2	SULINDAC		DTC
EHMT2	EHMT2	Definite	EHMT2	NALOXONE HYDROCHLORIDE		DTC
EHMT2	EHMT2	Definite	EHMT2	APOCIDEINE		DTC
EHMT2	EHMT2	Definite	EHMT2	ERGOCRISTINE		DTC
EHMT2	EHMT2	Definite	EHMT2	CYCLOPHOSPHAMIDE		DTC
EHMT2	EHMT2	Definite	EHMT2	PHENSERINE		DTC
EHMT2	EHMT2	Definite	EHMT2	MIANSERIN HYDROCHLORIDE		DTC
EHMT2	EHMT2	Definite	EHMT2	ACTINONIN		DTC
EHMT2	EHMT2	Definite	EHMT2	CHEMBL86464		DTC
EHMT2	EHMT2	Definite	EHMT2	RALOXIFENE HYDROCHLORIDE		DTC
EHMT2	EHMT2	Definite	EHMT2	CHEMBL596631		DTC
EHMT2	EHMT2	Definite	EHMT2	AZEPEXOLE		DTC
EHMT2	EHMT2	Definite	EHMT2	CHEMBL600701		DTC
EHMT2	EHMT2	Definite	EHMT2	CHEMBL339587		DTC
EHMT2	EHMT2	Definite	EHMT2	CHEMBL284609		DTC
EHMT2	EHMT2	Definite	EHMT2	ISOPROTERENOL		DTC
EHMT2	EHMT2	Definite	EHMT2	CHEMBL578512		DTC
EHMT2	EHMT2	Definite	EHMT2	METHYLSELENOCYSTEINE		DTC
EHMT2	EHMT2	Definite	EHMT2	TYRPHOSTIN AG 879		DTC
EHMT2	EHMT2	Definite	EHMT2	DOXORUBICIN HYDROCHLORIDE		DTC
EHMT2	EHMT2	Definite	EHMT2	CHEMBL121915		DTC
EHMT2	EHMT2	Definite	EHMT2	NOMIFENSINE		DTC
EHMT2	EHMT2	Definite	EHMT2	THIOPROPERAZINE MESYLATE		DTC
EHMT2	EHMT2	Definite	EHMT2	ARACHIDONOYL GLYCINE		DTC
EHMT2	EHMT2	Definite	EHMT2	GF-109203		DTC
EHMT2	EHMT2	Definite	EHMT2	FENCLONINE		DTC
EHMT2	EHMT2	Definite	EHMT2	CHLOROXINE		DTC
EHMT2	EHMT2	Definite	EHMT2	DOXYLAMINE		DTC
EHMT2	EHMT2	Definite	EHMT2	PHOSMET		DTC
EHMT2	EHMT2	Definite	EHMT2	SOBUZOXANE		DTC
EHMT2	EHMT2	Definite	EHMT2	EPHEDRINE SULFATE		DTC
EHMT2	EHMT2	Definite	EHMT2	CHEMBL547269		DTC
EHMT2	EHMT2	Definite	EHMT2	MERCURIC CHLORIDE		DTC
EHMT2	EHMT2	Definite	EHMT2	FLUPHENAZINE HYDROCHLORIDE		DTC
EHMT2	EHMT2	Definite	EHMT2	LANSOPRAZOLE		DTC
EHMT2	EHMT2	Definite	EHMT2	CEPHALEXIN		DTC
EHMT2	EHMT2	Definite	EHMT2	CHEMBL532160		DTC
EHMT2	EHMT2	Definite	EHMT2	CALMIDAZOLIUM CHLORIDE		DTC
EHMT2	EHMT2	Definite	EHMT2	CHEMBL1256863		DTC
EHMT2	EHMT2	Definite	EHMT2	DIMETHYLPHENYLPIPERAZINIUM IODIDE		DTC
EHMT2	EHMT2	Definite	EHMT2	CHEMBL1256920		DTC
EHMT2	EHMT2	Definite	EHMT2	APOMORPHINE HYDROCHLORIDE HEMIHYDRATE		DTC
EHMT2	EHMT2	Definite	EHMT2	CHEMBL602763		DTC
EHMT2	EHMT2	Definite	EHMT2	METHYLERGONOVINE		DTC
EHMT2	EHMT2	Definite	EHMT2	SURAMIN		DTC
EHMT2	EHMT2	Definite	EHMT2	CARBOXYMETHOXYLAMINE		DTC
EHMT2	EHMT2	Definite	EHMT2	CHEMBL1503729		DTC
EHMT2	EHMT2	Definite	EHMT2	BENZYL NICOTINATE		DTC
EHMT2	EHMT2	Definite	EHMT2	CHEMBL395915		DTC
EHMT2	EHMT2	Definite	EHMT2	YOHIMBINE		DTC
EHMT2	EHMT2	Definite	EHMT2	CHEMBL179611		DTC
EHMT2	EHMT2	Definite	EHMT2	UMIFENOVIR		DTC
EHMT2	EHMT2	Definite	EHMT2	CHEMBL84010		DTC
EHMT2	EHMT2	Definite	EHMT2	GLUTAMIC ACID		DTC
EHMT2	EHMT2	Definite	EHMT2	CHEMBL603739		DTC
EHMT2	EHMT2	Definite	EHMT2	DIAMIDE		DTC
EHMT2	EHMT2	Definite	EHMT2	FENAMIC ACID		DTC
EHMT2	EHMT2	Definite	EHMT2	HARMINE HYDROCHLORIDE		DTC
EHMT2	EHMT2	Definite	EHMT2	TRYPTOPHAN		DTC
EHMT2	EHMT2	Definite	EHMT2	MG-132		DTC
EHMT2	EHMT2	Definite	EHMT2	ARUNDINE		DTC
EHMT2	EHMT2	Definite	EHMT2	CHEMBL1534034		DTC
EHMT2	EHMT2	Definite	EHMT2	BUSPIRONE		DTC
EHMT2	EHMT2	Definite	EHMT2	CHEMBL586982		DTC
EHMT2	EHMT2	Definite	EHMT2	CHEMBL1545737		DTC
EHMT2	EHMT2	Definite	EHMT2	CHEMBL1256797		DTC
EHMT2	EHMT2	Definite	EHMT2	CHEMBL581152		DTC
EHMT2	EHMT2	Definite	EHMT2	CHEMBL224032		DTC
EHMT2	EHMT2	Definite	EHMT2	CHEMBL532143		DTC
EHMT2	EHMT2	Definite	EHMT2	SR-2640		DTC
EHMT2	EHMT2	Definite	EHMT2	CHEMBL590186		DTC
EHMT2	EHMT2	Definite	EHMT2	RISEDRONIC ACID		DTC
EHMT2	EHMT2	Definite	EHMT2	TRETINOIN		DTC
EHMT2	EHMT2	Definite	EHMT2	CHEMBL1308346		DTC
EHMT2	EHMT2	Definite	EHMT2	CHEMBL1335833		DTC
EHMT2	EHMT2	Definite	EHMT2	RABEPRAZOLE		DTC
EHMT2	EHMT2	Definite	EHMT2	CHEMBL589924		DTC
EHMT2	EHMT2	Definite	EHMT2	CHEMBL1255936		DTC
EHMT2	EHMT2	Definite	EHMT2	CHEMBL548615		DTC
EHMT2	EHMT2	Definite	EHMT2	CHEMBL602990		DTC
EHMT2	EHMT2	Definite	EHMT2	CHELIDAMIC ACID		DTC
EHMT2	EHMT2	Definite	EHMT2	EFLORNITHINE		DTC
EHMT2	EHMT2	Definite	EHMT2	CHEMBL527584		DTC
EHMT2	EHMT2	Definite	EHMT2	CHEMBL600747		DTC
EHMT2	EHMT2	Definite	EHMT2	CHEMBL523200		DTC
EHMT2	EHMT2	Definite	EHMT2	CHEMBL592588		DTC
EHMT2	EHMT2	Definite	EHMT2	CHEMBL600692		DTC
EHMT2	EHMT2	Definite	EHMT2	QUINACRINE		DTC
EHMT2	EHMT2	Definite	EHMT2	CHEMBL261557		DTC
EHMT2	EHMT2	Definite	EHMT2	THIOTHIXENE HYDROCHLORIDE		DTC
EHMT2	EHMT2	Definite	EHMT2	CHEMBL582722		DTC
EHMT2	EHMT2	Definite	EHMT2	CHEMBL596380		DTC
EHMT2	EHMT2	Definite	EHMT2	TALIPEXOLE		DTC
EHMT2	EHMT2	Definite	EHMT2	HYPERICIN		DTC
EHMT2	EHMT2	Definite	EHMT2	CHEMBL1256813		DTC
EHMT2	EHMT2	Definite	EHMT2	HERACLENOL		DTC
EHMT2	EHMT2	Definite	EHMT2	CYCLOPHOSPHAMIDE		DTC
EHMT2	EHMT2	Definite	EHMT2	DEBRISOQUIN SULFATE		DTC
EHMT2	EHMT2	Definite	EHMT2	IDARUBICIN		DTC
EHMT2	EHMT2	Definite	EHMT2	CHEMBL536166		DTC
EHMT2	EHMT2	Definite	EHMT2	INAMRINONE		DTC
EHMT2	EHMT2	Definite	EHMT2	DEXBROMPHENIRAMINE		DTC
EHMT2	EHMT2	Definite	EHMT2	CHLOROGENIC ACID		DTC
EHMT2	EHMT2	Definite	EHMT2	TANNIC ACID		DTC
EHMT2	EHMT2	Definite	EHMT2	LAVENDUSTIN A		DTC
EHMT2	EHMT2	Definite	EHMT2	CHEMBL1256995		DTC
EHMT2	EHMT2	Definite	EHMT2	CHEMBL338314		DTC
EHMT2	EHMT2	Definite	EHMT2	CHEMBL584458		DTC
EHMT2	EHMT2	Definite	EHMT2	THIOTEPA		DTC
EHMT2	EHMT2	Definite	EHMT2	U-0126		DTC
EHMT2	EHMT2	Definite	EHMT2	CHEMBL154580		DTC
EHMT2	EHMT2	Definite	EHMT2	NICARDIPINE HYDROCHLORIDE		DTC
EHMT2	EHMT2	Definite	EHMT2	BEPRIDIL		DTC
EHMT2	EHMT2	Definite	EHMT2	CHEMBL59030		DTC
EHMT2	EHMT2	Definite	EHMT2	CHEMBL68534		DTC
EHMT2	EHMT2	Definite	EHMT2	CHEMBL527336		DTC
EHMT2	EHMT2	Definite	EHMT2	MOLINDONE		DTC
EHMT2	EHMT2	Definite	EHMT2	( )-TAXIFOLIN		DTC
EHMT2	EHMT2	Definite	EHMT2	CYSTEINE		DTC
EHMT2	EHMT2	Definite	EHMT2	CHEMBL316796		DTC
EHMT2	EHMT2	Definite	EHMT2	PROCHLORPERAZINE		DTC
EHMT2	EHMT2	Definite	EHMT2	PAROXETINE		DTC
EHMT2	EHMT2	Definite	EHMT2	CHEMBL609606		DTC
EHMT2	EHMT2	Definite	EHMT2	HYPEROSIDE		DTC
EHMT2	EHMT2	Definite	EHMT2	CHEMBL532412		DTC
EHMT2	EHMT2	Definite	EHMT2	TALIPEXOLE HYDROCHLORIDE		DTC
EHMT2	EHMT2	Definite	EHMT2	NALOXONE METHIODIDE		DTC
EHMT2	EHMT2	Definite	EHMT2	CHEMBL1448793		DTC
EHMT2	EHMT2	Definite	EHMT2	CHEMBL582737		DTC
EHMT2	EHMT2	Definite	EHMT2	CATECHOL		DTC
EHMT2	EHMT2	Definite	EHMT2	SURAMIN HEXASODIUM		DTC
EHMT2	EHMT2	Definite	EHMT2	GLUTAMIC ACID HYDROCHLORIDE		DTC
EHMT2	EHMT2	Definite	EHMT2	CHEMBL1307453		DTC
EHMT2	EHMT2	Definite	EHMT2	PHENYLBUTAZONE		DTC
EHMT2	EHMT2	Definite	EHMT2	METHYSERGIDE		DTC
EHMT2	EHMT2	Definite	EHMT2	APAZONE		DTC
EHMT2	EHMT2	Definite	EHMT2	CHEMBL193093		DTC
EHMT2	EHMT2	Definite	EHMT2	CEFOTIAM HYDROCHLORIDE		DTC
EHMT2	EHMT2	Definite	EHMT2	CEPHARANTHINE		DTC
EHMT2	EHMT2	Definite	EHMT2	CHEMBL1256364		DTC
EHMT2	EHMT2	Definite	EHMT2	DAUNORUBICIN		DTC
EHMT2	EHMT2	Definite	EHMT2	4-BENZYLOXYANILINE		DTC
EHMT2	EHMT2	Definite	EHMT2	IDAZOXAN HYDROCHLORIDE		DTC
EHMT2	EHMT2	Definite	EHMT2	CHEMBL198666		DTC
EHMT2	EHMT2	Definite	EHMT2	INDOLE-3-CARBINOL		DTC
EHMT2	EHMT2	Definite	EHMT2	DICYCLOMINE		DTC
EHMT2	EHMT2	Definite	EHMT2	MORIN		DTC
EHMT2	EHMT2	Definite	EHMT2	CHEMBL577851		DTC
EHMT2	EHMT2	Definite	EHMT2	CHEMBL596836		DTC
EHMT2	EHMT2	Definite	EHMT2	CHEMBL545184		DTC
EHMT2	EHMT2	Definite	EHMT2	SULFINPYRAZONE		DTC
EHMT2	EHMT2	Definite	EHMT2	BISINDOLYLMALEIMIDE IX		DTC
EHMT2	EHMT2	Definite	EHMT2	CHEMBL584452		DTC
EHMT2	EHMT2	Definite	EHMT2	PALIPERIDONE		DTC
EHMT2	EHMT2	Definite	EHMT2	NORDIHYDROGUAIARETIC ACID		DTC
EHMT2	EHMT2	Definite	EHMT2	CARNOSIC ACID		DTC
EHMT2	EHMT2	Definite	EHMT2	OXYPHENBUTAZONE		DTC
EHMT2	EHMT2	Definite	EHMT2	CHEMBL599957		DTC
EHMT2	EHMT2	Definite	EHMT2	CARBETAPENTANE		DTC
EHMT2	EHMT2	Definite	EHMT2	BRILLIANT GREEN OXALATE		DTC
EHMT2	EHMT2	Definite	EHMT2	CHEMBL313737		DTC
EHMT2	EHMT2	Definite	EHMT2	ORPHENADRINE CITRATE		DTC
EHMT2	EHMT2	Definite	EHMT2	FLUPIRTINE MALEATE		DTC
EHMT2	EHMT2	Definite	EHMT2	MUSCARINE		DTC
EHMT2	EHMT2	Definite	EHMT2	CHEMBL1172228		DTC
EHMT2	EHMT2	Definite	EHMT2	ERGOCORNINE		DTC
EHMT2	EHMT2	Definite	EHMT2	MIZORIBINE		DTC
EHMT2	EHMT2	Definite	EHMT2	CHEMBL56543		DTC
EHMT2	EHMT2	Definite	EHMT2	CHEMBL1426508		DTC
EHMT2	EHMT2	Definite	EHMT2	PROMETHAZINE HYDROCHLORIDE		DTC
EHMT2	EHMT2	Definite	EHMT2	CHEMBL530280		DTC
EHMT2	EHMT2	Definite	EHMT2	CHEMBL211042		DTC
EHMT2	EHMT2	Definite	EHMT2	OXYMETHOLONE		DTC
EHMT2	EHMT2	Definite	EHMT2	PYRROLIDINE DITHIOCARBAMATE		DTC
EHMT2	EHMT2	Definite	EHMT2	CHEMBL317356		DTC
EHMT2	EHMT2	Definite	EHMT2	CHEMBL1255656		DTC
EHMT2	EHMT2	Definite	EHMT2	CHEMBL600769		DTC
EHMT2	EHMT2	Definite	EHMT2	THIORIDAZINE HYDROCHLORIDE		DTC
EHMT2	EHMT2	Definite	EHMT2	CHEMBL1310701		DTC
EHMT2	EHMT2	Definite	EHMT2	DAPHNETIN		DTC
EHMT2	EHMT2	Definite	EHMT2	CHEMBL1984884		DTC
EHMT2	EHMT2	Definite	EHMT2	CARBIDOPA		DTC
EHMT2	EHMT2	Definite	EHMT2	ENROFLOXACIN		DTC
EHMT2	EHMT2	Definite	EHMT2	CHEMBL67535		DTC
EHMT2	EHMT2	Definite	EHMT2	DITHIAZANINE IODIDE		DTC
EHMT2	EHMT2	Definite	EHMT2	CHEMBL565893		DTC
EHMT2	EHMT2	Definite	EHMT2	FLUTAMIDE		DTC
EHMT2	EHMT2	Definite	EHMT2	PROSTAGLANDIN A2		DTC
EHMT2	EHMT2	Definite	EHMT2	CHEMBL578504		DTC
EHMT2	EHMT2	Definite	EHMT2	PALMITOYL-CARNITINE		DTC
EHMT2	EHMT2	Definite	EHMT2	ELLAGIC ACID		DTC
EHMT2	EHMT2	Definite	EHMT2	CHEMBL171699		DTC
EHMT2	EHMT2	Definite	EHMT2	IODOPHTHALEIN		DTC
EHMT2	EHMT2	Definite	EHMT2	LOMEFLOXACIN		DTC
EHMT2	EHMT2	Definite	EHMT2	MELPHALAN		DTC
EHMT2	EHMT2	Definite	EHMT2	NIMESULIDE		DTC
EHMT2	EHMT2	Definite	EHMT2	IPRONIAZID PHOSPHATE		DTC
EHMT2	EHMT2	Definite	EHMT2	METERGOLINE		DTC
EHMT2	EHMT2	Definite	EHMT2	CHEMBL600734		DTC
EHMT2	EHMT2	Definite	EHMT2	CHEMBL116548		DTC
EHMT2	EHMT2	Definite	EHMT2	GABACULINE HYDROCHLORIDE		DTC
EHMT2	EHMT2	Definite	EHMT2	VINPOCETINE		DTC
EHMT2	EHMT2	Definite	EHMT2	CHEMBL1459149		DTC
EHMT2	EHMT2	Definite	EHMT2	BETAXOLOL HYDROCHLORIDE		DTC
EHMT2	EHMT2	Definite	EHMT2	AMSACRINE		DTC
EHMT2	EHMT2	Definite	EHMT2	XANTHINE AMINE CONGENER		DTC
EHMT2	EHMT2	Definite	EHMT2	DEXTROMEPROMAZINE		DTC
EHMT2	EHMT2	Definite	EHMT2	CHEMBL512649		DTC
EHMT2	EHMT2	Definite	EHMT2	CHEMBL1465049		DTC
EHMT2	EHMT2	Definite	EHMT2	SANGUINARIUM CHLORIDE		DTC
EHMT2	EHMT2	Definite	EHMT2	CHEMBL299853		DTC
EHMT2	EHMT2	Definite	EHMT2	TRANSTORINE		DTC
EHMT2	EHMT2	Definite	EHMT2	IMETIT		DTC
EHMT2	EHMT2	Definite	EHMT2	N-ETHYLMALEIMIDE		DTC
EHMT2	EHMT2	Definite	EHMT2	CHEMBL122355		DTC
EHMT2	EHMT2	Definite	EHMT2	APOMORPHINE		DTC
EHMT2	EHMT2	Definite	EHMT2	IBUFENAC		DTC
EHMT2	EHMT2	Definite	EHMT2	CEFOTAXIME SODIUM		DTC
EHMT2	EHMT2	Definite	EHMT2	OMEPRAZOLE MAGNESIUM		DTC
EHMT2	EHMT2	Definite	EHMT2	PROPYLENE GLYCOL MONOSTEARATE		DTC
EHMT2	EHMT2	Definite	EHMT2	CHEMBL1310138		DTC
EHMT2	EHMT2	Definite	EHMT2	CHEMBL457504		DTC
EHMT2	EHMT2	Definite	EHMT2	CHEMBL403183		DTC
EHMT2	EHMT2	Definite	EHMT2	Z-PRO-PROLINAL		DTC
EHMT2	EHMT2	Definite	EHMT2	CHEMBL603370		DTC
EHMT2	EHMT2	Definite	EHMT2	IODOACETAMIDE		DTC
EHMT2	EHMT2	Definite	EHMT2	CHEMBL601364		DTC
EHMT2	EHMT2	Definite	EHMT2	CHEMBL576409		DTC
EHMT2	EHMT2	Definite	EHMT2	TANSHINONE IIA		DTC
EHMT2	EHMT2	Definite	EHMT2	VANITIOLIDE		DTC
EHMT2	EHMT2	Definite	EHMT2	CEFAZOLIN		DTC
EHMT2	EHMT2	Definite	EHMT2	THYMOL IODIDE		DTC
EHMT2	EHMT2	Definite	EHMT2	MITOXANTRONE HYDROCHLORIDE		DTC
EHMT2	EHMT2	Definite	EHMT2	(S)-WILLARDIINE		DTC
EHMT2	EHMT2	Definite	EHMT2	(-)-EPICATECHIN		DTC
EHMT2	EHMT2	Definite	EHMT2	CHEMBL282199		DTC
EHMT2	EHMT2	Definite	EHMT2	QUINELORANE		DTC
EHMT2	EHMT2	Definite	EHMT2	CHEMBL582496		DTC
EHMT2	EHMT2	Definite	EHMT2	CHEMBL175266		DTC
EHMT2	EHMT2	Definite	EHMT2	QUERCETIN		DTC
EHMT2	EHMT2	Definite	EHMT2	CHEMBL600298		DTC
EHMT2	EHMT2	Definite	EHMT2	3,4-DIHYDROXYPHENYLACETIC ACID		DTC
EHMT2	EHMT2	Definite	EHMT2	TRIFLUOPERAZINE		DTC
EHMT2	EHMT2	Definite	EHMT2	SPERMIDINE		DTC
EHMT2	EHMT2	Definite	EHMT2	CYCLOSERINE		DTC
EHMT2	EHMT2	Definite	EHMT2	GALLAMINE TRIETHIODIDE		DTC
EHMT2	EHMT2	Definite	EHMT2	PROFLAVINE		DTC
EHMT2	EHMT2	Definite	EHMT2	4-DAMP		DTC
EHMT2	EHMT2	Definite	EHMT2	CHEMBL467987		DTC
EHMT2	EHMT2	Definite	EHMT2	METHIMAZOLE		DTC
EHMT2	EHMT2	Definite	EHMT2	CHEMBL1256678		DTC
EHMT2	EHMT2	Definite	EHMT2	DOPAMINE		DTC
EHMT2	EHMT2	Definite	EHMT2	CHEMBL1489812		DTC
EHMT2	EHMT2	Definite	EHMT2	CAFFEIC ACID PHENETHYL ESTER		DTC
EHMT2	EHMT2	Definite	EHMT2	GANAXOLONE		DTC
EHMT2	EHMT2	Definite	EHMT2	NAFTOPIDIL		DTC
EHMT2	EHMT2	Definite	EHMT2	ERGOCALCIFEROL		DTC
EHMT2	EHMT2	Definite	EHMT2	PROROXAN HYDROCHLORIDE		DTC
EHMT2	EHMT2	Definite	EHMT2	KETANSERIN		DTC
EHMT2	EHMT2	Definite	EHMT2	CHEMBL1567571		DTC
EHMT2	EHMT2	Definite	EHMT2	CHEMBL279556		DTC
EHMT2	EHMT2	Definite	EHMT2	FLUPIRTINE		DTC
EHMT2	EHMT2	Definite	EHMT2	ROTTLERIN		DTC
EHMT2	EHMT2	Definite	EHMT2	DAPH		DTC
EHMT2	EHMT2	Definite	EHMT2	CHEMBL1270169		DTC
EHMT2	EHMT2	Definite	EHMT2	IMIDAZOLE ACETIC ACID		DTC
EHMT2	EHMT2	Definite	EHMT2	CHEMBL458328		DTC
EHMT2	EHMT2	Definite	EHMT2	CAPTAN		DTC
EHMT2	EHMT2	Definite	EHMT2	CHEMBL1256484		DTC
EHMT2	EHMT2	Definite	EHMT2	IODOQUINOL		DTC
EHMT2	EHMT2	Definite	EHMT2	NORFLOXACIN		DTC
EHMT2	EHMT2	Definite	EHMT2	CHEMBL578257		DTC
EHMT2	EHMT2	Definite	EHMT2	2-MERCAPTOBENZOTHIAZOLE		DTC
EHMT2	EHMT2	Definite	EHMT2	CLINAFLOXACIN		DTC
EHMT2	EHMT2	Definite	EHMT2	CHEMBL589421		DTC
EHMT2	EHMT2	Definite	EHMT2	CHEMBL493863		DTC
EHMT2	EHMT2	Definite	EHMT2	SPICLOMAZINE		DTC
EHMT2	EHMT2	Definite	EHMT2	CGP-12177		DTC
EHMT2	EHMT2	Definite	EHMT2	CHEMBL316589		DTC
EHMT2	EHMT2	Definite	EHMT2	HYDROQUINONE		DTC
EHMT2	EHMT2	Definite	EHMT2	CEFOTAXIME		DTC
EHMT2	EHMT2	Definite	EHMT2	CHEMBL1256698		DTC
EHMT2	EHMT2	Definite	EHMT2	CALCIMYCIN		DTC
EHMT2	EHMT2	Definite	EHMT2	CHEMBL602807		DTC
EHMT2	EHMT2	Definite	EHMT2	FLUPHENAZINE		DTC
EHMT2	EHMT2	Definite	EHMT2	GUANIDINONALTRINDOLE		DTC
EHMT2	EHMT2	Definite	EHMT2	OSAJIN		DTC
EHMT2	EHMT2	Definite	EHMT2	OXITRIPTAN		DTC
EHMT2	EHMT2	Definite	EHMT2	BIS(DIMETHYLAMINETHIOCARBONYL)MONOSULFIDE		DTC
EHMT2	EHMT2	Definite	EHMT2	CLORINDIONE		DTC
EHMT2	EHMT2	Definite	EHMT2	2-MERCAPTONICOTINIC ACID		DTC
EHMT2	EHMT2	Definite	EHMT2	ADEFOVIR DIPIVOXIL		DTC
EHMT2	EHMT2	Definite	EHMT2	PIRENZEPINE		DTC
EHMT2	EHMT2	Definite	EHMT2	GUANFACINE		DTC
EHMT2	EHMT2	Definite	EHMT2	DOCONEXENT		DTC
EHMT2	EHMT2	Definite	EHMT2	CHEMBL589469		DTC
EHMT2	EHMT2	Definite	EHMT2	ETHACRYNIC ACID		DTC
EHMT2	EHMT2	Definite	EHMT2	CHEMBL601952		DTC
EHMT2	EHMT2	Definite	EHMT2	CHEMBL580076		DTC
EHMT2	EHMT2	Definite	EHMT2	FIDUXOSIN HYDROCHLORIDE		DTC
EHMT2	EHMT2	Definite	EHMT2	CHEMBL546580		DTC
EHMT2	EHMT2	Definite	EHMT2	THEOPHYLLINE		DTC
EHMT2	EHMT2	Definite	EHMT2	LEVONORDEFRIN		DTC
EHMT2	EHMT2	Definite	EHMT2	CHEMBL1160508		DTC
EHMT2	EHMT2	Definite	EHMT2	SEMAXANIB		DTC
EHMT2	EHMT2	Definite	EHMT2	CHEMBL444928		DTC
EHMT2	EHMT2	Definite	EHMT2	PYRAZOPHOS		DTC
EHMT2	EHMT2	Definite	EHMT2	CHEMBL529361		DTC
EHMT2	EHMT2	Definite	EHMT2	DEOXIEPINEPHRINE		DTC
EHMT2	EHMT2	Definite	EHMT2	QUISQUALATE		DTC
EHMT2	EHMT2	Definite	EHMT2	ENOXIMONE		DTC
EHMT2	EHMT2	Definite	EHMT2	CHEMBL1412002		DTC
EHMT2	EHMT2	Definite	EHMT2	CHEMBL235891		DTC
EHMT2	EHMT2	Definite	EHMT2	CHEMBL586937		DTC
EHMT2	EHMT2	Definite	EHMT2	GAMMA-AMINOBUTYRIC ACID		DTC
EHMT2	EHMT2	Definite	EHMT2	SILIBININ		DTC
EHMT2	EHMT2	Definite	EHMT2	PAROXETINE HYDROCHLORIDE		DTC
EHMT2	EHMT2	Definite	EHMT2	CHLORHEXIDINE		DTC
EHMT2	EHMT2	Definite	EHMT2	TELENZEPINE		DTC
EHMT2	EHMT2	Definite	EHMT2	PYRONIN Y		DTC
EHMT2	EHMT2	Definite	EHMT2	CHEMBL586031		DTC
EHMT2	EHMT2	Definite	EHMT2	CLOSANTEL		DTC
EHMT2	EHMT2	Definite	EHMT2	BOPINDOLOL		DTC
EHMT2	EHMT2	Definite	EHMT2	(D)-SERINE		DTC
EHMT2	EHMT2	Definite	EHMT2	CHEMBL581251		DTC
EHMT2	EHMT2	Definite	EHMT2	CHEMBL590691		DTC
EHMT2	EHMT2	Definite	EHMT2	CHEMBL19954		DTC
EHMT2	EHMT2	Definite	EHMT2	E-64C		DTC
EHMT2	EHMT2	Definite	EHMT2	TRIPROLIDINE		DTC
EHMT2	EHMT2	Definite	EHMT2	CHEMBL601547		DTC
EHMT2	EHMT2	Definite	EHMT2	ALTENUSIN		DTC
EHMT2	EHMT2	Definite	EHMT2	CHEMBL1315166		DTC
EHMT2	EHMT2	Definite	EHMT2	HISPIDIN		DTC
EHMT2	EHMT2	Definite	EHMT2	CHEMBL601968		DTC
EHMT2	EHMT2	Definite	EHMT2	GALLAMINE		DTC
EHMT2	EHMT2	Definite	EHMT2	ISOQUERCETIN		DTC
EHMT2	EHMT2	Definite	EHMT2	CHEMBL1256689		DTC
EHMT2	EHMT2	Definite	EHMT2	CHEMBL580183		DTC
EHMT2	EHMT2	Definite	EHMT2	SULFAPYRIDINE		DTC
EHMT2	EHMT2	Definite	EHMT2	CHEMBL601367		DTC
EHMT2	EHMT2	Definite	EHMT2	CHEMBL1256510		DTC
EHMT2	EHMT2	Definite	EHMT2	CHEMBL600306		DTC
EHMT2	EHMT2	Definite	EHMT2	GALLIC ACID		DTC
EHMT2	EHMT2	Definite	EHMT2	CHEMBL598268		DTC
EHMT2	EHMT2	Definite	EHMT2	DIPYRIDYL		DTC
EHMT2	EHMT2	Definite	EHMT2	CHEMBL600173		DTC
EHMT2	EHMT2	Definite	EHMT2	CHOLECALCIFEROL		DTC
EHMT2	EHMT2	Definite	EHMT2	CHEMBL129841		DTC
EHMT2	EHMT2	Definite	EHMT2	THIRAM		DTC
EHMT2	EHMT2	Definite	EHMT2	SULFADIAZINE, SILVER		DTC
EHMT2	EHMT2	Definite	EHMT2	CHEMBL1256776		DTC
EHMT2	EHMT2	Definite	EHMT2	CHEMBL72365		DTC
EHMT2	EHMT2	Definite	EHMT2	CHEMBL583558		DTC
EHMT2	EHMT2	Definite	EHMT2	FENOLDOPAM		DTC
EHMT2	EHMT2	Definite	EHMT2	PIRETANIDE		DTC
EHMT2	EHMT2	Definite	EHMT2	CHEMBL580851		DTC
EHMT2	EHMT2	Definite	EHMT2	CHEMBL537045		DTC
EHMT2	EHMT2	Definite	EHMT2	CHEMBL1312050		DTC
EHMT2	EHMT2	Definite	EHMT2	CHEMBL601137		DTC
EHMT2	EHMT2	Definite	EHMT2	LUTEOLIN		DTC
EHMT2	EHMT2	Definite	EHMT2	EBSELEN		DTC
EHMT2	EHMT2	Definite	EHMT2	CHEMBL592124		DTC
EHMT2	EHMT2	Definite	EHMT2	ETHOPROPAZINE		DTC
EHMT2	EHMT2	Definite	EHMT2	CEFOTETAN		DTC
EHMT2	EHMT2	Definite	EHMT2	CYSTEAMINE		DTC
EHMT2	EHMT2	Definite	EHMT2	CHEMBL591864		DTC
EHMT2	EHMT2	Definite	EHMT2	N,N-HEXAMETHYLENEAMILORIDE		DTC
EHMT2	EHMT2	Definite	EHMT2	2-METHOXYESTRADIOL		DTC
EHMT2	EHMT2	Definite	EHMT2	LEVISOPRENALINE		DTC
EHMT2	EHMT2	Definite	EHMT2	CHEMBL43078		DTC
EHMT2	EHMT2	Definite	EHMT2	TRIMETREXATE		DTC
EHMT2	EHMT2	Definite	EHMT2	CHEMBL1369632		DTC
EHMT2	EHMT2	Definite	EHMT2	CARUBICIN		DTC
EHMT2	EHMT2	Definite	EHMT2	CHEMBL421215		DTC
EHMT2	EHMT2	Definite	EHMT2	CHEMBL590949		DTC
EHMT2	EHMT2	Definite	EHMT2	CHEMBL35354		DTC
EHMT2	EHMT2	Definite	EHMT2	CHEMBL578896		DTC
EHMT2	EHMT2	Definite	EHMT2	CHEMBL592834		DTC
EHMT2	EHMT2	Definite	EHMT2	DEMECLOCYCLINE HYDROCHLORIDE		DTC
EHMT2	EHMT2	Definite	EHMT2	CHEMBL584868		DTC
EHMT2	EHMT2	Definite	EHMT2	TREQUINSIN HYDROCHLORIDE		DTC
EHMT2	EHMT2	Definite	EHMT2	CHEMBL602408		DTC
EHMT2	EHMT2	Definite	EHMT2	CHEMBL585269		DTC
EHMT2	EHMT2	Definite	EHMT2	CHEMBL297784		DTC
EHMT2	EHMT2	Definite	EHMT2	CHEMBL601744		DTC
EHMT2	EHMT2	Definite	EHMT2	CHEMBL1256984		DTC
EHMT2	EHMT2	Definite	EHMT2	CHEMBL580816		DTC
EHMT2	EHMT2	Definite	EHMT2	CHEMBL529741		DTC
EHMT2	EHMT2	Definite	EHMT2	RESVERATROL		DTC
EHMT2	EHMT2	Definite	EHMT2	CHEMBL1546228		DTC
EHMT2	EHMT2	Definite	EHMT2	PYRITHIONE		DTC
EHMT2	EHMT2	Definite	EHMT2	CHEMBL600738		DTC
EHMT2	EHMT2	Definite	EHMT2	CHEMBL578675		DTC
EHMT2	EHMT2	Definite	EHMT2	CHEMBL388979		DTC
EHMT2	EHMT2	Definite	EHMT2	TRITIOZINE		DTC
EHMT2	EHMT2	Definite	EHMT2	GYKI-52466		DTC
EHMT2	EHMT2	Definite	EHMT2	ZAPRINAST		DTC
EHMT2	EHMT2	Definite	EHMT2	EPIGALOCATECHIN GALLATE		DTC
EHMT2	EHMT2	Definite	EHMT2	NIMUSTINE		DTC
EHMT2	EHMT2	Definite	EHMT2	CHEMBL275177		DTC
EHMT2	EHMT2	Definite	EHMT2	(4-CHLOROPHENYL)(MORPHOLINO)METHANETHIONE		DTC
EHMT2	EHMT2	Definite	EHMT2	HYDROXYZINE PAMOATE		DTC
EHMT2	EHMT2	Definite	EHMT2	ETHAMSYLATE		DTC
EHMT2	EHMT2	Definite	EHMT2	TYRPHOSTIN 25		DTC
EHMT2	EHMT2	Definite	EHMT2	AMSACRINE HYDROCHLORIDE		DTC
EHMT2	EHMT2	Definite	EHMT2	PROPRANOLOL		DTC
EHMT2	EHMT2	Definite	EHMT2	ENCLOMIPHENE CITRATE		DTC
EHMT2	EHMT2	Definite	EHMT2	CHEMBL591630		DTC
EHMT2	EHMT2	Definite	EHMT2	CHEMBL525888		DTC
EHMT2	EHMT2	Definite	EHMT2	DILTIAZEM HYDROCHLORIDE		DTC
EHMT2	EHMT2	Definite	EHMT2	PROMETHAZINE		DTC
EHMT2	EHMT2	Definite	EHMT2	CHEMBL1256876		DTC
EHMT2	EHMT2	Definite	EHMT2	HISTIDINE		DTC
EHMT2	EHMT2	Definite	EHMT2	DOCEBENONE		DTC
EHMT2	EHMT2	Definite	EHMT2	CHEMBL605959		DTC
EHMT2	EHMT2	Definite	EHMT2	PIRENZEPINE HYDROCHLORIDE		DTC
EHMT2	EHMT2	Definite	EHMT2	CHEMBL451722		DTC
EHMT2	EHMT2	Definite	EHMT2	DIHYDREXIDINE HYDROCHLORIDE		DTC
EHMT2	EHMT2	Definite	EHMT2	RESERPINE		DTC
EHMT2	EHMT2	Definite	EHMT2	ICRF-193		DTC
EHMT2	EHMT2	Definite	EHMT2	DEPHOSTATIN		DTC
EHMT2	EHMT2	Definite	EHMT2	METAPHIT METHANESULFONATE		DTC
EHMT2	EHMT2	Definite	EHMT2	CHEMBL534214		DTC
EHMT2	EHMT2	Definite	EHMT2	INDIRUBIN-3-MONOXIME		DTC
EHMT2	EHMT2	Definite	EHMT2	CHEMBL603024		DTC
EHMT2	EHMT2	Definite	EHMT2	HELENALIN		DTC
EHMT2	EHMT2	Definite	EHMT2	CHLOROQUINE		DTC
EHMT2	EHMT2	Definite	EHMT2	ELLIPTECINE		DTC
EHMT2	EHMT2	Definite	EHMT2	CHAETOCIN		DTC
EHMT2	EHMT2	Definite	EHMT2	CHEMBL607309		DTC
EHMT2	EHMT2	Definite	EHMT2	HARPAGOSIDE		DTC
EHMT2	EHMT2	Definite	EHMT2	METIZOLINE		DTC
EHMT2	EHMT2	Definite	EHMT2	CHEMBL227959		DTC
EHMT2	EHMT2	Definite	EHMT2	NISOLDIPINE		DTC
EHMT2	EHMT2	Definite	EHMT2	E319		DTC
EHMT2	EHMT2	Definite	EHMT2	ISOCONAZOLE		DTC
EHMT2	EHMT2	Definite	EHMT2	CHEMBL579742		DTC
EHMT2	EHMT2	Definite	EHMT2	CHEMBL586029		DTC
EHMT2	EHMT2	Definite	EHMT2	NICOTINE BITARTRATE		DTC
EHMT2	EHMT2	Definite	EHMT2	CHEMBL139935		DTC
EHMT2	EHMT2	Definite	EHMT2	PROROXAN		DTC
EHMT2	EHMT2	Definite	EHMT2	BROMOCRIPTINE		DTC
EHMT2	EHMT2	Definite	EHMT2	CHEMBL590706		DTC
EHMT2	EHMT2	Definite	EHMT2	AURINTRICARBOXYLIC ACID		DTC
EHMT2	EHMT2	Definite	EHMT2	QUINACRINE DIHYDROCHLORIDE		DTC
EHMT2	EHMT2	Definite	EHMT2	SKF-38393		DTC
EHMT2	EHMT2	Definite	EHMT2	METHOTREXATE		DTC
EHMT2	EHMT2	Definite	EHMT2	PHENANTHROLINE		DTC
EHMT2	EHMT2	Definite	EHMT2	CHEMBL1079460		DTC
EHMT2	EHMT2	Definite	EHMT2	CHEMBL322970		DTC
EHMT2	EHMT2	Definite	EHMT2	DEFERIPRONE		DTC
EHMT2	EHMT2	Definite	EHMT2	SULINDAC SULFOXIDE		DTC
EHMT2	EHMT2	Definite	EHMT2	N-METHYLHISTAMINE		DTC
EHMT2	EHMT2	Definite	EHMT2	METRAZOLINE OXALATE		DTC
EHMT2	EHMT2	Definite	EHMT2	CHEMBL1256396		DTC
EHMT2	EHMT2	Definite	EHMT2	LAVENDUSTIN C		DTC
EHMT2	EHMT2	Definite	EHMT2	CHEMBL1256738		DTC
EHMT2	EHMT2	Definite	EHMT2	TOLFENAMIC ACID		DTC
EHMT2	EHMT2	Definite	EHMT2	OXOTREMORINE METHIODIDE		DTC
EHMT2	EHMT2	Definite	EHMT2	CHEMBL492528		DTC
EHMT2	EHMT2	Definite	EHMT2	TAMOXIFEN CITRATE		DTC
EHMT2	EHMT2	Definite	EHMT2	MESORIDAZINE		DTC
EHMT2	EHMT2	Definite	EHMT2	CHEMBL387632		DTC
EHMT2	EHMT2	Definite	EHMT2	CHEMBL1728978		DTC
EHMT2	EHMT2	Definite	EHMT2	CHEMBL1537417		DTC
EHMT2	EHMT2	Definite	EHMT2	CAPTOPRIL		DTC
EHMT2	EHMT2	Definite	EHMT2	CHEMBL77387		DTC
EHMT2	EHMT2	Definite	EHMT2	SALICYLHYDROXAMIC ACID		DTC
EHMT2	EHMT2	Definite	EHMT2	CGS-15943		DTC
EHMT2	EHMT2	Definite	EHMT2	SYROSINGOPINE		DTC
EHMT2	EHMT2	Definite	EHMT2	URAPIDIL		DTC
EHMT2	EHMT2	Definite	EHMT2	CHEMBL533577		DTC
EHMT2	EHMT2	Definite	EHMT2	CHEMBL538104		DTC
EHMT2	EHMT2	Definite	EHMT2	CHEMBL189753		DTC
EHMT2	EHMT2	Definite	EHMT2	NICARDIPINE		DTC
EHMT2	EHMT2	Definite	EHMT2	DAUNORUBICIN HYDROCHLORIDE		DTC
EHMT2	EHMT2	Definite	EHMT2	PUTRESCINE DIHYDROCHLORIDE		DTC
EHMT2	EHMT2	Definite	EHMT2	ZIPRASIDONE		DTC
EHMT2	EHMT2	Definite	EHMT2	DIBROMOTYROSINE		DTC
EHMT2	EHMT2	Definite	EHMT2	4-CHLOROMERCURIBENZOIC ACID		DTC
EHMT2	EHMT2	Definite	EHMT2	CHEMBL275311		DTC
EHMT2	EHMT2	Definite	EHMT2	HYPOTAURINE		DTC
EHMT2	EHMT2	Definite	EHMT2	CHEMBL522983		DTC
EHMT2	EHMT2	Definite	EHMT2	CYCLOPIAZONIC ACID		DTC
EHMT2	EHMT2	Definite	EHMT2	1,2-NAPHTHOQUINONE		DTC
EHMT2	EHMT2	Definite	EHMT2	TYRPHOSTIN 23		DTC
EHMT2	EHMT2	Definite	EHMT2	CHEMBL398765		DTC
EHMT2	EHMT2	Definite	EHMT2	CHEMBL605003		DTC
EHMT2	EHMT2	Definite	EHMT2	MIFEPRISTONE		DTC
EHMT2	EHMT2	Definite	EHMT2	FLUMEQUINE		DTC
EHMT2	EHMT2	Definite	EHMT2	CHEMBL589715		DTC
EHMT2	EHMT2	Definite	EHMT2	CEPHAPIRIN SODIUM		DTC
EHMT2	EHMT2	Definite	EHMT2	CHEMBL588038		DTC
EHMT2	EHMT2	Definite	EHMT2	2'-HYDROXYCHALCONE		DTC
EHMT2	EHMT2	Definite	EHMT2	CHEMBL585628		DTC
EHMT2	EHMT2	Definite	EHMT2	CHEMBL534288		DTC
EHMT2	EHMT2	Definite	EHMT2	TYRPHOSTIN 51		DTC
EHMT2	EHMT2	Definite	EHMT2	CEFACLOR		DTC
EHMT2	EHMT2	Definite	EHMT2	CHEMBL26320		DTC
EHMT2	EHMT2	Definite	EHMT2	ACID BLUE 129		DTC
EHMT2	EHMT2	Definite	EHMT2	TYRPHOSTIN A9		DTC
EHMT2	EHMT2	Definite	EHMT2	TRICHOSTATIN		DTC
EHMT2	EHMT2	Definite	EHMT2	COCLAURINE		DTC
EHMT2	EHMT2	Definite	EHMT2	HARMOL		DTC
EHMT2	EHMT2	Definite	EHMT2	CHELERYTHRINE CHLORIDE		DTC
EHMT2	EHMT2	Definite	EHMT2	HYDRALAZINE		DTC
EHMT2	EHMT2	Definite	EHMT2	SYMCLOSENE		DTC
EHMT2	EHMT2	Definite	EHMT2	CHEMBL1576310		DTC
EHMT2	EHMT2	Definite	EHMT2	CITALOPRAM		DTC
EHMT2	EHMT2	Definite	EHMT2	MAPROTILINE HYDROCHLORIDE		DTC
EHMT2	EHMT2	Definite	EHMT2	PERAZINE		DTC
EHMT2	EHMT2	Definite	EHMT2	2-PICOLINIC ACID		DTC
EHMT2	EHMT2	Definite	EHMT2	DECYLUBIQUINONE		DTC
EHMT2	EHMT2	Definite	EHMT2	CHEMBL104264		DTC
EHMT2	EHMT2	Definite	EHMT2	CHEMBL589670		DTC
EHMT2	EHMT2	Definite	EHMT2	CAFFEIC ACID		DTC
EHMT2	EHMT2	Definite	EHMT2	1-AMINOCYCLOPROPANE CARBOXYLIC ACID		DTC
EHMT2	EHMT2	Definite	EHMT2	CHEMBL127421		DTC
EHMT2	EHMT2	Definite	EHMT2	CHEMBL582478		DTC
EHMT2	EHMT2	Definite	EHMT2	DIPYRIDAMOLE		DTC
EHMT2	EHMT2	Definite	EHMT2	LOVASTATIN		DTC
EHMT2	EHMT2	Definite	EHMT2	CHEMBL602923		DTC
EHMT2	EHMT2	Definite	EHMT2	CHEMBL1385558		DTC
EHMT2	EHMT2	Definite	EHMT2	NOREPINEPHRINE		DTC
EHMT2	EHMT2	Definite	EHMT2	CHEMBL321585		DTC
EHMT2	EHMT2	Definite	EHMT2	CHEMBL1256885		DTC
EHMT2	EHMT2	Definite	EHMT2	ERBSTATIN		DTC
EHMT2	EHMT2	Definite	EHMT2	PICEATANNOL		DTC
EHMT2	EHMT2	Definite	EHMT2	ICILLIN		DTC
EHMT2	EHMT2	Definite	EHMT2	CHEMBL601605		DTC
EHMT2	EHMT2	Definite	EHMT2	CHEMBL547833		DTC
EHMT2	EHMT2	Definite	EHMT2	CHEMBL1510164		DTC
EHMT2	EHMT2	Definite	EHMT2	DACTINOMYCIN		DTC
EHMT2	EHMT2	Definite	EHMT2	FLUNARIZINE		DTC
EHMT2	EHMT2	Definite	EHMT2	HINOKITIOL		DTC
EHMT2	EHMT2	Definite	EHMT2	BAY-11-7085		DTC
EHMT2	EHMT2	Definite	EHMT2	DIHYDROXIDINE		DTC
EHMT2	EHMT2	Definite	EHMT2	METHAZOLAMIDE		DTC
EHMT2	EHMT2	Definite	EHMT2	DIHYDRALAZINE		DTC
EHMT2	EHMT2	Definite	EHMT2	CHEMBL118378		DTC
EHMT2	EHMT2	Definite	EHMT2	QUINPIROLE		DTC
EHMT2	EHMT2	Definite	EHMT2	LIPOIC ACID, ALPHA		DTC
EHMT2	EHMT2	Definite	EHMT2	CHEMBL1451216		DTC
EHMT2	EHMT2	Definite	EHMT2	ISOETHARINE		DTC
EHMT2	EHMT2	Definite	EHMT2	CHEMBL338115		DTC
EHMT2	EHMT2	Definite	EHMT2	CHEMBL1256174		DTC
EHMT2	EHMT2	Definite	EHMT2	CORYNANTHEINE		DTC
EHMT2	EHMT2	Definite	EHMT2	CHEMBL2374078		DTC
EHMT2	EHMT2	Definite	EHMT2	CHEMBL80155		DTC
EHMT2	EHMT2	Definite	EHMT2	CHEMBL597246		DTC
EHMT2	EHMT2	Definite	EHMT2	RANITIDINE		DTC
EHMT2	EHMT2	Definite	EHMT2	SERTACONAZOLE NITRATE		DTC
EHMT2	EHMT2	Definite	EHMT2	CHEMBL328710		DTC
EHMT2	EHMT2	Definite	EHMT2	CHEMBL313938		DTC
EHMT2	EHMT2	Definite	EHMT2	CHEMBL584248		DTC
EHMT2	EHMT2	Definite	EHMT2	ESTRADIOL		DTC
EHMT2	EHMT2	Definite	EHMT2	BROMOCRIPTINE MESYLATE		DTC
EHMT2	EHMT2	Definite	EHMT2	PROMAZINE HYDROCHLORIDE		DTC
EHMT2	EHMT2	Definite	EHMT2	CHEMBL1408276		DTC
EHMT2	EHMT2	Definite	EHMT2	CHEMBL584635		DTC
EHMT2	EHMT2	Definite	EHMT2	SHIKONIN		DTC
EHMT2	EHMT2	Definite	EHMT2	TINORIDINE		DTC
EHMT2	EHMT2	Definite	EHMT2	CLOFAZIMINE		DTC
EHMT2	EHMT2	Definite	EHMT2	CYCLOBENZAPRINE HYDROCHLORIDE		DTC
EHMT2	EHMT2	Definite	EHMT2	RUFLOXACIN		DTC
EHMT2	EHMT2	Definite	EHMT2	CHEMBL531322		DTC
EHMT2	EHMT2	Definite	EHMT2	CHEMBL602776		DTC
EHMT2	EHMT2	Definite	EHMT2	CHEMBL580340		DTC
EHMT2	EHMT2	Definite	EHMT2	CHEMBL591404		DTC
EHMT2	EHMT2	Definite	EHMT2	3,5-DINITROCATECHOL (OR-486)		DTC
EHMT2	EHMT2	Definite	EHMT2	SANGUINARIUM		DTC
EHMT2	EHMT2	Definite	EHMT2	SEROTONIN HYDROCHLORIDE		DTC
EHMT2	EHMT2	Definite	EHMT2	DIPHOSPHOMETHYLPHOSPHONIC ACID ADENOSYL ESTER		DTC
EHMT2	EHMT2	Definite	EHMT2	CHEMBL553503		DTC
EHMT2	EHMT2	Definite	EHMT2	CHEMBL530698		DTC
EHMT2	EHMT2	Definite	EHMT2	CHEMBL258756		DTC
EHMT2	EHMT2	Definite	EHMT2	STREPTOMYCIN		DTC
EHMT2	EHMT2	Definite	EHMT2	LINSIDOMINE		DTC
EHMT2	EHMT2	Definite	EHMT2	THIORIDAZINE		DTC
EHMT2	EHMT2	Definite	EHMT2	SARCOLYSIN		DTC
EHMT2	EHMT2	Definite	EHMT2	CEPHALOTHIN		DTC
EHMT2	EHMT2	Definite	EHMT2	PYRAZINOIC ACID		DTC
EHMT2	EHMT2	Definite	EHMT2	BETAINE HYDROCHLORIDE		DTC
EHMT2	EHMT2	Definite	EHMT2	PAXILLINE		DTC
EHMT2	EHMT2	Definite	EHMT2	CHEMBL585656		DTC
EHMT2	EHMT2	Definite	EHMT2	CHEMBL590672		DTC
EHMT2	EHMT2	Definite	EHMT2	CHEMBL590666		DTC
EHMT2	EHMT2	Definite	EHMT2	DIAZOXIDE		DTC
EHMT2	EHMT2	Definite	EHMT2	LEVODOPA		DTC
EHMT2	EHMT2	Definite	EHMT2	CEFAMANDOLE SODIUM		DTC
EHMT2	EHMT2	Definite	EHMT2	ALITRETINOIN		DTC
EHMT2	EHMT2	Definite	EHMT2	VITAMIN B2		DTC
EHMT2	EHMT2	Definite	EHMT2	EMODIN		DTC
EHMT2	EHMT2	Definite	EHMT2	NICLOSAMIDE		DTC
EHMT2	EHMT2	Definite	EHMT2	DIOTYROSINE		DTC
EHMT2	EHMT2	Definite	EHMT2	THIETHYLPERAZINE MALATE		DTC
EHMT2	EHMT2	Definite	EHMT2	CHEMBL589734		DTC
EHMT2	EHMT2	Definite	EHMT2	CYSTAMINE DIHYDROCHLORIDE		DTC
EHMT2	EHMT2	Definite	EHMT2	BENZOPHENONE-THIOSEMICARBAZONE		DTC
EHMT2	EHMT2	Definite	EHMT2	CHEMBL578741		DTC
EHMT2	EHMT2	Definite	EHMT2	CIANIDANOL		DTC
EHMT2	EHMT2	Definite	EHMT2	CEPHALOTHIN SODIUM		DTC
EHMT2	EHMT2	Definite	EHMT2	5-BENZYLOXYTRYPTAMINE		DTC
EHMT2	EHMT2	Definite	EHMT2	CHEMBL343002		DTC
EHMT2	EHMT2	Definite	EHMT2	GLAUCINE METHIODIDE		DTC
EHMT2	EHMT2	Definite	EHMT2	DEQUALINIUM CHLORIDE		DTC
EHMT2	EHMT2	Definite	EHMT2	CITICOLINE SODIUM		DTC
EHMT2	EHMT2	Definite	EHMT2	CHEMBL505670		DTC
EHMT2	EHMT2	Definite	EHMT2	CAPSAZEPINE		DTC
EHMT2	EHMT2	Definite	EHMT2	TOLAZAMIDE		DTC
EHMT2	EHMT2	Definite	EHMT2	ISOETHARINE MESYLATE		DTC
EHMT2	EHMT2	Definite	EHMT2	CHEMBL1605629		DTC
EHMT2	EHMT2	Definite	EHMT2	LONIDAMINE		DTC
EHMT2	EHMT2	Definite	EHMT2	CHEMBL1306524		DTC
EHMT2	EHMT2	Definite	EHMT2	CLOMETHIAZOLE		DTC
EHMT2	EHMT2	Definite	EHMT2	WORTMANNIN		DTC
EHMT2	EHMT2	Definite	EHMT2	CHEMBL211670		DTC
EHMT2	EHMT2	Definite	EHMT2	HEMICHOLINIUM-3		DTC
EHMT2	EHMT2	Definite	EHMT2	ACETAMIDE		DTC
EHMT2	EHMT2	Definite	EHMT2	MESALAMINE		DTC
EHMT2	EHMT2	Definite	EHMT2	CHEMBL599013		DTC
EHMT2	EHMT2	Definite	EHMT2	AMARANTH		DTC
EHMT2	EHMT2	Definite	EHMT2	CHEMBL533954		DTC
EHMT2	EHMT2	Definite	EHMT2	CHEMBL88553		DTC
EHMT2	EHMT2	Definite	EHMT2	CHEMBL53898		DTC
EHMT2	EHMT2	Definite	EHMT2	LYCOPENE		DTC
EHMT2	EHMT2	Definite	EHMT2	CGP-71683A		DTC
EHMT2	EHMT2	Definite	EHMT2	PYRITHIONE ZINC		DTC
EHMT2	EHMT2	Definite	EHMT2	RAZOXANE		DTC
EHMT2	EHMT2	Definite	EHMT2	CHEMBL1363249		DTC
EHMT2	EHMT2	Definite	EHMT2	CHEMBL602969		DTC
EHMT2	EHMT2	Definite	EHMT2	MYRICETIN		DTC
EHMT2	EHMT2	Definite	EHMT2	CYCLIC ADENOSINE MONOPHOSPHATE		DTC
EHMT2	EHMT2	Definite	EHMT2	RESCINNAMINE		DTC
EHMT2	EHMT2	Definite	EHMT2	CHEMBL476025		DTC
EHMT2	EHMT2	Definite	EHMT2	CHEMBL589479		DTC
EHMT2	EHMT2	Definite	EHMT2	CHEMBL32307		DTC
EHMT2	EHMT2	Definite	EHMT2	OMEPRAZOLE		DTC
EHMT2	EHMT2	Definite	EHMT2	CHEMBL1504679		DTC
EHMT2	EHMT2	Definite	EHMT2	TROLOX		DTC
EHMT2	EHMT2	Definite	EHMT2	DIMERCAPROL		DTC
EHMT2	EHMT2	Definite	EHMT2	CHEMBL609036		DTC
EHMT2	EHMT2	Definite	EHMT2	PROTOAPIGENONE		DTC
EHMT2	EHMT2	Definite	EHMT2	IMETIT DIHYDROBROMIDE		DTC
EHMT2	EHMT2	Definite	EHMT2	ARACHIDONOYL DOPAMINE		DTC
EHMT2	EHMT2	Definite	EHMT2	CHEMBL411085		DTC
GALNT2	GALNT2	Definite	GALNT2	ATENOLOL		PharmGKB
DPEP1	DPEP1	Definite	DPEP1	CILASTATIN	inhibitor	TdgClinicalTrial|TEND|TTD	2571484|3474745|3780719|3480361|3038022|7492120|9573653|11752352|17139284|17016423
DPEP1	DPEP1	Definite	DPEP1	CILASTATIN SODIUM	inhibitor	ChemblInteractions
DPEP1	DPEP1	Definite	DPEP1	DEXAMETHASONE		NCI	9806799
PAK6	PAK6	Definite	PAK6	GSK-690693	inhibitor	GuideToPharmacology
PAK6	PAK6	Definite	PAK6	PF-03758309	inhibitor	GuideToPharmacology
EP300	EP300	Definite	EP300	CHEMBL1797707		DTC	21292492
EP300	EP300	Definite	EP300	CHEMBL404916		DTC	21292492
EP300	EP300	Definite	EP300	CHEMBL257748		DTC	21292492
EP300	EP300	Definite	EP300	CHEMBL1797708		DTC	21292492
EP300	EP300	Definite	EP300	CURCUMIN	inhibitor	GuideToPharmacology
EP300	EP300	Definite	EP300	GARCINOL	inhibitor	DTC|GuideToPharmacology	19086895
EP300	EP300	Definite	EP300	PLUMBAGIN	inhibitor	GuideToPharmacology
PTK6	PTK6	Definite	PTK6	TAE-684		DTC
PTK6	PTK6	Definite	PTK6	OSI-632		DTC
PTK6	PTK6	Definite	PTK6	CEDIRANIB		DTC
PTK6	PTK6	Definite	PTK6	SB-202190		DTC	22951114
PTK6	PTK6	Definite	PTK6	VANDETANIB	inhibitor	ChemblInteractions
PTK6	PTK6	Definite	PTK6	DASATINIB		DTC
PTK6	PTK6	Definite	PTK6	R-406		DTC
PTK6	PTK6	Definite	PTK6	TAK-715		DTC
CACNA1D	CACNA1D	Definite	CACNA1D	FELODIPINE	inhibitor|blocker	TdgClinicalTrial|ChemblInteractions	19029287
CACNA1D	CACNA1D	Definite	CACNA1D	VERAPAMIL HYDROCHLORIDE	blocker	ChemblInteractions
CACNA1D	CACNA1D	Definite	CACNA1D	CELECOXIB		PharmGKB	22336956
CACNA1D	CACNA1D	Definite	CACNA1D	ISRADIPINE	blocker|inhibitor	ChemblInteractions|GuideToPharmacology	11285265|19029287
CACNA1D	CACNA1D	Definite	CACNA1D	GABAPENTIN	modulator	ChemblInteractions
CACNA1D	CACNA1D	Definite	CACNA1D	DRONEDARONE HYDROCHLORIDE	blocker	ChemblInteractions
CACNA1D	CACNA1D	Definite	CACNA1D	VERAPAMIL	blocker|inhibitor	TdgClinicalTrial|TEND|GuideToPharmacology	19125880
CACNA1D	CACNA1D	Definite	CACNA1D	AMLODIPINE MALEATE	blocker	ChemblInteractions
CACNA1D	CACNA1D	Definite	CACNA1D	AMLODIPINE	inhibitor	TdgClinicalTrial|GuideToPharmacology	19029287
CACNA1D	CACNA1D	Definite	CACNA1D	NIFEDIPINE	blocker|inhibitor	ChemblInteractions|GuideToPharmacology	19029287|11160515
CACNA1D	CACNA1D	Definite	CACNA1D	CLEVIDIPINE	blocker	TdgClinicalTrial|ChemblInteractions	15492770
CACNA1D	CACNA1D	Definite	CACNA1D	AMLODIPINE BESYLATE	blocker	ChemblInteractions
CACNA1D	CACNA1D	Definite	CACNA1D	GABAPENTIN ENACARBIL	modulator	ChemblInteractions
CACNA1D	CACNA1D	Definite	CACNA1D	ATAGABALIN	modulator	ChemblInteractions
CACNA1D	CACNA1D	Definite	CACNA1D	NISOLDIPINE	inhibitor|blocker	ChemblInteractions	19029287
CACNA1D	CACNA1D	Definite	CACNA1D	NICARDIPINE HYDROCHLORIDE	blocker	ChemblInteractions
CACNA1D	CACNA1D	Definite	CACNA1D	NIMODIPINE	inhibitor|blocker	ChemblInteractions	20661350|17705883|19029287|20335610|20334460|19844625
CACNA1D	CACNA1D	Definite	CACNA1D	AZD1305	blocker	ChemblInteractions
CACNA1D	CACNA1D	Definite	CACNA1D	BEPRIDIL HYDROCHLORIDE	blocker	ChemblInteractions
CACNA1D	CACNA1D	Definite	CACNA1D	AZIDOPINE	inhibitor	GuideToPharmacology
CACNA1D	CACNA1D	Definite	CACNA1D	ELPETRIGINE	blocker	ChemblInteractions
CACNA1D	CACNA1D	Definite	CACNA1D	DILTIAZEM MALATE	blocker	ChemblInteractions
CACNA1D	CACNA1D	Definite	CACNA1D	NITRENDIPINE	inhibitor	GuideToPharmacology	19029287|1846597
CACNA1D	CACNA1D	Definite	CACNA1D	IMAGABALIN	modulator	ChemblInteractions
CACNA1D	CACNA1D	Definite	CACNA1D	DILTIAZEM HYDROCHLORIDE	blocker	ChemblInteractions
CACNA1D	CACNA1D	Definite	CACNA1D	PREGABALIN	modulator	ChemblInteractions
MAP3K11	MAP3K11	Definite	MAP3K11	CEP-1347	inhibitor	DTC|ChemblInteractions|GuideToPharmacology	24044867
RNF112	RNF112	Definite	RNF112	ALCOHOL		NCI	12805289
NDUFA2	NDUFA2	Definite	NDUFA2	NV-128	inhibitor	ChemblInteractions
NDUFA2	NDUFA2	Definite	NDUFA2	ME-344	inhibitor	ChemblInteractions
NDUFA2	NDUFA2	Definite	NDUFA2	METFORMIN HYDROCHLORIDE	inhibitor	ChemblInteractions
DDR1	DDR1	Definite	DDR1	MERESTINIB	inhibitor	GuideToPharmacology
DDR1	DDR1	Definite	DDR1	NILOTINIB	inhibitor	GuideToPharmacology
DDR1	DDR1	Definite	DDR1	IMATINIB	inhibitor|antagonist	TdgClinicalTrial|TEND|GuideToPharmacology	16298518|15972446|15994946|16168515|16401709
ACYP2	ACYP2	Definite	ACYP2	CISPLATIN		PharmGKB	26928270|31666714
PPP1R18	PPP1R18	Definite	PPP1R18	CARBOPLATIN		PharmGKB	31616045
PPP1R18	PPP1R18	Definite	PPP1R18	GEMCITABINE		PharmGKB	31616045
MSH5	MSH5	Definite	MSH5	GEMCITABINE		PharmGKB	31616045
MSH5	MSH5	Definite	MSH5	CARBOPLATIN		PharmGKB	31616045
XRCC3	XRCC3	Definite	XRCC3	IRINOTECAN		PharmGKB	17549067
XRCC3	XRCC3	Definite	XRCC3	FLUOROURACIL		PharmGKB	17549067
XRCC3	XRCC3	Definite	XRCC3	LEUCOVORIN		PharmGKB	17549067
ITIH3	ITIH3	Definite	ITIH3	CLOZAPINE		PharmGKB	27396837
CRHR1	CRHR1	Definite	CRHR1	VERUCERFONT	antagonist	ChemblInteractions|GuideToPharmacology|TTD
CRHR1	CRHR1	Definite	CRHR1	ANTALARMIN	antagonist	GuideToPharmacology
CRHR1	CRHR1	Definite	CRHR1	CORTICOTROPIN RELEASING HORMONE	agonist	GuideToPharmacology
CRHR1	CRHR1	Definite	CRHR1	SSR125543	antagonist	ChemblInteractions|TTD
CRHR1	CRHR1	Definite	CRHR1	ONO-2333MS	antagonist	ChemblInteractions|GuideToPharmacology|TTD
CRHR1	CRHR1	Definite	CRHR1	FLUOXETINE		PharmGKB	17258395
CRHR1	CRHR1	Definite	CRHR1	SAUVAGINE	agonist	GuideToPharmacology
CRHR1	CRHR1	Definite	CRHR1	BUDESONIDE		PharmGKB	19210659|15128701|22248724|18539200
CRHR1	CRHR1	Definite	CRHR1	TELAVANCIN		TTD
CRHR1	CRHR1	Definite	CRHR1	EMICERFONT	antagonist	ChemblInteractions
CRHR1	CRHR1	Definite	CRHR1	TRIAMCINOLONE		PharmGKB	19210659|15128701|22248724|18539200
CRHR1	CRHR1	Definite	CRHR1	PEXACERFONT	antagonist	ChemblInteractions|GuideToPharmacology|TTD
MMP16	MMP16	Definite	MMP16	ILOMASTAT	inhibitor	GuideToPharmacology
NT5C2	NT5C2	Definite	NT5C2	DIDANOSINE		PharmGKB	23315321
NT5C2	NT5C2	Definite	NT5C2	GEMCITABINE		PharmGKB	22838949|24300978
NT5C2	NT5C2	Definite	NT5C2	MERCAPTOPURINE		CIViC|PharmGKB	15990089|23377183|23377281
NT5C2	NT5C2	Definite	NT5C2	THIOGUANINE		CIViC	23377183|23377281
NT5C2	NT5C2	Definite	NT5C2	CYTARABINE		PharmGKB
HLA-C	HLA-C	Definite	HLA-C	FLOXACILLIN		PharmGKB	30664875
HLA-C	HLA-C	Definite	HLA-C	CLAVULANIC ACID		PharmGKB	30664875
HLA-C	HLA-C	Definite	HLA-C	AMOXICILLIN		PharmGKB	30664875
HLA-C	HLA-C	Definite	HLA-C	METHOTREXATE		PharmGKB	28444425
HLA-C	HLA-C	Definite	HLA-C	RIBAVIRIN		PharmGKB
HLA-C	HLA-C	Definite	HLA-C	USTEKINUMAB		PharmGKB	23521149
HLA-C	HLA-C	Definite	HLA-C	CLOZAPINE		PharmGKB	11266078
HLA-C	HLA-C	Definite	HLA-C	METHAZOLAMIDE		PharmGKB	30242287|20504258|25918017
HLA-C	HLA-C	Definite	HLA-C	LAMOTRIGINE		PharmGKB	19668019
HLA-C	HLA-C	Definite	HLA-C	CARBOPLATIN		PharmGKB	31616045
HLA-C	HLA-C	Definite	HLA-C	TICLOPIDINE		PharmGKB	17339877
HLA-C	HLA-C	Definite	HLA-C	GEMCITABINE		PharmGKB	31616045
VPS37A	VPS37A	Definite	VPS37A	CETUXIMAB		CIViC	22016507
TNFRSF13C	TNFRSF13C	Definite	TNFRSF13C	ARDENERMIN		GuideToPharmacology
APH1A	APH1A	Definite	APH1A	SEMAGACESTAT	inhibitor	DTC|ChemblInteractions	19443228
APH1A	APH1A	Definite	APH1A	IC261		DTC	20350806
APH1A	APH1A	Definite	APH1A	TARENFLURBIL	modulator	ChemblInteractions
APH1A	APH1A	Definite	APH1A	CHEMBL247471		TdgClinicalTrial
APH1A	APH1A	Definite	APH1A	BEGACESTAT	inhibitor	ChemblInteractions
APH1A	APH1A	Definite	APH1A	METHYLINOSITOL		TdgClinicalTrial
APH1A	APH1A	Definite	APH1A	AVAGACESTAT	inhibitor	TdgClinicalTrial|ChemblInteractions
APH1A	APH1A	Definite	APH1A	GSI-136		TdgClinicalTrial
APH1A	APH1A	Definite	APH1A	MK-0752		ClearityFoundationClinicalTrial
APH1A	APH1A	Definite	APH1A	CHEMBL392068		DTC	23181502|19443228
RPTOR	RPTOR	Definite	RPTOR	EVEROLIMUS		PharmGKB
RPTOR	RPTOR	Definite	RPTOR	AZD-8055	inhibitor	MyCancerGenome
RPTOR	RPTOR	Definite	RPTOR	SAPANISERTIB	inhibitor	MyCancerGenome
RPTOR	RPTOR	Definite	RPTOR	OSI-027	inhibitor	MyCancerGenome
FES	FES	Definite	FES	HESPERADIN	inhibitor	DTC	19035792
FES	FES	Definite	FES	LINIFANIB		DTC
FES	FES	Definite	FES	SP-600125		DTC
FES	FES	Definite	FES	LORLATINIB	inhibitor	GuideToPharmacology
FES	FES	Definite	FES	DASATINIB		DTC
FUT2	FUT2	Definite	FUT2	ALCOHOL		PharmGKB	32451486
MED19	MED19	Definite	MED19	ALCOHOL		PharmGKB	32451486
LPAR2	LPAR2	Definite	LPAR2	CAFFEINE		NCI	10199823
LPAR2	LPAR2	Definite	LPAR2	MORPHINE		NCI	17090705
LPAR2	LPAR2	Definite	LPAR2	OCTREOTIDE		NCI	18624922
HYKK	HYKK	Definite	HYKK	VARENICLINE		PharmGKB
KLC1	KLC1	Definite	KLC1	FLUOROURACIL		PharmGKB	17549067
KLC1	KLC1	Definite	KLC1	LEUCOVORIN		PharmGKB	17549067
KLC1	KLC1	Definite	KLC1	IRINOTECAN		PharmGKB	17549067
PRRC2A	PRRC2A	Definite	PRRC2A	CARBAMAZEPINE		PharmGKB	16538176
PRRC2A	PRRC2A	Definite	PRRC2A	CARBOPLATIN		PharmGKB	31616045
PRRC2A	PRRC2A	Definite	PRRC2A	GEMCITABINE		PharmGKB	31616045
COL11A2	COL11A2	Definite	COL11A2	COLLAGENASE CLOSTRIDIUM HISTOLYTICUM		ChemblInteractions
COL11A2	COL11A2	Definite	COL11A2	OCRIPLASMIN		ChemblInteractions
HCG22	HCG22	Definite	HCG22	TRIAMCINOLONE		PharmGKB
KIAA0391	PRORP	Definite	PRORP	ZILEUTON		PharmGKB	25963335
