# Supplementary material for: A conditional gene-based association framework integrating isoform-level eQTL data reveals new susceptibility genes for schizophrenia
Source: eLife. 2022 Apr 12;11:e70779. doi: 10.7554/eLife.70779 (PMC9005191; doi:10.7554/eLife.70779)
Supplement: Table 6—source data 3. [file elife-70779-table6-data3.xlsx]

## Sheet: eDESE_dist
The drug-gene interaction term results of the potential susceptibility genes of schizophrenia identified by eDESE:dist in DGIdb.
search_term	match_term	match_type	gene	drug	interaction_types	sources	pmids
OPRD1	OPRD1	Definite	OPRD1	DIHYDROMORPHINE	agonist	GuideToPharmacology	16777416|15178355|19474215
OPRD1	OPRD1	Definite	OPRD1	HYDROMORPHONE	agonist|partial agonist	TdgClinicalTrial|TEND|GuideToPharmacology|TTD	17658959|9301669|11752352|2849950|2478994|7511163
OPRD1	OPRD1	Definite	OPRD1	CHEMBL409225		DTC	21978284
OPRD1	OPRD1	Definite	OPRD1	CODEINE	agonist	TdgClinicalTrial|TEND|TTD	8119316|7885194|12067475|16386786|2156065|12420793|11752352
OPRD1	OPRD1	Definite	OPRD1	NALOXONE HYDROCHLORIDE	antagonist	ChemblInteractions
OPRD1	OPRD1	Definite	OPRD1	NALTREXONE	antagonist	TdgClinicalTrial|ChemblInteractions|TEND|GuideToPharmacology|PharmGKB	17487229|22954510|9040115|11752352|17661275|9673788|15788780
OPRD1	OPRD1	Definite	OPRD1	ENDOMORPHIN-1	agonist	GuideToPharmacology
OPRD1	OPRD1	Definite	OPRD1	MORPHINE	agonist	TdgClinicalTrial|TEND|GuideToPharmacology	16539674|16650582|12015197|16530171|16534251|16678156|11752352
OPRD1	OPRD1	Definite	OPRD1	DADLE	agonist	GuideToPharmacology
OPRD1	OPRD1	Definite	OPRD1	AXOMADOL	agonist	ChemblInteractions
OPRD1	OPRD1	Definite	OPRD1	SAMIDORPHAN	antagonist	GuideToPharmacology
OPRD1	OPRD1	Definite	OPRD1	MEPERIDINE	agonist	GuideToPharmacology
OPRD1	OPRD1	Definite	OPRD1	BENZHYDROCODONE HYDROCHLORIDE		TdgClinicalTrial
OPRD1	OPRD1	Definite	OPRD1	DIPRENORPHINE	antagonist|agonist	GuideToPharmacology	11526449|12909189|10413036|20641600|12672796|10319982
OPRD1	OPRD1	Definite	OPRD1	BNTX	antagonist	GuideToPharmacology
OPRD1	OPRD1	Definite	OPRD1	CEBRANOPADOL	agonist	ChemblInteractions|GuideToPharmacology
OPRD1	OPRD1	Definite	OPRD1	HYDROCODONE	agonist	TdgClinicalTrial|TEND	14600248|31170174|16291875|11752352
OPRD1	OPRD1	Definite	OPRD1	SNC-80		DTC	19646882
OPRD1	OPRD1	Definite	OPRD1	OXYMORPHONE HYDROCHLORIDE	agonist	ChemblInteractions
OPRD1	OPRD1	Definite	OPRD1	PROPOXYPHENE	agonist	TdgClinicalTrial|TEND	6151117
OPRD1	OPRD1	Definite	OPRD1	ODELEPRAN	antagonist	ChemblInteractions
OPRD1	OPRD1	Definite	OPRD1	ETORPHINE	agonist	GuideToPharmacology	12606694|1665782|12672796|7739347|11752352|10999950|1316589
OPRD1	OPRD1	Definite	OPRD1	COCAINE		PharmGKB
OPRD1	OPRD1	Definite	OPRD1	METHADONE	agonist	PharmGKB	12405865|19843777|31907389
OPRD1	OPRD1	Definite	OPRD1	LOPERAMIDE	agonist	TTD	18284554|11752352|6319884
OPRD1	OPRD1	Definite	OPRD1	NALMEFENE HYDROCHLORIDE	antagonist	ChemblInteractions
OPRD1	OPRD1	Definite	OPRD1	CARFENTANIL	agonist	TTD	1656846|15853689
OPRD1	OPRD1	Definite	OPRD1	NALBUPHINE	agonist|antagonist	TdgClinicalTrial|TEND|GuideToPharmacology	2826773|11752352|8093631
OPRD1	OPRD1	Definite	OPRD1	CODEINE PHOSPHATE	agonist	ChemblInteractions
OPRD1	OPRD1	Definite	OPRD1	ELUXADOLINE	antagonist	DTC|TTD	25261794|22695132
OPRD1	OPRD1	Definite	OPRD1	CHEMBL13786		TTD
OPRD1	OPRD1	Definite	OPRD1	ADL-5747	agonist	TdgClinicalTrial|GuideToPharmacology
OPRD1	OPRD1	Definite	OPRD1	NALMEFENE	antagonist|agonist	TdgClinicalTrial|GuideToPharmacology	25187751|15956985
OPRD1	OPRD1	Definite	OPRD1	FENTANYL	agonist	TdgClinicalTrial|TEND|GuideToPharmacology|PharmGKB	15665994|16372825|15868528|30549211|19403616|16861092|15828941
OPRD1	OPRD1	Definite	OPRD1	BUPRENORPHINE	antagonist	TdgClinicalTrial|PharmGKB	23612435|30368523|16169027|16443205|24126707|30549211|19666890
OPRD1	OPRD1	Definite	OPRD1	BUTORPHANOL	agonist	TdgClinicalTrial|TEND|TTD	15942128|12470863|8746803|12127012|7705457|17909753|11752352|8968334
OPRD1	OPRD1	Definite	OPRD1	NALDEMEDINE	antagonist	GuideToPharmacology
OPRD1	OPRD1	Definite	OPRD1	CODEINE SULFATE	agonist	ChemblInteractions
OPRD1	OPRD1	Definite	OPRD1	ETHYLKETOCYCLAZOCINE	agonist	GuideToPharmacology
OPRD1	OPRD1	Definite	OPRD1	NALOXONE	antagonist	DTC|TdgClinicalTrial|TEND|GuideToPharmacology	18354714|14708857|14646257|12657847|12749773|17367258|24613457|12650833
OPRD1	OPRD1	Definite	OPRD1	NORBINALTORPHIMINE	antagonist	GuideToPharmacology
OPRD1	OPRD1	Definite	OPRD1	TRAMADOL	agonist	GuideToPharmacology|PharmGKB	19027293|30549211|31004280
OPRD1	OPRD1	Definite	OPRD1	HYDROCODONE BITARTRATE	agonist	ChemblInteractions
OPRD1	OPRD1	Definite	OPRD1	ADL-5747		TTD
OPRD1	OPRD1	Definite	OPRD1	QUADAZOCINE	antagonist	GuideToPharmacology
OPRD1	OPRD1	Definite	OPRD1	OXYCODONE	agonist	TdgClinicalTrial|TEND|PharmGKB|TTD	11752352|17525040
OPRD1	OPRD1	Definite	OPRD1	CHEMBL300662		TTD
OPRD1	OPRD1	Definite	OPRD1	OXYCODEGOL	agonist	GuideToPharmacology
OPRD1	OPRD1	Definite	OPRD1	ALVIMOPAN	antagonist	GuideToPharmacology	15882122|17340127
OPRD1	OPRD1	Definite	OPRD1	CHEMBL442577	agonist	GuideToPharmacology
OPRD1	OPRD1	Definite	OPRD1	DPDPE	agonist	GuideToPharmacology
OPRD1	OPRD1	Definite	OPRD1	ETONITAZENE	agonist	GuideToPharmacology
OPRD1	OPRD1	Definite	OPRD1	HYDROCODONE POLISTIREX	agonist	ChemblInteractions
OPRD1	OPRD1	Definite	OPRD1	OXYMORPHONE	antagonist	TdgClinicalTrial	14998329|17595308
OPRD1	OPRD1	Definite	OPRD1	NORMORPHINE	agonist	GuideToPharmacology
OPRD1	OPRD1	Definite	OPRD1	NALTRIBEN	antagonist	GuideToPharmacology
OPRD1	OPRD1	Definite	OPRD1	CODEINE POLISTIREX	agonist	ChemblInteractions
OPRD1	OPRD1	Definite	OPRD1	NALORPHINE	agonist	GuideToPharmacology
OPRD1	OPRD1	Definite	OPRD1	METHYLNALTREXONE	antagonist	GuideToPharmacology
OPRD1	OPRD1	Definite	OPRD1	NALTRINDOLE	antagonist	GuideToPharmacology
OPRD1	OPRD1	Definite	OPRD1	NALBUPHINE HYDROCHLORIDE	agonist	ChemblInteractions
OPRD1	OPRD1	Definite	OPRD1	SUFENTANIL	agonist	TdgClinicalTrial	1330549|8612823
OPRD1	OPRD1	Definite	OPRD1	ATICAPRANT	antagonist	GuideToPharmacology
OPRD1	OPRD1	Definite	OPRD1	ZYKLOPHIN	antagonist	GuideToPharmacology
OPRD1	OPRD1	Definite	OPRD1	NALTREXONE HYDROCHLORIDE	antagonist	ChemblInteractions
PDE4B	PDE4B	Definite	PDE4B	DYPHYLLINE	inhibitor	TdgClinicalTrial|ChemblInteractions|TEND	7925603|17139284|17016423|225216
PDE4B	PDE4B	Definite	PDE4B	APREMILAST	antagonist|inhibitor	TdgClinicalTrial|ChemblInteractions|GuideToPharmacology	25864487|17352685
PDE4B	PDE4B	Definite	PDE4B	CRISABOROLE	inhibitor	TdgClinicalTrial|ChemblInteractions|GuideToPharmacology	22841723
PDE4B	PDE4B	Definite	PDE4B	THEOPHYLLINE	inhibitor	TdgClinicalTrial|ChemblInteractions|TEND	15639300
PDE4B	PDE4B	Definite	PDE4B	ALCOHOL		PharmGKB	32451486
PDE4B	PDE4B	Definite	PDE4B	FLAVOXATE HYDROCHLORIDE	inhibitor	ChemblInteractions
PDE4B	PDE4B	Definite	PDE4B	HT-0712		TTD
PDE4B	PDE4B	Definite	PDE4B	CHEMBL535714		DTC
PDE4B	PDE4B	Definite	PDE4B	LIRIMILAST		TTD
PDE4B	PDE4B	Definite	PDE4B	THEOPHYLLINE SODIUM GLYCINATE	inhibitor	ChemblInteractions
PDE4B	PDE4B	Definite	PDE4B	GSK-356278		TTD
PDE4B	PDE4B	Definite	PDE4B	CAFFEINE	inhibitor	TdgClinicalTrial|TEND	17139284|17016423|17514358
PDE4B	PDE4B	Definite	PDE4B	PAPAVERINE	inhibitor	TdgClinicalTrial|TEND	19231363|12646997|17139284|17016423
PDE4B	PDE4B	Definite	PDE4B	ROFLUMILAST	inhibitor	TdgClinicalTrial|ChemblInteractions|GuideToPharmacology	17726343
PDE4B	PDE4B	Definite	PDE4B	ROLIPRAM	inhibitor	GuideToPharmacology|TTD	10592235|17139284|17016423
PDE4B	PDE4B	Definite	PDE4B	TOFIMILAST		TTD
PDE4B	PDE4B	Definite	PDE4B	OGLEMILAST		TdgClinicalTrial|TTD	18660832
PDE4B	PDE4B	Definite	PDE4B	ENPROFYLLINE	inhibitor	TdgClinicalTrial|TEND	7680859|27472311|17139284|17016423
PDE4B	PDE4B	Definite	PDE4B	AMLEXANOX	inhibitor	ChemblInteractions
PDE4B	PDE4B	Definite	PDE4B	INAMRINONE	inhibitor	TdgClinicalTrial|TEND	17139284|17016423
PDE4B	PDE4B	Definite	PDE4B	DENBUFYLLINE		TTD
PDE4B	PDE4B	Definite	PDE4B	PICLAMILAST		TTD	10592235|15765929
PDE4B	PDE4B	Definite	PDE4B	MK-0873		TTD
PDE4B	PDE4B	Definite	PDE4B	PENTOXIFYLLINE	inhibitor	TdgClinicalTrial|ChemblInteractions|TEND	17139284|17016423
PDE4B	PDE4B	Definite	PDE4B	OXTRIPHYLLINE	inhibitor	ChemblInteractions
PDE4B	PDE4B	Definite	PDE4B	CDP840	inhibitor	GuideToPharmacology
PDE4B	PDE4B	Definite	PDE4B	DIPYRIDAMOLE	inhibitor	ChemblInteractions
PDE4B	PDE4B	Definite	PDE4B	CDC-801		TTD
PDE4B	PDE4B	Definite	PDE4B	IBUDILAST	inhibitor	TdgClinicalTrial|GuideToPharmacology	16313925
PDE4B	PDE4B	Definite	PDE4B	AMINOPHYLLINE	inhibitor	ChemblInteractions
PDE4B	PDE4B	Definite	PDE4B	RESVERATROL		TdgClinicalTrial
PDE4B	PDE4B	Definite	PDE4B	REVAMILAST		TTD
PDE4B	PDE4B	Definite	PDE4B	ETAZOLATE		TdgClinicalTrial
DPYD	DPYD	Definite	DPYD	CAPECITABINE		NCI|CGI|CIViC|FDA	16279094|23988873
DPYD	DPYD	Definite	DPYD	TEGAFUR		NCI|CGI|CIViC|PharmGKB	12209976|28950804|24923815|30858516|23603345|16115930|27122156|31382864|22490566|9470816|18600527|15944764|26603945|18443386|17700593|17165084|17000685|19530960|26794347|19795123|12360106|19473056|9439663|26099996|26216193|27864592|17121937|18299612|28295243|15132136|20819423|27995989|16151913|15017333|24817302|30114658|29846282|9323575|29134491|23988873|17203168|11895907|32378051|25677447|170648…
DPYD	DPYD	Definite	DPYD	FLUOROURACIL		NCI|CIViC|TTD|FDA	16421754|15330204|17179731|23988873|15538739|11501504|31871216
DPYD	DPYD	Definite	DPYD	IRINOTECAN		PharmGKB	28395759
DPYD	DPYD	Definite	DPYD	LEUCOVORIN		NCI|CIViC|PharmGKB	11977552|12576451|31871216
DPYD	DPYD	Definite	DPYD	FLUCYTOSINE		PharmGKB
DPYD	DPYD	Definite	DPYD	ENILURACIL		TdgClinicalTrial|TTD	16466986
DPYD	DPYD	Definite	DPYD	GIMERACIL	inhibitor	TdgClinicalTrial
DPYD	DPYD	Definite	DPYD	OXALIPLATIN		NCI	17127229
NRAS	NRAS	Definite	NRAS	SALIRASIB		TTD
NRAS	NRAS	Definite	NRAS	CETUXIMAB		JAX-CKB|CGI|CIViC|PharmGKB|OncoKB	24024839|28275037|23325582|25838391|20619739|26438111|27002107|28179366|25605843
NRAS	NRAS	Definite	NRAS	LONAFARNIB	inhibitor	GuideToPharmacology
NRAS	NRAS	Definite	NRAS	ALPELISIB		JAX-CKB	24569456
NRAS	NRAS	Definite	NRAS	EVEROLIMUS		JAX-CKB|CIViC	23629727|26821351
NRAS	NRAS	Definite	NRAS	MK-2206		JAX-CKB	21289267
NRAS	NRAS	Definite	NRAS	OMIPALISIB		JAX-CKB|CIViC	22389471|23431193
NRAS	NRAS	Definite	NRAS	PANITUMUMAB		JAX-CKB|CGI|CIViC|PharmGKB|OncoKB	24024839|28275037|23325582|26341920|20619739|26438111
NRAS	NRAS	Definite	NRAS	SELUMETINIB		JAX-CKB|CIViC|OncoKB	26343583|23515407|25870145|22392911|23406027
NRAS	NRAS	Definite	NRAS	BUPARLISIB		JAX-CKB	27307593
NRAS	NRAS	Definite	NRAS	ADAVOSERTIB		JAX-CKB	24791855
NRAS	NRAS	Definite	NRAS	TRAMETINIB		JAX-CKB|CIViC|PharmGKB	26343583|28783719|25504439|23515407|25452114|27760111|22805292|27488531|27500726|28514312|22389471|22983396|23431193|28179366
NRAS	NRAS	Definite	NRAS	CARBOPLATIN		PharmGKB	21636554
NRAS	NRAS	Definite	NRAS	BINIMETINIB		JAX-CKB|CIViC|OncoKB	24588908|28284557|27307593|23414587|29245078|28152546|11238126|24569456|26987942|28514312|26821351
NRAS	NRAS	Definite	NRAS	OBATOCLAX		JAX-CKB	22460902
NRAS	NRAS	Definite	NRAS	RIBOCICLIB		JAX-CKB|CIViC|OncoKB	26987942
NRAS	NRAS	Definite	NRAS	GEDATOLISIB		JAX-CKB	12068308|21325073
NRAS	NRAS	Definite	NRAS	ALTEPLASE		NCI	1394224
NRAS	NRAS	Definite	NRAS	PD-0325901		JAX-CKB	27488531
NRAS	NRAS	Definite	NRAS	VEMURAFENIB		JAX-CKB|CGI|CIViC|PharmGKB	26343583|21107323|24265153|26267534|27523909|23569304|22389471
NRAS	NRAS	Definite	NRAS	PLX-4720		JAX-CKB	25500121|23431193
NRAS	NRAS	Definite	NRAS	ABEMACICLIB		JAX-CKB	27217383
NRAS	NRAS	Definite	NRAS	E-6201		JAX-CKB	23039341
NRAS	NRAS	Definite	NRAS	INOSITOL		NCI	2498808
NRAS	NRAS	Definite	NRAS	CISPLATIN		PharmGKB	21636554
NRAS	NRAS	Definite	NRAS	COBIMETINIB		OncoKB
NRAS	NRAS	Definite	NRAS	PALBOCICLIB		JAX-CKB	27488531|22983396
NRAS	NRAS	Definite	NRAS	DEL-22379		JAX-CKB	26267534
NRAS	NRAS	Definite	NRAS	GEMCITABINE		PharmGKB	21636554
NRAS	NRAS	Definite	NRAS	PELAREOREP		TdgClinicalTrial
NRAS	NRAS	Definite	NRAS	AZD-5153		JAX-CKB	27573426
NRAS	NRAS	Definite	NRAS	LENVATINIB		JAX-CKB	26169970
NRAS	NRAS	Definite	NRAS	METFORMIN		CIViC	25504439
NRAS	NRAS	Definite	NRAS	LY-3009120		JAX-CKB	26343583
NRAS	NRAS	Definite	NRAS	PIMASERTIB		JAX-CKB	23629727
NRAS	NRAS	Definite	NRAS	PEMBROLIZUMAB		JAX-CKB	28514312
NRAS	NRAS	Definite	NRAS	GEFITINIB		JAX-CKB	25870145
NRAS	NRAS	Definite	NRAS	SORAFENIB		JAX-CKB|CGI	23629727
NRAS	NRAS	Definite	NRAS	REGORAFENIB		JAX-CKB	23629727|25838391
NRAS	NRAS	Definite	NRAS	DABRAFENIB		JAX-CKB|CIViC|PharmGKB	25452114|27523909|22389471
NRAS	NRAS	Definite	NRAS	XL-888		JAX-CKB	22351686
NRAS	NRAS	Definite	NRAS	AFATINIB		JAX-CKB	25870145
NRAS	NRAS	Definite	NRAS	LIFIRAFENIB		JAX-CKB
NRAS	NRAS	Definite	NRAS	TAK-733		JAX-CKB	26439693
NRAS	NRAS	Definite	NRAS	DACTOLISIB		CIViC	22392911
NRAS	NRAS	Definite	NRAS	DINACICLIB		JAX-CKB	26627013
NRAS	NRAS	Definite	NRAS	OSIMERTINIB		JAX-CKB	25870145
NRAS	NRAS	Definite	NRAS	IPILIMUMAB		CIViC	26095797
NGF	NGF	Definite	NGF	MEDI-578		TTD
NGF	NGF	Definite	NGF	TANEZUMAB	inhibitor	TdgClinicalTrial|ChemblInteractions|TTD
NGF	NGF	Definite	NGF	FASINUMAB	inhibitor	ChemblInteractions|TTD
NGF	NGF	Definite	NGF	METHADONE		PharmGKB	21358750|23651024
NGF	NGF	Definite	NGF	FULRANUMAB	inhibitor	ChemblInteractions
GALNT2	GALNT2	Definite	GALNT2	ATENOLOL		PharmGKB
AKT3	AKT3	Definite	AKT3	UPROSERTIB	inhibitor	ChemblInteractions|CGI|GuideToPharmacology|TTD
AKT3	AKT3	Definite	AKT3	OMIPALISIB	inhibitor	MyCancerGenomeClinicalTrial
AKT3	AKT3	Definite	AKT3	MK-2206	inhibitor|allosteric modulator	TdgClinicalTrial|ClearityFoundationClinicalTrial|ChemblInteractions|GuideToPharmacology|MyCancerGenomeClinicalTrial|TTD
AKT3	AKT3	Definite	AKT3	VEMURAFENIB		CIViC	24265155
AKT3	AKT3	Definite	AKT3	XL-418	inhibitor	TdgClinicalTrial|ChemblInteractions|TTD	19644473
AKT3	AKT3	Definite	AKT3	PERIFOSINE		TdgClinicalTrial
AKT3	AKT3	Definite	AKT3	GSK-690693	inhibitor	ChemblInteractions|GuideToPharmacology|TTD
AKT3	AKT3	Definite	AKT3	TRICIRIBINE PHOSPHATE	inhibitor	ChemblInteractions
AKT3	AKT3	Definite	AKT3	MSC-2363318A	inhibitor	ChemblInteractions|TTD
AKT3	AKT3	Definite	AKT3	IPATASERTIB	inhibitor	TdgClinicalTrial|ClearityFoundationClinicalTrial|ChemblInteractions|GuideToPharmacology|MyCancerGenomeClinicalTrial
AKT3	AKT3	Definite	AKT3	ARCHEXIN		TdgClinicalTrial
AKT3	AKT3	Definite	AKT3	SR-13668		TTD
AKT3	AKT3	Definite	AKT3	EVEROLIMUS	inhibitor	MyCancerGenomeClinicalTrial
AKT3	AKT3	Definite	AKT3	AFURESERTIB	inhibitor	ChemblInteractions|GuideToPharmacology|TTD
AKT3	AKT3	Definite	AKT3	CAPIVASERTIB	inhibitor	ClearityFoundationClinicalTrial|CGI|GuideToPharmacology|TTD
AKT3	AKT3	Definite	AKT3	AZD-5363	inhibitor	ChemblInteractions
AKT3	AKT3	Definite	AKT3	GSK-269962A		DTC
AKT3	AKT3	Definite	AKT3	TRICIRIBINE		TdgClinicalTrial|ClearityFoundationClinicalTrial
AKT3	AKT3	Definite	AKT3	A-443654	inhibitor	GuideToPharmacology
AKT3	AKT3	Definite	AKT3	MIRANSERTIB	allosteric modulator|inhibitor	ChemblInteractions|GuideToPharmacology
AKT3	AKT3	Definite	AKT3	LY-2780301	inhibitor	ChemblInteractions
AKT3	AKT3	Definite	AKT3	FASUDIL		DTC
AKT3	AKT3	Definite	AKT3	MK-2201	inhibitor	ChemblInteractions
EIF2AK2	EIF2AK2	Definite	EIF2AK2	BCG VACCINE		NCI	16301626
FAM178B	FAM178B	Definite	FAM178B	LITHIUM		PharmGKB	29121268
DPP4	DPP4	Definite	DPP4	VILDAGLIPTIN	inhibitor	TdgClinicalTrial|ChemblInteractions|GuideToPharmacology|TTD	8100523|15562200|19149538
DPP4	DPP4	Definite	DPP4	OMARIGLIPTIN	inhibitor	ChemblInteractions|GuideToPharmacology|TTD
DPP4	DPP4	Definite	DPP4	LINAGLIPTIN	inhibitor	ChemblInteractions|GuideToPharmacology|TTD	22149370
DPP4	DPP4	Definite	DPP4	SAXAGLIPTIN	inhibitor	TdgClinicalTrial|TEND|GuideToPharmacology|TTD	16033281
DPP4	DPP4	Definite	DPP4	ENALAPRIL		NCI	16678199
DPP4	DPP4	Definite	DPP4	BEGELOMAB	antibody|inhibitor	ChemblInteractions|GuideToPharmacology|TTD
DPP4	DPP4	Definite	DPP4	ALOGLIPTIN	inhibitor	TdgClinicalTrial|GuideToPharmacology|TTD
DPP4	DPP4	Definite	DPP4	DENAGLIPTIN		TTD
DPP4	DPP4	Definite	DPP4	EVOGLIPTIN		TTD
DPP4	DPP4	Definite	DPP4	BISEGLIPTIN		TdgClinicalTrial|TTD
DPP4	DPP4	Definite	DPP4	GOSOGLIPTIN	inhibitor	ChemblInteractions|TTD	21366665|10592235
DPP4	DPP4	Definite	DPP4	VALACYCLOVIR		DTC	24185376
DPP4	DPP4	Definite	DPP4	SITAGLIPTIN PHOSPHATE	inhibitor	ChemblInteractions
DPP4	DPP4	Definite	DPP4	GEMIGLIPTIN		TTD
DPP4	DPP4	Definite	DPP4	CARMEGLIPTIN	inhibitor	ChemblInteractions
DPP4	DPP4	Definite	DPP4	SITAGLIPTIN	inhibitor	TdgClinicalTrial|TEND|GuideToPharmacology|TTD	17315049|17352516|16490580|17407649|16855072|11752352|19065993|17593236|16868220|16682937|16338283|18182122
DPP4	DPP4	Definite	DPP4	SAXAGLIPTIN HYDROCHLORIDE	inhibitor	ChemblInteractions
DPP4	DPP4	Definite	DPP4	CAPTOPRIL		NCI	17531305
DPP4	DPP4	Definite	DPP4	TRELAGLIPTIN SUCCINATE	inhibitor	ChemblInteractions
DPP4	DPP4	Definite	DPP4	ANAGLIPTIN		TTD	19246581
DPP4	DPP4	Definite	DPP4	TRELAGLIPTIN		TTD
DPP4	DPP4	Definite	DPP4	TENELIGLIPTIN	inhibitor	GuideToPharmacology|TTD
DPP4	DPP4	Definite	DPP4	ALOGLIPTIN BENZOATE	inhibitor	ChemblInteractions
DPP4	DPP4	Definite	DPP4	TALABOSTAT	inhibitor	GuideToPharmacology
DPP4	DPP4	Definite	DPP4	DUTOGLIPTIN		TdgClinicalTrial|TTD
ZNF804A	ZNF804A	Definite	ZNF804A	LITHIUM		PharmGKB	29121268
ERBB4	ERBB4	Definite	ERBB4	PALIPERIDONE		PharmGKB	25714000
ERBB4	ERBB4	Definite	ERBB4	PELITINIB	inhibitor	TALC|MyCancerGenome
ERBB4	ERBB4	Definite	ERBB4	ERLOTINIB		DTC|JAX-CKB|PharmGKB	27207775
ERBB4	ERBB4	Definite	ERBB4	AC-480	inhibitor	TALC|MyCancerGenome|TdgClinicalTrial|ChemblInteractions|GuideToPharmacology
ERBB4	ERBB4	Definite	ERBB4	AFATINIB	inhibitor	JAX-CKB|CGI	27207775
ERBB4	ERBB4	Definite	ERBB4	LAPATINIB		DTC|JAX-CKB|CGI|DoCM|CIViC|PharmGKB	25590338|19718025
ERBB4	ERBB4	Definite	ERBB4	ILORASERTIB		DTC
ERBB4	ERBB4	Definite	ERBB4	CETUXIMAB		JAX-CKB	27207775
ERBB4	ERBB4	Definite	ERBB4	JNJ-26483327	inhibitor	ChemblInteractions
ERBB4	ERBB4	Definite	ERBB4	AZD-1152-HQPA		DTC
ERBB4	ERBB4	Definite	ERBB4	IBRUTINIB	inhibitor	GuideToPharmacology
ERBB4	ERBB4	Definite	ERBB4	DACOMITINIB	inhibitor	TALC|MyCancerGenome|TdgClinicalTrial|ChemblInteractions|GuideToPharmacology|MyCancerGenomeClinicalTrial
ERBB4	ERBB4	Definite	ERBB4	CURCUMIN		DTC	25753330
ERBB4	ERBB4	Definite	ERBB4	LAUROGUADINE		DTC
ERBB4	ERBB4	Definite	ERBB4	SP-600125		DTC
ERBB4	ERBB4	Definite	ERBB4	TUCATINIB	inhibitor	GuideToPharmacology
ERBB4	ERBB4	Definite	ERBB4	ALLITINIB	inhibitor	GuideToPharmacology
ERBB4	ERBB4	Definite	ERBB4	GEFITINIB	inhibitor	DTC|MyCancerGenomeClinicalTrial|PharmGKB
ERBB4	ERBB4	Definite	ERBB4	METHYLCURCUMIN		DTC	25753330
ERBB4	ERBB4	Definite	ERBB4	R-406		DTC
ERBB4	ERBB4	Definite	ERBB4	DIMETHYLCURCUMIN		DTC	25753330
ERBB4	ERBB4	Definite	ERBB4	AEE-788	inhibitor	GuideToPharmacology
ERBB4	ERBB4	Definite	ERBB4	POZIOTINIB	inhibitor	ChemblInteractions|GuideToPharmacology|MyCancerGenomeClinicalTrial
ERBB4	ERBB4	Definite	ERBB4	SB-220025		DTC
ERBB4	ERBB4	Definite	ERBB4	BMS-690514	inhibitor	TALC|MyCancerGenome|ChemblInteractions
ERBB4	ERBB4	Definite	ERBB4	TAK-715		DTC
ERBB4	ERBB4	Definite	ERBB4	OSIMERTINIB MESYLATE	inhibitor	ChemblInteractions
ERBB4	ERBB4	Definite	ERBB4	AFATINIB DIMALEATE	inhibitor	ChemblInteractions
ERBB4	ERBB4	Definite	ERBB4	TAE-684		DTC
ERBB4	ERBB4	Definite	ERBB4	CENISERTIB		DTC
ERBB4	ERBB4	Definite	ERBB4	VANDETANIB	inhibitor	ChemblInteractions
ERBB4	ERBB4	Definite	ERBB4	DASATINIB		DTC
ERBB4	ERBB4	Definite	ERBB4	CHEMBL578061		DTC
ERBB4	ERBB4	Definite	ERBB4	CANERTINIB DIHYDROCHLORIDE	inhibitor	ChemblInteractions
ERBB4	ERBB4	Definite	ERBB4	RG-1530		DTC
ERBB4	ERBB4	Definite	ERBB4	ACALABRUTINIB	inhibitor	GuideToPharmacology
ERBB4	ERBB4	Definite	ERBB4	ALISERTIB		DTC
ERBB4	ERBB4	Definite	ERBB4	CEDIRANIB		DTC
KCNJ13	KCNJ13	Definite	KCNJ13	DALFAMPRIDINE	blocker	GuideToPharmacology
NEK4	NEK4	Definite	NEK4	R-406		DTC
NEK4	NEK4	Definite	NEK4	DOVITINIB		DTC
NEK4	NEK4	Definite	NEK4	CHEMBL541400		DTC
NEK4	NEK4	Definite	NEK4	GW441756X		DTC
NEK4	NEK4	Definite	NEK4	TAE-684		DTC
NEK4	NEK4	Definite	NEK4	SNS-314		DTC
NEK4	NEK4	Definite	NEK4	CENISERTIB		DTC
NEK4	NEK4	Definite	NEK4	CYC-116		DTC
NEK4	NEK4	Definite	NEK4	CHEMBL225519		DTC
NEK4	NEK4	Definite	NEK4	SP-600125		DTC
NEK4	NEK4	Definite	NEK4	ILORASERTIB		DTC
ITIH3	ITIH3	Definite	ITIH3	CLOZAPINE		PharmGKB	27396837
FHIT	FHIT	Definite	FHIT	FRUCTOSE		TTD	17139284|17016423
SLC39A8	SLC39A8	Definite	SLC39A8	ALCOHOL		PharmGKB	32451486
HCN1	HCN1	Definite	HCN1	TRAMADOL		PharmGKB	30971809
HCN1	HCN1	Definite	HCN1	ZATEBRADINE	blocker	GuideToPharmacology
HCN1	HCN1	Definite	HCN1	IVABRADINE	blocker	GuideToPharmacology
HCN1	HCN1	Definite	HCN1	CILOBRADINE	blocker	GuideToPharmacology
PLK2	PLK2	Definite	PLK2	ONVANSERTIB	inhibitor	GuideToPharmacology
PLK2	PLK2	Definite	PLK2	BI-2536	inhibitor	GuideToPharmacology
PLK2	PLK2	Definite	PLK2	WORTMANNIN		DTC	17135248
PDE4D	PDE4D	Definite	PDE4D	DIPYRIDAMOLE	inhibitor	ChemblInteractions
PDE4D	PDE4D	Definite	PDE4D	ROLIPRAM	inhibitor	GuideToPharmacology|TTD	10592235|17139284|17016423
PDE4D	PDE4D	Definite	PDE4D	LIRIMILAST		TTD
PDE4D	PDE4D	Definite	PDE4D	AMINOPHYLLINE	inhibitor	ChemblInteractions
PDE4D	PDE4D	Definite	PDE4D	CRISABOROLE	inhibitor	ChemblInteractions	22841723
PDE4D	PDE4D	Definite	PDE4D	ROFLUMILAST	inhibitor	ChemblInteractions	17726343|10592235
PDE4D	PDE4D	Definite	PDE4D	PAPAVERINE		TTD
PDE4D	PDE4D	Definite	PDE4D	HT-0712		TTD
PDE4D	PDE4D	Definite	PDE4D	DYPHYLLINE	inhibitor	TdgClinicalTrial|ChemblInteractions|TEND	7925603|17139284|17016423
PDE4D	PDE4D	Definite	PDE4D	REVAMILAST		TTD
PDE4D	PDE4D	Definite	PDE4D	THEOPHYLLINE SODIUM GLYCINATE	inhibitor	ChemblInteractions
PDE4D	PDE4D	Definite	PDE4D	DENBUFYLLINE		TTD
PDE4D	PDE4D	Definite	PDE4D	OGLEMILAST		TTD	18660832
PDE4D	PDE4D	Definite	PDE4D	DIFAMILAST	inhibitor	GuideToPharmacology
PDE4D	PDE4D	Definite	PDE4D	BPN-14770	allosteric modulator	GuideToPharmacology|TTD
PDE4D	PDE4D	Definite	PDE4D	PENTOXIFYLLINE	inhibitor	ChemblInteractions
PDE4D	PDE4D	Definite	PDE4D	CDC-801		TTD
PDE4D	PDE4D	Definite	PDE4D	PICLAMILAST		TTD	10592235|15765929
PDE4D	PDE4D	Definite	PDE4D	APREMILAST	inhibitor|antagonist	ChemblInteractions|GuideToPharmacology	25864487|17352685
PDE4D	PDE4D	Definite	PDE4D	OXTRIPHYLLINE	inhibitor	ChemblInteractions
PDE4D	PDE4D	Definite	PDE4D	RESVERATROL		TdgClinicalTrial
PDE4D	PDE4D	Definite	PDE4D	GSK-356278		TTD
PDE4D	PDE4D	Definite	PDE4D	MK-0873		TTD
PDE4D	PDE4D	Definite	PDE4D	TOFIMILAST		TTD
PDE4D	PDE4D	Definite	PDE4D	FLAVOXATE HYDROCHLORIDE	inhibitor	ChemblInteractions
PDE4D	PDE4D	Definite	PDE4D	QUETIAPINE		PharmGKB
PDE4D	PDE4D	Definite	PDE4D	ETAZOLATE		TdgClinicalTrial
PDE4D	PDE4D	Definite	PDE4D	AMLEXANOX	inhibitor	ChemblInteractions
PDE4D	PDE4D	Definite	PDE4D	THEOPHYLLINE	inhibitor	ChemblInteractions
PDE4D	PDE4D	Definite	PDE4D	CDP840	inhibitor	GuideToPharmacology
HSPA9	HSPA9	Definite	HSPA9	CHEMBL33859		NCI|TTD	11156371
MAD1L1	MAD1L1	Definite	MAD1L1	CARBOPLATIN		PharmGKB	23407047
MAD1L1	MAD1L1	Definite	MAD1L1	PACLITAXEL		PharmGKB	23407047
GRM3	GRM3	Definite	GRM3	LY2969822	agonist	ChemblInteractions
GRM3	GRM3	Definite	GRM3	LY404039	agonist	ChemblInteractions|TTD
GRM3	GRM3	Definite	GRM3	DIACETYLMORPHINE		PharmGKB
GRM3	GRM3	Definite	GRM3	EGLUMEGAD	agonist	GuideToPharmacology
GRM3	GRM3	Definite	GRM3	POMAGLUMETAD METHIONIL	agonist	ChemblInteractions
GRM3	GRM3	Definite	GRM3	DECOGLURANT	modulator	ChemblInteractions|TTD	23976856
GRM3	GRM3	Definite	GRM3	SPAGLUMIC ACID	agonist	GuideToPharmacology
GRM3	GRM3	Definite	GRM3	RISPERIDONE		PharmGKB	19451915
CLU	CLU	Definite	CLU	CUSTIRSEN SODIUM	inhibitor	TdgClinicalTrial|CancerCommons
CLU	CLU	Definite	CLU	CUSTIRSEN	antisense oligonucleotide	TALC
CLU	CLU	Definite	CLU	LUBIPROSTONE		TdgClinicalTrial
CACNB2	CACNB2	Definite	CACNB2	FELODIPINE	inhibitor	TdgClinicalTrial	10525060|17475903|11752352
CACNB2	CACNB2	Definite	CACNB2	GABAPENTIN	modulator	ChemblInteractions
CACNB2	CACNB2	Definite	CACNB2	BEPRIDIL HYDROCHLORIDE	blocker	ChemblInteractions
CACNB2	CACNB2	Definite	CACNB2	CELECOXIB		PharmGKB	22336956
CACNB2	CACNB2	Definite	CACNB2	ATAGABALIN	modulator	ChemblInteractions
CACNB2	CACNB2	Definite	CACNB2	VERAPAMIL	inhibitor	TdgClinicalTrial|TEND	19125880
CACNB2	CACNB2	Definite	CACNB2	IMAGABALIN	modulator	ChemblInteractions
CACNB2	CACNB2	Definite	CACNB2	GABAPENTIN ENACARBIL	modulator	ChemblInteractions
CACNB2	CACNB2	Definite	CACNB2	AMLODIPINE	inhibitor	TdgClinicalTrial	11752352
CACNB2	CACNB2	Definite	CACNB2	PREGABALIN	modulator	ChemblInteractions
PRKG1	PRKG1	Definite	PRKG1	GSK-269962A		DTC
PRKG1	PRKG1	Definite	PRKG1	GSK-690693	inhibitor	GuideToPharmacology
PRKG1	PRKG1	Definite	PRKG1	IPATASERTIB	inhibitor	GuideToPharmacology
PRKG1	PRKG1	Definite	PRKG1	SOTRASTAURIN		DTC
PRKG1	PRKG1	Definite	PRKG1	GW843682X		DTC
PRKG1	PRKG1	Definite	PRKG1	LINIFANIB		DTC
PRKG1	PRKG1	Definite	PRKG1	TAE-684		DTC
PRKG1	PRKG1	Definite	PRKG1	CENISERTIB		DTC
PRKG1	PRKG1	Definite	PRKG1	CHEMBL225519		DTC
CYP17A1	CYP17A1	Definite	CYP17A1	ORTERONEL	inhibitor	TdgClinicalTrial|ChemblInteractions|CancerCommons|TTD
CYP17A1	CYP17A1	Definite	CYP17A1	GALETERONE	inhibitor	TdgClinicalTrial|ChemblInteractions|GuideToPharmacology
CYP17A1	CYP17A1	Definite	CYP17A1	ABIRATERONE	inhibitor	TdgClinicalTrial|CGI|GuideToPharmacology|PharmGKB|TTD	20645691|25157341
CYP17A1	CYP17A1	Definite	CYP17A1	ABIRATERONE ACETATE	inhibitor	ChemblInteractions
CYP17A1	CYP17A1	Definite	CYP17A1	CFG-920		TTD
CYP17A1	CYP17A1	Definite	CYP17A1	ENZALUTAMIDE		CGI
CYP17A1	CYP17A1	Definite	CYP17A1	SEVITERONEL		TTD
CYP17A1	CYP17A1	Definite	CYP17A1	ZYTIGA	inhibitor	CancerCommons
ABCC8	ABCC8	Definite	ABCC8	GLIMEPIRIDE	blocker|inducer	TdgClinicalTrial|ChemblInteractions|TTD	8911984|8172912|8529521
ABCC8	ABCC8	Definite	ABCC8	CHLORPROPAMIDE	blocker|inhibitor	ChemblInteractions|GuideToPharmacology	18220763
ABCC8	ABCC8	Definite	ABCC8	GLYBURIDE	blocker	TdgClinicalTrial|ChemblInteractions|TTD	12213829|17015627|12213059|12031979|9990013|12107069|12145099
ABCC8	ABCC8	Definite	ABCC8	NATEGLINIDE	inhibitor|blocker	TdgClinicalTrial|ChemblInteractions	11716850|10773014|12604678|12196472|11728565|12764427
ABCC8	ABCC8	Definite	ABCC8	TOLBUTAMIDE	blocker|inhibitor	ChemblInteractions|TTD	18220763
ABCC8	ABCC8	Definite	ABCC8	GLIPIZIDE	inhibitor|blocker	ChemblInteractions	11484080|11574406|11078468|11078469|12475777
ABCC8	ABCC8	Definite	ABCC8	REPAGLINIDE	blocker|inhibitor	TdgClinicalTrial|ChemblInteractions|GuideToPharmacology|TTD	15219283|11716850|10773014|15380228|12196472|11728565
ABCC8	ABCC8	Definite	ABCC8	GLIQUIDONE	inhibitor	DTC	11484080|16359864|11574406|11078468|11078469|12475777
ABCC8	ABCC8	Definite	ABCC8	MITIGLINIDE	inhibitor	TdgClinicalTrial	11716850|17003348|17592198
ABCC8	ABCC8	Definite	ABCC8	TOLBUTAMIDE SODIUM, STERILE	blocker	ChemblInteractions
ABCC8	ABCC8	Definite	ABCC8	ACETOHEXAMIDE	blocker	ChemblInteractions|TTD
ABCC8	ABCC8	Definite	ABCC8	NAMINIDIL		ChemblInteractions
ABCC8	ABCC8	Definite	ABCC8	BERBERRUBINE		DTC	16359864
ABCC8	ABCC8	Definite	ABCC8	BERBERINE CHLORIDE		DTC	16359864
ABCC8	ABCC8	Definite	ABCC8	GLICLAZIDE	binder	TTD	11484080|11574406|11078468|11078469|12475777
ABCC8	ABCC8	Definite	ABCC8	TOLAZAMIDE	blocker	ChemblInteractions	8799949|10354277
ABCC8	ABCC8	Definite	ABCC8	SARAKALIM		ChemblInteractions
FOLH1	FOLH1	Definite	FOLH1	CAPROMAB	antibody	TdgClinicalTrial|TEND|GuideToPharmacology|TTD	11016653|9792131|15882479|11752352|9508077
FOLH1	FOLH1	Definite	FOLH1	TECHNETIUM TC-99M TROFOLASTAT CHLORIDE		TTD
FOLH1	FOLH1	Definite	FOLH1	MERCAPTOPURINE		PharmGKB	22838948
FOLH1	FOLH1	Definite	FOLH1	MIPSAGARGIN		TTD
FOLH1	FOLH1	Definite	FOLH1	MDX-070		ChemblInteractions
FOLH1	FOLH1	Definite	FOLH1	METHOTREXATE		NCI|PharmGKB	22838948|9816319
FOLH1	FOLH1	Definite	FOLH1	DOCETAXEL	inhibitor	ClearityFoundationClinicalTrial|CancerCommons
FOLH1	FOLH1	Definite	FOLH1	SURAMIN		NCI	10861758
FOLH1	FOLH1	Definite	FOLH1	MLN-2704		TTD
FOLH1	FOLH1	Definite	FOLH1	MLN-591RL		TTD
FOLH1	FOLH1	Definite	FOLH1	ANDROSTANOLONE		NCI	8753752
DRD2	DRD2	Definite	DRD2	ASENAPINE	antagonist	TdgClinicalTrial|TEND|GuideToPharmacology	21658377|18308814|21655346
DRD2	DRD2	Definite	DRD2	OLANZAPINE	agonist|antagonist	TdgClinicalTrial|ChemblInteractions|TEND|GuideToPharmacology|PharmGKB|TTD	22967772|9713903|20714340|15694263|14575800|28673279|23859574|18180754|16730699|11505224|17092971|17105675|17316700|18926547|16123753|11920858|991813|14610521|17848919|17067304|18086475|18579277|20375926|25563748|11752352|9858029|15830237|25032030|26872113|17767146|16513877|23851570|20194480|9918131|21095016
DRD2	DRD2	Definite	DRD2	ASENAPINE MALEATE	antagonist	ChemblInteractions
DRD2	DRD2	Definite	DRD2	CLOZAPINE	antagonist	DTC|TdgClinicalTrial|ChemblInteractions|NCI|TEND|GuideToPharmacology|PharmGKB	9713903|15781964|20714340|15694263|14575800|28673279|23859574|18180754|11505224|17105675|15286066|18926547|16123753|11920858|21421319|991813|14610521|12769622|18086475|18579277|20375926|11752352|9858029|15830237|26872113|17767146|16513877|16040180|23851570|20194480|9918131|12887421
DRD2	DRD2	Definite	DRD2	ROPINIROLE	agonist	TdgClinicalTrial|TEND|GuideToPharmacology|PharmGKB|TTD	19557097|10446316|18691132|10641988|18808942|11752352|17573046|1683559
DRD2	DRD2	Definite	DRD2	SERTINDOLE	antagonist	TdgClinicalTrial|TEND|GuideToPharmacology	16925508|19506838|11752352|18293356|20856607
DRD2	DRD2	Definite	DRD2	SULPIRIDE	antagonist	DTC|TdgClinicalTrial|TEND|GuideToPharmacology|TTD	22632094|7518029|12010185|11752352
DRD2	DRD2	Definite	DRD2	BIFEPRUNOX	partial agonist	TdgClinicalTrial|ChemblInteractions	17393144|17659474
DRD2	DRD2	Definite	DRD2	REMOXIPRIDE	antagonist	TdgClinicalTrial|TEND	8665533|11873706|11752352
DRD2	DRD2	Definite	DRD2	DAPIPRAZOLE		TTD
DRD2	DRD2	Definite	DRD2	LUMATEPERONE	partial agonist|antagonist	TdgClinicalTrial|ChemblInteractions|GuideToPharmacology	30596390
DRD2	DRD2	Definite	DRD2	ILOPERIDONE	antagonist	TdgClinicalTrial|ChemblInteractions|TEND|TTD	12861482|8997630
DRD2	DRD2	Definite	DRD2	CARPHENAZINE	antagonist	TdgClinicalTrial|TEND|TTD	4887393|4889058|11752352|4861216
DRD2	DRD2	Definite	DRD2	PERGOLIDE	agonist	TdgClinicalTrial|TEND|GuideToPharmacology|PharmGKB|TTD	16842172|2860228|18691132|3828803|1674528|10641988|18808942|11752352|10516878
DRD2	DRD2	Definite	DRD2	ARIPIPRAZOLE	antagonist|partial agonist|agonist	TdgClinicalTrial|ChemblInteractions|TEND|GuideToPharmacology|PharmGKB|TTD	9713903|15694263|28673279|16973280|11505224|17105675|9083792|18926547|16123753|11920858|991813|14610521|16925992|16981227|18583979|19158809|19900188|10327430|11752352|16366516|9858029|15830237|16513877|18687376|20194480|17501690|9918131|15567074|17087792|19582781|26346901
DRD2	DRD2	Definite	DRD2	MEPHENTERMINE		TTD
DRD2	DRD2	Definite	DRD2	PHENOXYBENZAMINE		TTD
DRD2	DRD2	Definite	DRD2	LEVODOPA	agonist	TdgClinicalTrial|TEND|PharmGKB|TTD	11978145|18549347|15824260|15710490|17553470|27779245|15728856|9633680
DRD2	DRD2	Definite	DRD2	METOCLOPRAMIDE	antagonist	TdgClinicalTrial|TEND|TTD	21585331|8230103|15835479|8981558|11752352|9876882|8730709|7745844
DRD2	DRD2	Definite	DRD2	PROCHLORPERAZINE	antagonist	TdgClinicalTrial|ChemblInteractions|TEND|GuideToPharmacology|PharmGKB|TTD	17044574|2527092|17169748|18955042|18534808|11752352|24360851|16677982
DRD2	DRD2	Definite	DRD2	FLUPENTIXOL	antagonist	DTC|GuideToPharmacology	6149133|8797192|21421319|1674528|11873706|7498321|17111172|11752352
DRD2	DRD2	Definite	DRD2	HALOPERIDOL	antagonist|inverse agonist	DTC|TdgClinicalTrial|ChemblInteractions|NCI|TEND|GuideToPharmacology|PharmGKB|TTD	15894081|15184239|19603545|15492764|18180754|27023437|16730699|15286066|10823405|18855532|17316700|18926547|18781856|17134027|12587665|11329406|21421319|1839129|19179847|19944883|1969501|18086475|7520908|10395223|18781857|15077009|11752352|17989061|15830237|17767146|18354387|9672901|19396436|12629531|15146457|19273465|19853839|10862524|12887421|19373123|20643630|16132064
DRD2	DRD2	Definite	DRD2	SUMANIROLE	agonist	GuideToPharmacology|TTD
DRD2	DRD2	Definite	DRD2	PEROSPIRONE	antagonist	GuideToPharmacology	9595296
DRD2	DRD2	Definite	DRD2	ROTIGOTINE	agonist	TdgClinicalTrial|ChemblInteractions|TEND|GuideToPharmacology	18691132
DRD2	DRD2	Definite	DRD2	CHLORPROMAZINE	antagonist	ChemblInteractions|GuideToPharmacology|PharmGKB|TTD	7908055|15694263|28673279|11505224|17105675|18926547|16867246|11873706|11103886|11752352|9858029|15830237|16513877|8524985|20194480|9918131|20643630
DRD2	DRD2	Definite	DRD2	QUETIAPINE	antagonist	DTC|TdgClinicalTrial|TEND|GuideToPharmacology|TTD	21421319|17848919|11132243|11873706|10839333|11752352
DRD2	DRD2	Definite	DRD2	AMPHETAMINE	binder	PharmGKB	1532675
DRD2	DRD2	Definite	DRD2	ACETOPHENAZINE	antagonist	TdgClinicalTrial|TEND|TTD	6147851|11873706|11752352|17139284|17016423
DRD2	DRD2	Definite	DRD2	ALCOHOL		NCI|PharmGKB	1839129|12749054|1969501|1979357|27447243|10490697|8033754|17989061|22798433|11054774|29236941
DRD2	DRD2	Definite	DRD2	ZIPRASIDONE HYDROCHLORIDE	antagonist	ChemblInteractions
DRD2	DRD2	Definite	DRD2	DIACETYLMORPHINE		PharmGKB
DRD2	DRD2	Definite	DRD2	PRAMIPEXOLE	agonist	TdgClinicalTrial|TEND|GuideToPharmacology|TTD	22023785|9617505|18691132|10641988|9638397|11752352
DRD2	DRD2	Definite	DRD2	AMISULPRIDE	antagonist	TdgClinicalTrial|TEND|GuideToPharmacology|PharmGKB|TTD	12404702|11873706|25679126|16696579
DRD2	DRD2	Definite	DRD2	ROXINDOLE	agonist|antagonist	GuideToPharmacology|TTD
DRD2	DRD2	Definite	DRD2	LOXAPINE	antagonist	TdgClinicalTrial|ChemblInteractions|TEND|GuideToPharmacology|TTD	9570468|8665533|9342550|8101879|11752352|6239298|15694653
DRD2	DRD2	Definite	DRD2	DOPAMINE	agonist	GuideToPharmacology|TTD	17301410|11752352
DRD2	DRD2	Definite	DRD2	LISURIDE	agonist	TdgClinicalTrial|TEND|GuideToPharmacology|TTD	18691132|11752352
DRD2	DRD2	Definite	DRD2	ANIRACETAM		TTD	11412837
DRD2	DRD2	Definite	DRD2	TRIFLUPROMAZINE	antagonist	TdgClinicalTrial|ChemblInteractions|TEND	239169|30137788|17139284|9081563|17016423
DRD2	DRD2	Definite	DRD2	DOMPERIDONE	antagonist	TdgClinicalTrial|TEND|GuideToPharmacology|TTD	15894081|18970411|12010185|11752352|1683559
DRD2	DRD2	Definite	DRD2	PERPHENAZINE	antagonist	TdgClinicalTrial|ChemblInteractions|TEND|GuideToPharmacology|TTD	2573104|7508675|11873706|11752352|15007534|7828655
DRD2	DRD2	Definite	DRD2	CARPHENAZINE MALEATE	antagonist	ChemblInteractions
DRD2	DRD2	Definite	DRD2	MOLINDONE	antagonist	TdgClinicalTrial|TEND|TTD	9342550|9577836|11752352|9353417|17016423
DRD2	DRD2	Definite	DRD2	MINAPRINE	agonist	TdgClinicalTrial|TEND	7862862|17139284|17016423
DRD2	DRD2	Definite	DRD2	COCAINE		PharmGKB
DRD2	DRD2	Definite	DRD2	FLUPHENAZINE DECANOATE	antagonist	ChemblInteractions
DRD2	DRD2	Definite	DRD2	BREXPIPRAZOLE	agonist|partial agonist	TdgClinicalTrial|ChemblInteractions|GuideToPharmacology|TTD	24947465
DRD2	DRD2	Definite	DRD2	ZIPRASIDONE	antagonist	TdgClinicalTrial|TEND|GuideToPharmacology|TTD	15726024|17848919|7562537|11873706|11752352|14728084
DRD2	DRD2	Definite	DRD2	METARAMINOL		TTD
DRD2	DRD2	Definite	DRD2	CARMOXIROLE		TTD
DRD2	DRD2	Definite	DRD2	APOMORPHINE	agonist	TdgClinicalTrial|TEND|GuideToPharmacology|TTD	11343576|15037665|10494453|18691132|11215397|10641988|11752352|11212866|11692072
DRD2	DRD2	Definite	DRD2	CABERGOLINE	agonist	TdgClinicalTrial|ChemblInteractions|TEND|GuideToPharmacology|PharmGKB|TTD	12721865|18303487|8951172|12008749|12464354|18808942|15341508|11436517|11752352
DRD2	DRD2	Definite	DRD2	THIETHYLPERAZINE	antagonist	TdgClinicalTrial|TEND|TTD	15469457|17139284|17016423
DRD2	DRD2	Definite	DRD2	VILAZODONE	agonist	GuideToPharmacology
DRD2	DRD2	Definite	DRD2	CARIPRAZINE	partial agonist|agonist	TdgClinicalTrial|GuideToPharmacology|TTD	23320989
DRD2	DRD2	Definite	DRD2	FLUPHENAZINE ENANTHATE	antagonist	ChemblInteractions
DRD2	DRD2	Definite	DRD2	ORDOPIDINE	modulator	ChemblInteractions
DRD2	DRD2	Definite	DRD2	LURASIDONE HYDROCHLORIDE	antagonist	ChemblInteractions
DRD2	DRD2	Definite	DRD2	QUINPIROLE	agonist	DTC|GuideToPharmacology	21536445|21388142|26164842|21999579|25969169
DRD2	DRD2	Definite	DRD2	METHYLPHENIDATE		PharmGKB	26810137
DRD2	DRD2	Definite	DRD2	PALIPERIDONE	antagonist	TdgClinicalTrial|ChemblInteractions|TEND	11132243|12211096|11752352|7524043|16119512|7531353|16513859
DRD2	DRD2	Definite	DRD2	PARDOPRUNOX	partial agonist	TdgClinicalTrial|ChemblInteractions|TTD
DRD2	DRD2	Definite	DRD2	TRIMIPRAMINE MALEATE	antagonist	ChemblInteractions
DRD2	DRD2	Definite	DRD2	TIAPRIDE	blocker	TTD	11520476
DRD2	DRD2	Definite	DRD2	BUSPIRONE	antagonist	TdgClinicalTrial|TEND	16214127|14522358|12781354|11421254|11224194
DRD2	DRD2	Definite	DRD2	FLUPHENAZINE	antagonist	TdgClinicalTrial|TEND|GuideToPharmacology	7508675|11873706|11752352|7828655
DRD2	DRD2	Definite	DRD2	ROPINIROLE HYDROCHLORIDE	agonist	ChemblInteractions
DRD2	DRD2	Definite	DRD2	PIMOZIDE	antagonist	TdgClinicalTrial|ChemblInteractions|TEND|GuideToPharmacology|TTD	8301582|7855217|8082693|11873706|10503726|11752352|2378927|12828573
DRD2	DRD2	Definite	DRD2	TRIFLUOPERAZINE	antagonist	TdgClinicalTrial|TEND|GuideToPharmacology	8102973|1676523|11873706|11752352|15695070|945467
DRD2	DRD2	Definite	DRD2	BEVANTOLOL		TTD
DRD2	DRD2	Definite	DRD2	NAPHAZOLINE		TTD
DRD2	DRD2	Definite	DRD2	ONC-201		TTD
DRD2	DRD2	Definite	DRD2	MELEVODOPA		TdgClinicalTrial
DRD2	DRD2	Definite	DRD2	STEPHOLIDINE		DTC	19744859
DRD2	DRD2	Definite	DRD2	RISPERIDONE	antagonist	DTC|TdgClinicalTrial|ChemblInteractions|TEND|GuideToPharmacology|PharmGKB|TTD	15184239|9713903|20714340|19603545|15694263|28673279|23859574|15492764|18180754|17059881|16730699|11505224|17105675|15286066|10823405|18855532|18926547|16123753|18781856|11920858|12587665|11329406|21421319|991813|14610521|1839129|11132243|19179847|19944883|1969501|18086475|18579277|10395223|20375926|18781857|15077009|11752352|17989061|9858029|15830237|25943458|26872113|17767146|15140279|16513877|…
DRD2	DRD2	Definite	DRD2	ABAPERIDONE		TTD
DRD2	DRD2	Definite	DRD2	PERGOLIDE MESYLATE	agonist	ChemblInteractions
DRD2	DRD2	Definite	DRD2	CHLORPROTHIXENE	antagonist	TdgClinicalTrial|ChemblInteractions|TEND|TTD	1830565|19091563|8101879|11752352
DRD2	DRD2	Definite	DRD2	MESORIDAZINE	antagonist	TdgClinicalTrial|TEND|GuideToPharmacology|TTD	15357957|11752352|16135699
DRD2	DRD2	Definite	DRD2	OCAPERIDONE		TTD	10592235
DRD2	DRD2	Definite	DRD2	ERGONOVINE		TTD
DRD2	DRD2	Definite	DRD2	THIORIDAZINE HYDROCHLORIDE	antagonist	ChemblInteractions
DRD2	DRD2	Definite	DRD2	APOMORPHINE HYDROCHLORIDE	agonist	ChemblInteractions
DRD2	DRD2	Definite	DRD2	ZUCLOPENTHIXOL	antagonist	TdgClinicalTrial|TEND|TTD	17535043|11752352|8748043|1822319
DRD2	DRD2	Definite	DRD2	PIPERACETAZINE		TTD
DRD2	DRD2	Definite	DRD2	LOXAPINE HYDROCHLORIDE	antagonist	ChemblInteractions
DRD2	DRD2	Definite	DRD2	PHENYLEPHRINE		TTD
DRD2	DRD2	Definite	DRD2	THIORIDAZINE	antagonist	TdgClinicalTrial|ChemblInteractions|TEND|TTD	7689973|9292626|1978482|16434058|1352051
DRD2	DRD2	Definite	DRD2	AMOXAPINE	antagonist	ChemblInteractions	1966571|11180191
DRD2	DRD2	Definite	DRD2	SARIZOTAN	partial agonist	TTD	14767715
DRD2	DRD2	Definite	DRD2	CARIPRAZINE HYDROCHLORIDE	modulator	ChemblInteractions
DRD2	DRD2	Definite	DRD2	PIPOTIAZINE	antagonist	GuideToPharmacology	15694263|2875894|16867246|11873706|11103886|11752352|20643630
DRD2	DRD2	Definite	DRD2	LURASIDONE	antagonist	TdgClinicalTrial|TEND	23545936
DRD2	DRD2	Definite	DRD2	FLUSPIRILENE	antagonist	TdgClinicalTrial|TEND|TTD	8935801|11752352|17139284|11842444|17016423
DRD2	DRD2	Definite	DRD2	THIETHYLPERAZINE MALATE	antagonist	ChemblInteractions
DRD2	DRD2	Definite	DRD2	METOCLOPRAMIDE HYDROCHLORIDE	antagonist	ChemblInteractions
DRD2	DRD2	Definite	DRD2	HALOPERIDOL LACTATE	inverse agonist	ChemblInteractions
DRD2	DRD2	Definite	DRD2	EPHEDRINE		TTD
DRD2	DRD2	Definite	DRD2	5-OH-DPAT		DTC	3783613
DRD2	DRD2	Definite	DRD2	PHENYLTOLOXAMINE		TTD
DRD2	DRD2	Definite	DRD2	METHADONE		PharmGKB	21902500|23651024|18687376|19373123|25556837
DRD2	DRD2	Definite	DRD2	THIOTHIXENE HYDROCHLORIDE	antagonist	ChemblInteractions
DRD2	DRD2	Definite	DRD2	NAFADOTRIDE	antagonist	GuideToPharmacology
DRD2	DRD2	Definite	DRD2	TERGURIDE	agonist|antagonist	GuideToPharmacology
DRD2	DRD2	Definite	DRD2	LEVOMEPROMAZINE	antagonist	ChemblInteractions|TTD	2870716|15701205|10592235
DRD2	DRD2	Definite	DRD2	PRAMIPEXOLE DIHYDROCHLORIDE	agonist	ChemblInteractions
DRD2	DRD2	Definite	DRD2	PRIDOPIDINE	modulator	TdgClinicalTrial|ChemblInteractions|TTD
DRD2	DRD2	Definite	DRD2	DROPERIDOL	antagonist	TdgClinicalTrial|ChemblInteractions|TEND|TTD	2527092|1549935|14633536|20358234
DRD2	DRD2	Definite	DRD2	PROCHLORPERAZINE EDISYLATE	antagonist	ChemblInteractions
DRD2	DRD2	Definite	DRD2	TOLAZOLINE		TTD
DRD2	DRD2	Definite	DRD2	BROMOCRIPTINE MESYLATE	agonist	ChemblInteractions
DRD2	DRD2	Definite	DRD2	MESORIDAZINE BESYLATE	antagonist	ChemblInteractions
DRD2	DRD2	Definite	DRD2	ETICLOPRIDE	antagonist	GuideToPharmacology
DRD2	DRD2	Definite	DRD2	APLINDORE FUMARATE	partial agonist	ChemblInteractions
DRD2	DRD2	Definite	DRD2	PIRIBEDIL	agonist	GuideToPharmacology	10728880
DRD2	DRD2	Definite	DRD2	PROCHLORPERAZINE MALEATE	antagonist	ChemblInteractions
DRD2	DRD2	Definite	DRD2	ITOPRIDE		TdgClinicalTrial	16495395|17300287
DRD2	DRD2	Definite	DRD2	BLONANSERIN	antagonist	GuideToPharmacology|TTD	20030420
DRD2	DRD2	Definite	DRD2	BENPERIDOL	antagonist	GuideToPharmacology
DRD2	DRD2	Definite	DRD2	PROPIOMAZINE	antagonist	TdgClinicalTrial|TEND	19110200|18471899|17139284|17016423|22507664
DRD2	DRD2	Definite	DRD2	PHENTOLAMINE		TTD
DRD2	DRD2	Definite	DRD2	E-FLUPENTIXOL		TdgClinicalTrial|TEND
DRD2	DRD2	Definite	DRD2	MORPHINE		NCI	11943831
DRD2	DRD2	Definite	DRD2	PERAZINE		TTD
DRD2	DRD2	Definite	DRD2	ETILEVODOPA		TdgClinicalTrial
DRD2	DRD2	Definite	DRD2	BROMOCRIPTINE	agonist	TdgClinicalTrial|TEND|GuideToPharmacology|TTD	18691132|11444429|10641988|10721819|12010185|11752352|12753422|10626749
DRD2	DRD2	Definite	DRD2	NICOTINE		PharmGKB	16123753|15203796
DRD2	DRD2	Definite	DRD2	PROMAZINE	antagonist	TdgClinicalTrial|TEND|GuideToPharmacology	19110200|18471899|17139284|17016423
DRD2	DRD2	Definite	DRD2	ERGOLOID MESYLATES	agonist	ChemblInteractions
DRD2	DRD2	Definite	DRD2	NEMONAPRIDE		PharmGKB|TTD	15184239|19603545|15694263|28673279|15492764|18180754|11505224|17105675|15286066|10823405|18855532|18926547|18781856|12587665|11329406|1839129|19179847|19944883|1969501|18086475|10395223|18781857|15077009|17989061|9858029|15830237|17767146|16513877|18354387|9672901|19396436|15146457|19273465|19853839|20194480|10862524|9918131|19373123
DRD2	DRD2	Definite	DRD2	BENZQUINAMIDE	agonist	GuideToPharmacology
DRD2	DRD2	Definite	DRD2	ZOTEPINE	antagonist	GuideToPharmacology	23427194
DRD2	DRD2	Definite	DRD2	ACETOPHENAZINE MALEATE	antagonist	ChemblInteractions
DRD2	DRD2	Definite	DRD2	RISPERDAL		TdgClinicalTrial
DRD2	DRD2	Definite	DRD2	THIOTHIXENE	antagonist	ChemblInteractions|TTD	15694263|3039860|16867246|11873706|11103886|11752352|20643630
DRD2	DRD2	Definite	DRD2	DOPEXAMINE		TTD
DRD2	DRD2	Definite	DRD2	OLANZAPINE PAMOATE	antagonist	ChemblInteractions
DRD2	DRD2	Definite	DRD2	DIHYDROERGOTAMINE		TTD
DRD2	DRD2	Definite	DRD2	TALIPEXOLE		TTD
DRD2	DRD2	Definite	DRD2	LITHIUM		NCI	8787189
DRD2	DRD2	Definite	DRD2	DENOPAMINE		TTD
DRD2	DRD2	Definite	DRD2	DEXPRAMIPEXOLE		TdgClinicalTrial
DRD2	DRD2	Definite	DRD2	BENZQUINAMIDE HYDROCHLORIDE	modulator	ChemblInteractions
DRD2	DRD2	Definite	DRD2	ZICRONAPINE		TTD
DRD2	DRD2	Definite	DRD2	RASAGILINE		PharmGKB	27190009
DRD2	DRD2	Definite	DRD2	QUINELORANE	agonist	GuideToPharmacology
DRD2	DRD2	Definite	DRD2	APLINDORE		TdgClinicalTrial
DRD2	DRD2	Definite	DRD2	BL-1020		TTD
DRD2	DRD2	Definite	DRD2	SARIZOTAN HYDROCHLORIDE	partial agonist	ChemblInteractions
DRD2	DRD2	Definite	DRD2	THIETHYLPERAZINE MALEATE	antagonist	ChemblInteractions
DRD2	DRD2	Definite	DRD2	METHAMPHETAMINE		TTD
DRD2	DRD2	Definite	DRD2	SUMATRIPTAN		PharmGKB	25096645
DRD2	DRD2	Definite	DRD2	LOXAPINE SUCCINATE	antagonist	ChemblInteractions
DRD2	DRD2	Definite	DRD2	FLUPHENAZINE HYDROCHLORIDE	antagonist	ChemblInteractions
DRD2	DRD2	Definite	DRD2	JNJ-37822681	antagonist	TdgClinicalTrial|TTD	22490380
DRD2	DRD2	Definite	DRD2	SERIDOPIDINE	modulator	ChemblInteractions
DRD2	DRD2	Definite	DRD2	TRIFLUPROMAZINE HYDROCHLORIDE	antagonist	ChemblInteractions
DRD2	DRD2	Definite	DRD2	MOLINDONE HYDROCHLORIDE	antagonist	ChemblInteractions
DRD2	DRD2	Definite	DRD2	UMESPIRONE		TTD
DRD2	DRD2	Definite	DRD2	ARIPIPRAZOLE LAUROXIL	partial agonist	ChemblInteractions
DRD2	DRD2	Definite	DRD2	HALOPERIDOL DECANOATE	inverse agonist	ChemblInteractions
DRD2	DRD2	Definite	DRD2	SB-773812	antagonist	ChemblInteractions
DRD2	DRD2	Definite	DRD2	DISULFIRAM		PharmGKB	23635803
DRD2	DRD2	Definite	DRD2	QUETIAPINE FUMARATE	antagonist	ChemblInteractions
DRD2	DRD2	Definite	DRD2	QUINAGOLIDE	agonist	TTD
DRD2	DRD2	Definite	DRD2	BUPROPION		PharmGKB	15184239|19603545|15492764|18180754|15286066|10823405|18855532|18926547|16123753|18781856|12587665|11329406|1839129|19179847|19944883|1969501|18086475|10395223|18781857|15077009|17989061|15830237|17767146|18354387|9672901|19396436|15146457|19273465|19853839|10862524|19373123
DRD2	DRD2	Definite	DRD2	TRIFLUOPERAZINE HYDROCHLORIDE	antagonist	ChemblInteractions
DRD2	DRD2	Definite	DRD2	ZIPRASIDONE MESYLATE	antagonist	ChemblInteractions
DRD2	DRD2	Definite	DRD2	DOCARPAMINE		TTD
DRD2	DRD2	Definite	DRD2	METHYLDOPA		TTD
DRD2	DRD2	Definite	DRD2	CHLORPROMAZINE HYDROCHLORIDE	antagonist	ChemblInteractions
DRD2	DRD2	Definite	DRD2	PROMAZINE HYDROCHLORIDE	antagonist	ChemblInteractions
DRD2	DRD2	Definite	DRD2	DIHYDREXIDINE		DTC	19744859
DRD2	DRD2	Definite	DRD2	PSEUDOEPHEDRINE		TTD
DRD2	DRD2	Definite	DRD2	RACLOPRIDE	antagonist	GuideToPharmacology	15010698
DRD2	DRD2	Definite	DRD2	BROMPERIDOL		PharmGKB	15694263|28673279|11505224|17105675|18926547|9858029|15830237|16513877|20194480|9918131
CACNA1C	CACNA1C	Definite	CACNA1C	VERAPAMIL	inhibitor|blocker	TdgClinicalTrial|TEND|GuideToPharmacology|PharmGKB	15880143|19125880|9846638|20031608|15286207
CACNA1C	CACNA1C	Definite	CACNA1C	NICARDIPINE	inhibitor	TdgClinicalTrial|TEND	11752352
CACNA1C	CACNA1C	Definite	CACNA1C	AMLODIPINE BESYLATE	blocker	ChemblInteractions
CACNA1C	CACNA1C	Definite	CACNA1C	ALCOHOL		PharmGKB	31634677|12970385
CACNA1C	CACNA1C	Definite	CACNA1C	ELPETRIGINE	blocker	ChemblInteractions
CACNA1C	CACNA1C	Definite	CACNA1C	BENIDIPINE	antagonist|blocker	GuideToPharmacology	16565579
CACNA1C	CACNA1C	Definite	CACNA1C	IMAGABALIN	modulator	ChemblInteractions
CACNA1C	CACNA1C	Definite	CACNA1C	ISRADIPINE	inhibitor|blocker	TdgClinicalTrial|ChemblInteractions|TEND|GuideToPharmacology	12135765|10766758|9607315
CACNA1C	CACNA1C	Definite	CACNA1C	CLEVIDIPINE	blocker	TdgClinicalTrial|ChemblInteractions	15492770
CACNA1C	CACNA1C	Definite	CACNA1C	NIFEDIPINE	inhibitor|blocker	ChemblInteractions	19029287|9846638|11752352
CACNA1C	CACNA1C	Definite	CACNA1C	FELODIPINE	blocker|inhibitor	TdgClinicalTrial|ChemblInteractions	10525060|17475903|11752352
CACNA1C	CACNA1C	Definite	CACNA1C	ATAGABALIN	modulator	ChemblInteractions
CACNA1C	CACNA1C	Definite	CACNA1C	NIMODIPINE	blocker|inhibitor	ChemblInteractions|PharmGKB	20661350|17705883|20335610|20334460|11752352|19205682|19844625|8731425
CACNA1C	CACNA1C	Definite	CACNA1C	RITODRINE		PharmGKB	28391406
CACNA1C	CACNA1C	Definite	CACNA1C	VERAPAMIL HYDROCHLORIDE	blocker	ChemblInteractions
CACNA1C	CACNA1C	Definite	CACNA1C	NISOLDIPINE	blocker|inhibitor	ChemblInteractions|GuideToPharmacology	7592963|9584217|9846638|11752352
CACNA1C	CACNA1C	Definite	CACNA1C	HALOPERIDOL		PharmGKB	27023437
CACNA1C	CACNA1C	Definite	CACNA1C	MIBEFRADIL	inhibitor|blocker	GuideToPharmacology	10665814|10372226|16306443|16899990
CACNA1C	CACNA1C	Definite	CACNA1C	IBUTILIDE	activator	TdgClinicalTrial|TEND	9257085|15926871|11752352
CACNA1C	CACNA1C	Definite	CACNA1C	AMLODIPINE	inhibitor	TdgClinicalTrial	27556947|11752352|16322774
CACNA1C	CACNA1C	Definite	CACNA1C	DILTIAZEM HYDROCHLORIDE	blocker	ChemblInteractions
CACNA1C	CACNA1C	Definite	CACNA1C	DILTIAZEM	blocker	GuideToPharmacology	10226758
CACNA1C	CACNA1C	Definite	CACNA1C	BEPRIDIL HYDROCHLORIDE	blocker	ChemblInteractions
CACNA1C	CACNA1C	Definite	CACNA1C	PREGABALIN	modulator	ChemblInteractions
CACNA1C	CACNA1C	Definite	CACNA1C	CITALOPRAM		PharmGKB	19388002
CACNA1C	CACNA1C	Definite	CACNA1C	ATENOLOL		PharmGKB	20031608
CACNA1C	CACNA1C	Definite	CACNA1C	GABAPENTIN ENACARBIL	modulator	ChemblInteractions
CACNA1C	CACNA1C	Definite	CACNA1C	DRONEDARONE HYDROCHLORIDE	blocker	ChemblInteractions
CACNA1C	CACNA1C	Definite	CACNA1C	CELECOXIB		PharmGKB	22336956
CACNA1C	CACNA1C	Definite	CACNA1C	NICARDIPINE HYDROCHLORIDE	blocker	ChemblInteractions
CACNA1C	CACNA1C	Definite	CACNA1C	GABAPENTIN	modulator	ChemblInteractions
CACNA1C	CACNA1C	Definite	CACNA1C	AZD1305	blocker	ChemblInteractions
CACNA1C	CACNA1C	Definite	CACNA1C	AMLODIPINE MALEATE	blocker	ChemblInteractions
CACNA1C	CACNA1C	Definite	CACNA1C	DILTIAZEM MALATE	blocker	ChemblInteractions
ATP2A2	ATP2A2	Definite	ATP2A2	GALLOPAMIL		TTD
ATP2A2	ATP2A2	Definite	ATP2A2	CELECOXIB		PharmGKB	22336956
ATP2A2	ATP2A2	Definite	ATP2A2	ISTAROXIME		TdgClinicalTrial	17239702
TRPC4	TRPC4	Definite	TRPC4	CLEMIZOLE	blocker	GuideToPharmacology
KLC1	KLC1	Definite	KLC1	FLUOROURACIL		PharmGKB	17549067
KLC1	KLC1	Definite	KLC1	LEUCOVORIN		PharmGKB	17549067
KLC1	KLC1	Definite	KLC1	IRINOTECAN		PharmGKB	17549067
PAK6	PAK6	Definite	PAK6	GSK-690693	inhibitor	GuideToPharmacology
PAK6	PAK6	Definite	PAK6	PF-03758309	inhibitor	GuideToPharmacology
CHRNA3	CHRNA3	Definite	CHRNA3	TC-6499	agonist	ChemblInteractions
CHRNA3	CHRNA3	Definite	CHRNA3	PENTOLINIUM TARTRATE	antagonist	ChemblInteractions
CHRNA3	CHRNA3	Definite	CHRNA3	HEXAMETHONIUM	blocker	GuideToPharmacology
CHRNA3	CHRNA3	Definite	CHRNA3	ALCOHOL		PharmGKB	23641218|19270242
CHRNA3	CHRNA3	Definite	CHRNA3	LARAZOTIDE ACETATE	partial agonist	ChemblInteractions
CHRNA3	CHRNA3	Definite	CHRNA3	MECAMYLAMINE HYDROCHLORIDE		ChemblInteractions
CHRNA3	CHRNA3	Definite	CHRNA3	VARENICLINE	agonist|partial agonist	TdgClinicalTrial|GuideToPharmacology	16766716
CHRNA3	CHRNA3	Definite	CHRNA3	CHEMBL448084		DTC	19027295
CHRNA3	CHRNA3	Definite	CHRNA3	NICOTINE	agonist	GuideToPharmacology|PharmGKB	19560048|11006350|20886544|24535486|31402126|20400469|20081230
CHRNA3	CHRNA3	Definite	CHRNA3	EPIBATIDINE	agonist	DTC	9454827|20337496
CHRNA3	CHRNA3	Definite	CHRNA3	CHEMBL490153	blocker	GuideToPharmacology
CHRNA3	CHRNA3	Definite	CHRNA3	CHEMBL466398		DTC	19027295
CHRNA3	CHRNA3	Definite	CHRNA3	ASM-024	antagonist	ChemblInteractions
CHRNA3	CHRNA3	Definite	CHRNA3	TRIMETHAPHAN CAMSYLATE	antagonist	ChemblInteractions
CHRNA3	CHRNA3	Definite	CHRNA3	COCAINE		PharmGKB	32152934
CHRNA3	CHRNA3	Definite	CHRNA3	MECAMYLAMINE	blocker	GuideToPharmacology
CHRNA3	CHRNA3	Definite	CHRNA3	PHANTASMIDINE		DTC	20337496
CHRNA3	CHRNA3	Definite	CHRNA3	CHEMBL2332279		DTC	23352509
CHRNA3	CHRNA3	Definite	CHRNA3	ATRACURIUM	antagonist	GuideToPharmacology
CHRNA3	CHRNA3	Definite	CHRNA3	COTININE		PharmGKB
CDK5R1	CDK5R1	Definite	CDK5R1	CHEMBL1406948		DTC
CDK5R1	CDK5R1	Definite	CDK5R1	CHEMBL261692		DTC
CDK5R1	CDK5R1	Definite	CDK5R1	CHEMBL1276446		DTC
CDK5R1	CDK5R1	Definite	CDK5R1	HAEMATOXYLIN		DTC
CDK5R1	CDK5R1	Definite	CDK5R1	CHEMBL300389		DTC
CDK5R1	CDK5R1	Definite	CDK5R1	PURPUROGALLIN		DTC
CDK5R1	CDK5R1	Definite	CDK5R1	CHEMBL322970		DTC
KCNG2	KCNG2	Definite	KCNG2	TEDISAMIL	blocker	ChemblInteractions
KCNG2	KCNG2	Definite	KCNG2	DALFAMPRIDINE	blocker	ChemblInteractions
KCNG2	KCNG2	Definite	KCNG2	NERISPIRDINE	blocker	ChemblInteractions
KCNG2	KCNG2	Definite	KCNG2	GUANIDINE HYDROCHLORIDE	blocker	ChemblInteractions
SLC32A1	SLC32A1	Definite	SLC32A1	VIGABATRIN	inhibitor	GuideToPharmacology
KCNS1	KCNS1	Definite	KCNS1	GUANIDINE HYDROCHLORIDE	blocker	ChemblInteractions
KCNS1	KCNS1	Definite	KCNS1	NERISPIRDINE	blocker	ChemblInteractions
KCNS1	KCNS1	Definite	KCNS1	TEDISAMIL	blocker	ChemblInteractions
KCNS1	KCNS1	Definite	KCNS1	DALFAMPRIDINE	blocker	ChemblInteractions
CACNA1I	CACNA1I	Definite	CACNA1I	MIBEFRADIL DIHYDROCHLORIDE	blocker	ChemblInteractions
CACNA1I	CACNA1I	Definite	CACNA1I	GABAPENTIN ENACARBIL	modulator	ChemblInteractions
CACNA1I	CACNA1I	Definite	CACNA1I	ABT-639	blocker	GuideToPharmacology
CACNA1I	CACNA1I	Definite	CACNA1I	PREGABALIN	modulator	ChemblInteractions
CACNA1I	CACNA1I	Definite	CACNA1I	PARAMETHADIONE	blocker|suppressor	TdgClinicalTrial|ChemblInteractions|TEND	28963561|17139284|17016423
CACNA1I	CACNA1I	Definite	CACNA1I	FLUNARIZINE	inhibitor	TdgClinicalTrial|TEND	19582593|11784784|17139284|17016423
CACNA1I	CACNA1I	Definite	CACNA1I	PIMOZIDE	blocker	GuideToPharmacology
CACNA1I	CACNA1I	Definite	CACNA1I	TRIMETHADIONE	blocker	ChemblInteractions
CACNA1I	CACNA1I	Definite	CACNA1I	MIBEFRADIL	inhibitor|blocker	GuideToPharmacology	9481612|9375939|16899990|15562257
CACNA1I	CACNA1I	Definite	CACNA1I	ZONISAMIDE	inhibitor	TdgClinicalTrial	19557119|20001433|17762320|19948168|15511691|14965331|20025128|20502722|14704463|18433351
CACNA1I	CACNA1I	Definite	CACNA1I	BEPRIDIL HYDROCHLORIDE	blocker	ChemblInteractions
CACNA1I	CACNA1I	Definite	CACNA1I	METHSUXIMIDE	blocker	ChemblInteractions
CACNA1I	CACNA1I	Definite	CACNA1I	ETHOSUXIMIDE	blocker	ChemblInteractions
CACNA1I	CACNA1I	Definite	CACNA1I	CELECOXIB		PharmGKB	22336956
CACNA1I	CACNA1I	Definite	CACNA1I	VERAPAMIL	inhibitor	TEND	17139284|17016423
CACNA1I	CACNA1I	Definite	CACNA1I	PHENSUXIMIDE	blocker	ChemblInteractions
CACNA1I	CACNA1I	Definite	CACNA1I	ATAGABALIN	modulator	ChemblInteractions
CACNA1I	CACNA1I	Definite	CACNA1I	IMAGABALIN	modulator	ChemblInteractions
CACNA1I	CACNA1I	Definite	CACNA1I	ANANDAMIDE	blocker	GuideToPharmacology
CACNA1I	CACNA1I	Definite	CACNA1I	GABAPENTIN	modulator	ChemblInteractions
