# Supplementary material for: A conditional gene-based association framework integrating isoform-level eQTL data reveals new susceptibility genes for schizophrenia
Source: eLife. 2022 Apr 12;11:e70779. doi: 10.7554/eLife.70779 (PMC9005191; doi:10.7554/eLife.70779)
Supplement: Table 6—source data 4. [file elife-70779-table6-data4.xlsx]

## Sheet: eDESE_gene
The drug-gene interaction term results of the potential susceptibility genes of schizophrenia identified by eDESE:gene in DGIdb.
search_term	match_term	match_type	gene	drug	interaction_types	sources	pmids
CACNA1S	CACNA1S	Definite	CACNA1S	ISRADIPINE	blocker|inhibitor	ChemblInteractions	16675661
CACNA1S	CACNA1S	Definite	CACNA1S	NIMODIPINE	inhibitor|blocker	ChemblInteractions|GuideToPharmacology	20661350|17705883|16675661|20335610|20334460|19844625
CACNA1S	CACNA1S	Definite	CACNA1S	AMLODIPINE	inhibitor	TdgClinicalTrial	16675661
CACNA1S	CACNA1S	Definite	CACNA1S	NIFEDIPINE	inhibitor|blocker	ChemblInteractions	16675661
CACNA1S	CACNA1S	Definite	CACNA1S	AMLODIPINE MALEATE	blocker	ChemblInteractions
CACNA1S	CACNA1S	Definite	CACNA1S	CLEVIDIPINE	blocker	TdgClinicalTrial|ChemblInteractions	15492770
CACNA1S	CACNA1S	Definite	CACNA1S	ATAGABALIN	modulator	ChemblInteractions
CACNA1S	CACNA1S	Definite	CACNA1S	DILTIAZEM	blocker	GuideToPharmacology
CACNA1S	CACNA1S	Definite	CACNA1S	AZD1305	blocker	ChemblInteractions
CACNA1S	CACNA1S	Definite	CACNA1S	VERAPAMIL	inhibitor|blocker	TdgClinicalTrial|TEND|GuideToPharmacology	19125880
CACNA1S	CACNA1S	Definite	CACNA1S	ENFLURANE		PharmGKB	16163667|12411788|15201141|11260227
CACNA1S	CACNA1S	Definite	CACNA1S	ISOFLURANE		PharmGKB	16163667|12411788|15201141|11260227
CACNA1S	CACNA1S	Definite	CACNA1S	GABAPENTIN ENACARBIL	modulator	ChemblInteractions
CACNA1S	CACNA1S	Definite	CACNA1S	NICARDIPINE HYDROCHLORIDE	blocker	ChemblInteractions
CACNA1S	CACNA1S	Definite	CACNA1S	ELPETRIGINE	blocker	ChemblInteractions
CACNA1S	CACNA1S	Definite	CACNA1S	AMLODIPINE BESYLATE	blocker	ChemblInteractions
CACNA1S	CACNA1S	Definite	CACNA1S	FELODIPINE	inhibitor|blocker	TdgClinicalTrial|ChemblInteractions	16675661
CACNA1S	CACNA1S	Definite	CACNA1S	IMAGABALIN	modulator	ChemblInteractions
CACNA1S	CACNA1S	Definite	CACNA1S	DRONEDARONE HYDROCHLORIDE	blocker	ChemblInteractions
CACNA1S	CACNA1S	Definite	CACNA1S	SEVOFLURANE		PharmGKB	16163667|12411788|15201141|11260227
CACNA1S	CACNA1S	Definite	CACNA1S	HALOTHANE		PharmGKB	16163667|12411788|15201141|11260227
CACNA1S	CACNA1S	Definite	CACNA1S	DILTIAZEM HYDROCHLORIDE	blocker	ChemblInteractions
CACNA1S	CACNA1S	Definite	CACNA1S	PREGABALIN	modulator	ChemblInteractions
CACNA1S	CACNA1S	Definite	CACNA1S	METHOXYFLURANE		PharmGKB	16163667|12411788|15201141|11260227
CACNA1S	CACNA1S	Definite	CACNA1S	GABAPENTIN	modulator	ChemblInteractions
CACNA1S	CACNA1S	Definite	CACNA1S	DESFLURANE		PharmGKB	16163667|12411788|15201141|11260227
CACNA1S	CACNA1S	Definite	CACNA1S	CELECOXIB		PharmGKB	22336956
CACNA1S	CACNA1S	Definite	CACNA1S	SUXAMETHONIUM		PharmGKB	16163667|12411788|15201141|11260227
CACNA1S	CACNA1S	Definite	CACNA1S	BEPRIDIL HYDROCHLORIDE	blocker	ChemblInteractions
CACNA1S	CACNA1S	Definite	CACNA1S	NISOLDIPINE	inhibitor|blocker	ChemblInteractions	16675661
CACNA1S	CACNA1S	Definite	CACNA1S	DILTIAZEM MALATE	blocker	ChemblInteractions
CACNA1S	CACNA1S	Definite	CACNA1S	VERAPAMIL HYDROCHLORIDE	blocker	ChemblInteractions
CTNNBL1	CTNNBL1	Definite	CTNNBL1	ACETYLDIGOXIN		TTD
CTNNBL1	CTNNBL1	Definite	CTNNBL1	CHEMBL112750		TTD
KCNJ3	KCNJ3	Definite	KCNJ3	CLOZAPINE		NCI	10780978
KCNJ3	KCNJ3	Definite	KCNJ3	FLUPIRTINE		TdgClinicalTrial
KCNJ3	KCNJ3	Definite	KCNJ3	THYROTROPIN		NCI	10075694
UQCR10	UQCR10	Definite	UQCR10	FAMOXADONE		DTC	10843216|10592235
PPP3CA	PPP3CA	Definite	PPP3CA	VOCLOSPORIN		TdgClinicalTrial|TTD
PPP3CA	PPP3CA	Definite	PPP3CA	TACROLIMUS		TTD
PPP3CA	PPP3CA	Definite	PPP3CA	CYCLOSPORINE		TTD
PPP3CA	PPP3CA	Definite	PPP3CA	PIMECROLIMUS		TTD
CHRNA2	CHRNA2	Definite	CHRNA2	GANTACURIUM		TdgClinicalTrial
CHRNA2	CHRNA2	Definite	CHRNA2	CP-601927	agonist	GuideToPharmacology
CHRNA2	CHRNA2	Definite	CHRNA2	CARBACHOL	agonist	TdgClinicalTrial|TEND|TTD	20498043|11752352|17139284|17016423
CHRNA2	CHRNA2	Definite	CHRNA2	ROCURONIUM	antagonist	TdgClinicalTrial|TEND|TTD	19417616|11752352|17139284|16931985|17016423|18633030
CHRNA2	CHRNA2	Definite	CHRNA2	HEXAMETHONIUM	antagonist|blocker	GuideToPharmacology	12183644|8232788
CHRNA2	CHRNA2	Definite	CHRNA2	PIPECURONIUM	antagonist	TdgClinicalTrial|TEND|TTD	12426786|1748153|11752352|9227834|17016423
CHRNA2	CHRNA2	Definite	CHRNA2	DOXACURIUM	antagonist	TdgClinicalTrial|TEND	11752352|17139284|17016423|18633030
CHRNA2	CHRNA2	Definite	CHRNA2	TUBOCURARINE	antagonist	TdgClinicalTrial|TEND|TTD	11562442|20338223|19417616|11752352|17139284|17016423|18633030
CHRNA2	CHRNA2	Definite	CHRNA2	DECAMETHONIUM	partial agonist	TdgClinicalTrial|TEND	12067008|7848904|11752352|17139284|17016423
CHRNA2	CHRNA2	Definite	CHRNA2	CISATRACURIUM	antagonist	TTD	12171561|17139284|17016423
CHRNA2	CHRNA2	Definite	CHRNA2	MIVACURIUM	antagonist	TdgClinicalTrial|TEND|TTD	19417616|11752352|17139284|16931985|17016423|19352159
CHRNA2	CHRNA2	Definite	CHRNA2	BIPERIDEN	antagonist	TdgClinicalTrial|TEND	17139284|17016423
CHRNA2	CHRNA2	Definite	CHRNA2	MECAMYLAMINE	antagonist|blocker|inhibitor	TdgClinicalTrial|TEND|GuideToPharmacology	11752352|17139284|17016423|19778551|12080428
CHRNA2	CHRNA2	Definite	CHRNA2	PANCURONIUM	antagonist	TdgClinicalTrial|TEND	19417616|17016423|17525594
CHRNA2	CHRNA2	Definite	CHRNA2	NICOTINE	agonist	TdgClinicalTrial|TEND	19560048|11006350|20400469|20081230|15048644
CHRNA2	CHRNA2	Definite	CHRNA2	ATRACURIUM		TdgClinicalTrial|TEND
CHRNA2	CHRNA2	Definite	CHRNA2	VECURONIUM	antagonist	TTD	12145052|19417616|18633030
CHRNA2	CHRNA2	Definite	CHRNA2	METOCURINE	antagonist	TdgClinicalTrial|TEND	18842832|8132625|11752352|12799358|18633030
CHRNA2	CHRNA2	Definite	CHRNA2	LEVALLORPHAN		TTD
CHRNA2	CHRNA2	Definite	CHRNA2	CYTISINICLINE		TTD
PARP3	PARP3	Definite	PARP3	RUCAPARIB	inhibitor|antagonist	ChemblInteractions|PharmGKB
PARP3	PARP3	Definite	PARP3	VELIPARIB	inhibitor	ChemblInteractions
PARP3	PARP3	Definite	PARP3	OLAPARIB	inhibitor	ChemblInteractions	25981132
PARP3	PARP3	Definite	PARP3	RUCAPARIB CAMSYLATE	inhibitor	ChemblInteractions
PARP3	PARP3	Definite	PARP3	CHEMBL380648		DTC	19354255|10592235
NMUR2	NMUR2	Definite	NMUR2	N-METHYL SCOPOLAMINE	agonist	GuideToPharmacology
CPT1B	CPT1B	Definite	CPT1B	PERHEXILINE		TTD
CHEK1	CHEK1	Definite	CHEK1	SCH-900776	inhibitor	ChemblInteractions|GuideToPharmacology|TTD
CHEK1	CHEK1	Definite	CHEK1	DACTOLISIB		DTC
CHEK1	CHEK1	Definite	CHEK1	CYC-116		DTC
CHEK1	CHEK1	Definite	CHEK1	WITHAFERIN A		DTC	24079846
CHEK1	CHEK1	Definite	CHEK1	ISOGRANULATIMIDE	inhibitor	GuideToPharmacology
CHEK1	CHEK1	Definite	CHEK1	CISPLATIN		CIViC	28490518
CHEK1	CHEK1	Definite	CHEK1	UCN-01	inhibitor	ChemblInteractions|NCI|TTD	12244092
CHEK1	CHEK1	Definite	CHEK1	RG-1530		DTC
CHEK1	CHEK1	Definite	CHEK1	LY-2606368	inhibitor	ChemblInteractions
CHEK1	CHEK1	Definite	CHEK1	PREXASERTIB	inhibitor	ChemblInteractions|CIViC|GuideToPharmacology	28490518
CHEK1	CHEK1	Definite	CHEK1	AZD-7762	inhibitor	TALC|ChemblInteractions|GuideToPharmacology|TTD
CHEK1	CHEK1	Definite	CHEK1	RABUSERTIB	inhibitor	ChemblInteractions|GuideToPharmacology
CHEK1	CHEK1	Definite	CHEK1	ADRIAMYCIN		NCI	15707569
CHEK1	CHEK1	Definite	CHEK1	PALBOCICLIB		DTC
CHEK1	CHEK1	Definite	CHEK1	PF-00477736	inhibitor	ChemblInteractions|GuideToPharmacology
CHEK1	CHEK1	Definite	CHEK1	XL-844	inhibitor	ChemblInteractions
CHEK1	CHEK1	Definite	CHEK1	RG-7602	inhibitor	ChemblInteractions|TTD
CHEK1	CHEK1	Definite	CHEK1	GEMCITABINE		NCI	17245119
CHEK1	CHEK1	Definite	CHEK1	CHEMBL2203843	inhibitor	DTC|GuideToPharmacology	23082860
CHEK1	CHEK1	Definite	CHEK1	OLAPARIB		CIViC	28490518
CHEK1	CHEK1	Definite	CHEK1	R-406		DTC
CHEK1	CHEK1	Definite	CHEK1	DOVITINIB		DTC
CHEK1	CHEK1	Definite	CHEK1	CHEMBL1236539	inhibitor	GuideToPharmacology
CHEK1	CHEK1	Definite	CHEK1	CHEMBL578061		DTC
CHEK1	CHEK1	Definite	CHEK1	ETOPOSIDE		DTC	22364746
CHEK1	CHEK1	Definite	CHEK1	THYMIDINE		NCI	16280359
CHEK1	CHEK1	Definite	CHEK1	KENPAULLONE		DTC
CHEK1	CHEK1	Definite	CHEK1	DIMETHYLADENINE		DTC
CHEK1	CHEK1	Definite	CHEK1	CHEMBL506048		DTC	17978180
CHEK1	CHEK1	Definite	CHEK1	CI-1040		TTD
CHEK1	CHEK1	Definite	CHEK1	RG-7741	inhibitor	ChemblInteractions
CHEK1	CHEK1	Definite	CHEK1	TAE-684		DTC
CHEK1	CHEK1	Definite	CHEK1	SP-600125		DTC
CHEK1	CHEK1	Definite	CHEK1	CENISERTIB		DTC
CHEK1	CHEK1	Definite	CHEK1	BX-795	inhibitor	GuideToPharmacology
CHEK1	CHEK1	Definite	CHEK1	CHEMBL1997335		DTC
SV2A	SV2A	Definite	SV2A	BRIVARACETAM	other/unknown|modulator	TdgClinicalTrial|ChemblInteractions|TTD
SV2A	SV2A	Definite	SV2A	LEVETIRACETAM	agonist|modulator	TdgClinicalTrial|ChemblInteractions|TTD	18072813|15367040|16434140|16556440|17431542|15210974|17461889
SV2A	SV2A	Definite	SV2A	SELETRACETAM	modulator	TdgClinicalTrial	18183537|17199025
SV2A	SV2A	Definite	SV2A	INSULIN		NCI	16306227
ZNF804A	ZNF804A	Definite	ZNF804A	LITHIUM		PharmGKB	29121268
OPRD1	OPRD1	Definite	OPRD1	DIHYDROMORPHINE	agonist	GuideToPharmacology	16777416|15178355|19474215
OPRD1	OPRD1	Definite	OPRD1	HYDROMORPHONE	agonist|partial agonist	TdgClinicalTrial|TEND|GuideToPharmacology|TTD	17658959|9301669|11752352|2849950|2478994|7511163
OPRD1	OPRD1	Definite	OPRD1	CHEMBL409225		DTC	21978284
OPRD1	OPRD1	Definite	OPRD1	CODEINE	agonist	TdgClinicalTrial|TEND|TTD	8119316|7885194|12067475|16386786|2156065|12420793|11752352
OPRD1	OPRD1	Definite	OPRD1	NALOXONE HYDROCHLORIDE	antagonist	ChemblInteractions
OPRD1	OPRD1	Definite	OPRD1	NALTREXONE	antagonist	TdgClinicalTrial|ChemblInteractions|TEND|GuideToPharmacology|PharmGKB	17487229|22954510|9040115|11752352|17661275|9673788|15788780
OPRD1	OPRD1	Definite	OPRD1	ENDOMORPHIN-1	agonist	GuideToPharmacology
OPRD1	OPRD1	Definite	OPRD1	MORPHINE	agonist	TdgClinicalTrial|TEND|GuideToPharmacology	16539674|16650582|12015197|16530171|16534251|16678156|11752352
OPRD1	OPRD1	Definite	OPRD1	DADLE	agonist	GuideToPharmacology
OPRD1	OPRD1	Definite	OPRD1	AXOMADOL	agonist	ChemblInteractions
OPRD1	OPRD1	Definite	OPRD1	SAMIDORPHAN	antagonist	GuideToPharmacology
OPRD1	OPRD1	Definite	OPRD1	MEPERIDINE	agonist	GuideToPharmacology
OPRD1	OPRD1	Definite	OPRD1	BENZHYDROCODONE HYDROCHLORIDE		TdgClinicalTrial
OPRD1	OPRD1	Definite	OPRD1	DIPRENORPHINE	antagonist|agonist	GuideToPharmacology	11526449|12909189|10413036|20641600|12672796|10319982
OPRD1	OPRD1	Definite	OPRD1	BNTX	antagonist	GuideToPharmacology
OPRD1	OPRD1	Definite	OPRD1	CEBRANOPADOL	agonist	ChemblInteractions|GuideToPharmacology
OPRD1	OPRD1	Definite	OPRD1	HYDROCODONE	agonist	TdgClinicalTrial|TEND	14600248|31170174|16291875|11752352
OPRD1	OPRD1	Definite	OPRD1	SNC-80		DTC	19646882
OPRD1	OPRD1	Definite	OPRD1	OXYMORPHONE HYDROCHLORIDE	agonist	ChemblInteractions
OPRD1	OPRD1	Definite	OPRD1	PROPOXYPHENE	agonist	TdgClinicalTrial|TEND	6151117
OPRD1	OPRD1	Definite	OPRD1	ODELEPRAN	antagonist	ChemblInteractions
OPRD1	OPRD1	Definite	OPRD1	ETORPHINE	agonist	GuideToPharmacology	12606694|1665782|12672796|7739347|11752352|10999950|1316589
OPRD1	OPRD1	Definite	OPRD1	COCAINE		PharmGKB
OPRD1	OPRD1	Definite	OPRD1	METHADONE	agonist	PharmGKB	12405865|19843777|31907389
OPRD1	OPRD1	Definite	OPRD1	LOPERAMIDE	agonist	TTD	18284554|11752352|6319884
OPRD1	OPRD1	Definite	OPRD1	NALMEFENE HYDROCHLORIDE	antagonist	ChemblInteractions
OPRD1	OPRD1	Definite	OPRD1	CARFENTANIL	agonist	TTD	1656846|15853689
OPRD1	OPRD1	Definite	OPRD1	NALBUPHINE	agonist|antagonist	TdgClinicalTrial|TEND|GuideToPharmacology	2826773|11752352|8093631
OPRD1	OPRD1	Definite	OPRD1	CODEINE PHOSPHATE	agonist	ChemblInteractions
OPRD1	OPRD1	Definite	OPRD1	ELUXADOLINE	antagonist	DTC|TTD	25261794|22695132
OPRD1	OPRD1	Definite	OPRD1	CHEMBL13786		TTD
OPRD1	OPRD1	Definite	OPRD1	ADL-5747	agonist	TdgClinicalTrial|GuideToPharmacology
OPRD1	OPRD1	Definite	OPRD1	NALMEFENE	antagonist|agonist	TdgClinicalTrial|GuideToPharmacology	25187751|15956985
OPRD1	OPRD1	Definite	OPRD1	FENTANYL	agonist	TdgClinicalTrial|TEND|GuideToPharmacology|PharmGKB	15665994|16372825|15868528|30549211|19403616|16861092|15828941
OPRD1	OPRD1	Definite	OPRD1	BUPRENORPHINE	antagonist	TdgClinicalTrial|PharmGKB	23612435|30368523|16169027|16443205|24126707|30549211|19666890
OPRD1	OPRD1	Definite	OPRD1	BUTORPHANOL	agonist	TdgClinicalTrial|TEND|TTD	15942128|12470863|8746803|12127012|7705457|17909753|11752352|8968334
OPRD1	OPRD1	Definite	OPRD1	NALDEMEDINE	antagonist	GuideToPharmacology
OPRD1	OPRD1	Definite	OPRD1	CODEINE SULFATE	agonist	ChemblInteractions
OPRD1	OPRD1	Definite	OPRD1	ETHYLKETOCYCLAZOCINE	agonist	GuideToPharmacology
OPRD1	OPRD1	Definite	OPRD1	NALOXONE	antagonist	DTC|TdgClinicalTrial|TEND|GuideToPharmacology	18354714|14708857|14646257|12657847|12749773|17367258|24613457|12650833
OPRD1	OPRD1	Definite	OPRD1	NORBINALTORPHIMINE	antagonist	GuideToPharmacology
OPRD1	OPRD1	Definite	OPRD1	TRAMADOL	agonist	GuideToPharmacology|PharmGKB	19027293|30549211|31004280
OPRD1	OPRD1	Definite	OPRD1	HYDROCODONE BITARTRATE	agonist	ChemblInteractions
OPRD1	OPRD1	Definite	OPRD1	ADL-5747		TTD
OPRD1	OPRD1	Definite	OPRD1	QUADAZOCINE	antagonist	GuideToPharmacology
OPRD1	OPRD1	Definite	OPRD1	OXYCODONE	agonist	TdgClinicalTrial|TEND|PharmGKB|TTD	11752352|17525040
OPRD1	OPRD1	Definite	OPRD1	CHEMBL300662		TTD
OPRD1	OPRD1	Definite	OPRD1	OXYCODEGOL	agonist	GuideToPharmacology
OPRD1	OPRD1	Definite	OPRD1	ALVIMOPAN	antagonist	GuideToPharmacology	15882122|17340127
OPRD1	OPRD1	Definite	OPRD1	CHEMBL442577	agonist	GuideToPharmacology
OPRD1	OPRD1	Definite	OPRD1	DPDPE	agonist	GuideToPharmacology
OPRD1	OPRD1	Definite	OPRD1	ETONITAZENE	agonist	GuideToPharmacology
OPRD1	OPRD1	Definite	OPRD1	HYDROCODONE POLISTIREX	agonist	ChemblInteractions
OPRD1	OPRD1	Definite	OPRD1	OXYMORPHONE	antagonist	TdgClinicalTrial	14998329|17595308
OPRD1	OPRD1	Definite	OPRD1	NORMORPHINE	agonist	GuideToPharmacology
OPRD1	OPRD1	Definite	OPRD1	NALTRIBEN	antagonist	GuideToPharmacology
OPRD1	OPRD1	Definite	OPRD1	CODEINE POLISTIREX	agonist	ChemblInteractions
OPRD1	OPRD1	Definite	OPRD1	NALORPHINE	agonist	GuideToPharmacology
OPRD1	OPRD1	Definite	OPRD1	METHYLNALTREXONE	antagonist	GuideToPharmacology
OPRD1	OPRD1	Definite	OPRD1	NALTRINDOLE	antagonist	GuideToPharmacology
OPRD1	OPRD1	Definite	OPRD1	NALBUPHINE HYDROCHLORIDE	agonist	ChemblInteractions
OPRD1	OPRD1	Definite	OPRD1	SUFENTANIL	agonist	TdgClinicalTrial	1330549|8612823
OPRD1	OPRD1	Definite	OPRD1	ATICAPRANT	antagonist	GuideToPharmacology
OPRD1	OPRD1	Definite	OPRD1	ZYKLOPHIN	antagonist	GuideToPharmacology
OPRD1	OPRD1	Definite	OPRD1	NALTREXONE HYDROCHLORIDE	antagonist	ChemblInteractions
NDUFA4L2	NDUFA4L2	Definite	NDUFA4L2	NV-128	inhibitor	ChemblInteractions
NDUFA4L2	NDUFA4L2	Definite	NDUFA4L2	METFORMIN HYDROCHLORIDE	inhibitor	ChemblInteractions
NDUFA4L2	NDUFA4L2	Definite	NDUFA4L2	ME-344	inhibitor	ChemblInteractions
RNF112	RNF112	Definite	RNF112	ALCOHOL		NCI	12805289
SLC6A9	SLC6A9	Definite	SLC6A9	ORGANON		TTD
SLC6A9	SLC6A9	Definite	SLC6A9	BITOPERTIN	inhibitor	ChemblInteractions|GuideToPharmacology
SLC6A9	SLC6A9	Definite	SLC6A9	CHEMBL59821		TTD
SLC6A9	SLC6A9	Definite	SLC6A9	CHEMBL180966		TTD
SLC6A9	SLC6A9	Definite	SLC6A9	PF-03463275	inhibitor	GuideToPharmacology|TTD
SLC6A9	SLC6A9	Definite	SLC6A9	ORG-25935		TTD
TEK	TEK	Definite	TEK	CE-245677	inhibitor	ChemblInteractions
TEK	TEK	Definite	TEK	CETIRIZINE		DTC	22406116
TEK	TEK	Definite	TEK	CEP-11981	inhibitor	ChemblInteractions|GuideToPharmacology|TTD
TEK	TEK	Definite	TEK	REGORAFENIB	inhibitor	TALC|TdgClinicalTrial|ChemblInteractions|MyCancerGenomeClinicalTrial
TEK	TEK	Definite	TEK	GLESATINIB	inhibitor	TALC|TdgClinicalTrial
TEK	TEK	Definite	TEK	LOPERAMIDE		DTC	22406116
TEK	TEK	Definite	TEK	FORETINIB	inhibitor	ChemblInteractions
TEK	TEK	Definite	TEK	LINIFANIB	inhibitor	TdgClinicalTrial|GuideToPharmacology
TEK	TEK	Definite	TEK	ALTIRATINIB	inhibitor	ChemblInteractions|GuideToPharmacology|TTD
TEK	TEK	Definite	TEK	REBASTINIB		TTD
TEK	TEK	Definite	TEK	PEXMETINIB	inhibitor	TdgClinicalTrial|ChemblInteractions|GuideToPharmacology
TEK	TEK	Definite	TEK	MGCD-265	inhibitor	ChemblInteractions
TEK	TEK	Definite	TEK	RAZUPROTAFIB		TTD
TEK	TEK	Definite	TEK	CABOZANTINIB		ClearityFoundationClinicalTrial
TEK	TEK	Definite	TEK	GW559768X		DTC	17884497
TEK	TEK	Definite	TEK	AMPICILLIN		DTC	22406116
TEK	TEK	Definite	TEK	MERESTINIB	inhibitor	GuideToPharmacology
TEK	TEK	Definite	TEK	VANDETANIB	inhibitor	ChemblInteractions
PTP4A3	PTP4A3	Definite	PTP4A3	CETUXIMAB		CIViC	23867504
PTP4A3	PTP4A3	Definite	PTP4A3	EMODIN		DTC	22137788
CLCN3	CLCN3	Definite	CLCN3	PHLORETIN	blocker	GuideToPharmacology
CLCN3	CLCN3	Definite	CLCN3	DESACETYLBUFOTALIN		DTC	23799775
CLCN3	CLCN3	Definite	CLCN3	CINOBUFAGIN		DTC	23799775
CLCN3	CLCN3	Definite	CLCN3	BUFALIN		DTC	23799775
ITGB1	ITGB1	Definite	ITGB1	FIRATEGRAST	antagonist	TdgClinicalTrial|ChemblInteractions
ITGB1	ITGB1	Definite	ITGB1	ABITUZUMAB	inhibitor	ChemblInteractions
ITGB1	ITGB1	Definite	ITGB1	VOLOCIXIMAB	antibody|antagonist	TALC|TdgClinicalTrial|ChemblInteractions
ITGB1	ITGB1	Definite	ITGB1	NATALIZUMAB	antibody|inhibitor	ChemblInteractions
ITGB1	ITGB1	Definite	ITGB1	GLPG-0187		TdgClinicalTrial
ITGB1	ITGB1	Definite	ITGB1	INTETUMUMAB	antagonist	ChemblInteractions
ITGB1	ITGB1	Definite	ITGB1	ETARACIZUMAB	antibody	TALC
ITGB1	ITGB1	Definite	ITGB1	SAN-300		TdgClinicalTrial
ITGB1	ITGB1	Definite	ITGB1	PF-04605412	antibody	TALC
PTK7	PTK7	Definite	PTK7	COFETUZUMAB PELIDOTIN		TTD
MAFK	MAFK	Definite	MAFK	ISONIAZID		PharmGKB	22341855|29036176
MAD1L1	MAD1L1	Definite	MAD1L1	CARBOPLATIN		PharmGKB	23407047
MAD1L1	MAD1L1	Definite	MAD1L1	PACLITAXEL		PharmGKB	23407047
TGFBR2	TGFBR2	Definite	TGFBR2	IRINOTECAN		PharmGKB	27160286
TGFBR2	TGFBR2	Definite	TGFBR2	GALUNISERTIB	inhibitor	GuideToPharmacology
TGFBR2	TGFBR2	Definite	TGFBR2	HESPERETIN		DTC	23153811
PTK2B	PTK2B	Definite	PTK2B	ALOISINE	inhibitor	GuideToPharmacology
PTK2B	PTK2B	Definite	PTK2B	TESEVATINIB		TTD
PTK2B	PTK2B	Definite	PTK2B	CHEMBL580819		DTC
PTK2B	PTK2B	Definite	PTK2B	CHEMBL261692		DTC
PTK2B	PTK2B	Definite	PTK2B	ABROCITINIB		TTD
PTK2B	PTK2B	Definite	PTK2B	CHEMBL374632		DTC
PTK2B	PTK2B	Definite	PTK2B	DEFACTINIB	inhibitor	ChemblInteractions
PTK2B	PTK2B	Definite	PTK2B	PF-00562271	inhibitor	DTC|GuideToPharmacology
PTK2B	PTK2B	Definite	PTK2B	MASITINIB		TTD
PTK2B	PTK2B	Definite	PTK2B	ILORASERTIB		DTC
PTK2B	PTK2B	Definite	PTK2B	BARICITINIB	inhibitor	TTD
PTK2B	PTK2B	Definite	PTK2B	ZEARALENONE		DTC
PTK2B	PTK2B	Definite	PTK2B	HESPERADIN	inhibitor	DTC	19035792
PTK2B	PTK2B	Definite	PTK2B	CHEMBL1576310		DTC
PTK2B	PTK2B	Definite	PTK2B	PEFICITINIB		TTD
PTK2B	PTK2B	Definite	PTK2B	UPADACITINIB		TTD
PTK2B	PTK2B	Definite	PTK2B	GW843682X		DTC
PTK2B	PTK2B	Definite	PTK2B	CHEMBL600336		DTC
PTK2B	PTK2B	Definite	PTK2B	CENISERTIB		DTC
FES	FES	Definite	FES	HESPERADIN	inhibitor	DTC	19035792
FES	FES	Definite	FES	LINIFANIB		DTC
FES	FES	Definite	FES	SP-600125		DTC
FES	FES	Definite	FES	LORLATINIB	inhibitor	GuideToPharmacology
FES	FES	Definite	FES	DASATINIB		DTC
CUX2	CUX2	Definite	CUX2	RIFAMPIN		PharmGKB
TUBB3	TUBB3	Definite	TUBB3	SAGOPILONE		ChemblInteractions
TUBB3	TUBB3	Definite	TUBB3	PODOFILOX		DTC	17765552|24953821|21402478
TUBB3	TUBB3	Definite	TUBB3	PACLITAXEL	inhibitor	DTC|ClearityFoundationBiomarkers|ChemblInteractions|CGI	23631389|25369367|25768699|24457094|22595423|23313639|17887662|23387901|19758808|23725535|24953821
TUBB3	TUBB3	Definite	TUBB3	CHEMBL1935538		DTC	22435708
TUBB3	TUBB3	Definite	TUBB3	VORINOSTAT		DTC	20491440
TUBB3	TUBB3	Definite	TUBB3	BRENTUXIMAB VEDOTIN	inhibitor	ChemblInteractions
TUBB3	TUBB3	Definite	TUBB3	ERIBULIN MESYLATE	inhibitor	ChemblInteractions
TUBB3	TUBB3	Definite	TUBB3	IXABEPILONE	inhibitor	TdgClinicalTrial|ChemblInteractions	18945860|18378531|18321240
TUBB3	TUBB3	Definite	TUBB3	CHEMBL453818		DTC	12141877
TUBB3	TUBB3	Definite	TUBB3	MAYTANSINE		DTC	563462
TUBB3	TUBB3	Definite	TUBB3	CHEMBL2036119		DTC	22543234
TUBB3	TUBB3	Definite	TUBB3	TRASTUZUMAB EMTANSINE	inhibitor	ChemblInteractions
TUBB3	TUBB3	Definite	TUBB3	VINCRISTINE SULFATE	inhibitor	ChemblInteractions
TUBB3	TUBB3	Definite	TUBB3	LARGAZOLE		DTC	20491440
TUBB3	TUBB3	Definite	TUBB3	COLCHICINE	inhibitor	DTC|ChemblInteractions	23750455|25805446|24502232|25061803|25937236|24773591|25938266
TUBB3	TUBB3	Definite	TUBB3	CABAZITAXEL	inhibitor	ChemblInteractions
TUBB3	TUBB3	Definite	TUBB3	VINFLUNINE	inhibitor	ChemblInteractions
TUBB3	TUBB3	Definite	TUBB3	CHEMBL1795737		DTC	21664138
TUBB3	TUBB3	Definite	TUBB3	CYCLOSTREPTIN		DTC	17206139
TUBB3	TUBB3	Definite	TUBB3	VINORELBINE		DTC	25768699
TUBB3	TUBB3	Definite	TUBB3	CROLIBULIN	inhibitor	ChemblInteractions
TUBB3	TUBB3	Definite	TUBB3	MAYTANSINOL		DTC	563462
TUBB3	TUBB3	Definite	TUBB3	LEXIBULIN	inhibitor	ChemblInteractions
TUBB3	TUBB3	Definite	TUBB3	CURCUMIN		DTC	23830698
TUBB3	TUBB3	Definite	TUBB3	FOSBRETABULIN TROMETHAMINE		ChemblInteractions
TUBB3	TUBB3	Definite	TUBB3	CHEMBL2036124		DTC	22543234
TUBB3	TUBB3	Definite	TUBB3	VINORELBINE TARTRATE	inhibitor	ChemblInteractions
TUBB3	TUBB3	Definite	TUBB3	INDIBULIN	inhibitor	ChemblInteractions
TUBB3	TUBB3	Definite	TUBB3	ZAMPANOLIDE		DTC	19877653
TUBB3	TUBB3	Definite	TUBB3	NOCODAZOLE		DTC	21194809|25815147|25369367|25262051|23313639
TUBB3	TUBB3	Definite	TUBB3	PLINABULIN	inhibitor	ChemblInteractions
TUBB3	TUBB3	Definite	TUBB3	VERUBULIN		ChemblInteractions
TUBB3	TUBB3	Definite	TUBB3	DOCETAXEL		ClearityFoundationBiomarkers
TUBB3	TUBB3	Definite	TUBB3	DOCETAXEL	inhibitor	ChemblInteractions
TUBB3	TUBB3	Definite	TUBB3	DAVUNETIDE		ChemblInteractions
TUBB3	TUBB3	Definite	TUBB3	VINCRISTINE		DTC	16539377|21664138|23916255
TUBB3	TUBB3	Definite	TUBB3	VINBLASTINE SULFATE	inhibitor	ChemblInteractions
TUBB3	TUBB3	Definite	TUBB3	VINBLASTINE		DTC	23708010|23916255
TUBB3	TUBB3	Definite	TUBB3	COMBRETASTATIN A4		DTC	23631389|16913727|22543234|25584687|24669888|17765552|25192811
TUBB3	TUBB3	Definite	TUBB3	ABT-751		DTC	25468039
TUBB3	TUBB3	Definite	TUBB3	PACLITAXEL POLIGLUMEX		ChemblInteractions
TUBB3	TUBB3	Definite	TUBB3	FOSBRETABULIN DISODIUM	inhibitor	ChemblInteractions
GFAP	GFAP	Definite	GFAP	ISOPROTERENOL		NCI	8381971
GFAP	GFAP	Definite	GFAP	PROPRANOLOL		NCI	15328477
GFAP	GFAP	Definite	GFAP	ASPIRIN		NCI	17194886
GFAP	GFAP	Definite	GFAP	PENTOXIFYLLINE		NCI	12898537
GFAP	GFAP	Definite	GFAP	DRONABINOL		NCI	10965147
GFAP	GFAP	Definite	GFAP	COLCHICINE		NCI	10211779|15307907
GFAP	GFAP	Definite	GFAP	DISULFIRAM		NCI	1992564
GFAP	GFAP	Definite	GFAP	NIFEDIPINE		NCI	10222112|7615340|7600665
GFAP	GFAP	Definite	GFAP	NIMODIPINE		NCI	9192289
GFAP	GFAP	Definite	GFAP	METHIMAZOLE		NCI	10375702
GFAP	GFAP	Definite	GFAP	STAUROSPORINE		NCI	1720762
GFAP	GFAP	Definite	GFAP	PERMETHRIN		NCI	14555407
GFAP	GFAP	Definite	GFAP	SORBITOL		NCI	11968061
GFAP	GFAP	Definite	GFAP	PROGESTERONE		NCI	9370212
GFAP	GFAP	Definite	GFAP	OPRELVEKIN		NCI	10737606
GFAP	GFAP	Definite	GFAP	FADROZOLE		NCI	15390121
GFAP	GFAP	Definite	GFAP	LITHIUM		NCI	15056276
GFAP	GFAP	Definite	GFAP	PRASTERONE		NCI	14973190
GFAP	GFAP	Definite	GFAP	MELATONIN		NCI	10877823
GFAP	GFAP	Definite	GFAP	CAFFEINE		NCI	15260132
GFAP	GFAP	Definite	GFAP	DEMECOLCINE		NCI	3886082
GFAP	GFAP	Definite	GFAP	CAPSAICIN		NCI	15076747
GFAP	GFAP	Definite	GFAP	AMPHETAMINE		NCI	7569352|15044042
GFAP	GFAP	Definite	GFAP	GENISTEIN		NCI	10629745
GFAP	GFAP	Definite	GFAP	PIOGLITAZONE		NCI	15649489
CYP2D6	CYP2D6	Definite	CYP2D6	CLEBOPRIDE		DTC
CYP2D6	CYP2D6	Definite	CYP2D6	CHEMBL31741		DTC
CYP2D6	CYP2D6	Definite	CYP2D6	RANITIDINE		DTC	22931300
CYP2D6	CYP2D6	Definite	CYP2D6	DOXORUBICIN		DTC	22931300
CYP2D6	CYP2D6	Definite	CYP2D6	PARAROSANILINE		DTC
CYP2D6	CYP2D6	Definite	CYP2D6	FLUNISOLIDE		DTC	22931300
CYP2D6	CYP2D6	Definite	CYP2D6	TRIMIPRAMINE		PharmGKB|FDA	9918137|20531370|1346258|15252821|14716707|18359183|14520122|8867869|8181196|17721180|1527229|17667959|15115913|12360109|14646691|15205367|11682257|16024198|10774635|16361630|17008819|23486447|10460069|9585799|16871470
CYP2D6	CYP2D6	Definite	CYP2D6	KETOROLAC		PharmGKB	17986163
CYP2D6	CYP2D6	Definite	CYP2D6	NS-398		DTC
CYP2D6	CYP2D6	Definite	CYP2D6	CAPSAZEPINE		DTC
CYP2D6	CYP2D6	Definite	CYP2D6	TICRYNAFEN		DTC	22931300
CYP2D6	CYP2D6	Definite	CYP2D6	ALCOHOL		PharmGKB	24611668
CYP2D6	CYP2D6	Definite	CYP2D6	QUETIAPINE		PharmGKB	29472872|16871470
CYP2D6	CYP2D6	Definite	CYP2D6	METHOXSALEN		DTC
CYP2D6	CYP2D6	Definite	CYP2D6	MODAFINIL		DTC|NCI|PharmGKB|FDA	22931300|10820139
CYP2D6	CYP2D6	Definite	CYP2D6	BERGAPTEN		DTC
CYP2D6	CYP2D6	Definite	CYP2D6	TAMSULOSIN		PharmGKB|FDA
CYP2D6	CYP2D6	Definite	CYP2D6	CHEMBL20377		DTC
CYP2D6	CYP2D6	Definite	CYP2D6	PITOLISANT		PharmGKB|FDA
CYP2D6	CYP2D6	Definite	CYP2D6	AGROCLAVINE		DTC
CYP2D6	CYP2D6	Definite	CYP2D6	BUFLOMEDIL		DTC
CYP2D6	CYP2D6	Definite	CYP2D6	THONZONIUM		DTC
CYP2D6	CYP2D6	Definite	CYP2D6	VALPROIC ACID		DTC	22931300
CYP2D6	CYP2D6	Definite	CYP2D6	ERYTHROMYCIN		DTC	22931300
CYP2D6	CYP2D6	Definite	CYP2D6	SELEGILINE		DTC	22931300
CYP2D6	CYP2D6	Definite	CYP2D6	PAROXETINE		FDA
CYP2D6	CYP2D6	Definite	CYP2D6	ALVERINE CITRATE		DTC
CYP2D6	CYP2D6	Definite	CYP2D6	BENPERIDOL		DTC
CYP2D6	CYP2D6	Definite	CYP2D6	DEGUELIN		DTC
CYP2D6	CYP2D6	Definite	CYP2D6	METHOCARBAMOL		DTC	22931300
CYP2D6	CYP2D6	Definite	CYP2D6	GRAMINE		DTC
CYP2D6	CYP2D6	Definite	CYP2D6	DIPYRIDAMOLE		DTC
CYP2D6	CYP2D6	Definite	CYP2D6	ASARININ		DTC
CYP2D6	CYP2D6	Definite	CYP2D6	PIMETHIXENE		DTC
CYP2D6	CYP2D6	Definite	CYP2D6	DIAZOXIDE		DTC
CYP2D6	CYP2D6	Definite	CYP2D6	(R)-FLECAINIDE		DTC
CYP2D6	CYP2D6	Definite	CYP2D6	AZITHROMYCIN		DTC	22931300
CYP2D6	CYP2D6	Definite	CYP2D6	CHEMBL123904		DTC
CYP2D6	CYP2D6	Definite	CYP2D6	MEPIVACAINE		DTC	22931300
CYP2D6	CYP2D6	Definite	CYP2D6	CHEMBL1079460		DTC
CYP2D6	CYP2D6	Definite	CYP2D6	CLOTRIMAZOLE		DTC
CYP2D6	CYP2D6	Definite	CYP2D6	ZOXAZOLAMINE		DTC	22931300
CYP2D6	CYP2D6	Definite	CYP2D6	CHEMBL429095		DTC
CYP2D6	CYP2D6	Definite	CYP2D6	ELLIPTECINE		DTC
CYP2D6	CYP2D6	Definite	CYP2D6	TOLPERISONE		PharmGKB	25953735
CYP2D6	CYP2D6	Definite	CYP2D6	SB-224289		DTC
CYP2D6	CYP2D6	Definite	CYP2D6	ELIGLUSTAT		PharmGKB|FDA	20864621
CYP2D6	CYP2D6	Definite	CYP2D6	PROPAFENONE		PharmGKB|FDA	2713973|14653957|17001296|12421483|17460029
CYP2D6	CYP2D6	Definite	CYP2D6	ETHINYL ESTRADIOL		DTC	22931300
CYP2D6	CYP2D6	Definite	CYP2D6	SB-431542		DTC
CYP2D6	CYP2D6	Definite	CYP2D6	CHEMBL1394328		DTC
CYP2D6	CYP2D6	Definite	CYP2D6	KETOTIFEN		DTC
CYP2D6	CYP2D6	Definite	CYP2D6	CODEINE		FDA
CYP2D6	CYP2D6	Definite	CYP2D6	BROMAZEPAM		PharmGKB
CYP2D6	CYP2D6	Definite	CYP2D6	LOVASTATIN		DTC|PharmGKB	22281720|22931300
CYP2D6	CYP2D6	Definite	CYP2D6	DIHYDROSPINGOSINE		DTC
CYP2D6	CYP2D6	Definite	CYP2D6	CHEMBL609628		DTC
CYP2D6	CYP2D6	Definite	CYP2D6	DOCEBENONE		DTC
CYP2D6	CYP2D6	Definite	CYP2D6	GRANISETRON		PharmGKB	16551910
CYP2D6	CYP2D6	Definite	CYP2D6	PIRIBEDIL		DTC
CYP2D6	CYP2D6	Definite	CYP2D6	DOMPERIDONE		DTC
CYP2D6	CYP2D6	Definite	CYP2D6	PROPOXYCAINE		DTC
CYP2D6	CYP2D6	Definite	CYP2D6	GLUTETHIMIDE		TTD
CYP2D6	CYP2D6	Definite	CYP2D6	FLUVOXAMINE		FDA
CYP2D6	CYP2D6	Definite	CYP2D6	PHENOXYBENZAMINE		DTC	22931300
CYP2D6	CYP2D6	Definite	CYP2D6	(R,S)-INDATRALINE		DTC
CYP2D6	CYP2D6	Definite	CYP2D6	SPIPERONE		DTC
CYP2D6	CYP2D6	Definite	CYP2D6	CROMOLYN		DTC	22931300
CYP2D6	CYP2D6	Definite	CYP2D6	CHEMBL512908		DTC
CYP2D6	CYP2D6	Definite	CYP2D6	CHEMBL88147		DTC
CYP2D6	CYP2D6	Definite	CYP2D6	CHEMBL83954		DTC
CYP2D6	CYP2D6	Definite	CYP2D6	HALOPERIDOL		DTC
CYP2D6	CYP2D6	Definite	CYP2D6	RALOXIFENE		DTC	22931300
CYP2D6	CYP2D6	Definite	CYP2D6	CARVEDILOL		FDA
CYP2D6	CYP2D6	Definite	CYP2D6	ARFORMOTEROL		PharmGKB|FDA
CYP2D6	CYP2D6	Definite	CYP2D6	ALLOPURINOL		DTC	22931300
CYP2D6	CYP2D6	Definite	CYP2D6	DEXEFAROXAN		DTC
CYP2D6	CYP2D6	Definite	CYP2D6	(-)-U-50488		DTC
CYP2D6	CYP2D6	Definite	CYP2D6	ADIPHENINE		DTC
CYP2D6	CYP2D6	Definite	CYP2D6	ENDO-ATROPINE		DTC	22931300
CYP2D6	CYP2D6	Definite	CYP2D6	THIORIDAZINE		PharmGKB|FDA	19604081|2007317
CYP2D6	CYP2D6	Definite	CYP2D6	CYCLOBENZAPRINE		DTC
CYP2D6	CYP2D6	Definite	CYP2D6	HYDROCOTARNINE		DTC
CYP2D6	CYP2D6	Definite	CYP2D6	GEFITINIB		FDA
CYP2D6	CYP2D6	Definite	CYP2D6	BENZETHONIUM		DTC
CYP2D6	CYP2D6	Definite	CYP2D6	CHEMBL1288013		DTC
CYP2D6	CYP2D6	Definite	CYP2D6	U-50488 METHANE SULFONATE		DTC
CYP2D6	CYP2D6	Definite	CYP2D6	BENZAMIL		DTC
CYP2D6	CYP2D6	Definite	CYP2D6	PHENYLBUTAZONE		DTC	22931300
CYP2D6	CYP2D6	Definite	CYP2D6	OXYMETAZOLINE		DTC
CYP2D6	CYP2D6	Definite	CYP2D6	PNU-99194A		DTC
CYP2D6	CYP2D6	Definite	CYP2D6	PALONOSETRON		PharmGKB|FDA
CYP2D6	CYP2D6	Definite	CYP2D6	CEVIMELINE		PharmGKB|FDA
CYP2D6	CYP2D6	Definite	CYP2D6	DOXEPIN		FDA
CYP2D6	CYP2D6	Definite	CYP2D6	BECLOMETHASONE		DTC	22931300
CYP2D6	CYP2D6	Definite	CYP2D6	TACROLIMUS		NCI	17202802
CYP2D6	CYP2D6	Definite	CYP2D6	NITROFURANTOIN		DTC	22931300
CYP2D6	CYP2D6	Definite	CYP2D6	REMOXIPRIDE		DTC	22931300
CYP2D6	CYP2D6	Definite	CYP2D6	CORYNANTHEINE		DTC
CYP2D6	CYP2D6	Definite	CYP2D6	EMODIN		DTC
CYP2D6	CYP2D6	Definite	CYP2D6	NIACIN		DTC	22931300
CYP2D6	CYP2D6	Definite	CYP2D6	BUDESONIDE		DTC	22931300
CYP2D6	CYP2D6	Definite	CYP2D6	OLVANIL		DTC
CYP2D6	CYP2D6	Definite	CYP2D6	SOTALOL		DTC	22931300
CYP2D6	CYP2D6	Definite	CYP2D6	DEXTROMETHORPHAN		DTC|FDA	21422192
CYP2D6	CYP2D6	Definite	CYP2D6	CHEMBL177809		DTC
CYP2D6	CYP2D6	Definite	CYP2D6	DIDANOSINE		DTC	22931300
CYP2D6	CYP2D6	Definite	CYP2D6	DAPOXETINE		PharmGKB	26937172
CYP2D6	CYP2D6	Definite	CYP2D6	CHEMBL1339015		DTC
CYP2D6	CYP2D6	Definite	CYP2D6	PROPYLPYRAZOLETRIOL		DTC
CYP2D6	CYP2D6	Definite	CYP2D6	TELENZEPINE		DTC
CYP2D6	CYP2D6	Definite	CYP2D6	INDINAVIR		DTC	22931300
CYP2D6	CYP2D6	Definite	CYP2D6	PHENOBARBITAL		DTC	22931300
CYP2D6	CYP2D6	Definite	CYP2D6	CHEMBL1329326		DTC
CYP2D6	CYP2D6	Definite	CYP2D6	GARLIC		NCI	15974642
CYP2D6	CYP2D6	Definite	CYP2D6	DULOXETINE		FDA
CYP2D6	CYP2D6	Definite	CYP2D6	MEFENAMIC ACID		DTC	22931300
CYP2D6	CYP2D6	Definite	CYP2D6	BREXPIPRAZOLE		PharmGKB|FDA
CYP2D6	CYP2D6	Definite	CYP2D6	CHEMBL591613		DTC
CYP2D6	CYP2D6	Definite	CYP2D6	DEXTROMETHORPHAN HYDROBROMIDE		DTC
CYP2D6	CYP2D6	Definite	CYP2D6	DIPHENHYDRAMINE		DTC	22931300
CYP2D6	CYP2D6	Definite	CYP2D6	CIMETIDINE		DTC	22931300
CYP2D6	CYP2D6	Definite	CYP2D6	AMSACRINE		DTC	22931300
CYP2D6	CYP2D6	Definite	CYP2D6	INDOMETHACIN		DTC	22931300
CYP2D6	CYP2D6	Definite	CYP2D6	CHLOROPYRAMINE		DTC
CYP2D6	CYP2D6	Definite	CYP2D6	DONEPEZIL		PharmGKB|FDA	24433464|26952092
CYP2D6	CYP2D6	Definite	CYP2D6	NORDIHYDROGUAIARETIC ACID		DTC
CYP2D6	CYP2D6	Definite	CYP2D6	CLOFAZIMINE		DTC
CYP2D6	CYP2D6	Definite	CYP2D6	MAPROTILINE HYDROCHLORIDE		DTC
CYP2D6	CYP2D6	Definite	CYP2D6	ISOQUINE		TTD
CYP2D6	CYP2D6	Definite	CYP2D6	LOFEXIDINE		PharmGKB|FDA
CYP2D6	CYP2D6	Definite	CYP2D6	SULINDAC		DTC	22931300
CYP2D6	CYP2D6	Definite	CYP2D6	COLCHICINE		DTC|PharmGKB	22931300|25645282
CYP2D6	CYP2D6	Definite	CYP2D6	VERNAKALANT		PharmGKB
CYP2D6	CYP2D6	Definite	CYP2D6	TACRINE		DTC	22931300
CYP2D6	CYP2D6	Definite	CYP2D6	MORPHINE		PharmGKB	19523031|8351162|17986163
CYP2D6	CYP2D6	Definite	CYP2D6	PYRILAMINE		DTC
CYP2D6	CYP2D6	Definite	CYP2D6	MIRABEGRON		PharmGKB|FDA
CYP2D6	CYP2D6	Definite	CYP2D6	PHENYTOIN		DTC|PharmGKB	22931300|24915025
CYP2D6	CYP2D6	Definite	CYP2D6	ACETAMINOPHEN		DTC|PharmGKB	19219744|11095574|26049587|19308365|22931300|17564651
CYP2D6	CYP2D6	Definite	CYP2D6	DYCLONINE		DTC
CYP2D6	CYP2D6	Definite	CYP2D6	HYDROMORPHONE		PharmGKB	17986163
CYP2D6	CYP2D6	Definite	CYP2D6	NICLOSAMIDE		DTC
CYP2D6	CYP2D6	Definite	CYP2D6	ESOXYBUTYNIN		DTC
CYP2D6	CYP2D6	Definite	CYP2D6	GLAFENINE		DTC	22931300
CYP2D6	CYP2D6	Definite	CYP2D6	DEXAMETHASONE		DTC	22931300
CYP2D6	CYP2D6	Definite	CYP2D6	TIMOLOL		DTC|PharmGKB	7474246|16315032
CYP2D6	CYP2D6	Definite	CYP2D6	(S)-AMPA		DTC
CYP2D6	CYP2D6	Definite	CYP2D6	MECLIZINE		DTC|PharmGKB|FDA	22931300
CYP2D6	CYP2D6	Definite	CYP2D6	TIOTROPIUM		PharmGKB
CYP2D6	CYP2D6	Definite	CYP2D6	DROPERIDOL		DTC
CYP2D6	CYP2D6	Definite	CYP2D6	CLOFIBRIC ACID		DTC
CYP2D6	CYP2D6	Definite	CYP2D6	LORATADINE		DTC
CYP2D6	CYP2D6	Definite	CYP2D6	RACLOPRIDE		DTC
CYP2D6	CYP2D6	Definite	CYP2D6	MONTELUKAST		DTC	22931300
CYP2D6	CYP2D6	Definite	CYP2D6	CLOFIBRATE		DTC	22931300
CYP2D6	CYP2D6	Definite	CYP2D6	GUAIFENESIN		DTC	22931300
CYP2D6	CYP2D6	Definite	CYP2D6	PIPENZOLATE		DTC
CYP2D6	CYP2D6	Definite	CYP2D6	ISOBOLDINE		DTC
CYP2D6	CYP2D6	Definite	CYP2D6	(R,S)-IFENPRODIL		DTC
CYP2D6	CYP2D6	Definite	CYP2D6	PROMAZINE		DTC
CYP2D6	CYP2D6	Definite	CYP2D6	(R)-PINOCEMBRIN		DTC
CYP2D6	CYP2D6	Definite	CYP2D6	ZOLANTIDINE		DTC
CYP2D6	CYP2D6	Definite	CYP2D6	CLEMASTINE		DTC	22931300
CYP2D6	CYP2D6	Definite	CYP2D6	DESIPRAMINE		DTC|PharmGKB|FDA	9918137|8422746|20531370|10895986|1346258|15252821|14652703|14716707|6488689|18359183|14520122|8867869|9049581|8181196|8941025|17721180|3533565|3356084|17667959|15115913|12360109|14646691|15205367|27440861|11682257|16024198|3769385|16361630|17008819|23486447|10460069|9585799|16871470|11417443
CYP2D6	CYP2D6	Definite	CYP2D6	BUTYLATED HYDROXYTOLUENE		DTC	22931300
CYP2D6	CYP2D6	Definite	CYP2D6	APTIGANEL		DTC
CYP2D6	CYP2D6	Definite	CYP2D6	PI-CLONIDINE		DTC
CYP2D6	CYP2D6	Definite	CYP2D6	DAIDZEIN		DTC
CYP2D6	CYP2D6	Definite	CYP2D6	KETOPROFEN		PharmGKB	25989235
CYP2D6	CYP2D6	Definite	CYP2D6	SULPIRIDE		DTC	22931300
CYP2D6	CYP2D6	Definite	CYP2D6	UPADACITINIB		PharmGKB|FDA
CYP2D6	CYP2D6	Definite	CYP2D6	CHEMBL434063		DTC
CYP2D6	CYP2D6	Definite	CYP2D6	ECADOTRIL		DTC
CYP2D6	CYP2D6	Definite	CYP2D6	AMITRIPTYLINE		DTC|FDA	22931300
CYP2D6	CYP2D6	Definite	CYP2D6	TERBINAFINE		PharmGKB
CYP2D6	CYP2D6	Definite	CYP2D6	CLOMIPRAMINE		DTC|FDA
CYP2D6	CYP2D6	Definite	CYP2D6	HYDROXYZINE		DTC	22931300
CYP2D6	CYP2D6	Definite	CYP2D6	TAMOXIFEN CITRATE		DTC
CYP2D6	CYP2D6	Definite	CYP2D6	FASUDIL		DTC
CYP2D6	CYP2D6	Definite	CYP2D6	BERBERINE		DTC
CYP2D6	CYP2D6	Definite	CYP2D6	IBRUTINIB		PharmGKB
CYP2D6	CYP2D6	Definite	CYP2D6	CLARITHROMYCIN		DTC	22931300
CYP2D6	CYP2D6	Definite	CYP2D6	CARIPRAZINE		PharmGKB|FDA
CYP2D6	CYP2D6	Definite	CYP2D6	CHEMBL591126		DTC
CYP2D6	CYP2D6	Definite	CYP2D6	DIPHENYLPYRALINE		DTC
CYP2D6	CYP2D6	Definite	CYP2D6	CLONIDINE		DTC|PharmGKB
CYP2D6	CYP2D6	Definite	CYP2D6	PENICILLIN V BENZATHINE		DTC
CYP2D6	CYP2D6	Definite	CYP2D6	FLUOXETINE		DTC|FDA	22931300
CYP2D6	CYP2D6	Definite	CYP2D6	DALFAMPRIDINE		DTC
CYP2D6	CYP2D6	Definite	CYP2D6	ISOXSUPRINE		DTC
CYP2D6	CYP2D6	Definite	CYP2D6	METHYLDOPA		DTC	22931300
CYP2D6	CYP2D6	Definite	CYP2D6	DICYCLOMINE		DTC
CYP2D6	CYP2D6	Definite	CYP2D6	TORSEMIDE		DTC	22931300
CYP2D6	CYP2D6	Definite	CYP2D6	NEFAZODONE		PharmGKB|FDA
CYP2D6	CYP2D6	Definite	CYP2D6	CHEMBL66114		DTC
CYP2D6	CYP2D6	Definite	CYP2D6	CYC-116		DTC	20462263
CYP2D6	CYP2D6	Definite	CYP2D6	CHEMBL74121		DTC
CYP2D6	CYP2D6	Definite	CYP2D6	PLICAMYCIN		DTC	22931300
CYP2D6	CYP2D6	Definite	CYP2D6	PREDNISONE		DTC	22931300
CYP2D6	CYP2D6	Definite	CYP2D6	CHLOROPHENYLPIPERAZINE		DTC
CYP2D6	CYP2D6	Definite	CYP2D6	CHEMBL187216		DTC
CYP2D6	CYP2D6	Definite	CYP2D6	FENTANYL		PharmGKB	25825958
CYP2D6	CYP2D6	Definite	CYP2D6	PIMOZIDE		DTC|PharmGKB|FDA	9951426|23059146
CYP2D6	CYP2D6	Definite	CYP2D6	GLYCINE		DTC	22931300
CYP2D6	CYP2D6	Definite	CYP2D6	HARMALINE		DTC
CYP2D6	CYP2D6	Definite	CYP2D6	TETRABENAZINE		PharmGKB|FDA	23280482
CYP2D6	CYP2D6	Definite	CYP2D6	ZUCLOPENTHIXOL		PharmGKB	12107620|1927573
CYP2D6	CYP2D6	Definite	CYP2D6	PROCHLORPERAZINE		DTC	22931300
CYP2D6	CYP2D6	Definite	CYP2D6	CHEMBL587259		DTC
CYP2D6	CYP2D6	Definite	CYP2D6	DEXPROPRANOLOL		DTC
CYP2D6	CYP2D6	Definite	CYP2D6	DIHYDROXIDINE		DTC
CYP2D6	CYP2D6	Definite	CYP2D6	STAVUDINE		DTC	22931300
CYP2D6	CYP2D6	Definite	CYP2D6	GRAVEOLINE		DTC
CYP2D6	CYP2D6	Definite	CYP2D6	PALIPERIDONE		PharmGKB|FDA	15767244
CYP2D6	CYP2D6	Definite	CYP2D6	SULFASALAZINE		DTC	22931300
CYP2D6	CYP2D6	Definite	CYP2D6	SPIRAMIDE		DTC
CYP2D6	CYP2D6	Definite	CYP2D6	AMPHETAMINE		NCI|PharmGKB|FDA	9264312
CYP2D6	CYP2D6	Definite	CYP2D6	LINEZOLID		DTC	24044938
CYP2D6	CYP2D6	Definite	CYP2D6	AMOXICILLIN		DTC	22931300
CYP2D6	CYP2D6	Definite	CYP2D6	ZAFIRLUKAST		DTC	22931300
CYP2D6	CYP2D6	Definite	CYP2D6	CHEMBL1161520		DTC
CYP2D6	CYP2D6	Definite	CYP2D6	SERTINDOLE		PharmGKB
CYP2D6	CYP2D6	Definite	CYP2D6	CHEMBL327980		DTC
CYP2D6	CYP2D6	Definite	CYP2D6	NORTRIPTYLINE		DTC|FDA
CYP2D6	CYP2D6	Definite	CYP2D6	ZILEUTON		DTC	22931300
CYP2D6	CYP2D6	Definite	CYP2D6	ARIPIPRAZOLE		FDA
CYP2D6	CYP2D6	Definite	CYP2D6	CHEMBL580421		DTC
CYP2D6	CYP2D6	Definite	CYP2D6	DIETHYLSTILBESTROL		DTC	22931300
CYP2D6	CYP2D6	Definite	CYP2D6	ASTEMIZOLE		DTC
CYP2D6	CYP2D6	Definite	CYP2D6	MEXILETINE		NCI|PharmGKB	9806111
CYP2D6	CYP2D6	Definite	CYP2D6	CEFTRIAXONE		DTC	22931300
CYP2D6	CYP2D6	Definite	CYP2D6	BENOXINATE		DTC
CYP2D6	CYP2D6	Definite	CYP2D6	RITANSERIN		DTC
CYP2D6	CYP2D6	Definite	CYP2D6	CHEMBL275311		DTC
CYP2D6	CYP2D6	Definite	CYP2D6	CHEMBL88272		DTC
CYP2D6	CYP2D6	Definite	CYP2D6	IODOMELATONIN		DTC
CYP2D6	CYP2D6	Definite	CYP2D6	CHEMBL287327		DTC
CYP2D6	CYP2D6	Definite	CYP2D6	NAPHAZOLINE		DTC
CYP2D6	CYP2D6	Definite	CYP2D6	PERPHENAZINE		DTC|PharmGKB|FDA	2743709
CYP2D6	CYP2D6	Definite	CYP2D6	RUCAPARIB		PharmGKB|FDA
CYP2D6	CYP2D6	Definite	CYP2D6	HYCANTHONE		DTC	22931300
CYP2D6	CYP2D6	Definite	CYP2D6	GUANFACINE		DTC
CYP2D6	CYP2D6	Definite	CYP2D6	CHLOROQUINE		DTC	22931300
CYP2D6	CYP2D6	Definite	CYP2D6	OXYMORPHONE		PharmGKB
CYP2D6	CYP2D6	Definite	CYP2D6	FORMOTEROL		PharmGKB|FDA
CYP2D6	CYP2D6	Definite	CYP2D6	TROLEANDOMYCIN		DTC	22931300
CYP2D6	CYP2D6	Definite	CYP2D6	PHENELZINE		DTC
CYP2D6	CYP2D6	Definite	CYP2D6	UMECLIDINIUM		PharmGKB|FDA
CYP2D6	CYP2D6	Definite	CYP2D6	NEBIVOLOL		PharmGKB|FDA
CYP2D6	CYP2D6	Definite	CYP2D6	RAUWOLFIA SERPENTINA		DTC
CYP2D6	CYP2D6	Definite	CYP2D6	VANOXERINE		DTC
CYP2D6	CYP2D6	Definite	CYP2D6	BOLDINE		DTC
CYP2D6	CYP2D6	Definite	CYP2D6	PROTRIPTYLINE		DTC|PharmGKB|FDA
CYP2D6	CYP2D6	Definite	CYP2D6	ALBUMIN HUMAN		NCI	11246175
CYP2D6	CYP2D6	Definite	CYP2D6	MAPROTILINE		DTC	22931300
CYP2D6	CYP2D6	Definite	CYP2D6	ELETRIPTAN		PharmGKB
CYP2D6	CYP2D6	Definite	CYP2D6	CLOBENPROPIT		DTC
CYP2D6	CYP2D6	Definite	CYP2D6	CHEMBL53898		DTC
CYP2D6	CYP2D6	Definite	CYP2D6	TOLTERODINE		PharmGKB|FDA	21352267|20530222|10190648|9630826|10583026|28087463
CYP2D6	CYP2D6	Definite	CYP2D6	RILMENIDINE		DTC
CYP2D6	CYP2D6	Definite	CYP2D6	LANSOPRAZOLE		DTC
CYP2D6	CYP2D6	Definite	CYP2D6	CHEMBL547101		DTC
CYP2D6	CYP2D6	Definite	CYP2D6	CHEMBL1256851		DTC
CYP2D6	CYP2D6	Definite	CYP2D6	METYROSINE		DTC	22931300
CYP2D6	CYP2D6	Definite	CYP2D6	VANIPREVIR		DTC	19841155
CYP2D6	CYP2D6	Definite	CYP2D6	CHEMBL1410004		DTC
CYP2D6	CYP2D6	Definite	CYP2D6	CHLORPROMAZINE		DTC|PharmGKB	8739822
CYP2D6	CYP2D6	Definite	CYP2D6	MIRTAZAPINE		DTC
CYP2D6	CYP2D6	Definite	CYP2D6	PSEUDOEPHEDRINE		DTC
CYP2D6	CYP2D6	Definite	CYP2D6	METOPROLOL		FDA
CYP2D6	CYP2D6	Definite	CYP2D6	CHEMBL85194		DTC
CYP2D6	CYP2D6	Definite	CYP2D6	PERHEXILINE		DTC|PharmGKB	22931300
CYP2D6	CYP2D6	Definite	CYP2D6	VORICONAZOLE		NCI	16141569
CYP2D6	CYP2D6	Definite	CYP2D6	AZATHIOPRINE		DTC	22931300
CYP2D6	CYP2D6	Definite	CYP2D6	PROPYLTHIOURACIL		DTC	22931300
CYP2D6	CYP2D6	Definite	CYP2D6	PYRAZINAMIDE		DTC	22931300
CYP2D6	CYP2D6	Definite	CYP2D6	IBUPROFEN		DTC	22931300
CYP2D6	CYP2D6	Definite	CYP2D6	U-0126		DTC
CYP2D6	CYP2D6	Definite	CYP2D6	CIPROFLOXACIN		DTC|PharmGKB	27469576|22931300
CYP2D6	CYP2D6	Definite	CYP2D6	CYPROTERONE		DTC	22931300
CYP2D6	CYP2D6	Definite	CYP2D6	ETOPOSIDE		DTC	22931300
CYP2D6	CYP2D6	Definite	CYP2D6	CILOSTAZOL		DTC	22931300
CYP2D6	CYP2D6	Definite	CYP2D6	BP-897		DTC
CYP2D6	CYP2D6	Definite	CYP2D6	DARIFENACIN		PharmGKB|FDA
CYP2D6	CYP2D6	Definite	CYP2D6	CHEMBL1096339		DTC
CYP2D6	CYP2D6	Definite	CYP2D6	DANTROLENE		DTC	22931300
CYP2D6	CYP2D6	Definite	CYP2D6	CHEMBL601135		DTC
CYP2D6	CYP2D6	Definite	CYP2D6	PROPRANOLOL		DTC|FDA	22931300
CYP2D6	CYP2D6	Definite	CYP2D6	CHEMBL530733		DTC
CYP2D6	CYP2D6	Definite	CYP2D6	CYPROHEPTADINE		DTC
CYP2D6	CYP2D6	Definite	CYP2D6	LEUCINE		DTC	22931300
CYP2D6	CYP2D6	Definite	CYP2D6	CHEMBL333121		DTC
CYP2D6	CYP2D6	Definite	CYP2D6	GALANTAMINE		PharmGKB|FDA	23503455
CYP2D6	CYP2D6	Definite	CYP2D6	DEXTROMEPROMAZINE		DTC
CYP2D6	CYP2D6	Definite	CYP2D6	PAPAVERINE		DTC
CYP2D6	CYP2D6	Definite	CYP2D6	E-DOXEPIN		DTC
CYP2D6	CYP2D6	Definite	CYP2D6	CHEMBL287045		DTC
CYP2D6	CYP2D6	Definite	CYP2D6	APOMORPHINE		DTC
CYP2D6	CYP2D6	Definite	CYP2D6	DIMETHISOQUIN		DTC
CYP2D6	CYP2D6	Definite	CYP2D6	CHEMBL335741		DTC
CYP2D6	CYP2D6	Definite	CYP2D6	METOCLOPRAMIDE		FDA
CYP2D6	CYP2D6	Definite	CYP2D6	KETANSERIN TARTRATE		DTC
CYP2D6	CYP2D6	Definite	CYP2D6	CHEMBL445102		DTC
CYP2D6	CYP2D6	Definite	CYP2D6	L-694247		DTC
CYP2D6	CYP2D6	Definite	CYP2D6	LEVOMEPROMAZINE		PharmGKB	19308365|29472872
CYP2D6	CYP2D6	Definite	CYP2D6	TRIMETHOPRIM		DTC	22931300
CYP2D6	CYP2D6	Definite	CYP2D6	VORTIOXETINE		PharmGKB|FDA
CYP2D6	CYP2D6	Definite	CYP2D6	BIOCHANIN		DTC
CYP2D6	CYP2D6	Definite	CYP2D6	SP-600125		DTC
CYP2D6	CYP2D6	Definite	CYP2D6	ETHYLISOTHIOUREA		DTC
CYP2D6	CYP2D6	Definite	CYP2D6	NATEGLINIDE		DTC	22931300
CYP2D6	CYP2D6	Definite	CYP2D6	AZTREONAM		DTC	22931300
CYP2D6	CYP2D6	Definite	CYP2D6	AMOXAPINE		DTC|PharmGKB|FDA
CYP2D6	CYP2D6	Definite	CYP2D6	THIOPERAMIDE		DTC
CYP2D6	CYP2D6	Definite	CYP2D6	DRONEDARONE		PharmGKB
CYP2D6	CYP2D6	Definite	CYP2D6	CHEMBL79140		DTC
CYP2D6	CYP2D6	Definite	CYP2D6	OXYBUTYNIN		DTC	22931300
CYP2D6	CYP2D6	Definite	CYP2D6	LOPERAMIDE		DTC
CYP2D6	CYP2D6	Definite	CYP2D6	DICLOFENAC		DTC	22931300
CYP2D6	CYP2D6	Definite	CYP2D6	KARANJIN		DTC
CYP2D6	CYP2D6	Definite	CYP2D6	PF-03715455		DTC	21888439
CYP2D6	CYP2D6	Definite	CYP2D6	AMIODARONE		DTC|PharmGKB
CYP2D6	CYP2D6	Definite	CYP2D6	CHEMBL83899		DTC
CYP2D6	CYP2D6	Definite	CYP2D6	PHENTOLAMINE MESYLATE		DTC
CYP2D6	CYP2D6	Definite	CYP2D6	ALPROSTADIL		DTC	22931300
CYP2D6	CYP2D6	Definite	CYP2D6	CLOMETHIAZOLE		DTC
CYP2D6	CYP2D6	Definite	CYP2D6	TRIFLUPROMAZINE		DTC
CYP2D6	CYP2D6	Definite	CYP2D6	REL-CISAPRIDE		DTC	22931300
CYP2D6	CYP2D6	Definite	CYP2D6	HARMOL		DTC
CYP2D6	CYP2D6	Definite	CYP2D6	NEVIRAPINE		DTC|PharmGKB	22931300
CYP2D6	CYP2D6	Definite	CYP2D6	MINOCYCLINE		DTC	22931300
CYP2D6	CYP2D6	Definite	CYP2D6	CAFFEINE		DTC	22931300
CYP2D6	CYP2D6	Definite	CYP2D6	CHEMBL71294		DTC
CYP2D6	CYP2D6	Definite	CYP2D6	LEVOBUPIVACAINE		DTC
CYP2D6	CYP2D6	Definite	CYP2D6	IMIPRAMINE		DTC|FDA	22931300
CYP2D6	CYP2D6	Definite	CYP2D6	CORTICOTROPIN		NCI	12571407
CYP2D6	CYP2D6	Definite	CYP2D6	RITONAVIR		PharmGKB	24433361
CYP2D6	CYP2D6	Definite	CYP2D6	LAPACHONE		DTC
CYP2D6	CYP2D6	Definite	CYP2D6	ICI-199,441		DTC
CYP2D6	CYP2D6	Definite	CYP2D6	PROPANTHELINE		DTC
CYP2D6	CYP2D6	Definite	CYP2D6	CHEMBL258465		DTC
CYP2D6	CYP2D6	Definite	CYP2D6	METARAMINOL		DTC	22931300
CYP2D6	CYP2D6	Definite	CYP2D6	FLIBANSERIN		PharmGKB|FDA
CYP2D6	CYP2D6	Definite	CYP2D6	HYDROCODONE		PharmGKB	9352573|12920424|25621429|24269714|20837591|7693389|16631290
CYP2D6	CYP2D6	Definite	CYP2D6	CHEMBL1256678		DTC
CYP2D6	CYP2D6	Definite	CYP2D6	HYDRALAZINE		DTC	22931300
CYP2D6	CYP2D6	Definite	CYP2D6	ISOPROPAMIDE		DTC
CYP2D6	CYP2D6	Definite	CYP2D6	ATORVASTATIN		PharmGKB	17700359
CYP2D6	CYP2D6	Definite	CYP2D6	3',4' DICHLOROBENZAMIL		DTC
CYP2D6	CYP2D6	Definite	CYP2D6	FIPEXIDE		DTC
CYP2D6	CYP2D6	Definite	CYP2D6	FLUCONAZOLE		DTC	22931300
CYP2D6	CYP2D6	Definite	CYP2D6	INDIRUBIN-3-MONOXIME		DTC
CYP2D6	CYP2D6	Definite	CYP2D6	CHEMBL1358137		DTC
CYP2D6	CYP2D6	Definite	CYP2D6	CHLORPROPAMIDE		DTC	22931300
CYP2D6	CYP2D6	Definite	CYP2D6	CITALOPRAM		FDA
CYP2D6	CYP2D6	Definite	CYP2D6	HYDROXYCHLOROQUINE		NCI	10848718
CYP2D6	CYP2D6	Definite	CYP2D6	IPRATROPIUM		DTC	22931300
CYP2D6	CYP2D6	Definite	CYP2D6	CHEMBL1169388		DTC
CYP2D6	CYP2D6	Definite	CYP2D6	DESVENLAFAXINE		PharmGKB|FDA	29327975
CYP2D6	CYP2D6	Definite	CYP2D6	MICONAZOLE		DTC
CYP2D6	CYP2D6	Definite	CYP2D6	DEUTETRABENAZINE		PharmGKB|FDA
CYP2D6	CYP2D6	Definite	CYP2D6	CHEMBL1513392		DTC
CYP2D6	CYP2D6	Definite	CYP2D6	HYDRASTININE		DTC
CYP2D6	CYP2D6	Definite	CYP2D6	(S)-ROSCOVITINE		DTC
CYP2D6	CYP2D6	Definite	CYP2D6	BAICALEIN		DTC
CYP2D6	CYP2D6	Definite	CYP2D6	CHEMBL1337960		DTC
CYP2D6	CYP2D6	Definite	CYP2D6	OLOMOUCINE		DTC
CYP2D6	CYP2D6	Definite	CYP2D6	TERAZOSIN		DTC	22931300
CYP2D6	CYP2D6	Definite	CYP2D6	KETOCONAZOLE		DTC	22931300
CYP2D6	CYP2D6	Definite	CYP2D6	GENTAMICIN		DTC	22931300
CYP2D6	CYP2D6	Definite	CYP2D6	TETRACYCLINE		DTC	22931300
CYP2D6	CYP2D6	Definite	CYP2D6	MEPRYLCAINE		DTC
CYP2D6	CYP2D6	Definite	CYP2D6	TAMOXIFEN		FDA
CYP2D6	CYP2D6	Definite	CYP2D6	SULFADOXINE		DTC	22931300
CYP2D6	CYP2D6	Definite	CYP2D6	KAEMPFEROL		DTC
CYP2D6	CYP2D6	Definite	CYP2D6	METHYLPHENIDATE		NCI	10831022
CYP2D6	CYP2D6	Definite	CYP2D6	CHEMBL285932		DTC
CYP2D6	CYP2D6	Definite	CYP2D6	LY-294002		DTC
CYP2D6	CYP2D6	Definite	CYP2D6	CHEMBL601110		DTC
CYP2D6	CYP2D6	Definite	CYP2D6	FLUSPIRILENE		DTC
CYP2D6	CYP2D6	Definite	CYP2D6	DISOPYRAMIDE		PharmGKB
CYP2D6	CYP2D6	Definite	CYP2D6	CARBETAPENTANE		DTC
CYP2D6	CYP2D6	Definite	CYP2D6	CHEMBL336095		DTC
CYP2D6	CYP2D6	Definite	CYP2D6	STREPTOZOCIN		NCI	6305526
CYP2D6	CYP2D6	Definite	CYP2D6	MIDODRINE		DTC	22931300
CYP2D6	CYP2D6	Definite	CYP2D6	MERCAPTOPURINE		DTC	22931300
CYP2D6	CYP2D6	Definite	CYP2D6	ILOPERIDONE		PharmGKB|FDA	23277250
CYP2D6	CYP2D6	Definite	CYP2D6	ACACETIN		DTC
CYP2D6	CYP2D6	Definite	CYP2D6	PHENTOLAMINE		DTC
CYP2D6	CYP2D6	Definite	CYP2D6	(R)-PROCYCLIDINE		DTC
CYP2D6	CYP2D6	Definite	CYP2D6	CYTARABINE		DTC	22931300
CYP2D6	CYP2D6	Definite	CYP2D6	YOHIMBINE		PharmGKB	15289791
CYP2D6	CYP2D6	Definite	CYP2D6	METHAPYRILENE		DTC
CYP2D6	CYP2D6	Definite	CYP2D6	CHLORPHENIRAMINE		PharmGKB
CYP2D6	CYP2D6	Definite	CYP2D6	ACEPROMAZINE		DTC
CYP2D6	CYP2D6	Definite	CYP2D6	MITOMYCIN		DTC	22931300
CYP2D6	CYP2D6	Definite	CYP2D6	DOFETILIDE		DTC	22931300
CYP2D6	CYP2D6	Definite	CYP2D6	NISOLDIPINE		DTC	22931300
CYP2D6	CYP2D6	Definite	CYP2D6	FESOTERODINE		PharmGKB|FDA
CYP2D6	CYP2D6	Definite	CYP2D6	CHEMBL51697		DTC
CYP2D6	CYP2D6	Definite	CYP2D6	PAPAVEROLINE		DTC
CYP2D6	CYP2D6	Definite	CYP2D6	ATOMOXETINE		DTC|FDA
CYP2D6	CYP2D6	Definite	CYP2D6	SR-2640		DTC
CYP2D6	CYP2D6	Definite	CYP2D6	DEQUALINIUM		DTC
CYP2D6	CYP2D6	Definite	CYP2D6	SNC-80		DTC
CYP2D6	CYP2D6	Definite	CYP2D6	PRIDINOL		DTC
CYP2D6	CYP2D6	Definite	CYP2D6	PIPERACETAZINE		DTC
CYP2D6	CYP2D6	Definite	CYP2D6	E-FLUPENTIXOL		PharmGKB
CYP2D6	CYP2D6	Definite	CYP2D6	MANGOSTIN		DTC
CYP2D6	CYP2D6	Definite	CYP2D6	GR-55562		DTC
CYP2D6	CYP2D6	Definite	CYP2D6	TIOTIDINE		DTC
CYP2D6	CYP2D6	Definite	CYP2D6	U-50488 METHANE SULFONATE		DTC
CYP2D6	CYP2D6	Definite	CYP2D6	HALOFANTRINE HYDROCHLORIDE		DTC
CYP2D6	CYP2D6	Definite	CYP2D6	ZIDOVUDINE		DTC	22931300
CYP2D6	CYP2D6	Definite	CYP2D6	OXETHAZAINE		DTC
CYP2D6	CYP2D6	Definite	CYP2D6	N-DESMETHYLCLOZAPINE		DTC
CYP2D6	CYP2D6	Definite	CYP2D6	CHEMBL1269022		DTC
CYP2D6	CYP2D6	Definite	CYP2D6	GABAZINE		DTC
CYP2D6	CYP2D6	Definite	CYP2D6	CHEMBL527271		DTC
CYP2D6	CYP2D6	Definite	CYP2D6	LABETALOL		DTC	22931300
CYP2D6	CYP2D6	Definite	CYP2D6	TRIFLUOPERAZINE		DTC
CYP2D6	CYP2D6	Definite	CYP2D6	PIRINIXIC ACID		DTC
CYP2D6	CYP2D6	Definite	CYP2D6	CHEMBL303336		DTC
CYP2D6	CYP2D6	Definite	CYP2D6	5-(N-METHYL-N-ISOBUTYL)AMILORIDE		DTC
CYP2D6	CYP2D6	Definite	CYP2D6	CHEMBL476501		DTC
CYP2D6	CYP2D6	Definite	CYP2D6	CHEMBL362863		DTC
CYP2D6	CYP2D6	Definite	CYP2D6	FLOXURIDINE		DTC	22931300
CYP2D6	CYP2D6	Definite	CYP2D6	4-CHLOROMERCURIBENZOIC ACID		DTC
CYP2D6	CYP2D6	Definite	CYP2D6	OXOTREMORINE		DTC
CYP2D6	CYP2D6	Definite	CYP2D6	CHEMBL8565		DTC
CYP2D6	CYP2D6	Definite	CYP2D6	CHEMBL598270		DTC
CYP2D6	CYP2D6	Definite	CYP2D6	DIPHENYLENEIODONIUM		DTC
CYP2D6	CYP2D6	Definite	CYP2D6	FINASTERIDE		DTC	22931300
CYP2D6	CYP2D6	Definite	CYP2D6	NICOTINE		PharmGKB	26287939|24611668
CYP2D6	CYP2D6	Definite	CYP2D6	LEVOPROPOXYPHENE NAPSYLATE		DTC
CYP2D6	CYP2D6	Definite	CYP2D6	PIPERIDOLATE		DTC
CYP2D6	CYP2D6	Definite	CYP2D6	BEPRIDIL		PharmGKB	16508157
CYP2D6	CYP2D6	Definite	CYP2D6	METHOTREXATE		DTC	22931300
CYP2D6	CYP2D6	Definite	CYP2D6	CHEMBL189724		DTC
CYP2D6	CYP2D6	Definite	CYP2D6	TICLOPIDINE		DTC	22931300
CYP2D6	CYP2D6	Definite	CYP2D6	CHEMBL552439		DTC
CYP2D6	CYP2D6	Definite	CYP2D6	RISPERIDONE		DTC|FDA
CYP2D6	CYP2D6	Definite	CYP2D6	CLORGILINE		DTC
CYP2D6	CYP2D6	Definite	CYP2D6	LEUPROLIDE		DTC	22931300
CYP2D6	CYP2D6	Definite	CYP2D6	ENOXOLONE		DTC	22931300
CYP2D6	CYP2D6	Definite	CYP2D6	IMETIT		DTC
CYP2D6	CYP2D6	Definite	CYP2D6	PRIDINOL METHANESULFONATE		DTC
CYP2D6	CYP2D6	Definite	CYP2D6	MESTRANOL		DTC	22931300
CYP2D6	CYP2D6	Definite	CYP2D6	FLAVOXATE		DTC
CYP2D6	CYP2D6	Definite	CYP2D6	CHEMBL26320		DTC
CYP2D6	CYP2D6	Definite	CYP2D6	OFLOXACIN		DTC	22931300
CYP2D6	CYP2D6	Definite	CYP2D6	CHEMBL1214274		DTC
CYP2D6	CYP2D6	Definite	CYP2D6	BUTACAINE		DTC
CYP2D6	CYP2D6	Definite	CYP2D6	ASPIRIN		DTC|PharmGKB	22931300
CYP2D6	CYP2D6	Definite	CYP2D6	VENLAFAXINE		FDA
CYP2D6	CYP2D6	Definite	CYP2D6	CHEMBL1593717		DTC
CYP2D6	CYP2D6	Definite	CYP2D6	TRACAZOLATE		DTC
CYP2D6	CYP2D6	Definite	CYP2D6	BROMPERIDOL		DTC
CYP2D6	CYP2D6	Definite	CYP2D6	CHEMBL68131		DTC
CYP2D6	CYP2D6	Definite	CYP2D6	DIMETACRINE		DTC
CYP2D6	CYP2D6	Definite	CYP2D6	DIMENHYDRINATE		DTC
CYP2D6	CYP2D6	Definite	CYP2D6	CHEMBL112816		DTC
CYP2D6	CYP2D6	Definite	CYP2D6	CHLORHEXIDINE		DTC
CYP2D6	CYP2D6	Definite	CYP2D6	CHEMBL35482		DTC
CYP2D6	CYP2D6	Definite	CYP2D6	CLEMIZOLE		DTC
CYP2D6	CYP2D6	Definite	CYP2D6	IBUDILAST		DTC
CYP2D6	CYP2D6	Definite	CYP2D6	CHEMBL250428		DTC
CYP2D6	CYP2D6	Definite	CYP2D6	FLUVASTATIN		PharmGKB
CYP2D6	CYP2D6	Definite	CYP2D6	DAPSONE		DTC	22931300
CYP2D6	CYP2D6	Definite	CYP2D6	PROGESTERONE		DTC	22931300
CYP2D6	CYP2D6	Definite	CYP2D6	TRIFLUPERIDOL		DTC
CYP2D6	CYP2D6	Definite	CYP2D6	CP-339818		DTC
CYP2D6	CYP2D6	Definite	CYP2D6	(S)-ALAPROCLATE		DTC
CYP2D6	CYP2D6	Definite	CYP2D6	IOBENGUANE		DTC
CYP2D6	CYP2D6	Definite	CYP2D6	HYPERICIN		NCI	15100173
CYP2D6	CYP2D6	Definite	CYP2D6	ROPINIROLE		DTC
CYP2D6	CYP2D6	Definite	CYP2D6	CIRAZOLINE		DTC
CYP2D6	CYP2D6	Definite	CYP2D6	LANSOPRAZOLE SULFIDE		DTC
CYP2D6	CYP2D6	Definite	CYP2D6	VESAMICOL		DTC
CYP2D6	CYP2D6	Definite	CYP2D6	NAPROXEN		DTC	22931300
CYP2D6	CYP2D6	Definite	CYP2D6	IMAZODAN		DTC
CYP2D6	CYP2D6	Definite	CYP2D6	DILTIAZEM		DTC	22931300
CYP2D6	CYP2D6	Definite	CYP2D6	CHEMBL1256746		DTC
CYP2D6	CYP2D6	Definite	CYP2D6	BUSULFAN		DTC	22931300
CYP2D6	CYP2D6	Definite	CYP2D6	SULFAPHENAZOLE		DTC	22931300
CYP2D6	CYP2D6	Definite	CYP2D6	VALBENAZINE		PharmGKB|FDA
CYP2D6	CYP2D6	Definite	CYP2D6	METHAPHIT		DTC
CYP2D6	CYP2D6	Definite	CYP2D6	CHEMBL455185		DTC
CYP2D6	CYP2D6	Definite	CYP2D6	ARBACLOFEN		DTC
CYP2D6	CYP2D6	Definite	CYP2D6	DIPHENIDOL		DTC
CYP2D6	CYP2D6	Definite	CYP2D6	CHEMBL101510		DTC
CYP2D6	CYP2D6	Definite	CYP2D6	ETICLOPRIDE		DTC
CYP2D6	CYP2D6	Definite	CYP2D6	ANTAZOLINE		DTC
CYP2D6	CYP2D6	Definite	CYP2D6	CARMUSTINE		DTC	22931300
CYP2D6	CYP2D6	Definite	CYP2D6	QUINIDINE		PharmGKB|FDA
CYP2D6	CYP2D6	Definite	CYP2D6	QUININE		PharmGKB
CYP2D6	CYP2D6	Definite	CYP2D6	(-)-PROPANOLOL		DTC
CYP2D6	CYP2D6	Definite	CYP2D6	ERLOTINIB		NCI	17575239
CYP2D6	CYP2D6	Definite	CYP2D6	PIRENZEPINE		DTC
CYP2D6	CYP2D6	Definite	CYP2D6	(S)-PROMETHAZINE		DTC
CYP2D6	CYP2D6	Definite	CYP2D6	GLYBURIDE		DTC
CYP2D6	CYP2D6	Definite	CYP2D6	7-HYDROXYCHLORPROMAZINE		DTC
CYP2D6	CYP2D6	Definite	CYP2D6	RANOLAZINE		PharmGKB
CYP2D6	CYP2D6	Definite	CYP2D6	CHEMBL22778		DTC
CYP2D6	CYP2D6	Definite	CYP2D6	CHEMBL27006		DTC
CYP2D6	CYP2D6	Definite	CYP2D6	DIHYDREXIDINE		DTC
CYP2D6	CYP2D6	Definite	CYP2D6	EMBELIN		DTC
CYP2D6	CYP2D6	Definite	CYP2D6	SPARTEINE		PharmGKB	8563771|8287064|1844820|8946471|10471060|9241659|15618746|8530011|17001296|9089660|9511177|8655150|18784265|7845481|2211621|17460029
CYP2D6	CYP2D6	Definite	CYP2D6	NILUTAMIDE		DTC	22931300
CYP2D6	CYP2D6	Definite	CYP2D6	MENTHOFURAN		DTC	22931300
CYP2D6	CYP2D6	Definite	CYP2D6	GALANGIN		DTC
CYP2D6	CYP2D6	Definite	CYP2D6	ETHYLMORPHINE		PharmGKB
CYP2D6	CYP2D6	Definite	CYP2D6	CHEMBL309760		DTC
CYP2D6	CYP2D6	Definite	CYP2D6	ESOMEPRAZOLE		PharmGKB
CYP2D6	CYP2D6	Definite	CYP2D6	CHEMBL291536		DTC
CYP2D6	CYP2D6	Definite	CYP2D6	CYCLOPHOSPHAMIDE		DTC	22931300
CYP2D6	CYP2D6	Definite	CYP2D6	TESTOSTERONE		DTC	22931300
CYP2D6	CYP2D6	Definite	CYP2D6	OXATOMIDE		DTC
CYP2D6	CYP2D6	Definite	CYP2D6	PROMETHAZINE		PharmGKB	17986163
CYP2D6	CYP2D6	Definite	CYP2D6	SIMVASTATIN		DTC	22931300
CYP2D6	CYP2D6	Definite	CYP2D6	METHANTHELINE		DTC
CYP2D6	CYP2D6	Definite	CYP2D6	DIGOXIN		DTC	22931300
CYP2D6	CYP2D6	Definite	CYP2D6	FELBAMATE		DTC	22931300
CYP2D6	CYP2D6	Definite	CYP2D6	CARBAMAZEPINE		DTC	22931300
CYP2D6	CYP2D6	Definite	CYP2D6	OMEPRAZOLE		DTC	22931300
CYP2D6	CYP2D6	Definite	CYP2D6	KENPAULLONE		DTC
CYP2D6	CYP2D6	Definite	CYP2D6	CHEMBL389390		DTC
CYP2D6	CYP2D6	Definite	CYP2D6	CYCLOSPORINE		DTC	22931300
CYP2D6	CYP2D6	Definite	CYP2D6	COUMARIN		DTC	22931300
CYP2D6	CYP2D6	Definite	CYP2D6	ONDANSETRON		FDA
CYP2D6	CYP2D6	Definite	CYP2D6	CHEMBL244707		DTC
CYP2D6	CYP2D6	Definite	CYP2D6	PYRIDOSTIGMINE		DTC	22931300
CYP2D6	CYP2D6	Definite	CYP2D6	RIFAMPIN		DTC	22931300
CYP2D6	CYP2D6	Definite	CYP2D6	MIANSERIN		PharmGKB	14652703|1527229|8062494|9408809
CYP2D6	CYP2D6	Definite	CYP2D6	FLUPHENAZINE		DTC|PharmGKB
CYP2D6	CYP2D6	Definite	CYP2D6	MECAMYLAMINE		DTC	22931300
CYP2D6	CYP2D6	Definite	CYP2D6	NEOSTIGMINE BROMIDE		DTC	22931300
CYP2D6	CYP2D6	Definite	CYP2D6	EBSELEN		DTC
CYP2D6	CYP2D6	Definite	CYP2D6	DENATONIUM BENZOATE		DTC
CYP2D6	CYP2D6	Definite	CYP2D6	LIDOFLAZINE		DTC
CYP2D6	CYP2D6	Definite	CYP2D6	CHEMBL546597		DTC
CYP2D6	CYP2D6	Definite	CYP2D6	ETIDRONIC ACID		DTC	22931300
CYP2D6	CYP2D6	Definite	CYP2D6	FERROUS SULFATE		DTC	22931300
CYP2D6	CYP2D6	Definite	CYP2D6	PROADIFEN		DTC
CYP2D6	CYP2D6	Definite	CYP2D6	TROGLITAZONE		DTC	22931300
CYP2D6	CYP2D6	Definite	CYP2D6	4',7-DIMETHOXY-5-HYDROXYGENISTEIN		DTC
CYP2D6	CYP2D6	Definite	CYP2D6	DACARBAZINE		DTC	22931300
CYP2D6	CYP2D6	Definite	CYP2D6	CHEMBL279556		DTC
CYP2D6	CYP2D6	Definite	CYP2D6	TRIAMCINOLONE		DTC	22931300
CYP2D6	CYP2D6	Definite	CYP2D6	CHEMBL1520837		DTC
CYP2D6	CYP2D6	Definite	CYP2D6	CHEMBL277525		DTC
CYP2D6	CYP2D6	Definite	CYP2D6	CHEMBL338115		DTC
CYP2D6	CYP2D6	Definite	CYP2D6	ESTRADIOL		DTC	22931300
CYP2D6	CYP2D6	Definite	CYP2D6	NIGULDIPINE		DTC
CYP2D6	CYP2D6	Definite	CYP2D6	CLOPIDOGREL		DTC
CYP2D6	CYP2D6	Definite	CYP2D6	NIFEDIPINE		DTC	22931300
CYP2D6	CYP2D6	Definite	CYP2D6	ARASERTACONAZOLE		DTC
CYP2D6	CYP2D6	Definite	CYP2D6	CHEMBL1371696		DTC
CYP2D6	CYP2D6	Definite	CYP2D6	TROPISETRON		PharmGKB	12728290|12065557
CYP2D6	CYP2D6	Definite	CYP2D6	NALBUPHINE		DTC	22931300
CYP2D6	CYP2D6	Definite	CYP2D6	HARMAN		DTC
CYP2D6	CYP2D6	Definite	CYP2D6	DACTINOMYCIN		DTC	22931300
CYP2D6	CYP2D6	Definite	CYP2D6	BUCLADESINE		DTC
CYP2D6	CYP2D6	Definite	CYP2D6	PSORALEN		DTC
CYP2D6	CYP2D6	Definite	CYP2D6	DANAZOL		DTC	22931300
CYP2D6	CYP2D6	Definite	CYP2D6	PIROXICAM		DTC	22931300
CYP2D6	CYP2D6	Definite	CYP2D6	NIMESULIDE		DTC	22931300
CYP2D6	CYP2D6	Definite	CYP2D6	CLOZAPINE		FDA
CYP2D6	CYP2D6	Definite	CYP2D6	TRAMADOL		FDA
CYP2D6	CYP2D6	Definite	CYP2D6	LAMOTRIGINE		DTC	22931300
CYP2D6	CYP2D6	Definite	CYP2D6	AMPHOTERICIN B		DTC	22931300
CYP2D6	CYP2D6	Definite	CYP2D6	BERGAMOTTIN		DTC
CYP2D6	CYP2D6	Definite	CYP2D6	SB-202190		DTC
CYP2D6	CYP2D6	Definite	CYP2D6	SPICLOMAZINE		DTC
CYP2D6	CYP2D6	Definite	CYP2D6	MIBEFRADIL		DTC
CYP2D6	CYP2D6	Definite	CYP2D6	CEFOPERAZONE		DTC	22931300
CYP2D6	CYP2D6	Definite	CYP2D6	XYLOMETAZOLINE		DTC
CYP2D6	CYP2D6	Definite	CYP2D6	E324		DTC
CYP2D6	CYP2D6	Definite	CYP2D6	MENADIONE		DTC
CYP2D6	CYP2D6	Definite	CYP2D6	LIOTHYRONINE		DTC	22931300
CYP2D6	CYP2D6	Definite	CYP2D6	FLUPIRTINE		DTC
CYP2D6	CYP2D6	Definite	CYP2D6	MINOXIDIL		DTC	22931300
CYP2D6	CYP2D6	Definite	CYP2D6	CARBETAPENTANE CITRATE		DTC
CYP2D6	CYP2D6	Definite	CYP2D6	BENZYDAMINE		DTC
CYP2D6	CYP2D6	Definite	CYP2D6	CHEMBL585045		DTC
CYP2D6	CYP2D6	Definite	CYP2D6	CHEMBL188641		DTC
CYP2D6	CYP2D6	Definite	CYP2D6	IPRONIAZID		DTC	22931300
CYP2D6	CYP2D6	Definite	CYP2D6	ESCITALOPRAM		FDA
NDUFAF2	NDUFAF2	Definite	NDUFAF2	METFORMIN HYDROCHLORIDE	inhibitor	ChemblInteractions
NDUFAF2	NDUFAF2	Definite	NDUFAF2	NV-128	inhibitor	ChemblInteractions
NDUFAF2	NDUFAF2	Definite	NDUFAF2	ME-344	inhibitor	ChemblInteractions
KLC1	KLC1	Definite	KLC1	FLUOROURACIL		PharmGKB	17549067
KLC1	KLC1	Definite	KLC1	LEUCOVORIN		PharmGKB	17549067
KLC1	KLC1	Definite	KLC1	IRINOTECAN		PharmGKB	17549067
ADO	ADO	Definite	ADO	HYDROCHLOROTHIAZIDE		PharmGKB	31327267
LPAR2	LPAR2	Definite	LPAR2	CAFFEINE		NCI	10199823
LPAR2	LPAR2	Definite	LPAR2	MORPHINE		NCI	17090705
LPAR2	LPAR2	Definite	LPAR2	OCTREOTIDE		NCI	18624922
NTSR1	NTSR1	Definite	NTSR1	REMINERTANT	antagonist	ChemblInteractions|GuideToPharmacology|TTD
NTSR1	NTSR1	Definite	NTSR1	CHEMBL532160		DTC
NTSR1	NTSR1	Definite	NTSR1	CHEMBL493863		DTC
NTSR1	NTSR1	Definite	NTSR1	THIMEROSAL		DTC
NTSR1	NTSR1	Definite	NTSR1	NEUROTENSIN	agonist	GuideToPharmacology
NTSR1	NTSR1	Definite	NTSR1	SORAFENIB TOSYLATE		DTC
NTSR1	NTSR1	Definite	NTSR1	CHEMBL548458		DTC
UGGT2	UGGT2	Definite	UGGT2	HYDROCHLOROTHIAZIDE		PharmGKB
DRD2	DRD2	Definite	DRD2	ASENAPINE	antagonist	TdgClinicalTrial|TEND|GuideToPharmacology	21658377|18308814|21655346
DRD2	DRD2	Definite	DRD2	OLANZAPINE	agonist|antagonist	TdgClinicalTrial|ChemblInteractions|TEND|GuideToPharmacology|PharmGKB|TTD	22967772|9713903|20714340|15694263|14575800|28673279|23859574|18180754|16730699|11505224|17092971|17105675|17316700|18926547|16123753|11920858|991813|14610521|17848919|17067304|18086475|18579277|20375926|25563748|11752352|9858029|15830237|25032030|26872113|17767146|16513877|23851570|20194480|9918131|21095016
DRD2	DRD2	Definite	DRD2	ASENAPINE MALEATE	antagonist	ChemblInteractions
DRD2	DRD2	Definite	DRD2	CLOZAPINE	antagonist	DTC|TdgClinicalTrial|ChemblInteractions|NCI|TEND|GuideToPharmacology|PharmGKB	9713903|15781964|20714340|15694263|14575800|28673279|23859574|18180754|11505224|17105675|15286066|18926547|16123753|11920858|21421319|991813|14610521|12769622|18086475|18579277|20375926|11752352|9858029|15830237|26872113|17767146|16513877|16040180|23851570|20194480|9918131|12887421
DRD2	DRD2	Definite	DRD2	ROPINIROLE	agonist	TdgClinicalTrial|TEND|GuideToPharmacology|PharmGKB|TTD	19557097|10446316|18691132|10641988|18808942|11752352|17573046|1683559
DRD2	DRD2	Definite	DRD2	SERTINDOLE	antagonist	TdgClinicalTrial|TEND|GuideToPharmacology	16925508|19506838|11752352|18293356|20856607
DRD2	DRD2	Definite	DRD2	SULPIRIDE	antagonist	DTC|TdgClinicalTrial|TEND|GuideToPharmacology|TTD	22632094|7518029|12010185|11752352
DRD2	DRD2	Definite	DRD2	BIFEPRUNOX	partial agonist	TdgClinicalTrial|ChemblInteractions	17393144|17659474
DRD2	DRD2	Definite	DRD2	REMOXIPRIDE	antagonist	TdgClinicalTrial|TEND	8665533|11873706|11752352
DRD2	DRD2	Definite	DRD2	DAPIPRAZOLE		TTD
DRD2	DRD2	Definite	DRD2	LUMATEPERONE	partial agonist|antagonist	TdgClinicalTrial|ChemblInteractions|GuideToPharmacology	30596390
DRD2	DRD2	Definite	DRD2	ILOPERIDONE	antagonist	TdgClinicalTrial|ChemblInteractions|TEND|TTD	12861482|8997630
DRD2	DRD2	Definite	DRD2	CARPHENAZINE	antagonist	TdgClinicalTrial|TEND|TTD	4887393|4889058|11752352|4861216
DRD2	DRD2	Definite	DRD2	PERGOLIDE	agonist	TdgClinicalTrial|TEND|GuideToPharmacology|PharmGKB|TTD	16842172|2860228|18691132|3828803|1674528|10641988|18808942|11752352|10516878
DRD2	DRD2	Definite	DRD2	ARIPIPRAZOLE	antagonist|partial agonist|agonist	TdgClinicalTrial|ChemblInteractions|TEND|GuideToPharmacology|PharmGKB|TTD	9713903|15694263|28673279|16973280|11505224|17105675|9083792|18926547|16123753|11920858|991813|14610521|16925992|16981227|18583979|19158809|19900188|10327430|11752352|16366516|9858029|15830237|16513877|18687376|20194480|17501690|9918131|15567074|17087792|19582781|26346901
DRD2	DRD2	Definite	DRD2	MEPHENTERMINE		TTD
DRD2	DRD2	Definite	DRD2	PHENOXYBENZAMINE		TTD
DRD2	DRD2	Definite	DRD2	LEVODOPA	agonist	TdgClinicalTrial|TEND|PharmGKB|TTD	11978145|18549347|15824260|15710490|17553470|27779245|15728856|9633680
DRD2	DRD2	Definite	DRD2	METOCLOPRAMIDE	antagonist	TdgClinicalTrial|TEND|TTD	21585331|8230103|15835479|8981558|11752352|9876882|8730709|7745844
DRD2	DRD2	Definite	DRD2	PROCHLORPERAZINE	antagonist	TdgClinicalTrial|ChemblInteractions|TEND|GuideToPharmacology|PharmGKB|TTD	17044574|2527092|17169748|18955042|18534808|11752352|24360851|16677982
DRD2	DRD2	Definite	DRD2	FLUPENTIXOL	antagonist	DTC|GuideToPharmacology	6149133|8797192|21421319|1674528|11873706|7498321|17111172|11752352
DRD2	DRD2	Definite	DRD2	HALOPERIDOL	antagonist|inverse agonist	DTC|TdgClinicalTrial|ChemblInteractions|NCI|TEND|GuideToPharmacology|PharmGKB|TTD	15894081|15184239|19603545|15492764|18180754|27023437|16730699|15286066|10823405|18855532|17316700|18926547|18781856|17134027|12587665|11329406|21421319|1839129|19179847|19944883|1969501|18086475|7520908|10395223|18781857|15077009|11752352|17989061|15830237|17767146|18354387|9672901|19396436|12629531|15146457|19273465|19853839|10862524|12887421|19373123|20643630|16132064
DRD2	DRD2	Definite	DRD2	SUMANIROLE	agonist	GuideToPharmacology|TTD
DRD2	DRD2	Definite	DRD2	PEROSPIRONE	antagonist	GuideToPharmacology	9595296
DRD2	DRD2	Definite	DRD2	ROTIGOTINE	agonist	TdgClinicalTrial|ChemblInteractions|TEND|GuideToPharmacology	18691132
DRD2	DRD2	Definite	DRD2	CHLORPROMAZINE	antagonist	ChemblInteractions|GuideToPharmacology|PharmGKB|TTD	7908055|15694263|28673279|11505224|17105675|18926547|16867246|11873706|11103886|11752352|9858029|15830237|16513877|8524985|20194480|9918131|20643630
DRD2	DRD2	Definite	DRD2	QUETIAPINE	antagonist	DTC|TdgClinicalTrial|TEND|GuideToPharmacology|TTD	21421319|17848919|11132243|11873706|10839333|11752352
DRD2	DRD2	Definite	DRD2	AMPHETAMINE	binder	PharmGKB	1532675
DRD2	DRD2	Definite	DRD2	ACETOPHENAZINE	antagonist	TdgClinicalTrial|TEND|TTD	6147851|11873706|11752352|17139284|17016423
DRD2	DRD2	Definite	DRD2	ALCOHOL		NCI|PharmGKB	1839129|12749054|1969501|1979357|27447243|10490697|8033754|17989061|22798433|11054774|29236941
DRD2	DRD2	Definite	DRD2	ZIPRASIDONE HYDROCHLORIDE	antagonist	ChemblInteractions
DRD2	DRD2	Definite	DRD2	DIACETYLMORPHINE		PharmGKB
DRD2	DRD2	Definite	DRD2	PRAMIPEXOLE	agonist	TdgClinicalTrial|TEND|GuideToPharmacology|TTD	22023785|9617505|18691132|10641988|9638397|11752352
DRD2	DRD2	Definite	DRD2	AMISULPRIDE	antagonist	TdgClinicalTrial|TEND|GuideToPharmacology|PharmGKB|TTD	12404702|11873706|25679126|16696579
DRD2	DRD2	Definite	DRD2	ROXINDOLE	agonist|antagonist	GuideToPharmacology|TTD
DRD2	DRD2	Definite	DRD2	LOXAPINE	antagonist	TdgClinicalTrial|ChemblInteractions|TEND|GuideToPharmacology|TTD	9570468|8665533|9342550|8101879|11752352|6239298|15694653
DRD2	DRD2	Definite	DRD2	DOPAMINE	agonist	GuideToPharmacology|TTD	17301410|11752352
DRD2	DRD2	Definite	DRD2	LISURIDE	agonist	TdgClinicalTrial|TEND|GuideToPharmacology|TTD	18691132|11752352
DRD2	DRD2	Definite	DRD2	ANIRACETAM		TTD	11412837
DRD2	DRD2	Definite	DRD2	TRIFLUPROMAZINE	antagonist	TdgClinicalTrial|ChemblInteractions|TEND	239169|30137788|17139284|9081563|17016423
DRD2	DRD2	Definite	DRD2	DOMPERIDONE	antagonist	TdgClinicalTrial|TEND|GuideToPharmacology|TTD	15894081|18970411|12010185|11752352|1683559
DRD2	DRD2	Definite	DRD2	PERPHENAZINE	antagonist	TdgClinicalTrial|ChemblInteractions|TEND|GuideToPharmacology|TTD	2573104|7508675|11873706|11752352|15007534|7828655
DRD2	DRD2	Definite	DRD2	CARPHENAZINE MALEATE	antagonist	ChemblInteractions
DRD2	DRD2	Definite	DRD2	MOLINDONE	antagonist	TdgClinicalTrial|TEND|TTD	9342550|9577836|11752352|9353417|17016423
DRD2	DRD2	Definite	DRD2	MINAPRINE	agonist	TdgClinicalTrial|TEND	7862862|17139284|17016423
DRD2	DRD2	Definite	DRD2	COCAINE		PharmGKB
DRD2	DRD2	Definite	DRD2	FLUPHENAZINE DECANOATE	antagonist	ChemblInteractions
DRD2	DRD2	Definite	DRD2	BREXPIPRAZOLE	agonist|partial agonist	TdgClinicalTrial|ChemblInteractions|GuideToPharmacology|TTD	24947465
DRD2	DRD2	Definite	DRD2	ZIPRASIDONE	antagonist	TdgClinicalTrial|TEND|GuideToPharmacology|TTD	15726024|17848919|7562537|11873706|11752352|14728084
DRD2	DRD2	Definite	DRD2	METARAMINOL		TTD
DRD2	DRD2	Definite	DRD2	CARMOXIROLE		TTD
DRD2	DRD2	Definite	DRD2	APOMORPHINE	agonist	TdgClinicalTrial|TEND|GuideToPharmacology|TTD	11343576|15037665|10494453|18691132|11215397|10641988|11752352|11212866|11692072
DRD2	DRD2	Definite	DRD2	CABERGOLINE	agonist	TdgClinicalTrial|ChemblInteractions|TEND|GuideToPharmacology|PharmGKB|TTD	12721865|18303487|8951172|12008749|12464354|18808942|15341508|11436517|11752352
DRD2	DRD2	Definite	DRD2	THIETHYLPERAZINE	antagonist	TdgClinicalTrial|TEND|TTD	15469457|17139284|17016423
DRD2	DRD2	Definite	DRD2	VILAZODONE	agonist	GuideToPharmacology
DRD2	DRD2	Definite	DRD2	CARIPRAZINE	partial agonist|agonist	TdgClinicalTrial|GuideToPharmacology|TTD	23320989
DRD2	DRD2	Definite	DRD2	FLUPHENAZINE ENANTHATE	antagonist	ChemblInteractions
DRD2	DRD2	Definite	DRD2	ORDOPIDINE	modulator	ChemblInteractions
DRD2	DRD2	Definite	DRD2	LURASIDONE HYDROCHLORIDE	antagonist	ChemblInteractions
DRD2	DRD2	Definite	DRD2	QUINPIROLE	agonist	DTC|GuideToPharmacology	21536445|21388142|26164842|21999579|25969169
DRD2	DRD2	Definite	DRD2	METHYLPHENIDATE		PharmGKB	26810137
DRD2	DRD2	Definite	DRD2	PALIPERIDONE	antagonist	TdgClinicalTrial|ChemblInteractions|TEND	11132243|12211096|11752352|7524043|16119512|7531353|16513859
DRD2	DRD2	Definite	DRD2	PARDOPRUNOX	partial agonist	TdgClinicalTrial|ChemblInteractions|TTD
DRD2	DRD2	Definite	DRD2	TRIMIPRAMINE MALEATE	antagonist	ChemblInteractions
DRD2	DRD2	Definite	DRD2	TIAPRIDE	blocker	TTD	11520476
DRD2	DRD2	Definite	DRD2	BUSPIRONE	antagonist	TdgClinicalTrial|TEND	16214127|14522358|12781354|11421254|11224194
DRD2	DRD2	Definite	DRD2	FLUPHENAZINE	antagonist	TdgClinicalTrial|TEND|GuideToPharmacology	7508675|11873706|11752352|7828655
DRD2	DRD2	Definite	DRD2	ROPINIROLE HYDROCHLORIDE	agonist	ChemblInteractions
DRD2	DRD2	Definite	DRD2	PIMOZIDE	antagonist	TdgClinicalTrial|ChemblInteractions|TEND|GuideToPharmacology|TTD	8301582|7855217|8082693|11873706|10503726|11752352|2378927|12828573
DRD2	DRD2	Definite	DRD2	TRIFLUOPERAZINE	antagonist	TdgClinicalTrial|TEND|GuideToPharmacology	8102973|1676523|11873706|11752352|15695070|945467
DRD2	DRD2	Definite	DRD2	BEVANTOLOL		TTD
DRD2	DRD2	Definite	DRD2	NAPHAZOLINE		TTD
DRD2	DRD2	Definite	DRD2	ONC-201		TTD
DRD2	DRD2	Definite	DRD2	MELEVODOPA		TdgClinicalTrial
DRD2	DRD2	Definite	DRD2	STEPHOLIDINE		DTC	19744859
DRD2	DRD2	Definite	DRD2	RISPERIDONE	antagonist	DTC|TdgClinicalTrial|ChemblInteractions|TEND|GuideToPharmacology|PharmGKB|TTD	15184239|9713903|20714340|19603545|15694263|28673279|23859574|15492764|18180754|17059881|16730699|11505224|17105675|15286066|10823405|18855532|18926547|16123753|18781856|11920858|12587665|11329406|21421319|991813|14610521|1839129|11132243|19179847|19944883|1969501|18086475|18579277|10395223|20375926|18781857|15077009|11752352|17989061|9858029|15830237|25943458|26872113|17767146|15140279|16513877|…
DRD2	DRD2	Definite	DRD2	ABAPERIDONE		TTD
DRD2	DRD2	Definite	DRD2	PERGOLIDE MESYLATE	agonist	ChemblInteractions
DRD2	DRD2	Definite	DRD2	CHLORPROTHIXENE	antagonist	TdgClinicalTrial|ChemblInteractions|TEND|TTD	1830565|19091563|8101879|11752352
DRD2	DRD2	Definite	DRD2	MESORIDAZINE	antagonist	TdgClinicalTrial|TEND|GuideToPharmacology|TTD	15357957|11752352|16135699
DRD2	DRD2	Definite	DRD2	OCAPERIDONE		TTD	10592235
DRD2	DRD2	Definite	DRD2	ERGONOVINE		TTD
DRD2	DRD2	Definite	DRD2	THIORIDAZINE HYDROCHLORIDE	antagonist	ChemblInteractions
DRD2	DRD2	Definite	DRD2	APOMORPHINE HYDROCHLORIDE	agonist	ChemblInteractions
DRD2	DRD2	Definite	DRD2	ZUCLOPENTHIXOL	antagonist	TdgClinicalTrial|TEND|TTD	17535043|11752352|8748043|1822319
DRD2	DRD2	Definite	DRD2	PIPERACETAZINE		TTD
DRD2	DRD2	Definite	DRD2	LOXAPINE HYDROCHLORIDE	antagonist	ChemblInteractions
DRD2	DRD2	Definite	DRD2	PHENYLEPHRINE		TTD
DRD2	DRD2	Definite	DRD2	THIORIDAZINE	antagonist	TdgClinicalTrial|ChemblInteractions|TEND|TTD	7689973|9292626|1978482|16434058|1352051
DRD2	DRD2	Definite	DRD2	AMOXAPINE	antagonist	ChemblInteractions	1966571|11180191
DRD2	DRD2	Definite	DRD2	SARIZOTAN	partial agonist	TTD	14767715
DRD2	DRD2	Definite	DRD2	CARIPRAZINE HYDROCHLORIDE	modulator	ChemblInteractions
DRD2	DRD2	Definite	DRD2	PIPOTIAZINE	antagonist	GuideToPharmacology	15694263|2875894|16867246|11873706|11103886|11752352|20643630
DRD2	DRD2	Definite	DRD2	LURASIDONE	antagonist	TdgClinicalTrial|TEND	23545936
DRD2	DRD2	Definite	DRD2	FLUSPIRILENE	antagonist	TdgClinicalTrial|TEND|TTD	8935801|11752352|17139284|11842444|17016423
DRD2	DRD2	Definite	DRD2	THIETHYLPERAZINE MALATE	antagonist	ChemblInteractions
DRD2	DRD2	Definite	DRD2	METOCLOPRAMIDE HYDROCHLORIDE	antagonist	ChemblInteractions
DRD2	DRD2	Definite	DRD2	HALOPERIDOL LACTATE	inverse agonist	ChemblInteractions
DRD2	DRD2	Definite	DRD2	EPHEDRINE		TTD
DRD2	DRD2	Definite	DRD2	5-OH-DPAT		DTC	3783613
DRD2	DRD2	Definite	DRD2	PHENYLTOLOXAMINE		TTD
DRD2	DRD2	Definite	DRD2	METHADONE		PharmGKB	21902500|23651024|18687376|19373123|25556837
DRD2	DRD2	Definite	DRD2	THIOTHIXENE HYDROCHLORIDE	antagonist	ChemblInteractions
DRD2	DRD2	Definite	DRD2	NAFADOTRIDE	antagonist	GuideToPharmacology
DRD2	DRD2	Definite	DRD2	TERGURIDE	agonist|antagonist	GuideToPharmacology
DRD2	DRD2	Definite	DRD2	LEVOMEPROMAZINE	antagonist	ChemblInteractions|TTD	2870716|15701205|10592235
DRD2	DRD2	Definite	DRD2	PRAMIPEXOLE DIHYDROCHLORIDE	agonist	ChemblInteractions
DRD2	DRD2	Definite	DRD2	PRIDOPIDINE	modulator	TdgClinicalTrial|ChemblInteractions|TTD
DRD2	DRD2	Definite	DRD2	DROPERIDOL	antagonist	TdgClinicalTrial|ChemblInteractions|TEND|TTD	2527092|1549935|14633536|20358234
DRD2	DRD2	Definite	DRD2	PROCHLORPERAZINE EDISYLATE	antagonist	ChemblInteractions
DRD2	DRD2	Definite	DRD2	TOLAZOLINE		TTD
DRD2	DRD2	Definite	DRD2	BROMOCRIPTINE MESYLATE	agonist	ChemblInteractions
DRD2	DRD2	Definite	DRD2	MESORIDAZINE BESYLATE	antagonist	ChemblInteractions
DRD2	DRD2	Definite	DRD2	ETICLOPRIDE	antagonist	GuideToPharmacology
DRD2	DRD2	Definite	DRD2	APLINDORE FUMARATE	partial agonist	ChemblInteractions
DRD2	DRD2	Definite	DRD2	PIRIBEDIL	agonist	GuideToPharmacology	10728880
DRD2	DRD2	Definite	DRD2	PROCHLORPERAZINE MALEATE	antagonist	ChemblInteractions
DRD2	DRD2	Definite	DRD2	ITOPRIDE		TdgClinicalTrial	16495395|17300287
DRD2	DRD2	Definite	DRD2	BLONANSERIN	antagonist	GuideToPharmacology|TTD	20030420
DRD2	DRD2	Definite	DRD2	BENPERIDOL	antagonist	GuideToPharmacology
DRD2	DRD2	Definite	DRD2	PROPIOMAZINE	antagonist	TdgClinicalTrial|TEND	19110200|18471899|17139284|17016423|22507664
DRD2	DRD2	Definite	DRD2	PHENTOLAMINE		TTD
DRD2	DRD2	Definite	DRD2	E-FLUPENTIXOL		TdgClinicalTrial|TEND
DRD2	DRD2	Definite	DRD2	MORPHINE		NCI	11943831
DRD2	DRD2	Definite	DRD2	PERAZINE		TTD
DRD2	DRD2	Definite	DRD2	ETILEVODOPA		TdgClinicalTrial
DRD2	DRD2	Definite	DRD2	BROMOCRIPTINE	agonist	TdgClinicalTrial|TEND|GuideToPharmacology|TTD	18691132|11444429|10641988|10721819|12010185|11752352|12753422|10626749
DRD2	DRD2	Definite	DRD2	NICOTINE		PharmGKB	16123753|15203796
DRD2	DRD2	Definite	DRD2	PROMAZINE	antagonist	TdgClinicalTrial|TEND|GuideToPharmacology	19110200|18471899|17139284|17016423
DRD2	DRD2	Definite	DRD2	ERGOLOID MESYLATES	agonist	ChemblInteractions
DRD2	DRD2	Definite	DRD2	NEMONAPRIDE		PharmGKB|TTD	15184239|19603545|15694263|28673279|15492764|18180754|11505224|17105675|15286066|10823405|18855532|18926547|18781856|12587665|11329406|1839129|19179847|19944883|1969501|18086475|10395223|18781857|15077009|17989061|9858029|15830237|17767146|16513877|18354387|9672901|19396436|15146457|19273465|19853839|20194480|10862524|9918131|19373123
DRD2	DRD2	Definite	DRD2	BENZQUINAMIDE	agonist	GuideToPharmacology
DRD2	DRD2	Definite	DRD2	ZOTEPINE	antagonist	GuideToPharmacology	23427194
DRD2	DRD2	Definite	DRD2	ACETOPHENAZINE MALEATE	antagonist	ChemblInteractions
DRD2	DRD2	Definite	DRD2	RISPERDAL		TdgClinicalTrial
DRD2	DRD2	Definite	DRD2	THIOTHIXENE	antagonist	ChemblInteractions|TTD	15694263|3039860|16867246|11873706|11103886|11752352|20643630
DRD2	DRD2	Definite	DRD2	DOPEXAMINE		TTD
DRD2	DRD2	Definite	DRD2	OLANZAPINE PAMOATE	antagonist	ChemblInteractions
DRD2	DRD2	Definite	DRD2	DIHYDROERGOTAMINE		TTD
DRD2	DRD2	Definite	DRD2	TALIPEXOLE		TTD
DRD2	DRD2	Definite	DRD2	LITHIUM		NCI	8787189
DRD2	DRD2	Definite	DRD2	DENOPAMINE		TTD
DRD2	DRD2	Definite	DRD2	DEXPRAMIPEXOLE		TdgClinicalTrial
DRD2	DRD2	Definite	DRD2	BENZQUINAMIDE HYDROCHLORIDE	modulator	ChemblInteractions
DRD2	DRD2	Definite	DRD2	ZICRONAPINE		TTD
DRD2	DRD2	Definite	DRD2	RASAGILINE		PharmGKB	27190009
DRD2	DRD2	Definite	DRD2	QUINELORANE	agonist	GuideToPharmacology
DRD2	DRD2	Definite	DRD2	APLINDORE		TdgClinicalTrial
DRD2	DRD2	Definite	DRD2	BL-1020		TTD
DRD2	DRD2	Definite	DRD2	SARIZOTAN HYDROCHLORIDE	partial agonist	ChemblInteractions
DRD2	DRD2	Definite	DRD2	THIETHYLPERAZINE MALEATE	antagonist	ChemblInteractions
DRD2	DRD2	Definite	DRD2	METHAMPHETAMINE		TTD
DRD2	DRD2	Definite	DRD2	SUMATRIPTAN		PharmGKB	25096645
DRD2	DRD2	Definite	DRD2	LOXAPINE SUCCINATE	antagonist	ChemblInteractions
DRD2	DRD2	Definite	DRD2	FLUPHENAZINE HYDROCHLORIDE	antagonist	ChemblInteractions
DRD2	DRD2	Definite	DRD2	JNJ-37822681	antagonist	TdgClinicalTrial|TTD	22490380
DRD2	DRD2	Definite	DRD2	SERIDOPIDINE	modulator	ChemblInteractions
DRD2	DRD2	Definite	DRD2	TRIFLUPROMAZINE HYDROCHLORIDE	antagonist	ChemblInteractions
DRD2	DRD2	Definite	DRD2	MOLINDONE HYDROCHLORIDE	antagonist	ChemblInteractions
DRD2	DRD2	Definite	DRD2	UMESPIRONE		TTD
DRD2	DRD2	Definite	DRD2	ARIPIPRAZOLE LAUROXIL	partial agonist	ChemblInteractions
DRD2	DRD2	Definite	DRD2	HALOPERIDOL DECANOATE	inverse agonist	ChemblInteractions
DRD2	DRD2	Definite	DRD2	SB-773812	antagonist	ChemblInteractions
DRD2	DRD2	Definite	DRD2	DISULFIRAM		PharmGKB	23635803
DRD2	DRD2	Definite	DRD2	QUETIAPINE FUMARATE	antagonist	ChemblInteractions
DRD2	DRD2	Definite	DRD2	QUINAGOLIDE	agonist	TTD
DRD2	DRD2	Definite	DRD2	BUPROPION		PharmGKB	15184239|19603545|15492764|18180754|15286066|10823405|18855532|18926547|16123753|18781856|12587665|11329406|1839129|19179847|19944883|1969501|18086475|10395223|18781857|15077009|17989061|15830237|17767146|18354387|9672901|19396436|15146457|19273465|19853839|10862524|19373123
DRD2	DRD2	Definite	DRD2	TRIFLUOPERAZINE HYDROCHLORIDE	antagonist	ChemblInteractions
DRD2	DRD2	Definite	DRD2	ZIPRASIDONE MESYLATE	antagonist	ChemblInteractions
DRD2	DRD2	Definite	DRD2	DOCARPAMINE		TTD
DRD2	DRD2	Definite	DRD2	METHYLDOPA		TTD
DRD2	DRD2	Definite	DRD2	CHLORPROMAZINE HYDROCHLORIDE	antagonist	ChemblInteractions
DRD2	DRD2	Definite	DRD2	PROMAZINE HYDROCHLORIDE	antagonist	ChemblInteractions
DRD2	DRD2	Definite	DRD2	DIHYDREXIDINE		DTC	19744859
DRD2	DRD2	Definite	DRD2	PSEUDOEPHEDRINE		TTD
DRD2	DRD2	Definite	DRD2	RACLOPRIDE	antagonist	GuideToPharmacology	15010698
DRD2	DRD2	Definite	DRD2	BROMPERIDOL		PharmGKB	15694263|28673279|11505224|17105675|18926547|9858029|15830237|16513877|20194480|9918131
CACNA1C	CACNA1C	Definite	CACNA1C	VERAPAMIL	inhibitor|blocker	TdgClinicalTrial|TEND|GuideToPharmacology|PharmGKB	15880143|19125880|9846638|20031608|15286207
CACNA1C	CACNA1C	Definite	CACNA1C	NICARDIPINE	inhibitor	TdgClinicalTrial|TEND	11752352
CACNA1C	CACNA1C	Definite	CACNA1C	AMLODIPINE BESYLATE	blocker	ChemblInteractions
CACNA1C	CACNA1C	Definite	CACNA1C	ALCOHOL		PharmGKB	31634677|12970385
CACNA1C	CACNA1C	Definite	CACNA1C	ELPETRIGINE	blocker	ChemblInteractions
CACNA1C	CACNA1C	Definite	CACNA1C	BENIDIPINE	antagonist|blocker	GuideToPharmacology	16565579
CACNA1C	CACNA1C	Definite	CACNA1C	IMAGABALIN	modulator	ChemblInteractions
CACNA1C	CACNA1C	Definite	CACNA1C	ISRADIPINE	inhibitor|blocker	TdgClinicalTrial|ChemblInteractions|TEND|GuideToPharmacology	12135765|10766758|9607315
CACNA1C	CACNA1C	Definite	CACNA1C	CLEVIDIPINE	blocker	TdgClinicalTrial|ChemblInteractions	15492770
CACNA1C	CACNA1C	Definite	CACNA1C	NIFEDIPINE	inhibitor|blocker	ChemblInteractions	19029287|9846638|11752352
CACNA1C	CACNA1C	Definite	CACNA1C	FELODIPINE	blocker|inhibitor	TdgClinicalTrial|ChemblInteractions	10525060|17475903|11752352
CACNA1C	CACNA1C	Definite	CACNA1C	ATAGABALIN	modulator	ChemblInteractions
CACNA1C	CACNA1C	Definite	CACNA1C	NIMODIPINE	blocker|inhibitor	ChemblInteractions|PharmGKB	20661350|17705883|20335610|20334460|11752352|19205682|19844625|8731425
CACNA1C	CACNA1C	Definite	CACNA1C	RITODRINE		PharmGKB	28391406
CACNA1C	CACNA1C	Definite	CACNA1C	VERAPAMIL HYDROCHLORIDE	blocker	ChemblInteractions
CACNA1C	CACNA1C	Definite	CACNA1C	NISOLDIPINE	blocker|inhibitor	ChemblInteractions|GuideToPharmacology	7592963|9584217|9846638|11752352
CACNA1C	CACNA1C	Definite	CACNA1C	HALOPERIDOL		PharmGKB	27023437
CACNA1C	CACNA1C	Definite	CACNA1C	MIBEFRADIL	inhibitor|blocker	GuideToPharmacology	10665814|10372226|16306443|16899990
CACNA1C	CACNA1C	Definite	CACNA1C	IBUTILIDE	activator	TdgClinicalTrial|TEND	9257085|15926871|11752352
CACNA1C	CACNA1C	Definite	CACNA1C	AMLODIPINE	inhibitor	TdgClinicalTrial	27556947|11752352|16322774
CACNA1C	CACNA1C	Definite	CACNA1C	DILTIAZEM HYDROCHLORIDE	blocker	ChemblInteractions
CACNA1C	CACNA1C	Definite	CACNA1C	DILTIAZEM	blocker	GuideToPharmacology	10226758
CACNA1C	CACNA1C	Definite	CACNA1C	BEPRIDIL HYDROCHLORIDE	blocker	ChemblInteractions
CACNA1C	CACNA1C	Definite	CACNA1C	PREGABALIN	modulator	ChemblInteractions
CACNA1C	CACNA1C	Definite	CACNA1C	CITALOPRAM		PharmGKB	19388002
CACNA1C	CACNA1C	Definite	CACNA1C	ATENOLOL		PharmGKB	20031608
CACNA1C	CACNA1C	Definite	CACNA1C	GABAPENTIN ENACARBIL	modulator	ChemblInteractions
CACNA1C	CACNA1C	Definite	CACNA1C	DRONEDARONE HYDROCHLORIDE	blocker	ChemblInteractions
CACNA1C	CACNA1C	Definite	CACNA1C	CELECOXIB		PharmGKB	22336956
CACNA1C	CACNA1C	Definite	CACNA1C	NICARDIPINE HYDROCHLORIDE	blocker	ChemblInteractions
CACNA1C	CACNA1C	Definite	CACNA1C	GABAPENTIN	modulator	ChemblInteractions
CACNA1C	CACNA1C	Definite	CACNA1C	AZD1305	blocker	ChemblInteractions
CACNA1C	CACNA1C	Definite	CACNA1C	AMLODIPINE MALEATE	blocker	ChemblInteractions
CACNA1C	CACNA1C	Definite	CACNA1C	DILTIAZEM MALATE	blocker	ChemblInteractions
OPCML	OPCML	Definite	OPCML	METHYLPHENIDATE		PharmGKB	29382897
AKT3	AKT3	Definite	AKT3	UPROSERTIB	inhibitor	ChemblInteractions|CGI|GuideToPharmacology|TTD
AKT3	AKT3	Definite	AKT3	OMIPALISIB	inhibitor	MyCancerGenomeClinicalTrial
AKT3	AKT3	Definite	AKT3	MK-2206	inhibitor|allosteric modulator	TdgClinicalTrial|ClearityFoundationClinicalTrial|ChemblInteractions|GuideToPharmacology|MyCancerGenomeClinicalTrial|TTD
AKT3	AKT3	Definite	AKT3	VEMURAFENIB		CIViC	24265155
AKT3	AKT3	Definite	AKT3	XL-418	inhibitor	TdgClinicalTrial|ChemblInteractions|TTD	19644473
AKT3	AKT3	Definite	AKT3	PERIFOSINE		TdgClinicalTrial
AKT3	AKT3	Definite	AKT3	GSK-690693	inhibitor	ChemblInteractions|GuideToPharmacology|TTD
AKT3	AKT3	Definite	AKT3	TRICIRIBINE PHOSPHATE	inhibitor	ChemblInteractions
AKT3	AKT3	Definite	AKT3	MSC-2363318A	inhibitor	ChemblInteractions|TTD
AKT3	AKT3	Definite	AKT3	IPATASERTIB	inhibitor	TdgClinicalTrial|ClearityFoundationClinicalTrial|ChemblInteractions|GuideToPharmacology|MyCancerGenomeClinicalTrial
AKT3	AKT3	Definite	AKT3	ARCHEXIN		TdgClinicalTrial
AKT3	AKT3	Definite	AKT3	SR-13668		TTD
AKT3	AKT3	Definite	AKT3	EVEROLIMUS	inhibitor	MyCancerGenomeClinicalTrial
AKT3	AKT3	Definite	AKT3	AFURESERTIB	inhibitor	ChemblInteractions|GuideToPharmacology|TTD
AKT3	AKT3	Definite	AKT3	CAPIVASERTIB	inhibitor	ClearityFoundationClinicalTrial|CGI|GuideToPharmacology|TTD
AKT3	AKT3	Definite	AKT3	AZD-5363	inhibitor	ChemblInteractions
AKT3	AKT3	Definite	AKT3	GSK-269962A		DTC
AKT3	AKT3	Definite	AKT3	TRICIRIBINE		TdgClinicalTrial|ClearityFoundationClinicalTrial
AKT3	AKT3	Definite	AKT3	A-443654	inhibitor	GuideToPharmacology
AKT3	AKT3	Definite	AKT3	MIRANSERTIB	allosteric modulator|inhibitor	ChemblInteractions|GuideToPharmacology
AKT3	AKT3	Definite	AKT3	LY-2780301	inhibitor	ChemblInteractions
AKT3	AKT3	Definite	AKT3	FASUDIL		DTC
AKT3	AKT3	Definite	AKT3	MK-2201	inhibitor	ChemblInteractions
ITIH3	ITIH3	Definite	ITIH3	CLOZAPINE		PharmGKB	27396837
FYN	FYN	Definite	FYN	TG100-801	inhibitor	ChemblInteractions
FYN	FYN	Definite	FYN	DASATINIB	inhibitor|multitarget	TdgClinicalTrial|ChemblInteractions|TEND|TTD	20072833|11752352|17139284|17016423
FYN	FYN	Definite	FYN	CHEMBL379975		DTC
FYN	FYN	Definite	FYN	OSI-632		DTC
FYN	FYN	Definite	FYN	BOSUTINIB	inhibitor	GuideToPharmacology
FYN	FYN	Definite	FYN	ACALABRUTINIB	inhibitor	GuideToPharmacology
FYN	FYN	Definite	FYN	ILORASERTIB	inhibitor	DTC|ChemblInteractions
FYN	FYN	Definite	FYN	XL-228	inhibitor	ChemblInteractions
FYN	FYN	Definite	FYN	AZAKENPAULLONE		DTC
FYN	FYN	Definite	FYN	JNJ-26483327	inhibitor	ChemblInteractions|TTD
FYN	FYN	Definite	FYN	R-406		DTC
FYN	FYN	Definite	FYN	VANDETANIB		DTC
FYN	FYN	Definite	FYN	TOZASERTIB		DTC
FYN	FYN	Definite	FYN	KENPAULLONE		DTC
FYN	FYN	Definite	FYN	CEDIRANIB		DTC
FYN	FYN	Definite	FYN	PAZOPANIB		DTC
FYN	FYN	Definite	FYN	PEXMETINIB	inhibitor	GuideToPharmacology
FYN	FYN	Definite	FYN	CYC-116		DTC
FYN	FYN	Definite	FYN	CHEMBL406845		DTC
FYN	FYN	Definite	FYN	PD-0166285		DTC
FYN	FYN	Definite	FYN	CHEMBL546797		DTC
FYN	FYN	Definite	FYN	BARASERTIB		DTC
FYN	FYN	Definite	FYN	ADAVOSERTIB		DTC
FYN	FYN	Definite	FYN	IBRUTINIB	inhibitor	GuideToPharmacology
FYN	FYN	Definite	FYN	ALDESLEUKIN		NCI	1668889|1472476
FYN	FYN	Definite	FYN	NINTEDANIB	inhibitor	TALC
FYN	FYN	Definite	FYN	ENMD-2076		TdgClinicalTrial
FYN	FYN	Definite	FYN	RG-1530		DTC
FYN	FYN	Definite	FYN	PF-00562271		DTC
FYN	FYN	Definite	FYN	ENMD-981693	inhibitor	ChemblInteractions
FYN	FYN	Definite	FYN	AST-487		DTC
FYN	FYN	Definite	FYN	TAE-684		DTC
FYN	FYN	Definite	FYN	ENTRECTINIB		DTC
FYN	FYN	Definite	FYN	DOVITINIB		DTC
FYN	FYN	Definite	FYN	CENISERTIB		DTC
FYN	FYN	Definite	FYN	HESPERADIN	inhibitor	DTC	19035792
FYN	FYN	Definite	FYN	CHEMBL202721		DTC
GALNT2	GALNT2	Definite	GALNT2	ATENOLOL		PharmGKB
DPYD	DPYD	Definite	DPYD	CAPECITABINE		NCI|CGI|CIViC|FDA	16279094|23988873
DPYD	DPYD	Definite	DPYD	TEGAFUR		NCI|CGI|CIViC|PharmGKB	12209976|28950804|24923815|30858516|23603345|16115930|27122156|31382864|22490566|9470816|18600527|15944764|26603945|18443386|17700593|17165084|17000685|19530960|26794347|19795123|12360106|19473056|9439663|26099996|26216193|27864592|17121937|18299612|28295243|15132136|20819423|27995989|16151913|15017333|24817302|30114658|29846282|9323575|29134491|23988873|17203168|11895907|32378051|25677447|170648…
DPYD	DPYD	Definite	DPYD	FLUOROURACIL		NCI|CIViC|TTD|FDA	16421754|15330204|17179731|23988873|15538739|11501504|31871216
DPYD	DPYD	Definite	DPYD	IRINOTECAN		PharmGKB	28395759
DPYD	DPYD	Definite	DPYD	LEUCOVORIN		NCI|CIViC|PharmGKB	11977552|12576451|31871216
DPYD	DPYD	Definite	DPYD	FLUCYTOSINE		PharmGKB
DPYD	DPYD	Definite	DPYD	ENILURACIL		TdgClinicalTrial|TTD	16466986
DPYD	DPYD	Definite	DPYD	GIMERACIL	inhibitor	TdgClinicalTrial
DPYD	DPYD	Definite	DPYD	OXALIPLATIN		NCI	17127229
ABCB4	ABCB4	Definite	ABCB4	VINBLASTINE		NCI	7918493
ABCB4	ABCB4	Definite	ABCB4	VINCRISTINE		NCI	1673638
ABCB4	ABCB4	Definite	ABCB4	ORTATAXEL		TTD
ABCB4	ABCB4	Definite	ABCB4	CYCLOSPORINE		NCI	1972761
ABCB4	ABCB4	Definite	ABCB4	CURCUMIN		TTD
ABCB4	ABCB4	Definite	ABCB4	IMATINIB		PharmGKB	30237583
ABCB4	ABCB4	Definite	ABCB4	BENZQUINAMIDE		TTD
CYP46A1	CYP46A1	Definite	CYP46A1	SOTICLESTAT		TTD
HCN1	HCN1	Definite	HCN1	TRAMADOL		PharmGKB	30971809
HCN1	HCN1	Definite	HCN1	ZATEBRADINE	blocker	GuideToPharmacology
HCN1	HCN1	Definite	HCN1	IVABRADINE	blocker	GuideToPharmacology
HCN1	HCN1	Definite	HCN1	CILOBRADINE	blocker	GuideToPharmacology
PAH	PAH	Definite	PAH	SAPROPTERIN		TdgClinicalTrial|TEND
PAH	PAH	Definite	PAH	SAPROPTERIN DIHYDROCHLORIDE	activator	ChemblInteractions
PAH	PAH	Definite	PAH	CARBOCYSTEINE		PharmGKB	19036622
PAH	PAH	Definite	PAH	SAPROPTERIN	activator|cofactor	TdgClinicalTrial|TEND|GuideToPharmacology	10839989|10924272|10089284|10872454|11163771
PAH	PAH	Definite	PAH	FENCLONINE	inhibitor	GuideToPharmacology
PAH	PAH	Definite	PAH	PEGVALIASE		TTD
ERBB4	ERBB4	Definite	ERBB4	PALIPERIDONE		PharmGKB	25714000
ERBB4	ERBB4	Definite	ERBB4	PELITINIB	inhibitor	TALC|MyCancerGenome
ERBB4	ERBB4	Definite	ERBB4	ERLOTINIB		DTC|JAX-CKB|PharmGKB	27207775
ERBB4	ERBB4	Definite	ERBB4	AC-480	inhibitor	TALC|MyCancerGenome|TdgClinicalTrial|ChemblInteractions|GuideToPharmacology
ERBB4	ERBB4	Definite	ERBB4	AFATINIB	inhibitor	JAX-CKB|CGI	27207775
ERBB4	ERBB4	Definite	ERBB4	LAPATINIB		DTC|JAX-CKB|CGI|DoCM|CIViC|PharmGKB	25590338|19718025
ERBB4	ERBB4	Definite	ERBB4	ILORASERTIB		DTC
ERBB4	ERBB4	Definite	ERBB4	CETUXIMAB		JAX-CKB	27207775
ERBB4	ERBB4	Definite	ERBB4	JNJ-26483327	inhibitor	ChemblInteractions
ERBB4	ERBB4	Definite	ERBB4	AZD-1152-HQPA		DTC
ERBB4	ERBB4	Definite	ERBB4	IBRUTINIB	inhibitor	GuideToPharmacology
ERBB4	ERBB4	Definite	ERBB4	DACOMITINIB	inhibitor	TALC|MyCancerGenome|TdgClinicalTrial|ChemblInteractions|GuideToPharmacology|MyCancerGenomeClinicalTrial
ERBB4	ERBB4	Definite	ERBB4	CURCUMIN		DTC	25753330
ERBB4	ERBB4	Definite	ERBB4	LAUROGUADINE		DTC
ERBB4	ERBB4	Definite	ERBB4	SP-600125		DTC
ERBB4	ERBB4	Definite	ERBB4	TUCATINIB	inhibitor	GuideToPharmacology
ERBB4	ERBB4	Definite	ERBB4	ALLITINIB	inhibitor	GuideToPharmacology
ERBB4	ERBB4	Definite	ERBB4	GEFITINIB	inhibitor	DTC|MyCancerGenomeClinicalTrial|PharmGKB
ERBB4	ERBB4	Definite	ERBB4	METHYLCURCUMIN		DTC	25753330
ERBB4	ERBB4	Definite	ERBB4	R-406		DTC
ERBB4	ERBB4	Definite	ERBB4	DIMETHYLCURCUMIN		DTC	25753330
ERBB4	ERBB4	Definite	ERBB4	AEE-788	inhibitor	GuideToPharmacology
ERBB4	ERBB4	Definite	ERBB4	POZIOTINIB	inhibitor	ChemblInteractions|GuideToPharmacology|MyCancerGenomeClinicalTrial
ERBB4	ERBB4	Definite	ERBB4	SB-220025		DTC
ERBB4	ERBB4	Definite	ERBB4	BMS-690514	inhibitor	TALC|MyCancerGenome|ChemblInteractions
ERBB4	ERBB4	Definite	ERBB4	TAK-715		DTC
ERBB4	ERBB4	Definite	ERBB4	OSIMERTINIB MESYLATE	inhibitor	ChemblInteractions
ERBB4	ERBB4	Definite	ERBB4	AFATINIB DIMALEATE	inhibitor	ChemblInteractions
ERBB4	ERBB4	Definite	ERBB4	TAE-684		DTC
ERBB4	ERBB4	Definite	ERBB4	CENISERTIB		DTC
ERBB4	ERBB4	Definite	ERBB4	VANDETANIB	inhibitor	ChemblInteractions
ERBB4	ERBB4	Definite	ERBB4	DASATINIB		DTC
ERBB4	ERBB4	Definite	ERBB4	CHEMBL578061		DTC
ERBB4	ERBB4	Definite	ERBB4	CANERTINIB DIHYDROCHLORIDE	inhibitor	ChemblInteractions
ERBB4	ERBB4	Definite	ERBB4	RG-1530		DTC
ERBB4	ERBB4	Definite	ERBB4	ACALABRUTINIB	inhibitor	GuideToPharmacology
ERBB4	ERBB4	Definite	ERBB4	ALISERTIB		DTC
ERBB4	ERBB4	Definite	ERBB4	CEDIRANIB		DTC
MAPK3	MAPK3	Definite	MAPK3	CHEMBL2333548		DTC
MAPK3	MAPK3	Definite	MAPK3	ETOPOSIDE		DTC	23999041
MAPK3	MAPK3	Definite	MAPK3	CHEMBL329785		DTC	22982122
MAPK3	MAPK3	Definite	MAPK3	YUANHUADINE		DTC	21916433
MAPK3	MAPK3	Definite	MAPK3	CIMIRACEMATE A		DTC	19835377
MAPK3	MAPK3	Definite	MAPK3	MK-8353	inhibitor	ChemblInteractions|GuideToPharmacology
MAPK3	MAPK3	Definite	MAPK3	CHEMBL29197		DTC	17681471
MAPK3	MAPK3	Definite	MAPK3	CHEMBL2088730		DTC	22982122
MAPK3	MAPK3	Definite	MAPK3	MADOLIN A		DTC
MAPK3	MAPK3	Definite	MAPK3	VOLVALERENAL D		DTC
MAPK3	MAPK3	Definite	MAPK3	CHEMBL389685		DTC	26492576
MAPK3	MAPK3	Definite	MAPK3	OPHIOBOLIN O		DTC	22130129
MAPK3	MAPK3	Definite	MAPK3	ULIXERTINIB	inhibitor	ChemblInteractions|GuideToPharmacology|TTD	28939558
MAPK3	MAPK3	Definite	MAPK3	ARISTOYUNNOLIN A		DTC
MAPK3	MAPK3	Definite	MAPK3	DEMETHYLWEDELOLACTONE		DTC	22926226
MAPK3	MAPK3	Definite	MAPK3	PRASTERONE		NCI	17102100
MAPK3	MAPK3	Definite	MAPK3	RAVOXERTINIB	inhibitor	ChemblInteractions|GuideToPharmacology|TTD	25320010
MAPK3	MAPK3	Definite	MAPK3	COMBRETASTATIN A4		DTC	22982122
MAPK3	MAPK3	Definite	MAPK3	CYCLOPHOSPHAMIDE		NCI	15193230
MAPK3	MAPK3	Definite	MAPK3	NITROGLYCERIN		NCI	16612556
MAPK3	MAPK3	Definite	MAPK3	GAMBOGIC ACID		DTC	17911251
MAPK3	MAPK3	Definite	MAPK3	ANDROSTANOLONE		NCI	16773205
MAPK3	MAPK3	Definite	MAPK3	WEDELOLACTONE		DTC	22926226
MAPK3	MAPK3	Definite	MAPK3	PHENETHYLISOTHIOCYANATE		DTC	22607231
MAPK3	MAPK3	Definite	MAPK3	SORAFENIB		PharmGKB	20124951
MAPK3	MAPK3	Definite	MAPK3	CHEMBL2063687		DTC	22283430
MAPK3	MAPK3	Definite	MAPK3	CHEMBL35482		DTC
MAPK3	MAPK3	Definite	MAPK3	PESUDOGINSENOSIDE RP1 METHYL ESTER		DTC	20951582
MAPK3	MAPK3	Definite	MAPK3	CHEMBL2333543		DTC
MAPK3	MAPK3	Definite	MAPK3	ARISTOLACTONE		DTC
MAPK3	MAPK3	Definite	MAPK3	QUERCETIN		NCI	17045724
MAPK3	MAPK3	Definite	MAPK3	CHEMBL269881		DTC
MAPK3	MAPK3	Definite	MAPK3	WITHAFERIN A		DTC	20726569
MAPK3	MAPK3	Definite	MAPK3	CHEMBL2063681		DTC	22283430
MAPK3	MAPK3	Definite	MAPK3	CHEMBL2088731		DTC	22982122
MAPK3	MAPK3	Definite	MAPK3	XANTHOHUMOL		DTC	22111577
MAPK3	MAPK3	Definite	MAPK3	SPINASAPONIN A METHYL ESTER		DTC	20951582
MAPK3	MAPK3	Definite	MAPK3	MADOLIN U		DTC
MAPK3	MAPK3	Definite	MAPK3	MADOLIN T		DTC
MAPK3	MAPK3	Definite	MAPK3	GAMBOGIC AMIDE		DTC	17911251
PTPA	PTPA	Definite	PTPA	LB-100		TTD
CHRNA3	CHRNA3	Definite	CHRNA3	TC-6499	agonist	ChemblInteractions
CHRNA3	CHRNA3	Definite	CHRNA3	PENTOLINIUM TARTRATE	antagonist	ChemblInteractions
CHRNA3	CHRNA3	Definite	CHRNA3	HEXAMETHONIUM	blocker	GuideToPharmacology
CHRNA3	CHRNA3	Definite	CHRNA3	ALCOHOL		PharmGKB	23641218|19270242
CHRNA3	CHRNA3	Definite	CHRNA3	LARAZOTIDE ACETATE	partial agonist	ChemblInteractions
CHRNA3	CHRNA3	Definite	CHRNA3	MECAMYLAMINE HYDROCHLORIDE		ChemblInteractions
CHRNA3	CHRNA3	Definite	CHRNA3	VARENICLINE	agonist|partial agonist	TdgClinicalTrial|GuideToPharmacology	16766716
CHRNA3	CHRNA3	Definite	CHRNA3	CHEMBL448084		DTC	19027295
CHRNA3	CHRNA3	Definite	CHRNA3	NICOTINE	agonist	GuideToPharmacology|PharmGKB	19560048|11006350|20886544|24535486|31402126|20400469|20081230
CHRNA3	CHRNA3	Definite	CHRNA3	EPIBATIDINE	agonist	DTC	9454827|20337496
CHRNA3	CHRNA3	Definite	CHRNA3	CHEMBL490153	blocker	GuideToPharmacology
CHRNA3	CHRNA3	Definite	CHRNA3	CHEMBL466398		DTC	19027295
CHRNA3	CHRNA3	Definite	CHRNA3	ASM-024	antagonist	ChemblInteractions
CHRNA3	CHRNA3	Definite	CHRNA3	TRIMETHAPHAN CAMSYLATE	antagonist	ChemblInteractions
CHRNA3	CHRNA3	Definite	CHRNA3	COCAINE		PharmGKB	32152934
CHRNA3	CHRNA3	Definite	CHRNA3	MECAMYLAMINE	blocker	GuideToPharmacology
CHRNA3	CHRNA3	Definite	CHRNA3	PHANTASMIDINE		DTC	20337496
CHRNA3	CHRNA3	Definite	CHRNA3	CHEMBL2332279		DTC	23352509
CHRNA3	CHRNA3	Definite	CHRNA3	ATRACURIUM	antagonist	GuideToPharmacology
CHRNA3	CHRNA3	Definite	CHRNA3	COTININE		PharmGKB
AGT	AGT	Definite	AGT	QUINAPRIL		NCI|PharmGKB	12693379|11849656
AGT	AGT	Definite	AGT	CHLORTHALIDONE		PharmGKB
AGT	AGT	Definite	AGT	HYDROCORTISONE		NCI	15576665
AGT	AGT	Definite	AGT	ATENOLOL		PharmGKB	11593098|14700505
AGT	AGT	Definite	AGT	IRBESARTAN		PharmGKB	11593098|15614026|14700505
AGT	AGT	Definite	AGT	AMLODIPINE		PharmGKB
AGT	AGT	Definite	AGT	LISINOPRIL		PharmGKB
AGT	AGT	Definite	AGT	BENAZEPRIL		PharmGKB	17261659|25143324
AGT	AGT	Definite	AGT	IMIDAPRIL		PharmGKB	25143324
AGT	AGT	Definite	AGT	CYT006-ANGQB		TdgClinicalTrial
AGT	AGT	Definite	AGT	ASPIRIN		PharmGKB	20824505
AGT	AGT	Definite	AGT	ADRIAMYCIN		NCI	7581027
AGT	AGT	Definite	AGT	ENALAPRIL		NCI	11928713
AGT	AGT	Definite	AGT	MESTRANOL		NCI	3023023
CANX	CANX	Definite	CANX	MYELOPEROXIDASE		NCI	11818449
IMPDH1	IMPDH1	Definite	IMPDH1	RIBAVIRIN	inhibitor	ChemblInteractions|GuideToPharmacology|TTD	16293677|16152757|16421290|11752352
IMPDH1	IMPDH1	Definite	IMPDH1	MERCAPTOPURINE	inhibitor	TTD	11752352|18506437
IMPDH1	IMPDH1	Definite	IMPDH1	TARIBAVIRIN HYDROCHLORIDE		TTD
IMPDH1	IMPDH1	Definite	IMPDH1	MYCOPHENOLATE MOFETIL	inhibitor	ChemblInteractions
IMPDH1	IMPDH1	Definite	IMPDH1	MYCOPHENOLIC ACID	inhibitor	ChemblInteractions
IMPDH1	IMPDH1	Definite	IMPDH1	MIZORIBINE		TTD
IMPDH1	IMPDH1	Definite	IMPDH1	THIOGUANINE	inhibitor	ChemblInteractions|GuideToPharmacology
IMPDH1	IMPDH1	Definite	IMPDH1	TIAZOFURIN		TTD
IMPDH1	IMPDH1	Definite	IMPDH1	AVN-944		TdgClinicalTrial
IMPDH1	IMPDH1	Definite	IMPDH1	MYCOPHENOLATE MOFETIL HYDROCHLORIDE	inhibitor	ChemblInteractions
RABGAP1L	RABGAP1L	Definite	RABGAP1L	ALCOHOL		PharmGKB
GNL3	GNL3	Definite	GNL3	CYCLOPHOSPHAMIDE		PharmGKB
GNL3	GNL3	Definite	GNL3	EPIRUBICIN		PharmGKB
GNL3	GNL3	Definite	GNL3	FLUOROURACIL		PharmGKB
NDUFA6	NDUFA6	Definite	NDUFA6	ME-344	inhibitor	ChemblInteractions
NDUFA6	NDUFA6	Definite	NDUFA6	NV-128	inhibitor	ChemblInteractions
NDUFA6	NDUFA6	Definite	NDUFA6	METFORMIN HYDROCHLORIDE	inhibitor	ChemblInteractions
PBK	PBK	Definite	PBK	LINIFANIB		DTC
PBK	PBK	Definite	PBK	GEFITINIB		CIViC	26745678
PBK	PBK	Definite	PBK	CHEMBL541400		DTC
PBK	PBK	Definite	PBK	SP-600125		DTC
PBK	PBK	Definite	PBK	CHEMBL225519		DTC
OGA	OGA	Definite	OGA	CHEMBL1213603	inhibitor	GuideToPharmacology
OGA	OGA	Definite	OGA	STREPTOZOCIN		NCI	11336633|18721751
ABCB1	ABCB1	Definite	ABCB1	DAPTOMYCIN		PharmGKB	25239468
ABCB1	ABCB1	Definite	ABCB1	PACLITAXEL		DTC|NCI|CIViC	16289636|15876424|16467099
ABCB1	ABCB1	Definite	ABCB1	AGOMELATINE		PharmGKB
ABCB1	ABCB1	Definite	ABCB1	NICARDIPINE		PharmGKB
ABCB1	ABCB1	Definite	ABCB1	DEXTROMETHORPHAN		NCI	15582917
ABCB1	ABCB1	Definite	ABCB1	VINBLASTINE		DTC	21348461|20363635
ABCB1	ABCB1	Definite	ABCB1	2'-HYDROXYCHALCONE		DTC	22112540
ABCB1	ABCB1	Definite	ABCB1	RANOLAZINE		PharmGKB	24433361
ABCB1	ABCB1	Definite	ABCB1	SPIRONOLACTONE		NCI|PharmGKB	16740618
ABCB1	ABCB1	Definite	ABCB1	TESMILIFENE	inducer	TdgClinicalTrial	16413681|10755318
ABCB1	ABCB1	Definite	ABCB1	PROPRANOLOL		NCI|PharmGKB	15023456
ABCB1	ABCB1	Definite	ABCB1	HETEROCODEINE		DTC	18311899
ABCB1	ABCB1	Definite	ABCB1	RISPERIDONE		PharmGKB	29723928|24589909|26129906|29443543|19997080|23609392
ABCB1	ABCB1	Definite	ABCB1	DENDROAMIDE A		DTC	8786364
ABCB1	ABCB1	Definite	ABCB1	GABAPENTIN		NCI	17328248
ABCB1	ABCB1	Definite	ABCB1	REMIFENTANIL		PharmGKB	29755652
ABCB1	ABCB1	Definite	ABCB1	QUININE		PharmGKB
ABCB1	ABCB1	Definite	ABCB1	ERLOTINIB		PharmGKB
ABCB1	ABCB1	Definite	ABCB1	BIRICODAR		PharmGKB|TTD
ABCB1	ABCB1	Definite	ABCB1	NORTRIPTYLINE		PharmGKB	12082591
ABCB1	ABCB1	Definite	ABCB1	CHEMBL270688		DTC	18257545
ABCB1	ABCB1	Definite	ABCB1	METHYLPREDNISOLONE		PharmGKB	14583680
ABCB1	ABCB1	Definite	ABCB1	GRANISETRON		PharmGKB	29177570|27241063
ABCB1	ABCB1	Definite	ABCB1	VORICONAZOLE		PharmGKB	19033450
ABCB1	ABCB1	Definite	ABCB1	RITONAVIR		DTC|PharmGKB	17324111|26174719|14600574|17664327|24997317|16355344|23996099|28718515|1655344|21288825|25151207|20504240|25622064|17148966|26857335
ABCB1	ABCB1	Definite	ABCB1	MIDAZOLAM		PharmGKB
ABCB1	ABCB1	Definite	ABCB1	VALINOMYCIN		PharmGKB
ABCB1	ABCB1	Definite	ABCB1	PREDNISOLONE		PharmGKB	14583680|25582575
ABCB1	ABCB1	Definite	ABCB1	RESERPINE		DTC|PharmGKB	23273047|22148475
ABCB1	ABCB1	Definite	ABCB1	MORPHINE		DTC|PharmGKB	24703092|25311385|18311899|16580900|29474345|25155932|19514130|17898703
ABCB1	ABCB1	Definite	ABCB1	DELAVIRDINE		DTC	21189339
ABCB1	ABCB1	Definite	ABCB1	ALISKIREN		PharmGKB
ABCB1	ABCB1	Definite	ABCB1	AMIODARONE		PharmGKB
ABCB1	ABCB1	Definite	ABCB1	CELIPROLOL		PharmGKB
ABCB1	ABCB1	Definite	ABCB1	OXYCODONE		PharmGKB	21209234|19514130
ABCB1	ABCB1	Definite	ABCB1	PENTAZOCINE		PharmGKB
ABCB1	ABCB1	Definite	ABCB1	ITRACONAZOLE		NCI|PharmGKB	15969931
ABCB1	ABCB1	Definite	ABCB1	FLUVASTATIN		PharmGKB	16002074
ABCB1	ABCB1	Definite	ABCB1	7-ETHYL-10-HYDROXYCAMPTOTHECIN		PharmGKB
ABCB1	ABCB1	Definite	ABCB1	NIFEDIPINE		NCI	10213372
ABCB1	ABCB1	Definite	ABCB1	BLEOMYCIN		PharmGKB	25637052
ABCB1	ABCB1	Definite	ABCB1	MODAFINIL		PharmGKB	26757307
ABCB1	ABCB1	Definite	ABCB1	DIGOXIN		NCI	15969931|16674925
ABCB1	ABCB1	Definite	ABCB1	MURUCOIDIN V		DTC	22148475
ABCB1	ABCB1	Definite	ABCB1	ONDANSETRON		PharmGKB	25012726|20707787
ABCB1	ABCB1	Definite	ABCB1	PREDNISONE		PharmGKB	12175731|25637052
ABCB1	ABCB1	Definite	ABCB1	PURGIN II		DTC	23273047
ABCB1	ABCB1	Definite	ABCB1	RITUXIMAB		NCI|PharmGKB	25637052|16971809
ABCB1	ABCB1	Definite	ABCB1	CHEMBL217425		DTC	18257545
ABCB1	ABCB1	Definite	ABCB1	IDARUBICIN		PharmGKB	25558979|20938465|25567217|16331627
ABCB1	ABCB1	Definite	ABCB1	TENIPOSIDE		PharmGKB
ABCB1	ABCB1	Definite	ABCB1	PRAVASTATIN		NCI|PharmGKB	19667110|15616150
ABCB1	ABCB1	Definite	ABCB1	CYCLOSPORINE		DTC|NCI|PharmGKB	21348461|24720452|17964170|23922006|1972761|11754602|18334915|18444945|24088131|23017888|21806386|25536375|24992153|17206635|25240575|26107754|18576903|12966368|18717915|20030680|22886152
ABCB1	ABCB1	Definite	ABCB1	NEFAZODONE		PharmGKB	21449676
ABCB1	ABCB1	Definite	ABCB1	NELFINAVIR		DTC|PharmGKB	20662624|17664327|20860463|11809184|23734829|16267764|16912956
ABCB1	ABCB1	Definite	ABCB1	TARIQUIDAR	inhibitor	DTC|TdgClinicalTrial|ChemblInteractions|PharmGKB	21657271
ABCB1	ABCB1	Definite	ABCB1	COLCHICINE		TEND|PharmGKB	25876828
ABCB1	ABCB1	Definite	ABCB1	PHENOBARBITAL		NCI|PharmGKB	16928449|25846690
ABCB1	ABCB1	Definite	ABCB1	LOPINAVIR		DTC|PharmGKB	17664327|23996099
ABCB1	ABCB1	Definite	ABCB1	IRINOTECAN		PharmGKB	27845419
ABCB1	ABCB1	Definite	ABCB1	TANGERETIN		DTC
ABCB1	ABCB1	Definite	ABCB1	TAMOXIFEN		PharmGKB
ABCB1	ABCB1	Definite	ABCB1	METHYLPHENIDATE		PharmGKB	23771192
ABCB1	ABCB1	Definite	ABCB1	ADRIAMYCIN		NCI	1363885|11069027
ABCB1	ABCB1	Definite	ABCB1	PROPAFENONE		PharmGKB
ABCB1	ABCB1	Definite	ABCB1	TETRACYCLINE		PharmGKB
ABCB1	ABCB1	Definite	ABCB1	DOXYCYCLINE		NCI|PharmGKB	11850258
ABCB1	ABCB1	Definite	ABCB1	PROPOFOL		PharmGKB	29755652
ABCB1	ABCB1	Definite	ABCB1	CARBOPLATIN		NCI	11157479
ABCB1	ABCB1	Definite	ABCB1	EPIRUBICIN		NCI	15161039
ABCB1	ABCB1	Definite	ABCB1	LAMIVUDINE		PharmGKB	23996099
ABCB1	ABCB1	Definite	ABCB1	CURCUMIN		NCI|PharmGKB	15090070
ABCB1	ABCB1	Definite	ABCB1	FEXOFENADINE		PharmGKB	11503014
ABCB1	ABCB1	Definite	ABCB1	PROGESTERONE		PharmGKB
ABCB1	ABCB1	Definite	ABCB1	DEFEROXAMINE		NCI	12514119
ABCB1	ABCB1	Definite	ABCB1	PAROXETINE		PharmGKB	24192121|18215618|21449676|26704739|22641028
ABCB1	ABCB1	Definite	ABCB1	FLAVOKAWAIN A		DTC	22112540
ABCB1	ABCB1	Definite	ABCB1	CYTARABINE		PharmGKB	25558979|20938465|25567217|16331627
ABCB1	ABCB1	Definite	ABCB1	BISANTRENE		NCI	9816258
ABCB1	ABCB1	Definite	ABCB1	BROMPERIDOL		PharmGKB
ABCB1	ABCB1	Definite	ABCB1	CHEMBL595816		DTC	22112540
ABCB1	ABCB1	Definite	ABCB1	VALGANCICLOVIR		PharmGKB	27402191
ABCB1	ABCB1	Definite	ABCB1	MAPROTILINE		PharmGKB
ABCB1	ABCB1	Definite	ABCB1	QUERCETIN-3'-O-PHOSPHATE		TdgClinicalTrial
ABCB1	ABCB1	Definite	ABCB1	RIFAMPIN		PharmGKB
ABCB1	ABCB1	Definite	ABCB1	TAXOL C		DTC	16289636
ABCB1	ABCB1	Definite	ABCB1	LANSOPRAZOLE		PharmGKB	17190370
ABCB1	ABCB1	Definite	ABCB1	AMITRIPTYLINE		PharmGKB	24192121|18215618|26704739|22641028
ABCB1	ABCB1	Definite	ABCB1	TERFENADINE		NCI|PharmGKB	11454724|10213372|16842392
ABCB1	ABCB1	Definite	ABCB1	AMISULPRIDE		PharmGKB	29443543
ABCB1	ABCB1	Definite	ABCB1	FLUOROURACIL		NCI	16892554
ABCB1	ABCB1	Definite	ABCB1	CLOPIDOGREL		PharmGKB	26362473|24262617|24762860|28135763|17112805|21831410|28914344|25060201|28378058|20801498|27380588|25542807|19106083|25850030|23726091|23364775|22045970|23056288|22940005|21806387|24535487|28358842|28589365|25430046|20650435|21918510|23150151|29397568|20801494|22723959|22190063|22028352|22285300|22990067|22624833
ABCB1	ABCB1	Definite	ABCB1	SIMEPREVIR		PharmGKB
ABCB1	ABCB1	Definite	ABCB1	CAMPTOTHECIN		NCI	9918583
ABCB1	ABCB1	Definite	ABCB1	CARVEDILOL		PharmGKB
ABCB1	ABCB1	Definite	ABCB1	CIMETIDINE		PharmGKB
ABCB1	ABCB1	Definite	ABCB1	FENOFIBRATE		NCI	16316932
ABCB1	ABCB1	Definite	ABCB1	LOPERAMIDE		PharmGKB
ABCB1	ABCB1	Definite	ABCB1	ETOPOSIDE		PharmGKB	12969965
ABCB1	ABCB1	Definite	ABCB1	RANITIDINE		NCI|PharmGKB	9862768
ABCB1	ABCB1	Definite	ABCB1	FLUPHENAZINE		PharmGKB
ABCB1	ABCB1	Definite	ABCB1	QUINIDINE		NCI|PharmGKB	1671173
ABCB1	ABCB1	Definite	ABCB1	LEVETIRACETAM		PharmGKB
ABCB1	ABCB1	Definite	ABCB1	DEXRAZOXANE		PharmGKB	25558979|20938465|25567217|16331627
ABCB1	ABCB1	Definite	ABCB1	BEPRIDIL		PharmGKB
ABCB1	ABCB1	Definite	ABCB1	FELODIPINE		PharmGKB
ABCB1	ABCB1	Definite	ABCB1	METHADONE		NCI	15876424
ABCB1	ABCB1	Definite	ABCB1	PERVILLEINE B		DTC	11754602
ABCB1	ABCB1	Definite	ABCB1	TETRABENAZINE		PharmGKB
ABCB1	ABCB1	Definite	ABCB1	VOACAMINE	inhibitor	DTC	16273216|24720452|14612920
ABCB1	ABCB1	Definite	ABCB1	ALDOSTERONE		PharmGKB
ABCB1	ABCB1	Definite	ABCB1	KETOCONAZOLE		PharmGKB
ABCB1	ABCB1	Definite	ABCB1	CLOMIPRAMINE		PharmGKB	21449676
ABCB1	ABCB1	Definite	ABCB1	NEVIRAPINE		DTC|PharmGKB	20017669|21189339|16912957|16912956
ABCB1	ABCB1	Definite	ABCB1	MITOMYCIN		PharmGKB
ABCB1	ABCB1	Definite	ABCB1	LITHIUM		PharmGKB	21449676
ABCB1	ABCB1	Definite	ABCB1	BROMOCRIPTINE		NCI	11856485|9514944
ABCB1	ABCB1	Definite	ABCB1	GEFITINIB		NCI|PharmGKB	25554506|16651435|27089937|15155841
ABCB1	ABCB1	Definite	ABCB1	E-FLUPENTIXOL		PharmGKB
ABCB1	ABCB1	Definite	ABCB1	CHEMBL410907		DTC	18311899
ABCB1	ABCB1	Definite	ABCB1	NITRENDIPINE		PharmGKB
ABCB1	ABCB1	Definite	ABCB1	DOCETAXEL		PharmGKB	21151855
ABCB1	ABCB1	Definite	ABCB1	SIROLIMUS		NCI|PharmGKB	23073467|28676933|14569063
ABCB1	ABCB1	Definite	ABCB1	RUCAPARIB		PharmGKB
ABCB1	ABCB1	Definite	ABCB1	ELACRIDAR		PharmGKB	17932689
ABCB1	ABCB1	Definite	ABCB1	MEFLOQUINE		PharmGKB
ABCB1	ABCB1	Definite	ABCB1	CLARITHROMYCIN		NCI|PharmGKB	16221754
ABCB1	ABCB1	Definite	ABCB1	ZIDOVUDINE		NCI|PharmGKB	22960662|23996099|15456083
ABCB1	ABCB1	Definite	ABCB1	DOMPERIDONE		NCI|PharmGKB	15285840
ABCB1	ABCB1	Definite	ABCB1	ATAZANAVIR		NCI	16355344
ABCB1	ABCB1	Definite	ABCB1	HYDROCORTISONE		NCI|PharmGKB	16873536
ABCB1	ABCB1	Definite	ABCB1	IMATINIB		NCI	15805252|15155841
ABCB1	ABCB1	Definite	ABCB1	LOVASTATIN		NCI|PharmGKB	15616150|10213372
ABCB1	ABCB1	Definite	ABCB1	TEMOZOLOMIDE		PharmGKB	31624332
ABCB1	ABCB1	Definite	ABCB1	DOXORUBICIN		NCI|PharmGKB	29938344|22016816|11408511|25637052|18377430|25582575|18408561
ABCB1	ABCB1	Definite	ABCB1	AUSTOCYSTIN D		DTC	21348461
ABCB1	ABCB1	Definite	ABCB1	PERVILLEINE C		DTC	11754602
ABCB1	ABCB1	Definite	ABCB1	TRIMETREXATE		NCI	10360822
ABCB1	ABCB1	Definite	ABCB1	SORAFENIB		PharmGKB
ABCB1	ABCB1	Definite	ABCB1	DIHYDRO-12-HYDROXY-2,2-DIMETHYL-2H,6H-PYRANO[3,2-B]XANTHEN-6-ONE		DTC
ABCB1	ABCB1	Definite	ABCB1	IBUPROFEN		NCI	11583291
ABCB1	ABCB1	Definite	ABCB1	BOCEPREVIR		PharmGKB	25836019
ABCB1	ABCB1	Definite	ABCB1	ERYTHROMYCIN		PharmGKB
ABCB1	ABCB1	Definite	ABCB1	SUFENTANIL		PharmGKB
ABCB1	ABCB1	Definite	ABCB1	SILIBININ		PharmGKB	26595166
ABCB1	ABCB1	Definite	ABCB1	VINCRISTINE		PharmGKB	29938344|22016816|25637052|25582575|18408561
ABCB1	ABCB1	Definite	ABCB1	IVERMECTIN		PharmGKB
ABCB1	ABCB1	Definite	ABCB1	CHEMBL444075		DTC	26197160
ABCB1	ABCB1	Definite	ABCB1	PANTOPRAZOLE		PharmGKB	15976989
ABCB1	ABCB1	Definite	ABCB1	CHEMBL408422		DTC	18311899
ABCB1	ABCB1	Definite	ABCB1	TIPIFARNIB		PharmGKB	15122075
ABCB1	ABCB1	Definite	ABCB1	ZOSUQUIDAR	inhibitor	TdgClinicalTrial|PharmGKB	18157518
ABCB1	ABCB1	Definite	ABCB1	VERAPAMIL		DTC|NCI	24607999|22405646|21348461|17964170|9862768|22209486|25686592|11754602|22429509|24992153|23683834|18257545|21856049|20363635|1671173
ABCB1	ABCB1	Definite	ABCB1	PERVILLEINE F		DTC	11754602
ABCB1	ABCB1	Definite	ABCB1	SPARFLOXACIN		PharmGKB
ABCB1	ABCB1	Definite	ABCB1	PHENOTHIAZINE		NCI	16750172
ABCB1	ABCB1	Definite	ABCB1	INDINAVIR		PharmGKB
ABCB1	ABCB1	Definite	ABCB1	FENTANYL		PharmGKB	29601950|22277678|27883323|17192767|11964599|19514130|23557865
ABCB1	ABCB1	Definite	ABCB1	CITALOPRAM		PharmGKB	24192121|18215618|26704739|22641028|21546862
ABCB1	ABCB1	Definite	ABCB1	RIVAROXABAN		PharmGKB	27893182
ABCB1	ABCB1	Definite	ABCB1	NICOTINE		NCI	16191663
ABCB1	ABCB1	Definite	ABCB1	DABIGATRAN		PharmGKB	27893182|27261537
ABCB1	ABCB1	Definite	ABCB1	MILTEFOSINE		NCI	11355955
ABCB1	ABCB1	Definite	ABCB1	FILGRASTIM		NCI	7564516
ABCB1	ABCB1	Definite	ABCB1	ANASTROZOLE		PharmGKB
ABCB1	ABCB1	Definite	ABCB1	CHEMBL203365		DTC	16271474
ABCB1	ABCB1	Definite	ABCB1	EFAVIRENZ		DTC|PharmGKB	20662624|24497997|31628422|12545140|27045425|20860463|11809184|26774523|23734829|20720517|20625352|21189339|16267764|25303294|16912956
ABCB1	ABCB1	Definite	ABCB1	LAMOTRIGINE		PharmGKB
ABCB1	ABCB1	Definite	ABCB1	AMPRENAVIR		PharmGKB
ABCB1	ABCB1	Definite	ABCB1	WARFARIN		PharmGKB	25312789|29875668|22248286|29432897
ABCB1	ABCB1	Definite	ABCB1	DAUNORUBICIN		NCI|PharmGKB	25558979|20938465|25567217|10500777|16331627
ABCB1	ABCB1	Definite	ABCB1	LENALIDOMIDE		PharmGKB	29177954
ABCB1	ABCB1	Definite	ABCB1	VECURONIUM		PharmGKB
ABCB1	ABCB1	Definite	ABCB1	CODEINE		DTC|PharmGKB	18311899|22398969
ABCB1	ABCB1	Definite	ABCB1	ASTEMIZOLE		PharmGKB
ABCB1	ABCB1	Definite	ABCB1	CYANOCOBALAMIN		PharmGKB
ABCB1	ABCB1	Definite	ABCB1	ARIPIPRAZOLE		PharmGKB	29443543
ABCB1	ABCB1	Definite	ABCB1	SIMVASTATIN		NCI|PharmGKB	15616150|19802823|16321621|19891551
ABCB1	ABCB1	Definite	ABCB1	OMEPRAZOLE		PharmGKB	15976989|29377228
ABCB1	ABCB1	Definite	ABCB1	DISULFIRAM		PharmGKB
ABCB1	ABCB1	Definite	ABCB1	VALSPODAR		PharmGKB
ABCB1	ABCB1	Definite	ABCB1	MILTIRONE		DTC	26339922
ABCB1	ABCB1	Definite	ABCB1	HALOPERIDOL		PharmGKB
ABCB1	ABCB1	Definite	ABCB1	SEVOFLURANE		PharmGKB
ABCB1	ABCB1	Definite	ABCB1	DRONABINOL		NCI	16439618
ABCB1	ABCB1	Definite	ABCB1	DESIPRAMINE		PharmGKB
ABCB1	ABCB1	Definite	ABCB1	CHEMBL306786		DTC	16271474
ABCB1	ABCB1	Definite	ABCB1	SCUTELLARIN		DTC	22822035
ABCB1	ABCB1	Definite	ABCB1	LEVOFLOXACIN		PharmGKB
ABCB1	ABCB1	Definite	ABCB1	ETRAVIRINE		DTC	21189339
ABCB1	ABCB1	Definite	ABCB1	ATORVASTATIN		NCI|PharmGKB	16103896|21392722|15616150|26932749|19802823|19238649|18851956
ABCB1	ABCB1	Definite	ABCB1	VENLAFAXINE		PharmGKB	24192121|18215618|21449676|26704739|26757307|22641028|26664259
ABCB1	ABCB1	Definite	ABCB1	MITOXANTRONE		PharmGKB
ABCB1	ABCB1	Definite	ABCB1	ACENOCOUMAROL		PharmGKB	24919870
ABCB1	ABCB1	Definite	ABCB1	TALINOLOL		PharmGKB	22725663
ABCB1	ABCB1	Definite	ABCB1	ATENOLOL		PharmGKB
ABCB1	ABCB1	Definite	ABCB1	CAPECITABINE		PharmGKB	21142915|22026922
ABCB1	ABCB1	Definite	ABCB1	LONAFARNIB		NCI	14671431
ABCB1	ABCB1	Definite	ABCB1	FLUVOXAMINE		PharmGKB	18215618|26704739|22641028
ABCB1	ABCB1	Definite	ABCB1	ISONIAZID		PharmGKB	19686464|22162992|29036176
ABCB1	ABCB1	Definite	ABCB1	DILTIAZEM		PharmGKB
ABCB1	ABCB1	Definite	ABCB1	DIPYRIDAMOLE		PharmGKB
ABCB1	ABCB1	Definite	ABCB1	OXCARBAZEPINE		PharmGKB	28837897
ABCB1	ABCB1	Definite	ABCB1	TEMSIROLIMUS		PharmGKB	28676933
ABCB1	ABCB1	Definite	ABCB1	GEMTUZUMAB OZOGAMICIN		NCI	11986941
ABCB1	ABCB1	Definite	ABCB1	BRECANAVIR		DTC	17664327
ABCB1	ABCB1	Definite	ABCB1	CHLORPROMAZINE		NCI|PharmGKB	16810505
ABCB1	ABCB1	Definite	ABCB1	EPOTHILONE D		DTC	24992153
ABCB1	ABCB1	Definite	ABCB1	VEMURAFENIB		PharmGKB	23116250
ABCB1	ABCB1	Definite	ABCB1	MELPHALAN		PharmGKB
ABCB1	ABCB1	Definite	ABCB1	NIMODIPINE		NCI	14743973
ABCB1	ABCB1	Definite	ABCB1	2',4'-DIHYDROXYCHALCONE		DTC	22112540
ABCB1	ABCB1	Definite	ABCB1	SUNITINIB		PharmGKB	25778465|27564227|24874929|26244574|24013576
ABCB1	ABCB1	Definite	ABCB1	FLUOXETINE		PharmGKB	24192121|18215618|24663076
ABCB1	ABCB1	Definite	ABCB1	EVEROLIMUS		PharmGKB
ABCB1	ABCB1	Definite	ABCB1	METOCHALCONE		DTC	22112540
ABCB1	ABCB1	Definite	ABCB1	TRABECTEDIN		PharmGKB	24024892
ABCB1	ABCB1	Definite	ABCB1	MICONAZOLE		NCI	15969931
ABCB1	ABCB1	Definite	ABCB1	3,4-DIHYDROXYXANTHONE		DTC
ABCB1	ABCB1	Definite	ABCB1	PROBENECID		NCI	9182837
ABCB1	ABCB1	Definite	ABCB1	SAQUINAVIR		PharmGKB
ABCB1	ABCB1	Definite	ABCB1	MIFEPRISTONE		PharmGKB
ABCB1	ABCB1	Definite	ABCB1	VINDESINE		PharmGKB	25637052
ABCB1	ABCB1	Definite	ABCB1	CLOZAPINE		PharmGKB	27168101|19593168|22722500
ABCB1	ABCB1	Definite	ABCB1	ROCURONIUM		PharmGKB	25279974
ABCB1	ABCB1	Definite	ABCB1	SERTRALINE		PharmGKB	24192121|18215618|26704739|22641028
ABCB1	ABCB1	Definite	ABCB1	LOSARTAN		PharmGKB	27338075
ABCB1	ABCB1	Definite	ABCB1	OLANZAPINE		PharmGKB	18086475|29443543|17038883
ABCB1	ABCB1	Definite	ABCB1	TOPOTECAN		PharmGKB
ABCB1	ABCB1	Definite	ABCB1	HYDROXOCOBALAMIN		PharmGKB
ABCB1	ABCB1	Definite	ABCB1	CHEMBL533293		DTC
ABCB1	ABCB1	Definite	ABCB1	GARLIC		NCI	11466175
ABCB1	ABCB1	Definite	ABCB1	DEXAMETHASONE		PharmGKB	29177954|18408561
ABCB1	ABCB1	Definite	ABCB1	CISPLATIN		PharmGKB	29938344|22016816|23746184|21332314|20530282
ABCB1	ABCB1	Definite	ABCB1	CAPSAICIN		NCI	16674925
ABCB1	ABCB1	Definite	ABCB1	PERVILLEINE D		DTC	11754602
ABCB1	ABCB1	Definite	ABCB1	DICLOXACILLIN		PharmGKB	15778422|18576903
ABCB1	ABCB1	Definite	ABCB1	BAFETINIB		CIViC	18191450
ABCB1	ABCB1	Definite	ABCB1	CERITINIB		CIViC	26870817
ABCB1	ABCB1	Definite	ABCB1	CRIZOTINIB		CIViC	26870817
XPNPEP3	XPNPEP3	Definite	XPNPEP3	TOSEDOSTAT	inhibitor	ChemblInteractions
EPO	EPO	Definite	EPO	CETUXIMAB		NCI	2016633
EPO	EPO	Definite	EPO	OXYMETHOLONE		NCI	1009362
ATP1A4	ATP1A4	Definite	ATP1A4	DESLANOSIDE	inhibitor	ChemblInteractions
ATP1A4	ATP1A4	Definite	ATP1A4	DIGITOXIN	inhibitor	ChemblInteractions
ATP1A4	ATP1A4	Definite	ATP1A4	ACETYLDIGITOXIN	inhibitor	ChemblInteractions
ATP1A4	ATP1A4	Definite	ATP1A4	DIGOXIN	inhibitor	ChemblInteractions
CTSK	CTSK	Definite	CTSK	ODANACATIB	inhibitor	TALC|TdgClinicalTrial|GuideToPharmacology|TTD	18226527
CTSK	CTSK	Definite	CTSK	CHEMBL1085282		TdgClinicalTrial|TTD
CTSK	CTSK	Definite	CTSK	RELACATIB	inhibitor	TdgClinicalTrial|GuideToPharmacology
CTSK	CTSK	Definite	CTSK	BALICATIB	inhibitor	TALC|GuideToPharmacology
CTSK	CTSK	Definite	CTSK	CHEMBL2316602		DTC	23350811
CHRM3	CHRM3	Definite	CHRM3	SUXAMETHONIUM	agonist	TTD	11752352|9523819
CHRM3	CHRM3	Definite	CHRM3	ACETYLCHOLINE CHLORIDE	agonist	ChemblInteractions
CHRM3	CHRM3	Definite	CHRM3	METHSCOPOLAMINE BROMIDE	antagonist	ChemblInteractions
CHRM3	CHRM3	Definite	CHRM3	GLYCOPYRROLATE	antagonist	ChemblInteractions|GuideToPharmacology
CHRM3	CHRM3	Definite	CHRM3	ACLIDINIUM	antagonist	TdgClinicalTrial|GuideToPharmacology
CHRM3	CHRM3	Definite	CHRM3	TIOTROPIUM	antagonist	TdgClinicalTrial|TEND|GuideToPharmacology|TTD	12582447|10188785|11752352|11281822
CHRM3	CHRM3	Definite	CHRM3	OLANZAPINE	antagonist	TdgClinicalTrial|TEND	17848919|25032030|10227113
CHRM3	CHRM3	Definite	CHRM3	SOLIFENACIN	antagonist	TdgClinicalTrial|TEND|GuideToPharmacology|TTD	20590605|19029429|11752352|17139284|19446545|17016423
CHRM3	CHRM3	Definite	CHRM3	DIPHEMANIL METHYLSULFATE	antagonist	ChemblInteractions	11752352|17139284|17016423
CHRM3	CHRM3	Definite	CHRM3	ANISOTROPINE METHYLBROMIDE	antagonist	ChemblInteractions	4555460|17139284|17016423
CHRM3	CHRM3	Definite	CHRM3	DOTHIEPIN	antagonist	GuideToPharmacology	17471183
CHRM3	CHRM3	Definite	CHRM3	OTENZEPAD	antagonist	GuideToPharmacology
CHRM3	CHRM3	Definite	CHRM3	OXYPHENCYCLIMINE	antagonist	TdgClinicalTrial|TEND	1426023|17139284|17016423|3247303
CHRM3	CHRM3	Definite	CHRM3	OXYBUTYNIN	antagonist	TdgClinicalTrial|ChemblInteractions|TEND|GuideToPharmacology	20590605|16406943|7620236|17222678|19275276|11752352|17139284|19446545|17016423
CHRM3	CHRM3	Definite	CHRM3	TARAFENACIN	antagonist	TdgClinicalTrial|ChemblInteractions|TTD
CHRM3	CHRM3	Definite	CHRM3	CEVIMELINE	agonist	TdgClinicalTrial|TEND|GuideToPharmacology|TTD	18450949|11752352|17139284|17016423
CHRM3	CHRM3	Definite	CHRM3	HEXOCYCLIUM	antagonist	GuideToPharmacology	8075869
CHRM3	CHRM3	Definite	CHRM3	BENZQUINAMIDE	antagonist	TdgClinicalTrial|TEND	17139284|17016423
CHRM3	CHRM3	Definite	CHRM3	METHSCOPOLAMINE		TTD
CHRM3	CHRM3	Definite	CHRM3	DAROTROPIUM BROMIDE	antagonist	ChemblInteractions
CHRM3	CHRM3	Definite	CHRM3	HEXOCYCLIUM METHYLSULFATE	antagonist	ChemblInteractions
CHRM3	CHRM3	Definite	CHRM3	METHACHOLINE CHLORIDE	agonist	ChemblInteractions
CHRM3	CHRM3	Definite	CHRM3	FESOTERODINE FUMARATE	antagonist	ChemblInteractions
CHRM3	CHRM3	Definite	CHRM3	PROPIOMAZINE	antagonist	TdgClinicalTrial|TEND	17139284|17016423
CHRM3	CHRM3	Definite	CHRM3	FURTRETHONIUM	agonist	GuideToPharmacology
CHRM3	CHRM3	Definite	CHRM3	THIETHYLPERAZINE		TdgClinicalTrial|TEND
CHRM3	CHRM3	Definite	CHRM3	TROPICAMIDE	antagonist	ChemblInteractions|GuideToPharmacology	17594079
CHRM3	CHRM3	Definite	CHRM3	PILOCARPINE HYDROCHLORIDE	agonist	ChemblInteractions
CHRM3	CHRM3	Definite	CHRM3	DICYCLOMINE HYDROCHLORIDE	antagonist	ChemblInteractions
CHRM3	CHRM3	Definite	CHRM3	BETHANECHOL	agonist	GuideToPharmacology	9224827
CHRM3	CHRM3	Definite	CHRM3	AMITRIPTYLINE	antagonist	GuideToPharmacology	7855217
CHRM3	CHRM3	Definite	CHRM3	BETHANECHOL CHLORIDE	agonist	ChemblInteractions
CHRM3	CHRM3	Definite	CHRM3	TRIDIHEXETHYL	antagonist	TdgClinicalTrial|TEND	17139284|17016423
CHRM3	CHRM3	Definite	CHRM3	CEVIMELINE HYDROCHLORIDE	agonist	ChemblInteractions
CHRM3	CHRM3	Definite	CHRM3	PROPANTHELINE	antagonist	GuideToPharmacology
CHRM3	CHRM3	Definite	CHRM3	TRIPITRAMINE	antagonist	GuideToPharmacology
CHRM3	CHRM3	Definite	CHRM3	TOLTERODINE	antagonist	TdgClinicalTrial|TEND|GuideToPharmacology|TTD	11193006|19168050|14769832|11752352
CHRM3	CHRM3	Definite	CHRM3	OXYPHENCYCLIMINE HYDROCHLORIDE	antagonist	ChemblInteractions
CHRM3	CHRM3	Definite	CHRM3	SABCOMELINE	agonist	GuideToPharmacology
CHRM3	CHRM3	Definite	CHRM3	TRIDIHEXETHYL CHLORIDE	antagonist	ChemblInteractions
CHRM3	CHRM3	Definite	CHRM3	DARIFENACIN	antagonist	TdgClinicalTrial|TEND|GuideToPharmacology|TTD	20395537|18046909|11752352|19416629
CHRM3	CHRM3	Definite	CHRM3	ASM-024	antagonist	ChemblInteractions
CHRM3	CHRM3	Definite	CHRM3	PILOCARPINE	agonist	TdgClinicalTrial|ChemblInteractions|GuideToPharmacology	18824613|19498041
CHRM3	CHRM3	Definite	CHRM3	PROMAZINE	antagonist	TdgClinicalTrial|TEND	17139284|17016423
CHRM3	CHRM3	Definite	CHRM3	VINCAMINE	allosteric modulator	GuideToPharmacology
CHRM3	CHRM3	Definite	CHRM3	LEVOMEPROMAZINE	antagonist	TdgClinicalTrial|TEND	2870716|2899826
CHRM3	CHRM3	Definite	CHRM3	SCOPOLAMINE	antagonist	GuideToPharmacology	18045203
CHRM3	CHRM3	Definite	CHRM3	ATROPINE	antagonist	TdgClinicalTrial|ChemblInteractions|TEND|GuideToPharmacology	7855217|17139284|17016423
CHRM3	CHRM3	Definite	CHRM3	PROMETHAZINE	antagonist	TdgClinicalTrial|TEND	12476402
CHRM3	CHRM3	Definite	CHRM3	CLIDINIUM BROMIDE	antagonist	ChemblInteractions
CHRM3	CHRM3	Definite	CHRM3	PIPERTRAMINE AMIDE		DTC
CHRM3	CHRM3	Definite	CHRM3	VINBURNINE	allosteric modulator	GuideToPharmacology
CHRM3	CHRM3	Definite	CHRM3	METHIXENE	antagonist	TdgClinicalTrial|TEND	17139284|17016423
CHRM3	CHRM3	Definite	CHRM3	ACECLIDINE		TTD
CHRM3	CHRM3	Definite	CHRM3	IPRATROPIUM	antagonist	GuideToPharmacology|TTD	15987237|28546381|30085570
CHRM3	CHRM3	Definite	CHRM3	ALCURONIUM	allosteric modulator	GuideToPharmacology
CHRM3	CHRM3	Definite	CHRM3	CLIDINIUM	antagonist	GuideToPharmacology
CHRM3	CHRM3	Definite	CHRM3	DIPHENIDOL	antagonist	TdgClinicalTrial|TEND	10530931|1863523|12185001|17139284|17016423
CHRM3	CHRM3	Definite	CHRM3	MILAMELINE	agonist	GuideToPharmacology
CHRM3	CHRM3	Definite	CHRM3	OXYBUTYNIN CHLORIDE	antagonist	ChemblInteractions
CHRM3	CHRM3	Definite	CHRM3	UMECLIDINIUM	antagonist	GuideToPharmacology	23435542
CHRM3	CHRM3	Definite	CHRM3	FESOTERODINE	antagonist	TdgClinicalTrial|TEND	12076307|11752352
CHRM3	CHRM3	Definite	CHRM3	TIOTROPIUM BROMIDE	antagonist	ChemblInteractions
CHRM3	CHRM3	Definite	CHRM3	CYCLOPENTOLATE HYDROCHLORIDE	antagonist	ChemblInteractions
CHRM3	CHRM3	Definite	CHRM3	ISOPROPAMIDE IODIDE	antagonist	ChemblInteractions
CHRM3	CHRM3	Definite	CHRM3	IPRATROPIUM BROMIDE	antagonist	ChemblInteractions
CHRM3	CHRM3	Definite	CHRM3	PIPERTRAMINE		DTC
CHRM3	CHRM3	Definite	CHRM3	MEPENZOLATE BROMIDE	antagonist	ChemblInteractions
CHRM3	CHRM3	Definite	CHRM3	HIMBACINE	antagonist	GuideToPharmacology
CHRM3	CHRM3	Definite	CHRM3	AFACIFENACIN	antagonist	ChemblInteractions
CHRM3	CHRM3	Definite	CHRM3	DICYCLOMINE	antagonist	GuideToPharmacology
CHRM3	CHRM3	Definite	CHRM3	ACLIDINIUM BROMIDE	antagonist	ChemblInteractions|TTD
CHRM3	CHRM3	Definite	CHRM3	PROPANTHELINE BROMIDE	antagonist	ChemblInteractions
CHRM3	CHRM3	Definite	CHRM3	4-DAMP	antagonist	GuideToPharmacology
CHRM3	CHRM3	Definite	CHRM3	PIRENZEPINE	antagonist	GuideToPharmacology
CHRM3	CHRM3	Definite	CHRM3	CHEMBL1917204		DTC
CHRM3	CHRM3	Definite	CHRM3	DOXEPIN	antagonist	TdgClinicalTrial	2141000|7855217|2329499
CHRM3	CHRM3	Definite	CHRM3	BRUCINE	allosteric modulator	GuideToPharmacology
CHRM3	CHRM3	Definite	CHRM3	CHEMBL1084941		DTC
CHRM3	CHRM3	Definite	CHRM3	XANOMELINE	agonist	GuideToPharmacology
CHRM3	CHRM3	Definite	CHRM3	REVEFENACIN	antagonist	GuideToPharmacology
CHRM3	CHRM3	Definite	CHRM3	ACETYLCHOLINE	agonist	GuideToPharmacology	10101037
CHRM3	CHRM3	Definite	CHRM3	BATEFENTEROL	antagonist	ChemblInteractions
CHRM3	CHRM3	Definite	CHRM3	ARECOLINE	agonist	GuideToPharmacology	9224827
CHRM3	CHRM3	Definite	CHRM3	OXYPHENONIUM BROMIDE	antagonist	ChemblInteractions
CHRM3	CHRM3	Definite	CHRM3	METHOCTRAMINE	antagonist	GuideToPharmacology
CHRM3	CHRM3	Definite	CHRM3	TROSPIUM CHLORIDE	antagonist	ChemblInteractions
CHRM3	CHRM3	Definite	CHRM3	CHEMBL523685	allosteric modulator	GuideToPharmacology
CHRM3	CHRM3	Definite	CHRM3	UMECLIDINIUM BROMIDE	antagonist	DTC|ChemblInteractions	19317446
CHRM3	CHRM3	Definite	CHRM3	AZD8683	antagonist	ChemblInteractions
CHRM3	CHRM3	Definite	CHRM3	TOLTERODINE TARTRATE	antagonist	ChemblInteractions
CHRM3	CHRM3	Definite	CHRM3	CARBACHOL	agonist	ChemblInteractions|GuideToPharmacology
CHRM3	CHRM3	Definite	CHRM3	OXOTREMORINE	agonist	GuideToPharmacology
CHRM3	CHRM3	Definite	CHRM3	ZAMIFENACIN		DTC
CHRM3	CHRM3	Definite	CHRM3	STRYCHNINE	allosteric modulator	GuideToPharmacology
CHRM3	CHRM3	Definite	CHRM3	SOLIFENACIN SUCCINATE	antagonist	ChemblInteractions
CHRM3	CHRM3	Definite	CHRM3	LAS190792	antagonist	ChemblInteractions
CHRM3	CHRM3	Definite	CHRM3	ATROPINE SULFATE	antagonist	ChemblInteractions
CHRM3	CHRM3	Definite	CHRM3	DARIFENACIN HYDROBROMIDE	antagonist	ChemblInteractions
CHRM3	CHRM3	Definite	CHRM3	BIPERIDEN	antagonist	GuideToPharmacology
TNFRSF13C	TNFRSF13C	Definite	TNFRSF13C	ARDENERMIN		GuideToPharmacology
CGA	CGA	Definite	CGA	VINBLASTINE		NCI	6181870
CGA	CGA	Definite	CGA	CHEMBL1446150		DTC
CGA	CGA	Definite	CGA	TESTOSTERONE		NCI	1157041
TAT	TAT	Definite	TAT	TETRACYCLINE		NCI	2154
TAT	TAT	Definite	TAT	PROGESTERONE		NCI	9744518
TAT	TAT	Definite	TAT	ALBUMIN HUMAN		NCI	6127852
TAT	TAT	Definite	TAT	PREDNISOLONE		NCI	6127207
TAT	TAT	Definite	TAT	PHENOBARBITAL		NCI	1688552
TAT	TAT	Definite	TAT	METHOTREXATE		NCI	1967611
TAT	TAT	Definite	TAT	GENISTEIN		NCI	9128187
TAT	TAT	Definite	TAT	URIDINE		NCI	6161802
TAT	TAT	Definite	TAT	BENZNIDAZOLE		NCI	17678649
KCNB1	KCNB1	Definite	KCNB1	TEDISAMIL	blocker	ChemblInteractions
KCNB1	KCNB1	Definite	KCNB1	GUANIDINE HYDROCHLORIDE	blocker	ChemblInteractions
KCNB1	KCNB1	Definite	KCNB1	DALFAMPRIDINE	antagonist|blocker	ChemblInteractions	16472864
KCNB1	KCNB1	Definite	KCNB1	NERISPIRDINE	blocker	ChemblInteractions
EIF2AK2	EIF2AK2	Definite	EIF2AK2	BCG VACCINE		NCI	16301626
CHST1	CHST1	Definite	CHST1	IMATINIB		PharmGKB	30237583
F2	F2	Definite	F2	LEPIRUDIN	inhibitor	TdgClinicalTrial|ChemblInteractions|TEND|GuideToPharmacology|TTD	10912644|11467439|10505536|11807012|11055889|11752352
F2	F2	Definite	F2	CHEMBL290376	inhibitor	GuideToPharmacology
F2	F2	Definite	F2	(-)-EPICATECHIN		DTC
F2	F2	Definite	F2	AZD-8165		TTD
F2	F2	Definite	F2	ATECEGATRAN METOXIL		TdgClinicalTrial
F2	F2	Definite	F2	QUERCETIN		DTC
F2	F2	Definite	F2	TAMOXIFEN		PharmGKB|FDA
F2	F2	Definite	F2	ARGATROBAN	inhibitor	TdgClinicalTrial|ChemblInteractions|GuideToPharmacology|TTD	10362188|10226408|10608050|10353669|11752352|10608016
F2	F2	Definite	F2	BIVALIRUDIN	inhibitor	TdgClinicalTrial|ChemblInteractions|TEND|GuideToPharmacology|TTD	11833835|11923794|11929334|11504570|11060732|11752352
F2	F2	Definite	F2	XIMELAGATRAN	inhibitor	TdgClinicalTrial|TEND|GuideToPharmacology	17319469|17516699|17688383|17532684|11752352
F2	F2	Definite	F2	CYANIDIN		DTC
F2	F2	Definite	F2	ANISINDIONE		TTD
F2	F2	Definite	F2	CIANIDANOL		DTC
F2	F2	Definite	F2	DESIRUDIN	inhibitor	ChemblInteractions|GuideToPharmacology
F2	F2	Definite	F2	MELAGATRAN	inhibitor	GuideToPharmacology|TTD
F2	F2	Definite	F2	CHEMBL586628		DTC
F2	F2	Definite	F2	DABIGATRAN	inhibitor	TdgClinicalTrial|ChemblInteractions|TEND|GuideToPharmacology|TTD
F2	F2	Definite	F2	MENADIONE	activator	TEND	2484931|7657295|6867080|2922761|10469489
F2	F2	Definite	F2	ENOXAPARIN		TdgClinicalTrial
F2	F2	Definite	F2	AVATROMBOPAG		PharmGKB|FDA
F2	F2	Definite	F2	PEGMUSIRUDIN		TTD
F2	F2	Definite	F2	DABIGATRAN ETEXILATE MESYLATE	inhibitor	ChemblInteractions
F2	F2	Definite	F2	SILIBININ		DTC
F2	F2	Definite	F2	LUSUTROMBOPAG		PharmGKB|FDA
F2	F2	Definite	F2	HEPARIN		TdgClinicalTrial|TEND
F2	F2	Definite	F2	CYANIN		DTC
F2	F2	Definite	F2	BORTEZOMIB		DTC	20875739
F2	F2	Definite	F2	CHEMBL1083499		TTD
F2	F2	Definite	F2	APRAMIDE A		DTC	10978206
F2	F2	Definite	F2	ODIPARCIL		TTD
STK11	STK11	Definite	STK11	EVEROLIMUS		JAX-CKB|CGI|DoCM	21189378|27615706
STK11	STK11	Definite	STK11	PHENFORMIN		JAX-CKB|CGI	26574479
STK11	STK11	Definite	STK11	VOXTALISIB		JAX-CKB	24634413
STK11	STK11	Definite	STK11	TOZASERTIB	inhibitor	DTC	19035792
STK11	STK11	Definite	STK11	CISPLATIN		JAX-CKB	28652249
STK11	STK11	Definite	STK11	SAPANISERTIB		JAX-CKB	26574479
STK11	STK11	Definite	STK11	SELUMETINIB		JAX-CKB|CIViC	27821489|22425996
STK11	STK11	Definite	STK11	SIROLIMUS		JAX-CKB	20142330
STK11	STK11	Definite	STK11	DOCETAXEL		CGI|CIViC	22425996
STK11	STK11	Definite	STK11	CI-1040		JAX-CKB	27821489
STK11	STK11	Definite	STK11	METFORMIN		JAX-CKB	17062558|18006825
STK11	STK11	Definite	STK11	PEMBROLIZUMAB		CIViC	29773717
STK11	STK11	Definite	STK11	PILARALISIB		JAX-CKB	25637314
STK11	STK11	Definite	STK11	ATEZOLIZUMAB		CIViC	29773717
STK11	STK11	Definite	STK11	GEDATOLISIB		JAX-CKB	21325073
STK11	STK11	Definite	STK11	CHEMBL589258		JAX-CKB	20371716
STK11	STK11	Definite	STK11	ADAVOSERTIB		JAX-CKB	28652249
STK11	STK11	Definite	STK11	TRAMETINIB		JAX-CKB	27821489
STK11	STK11	Definite	STK11	PD-0325901		JAX-CKB	27821489
STK11	STK11	Definite	STK11	PICTILISIB		JAX-CKB	24322983
STK11	STK11	Definite	STK11	NIVOLUMAB		CIViC	29773717
STK11	STK11	Definite	STK11	AZD-8055		JAX-CKB	25436981
STK11	STK11	Definite	STK11	AMPKINONE		DTC	20873794
HDAC10	HDAC10	Definite	HDAC10	APICIDIN		DTC	19705846
HDAC10	HDAC10	Definite	HDAC10	BUTYRYLHYDROXAMIC ACID		DTC	21874153
HDAC10	HDAC10	Definite	HDAC10	RESMINOSTAT		TdgClinicalTrial
HDAC10	HDAC10	Definite	HDAC10	BELINOSTAT	inhibitor	TALC|DTC|TdgClinicalTrial|ChemblInteractions	25937017
HDAC10	HDAC10	Definite	HDAC10	PRACINOSTAT	inhibitor	TdgClinicalTrial|GuideToPharmacology
HDAC10	HDAC10	Definite	HDAC10	ENTINOSTAT	inhibitor	DTC|ChemblInteractions	19966789|20491440
HDAC10	HDAC10	Definite	HDAC10	MOCETINOSTAT		DTC|TdgClinicalTrial	23829483|26287310
HDAC10	HDAC10	Definite	HDAC10	ABEXINOSTAT	inhibitor	TALC|TdgClinicalTrial
HDAC10	HDAC10	Definite	HDAC10	GIVINOSTAT	inhibitor	TALC|TdgClinicalTrial
HDAC10	HDAC10	Definite	HDAC10	VORINOSTAT	inhibitor	TALC|DTC|ClearityFoundationClinicalTrial|GuideToPharmacology	19344175|19966789|26211462|23622981|22260166|20491440|21548582|19084294
HDAC10	HDAC10	Definite	HDAC10	BUTANOIC ACID		DTC	19053749
HDAC10	HDAC10	Definite	HDAC10	PSAMMAPLIN A		DTC	25884112
HDAC10	HDAC10	Definite	HDAC10	PANOBINOSTAT	inhibitor	TALC|TdgClinicalTrial
HDAC10	HDAC10	Definite	HDAC10	CHEMBL324053		DTC	16921367
HDAC10	HDAC10	Definite	HDAC10	SCRIPTAID		DTC	19966789
HDAC10	HDAC10	Definite	HDAC10	AR-42		TdgClinicalTrial
HDAC10	HDAC10	Definite	HDAC10	FIMEPINOSTAT	inhibitor	ChemblInteractions|GuideToPharmacology
HDAC10	HDAC10	Definite	HDAC10	PHENYLBUTYRYLHYDROXAMIC ACID		DTC	21874153
HDAC10	HDAC10	Definite	HDAC10	CHEMBL1650245		DTC	24044874
HDAC10	HDAC10	Definite	HDAC10	7-ETHYL-10-HYDROXYCAMPTOTHECIN		DTC	23622981
HDAC10	HDAC10	Definite	HDAC10	CHIDAMIDE		TdgClinicalTrial
HDAC10	HDAC10	Definite	HDAC10	DAUNORUBICIN		DTC	22260166
HDAC10	HDAC10	Definite	HDAC10	LARGAZOLE		DTC	21420302|25203782|20491440
HDAC10	HDAC10	Definite	HDAC10	ROMIDEPSIN	inhibitor	TdgClinicalTrial|ChemblInteractions
HDAC10	HDAC10	Definite	HDAC10	PANOBINOSTAT LACTATE	inhibitor	ChemblInteractions
HDAC10	HDAC10	Definite	HDAC10	CHEMBL117487		DTC	17566732
HDAC10	HDAC10	Definite	HDAC10	CUDC-101	inhibitor	TALC|TdgClinicalTrial|ChemblInteractions|GuideToPharmacology
HDAC10	HDAC10	Definite	HDAC10	TRICHOSTATIN		DTC	21055848|16921367|19966789|19385600
HDAC10	HDAC10	Definite	HDAC10	PHENYLBUTANOIC ACID		DTC	24044874
HDAC10	HDAC10	Definite	HDAC10	BUFEXAMAC	inhibitor	GuideToPharmacology	21258344
HDAC10	HDAC10	Definite	HDAC10	VALPROIC ACID		DTC	18294844|16921367|25304896
HDAC10	HDAC10	Definite	HDAC10	HINOKITIOL		DTC
HDAC10	HDAC10	Definite	HDAC10	TACEDINALINE	inhibitor	DTC|ChemblInteractions	18692397
HDAC10	HDAC10	Definite	HDAC10	QUISINOSTAT	inhibitor	GuideToPharmacology
HDAC10	HDAC10	Definite	HDAC10	SUBEROHYDROXAMIC ACID		DTC	16921367
MRM2	MRM2	Definite	MRM2	PLAZOMICIN		TTD
CA9	CA9	Definite	CA9	GIRENTUXIMAB		ChemblInteractions|TTD
CA9	CA9	Definite	CA9	ETHOXZOLAMIDE	inhibitor	ChemblInteractions
CA9	CA9	Definite	CA9	CG250 177LU		ChemblInteractions
CA9	CA9	Definite	CA9	CURCUMIN		TTD
CA9	CA9	Definite	CA9	PHENOL		TTD
CA9	CA9	Definite	CA9	INDISULAM		TTD
CA9	CA9	Definite	CA9	CELECOXIB		PharmGKB	22336956
CA9	CA9	Definite	CA9	SUNITINIB		CGI
CA9	CA9	Definite	CA9	PARABEN		TTD
CA9	CA9	Definite	CA9	CG250 111IN		ChemblInteractions
CA9	CA9	Definite	CA9	SULFAMIDE		TTD
CA9	CA9	Definite	CA9	IODINE I 124 GIRENTUXIMAB		ChemblInteractions
PTGES3	PTGES3	Definite	PTGES3	GENISTEIN		NCI	15229138
PTGES3	PTGES3	Definite	PTGES3	DIETHYLSTILBESTROL		NCI	15229138
PTGES3	PTGES3	Definite	PTGES3	GEDUNIN		DTC	25756299
ABCC8	ABCC8	Definite	ABCC8	GLIMEPIRIDE	blocker|inducer	TdgClinicalTrial|ChemblInteractions|TTD	8911984|8172912|8529521
ABCC8	ABCC8	Definite	ABCC8	CHLORPROPAMIDE	blocker|inhibitor	ChemblInteractions|GuideToPharmacology	18220763
ABCC8	ABCC8	Definite	ABCC8	GLYBURIDE	blocker	TdgClinicalTrial|ChemblInteractions|TTD	12213829|17015627|12213059|12031979|9990013|12107069|12145099
ABCC8	ABCC8	Definite	ABCC8	NATEGLINIDE	inhibitor|blocker	TdgClinicalTrial|ChemblInteractions	11716850|10773014|12604678|12196472|11728565|12764427
ABCC8	ABCC8	Definite	ABCC8	TOLBUTAMIDE	blocker|inhibitor	ChemblInteractions|TTD	18220763
ABCC8	ABCC8	Definite	ABCC8	GLIPIZIDE	inhibitor|blocker	ChemblInteractions	11484080|11574406|11078468|11078469|12475777
ABCC8	ABCC8	Definite	ABCC8	REPAGLINIDE	blocker|inhibitor	TdgClinicalTrial|ChemblInteractions|GuideToPharmacology|TTD	15219283|11716850|10773014|15380228|12196472|11728565
ABCC8	ABCC8	Definite	ABCC8	GLIQUIDONE	inhibitor	DTC	11484080|16359864|11574406|11078468|11078469|12475777
ABCC8	ABCC8	Definite	ABCC8	MITIGLINIDE	inhibitor	TdgClinicalTrial	11716850|17003348|17592198
ABCC8	ABCC8	Definite	ABCC8	TOLBUTAMIDE SODIUM, STERILE	blocker	ChemblInteractions
ABCC8	ABCC8	Definite	ABCC8	ACETOHEXAMIDE	blocker	ChemblInteractions|TTD
ABCC8	ABCC8	Definite	ABCC8	NAMINIDIL		ChemblInteractions
ABCC8	ABCC8	Definite	ABCC8	BERBERRUBINE		DTC	16359864
ABCC8	ABCC8	Definite	ABCC8	BERBERINE CHLORIDE		DTC	16359864
ABCC8	ABCC8	Definite	ABCC8	GLICLAZIDE	binder	TTD	11484080|11574406|11078468|11078469|12475777
ABCC8	ABCC8	Definite	ABCC8	TOLAZAMIDE	blocker	ChemblInteractions	8799949|10354277
ABCC8	ABCC8	Definite	ABCC8	SARAKALIM		ChemblInteractions
CHRM4	CHRM4	Definite	CHRM4	SABCOMELINE	agonist	GuideToPharmacology
CHRM4	CHRM4	Definite	CHRM4	SOLIFENACIN	antagonist	TdgClinicalTrial|GuideToPharmacology	19029429
CHRM4	CHRM4	Definite	CHRM4	STRYCHNINE	allosteric modulator	GuideToPharmacology
CHRM4	CHRM4	Definite	CHRM4	TOLTERODINE	antagonist	TdgClinicalTrial|GuideToPharmacology	16406943
CHRM4	CHRM4	Definite	CHRM4	4-DAMP	antagonist	GuideToPharmacology
CHRM4	CHRM4	Definite	CHRM4	OTENZEPAD	antagonist	GuideToPharmacology
CHRM4	CHRM4	Definite	CHRM4	BENZQUINAMIDE	antagonist	TdgClinicalTrial|TEND	17139284|17016423
CHRM4	CHRM4	Definite	CHRM4	OXYPHENONIUM	antagonist	GuideToPharmacology
CHRM4	CHRM4	Definite	CHRM4	AMITRIPTYLINE	antagonist	GuideToPharmacology	7855217
CHRM4	CHRM4	Definite	CHRM4	UMECLIDINIUM	antagonist	GuideToPharmacology	23435542
CHRM4	CHRM4	Definite	CHRM4	PILOCARPINE	partial agonist|agonist	GuideToPharmacology	18824613
CHRM4	CHRM4	Definite	CHRM4	IPRATROPIUM	antagonist	GuideToPharmacology
CHRM4	CHRM4	Definite	CHRM4	TRIPITRAMINE	antagonist	GuideToPharmacology
CHRM4	CHRM4	Definite	CHRM4	METHOCTRAMINE	antagonist	GuideToPharmacology
CHRM4	CHRM4	Definite	CHRM4	PIPERTRAMINE AMIDE		DTC
CHRM4	CHRM4	Definite	CHRM4	GLYCOPYRROLATE	antagonist	GuideToPharmacology
CHRM4	CHRM4	Definite	CHRM4	PROMETHAZINE	antagonist	TdgClinicalTrial|TEND	12476402
CHRM4	CHRM4	Definite	CHRM4	ATROPINE	antagonist	TdgClinicalTrial|TEND|GuideToPharmacology	7855217|17139284|17016423
CHRM4	CHRM4	Definite	CHRM4	SCOPOLAMINE	antagonist	GuideToPharmacology	18045203
CHRM4	CHRM4	Definite	CHRM4	BETHANECHOL	agonist	GuideToPharmacology	9224827
CHRM4	CHRM4	Definite	CHRM4	PROMAZINE	antagonist	TdgClinicalTrial|TEND	17139284|17016423
CHRM4	CHRM4	Definite	CHRM4	TROPICAMIDE	antagonist	TdgClinicalTrial|TEND|GuideToPharmacology|TTD	11752352|17139284|17016423|17594079
CHRM4	CHRM4	Definite	CHRM4	HIMBACINE	antagonist	GuideToPharmacology
CHRM4	CHRM4	Definite	CHRM4	FURTRETHONIUM	agonist	GuideToPharmacology
CHRM4	CHRM4	Definite	CHRM4	CHEMBL1212994		DTC	18059262
CHRM4	CHRM4	Definite	CHRM4	OXYBUTYNIN	antagonist	GuideToPharmacology
CHRM4	CHRM4	Definite	CHRM4	PROPANTHELINE	antagonist	GuideToPharmacology
CHRM4	CHRM4	Definite	CHRM4	PROCYCLIDINE	antagonist	TdgClinicalTrial|TEND	20624420|2253700|1426023|17139284|7616431|17016423
CHRM4	CHRM4	Definite	CHRM4	DAROTROPIUM BROMIDE	antagonist	ChemblInteractions
CHRM4	CHRM4	Definite	CHRM4	DARIFENACIN	antagonist	GuideToPharmacology	18046909|10374898
CHRM4	CHRM4	Definite	CHRM4	ARECOLINE	agonist	GuideToPharmacology
CHRM4	CHRM4	Definite	CHRM4	ALCURONIUM	allosteric modulator	GuideToPharmacology
CHRM4	CHRM4	Definite	CHRM4	METHIXENE	antagonist	TdgClinicalTrial|TEND	17139284|17016423
CHRM4	CHRM4	Definite	CHRM4	ACETYLCHOLINE	agonist	GuideToPharmacology	10101037
CHRM4	CHRM4	Definite	CHRM4	ACECLIDINE		TTD
CHRM4	CHRM4	Definite	CHRM4	DOXEPIN	antagonist	TdgClinicalTrial	2141000|7855217|2329499
CHRM4	CHRM4	Definite	CHRM4	MILAMELINE	agonist	GuideToPharmacology
CHRM4	CHRM4	Definite	CHRM4	STAUROSPORINE	allosteric modulator	GuideToPharmacology
CHRM4	CHRM4	Definite	CHRM4	REVEFENACIN	antagonist	GuideToPharmacology
CHRM4	CHRM4	Definite	CHRM4	XANOMELINE	agonist	GuideToPharmacology
CHRM4	CHRM4	Definite	CHRM4	LEVOMEPROMAZINE	antagonist	TdgClinicalTrial|TEND	2870716|2899826
CHRM4	CHRM4	Definite	CHRM4	VINBURNINE	allosteric modulator	GuideToPharmacology
CHRM4	CHRM4	Definite	CHRM4	THIETHYLPERAZINE		TdgClinicalTrial|TEND
CHRM4	CHRM4	Definite	CHRM4	OXOTREMORINE	agonist	GuideToPharmacology
CHRM4	CHRM4	Definite	CHRM4	PROPIOMAZINE	antagonist	TdgClinicalTrial|TEND	17139284|17016423
CHRM4	CHRM4	Definite	CHRM4	OLANZAPINE	antagonist	TdgClinicalTrial|TEND	17848919|25032030|10227113
CHRM4	CHRM4	Definite	CHRM4	ACLIDINIUM	antagonist	TdgClinicalTrial
CHRM4	CHRM4	Definite	CHRM4	AFACIFENACIN	antagonist	ChemblInteractions
CHRM4	CHRM4	Definite	CHRM4	CEVIMELINE	agonist	GuideToPharmacology
CHRM4	CHRM4	Definite	CHRM4	DOTHIEPIN	antagonist	GuideToPharmacology	17471183
CHRM4	CHRM4	Definite	CHRM4	BIPERIDEN	antagonist	GuideToPharmacology
CHRM4	CHRM4	Definite	CHRM4	VINCAMINE	allosteric modulator	GuideToPharmacology
CHRM4	CHRM4	Definite	CHRM4	HEXOCYCLIUM	antagonist	GuideToPharmacology	8075869
CHRM4	CHRM4	Definite	CHRM4	PIRENZEPINE	antagonist	GuideToPharmacology
CHRM4	CHRM4	Definite	CHRM4	BRUCINE	allosteric modulator	GuideToPharmacology
CHRM4	CHRM4	Definite	CHRM4	PIPERTRAMINE		DTC
CHRM4	CHRM4	Definite	CHRM4	DICYCLOMINE	antagonist	GuideToPharmacology
CHRM4	CHRM4	Definite	CHRM4	CARBACHOL	agonist	GuideToPharmacology
CHRM4	CHRM4	Definite	CHRM4	DIPHENIDOL		TTD
BAD	BAD	Definite	BAD	RUBOXISTAURIN		DTC	18077363
BAD	BAD	Definite	BAD	ISOSORBIDE		TdgClinicalTrial
ATP2A2	ATP2A2	Definite	ATP2A2	GALLOPAMIL		TTD
ATP2A2	ATP2A2	Definite	ATP2A2	CELECOXIB		PharmGKB	22336956
ATP2A2	ATP2A2	Definite	ATP2A2	ISTAROXIME		TdgClinicalTrial	17239702
RORB	RORB	Definite	RORB	TRETINOIN	agonist|antagonist	GuideToPharmacology
ACE	ACE	Definite	ACE	CANDOXATRIL	inhibitor	TdgClinicalTrial|TEND	16642666|11300648
ACE	ACE	Definite	ACE	AMLODIPINE		PharmGKB	20577119
ACE	ACE	Definite	ACE	CHLORTHALIDONE		PharmGKB	20577119
ACE	ACE	Definite	ACE	SPIRONOLACTONE		PharmGKB	15121491
ACE	ACE	Definite	ACE	FOSINOPRIL SODIUM	inhibitor	ChemblInteractions
ACE	ACE	Definite	ACE	RESCINNAMINE	inhibitor	TdgClinicalTrial|TEND|TTD	16431399|11752352|17139284|17016423
ACE	ACE	Definite	ACE	TORSEMIDE		PharmGKB	20877298
ACE	ACE	Definite	ACE	ENALAPRIL MALEATE	inhibitor	ChemblInteractions
ACE	ACE	Definite	ACE	ZOFENOPRIL	inhibitor	GuideToPharmacology	17355163
ACE	ACE	Definite	ACE	MOEXIPRIL	inhibitor	TdgClinicalTrial|TEND|GuideToPharmacology|TTD	11929321|15286086|7473177|11752352
ACE	ACE	Definite	ACE	SILDENAFIL		PharmGKB	12837457
ACE	ACE	Definite	ACE	BENAZEPRIL	inhibitor	TdgClinicalTrial|TEND|GuideToPharmacology|PharmGKB|TTD	19290794|11929321|9535416|8986921|15773232|11217909|10335726|9726242|15788353|11752352|9270093|15967849|11007831|10999650
ACE	ACE	Definite	ACE	FOSINOPRIL	inhibitor	TdgClinicalTrial|TEND|GuideToPharmacology|TTD	11030016|11752352|2836111|11329095
ACE	ACE	Definite	ACE	CAPTOPRIL	inhibitor	TdgClinicalTrial|ChemblInteractions|NCI|TEND|GuideToPharmacology|PharmGKB|TTD	27546928|2839262|16889963|2442780|3937925|11030016|11929321|3320343|19286758|17618628|3325392|3038284|15236580|20830509|20014331|7042175|6275810|11752352|9869506|12424228|12489813|2875891|9551410|9069453|9863143|8864563
ACE	ACE	Definite	ACE	SPIRAPRIL	inhibitor	TdgClinicalTrial|TEND|GuideToPharmacology|TTD	11929321|16126915|12613273|11752352|20524801
ACE	ACE	Definite	ACE	RAMIPRIL	inhibitor	TdgClinicalTrial|ChemblInteractions|TEND|GuideToPharmacology|PharmGKB|TTD	11030016|11929321|16398929|11752352
ACE	ACE	Definite	ACE	DESERPIDINE		TdgClinicalTrial|TEND|TTD
ACE	ACE	Definite	ACE	LISINOPRIL	inhibitor	TdgClinicalTrial|TEND|GuideToPharmacology|PharmGKB|TTD	19290794|11030016|11929321|9535416|17618628|9506845|8986921|15773232|11217909|10335726|20577119|9726242|11752352|9869506|9270093|15967849|11007831|10999650
ACE	ACE	Definite	ACE	QUINAPRIL	inhibitor	TdgClinicalTrial|TEND|PharmGKB|TTD	11929321|11817979|3020249|16116691|11752352
ACE	ACE	Definite	ACE	BUMETANIDE		PharmGKB	20877298
ACE	ACE	Definite	ACE	IMIDAPRILAT	inhibitor	GuideToPharmacology
ACE	ACE	Definite	ACE	NITROPRUSSIDE		PharmGKB	10334805
ACE	ACE	Definite	ACE	FLUVASTATIN		PharmGKB	11545752|10636265
ACE	ACE	Definite	ACE	BENAZEPRIL HYDROCHLORIDE	inhibitor	ChemblInteractions
ACE	ACE	Definite	ACE	SERTRALINE		PharmGKB	27262302
ACE	ACE	Definite	ACE	PERINDOPRIL	inhibitor	TdgClinicalTrial|TEND|GuideToPharmacology|PharmGKB|TTD	11929321|16370923|15788353|11752352|19379059|11007831
ACE	ACE	Definite	ACE	TRANDOLAPRIL	inhibitor	TdgClinicalTrial|ChemblInteractions|TEND|GuideToPharmacology|TTD	11030016|11929321|11752352
ACE	ACE	Definite	ACE	ENALAPRIL	inhibitor	TdgClinicalTrial|TEND|GuideToPharmacology|PharmGKB|TTD	12799093|17618628|9661139|16424790|15236580|8986921|10880412|8538349|11752352
ACE	ACE	Definite	ACE	CILAZAPRIL	inhibitor	TdgClinicalTrial|TEND|GuideToPharmacology|PharmGKB|TTD	19290794|9535416|10398211|8986921|15773232|11217909|10205231|10335726|1382157|1382161|9726242|11752352|9270093|10446934|18423812|15967849|11007831|10999650
ACE	ACE	Definite	ACE	METOPROLOL		PharmGKB	11593098|8728305|12844134
ACE	ACE	Definite	ACE	LISINOPRIL HYDRATE	inhibitor	ChemblInteractions
ACE	ACE	Definite	ACE	INDOMETHACIN		NCI	3937925
ACE	ACE	Definite	ACE	CANDESARTAN		PharmGKB	11593098|12065207
ACE	ACE	Definite	ACE	VORINOSTAT		DTC	24074025
ACE	ACE	Definite	ACE	ACETYLCHOLINE		PharmGKB	10334805
ACE	ACE	Definite	ACE	FLUOXETINE		PharmGKB	27262302
ACE	ACE	Definite	ACE	SPIRAPRILAT	inhibitor	GuideToPharmacology
ACE	ACE	Definite	ACE	IMIDAPRIL	inhibitor	GuideToPharmacology
ACE	ACE	Definite	ACE	HYDROCHLOROTHIAZIDE		PharmGKB|TTD	21269061|12371972|12623934
ACE	ACE	Definite	ACE	MOEXIPRIL HYDROCHLORIDE	inhibitor	ChemblInteractions
ACE	ACE	Definite	ACE	QUINAPRILAT	inhibitor	GuideToPharmacology
ACE	ACE	Definite	ACE	FUROSEMIDE		PharmGKB	20877298
ACE	ACE	Definite	ACE	ASPIRIN		PharmGKB	18727619
ACE	ACE	Definite	ACE	PERINDOPRIL ERBUMINE	inhibitor	ChemblInteractions
ACE	ACE	Definite	ACE	DELAPRIL		TTD
ACE	ACE	Definite	ACE	FASIDOTRILAT	inhibitor	GuideToPharmacology
ACE	ACE	Definite	ACE	TRANDOLAPRILAT	inhibitor	GuideToPharmacology
ACE	ACE	Definite	ACE	BUPROPION		PharmGKB	22947179
ACE	ACE	Definite	ACE	GALLOPAMIL		TTD
ACE	ACE	Definite	ACE	ILEPATRIL		TdgClinicalTrial
ACE	ACE	Definite	ACE	SPIRAPRIL HYDROCHLORIDE	inhibitor	ChemblInteractions
ACE	ACE	Definite	ACE	ENALAPRILAT	inhibitor	GuideToPharmacology|TTD
ACE	ACE	Definite	ACE	ALACEPRIL		TTD
ACE	ACE	Definite	ACE	PERINDOPRILAT	inhibitor	GuideToPharmacology
ACE	ACE	Definite	ACE	QUINAPRIL HYDROCHLORIDE	inhibitor	ChemblInteractions
ACE	ACE	Definite	ACE	PERINDOPRIL ARGININE	inhibitor	ChemblInteractions
ACE	ACE	Definite	ACE	ATENOLOL		PharmGKB	11593098|8728305|12844134
ACE	ACE	Definite	ACE	BENAZEPRILAT	inhibitor	GuideToPharmacology
ACE	ACE	Definite	ACE	PRAVASTATIN		PharmGKB	11545752|16103896|10636265|12695469
ACE	ACE	Definite	ACE	VASOPRESSIN		NCI	6289972
ACE	ACE	Definite	ACE	ATORVASTATIN		PharmGKB	16116691
ACE	ACE	Definite	ACE	GEMFIBROZIL		PharmGKB	12123487
ACE	ACE	Definite	ACE	IRBESARTAN		PharmGKB	11593098|12065207
ACE	ACE	Definite	ACE	RAMIPRILAT	inhibitor	GuideToPharmacology
ACE	ACE	Definite	ACE	CGS-27023A		DTC	24074025
ACE	ACE	Definite	ACE	FASIDOTRIL	inhibitor	GuideToPharmacology
SERPINC1	SERPINC1	Definite	SERPINC1	HEPARIN	activator|potentiator	TdgClinicalTrial|TEND|GuideToPharmacology	10201371|17201083|17537059|19818773|11278930|17600786|11752352|20816747
SERPINC1	SERPINC1	Definite	SERPINC1	SULODEXIDE	potentiator	TdgClinicalTrial|TEND|TTD	11752352|12818259|9436179
SERPINC1	SERPINC1	Definite	SERPINC1	FONDAPARINUX	potentiator|activator	TdgClinicalTrial|TEND|GuideToPharmacology	12501872|15317404|12383039|12383040
SERPINC1	SERPINC1	Definite	SERPINC1	ENOXAPARIN SODIUM	activator	ChemblInteractions
SERPINC1	SERPINC1	Definite	SERPINC1	ENOXAPARIN	activator|potentiator	TEND|GuideToPharmacology|TTD	19888521|17489664|16686945|16207425
SERPINC1	SERPINC1	Definite	SERPINC1	AVATROMBOPAG		PharmGKB|FDA
SERPINC1	SERPINC1	Definite	SERPINC1	DALTEPARIN	activator|potentiator	GuideToPharmacology	8707165|11044537
SERPINC1	SERPINC1	Definite	SERPINC1	TINZAPARIN	potentiator|activator	TdgClinicalTrial|GuideToPharmacology	19888521|15767980|15567452
SERPINC1	SERPINC1	Definite	SERPINC1	GEMCITABINE		PharmGKB	31616045
SERPINC1	SERPINC1	Definite	SERPINC1	CARBOPLATIN		PharmGKB	31616045
SERPINC1	SERPINC1	Definite	SERPINC1	TINZAPARIN SODIUM	activator	ChemblInteractions
SERPINC1	SERPINC1	Definite	SERPINC1	LUSUTROMBOPAG		PharmGKB|FDA
[truncated: 163 more rows]
