# Supplementary material for: A conditional gene-based association framework integrating isoform-level eQTL data reveals new susceptibility genes for schizophrenia
Source: eLife. 2022 Apr 12;11:e70779. doi: 10.7554/eLife.70779 (PMC9005191; doi:10.7554/eLife.70779)
Supplement: Table 6—source data 5. [file elife-70779-table6-data5.xlsx]

## Sheet: eDESE_isoform
The drug-gene interaction term results of the potential susceptibility genes of schizophrenia identified by eDESE:isoform in DGIdb.
search_term	match_term	match_type	gene	drug	interaction_types	sources	pmids
FGA	FGA	Definite	FGA	ALTEPLASE		TdgClinicalTrial	19436656|18673235|17963464
FGA	FGA	Definite	FGA	RETEPLASE		TdgClinicalTrial	19436656|18673235|17963464
FGA	FGA	Definite	FGA	ALFIMEPRASE		TdgClinicalTrial	1696922
FGA	FGA	Definite	FGA	ANISTREPLASE		TdgClinicalTrial	7798503|6750837|17139284|17016423
FGA	FGA	Definite	FGA	FIBRINOLYSIN, HUMAN	inhibitor	ChemblInteractions
FGA	FGA	Definite	FGA	EPTIFIBATIDE		PharmGKB	20938371
FGA	FGA	Definite	FGA	TIROFIBAN		PharmGKB	20938371
FGA	FGA	Definite	FGA	ABCIXIMAB		PharmGKB	20938371
MAPK12	MAPK12	Definite	MAPK12	SB-202190		DTC	22951114
MAPK12	MAPK12	Definite	MAPK12	DORAMAPIMOD	inhibitor	DTC|GuideToPharmacology
MAPK12	MAPK12	Definite	MAPK12	CYC-116		DTC
MAPK12	MAPK12	Definite	MAPK12	CHEMBL225519		DTC
MAPK12	MAPK12	Definite	MAPK12	VALZIFLOCEPT		TTD
MAPK12	MAPK12	Definite	MAPK12	SEMAPIMOD		TdgClinicalTrial
MAPK12	MAPK12	Definite	MAPK12	R-406		DTC
MAPK12	MAPK12	Definite	MAPK12	ARRY-797		TdgClinicalTrial|TTD
MAPK12	MAPK12	Definite	MAPK12	XANTHOHUMOL		DTC	22111577
MAPK12	MAPK12	Definite	MAPK12	NEFLAMAPIMOD		TTD
MAPK12	MAPK12	Definite	MAPK12	RHAMNETIN		DTC	24397781
MAPK12	MAPK12	Definite	MAPK12	PH-797804		DTC|TdgClinicalTrial
MAPK12	MAPK12	Definite	MAPK12	CI-1040		TTD
MAPK12	MAPK12	Definite	MAPK12	PF-00562271		DTC
MAPK12	MAPK12	Definite	MAPK12	CRYPTOLEPINE HYDROCHLORIDE		DTC	23507189
MAPK12	MAPK12	Definite	MAPK12	PIRFENIDONE		TdgClinicalTrial
MAPK12	MAPK12	Definite	MAPK12	OPHIOBOLIN O		DTC	22130129
MAPK12	MAPK12	Definite	MAPK12	KERACYANIN		DTC	17360708
MAPK12	MAPK12	Definite	MAPK12	CHEMBL8483		DTC	18566250
MAPK12	MAPK12	Definite	MAPK12	VX-702		TdgClinicalTrial
MAPK12	MAPK12	Definite	MAPK12	MILTIRONE		DTC	26339922
MAPK12	MAPK12	Definite	MAPK12	SB-203580		DTC	25692815
MAPK12	MAPK12	Definite	MAPK12	BMS-582949		TdgClinicalTrial
MAPK12	MAPK12	Definite	MAPK12	DIHYDROTANSHINONE I		DTC	26339922
MAPK12	MAPK12	Definite	MAPK12	PEXMETINIB		TdgClinicalTrial
MAPK12	MAPK12	Definite	MAPK12	SORAFENIB		PharmGKB	20124951
CHRNA2	CHRNA2	Definite	CHRNA2	GANTACURIUM		TdgClinicalTrial
CHRNA2	CHRNA2	Definite	CHRNA2	CP-601927	agonist	GuideToPharmacology
CHRNA2	CHRNA2	Definite	CHRNA2	CARBACHOL	agonist	TdgClinicalTrial|TEND|TTD	20498043|11752352|17139284|17016423
CHRNA2	CHRNA2	Definite	CHRNA2	ROCURONIUM	antagonist	TdgClinicalTrial|TEND|TTD	19417616|11752352|17139284|16931985|17016423|18633030
CHRNA2	CHRNA2	Definite	CHRNA2	HEXAMETHONIUM	antagonist|blocker	GuideToPharmacology	12183644|8232788
CHRNA2	CHRNA2	Definite	CHRNA2	PIPECURONIUM	antagonist	TdgClinicalTrial|TEND|TTD	12426786|1748153|11752352|9227834|17016423
CHRNA2	CHRNA2	Definite	CHRNA2	DOXACURIUM	antagonist	TdgClinicalTrial|TEND	11752352|17139284|17016423|18633030
CHRNA2	CHRNA2	Definite	CHRNA2	TUBOCURARINE	antagonist	TdgClinicalTrial|TEND|TTD	11562442|20338223|19417616|11752352|17139284|17016423|18633030
CHRNA2	CHRNA2	Definite	CHRNA2	DECAMETHONIUM	partial agonist	TdgClinicalTrial|TEND	12067008|7848904|11752352|17139284|17016423
CHRNA2	CHRNA2	Definite	CHRNA2	CISATRACURIUM	antagonist	TTD	12171561|17139284|17016423
CHRNA2	CHRNA2	Definite	CHRNA2	MIVACURIUM	antagonist	TdgClinicalTrial|TEND|TTD	19417616|11752352|17139284|16931985|17016423|19352159
CHRNA2	CHRNA2	Definite	CHRNA2	BIPERIDEN	antagonist	TdgClinicalTrial|TEND	17139284|17016423
CHRNA2	CHRNA2	Definite	CHRNA2	MECAMYLAMINE	antagonist|blocker|inhibitor	TdgClinicalTrial|TEND|GuideToPharmacology	11752352|17139284|17016423|19778551|12080428
CHRNA2	CHRNA2	Definite	CHRNA2	PANCURONIUM	antagonist	TdgClinicalTrial|TEND	19417616|17016423|17525594
CHRNA2	CHRNA2	Definite	CHRNA2	NICOTINE	agonist	TdgClinicalTrial|TEND	19560048|11006350|20400469|20081230|15048644
CHRNA2	CHRNA2	Definite	CHRNA2	ATRACURIUM		TdgClinicalTrial|TEND
CHRNA2	CHRNA2	Definite	CHRNA2	VECURONIUM	antagonist	TTD	12145052|19417616|18633030
CHRNA2	CHRNA2	Definite	CHRNA2	METOCURINE	antagonist	TdgClinicalTrial|TEND	18842832|8132625|11752352|12799358|18633030
CHRNA2	CHRNA2	Definite	CHRNA2	LEVALLORPHAN		TTD
CHRNA2	CHRNA2	Definite	CHRNA2	CYTISINICLINE		TTD
CACNA1A	CACNA1A	Definite	CACNA1A	PREGABALIN	modulator|inhibitor	TdgClinicalTrial|ChemblInteractions|TEND	16899342|17088553|17144644|17489948|17126531
CACNA1A	CACNA1A	Definite	CACNA1A	BEPRIDIL	inhibitor	TdgClinicalTrial|TEND	17139284|17016423|7565636
CACNA1A	CACNA1A	Definite	CACNA1A	FLUNARIZINE		TTD
CACNA1A	CACNA1A	Definite	CACNA1A	GABAPENTIN ENACARBIL	modulator	ChemblInteractions
CACNA1A	CACNA1A	Definite	CACNA1A	NISOLDIPINE		TdgClinicalTrial|TEND
CACNA1A	CACNA1A	Definite	CACNA1A	GABAPENTIN	modulator	ChemblInteractions
CACNA1A	CACNA1A	Definite	CACNA1A	IMAGABALIN	modulator	ChemblInteractions
CACNA1A	CACNA1A	Definite	CACNA1A	ATAGABALIN	modulator	ChemblInteractions
CACNA1A	CACNA1A	Definite	CACNA1A	BEPRIDIL HYDROCHLORIDE	blocker	ChemblInteractions
CACNA1A	CACNA1A	Definite	CACNA1A	ELPETRIGINE	blocker	ChemblInteractions
CACNA1A	CACNA1A	Definite	CACNA1A	CELECOXIB		PharmGKB	22336956
CRBN	CRBN	Definite	CRBN	POMALIDOMIDE	inhibitor	ChemblInteractions|CGI|CIViC|GuideToPharmacology	23480694|23730498|20223979|22552008
CRBN	CRBN	Definite	CRBN	THALIDOMIDE	inhibitor	ChemblInteractions|GuideToPharmacology	22966948
CRBN	CRBN	Definite	CRBN	AVADOMIDE		GuideToPharmacology|TTD
CRBN	CRBN	Definite	CRBN	LENALIDOMIDE	inhibitor	ChemblInteractions|CGI|CIViC|GuideToPharmacology	23480694|22966948
CRBN	CRBN	Definite	CRBN	IBERDOMIDE		GuideToPharmacology
CRBN	CRBN	Definite	CRBN	IBERDOMIDE HYDROCHLORIDE		TTD
IPO13	IPO13	Definite	IPO13	ENMD-981693		TdgClinicalTrial
KCNK12	KCNK12	Definite	KCNK12	HALOTHANE	inhibitor	GuideToPharmacology
NMUR2	NMUR2	Definite	NMUR2	N-METHYL SCOPOLAMINE	agonist	GuideToPharmacology
CPT1B	CPT1B	Definite	CPT1B	PERHEXILINE		TTD
ADGRB1	ADGRB1	Definite	ADGRB1	PHOSPHATIDYL SERINE	agonist	GuideToPharmacology
CDKN2B	CDKN2B	Definite	CDKN2B	PALBOCICLIB		CIViC	23898052
SLC12A5	SLC12A5	Definite	SLC12A5	BUMETANIDE	inhibitor	TdgClinicalTrial|TEND	10793196
SCTR	SCTR	Definite	SCTR	SECRETIN SYNTHETIC HUMAN	agonist	ChemblInteractions
SCTR	SCTR	Definite	SCTR	SECRETIN	agonist	TdgClinicalTrial|ChemblInteractions|TEND|GuideToPharmacology|TTD	11752352|17139284|17016423
SCTR	SCTR	Definite	SCTR	SECRETIN SYNTHETIC PORCINE	agonist	ChemblInteractions
SCTR	SCTR	Definite	SCTR	VASOACTIVE INTESTINAL PEPTIDE	agonist	GuideToPharmacology
RIPOR2	RIPOR2	Definite	RIPOR2	RIFAMPIN		PharmGKB	30720667
PNOC	PNOC	Definite	PNOC	METHADONE		PharmGKB
PNOC	PNOC	Definite	PNOC	BUPRENORPHINE		PharmGKB
LYN	LYN	Definite	LYN	NINTEDANIB	inhibitor	TALC	18559524|31016670
LYN	LYN	Definite	LYN	CYC-116		DTC
LYN	LYN	Definite	LYN	ILORASERTIB	inhibitor	DTC|ChemblInteractions
LYN	LYN	Definite	LYN	SORAFENIB		DTC
LYN	LYN	Definite	LYN	ACALABRUTINIB	inhibitor	GuideToPharmacology
LYN	LYN	Definite	LYN	GW459057A		DTC	16890436
LYN	LYN	Definite	LYN	JNJ-26483327	inhibitor	ChemblInteractions|TTD
LYN	LYN	Definite	LYN	MASITINIB	inhibitor	TdgClinicalTrial|MyCancerGenomeClinicalTrial
LYN	LYN	Definite	LYN	BAFETINIB	inhibitor	MyCancerGenome|ChemblInteractions|GuideToPharmacology|TTD
LYN	LYN	Definite	LYN	TOLIMIDONE	allosteric modulator	GuideToPharmacology
LYN	LYN	Definite	LYN	LINIFANIB		DTC
LYN	LYN	Definite	LYN	TOZASERTIB		DTC
LYN	LYN	Definite	LYN	IBRUTINIB	inhibitor	DTC|GuideToPharmacology	25222877
LYN	LYN	Definite	LYN	CENISERTIB	inhibitor	TALC|DTC|MyCancerGenome
LYN	LYN	Definite	LYN	R-406		DTC	25222877
LYN	LYN	Definite	LYN	IMATINIB		DTC|CIViC	18191450
LYN	LYN	Definite	LYN	SB-220025		DTC
LYN	LYN	Definite	LYN	PF-00562271		DTC
LYN	LYN	Definite	LYN	GW441756X		DTC
LYN	LYN	Definite	LYN	DORAMAPIMOD		DTC
LYN	LYN	Definite	LYN	XL-228	inhibitor	ChemblInteractions
LYN	LYN	Definite	LYN	PEXMETINIB	inhibitor	GuideToPharmacology
LYN	LYN	Definite	LYN	ENTRECTINIB		DTC
LYN	LYN	Definite	LYN	GW559768X		DTC	17884497
LYN	LYN	Definite	LYN	GO-6976		DTC
LYN	LYN	Definite	LYN	MLN-8054		DTC
LYN	LYN	Definite	LYN	KENPAULLONE		DTC
LYN	LYN	Definite	LYN	RG-1530		DTC
LYN	LYN	Definite	LYN	ENMD-981693	inhibitor	ChemblInteractions
LYN	LYN	Definite	LYN	BOSUTINIB	inhibitor	ChemblInteractions|GuideToPharmacology
LYN	LYN	Definite	LYN	ALSTERPAULLONE		DTC
LYN	LYN	Definite	LYN	CEDIRANIB		DTC
LYN	LYN	Definite	LYN	AZD-1152-HQPA		DTC
LYN	LYN	Definite	LYN	GEFITINIB		DTC
LYN	LYN	Definite	LYN	DOVITINIB		DTC
LYN	LYN	Definite	LYN	OSI-632		DTC
LYN	LYN	Definite	LYN	SP-600125		DTC
LYN	LYN	Definite	LYN	TG100-801	inhibitor	ChemblInteractions
LYN	LYN	Definite	LYN	ERLOTINIB		DTC
LYN	LYN	Definite	LYN	DASATINIB	inhibitor	ChemblInteractions	18180381
LYN	LYN	Definite	LYN	CHEMBL578061		DTC
LYN	LYN	Definite	LYN	TAE-684		DTC
LYN	LYN	Definite	LYN	NILOTINIB		CIViC	18191450
RTN4	RTN4	Definite	RTN4	OZANEZUMAB	antibody|inhibitor	ChemblInteractions|GuideToPharmacology
RTN4	RTN4	Definite	RTN4	ATINUMAB		TTD	22544872
HSP90AA2P	HSP90AA2P	Definite	HSP90AA2P	GANETESPIB	inhibitor	MyCancerGenome
HSP90AA2P	HSP90AA2P	Definite	HSP90AA2P	RETASPIMYCIN HYDROCHLORIDE		TdgClinicalTrial
HSP90AA2P	HSP90AA2P	Definite	HSP90AA2P	RETASPIMYCIN	inhibitor	MyCancerGenome|TdgClinicalTrial
HSP90AA2P	HSP90AA2P	Definite	HSP90AA2P	TANESPIMYCIN	inhibitor	MyCancerGenome
KMT2E	KMT2E	Definite	KMT2E	DULOXETINE		PharmGKB	28696415
PRKD3	PRKD3	Definite	PRKD3	CENISERTIB		DTC
PRKD3	PRKD3	Definite	PRKD3	SOTRASTAURIN	inhibitor	ChemblInteractions
PRKD3	PRKD3	Definite	PRKD3	GEFITINIB		DTC
PRKD3	PRKD3	Definite	PRKD3	BMS-387032		DTC
PRKD3	PRKD3	Definite	PRKD3	GW441756X		DTC
PRKD3	PRKD3	Definite	PRKD3	CHEMBL541400		DTC
PRKD3	PRKD3	Definite	PRKD3	R-1487		DTC
PRKD3	PRKD3	Definite	PRKD3	R-406		DTC
PRKD3	PRKD3	Definite	PRKD3	JNJ-7706621		DTC
PRKD3	PRKD3	Definite	PRKD3	DOVITINIB		DTC
PRKD3	PRKD3	Definite	PRKD3	PF-00562271		DTC
PRKD3	PRKD3	Definite	PRKD3	ILORASERTIB		DTC
PRKD3	PRKD3	Definite	PRKD3	BRYOSTATIN		TdgClinicalTrial
PRKD3	PRKD3	Definite	PRKD3	ADAVOSERTIB		DTC
PRKD3	PRKD3	Definite	PRKD3	GATIFLOXACIN		DTC
PRKD3	PRKD3	Definite	PRKD3	UCN-01	inhibitor	ChemblInteractions
PRKD3	PRKD3	Definite	PRKD3	PD-0166285		DTC
PRKD3	PRKD3	Definite	PRKD3	GSK-690693	inhibitor	ChemblInteractions
PRKD3	PRKD3	Definite	PRKD3	QUERCETIN	inhibitor	MyCancerGenome
PRKD3	PRKD3	Definite	PRKD3	SB-242235		DTC
PRKD3	PRKD3	Definite	PRKD3	CYC-116		DTC
PRKD3	PRKD3	Definite	PRKD3	VX-702		DTC
PRKD3	PRKD3	Definite	PRKD3	TAE-684		DTC
PRKD3	PRKD3	Definite	PRKD3	SB-220025		DTC
PRKD3	PRKD3	Definite	PRKD3	PALBOCICLIB		DTC
PRKD3	PRKD3	Definite	PRKD3	SB-431542		DTC
PRKD3	PRKD3	Definite	PRKD3	CHEMBL225519		DTC
PRKD3	PRKD3	Definite	PRKD3	SP-600125		DTC
PRKD3	PRKD3	Definite	PRKD3	TAK-715		DTC
PRKD3	PRKD3	Definite	PRKD3	SB-202190		DTC
PRKD3	PRKD3	Definite	PRKD3	FASUDIL		DTC
PRKD3	PRKD3	Definite	PRKD3	CHEMBL1997335		DTC
PRKD3	PRKD3	Definite	PRKD3	GSK-269962A		DTC
PRKD3	PRKD3	Definite	PRKD3	MIDOSTAURIN	inhibitor	ChemblInteractions
PRKD3	PRKD3	Definite	PRKD3	BMS-345541		DTC
PRKD3	PRKD3	Definite	PRKD3	CHEMBL365617		DTC
PRKD3	PRKD3	Definite	PRKD3	CEP-2563	inhibitor	ChemblInteractions
MVK	MVK	Definite	MVK	ALENDRONIC ACID		PharmGKB	25223561
MVK	MVK	Definite	MVK	FARNESOL	inhibitor	GuideToPharmacology
KCNS3	KCNS3	Definite	KCNS3	GUANIDINE HYDROCHLORIDE	blocker	ChemblInteractions
KCNS3	KCNS3	Definite	KCNS3	DALFAMPRIDINE	blocker	ChemblInteractions
KCNS3	KCNS3	Definite	KCNS3	TEDISAMIL	blocker	ChemblInteractions
KCNS3	KCNS3	Definite	KCNS3	NERISPIRDINE	blocker	ChemblInteractions
RPA1	RPA1	Definite	RPA1	CHEMBL1765371		DTC	21459001
CRHR1	CRHR1	Definite	CRHR1	VERUCERFONT	antagonist	ChemblInteractions|GuideToPharmacology|TTD
CRHR1	CRHR1	Definite	CRHR1	ANTALARMIN	antagonist	GuideToPharmacology
CRHR1	CRHR1	Definite	CRHR1	CORTICOTROPIN RELEASING HORMONE	agonist	GuideToPharmacology
CRHR1	CRHR1	Definite	CRHR1	SSR125543	antagonist	ChemblInteractions|TTD
CRHR1	CRHR1	Definite	CRHR1	ONO-2333MS	antagonist	ChemblInteractions|GuideToPharmacology|TTD
CRHR1	CRHR1	Definite	CRHR1	FLUOXETINE		PharmGKB	17258395
CRHR1	CRHR1	Definite	CRHR1	SAUVAGINE	agonist	GuideToPharmacology
CRHR1	CRHR1	Definite	CRHR1	BUDESONIDE		PharmGKB	19210659|15128701|22248724|18539200
CRHR1	CRHR1	Definite	CRHR1	TELAVANCIN		TTD
CRHR1	CRHR1	Definite	CRHR1	EMICERFONT	antagonist	ChemblInteractions
CRHR1	CRHR1	Definite	CRHR1	TRIAMCINOLONE		PharmGKB	19210659|15128701|22248724|18539200
CRHR1	CRHR1	Definite	CRHR1	PEXACERFONT	antagonist	ChemblInteractions|GuideToPharmacology|TTD
FES	FES	Definite	FES	HESPERADIN	inhibitor	DTC	19035792
FES	FES	Definite	FES	LINIFANIB		DTC
FES	FES	Definite	FES	SP-600125		DTC
FES	FES	Definite	FES	LORLATINIB	inhibitor	GuideToPharmacology
FES	FES	Definite	FES	DASATINIB		DTC
CUX2	CUX2	Definite	CUX2	RIFAMPIN		PharmGKB
UCP2	UCP2	Definite	UCP2	SOYBEAN OIL		NCI	10868951
UCP2	UCP2	Definite	UCP2	HEPARIN		NCI	10868951
UCP2	UCP2	Definite	UCP2	LIOTHYRONINE SODIUM		NCI	9428737|10444435
UCP2	UCP2	Definite	UCP2	SODIUM CHLORIDE		NCI	10868951
NAT1	NAT1	Definite	NAT1	ORPHENADRINE HYDROCHLORIDE	inhibitor	ChemblInteractions
NAT1	NAT1	Definite	NAT1	PSEUDOEPHEDRINE POLISTIREX		ChemblInteractions
NAT1	NAT1	Definite	NAT1	PHENDIMETRAZINE TARTRATE	inhibitor	ChemblInteractions
NAT1	NAT1	Definite	NAT1	DASOTRALINE	inhibitor	ChemblInteractions
NAT1	NAT1	Definite	NAT1	METHYLPHENIDATE HYDROCHLORIDE	inhibitor	ChemblInteractions
NAT1	NAT1	Definite	NAT1	MAPROTILINE HYDROCHLORIDE	inhibitor	ChemblInteractions
NAT1	NAT1	Definite	NAT1	NEFAZODONE HYDROCHLORIDE	inhibitor	ChemblInteractions
NAT1	NAT1	Definite	NAT1	LEVOMILNACIPRAN HYDROCHLORIDE	inhibitor	ChemblInteractions
NAT1	NAT1	Definite	NAT1	EDIVOXETINE	inhibitor	ChemblInteractions
NAT1	NAT1	Definite	NAT1	AMPHETAMINE		ChemblInteractions
NAT1	NAT1	Definite	NAT1	MESALAMINE		PharmGKB
NAT1	NAT1	Definite	NAT1	ATOMOXETINE HYDROCHLORIDE	inhibitor	ChemblInteractions
NAT1	NAT1	Definite	NAT1	AMPHETAMINE SULFATE		ChemblInteractions
NAT1	NAT1	Definite	NAT1	DESVENLAFAXINE	inhibitor	ChemblInteractions
NAT1	NAT1	Definite	NAT1	ORPHENADRINE CITRATE	inhibitor	ChemblInteractions
NAT1	NAT1	Definite	NAT1	PSEUDOEPHEDRINE HYDROCHLORIDE		ChemblInteractions
NAT1	NAT1	Definite	NAT1	AMOXAPINE	inhibitor	ChemblInteractions
NAT1	NAT1	Definite	NAT1	METHYLPHENIDATE	inhibitor	ChemblInteractions
NAT1	NAT1	Definite	NAT1	COTININE		PharmGKB
NAT1	NAT1	Definite	NAT1	DEXTROAMPHETAMINE ADIPATE		ChemblInteractions
NAT1	NAT1	Definite	NAT1	BUPROPION HYDROCHLORIDE	inhibitor	ChemblInteractions
NAT1	NAT1	Definite	NAT1	VENLAFAXINE HYDROCHLORIDE	inhibitor	ChemblInteractions
NAT1	NAT1	Definite	NAT1	LISDEXAMFETAMINE DIMESYLATE		ChemblInteractions
NAT1	NAT1	Definite	NAT1	BUPROPION HYDROBROMIDE	inhibitor	ChemblInteractions
NAT1	NAT1	Definite	NAT1	TAPENTADOL HYDROCHLORIDE	inhibitor	ChemblInteractions
NAT1	NAT1	Definite	NAT1	DULOXETINE HYDROCHLORIDE	inhibitor	ChemblInteractions
NAT1	NAT1	Definite	NAT1	PHENYLPROPANOLAMINE HYDROCHLORIDE		ChemblInteractions
NAT1	NAT1	Definite	NAT1	THIOGUANINE		PharmGKB
NAT1	NAT1	Definite	NAT1	AMPHETAMINE ASPARTATE		ChemblInteractions
NAT1	NAT1	Definite	NAT1	PROTRIPTYLINE HYDROCHLORIDE	inhibitor	ChemblInteractions
NAT1	NAT1	Definite	NAT1	IMIPRAMINE HYDROCHLORIDE	inhibitor	ChemblInteractions
NAT1	NAT1	Definite	NAT1	MAZINDOL	inhibitor	ChemblInteractions
NAT1	NAT1	Definite	NAT1	DESVENLAFAXINE SUCCINATE	inhibitor	ChemblInteractions
NAT1	NAT1	Definite	NAT1	ASPIRIN		NCI	10547619
NAT1	NAT1	Definite	NAT1	DIETHYLPROPION HYDROCHLORIDE	inhibitor	ChemblInteractions
NAT1	NAT1	Definite	NAT1	AMITRIPTYLINE HYDROCHLORIDE	inhibitor	ChemblInteractions
NAT1	NAT1	Definite	NAT1	TRIMIPRAMINE MALEATE	inhibitor	ChemblInteractions
NAT1	NAT1	Definite	NAT1	LIAFENSINE	inhibitor	ChemblInteractions
NAT1	NAT1	Definite	NAT1	DEXTROAMPHETAMINE		ChemblInteractions
NAT1	NAT1	Definite	NAT1	NORTRIPTYLINE HYDROCHLORIDE	inhibitor	ChemblInteractions
NAT1	NAT1	Definite	NAT1	BETHANIDINE SULFATE		ChemblInteractions
NAT1	NAT1	Definite	NAT1	PHENMETRAZINE HYDROCHLORIDE	inhibitor	ChemblInteractions
NAT1	NAT1	Definite	NAT1	DOXEPIN HYDROCHLORIDE	inhibitor	ChemblInteractions
NAT1	NAT1	Definite	NAT1	DEXMETHYLPHENIDATE HYDROCHLORIDE	inhibitor	ChemblInteractions
NAT1	NAT1	Definite	NAT1	DEXTROAMPHETAMINE SULFATE		ChemblInteractions
NAT1	NAT1	Definite	NAT1	AMPHETAMINE ADIPATE		ChemblInteractions
NAT1	NAT1	Definite	NAT1	FAXELADOL	inhibitor	ChemblInteractions
NAT1	NAT1	Definite	NAT1	PHENTERMINE HYDROCHLORIDE		ChemblInteractions
NAT1	NAT1	Definite	NAT1	METHAMPHETAMINE HYDROCHLORIDE	inhibitor	ChemblInteractions
NAT1	NAT1	Definite	NAT1	TEDATIOXETINE	inhibitor	ChemblInteractions
NAT1	NAT1	Definite	NAT1	PHENYLPROPANOLAMINE POLISTIREX		ChemblInteractions
NAT1	NAT1	Definite	NAT1	DESIPRAMINE HYDROCHLORIDE	inhibitor	ChemblInteractions
NAT1	NAT1	Definite	NAT1	ESREBOXETINE	inhibitor	ChemblInteractions
NAT1	NAT1	Definite	NAT1	SIBUTRAMINE HYDROCHLORIDE	inhibitor	ChemblInteractions
NAT1	NAT1	Definite	NAT1	PHENTERMINE		ChemblInteractions
NAT1	NAT1	Definite	NAT1	BRETYLIUM TOSYLATE		ChemblInteractions
NAT1	NAT1	Definite	NAT1	BENZPHETAMINE HYDROCHLORIDE		ChemblInteractions
NAT1	NAT1	Definite	NAT1	GUANETHIDINE MONOSULFATE		ChemblInteractions
KCNN3	KCNN3	Definite	KCNN3	DEQUALINIUM	blocker	GuideToPharmacology|TTD
KCNN3	KCNN3	Definite	KCNN3	APAMIN	inhibitor	GuideToPharmacology
KCNN3	KCNN3	Definite	KCNN3	RILUZOLE	activator	GuideToPharmacology
KCNN3	KCNN3	Definite	KCNN3	TUBOCURARINE	blocker	GuideToPharmacology
MC1R	MC1R	Definite	MC1R	CORTICOTROPIN	agonist	GuideToPharmacology
MC1R	MC1R	Definite	MC1R	AFAMELANOTIDE	agonist	TdgClinicalTrial|GuideToPharmacology|TTD	30704898|16293341|26979527|28063031
MC1R	MC1R	Definite	MC1R	BREMELANOTIDE	agonist	TdgClinicalTrial|ChemblInteractions|GuideToPharmacology
MC1R	MC1R	Definite	MC1R	SETMELANOTIDE	agonist	GuideToPharmacology
MC1R	MC1R	Definite	MC1R	MODIMELANOTIDE	agonist	ChemblInteractions
MC1R	MC1R	Definite	MC1R	DESIPRAMINE		PharmGKB	21052032
TUBB3	TUBB3	Definite	TUBB3	SAGOPILONE		ChemblInteractions
TUBB3	TUBB3	Definite	TUBB3	PODOFILOX		DTC	17765552|24953821|21402478
TUBB3	TUBB3	Definite	TUBB3	PACLITAXEL	inhibitor	DTC|ClearityFoundationBiomarkers|ChemblInteractions|CGI	23631389|25369367|25768699|24457094|22595423|23313639|17887662|23387901|19758808|23725535|24953821
TUBB3	TUBB3	Definite	TUBB3	CHEMBL1935538		DTC	22435708
TUBB3	TUBB3	Definite	TUBB3	VORINOSTAT		DTC	20491440
TUBB3	TUBB3	Definite	TUBB3	BRENTUXIMAB VEDOTIN	inhibitor	ChemblInteractions
TUBB3	TUBB3	Definite	TUBB3	ERIBULIN MESYLATE	inhibitor	ChemblInteractions
TUBB3	TUBB3	Definite	TUBB3	IXABEPILONE	inhibitor	TdgClinicalTrial|ChemblInteractions	18945860|18378531|18321240
TUBB3	TUBB3	Definite	TUBB3	CHEMBL453818		DTC	12141877
TUBB3	TUBB3	Definite	TUBB3	MAYTANSINE		DTC	563462
TUBB3	TUBB3	Definite	TUBB3	CHEMBL2036119		DTC	22543234
TUBB3	TUBB3	Definite	TUBB3	TRASTUZUMAB EMTANSINE	inhibitor	ChemblInteractions
TUBB3	TUBB3	Definite	TUBB3	VINCRISTINE SULFATE	inhibitor	ChemblInteractions
TUBB3	TUBB3	Definite	TUBB3	LARGAZOLE		DTC	20491440
TUBB3	TUBB3	Definite	TUBB3	COLCHICINE	inhibitor	DTC|ChemblInteractions	23750455|25805446|24502232|25061803|25937236|24773591|25938266
TUBB3	TUBB3	Definite	TUBB3	CABAZITAXEL	inhibitor	ChemblInteractions
TUBB3	TUBB3	Definite	TUBB3	VINFLUNINE	inhibitor	ChemblInteractions
TUBB3	TUBB3	Definite	TUBB3	CHEMBL1795737		DTC	21664138
TUBB3	TUBB3	Definite	TUBB3	CYCLOSTREPTIN		DTC	17206139
TUBB3	TUBB3	Definite	TUBB3	VINORELBINE		DTC	25768699
TUBB3	TUBB3	Definite	TUBB3	CROLIBULIN	inhibitor	ChemblInteractions
TUBB3	TUBB3	Definite	TUBB3	MAYTANSINOL		DTC	563462
TUBB3	TUBB3	Definite	TUBB3	LEXIBULIN	inhibitor	ChemblInteractions
TUBB3	TUBB3	Definite	TUBB3	CURCUMIN		DTC	23830698
TUBB3	TUBB3	Definite	TUBB3	FOSBRETABULIN TROMETHAMINE		ChemblInteractions
TUBB3	TUBB3	Definite	TUBB3	CHEMBL2036124		DTC	22543234
TUBB3	TUBB3	Definite	TUBB3	VINORELBINE TARTRATE	inhibitor	ChemblInteractions
TUBB3	TUBB3	Definite	TUBB3	INDIBULIN	inhibitor	ChemblInteractions
TUBB3	TUBB3	Definite	TUBB3	ZAMPANOLIDE		DTC	19877653
TUBB3	TUBB3	Definite	TUBB3	NOCODAZOLE		DTC	21194809|25815147|25369367|25262051|23313639
TUBB3	TUBB3	Definite	TUBB3	PLINABULIN	inhibitor	ChemblInteractions
TUBB3	TUBB3	Definite	TUBB3	VERUBULIN		ChemblInteractions
TUBB3	TUBB3	Definite	TUBB3	DOCETAXEL		ClearityFoundationBiomarkers
TUBB3	TUBB3	Definite	TUBB3	DOCETAXEL	inhibitor	ChemblInteractions
TUBB3	TUBB3	Definite	TUBB3	DAVUNETIDE		ChemblInteractions
TUBB3	TUBB3	Definite	TUBB3	VINCRISTINE		DTC	16539377|21664138|23916255
TUBB3	TUBB3	Definite	TUBB3	VINBLASTINE SULFATE	inhibitor	ChemblInteractions
TUBB3	TUBB3	Definite	TUBB3	VINBLASTINE		DTC	23708010|23916255
TUBB3	TUBB3	Definite	TUBB3	COMBRETASTATIN A4		DTC	23631389|16913727|22543234|25584687|24669888|17765552|25192811
TUBB3	TUBB3	Definite	TUBB3	ABT-751		DTC	25468039
TUBB3	TUBB3	Definite	TUBB3	PACLITAXEL POLIGLUMEX		ChemblInteractions
TUBB3	TUBB3	Definite	TUBB3	FOSBRETABULIN DISODIUM	inhibitor	ChemblInteractions
GFAP	GFAP	Definite	GFAP	ISOPROTERENOL		NCI	8381971
GFAP	GFAP	Definite	GFAP	PROPRANOLOL		NCI	15328477
GFAP	GFAP	Definite	GFAP	ASPIRIN		NCI	17194886
GFAP	GFAP	Definite	GFAP	PENTOXIFYLLINE		NCI	12898537
GFAP	GFAP	Definite	GFAP	DRONABINOL		NCI	10965147
GFAP	GFAP	Definite	GFAP	COLCHICINE		NCI	10211779|15307907
GFAP	GFAP	Definite	GFAP	DISULFIRAM		NCI	1992564
GFAP	GFAP	Definite	GFAP	NIFEDIPINE		NCI	10222112|7615340|7600665
GFAP	GFAP	Definite	GFAP	NIMODIPINE		NCI	9192289
GFAP	GFAP	Definite	GFAP	METHIMAZOLE		NCI	10375702
GFAP	GFAP	Definite	GFAP	STAUROSPORINE		NCI	1720762
GFAP	GFAP	Definite	GFAP	PERMETHRIN		NCI	14555407
GFAP	GFAP	Definite	GFAP	SORBITOL		NCI	11968061
GFAP	GFAP	Definite	GFAP	PROGESTERONE		NCI	9370212
GFAP	GFAP	Definite	GFAP	OPRELVEKIN		NCI	10737606
GFAP	GFAP	Definite	GFAP	FADROZOLE		NCI	15390121
GFAP	GFAP	Definite	GFAP	LITHIUM		NCI	15056276
GFAP	GFAP	Definite	GFAP	PRASTERONE		NCI	14973190
GFAP	GFAP	Definite	GFAP	MELATONIN		NCI	10877823
GFAP	GFAP	Definite	GFAP	CAFFEINE		NCI	15260132
GFAP	GFAP	Definite	GFAP	DEMECOLCINE		NCI	3886082
GFAP	GFAP	Definite	GFAP	CAPSAICIN		NCI	15076747
GFAP	GFAP	Definite	GFAP	AMPHETAMINE		NCI	7569352|15044042
GFAP	GFAP	Definite	GFAP	GENISTEIN		NCI	10629745
GFAP	GFAP	Definite	GFAP	PIOGLITAZONE		NCI	15649489
ATXN2	ATXN2	Definite	ATXN2	CHEMBL581152		DTC
ATXN2	ATXN2	Definite	ATXN2	9,10-PHENANTHRENEQUINONE		DTC
ATXN2	ATXN2	Definite	ATXN2	CHEMBL1256660		DTC
ATXN2	ATXN2	Definite	ATXN2	PYRITHIONE		DTC
ATXN2	ATXN2	Definite	ATXN2	CHEMBL1306556		DTC
ATXN2	ATXN2	Definite	ATXN2	CHEMBL578502		DTC
ATXN2	ATXN2	Definite	ATXN2	R-N-PROPYLNORAPOMORPHINE		DTC
ATXN2	ATXN2	Definite	ATXN2	CHEMBL549208		DTC
ATXN2	ATXN2	Definite	ATXN2	SANGUINARIUM		DTC
ATXN2	ATXN2	Definite	ATXN2	ERBSTATIN		DTC
ATXN2	ATXN2	Definite	ATXN2	RALOXIFENE		DTC
ATXN2	ATXN2	Definite	ATXN2	CHEMBL582699		DTC
ATXN2	ATXN2	Definite	ATXN2	CYCLOVALONE		DTC
ATXN2	ATXN2	Definite	ATXN2	CHEMBL580340		DTC
ATXN2	ATXN2	Definite	ATXN2	CHEMBL291143		DTC
ATXN2	ATXN2	Definite	ATXN2	GEOPYXIN A		DTC
ATXN2	ATXN2	Definite	ATXN2	AMSACRINE		DTC
ATXN2	ATXN2	Definite	ATXN2	DOXORUBICIN HYDROCHLORIDE		DTC
ATXN2	ATXN2	Definite	ATXN2	GEDUNIN		DTC
ATXN2	ATXN2	Definite	ATXN2	CHEMBL515505		DTC
ATXN2	ATXN2	Definite	ATXN2	PD-173074		DTC
ATXN2	ATXN2	Definite	ATXN2	CHEMBL1902074		DTC
ATXN2	ATXN2	Definite	ATXN2	PIPLARTINE		DTC
ATXN2	ATXN2	Definite	ATXN2	MEFLOQUINE HYDROCHLORIDE		DTC
ATXN2	ATXN2	Definite	ATXN2	CHEMBL288174		DTC
ATXN2	ATXN2	Definite	ATXN2	AROMOLINE		DTC
ATXN2	ATXN2	Definite	ATXN2	CHEMBL592316		DTC
ATXN2	ATXN2	Definite	ATXN2	NICARDIPINE		DTC
ATXN2	ATXN2	Definite	ATXN2	CHEMBL1701915		DTC
ATXN2	ATXN2	Definite	ATXN2	CHEMBL458094		DTC
ATXN2	ATXN2	Definite	ATXN2	KAMEBANIN		DTC
ATXN2	ATXN2	Definite	ATXN2	(R,S)-INDATRALINE		DTC
ATXN2	ATXN2	Definite	ATXN2	ENPIROLINE		DTC
ATXN2	ATXN2	Definite	ATXN2	CHEMBL533602		DTC
ATXN2	ATXN2	Definite	ATXN2	ALOXISTATIN		DTC
ATXN2	ATXN2	Definite	ATXN2	CHEMBL546493		DTC
ATXN2	ATXN2	Definite	ATXN2	PERPHENAZINE		DTC
ATXN2	ATXN2	Definite	ATXN2	CHEMBL600734		DTC
ATXN2	ATXN2	Definite	ATXN2	CHEMBL578512		DTC
ATXN2	ATXN2	Definite	ATXN2	MITOXANTRONE		DTC
ATXN2	ATXN2	Definite	ATXN2	T091317		DTC
ATXN2	ATXN2	Definite	ATXN2	(S)-ROSCOVITINE		DTC
ATXN2	ATXN2	Definite	ATXN2	CHEMBL299853		DTC
ATXN2	ATXN2	Definite	ATXN2	THIRAM		DTC
ATXN2	ATXN2	Definite	ATXN2	CHEMBL532160		DTC
ATXN2	ATXN2	Definite	ATXN2	LASALOCID A SODIUM		DTC
ATXN2	ATXN2	Definite	ATXN2	CHEMBL586135		DTC
ATXN2	ATXN2	Definite	ATXN2	CHEMBL1255834		DTC
ATXN2	ATXN2	Definite	ATXN2	SCLEROTIORIN		DTC
ATXN2	ATXN2	Definite	ATXN2	CHEMBL607309		DTC
ATXN2	ATXN2	Definite	ATXN2	CHEMBL1576310		DTC
ATXN2	ATXN2	Definite	ATXN2	CHEMBL591404		DTC
ATXN2	ATXN2	Definite	ATXN2	CHEMBL1287983		DTC
ATXN2	ATXN2	Definite	ATXN2	CHEMBL1392894		DTC
ATXN2	ATXN2	Definite	ATXN2	CHEMBL17201		DTC
ATXN2	ATXN2	Definite	ATXN2	CHEMBL461579		DTC
ATXN2	ATXN2	Definite	ATXN2	CAMPTOTHECIN		DTC
ATXN2	ATXN2	Definite	ATXN2	CHEMBL604321		DTC
ATXN2	ATXN2	Definite	ATXN2	PYRONIN Y		DTC
ATXN2	ATXN2	Definite	ATXN2	PROADIFEN HYDROCHLORIDE		DTC
ATXN2	ATXN2	Definite	ATXN2	MITOXANTRONE HYDROCHLORIDE		DTC
ATXN2	ATXN2	Definite	ATXN2	CUCURBITACIN B		DTC
ATXN2	ATXN2	Definite	ATXN2	FLUOXETINE HYDROCHLORIDE		DTC
ATXN2	ATXN2	Definite	ATXN2	ANGUSTIBALIN		DTC
ATXN2	ATXN2	Definite	ATXN2	MAPROTILINE		DTC
ATXN2	ATXN2	Definite	ATXN2	CHLORPROMAZINE HYDROCHLORIDE		DTC
ATXN2	ATXN2	Definite	ATXN2	CHEMBL589715		DTC
ATXN2	ATXN2	Definite	ATXN2	VANOXERINE		DTC
ATXN2	ATXN2	Definite	ATXN2	FENRETINIDE		DTC
ATXN2	ATXN2	Definite	ATXN2	CHEMBL588038		DTC
ATXN2	ATXN2	Definite	ATXN2	HYCANTHONE		DTC
ATXN2	ATXN2	Definite	ATXN2	CHEMBL601757		DTC
ATXN2	ATXN2	Definite	ATXN2	GERONTOXANTHONE H		DTC
ATXN2	ATXN2	Definite	ATXN2	CLOTRIMAZOLE		DTC
ATXN2	ATXN2	Definite	ATXN2	CHEMBL531268		DTC
ATXN2	ATXN2	Definite	ATXN2	CLOFOCTOL		DTC
ATXN2	ATXN2	Definite	ATXN2	CHELERYTHRINE		DTC
ATXN2	ATXN2	Definite	ATXN2	CUDRAFLAVONE B		DTC
ATXN2	ATXN2	Definite	ATXN2	CHEMBL589245		DTC
ATXN2	ATXN2	Definite	ATXN2	TUBERCIDIN		DTC
ATXN2	ATXN2	Definite	ATXN2	DEPHOSTATIN		DTC
ATXN2	ATXN2	Definite	ATXN2	AFIMOXIFENE		DTC
ATXN2	ATXN2	Definite	ATXN2	CHEMBL586937		DTC
ATXN2	ATXN2	Definite	ATXN2	CHEMBL505670		DTC
ATXN2	ATXN2	Definite	ATXN2	SERTRALINE HYDROCHLORIDE		DTC
ATXN2	ATXN2	Definite	ATXN2	CYCLOSPORINE		DTC
ATXN2	ATXN2	Definite	ATXN2	SORAFENIB TOSYLATE		DTC
ATXN2	ATXN2	Definite	ATXN2	TYRPHOSTIN A9		DTC
ATXN2	ATXN2	Definite	ATXN2	A-443654		DTC
ATXN2	ATXN2	Definite	ATXN2	CHEMBL579318		DTC
ATXN2	ATXN2	Definite	ATXN2	CHEMBL599098		DTC
ATXN2	ATXN2	Definite	ATXN2	THONZONIUM BROMIDE		DTC
ATXN2	ATXN2	Definite	ATXN2	BENZETHONIUM CHLORIDE		DTC
ATXN2	ATXN2	Definite	ATXN2	CHEMBL515617		DTC
ATXN2	ATXN2	Definite	ATXN2	OSAJIN		DTC
ATXN2	ATXN2	Definite	ATXN2	CP-55940		DTC
ATXN2	ATXN2	Definite	ATXN2	CHEMBL585502		DTC
ATXN2	ATXN2	Definite	ATXN2	SERTRALINE		DTC
ATXN2	ATXN2	Definite	ATXN2	CHEMBL569864		DTC
ATXN2	ATXN2	Definite	ATXN2	ECONAZOLE NITRATE		DTC
ATXN2	ATXN2	Definite	ATXN2	KEPONE		DTC
ATXN2	ATXN2	Definite	ATXN2	NORTRIPTYLINE		DTC
ATXN2	ATXN2	Definite	ATXN2	SU-9516		DTC
ATXN2	ATXN2	Definite	ATXN2	CHLORHEXIDINE		DTC
ATXN2	ATXN2	Definite	ATXN2	DOCEBENONE		DTC
ATXN2	ATXN2	Definite	ATXN2	QUINESTROL		DTC
ATXN2	ATXN2	Definite	ATXN2	CHEMBL596633		DTC
ATXN2	ATXN2	Definite	ATXN2	THIOTHIXENE		DTC
ATXN2	ATXN2	Definite	ATXN2	CHEMBL73711		DTC
ATXN2	ATXN2	Definite	ATXN2	SAQUINAVIR MESYLATE		DTC
ATXN2	ATXN2	Definite	ATXN2	TETRABROMOBENZOTRIAZOLE		DTC
ATXN2	ATXN2	Definite	ATXN2	CHEMBL536375		DTC
ATXN2	ATXN2	Definite	ATXN2	CHEMBL546597		DTC
ATXN2	ATXN2	Definite	ATXN2	CHEMBL596380		DTC
ATXN2	ATXN2	Definite	ATXN2	CHEMBL576208		DTC
ATXN2	ATXN2	Definite	ATXN2	CHEMBL523200		DTC
ATXN2	ATXN2	Definite	ATXN2	CHEMBL585656		DTC
ATXN2	ATXN2	Definite	ATXN2	THAPSIGARGIN		DTC
ATXN2	ATXN2	Definite	ATXN2	CHEMBL600747		DTC
ATXN2	ATXN2	Definite	ATXN2	CHEMBL1465049		DTC
ATXN2	ATXN2	Definite	ATXN2	CHEMBL223575		DTC
ATXN2	ATXN2	Definite	ATXN2	CHEMBL1546228		DTC
ATXN2	ATXN2	Definite	ATXN2	TRIFLUOPERAZINE HYDROCHLORIDE		DTC
ATXN2	ATXN2	Definite	ATXN2	HELENALIN		DTC
ATXN2	ATXN2	Definite	ATXN2	VINBLASTINE SULFATE		DTC
ATXN2	ATXN2	Definite	ATXN2	CHEMBL1519374		DTC
ATXN2	ATXN2	Definite	ATXN2	TANSHINONE I		DTC
ATXN2	ATXN2	Definite	ATXN2	FLUPENTIXOL		DTC
ATXN2	ATXN2	Definite	ATXN2	NORDIHYDROGUAIARETIC ACID		DTC
ATXN2	ATXN2	Definite	ATXN2	MENADIONE		DTC
ATXN2	ATXN2	Definite	ATXN2	PROCHLORPERAZINE		DTC
ATXN2	ATXN2	Definite	ATXN2	PYROGALLOL RED		DTC
ATXN2	ATXN2	Definite	ATXN2	CHEMBL576362		DTC
ATXN2	ATXN2	Definite	ATXN2	N-DESMETHYLCLOZAPINE		DTC
ATXN2	ATXN2	Definite	ATXN2	CALMIDAZOLIUM CHLORIDE		DTC
ATXN2	ATXN2	Definite	ATXN2	CHEMBL578257		DTC
ATXN2	ATXN2	Definite	ATXN2	CHEMBL603952		DTC
ATXN2	ATXN2	Definite	ATXN2	CHEMBL1343568		DTC
ATXN2	ATXN2	Definite	ATXN2	CHEMBL587849		DTC
ATXN2	ATXN2	Definite	ATXN2	THIORIDAZINE HYDROCHLORIDE		DTC
ATXN2	ATXN2	Definite	ATXN2	CHEMBL1889303		DTC
ATXN2	ATXN2	Definite	ATXN2	NANAOMYCIN		DTC
ATXN2	ATXN2	Definite	ATXN2	EMETINE		DTC
ATXN2	ATXN2	Definite	ATXN2	CHEMBL599924		DTC
ATXN2	ATXN2	Definite	ATXN2	PARAROSANILINE		DTC
ATXN2	ATXN2	Definite	ATXN2	CHEMBL1503190		DTC
ATXN2	ATXN2	Definite	ATXN2	CHEMBL86464		DTC
ATXN2	ATXN2	Definite	ATXN2	PHENANTHROLINE		DTC
ATXN2	ATXN2	Definite	ATXN2	CHEMBL429095		DTC
ATXN2	ATXN2	Definite	ATXN2	TAMOXIFEN		DTC
ATXN2	ATXN2	Definite	ATXN2	PROTOAPIGENONE		DTC
ATXN2	ATXN2	Definite	ATXN2	CHEMBL1362503		DTC
ATXN2	ATXN2	Definite	ATXN2	CHEMBL1334191		DTC
ATXN2	ATXN2	Definite	ATXN2	CHEMBL1415851		DTC
ATXN2	ATXN2	Definite	ATXN2	CHEMBL1526167		DTC
ATXN2	ATXN2	Definite	ATXN2	CHEMBL582473		DTC
ATXN2	ATXN2	Definite	ATXN2	CHEMBL530049		DTC
ATXN2	ATXN2	Definite	ATXN2	CHEMBL580819		DTC
ATXN2	ATXN2	Definite	ATXN2	CALCIMYCIN		DTC
ATXN2	ATXN2	Definite	ATXN2	CHEMBL1606		DTC
ATXN2	ATXN2	Definite	ATXN2	BROMOENOL LACTONE		DTC
ATXN2	ATXN2	Definite	ATXN2	CHEMBL1546223		DTC
ATXN2	ATXN2	Definite	ATXN2	CHEMBL534535		DTC
ATXN2	ATXN2	Definite	ATXN2	FENDILINE HYDROCHLORIDE		DTC
ATXN2	ATXN2	Definite	ATXN2	SB-242084		DTC
ATXN2	ATXN2	Definite	ATXN2	CHEMBL1481509		DTC
ATXN2	ATXN2	Definite	ATXN2	CHEMBL578944		DTC
ATXN2	ATXN2	Definite	ATXN2	TOLONIUM CHLORIDE		DTC
ATXN2	ATXN2	Definite	ATXN2	XANTHOANGELOL F		DTC
ATXN2	ATXN2	Definite	ATXN2	OXYPHENBUTAZONE		DTC
ATXN2	ATXN2	Definite	ATXN2	CLEMASTINE FUMARATE		DTC
ATXN2	ATXN2	Definite	ATXN2	NIFEDIPINE		DTC
ATXN2	ATXN2	Definite	ATXN2	CHEMBL590168		DTC
ATXN2	ATXN2	Definite	ATXN2	NELFINAVIR MESYLATE		DTC
ATXN2	ATXN2	Definite	ATXN2	CHEMBL602946		DTC
ATXN2	ATXN2	Definite	ATXN2	MIBEFRADIL		DTC
ATXN2	ATXN2	Definite	ATXN2	ISOVELLERAL		DTC
ATXN2	ATXN2	Definite	ATXN2	CHEMBL600908		DTC
ATXN2	ATXN2	Definite	ATXN2	SPHAEROPSIDIN A		DTC
ATXN2	ATXN2	Definite	ATXN2	CHEMBL601364		DTC
ATXN2	ATXN2	Definite	ATXN2	CHEMBL493863		DTC
ATXN2	ATXN2	Definite	ATXN2	THIMEROSAL		DTC
ATXN2	ATXN2	Definite	ATXN2	GR-127935		DTC
ATXN2	ATXN2	Definite	ATXN2	CHEMBL81782		DTC
ATXN2	ATXN2	Definite	ATXN2	IDARUBICIN HYDROCHLORIDE		DTC
ATXN2	ATXN2	Definite	ATXN2	FANGCHINOLINE		DTC
ATXN2	ATXN2	Definite	ATXN2	ENNIATIN B		DTC
ATXN2	ATXN2	Definite	ATXN2	CHEMBL600353		DTC
ATXN2	ATXN2	Definite	ATXN2	PIMOZIDE		DTC
ATXN2	ATXN2	Definite	ATXN2	N-AMINOHEXYL-5-CHLORO-1-NAPTHALENESULFONAMIDE HYDROCHLORIDE		DTC
ATXN2	ATXN2	Definite	ATXN2	LAPACHONE		DTC
ATXN2	ATXN2	Definite	ATXN2	CLOROTEPINE		DTC
ATXN2	ATXN2	Definite	ATXN2	CHEMBL607253		DTC
ATXN2	ATXN2	Definite	ATXN2	METHIOTHEPIN MESYLATE		DTC
ATXN2	ATXN2	Definite	ATXN2	CHEMBL2094789		DTC
ATXN2	ATXN2	Definite	ATXN2	HONOKIOL		DTC
ATXN2	ATXN2	Definite	ATXN2	CHEMBL2095095		DTC
ATXN2	ATXN2	Definite	ATXN2	TPCK		DTC
ATXN2	ATXN2	Definite	ATXN2	PROPYLPYRAZOLETRIOL		DTC
ATXN2	ATXN2	Definite	ATXN2	AURIN		DTC
ATXN2	ATXN2	Definite	ATXN2	CHEMBL585591		DTC
ATXN2	ATXN2	Definite	ATXN2	CHEMBL1549738		DTC
ATXN2	ATXN2	Definite	ATXN2	CHEMBL591126		DTC
ATXN2	ATXN2	Definite	ATXN2	CHEMBL403183		DTC
ATXN2	ATXN2	Definite	ATXN2	FANCHININ		DTC
ATXN2	ATXN2	Definite	ATXN2	CHEMBL579045		DTC
ATXN2	ATXN2	Definite	ATXN2	SERTACONAZOLE NITRATE		DTC
ATXN2	ATXN2	Definite	ATXN2	CHEMBL609606		DTC
ATXN2	ATXN2	Definite	ATXN2	TRIFLUOPERAZINE		DTC
ATXN2	ATXN2	Definite	ATXN2	CHEMBL590686		DTC
ATXN2	ATXN2	Definite	ATXN2	THIORIDAZINE		DTC
ATXN2	ATXN2	Definite	ATXN2	CHEMBL116548		DTC
ATXN2	ATXN2	Definite	ATXN2	EPIRUBICIN HYDROCHLORIDE		DTC
ATXN2	ATXN2	Definite	ATXN2	CHEMBL482050		DTC
ATXN2	ATXN2	Definite	ATXN2	CHEMBL1567571		DTC
ATXN2	ATXN2	Definite	ATXN2	CHEMBL461193		DTC
ATXN2	ATXN2	Definite	ATXN2	PROMETHAZINE		DTC
ATXN2	ATXN2	Definite	ATXN2	CEPHARANTHINE		DTC
ATXN2	ATXN2	Definite	ATXN2	PAROXETINE		DTC
ATXN2	ATXN2	Definite	ATXN2	TEGASEROD MALEATE		DTC
ATXN2	ATXN2	Definite	ATXN2	METHIXENE HYDROCHLORIDE		DTC
ATXN2	ATXN2	Definite	ATXN2	SAQUINAVIR		DTC
ATXN2	ATXN2	Definite	ATXN2	METITEPINE		DTC
ATXN2	ATXN2	Definite	ATXN2	CHEMBL1287980		DTC
ATXN2	ATXN2	Definite	ATXN2	APOMORPHINE HYDROCHLORIDE HEMIHYDRATE		DTC
ATXN2	ATXN2	Definite	ATXN2	CHEMBL576409		DTC
ATXN2	ATXN2	Definite	ATXN2	XANTHOANGELOL		DTC
ATXN2	ATXN2	Definite	ATXN2	GOSSYPOL		DTC
ATXN2	ATXN2	Definite	ATXN2	ENCLOMIPHENE		DTC
ATXN2	ATXN2	Definite	ATXN2	FLUOXETINE		DTC
ATXN2	ATXN2	Definite	ATXN2	PERHEXILINE MALEATE		DTC
ATXN2	ATXN2	Definite	ATXN2	IDARUBICIN		DTC
ATXN2	ATXN2	Definite	ATXN2	NICLOSAMIDE		DTC
ATXN2	ATXN2	Definite	ATXN2	STREPTONIGRIN		DTC
ATXN2	ATXN2	Definite	ATXN2	PAROXETINE HYDROCHLORIDE		DTC
ATXN2	ATXN2	Definite	ATXN2	ENCLOMIPHENE CITRATE		DTC
ATXN2	ATXN2	Definite	ATXN2	CARMINIC ACID		DTC
ATXN2	ATXN2	Definite	ATXN2	CHEMBL1169388		DTC
ATXN2	ATXN2	Definite	ATXN2	OLEOYL DOPAMINE		DTC
ATXN2	ATXN2	Definite	ATXN2	CANTHARIDIC_ACID		DTC
ATXN2	ATXN2	Definite	ATXN2	CHEMBL578915		DTC
ATXN2	ATXN2	Definite	ATXN2	CHEMBL586024		DTC
ATXN2	ATXN2	Definite	ATXN2	BAY-11-7085		DTC
ATXN2	ATXN2	Definite	ATXN2	ALEXIDINE HYDROCHLORIDE		DTC
ATXN2	ATXN2	Definite	ATXN2	LOBARIC ACID		DTC
ATXN2	ATXN2	Definite	ATXN2	CHEMBL528694		DTC
ATXN2	ATXN2	Definite	ATXN2	CHEMBL528712		DTC
ATXN2	ATXN2	Definite	ATXN2	INDIRUBIN-3-MONOXIME		DTC
ATXN2	ATXN2	Definite	ATXN2	CHEMBL591834		DTC
ATXN2	ATXN2	Definite	ATXN2	CHEMBL309760		DTC
ATXN2	ATXN2	Definite	ATXN2	FLAVOKAWAIN B		DTC
ATXN2	ATXN2	Definite	ATXN2	CHEMBL589694		DTC
SLC22A7	SLC22A7	Definite	SLC22A7	CAPECITABINE		PharmGKB	28347776
SLC22A7	SLC22A7	Definite	SLC22A7	ZIDOVUDINE		PharmGKB	22960662
SLC22A7	SLC22A7	Definite	SLC22A7	GS-9256		DTC	22244938
FOXO3	FOXO3	Definite	FOXO3	RESVERATROL		DTC	17513867
FOXO3	FOXO3	Definite	FOXO3	SYRINGARESINOL		DTC	25479772
CYP2D6	CYP2D6	Definite	CYP2D6	CLEBOPRIDE		DTC
CYP2D6	CYP2D6	Definite	CYP2D6	CHEMBL31741		DTC
CYP2D6	CYP2D6	Definite	CYP2D6	RANITIDINE		DTC	22931300
CYP2D6	CYP2D6	Definite	CYP2D6	DOXORUBICIN		DTC	22931300
CYP2D6	CYP2D6	Definite	CYP2D6	PARAROSANILINE		DTC
CYP2D6	CYP2D6	Definite	CYP2D6	FLUNISOLIDE		DTC	22931300
CYP2D6	CYP2D6	Definite	CYP2D6	TRIMIPRAMINE		PharmGKB|FDA	9918137|20531370|1346258|15252821|14716707|18359183|14520122|8867869|8181196|17721180|1527229|17667959|15115913|12360109|14646691|15205367|11682257|16024198|10774635|16361630|17008819|23486447|10460069|9585799|16871470
CYP2D6	CYP2D6	Definite	CYP2D6	KETOROLAC		PharmGKB	17986163
CYP2D6	CYP2D6	Definite	CYP2D6	NS-398		DTC
CYP2D6	CYP2D6	Definite	CYP2D6	CAPSAZEPINE		DTC
CYP2D6	CYP2D6	Definite	CYP2D6	TICRYNAFEN		DTC	22931300
CYP2D6	CYP2D6	Definite	CYP2D6	ALCOHOL		PharmGKB	24611668
CYP2D6	CYP2D6	Definite	CYP2D6	QUETIAPINE		PharmGKB	29472872|16871470
CYP2D6	CYP2D6	Definite	CYP2D6	METHOXSALEN		DTC
CYP2D6	CYP2D6	Definite	CYP2D6	MODAFINIL		DTC|NCI|PharmGKB|FDA	22931300|10820139
CYP2D6	CYP2D6	Definite	CYP2D6	BERGAPTEN		DTC
CYP2D6	CYP2D6	Definite	CYP2D6	TAMSULOSIN		PharmGKB|FDA
CYP2D6	CYP2D6	Definite	CYP2D6	CHEMBL20377		DTC
CYP2D6	CYP2D6	Definite	CYP2D6	PITOLISANT		PharmGKB|FDA
CYP2D6	CYP2D6	Definite	CYP2D6	AGROCLAVINE		DTC
CYP2D6	CYP2D6	Definite	CYP2D6	BUFLOMEDIL		DTC
CYP2D6	CYP2D6	Definite	CYP2D6	THONZONIUM		DTC
CYP2D6	CYP2D6	Definite	CYP2D6	VALPROIC ACID		DTC	22931300
CYP2D6	CYP2D6	Definite	CYP2D6	ERYTHROMYCIN		DTC	22931300
CYP2D6	CYP2D6	Definite	CYP2D6	SELEGILINE		DTC	22931300
CYP2D6	CYP2D6	Definite	CYP2D6	PAROXETINE		FDA
CYP2D6	CYP2D6	Definite	CYP2D6	ALVERINE CITRATE		DTC
CYP2D6	CYP2D6	Definite	CYP2D6	BENPERIDOL		DTC
CYP2D6	CYP2D6	Definite	CYP2D6	DEGUELIN		DTC
CYP2D6	CYP2D6	Definite	CYP2D6	METHOCARBAMOL		DTC	22931300
CYP2D6	CYP2D6	Definite	CYP2D6	GRAMINE		DTC
CYP2D6	CYP2D6	Definite	CYP2D6	DIPYRIDAMOLE		DTC
CYP2D6	CYP2D6	Definite	CYP2D6	ASARININ		DTC
CYP2D6	CYP2D6	Definite	CYP2D6	PIMETHIXENE		DTC
CYP2D6	CYP2D6	Definite	CYP2D6	DIAZOXIDE		DTC
CYP2D6	CYP2D6	Definite	CYP2D6	(R)-FLECAINIDE		DTC
CYP2D6	CYP2D6	Definite	CYP2D6	AZITHROMYCIN		DTC	22931300
CYP2D6	CYP2D6	Definite	CYP2D6	CHEMBL123904		DTC
CYP2D6	CYP2D6	Definite	CYP2D6	MEPIVACAINE		DTC	22931300
CYP2D6	CYP2D6	Definite	CYP2D6	CHEMBL1079460		DTC
CYP2D6	CYP2D6	Definite	CYP2D6	CLOTRIMAZOLE		DTC
CYP2D6	CYP2D6	Definite	CYP2D6	ZOXAZOLAMINE		DTC	22931300
CYP2D6	CYP2D6	Definite	CYP2D6	CHEMBL429095		DTC
CYP2D6	CYP2D6	Definite	CYP2D6	ELLIPTECINE		DTC
CYP2D6	CYP2D6	Definite	CYP2D6	TOLPERISONE		PharmGKB	25953735
CYP2D6	CYP2D6	Definite	CYP2D6	SB-224289		DTC
CYP2D6	CYP2D6	Definite	CYP2D6	ELIGLUSTAT		PharmGKB|FDA	20864621
CYP2D6	CYP2D6	Definite	CYP2D6	PROPAFENONE		PharmGKB|FDA	2713973|14653957|17001296|12421483|17460029
CYP2D6	CYP2D6	Definite	CYP2D6	ETHINYL ESTRADIOL		DTC	22931300
CYP2D6	CYP2D6	Definite	CYP2D6	SB-431542		DTC
CYP2D6	CYP2D6	Definite	CYP2D6	CHEMBL1394328		DTC
CYP2D6	CYP2D6	Definite	CYP2D6	KETOTIFEN		DTC
CYP2D6	CYP2D6	Definite	CYP2D6	CODEINE		FDA
CYP2D6	CYP2D6	Definite	CYP2D6	BROMAZEPAM		PharmGKB
CYP2D6	CYP2D6	Definite	CYP2D6	LOVASTATIN		DTC|PharmGKB	22281720|22931300
CYP2D6	CYP2D6	Definite	CYP2D6	DIHYDROSPINGOSINE		DTC
CYP2D6	CYP2D6	Definite	CYP2D6	CHEMBL609628		DTC
CYP2D6	CYP2D6	Definite	CYP2D6	DOCEBENONE		DTC
CYP2D6	CYP2D6	Definite	CYP2D6	GRANISETRON		PharmGKB	16551910
CYP2D6	CYP2D6	Definite	CYP2D6	PIRIBEDIL		DTC
CYP2D6	CYP2D6	Definite	CYP2D6	DOMPERIDONE		DTC
CYP2D6	CYP2D6	Definite	CYP2D6	PROPOXYCAINE		DTC
CYP2D6	CYP2D6	Definite	CYP2D6	GLUTETHIMIDE		TTD
CYP2D6	CYP2D6	Definite	CYP2D6	FLUVOXAMINE		FDA
CYP2D6	CYP2D6	Definite	CYP2D6	PHENOXYBENZAMINE		DTC	22931300
CYP2D6	CYP2D6	Definite	CYP2D6	(R,S)-INDATRALINE		DTC
CYP2D6	CYP2D6	Definite	CYP2D6	SPIPERONE		DTC
CYP2D6	CYP2D6	Definite	CYP2D6	CROMOLYN		DTC	22931300
CYP2D6	CYP2D6	Definite	CYP2D6	CHEMBL512908		DTC
CYP2D6	CYP2D6	Definite	CYP2D6	CHEMBL88147		DTC
CYP2D6	CYP2D6	Definite	CYP2D6	CHEMBL83954		DTC
CYP2D6	CYP2D6	Definite	CYP2D6	HALOPERIDOL		DTC
CYP2D6	CYP2D6	Definite	CYP2D6	RALOXIFENE		DTC	22931300
CYP2D6	CYP2D6	Definite	CYP2D6	CARVEDILOL		FDA
CYP2D6	CYP2D6	Definite	CYP2D6	ARFORMOTEROL		PharmGKB|FDA
CYP2D6	CYP2D6	Definite	CYP2D6	ALLOPURINOL		DTC	22931300
CYP2D6	CYP2D6	Definite	CYP2D6	DEXEFAROXAN		DTC
CYP2D6	CYP2D6	Definite	CYP2D6	(-)-U-50488		DTC
CYP2D6	CYP2D6	Definite	CYP2D6	ADIPHENINE		DTC
CYP2D6	CYP2D6	Definite	CYP2D6	ENDO-ATROPINE		DTC	22931300
CYP2D6	CYP2D6	Definite	CYP2D6	THIORIDAZINE		PharmGKB|FDA	19604081|2007317
CYP2D6	CYP2D6	Definite	CYP2D6	CYCLOBENZAPRINE		DTC
CYP2D6	CYP2D6	Definite	CYP2D6	HYDROCOTARNINE		DTC
CYP2D6	CYP2D6	Definite	CYP2D6	GEFITINIB		FDA
CYP2D6	CYP2D6	Definite	CYP2D6	BENZETHONIUM		DTC
CYP2D6	CYP2D6	Definite	CYP2D6	CHEMBL1288013		DTC
CYP2D6	CYP2D6	Definite	CYP2D6	U-50488 METHANE SULFONATE		DTC
CYP2D6	CYP2D6	Definite	CYP2D6	BENZAMIL		DTC
CYP2D6	CYP2D6	Definite	CYP2D6	PHENYLBUTAZONE		DTC	22931300
CYP2D6	CYP2D6	Definite	CYP2D6	OXYMETAZOLINE		DTC
CYP2D6	CYP2D6	Definite	CYP2D6	PNU-99194A		DTC
CYP2D6	CYP2D6	Definite	CYP2D6	PALONOSETRON		PharmGKB|FDA
CYP2D6	CYP2D6	Definite	CYP2D6	CEVIMELINE		PharmGKB|FDA
CYP2D6	CYP2D6	Definite	CYP2D6	DOXEPIN		FDA
CYP2D6	CYP2D6	Definite	CYP2D6	BECLOMETHASONE		DTC	22931300
CYP2D6	CYP2D6	Definite	CYP2D6	TACROLIMUS		NCI	17202802
CYP2D6	CYP2D6	Definite	CYP2D6	NITROFURANTOIN		DTC	22931300
CYP2D6	CYP2D6	Definite	CYP2D6	REMOXIPRIDE		DTC	22931300
CYP2D6	CYP2D6	Definite	CYP2D6	CORYNANTHEINE		DTC
CYP2D6	CYP2D6	Definite	CYP2D6	EMODIN		DTC
CYP2D6	CYP2D6	Definite	CYP2D6	NIACIN		DTC	22931300
CYP2D6	CYP2D6	Definite	CYP2D6	BUDESONIDE		DTC	22931300
CYP2D6	CYP2D6	Definite	CYP2D6	OLVANIL		DTC
CYP2D6	CYP2D6	Definite	CYP2D6	SOTALOL		DTC	22931300
CYP2D6	CYP2D6	Definite	CYP2D6	DEXTROMETHORPHAN		DTC|FDA	21422192
CYP2D6	CYP2D6	Definite	CYP2D6	CHEMBL177809		DTC
CYP2D6	CYP2D6	Definite	CYP2D6	DIDANOSINE		DTC	22931300
CYP2D6	CYP2D6	Definite	CYP2D6	DAPOXETINE		PharmGKB	26937172
CYP2D6	CYP2D6	Definite	CYP2D6	CHEMBL1339015		DTC
CYP2D6	CYP2D6	Definite	CYP2D6	PROPYLPYRAZOLETRIOL		DTC
CYP2D6	CYP2D6	Definite	CYP2D6	TELENZEPINE		DTC
CYP2D6	CYP2D6	Definite	CYP2D6	INDINAVIR		DTC	22931300
CYP2D6	CYP2D6	Definite	CYP2D6	PHENOBARBITAL		DTC	22931300
CYP2D6	CYP2D6	Definite	CYP2D6	CHEMBL1329326		DTC
CYP2D6	CYP2D6	Definite	CYP2D6	GARLIC		NCI	15974642
CYP2D6	CYP2D6	Definite	CYP2D6	DULOXETINE		FDA
CYP2D6	CYP2D6	Definite	CYP2D6	MEFENAMIC ACID		DTC	22931300
CYP2D6	CYP2D6	Definite	CYP2D6	BREXPIPRAZOLE		PharmGKB|FDA
CYP2D6	CYP2D6	Definite	CYP2D6	CHEMBL591613		DTC
CYP2D6	CYP2D6	Definite	CYP2D6	DEXTROMETHORPHAN HYDROBROMIDE		DTC
CYP2D6	CYP2D6	Definite	CYP2D6	DIPHENHYDRAMINE		DTC	22931300
CYP2D6	CYP2D6	Definite	CYP2D6	CIMETIDINE		DTC	22931300
CYP2D6	CYP2D6	Definite	CYP2D6	AMSACRINE		DTC	22931300
CYP2D6	CYP2D6	Definite	CYP2D6	INDOMETHACIN		DTC	22931300
CYP2D6	CYP2D6	Definite	CYP2D6	CHLOROPYRAMINE		DTC
CYP2D6	CYP2D6	Definite	CYP2D6	DONEPEZIL		PharmGKB|FDA	24433464|26952092
CYP2D6	CYP2D6	Definite	CYP2D6	NORDIHYDROGUAIARETIC ACID		DTC
CYP2D6	CYP2D6	Definite	CYP2D6	CLOFAZIMINE		DTC
CYP2D6	CYP2D6	Definite	CYP2D6	MAPROTILINE HYDROCHLORIDE		DTC
CYP2D6	CYP2D6	Definite	CYP2D6	ISOQUINE		TTD
CYP2D6	CYP2D6	Definite	CYP2D6	LOFEXIDINE		PharmGKB|FDA
CYP2D6	CYP2D6	Definite	CYP2D6	SULINDAC		DTC	22931300
CYP2D6	CYP2D6	Definite	CYP2D6	COLCHICINE		DTC|PharmGKB	22931300|25645282
CYP2D6	CYP2D6	Definite	CYP2D6	VERNAKALANT		PharmGKB
CYP2D6	CYP2D6	Definite	CYP2D6	TACRINE		DTC	22931300
CYP2D6	CYP2D6	Definite	CYP2D6	MORPHINE		PharmGKB	19523031|8351162|17986163
CYP2D6	CYP2D6	Definite	CYP2D6	PYRILAMINE		DTC
CYP2D6	CYP2D6	Definite	CYP2D6	MIRABEGRON		PharmGKB|FDA
CYP2D6	CYP2D6	Definite	CYP2D6	PHENYTOIN		DTC|PharmGKB	22931300|24915025
CYP2D6	CYP2D6	Definite	CYP2D6	ACETAMINOPHEN		DTC|PharmGKB	19219744|11095574|26049587|19308365|22931300|17564651
CYP2D6	CYP2D6	Definite	CYP2D6	DYCLONINE		DTC
CYP2D6	CYP2D6	Definite	CYP2D6	HYDROMORPHONE		PharmGKB	17986163
CYP2D6	CYP2D6	Definite	CYP2D6	NICLOSAMIDE		DTC
CYP2D6	CYP2D6	Definite	CYP2D6	ESOXYBUTYNIN		DTC
CYP2D6	CYP2D6	Definite	CYP2D6	GLAFENINE		DTC	22931300
CYP2D6	CYP2D6	Definite	CYP2D6	DEXAMETHASONE		DTC	22931300
CYP2D6	CYP2D6	Definite	CYP2D6	TIMOLOL		DTC|PharmGKB	7474246|16315032
CYP2D6	CYP2D6	Definite	CYP2D6	(S)-AMPA		DTC
CYP2D6	CYP2D6	Definite	CYP2D6	MECLIZINE		DTC|PharmGKB|FDA	22931300
CYP2D6	CYP2D6	Definite	CYP2D6	TIOTROPIUM		PharmGKB
CYP2D6	CYP2D6	Definite	CYP2D6	DROPERIDOL		DTC
CYP2D6	CYP2D6	Definite	CYP2D6	CLOFIBRIC ACID		DTC
CYP2D6	CYP2D6	Definite	CYP2D6	LORATADINE		DTC
CYP2D6	CYP2D6	Definite	CYP2D6	RACLOPRIDE		DTC
CYP2D6	CYP2D6	Definite	CYP2D6	MONTELUKAST		DTC	22931300
CYP2D6	CYP2D6	Definite	CYP2D6	CLOFIBRATE		DTC	22931300
CYP2D6	CYP2D6	Definite	CYP2D6	GUAIFENESIN		DTC	22931300
CYP2D6	CYP2D6	Definite	CYP2D6	PIPENZOLATE		DTC
CYP2D6	CYP2D6	Definite	CYP2D6	ISOBOLDINE		DTC
CYP2D6	CYP2D6	Definite	CYP2D6	(R,S)-IFENPRODIL		DTC
CYP2D6	CYP2D6	Definite	CYP2D6	PROMAZINE		DTC
CYP2D6	CYP2D6	Definite	CYP2D6	(R)-PINOCEMBRIN		DTC
CYP2D6	CYP2D6	Definite	CYP2D6	ZOLANTIDINE		DTC
CYP2D6	CYP2D6	Definite	CYP2D6	CLEMASTINE		DTC	22931300
CYP2D6	CYP2D6	Definite	CYP2D6	DESIPRAMINE		DTC|PharmGKB|FDA	9918137|8422746|20531370|10895986|1346258|15252821|14652703|14716707|6488689|18359183|14520122|8867869|9049581|8181196|8941025|17721180|3533565|3356084|17667959|15115913|12360109|14646691|15205367|27440861|11682257|16024198|3769385|16361630|17008819|23486447|10460069|9585799|16871470|11417443
CYP2D6	CYP2D6	Definite	CYP2D6	BUTYLATED HYDROXYTOLUENE		DTC	22931300
CYP2D6	CYP2D6	Definite	CYP2D6	APTIGANEL		DTC
CYP2D6	CYP2D6	Definite	CYP2D6	PI-CLONIDINE		DTC
CYP2D6	CYP2D6	Definite	CYP2D6	DAIDZEIN		DTC
CYP2D6	CYP2D6	Definite	CYP2D6	KETOPROFEN		PharmGKB	25989235
CYP2D6	CYP2D6	Definite	CYP2D6	SULPIRIDE		DTC	22931300
CYP2D6	CYP2D6	Definite	CYP2D6	UPADACITINIB		PharmGKB|FDA
CYP2D6	CYP2D6	Definite	CYP2D6	CHEMBL434063		DTC
CYP2D6	CYP2D6	Definite	CYP2D6	ECADOTRIL		DTC
CYP2D6	CYP2D6	Definite	CYP2D6	AMITRIPTYLINE		DTC|FDA	22931300
CYP2D6	CYP2D6	Definite	CYP2D6	TERBINAFINE		PharmGKB
CYP2D6	CYP2D6	Definite	CYP2D6	CLOMIPRAMINE		DTC|FDA
CYP2D6	CYP2D6	Definite	CYP2D6	HYDROXYZINE		DTC	22931300
CYP2D6	CYP2D6	Definite	CYP2D6	TAMOXIFEN CITRATE		DTC
CYP2D6	CYP2D6	Definite	CYP2D6	FASUDIL		DTC
CYP2D6	CYP2D6	Definite	CYP2D6	BERBERINE		DTC
CYP2D6	CYP2D6	Definite	CYP2D6	IBRUTINIB		PharmGKB
CYP2D6	CYP2D6	Definite	CYP2D6	CLARITHROMYCIN		DTC	22931300
CYP2D6	CYP2D6	Definite	CYP2D6	CARIPRAZINE		PharmGKB|FDA
CYP2D6	CYP2D6	Definite	CYP2D6	CHEMBL591126		DTC
CYP2D6	CYP2D6	Definite	CYP2D6	DIPHENYLPYRALINE		DTC
CYP2D6	CYP2D6	Definite	CYP2D6	CLONIDINE		DTC|PharmGKB
CYP2D6	CYP2D6	Definite	CYP2D6	PENICILLIN V BENZATHINE		DTC
CYP2D6	CYP2D6	Definite	CYP2D6	FLUOXETINE		DTC|FDA	22931300
CYP2D6	CYP2D6	Definite	CYP2D6	DALFAMPRIDINE		DTC
CYP2D6	CYP2D6	Definite	CYP2D6	ISOXSUPRINE		DTC
CYP2D6	CYP2D6	Definite	CYP2D6	METHYLDOPA		DTC	22931300
CYP2D6	CYP2D6	Definite	CYP2D6	DICYCLOMINE		DTC
CYP2D6	CYP2D6	Definite	CYP2D6	TORSEMIDE		DTC	22931300
CYP2D6	CYP2D6	Definite	CYP2D6	NEFAZODONE		PharmGKB|FDA
CYP2D6	CYP2D6	Definite	CYP2D6	CHEMBL66114		DTC
CYP2D6	CYP2D6	Definite	CYP2D6	CYC-116		DTC	20462263
CYP2D6	CYP2D6	Definite	CYP2D6	CHEMBL74121		DTC
CYP2D6	CYP2D6	Definite	CYP2D6	PLICAMYCIN		DTC	22931300
CYP2D6	CYP2D6	Definite	CYP2D6	PREDNISONE		DTC	22931300
CYP2D6	CYP2D6	Definite	CYP2D6	CHLOROPHENYLPIPERAZINE		DTC
CYP2D6	CYP2D6	Definite	CYP2D6	CHEMBL187216		DTC
CYP2D6	CYP2D6	Definite	CYP2D6	FENTANYL		PharmGKB	25825958
CYP2D6	CYP2D6	Definite	CYP2D6	PIMOZIDE		DTC|PharmGKB|FDA	9951426|23059146
CYP2D6	CYP2D6	Definite	CYP2D6	GLYCINE		DTC	22931300
CYP2D6	CYP2D6	Definite	CYP2D6	HARMALINE		DTC
CYP2D6	CYP2D6	Definite	CYP2D6	TETRABENAZINE		PharmGKB|FDA	23280482
CYP2D6	CYP2D6	Definite	CYP2D6	ZUCLOPENTHIXOL		PharmGKB	12107620|1927573
CYP2D6	CYP2D6	Definite	CYP2D6	PROCHLORPERAZINE		DTC	22931300
CYP2D6	CYP2D6	Definite	CYP2D6	CHEMBL587259		DTC
CYP2D6	CYP2D6	Definite	CYP2D6	DEXPROPRANOLOL		DTC
CYP2D6	CYP2D6	Definite	CYP2D6	DIHYDROXIDINE		DTC
CYP2D6	CYP2D6	Definite	CYP2D6	STAVUDINE		DTC	22931300
CYP2D6	CYP2D6	Definite	CYP2D6	GRAVEOLINE		DTC
CYP2D6	CYP2D6	Definite	CYP2D6	PALIPERIDONE		PharmGKB|FDA	15767244
CYP2D6	CYP2D6	Definite	CYP2D6	SULFASALAZINE		DTC	22931300
CYP2D6	CYP2D6	Definite	CYP2D6	SPIRAMIDE		DTC
CYP2D6	CYP2D6	Definite	CYP2D6	AMPHETAMINE		NCI|PharmGKB|FDA	9264312
CYP2D6	CYP2D6	Definite	CYP2D6	LINEZOLID		DTC	24044938
CYP2D6	CYP2D6	Definite	CYP2D6	AMOXICILLIN		DTC	22931300
CYP2D6	CYP2D6	Definite	CYP2D6	ZAFIRLUKAST		DTC	22931300
CYP2D6	CYP2D6	Definite	CYP2D6	CHEMBL1161520		DTC
CYP2D6	CYP2D6	Definite	CYP2D6	SERTINDOLE		PharmGKB
CYP2D6	CYP2D6	Definite	CYP2D6	CHEMBL327980		DTC
CYP2D6	CYP2D6	Definite	CYP2D6	NORTRIPTYLINE		DTC|FDA
CYP2D6	CYP2D6	Definite	CYP2D6	ZILEUTON		DTC	22931300
CYP2D6	CYP2D6	Definite	CYP2D6	ARIPIPRAZOLE		FDA
CYP2D6	CYP2D6	Definite	CYP2D6	CHEMBL580421		DTC
CYP2D6	CYP2D6	Definite	CYP2D6	DIETHYLSTILBESTROL		DTC	22931300
CYP2D6	CYP2D6	Definite	CYP2D6	ASTEMIZOLE		DTC
CYP2D6	CYP2D6	Definite	CYP2D6	MEXILETINE		NCI|PharmGKB	9806111
CYP2D6	CYP2D6	Definite	CYP2D6	CEFTRIAXONE		DTC	22931300
CYP2D6	CYP2D6	Definite	CYP2D6	BENOXINATE		DTC
CYP2D6	CYP2D6	Definite	CYP2D6	RITANSERIN		DTC
CYP2D6	CYP2D6	Definite	CYP2D6	CHEMBL275311		DTC
CYP2D6	CYP2D6	Definite	CYP2D6	CHEMBL88272		DTC
CYP2D6	CYP2D6	Definite	CYP2D6	IODOMELATONIN		DTC
CYP2D6	CYP2D6	Definite	CYP2D6	CHEMBL287327		DTC
CYP2D6	CYP2D6	Definite	CYP2D6	NAPHAZOLINE		DTC
CYP2D6	CYP2D6	Definite	CYP2D6	PERPHENAZINE		DTC|PharmGKB|FDA	2743709
CYP2D6	CYP2D6	Definite	CYP2D6	RUCAPARIB		PharmGKB|FDA
CYP2D6	CYP2D6	Definite	CYP2D6	HYCANTHONE		DTC	22931300
CYP2D6	CYP2D6	Definite	CYP2D6	GUANFACINE		DTC
CYP2D6	CYP2D6	Definite	CYP2D6	CHLOROQUINE		DTC	22931300
CYP2D6	CYP2D6	Definite	CYP2D6	OXYMORPHONE		PharmGKB
CYP2D6	CYP2D6	Definite	CYP2D6	FORMOTEROL		PharmGKB|FDA
CYP2D6	CYP2D6	Definite	CYP2D6	TROLEANDOMYCIN		DTC	22931300
CYP2D6	CYP2D6	Definite	CYP2D6	PHENELZINE		DTC
CYP2D6	CYP2D6	Definite	CYP2D6	UMECLIDINIUM		PharmGKB|FDA
CYP2D6	CYP2D6	Definite	CYP2D6	NEBIVOLOL		PharmGKB|FDA
CYP2D6	CYP2D6	Definite	CYP2D6	RAUWOLFIA SERPENTINA		DTC
CYP2D6	CYP2D6	Definite	CYP2D6	VANOXERINE		DTC
CYP2D6	CYP2D6	Definite	CYP2D6	BOLDINE		DTC
CYP2D6	CYP2D6	Definite	CYP2D6	PROTRIPTYLINE		DTC|PharmGKB|FDA
CYP2D6	CYP2D6	Definite	CYP2D6	ALBUMIN HUMAN		NCI	11246175
CYP2D6	CYP2D6	Definite	CYP2D6	MAPROTILINE		DTC	22931300
CYP2D6	CYP2D6	Definite	CYP2D6	ELETRIPTAN		PharmGKB
CYP2D6	CYP2D6	Definite	CYP2D6	CLOBENPROPIT		DTC
CYP2D6	CYP2D6	Definite	CYP2D6	CHEMBL53898		DTC
CYP2D6	CYP2D6	Definite	CYP2D6	TOLTERODINE		PharmGKB|FDA	21352267|20530222|10190648|9630826|10583026|28087463
CYP2D6	CYP2D6	Definite	CYP2D6	RILMENIDINE		DTC
CYP2D6	CYP2D6	Definite	CYP2D6	LANSOPRAZOLE		DTC
CYP2D6	CYP2D6	Definite	CYP2D6	CHEMBL547101		DTC
CYP2D6	CYP2D6	Definite	CYP2D6	CHEMBL1256851		DTC
CYP2D6	CYP2D6	Definite	CYP2D6	METYROSINE		DTC	22931300
CYP2D6	CYP2D6	Definite	CYP2D6	VANIPREVIR		DTC	19841155
CYP2D6	CYP2D6	Definite	CYP2D6	CHEMBL1410004		DTC
CYP2D6	CYP2D6	Definite	CYP2D6	CHLORPROMAZINE		DTC|PharmGKB	8739822
CYP2D6	CYP2D6	Definite	CYP2D6	MIRTAZAPINE		DTC
CYP2D6	CYP2D6	Definite	CYP2D6	PSEUDOEPHEDRINE		DTC
CYP2D6	CYP2D6	Definite	CYP2D6	METOPROLOL		FDA
CYP2D6	CYP2D6	Definite	CYP2D6	CHEMBL85194		DTC
CYP2D6	CYP2D6	Definite	CYP2D6	PERHEXILINE		DTC|PharmGKB	22931300
CYP2D6	CYP2D6	Definite	CYP2D6	VORICONAZOLE		NCI	16141569
CYP2D6	CYP2D6	Definite	CYP2D6	AZATHIOPRINE		DTC	22931300
CYP2D6	CYP2D6	Definite	CYP2D6	PROPYLTHIOURACIL		DTC	22931300
CYP2D6	CYP2D6	Definite	CYP2D6	PYRAZINAMIDE		DTC	22931300
CYP2D6	CYP2D6	Definite	CYP2D6	IBUPROFEN		DTC	22931300
CYP2D6	CYP2D6	Definite	CYP2D6	U-0126		DTC
CYP2D6	CYP2D6	Definite	CYP2D6	CIPROFLOXACIN		DTC|PharmGKB	27469576|22931300
CYP2D6	CYP2D6	Definite	CYP2D6	CYPROTERONE		DTC	22931300
CYP2D6	CYP2D6	Definite	CYP2D6	ETOPOSIDE		DTC	22931300
CYP2D6	CYP2D6	Definite	CYP2D6	CILOSTAZOL		DTC	22931300
CYP2D6	CYP2D6	Definite	CYP2D6	BP-897		DTC
CYP2D6	CYP2D6	Definite	CYP2D6	DARIFENACIN		PharmGKB|FDA
CYP2D6	CYP2D6	Definite	CYP2D6	CHEMBL1096339		DTC
CYP2D6	CYP2D6	Definite	CYP2D6	DANTROLENE		DTC	22931300
CYP2D6	CYP2D6	Definite	CYP2D6	CHEMBL601135		DTC
CYP2D6	CYP2D6	Definite	CYP2D6	PROPRANOLOL		DTC|FDA	22931300
CYP2D6	CYP2D6	Definite	CYP2D6	CHEMBL530733		DTC
CYP2D6	CYP2D6	Definite	CYP2D6	CYPROHEPTADINE		DTC
CYP2D6	CYP2D6	Definite	CYP2D6	LEUCINE		DTC	22931300
CYP2D6	CYP2D6	Definite	CYP2D6	CHEMBL333121		DTC
CYP2D6	CYP2D6	Definite	CYP2D6	GALANTAMINE		PharmGKB|FDA	23503455
CYP2D6	CYP2D6	Definite	CYP2D6	DEXTROMEPROMAZINE		DTC
CYP2D6	CYP2D6	Definite	CYP2D6	PAPAVERINE		DTC
CYP2D6	CYP2D6	Definite	CYP2D6	E-DOXEPIN		DTC
CYP2D6	CYP2D6	Definite	CYP2D6	CHEMBL287045		DTC
CYP2D6	CYP2D6	Definite	CYP2D6	APOMORPHINE		DTC
CYP2D6	CYP2D6	Definite	CYP2D6	DIMETHISOQUIN		DTC
CYP2D6	CYP2D6	Definite	CYP2D6	CHEMBL335741		DTC
CYP2D6	CYP2D6	Definite	CYP2D6	METOCLOPRAMIDE		FDA
CYP2D6	CYP2D6	Definite	CYP2D6	KETANSERIN TARTRATE		DTC
CYP2D6	CYP2D6	Definite	CYP2D6	CHEMBL445102		DTC
CYP2D6	CYP2D6	Definite	CYP2D6	L-694247		DTC
CYP2D6	CYP2D6	Definite	CYP2D6	LEVOMEPROMAZINE		PharmGKB	19308365|29472872
CYP2D6	CYP2D6	Definite	CYP2D6	TRIMETHOPRIM		DTC	22931300
CYP2D6	CYP2D6	Definite	CYP2D6	VORTIOXETINE		PharmGKB|FDA
CYP2D6	CYP2D6	Definite	CYP2D6	BIOCHANIN		DTC
CYP2D6	CYP2D6	Definite	CYP2D6	SP-600125		DTC
CYP2D6	CYP2D6	Definite	CYP2D6	ETHYLISOTHIOUREA		DTC
CYP2D6	CYP2D6	Definite	CYP2D6	NATEGLINIDE		DTC	22931300
CYP2D6	CYP2D6	Definite	CYP2D6	AZTREONAM		DTC	22931300
CYP2D6	CYP2D6	Definite	CYP2D6	AMOXAPINE		DTC|PharmGKB|FDA
CYP2D6	CYP2D6	Definite	CYP2D6	THIOPERAMIDE		DTC
CYP2D6	CYP2D6	Definite	CYP2D6	DRONEDARONE		PharmGKB
CYP2D6	CYP2D6	Definite	CYP2D6	CHEMBL79140		DTC
CYP2D6	CYP2D6	Definite	CYP2D6	OXYBUTYNIN		DTC	22931300
CYP2D6	CYP2D6	Definite	CYP2D6	LOPERAMIDE		DTC
CYP2D6	CYP2D6	Definite	CYP2D6	DICLOFENAC		DTC	22931300
CYP2D6	CYP2D6	Definite	CYP2D6	KARANJIN		DTC
CYP2D6	CYP2D6	Definite	CYP2D6	PF-03715455		DTC	21888439
CYP2D6	CYP2D6	Definite	CYP2D6	AMIODARONE		DTC|PharmGKB
CYP2D6	CYP2D6	Definite	CYP2D6	CHEMBL83899		DTC
CYP2D6	CYP2D6	Definite	CYP2D6	PHENTOLAMINE MESYLATE		DTC
CYP2D6	CYP2D6	Definite	CYP2D6	ALPROSTADIL		DTC	22931300
CYP2D6	CYP2D6	Definite	CYP2D6	CLOMETHIAZOLE		DTC
CYP2D6	CYP2D6	Definite	CYP2D6	TRIFLUPROMAZINE		DTC
CYP2D6	CYP2D6	Definite	CYP2D6	REL-CISAPRIDE		DTC	22931300
CYP2D6	CYP2D6	Definite	CYP2D6	HARMOL		DTC
CYP2D6	CYP2D6	Definite	CYP2D6	NEVIRAPINE		DTC|PharmGKB	22931300
CYP2D6	CYP2D6	Definite	CYP2D6	MINOCYCLINE		DTC	22931300
CYP2D6	CYP2D6	Definite	CYP2D6	CAFFEINE		DTC	22931300
CYP2D6	CYP2D6	Definite	CYP2D6	CHEMBL71294		DTC
CYP2D6	CYP2D6	Definite	CYP2D6	LEVOBUPIVACAINE		DTC
CYP2D6	CYP2D6	Definite	CYP2D6	IMIPRAMINE		DTC|FDA	22931300
CYP2D6	CYP2D6	Definite	CYP2D6	CORTICOTROPIN		NCI	12571407
CYP2D6	CYP2D6	Definite	CYP2D6	RITONAVIR		PharmGKB	24433361
CYP2D6	CYP2D6	Definite	CYP2D6	LAPACHONE		DTC
CYP2D6	CYP2D6	Definite	CYP2D6	ICI-199,441		DTC
CYP2D6	CYP2D6	Definite	CYP2D6	PROPANTHELINE		DTC
CYP2D6	CYP2D6	Definite	CYP2D6	CHEMBL258465		DTC
CYP2D6	CYP2D6	Definite	CYP2D6	METARAMINOL		DTC	22931300
CYP2D6	CYP2D6	Definite	CYP2D6	FLIBANSERIN		PharmGKB|FDA
CYP2D6	CYP2D6	Definite	CYP2D6	HYDROCODONE		PharmGKB	9352573|12920424|25621429|24269714|20837591|7693389|16631290
CYP2D6	CYP2D6	Definite	CYP2D6	CHEMBL1256678		DTC
CYP2D6	CYP2D6	Definite	CYP2D6	HYDRALAZINE		DTC	22931300
CYP2D6	CYP2D6	Definite	CYP2D6	ISOPROPAMIDE		DTC
CYP2D6	CYP2D6	Definite	CYP2D6	ATORVASTATIN		PharmGKB	17700359
CYP2D6	CYP2D6	Definite	CYP2D6	3',4' DICHLOROBENZAMIL		DTC
CYP2D6	CYP2D6	Definite	CYP2D6	FIPEXIDE		DTC
CYP2D6	CYP2D6	Definite	CYP2D6	FLUCONAZOLE		DTC	22931300
CYP2D6	CYP2D6	Definite	CYP2D6	INDIRUBIN-3-MONOXIME		DTC
CYP2D6	CYP2D6	Definite	CYP2D6	CHEMBL1358137		DTC
CYP2D6	CYP2D6	Definite	CYP2D6	CHLORPROPAMIDE		DTC	22931300
CYP2D6	CYP2D6	Definite	CYP2D6	CITALOPRAM		FDA
CYP2D6	CYP2D6	Definite	CYP2D6	HYDROXYCHLOROQUINE		NCI	10848718
CYP2D6	CYP2D6	Definite	CYP2D6	IPRATROPIUM		DTC	22931300
CYP2D6	CYP2D6	Definite	CYP2D6	CHEMBL1169388		DTC
CYP2D6	CYP2D6	Definite	CYP2D6	DESVENLAFAXINE		PharmGKB|FDA	29327975
CYP2D6	CYP2D6	Definite	CYP2D6	MICONAZOLE		DTC
CYP2D6	CYP2D6	Definite	CYP2D6	DEUTETRABENAZINE		PharmGKB|FDA
CYP2D6	CYP2D6	Definite	CYP2D6	CHEMBL1513392		DTC
CYP2D6	CYP2D6	Definite	CYP2D6	HYDRASTININE		DTC
CYP2D6	CYP2D6	Definite	CYP2D6	(S)-ROSCOVITINE		DTC
CYP2D6	CYP2D6	Definite	CYP2D6	BAICALEIN		DTC
CYP2D6	CYP2D6	Definite	CYP2D6	CHEMBL1337960		DTC
CYP2D6	CYP2D6	Definite	CYP2D6	OLOMOUCINE		DTC
CYP2D6	CYP2D6	Definite	CYP2D6	TERAZOSIN		DTC	22931300
CYP2D6	CYP2D6	Definite	CYP2D6	KETOCONAZOLE		DTC	22931300
CYP2D6	CYP2D6	Definite	CYP2D6	GENTAMICIN		DTC	22931300
CYP2D6	CYP2D6	Definite	CYP2D6	TETRACYCLINE		DTC	22931300
CYP2D6	CYP2D6	Definite	CYP2D6	MEPRYLCAINE		DTC
CYP2D6	CYP2D6	Definite	CYP2D6	TAMOXIFEN		FDA
CYP2D6	CYP2D6	Definite	CYP2D6	SULFADOXINE		DTC	22931300
CYP2D6	CYP2D6	Definite	CYP2D6	KAEMPFEROL		DTC
CYP2D6	CYP2D6	Definite	CYP2D6	METHYLPHENIDATE		NCI	10831022
CYP2D6	CYP2D6	Definite	CYP2D6	CHEMBL285932		DTC
CYP2D6	CYP2D6	Definite	CYP2D6	LY-294002		DTC
CYP2D6	CYP2D6	Definite	CYP2D6	CHEMBL601110		DTC
CYP2D6	CYP2D6	Definite	CYP2D6	FLUSPIRILENE		DTC
CYP2D6	CYP2D6	Definite	CYP2D6	DISOPYRAMIDE		PharmGKB
CYP2D6	CYP2D6	Definite	CYP2D6	CARBETAPENTANE		DTC
CYP2D6	CYP2D6	Definite	CYP2D6	CHEMBL336095		DTC
CYP2D6	CYP2D6	Definite	CYP2D6	STREPTOZOCIN		NCI	6305526
CYP2D6	CYP2D6	Definite	CYP2D6	MIDODRINE		DTC	22931300
CYP2D6	CYP2D6	Definite	CYP2D6	MERCAPTOPURINE		DTC	22931300
CYP2D6	CYP2D6	Definite	CYP2D6	ILOPERIDONE		PharmGKB|FDA	23277250
CYP2D6	CYP2D6	Definite	CYP2D6	ACACETIN		DTC
CYP2D6	CYP2D6	Definite	CYP2D6	PHENTOLAMINE		DTC
CYP2D6	CYP2D6	Definite	CYP2D6	(R)-PROCYCLIDINE		DTC
CYP2D6	CYP2D6	Definite	CYP2D6	CYTARABINE		DTC	22931300
CYP2D6	CYP2D6	Definite	CYP2D6	YOHIMBINE		PharmGKB	15289791
CYP2D6	CYP2D6	Definite	CYP2D6	METHAPYRILENE		DTC
CYP2D6	CYP2D6	Definite	CYP2D6	CHLORPHENIRAMINE		PharmGKB
CYP2D6	CYP2D6	Definite	CYP2D6	ACEPROMAZINE		DTC
CYP2D6	CYP2D6	Definite	CYP2D6	MITOMYCIN		DTC	22931300
CYP2D6	CYP2D6	Definite	CYP2D6	DOFETILIDE		DTC	22931300
CYP2D6	CYP2D6	Definite	CYP2D6	NISOLDIPINE		DTC	22931300
CYP2D6	CYP2D6	Definite	CYP2D6	FESOTERODINE		PharmGKB|FDA
CYP2D6	CYP2D6	Definite	CYP2D6	CHEMBL51697		DTC
CYP2D6	CYP2D6	Definite	CYP2D6	PAPAVEROLINE		DTC
CYP2D6	CYP2D6	Definite	CYP2D6	ATOMOXETINE		DTC|FDA
CYP2D6	CYP2D6	Definite	CYP2D6	SR-2640		DTC
CYP2D6	CYP2D6	Definite	CYP2D6	DEQUALINIUM		DTC
CYP2D6	CYP2D6	Definite	CYP2D6	SNC-80		DTC
CYP2D6	CYP2D6	Definite	CYP2D6	PRIDINOL		DTC
CYP2D6	CYP2D6	Definite	CYP2D6	PIPERACETAZINE		DTC
CYP2D6	CYP2D6	Definite	CYP2D6	E-FLUPENTIXOL		PharmGKB
CYP2D6	CYP2D6	Definite	CYP2D6	MANGOSTIN		DTC
CYP2D6	CYP2D6	Definite	CYP2D6	GR-55562		DTC
CYP2D6	CYP2D6	Definite	CYP2D6	TIOTIDINE		DTC
CYP2D6	CYP2D6	Definite	CYP2D6	U-50488 METHANE SULFONATE		DTC
CYP2D6	CYP2D6	Definite	CYP2D6	HALOFANTRINE HYDROCHLORIDE		DTC
CYP2D6	CYP2D6	Definite	CYP2D6	ZIDOVUDINE		DTC	22931300
CYP2D6	CYP2D6	Definite	CYP2D6	OXETHAZAINE		DTC
CYP2D6	CYP2D6	Definite	CYP2D6	N-DESMETHYLCLOZAPINE		DTC
CYP2D6	CYP2D6	Definite	CYP2D6	CHEMBL1269022		DTC
CYP2D6	CYP2D6	Definite	CYP2D6	GABAZINE		DTC
CYP2D6	CYP2D6	Definite	CYP2D6	CHEMBL527271		DTC
CYP2D6	CYP2D6	Definite	CYP2D6	LABETALOL		DTC	22931300
CYP2D6	CYP2D6	Definite	CYP2D6	TRIFLUOPERAZINE		DTC
CYP2D6	CYP2D6	Definite	CYP2D6	PIRINIXIC ACID		DTC
CYP2D6	CYP2D6	Definite	CYP2D6	CHEMBL303336		DTC
CYP2D6	CYP2D6	Definite	CYP2D6	5-(N-METHYL-N-ISOBUTYL)AMILORIDE		DTC
CYP2D6	CYP2D6	Definite	CYP2D6	CHEMBL476501		DTC
CYP2D6	CYP2D6	Definite	CYP2D6	CHEMBL362863		DTC
CYP2D6	CYP2D6	Definite	CYP2D6	FLOXURIDINE		DTC	22931300
CYP2D6	CYP2D6	Definite	CYP2D6	4-CHLOROMERCURIBENZOIC ACID		DTC
CYP2D6	CYP2D6	Definite	CYP2D6	OXOTREMORINE		DTC
CYP2D6	CYP2D6	Definite	CYP2D6	CHEMBL8565		DTC
CYP2D6	CYP2D6	Definite	CYP2D6	CHEMBL598270		DTC
CYP2D6	CYP2D6	Definite	CYP2D6	DIPHENYLENEIODONIUM		DTC
CYP2D6	CYP2D6	Definite	CYP2D6	FINASTERIDE		DTC	22931300
CYP2D6	CYP2D6	Definite	CYP2D6	NICOTINE		PharmGKB	26287939|24611668
CYP2D6	CYP2D6	Definite	CYP2D6	LEVOPROPOXYPHENE NAPSYLATE		DTC
CYP2D6	CYP2D6	Definite	CYP2D6	PIPERIDOLATE		DTC
CYP2D6	CYP2D6	Definite	CYP2D6	BEPRIDIL		PharmGKB	16508157
CYP2D6	CYP2D6	Definite	CYP2D6	METHOTREXATE		DTC	22931300
CYP2D6	CYP2D6	Definite	CYP2D6	CHEMBL189724		DTC
CYP2D6	CYP2D6	Definite	CYP2D6	TICLOPIDINE		DTC	22931300
CYP2D6	CYP2D6	Definite	CYP2D6	CHEMBL552439		DTC
CYP2D6	CYP2D6	Definite	CYP2D6	RISPERIDONE		DTC|FDA
CYP2D6	CYP2D6	Definite	CYP2D6	CLORGILINE		DTC
CYP2D6	CYP2D6	Definite	CYP2D6	LEUPROLIDE		DTC	22931300
CYP2D6	CYP2D6	Definite	CYP2D6	ENOXOLONE		DTC	22931300
CYP2D6	CYP2D6	Definite	CYP2D6	IMETIT		DTC
CYP2D6	CYP2D6	Definite	CYP2D6	PRIDINOL METHANESULFONATE		DTC
CYP2D6	CYP2D6	Definite	CYP2D6	MESTRANOL		DTC	22931300
CYP2D6	CYP2D6	Definite	CYP2D6	FLAVOXATE		DTC
CYP2D6	CYP2D6	Definite	CYP2D6	CHEMBL26320		DTC
CYP2D6	CYP2D6	Definite	CYP2D6	OFLOXACIN		DTC	22931300
CYP2D6	CYP2D6	Definite	CYP2D6	CHEMBL1214274		DTC
CYP2D6	CYP2D6	Definite	CYP2D6	BUTACAINE		DTC
CYP2D6	CYP2D6	Definite	CYP2D6	ASPIRIN		DTC|PharmGKB	22931300
CYP2D6	CYP2D6	Definite	CYP2D6	VENLAFAXINE		FDA
CYP2D6	CYP2D6	Definite	CYP2D6	CHEMBL1593717		DTC
CYP2D6	CYP2D6	Definite	CYP2D6	TRACAZOLATE		DTC
CYP2D6	CYP2D6	Definite	CYP2D6	BROMPERIDOL		DTC
CYP2D6	CYP2D6	Definite	CYP2D6	CHEMBL68131		DTC
CYP2D6	CYP2D6	Definite	CYP2D6	DIMETACRINE		DTC
CYP2D6	CYP2D6	Definite	CYP2D6	DIMENHYDRINATE		DTC
CYP2D6	CYP2D6	Definite	CYP2D6	CHEMBL112816		DTC
CYP2D6	CYP2D6	Definite	CYP2D6	CHLORHEXIDINE		DTC
CYP2D6	CYP2D6	Definite	CYP2D6	CHEMBL35482		DTC
CYP2D6	CYP2D6	Definite	CYP2D6	CLEMIZOLE		DTC
CYP2D6	CYP2D6	Definite	CYP2D6	IBUDILAST		DTC
CYP2D6	CYP2D6	Definite	CYP2D6	CHEMBL250428		DTC
CYP2D6	CYP2D6	Definite	CYP2D6	FLUVASTATIN		PharmGKB
CYP2D6	CYP2D6	Definite	CYP2D6	DAPSONE		DTC	22931300
CYP2D6	CYP2D6	Definite	CYP2D6	PROGESTERONE		DTC	22931300
CYP2D6	CYP2D6	Definite	CYP2D6	TRIFLUPERIDOL		DTC
CYP2D6	CYP2D6	Definite	CYP2D6	CP-339818		DTC
CYP2D6	CYP2D6	Definite	CYP2D6	(S)-ALAPROCLATE		DTC
CYP2D6	CYP2D6	Definite	CYP2D6	IOBENGUANE		DTC
CYP2D6	CYP2D6	Definite	CYP2D6	HYPERICIN		NCI	15100173
CYP2D6	CYP2D6	Definite	CYP2D6	ROPINIROLE		DTC
CYP2D6	CYP2D6	Definite	CYP2D6	CIRAZOLINE		DTC
CYP2D6	CYP2D6	Definite	CYP2D6	LANSOPRAZOLE SULFIDE		DTC
CYP2D6	CYP2D6	Definite	CYP2D6	VESAMICOL		DTC
CYP2D6	CYP2D6	Definite	CYP2D6	NAPROXEN		DTC	22931300
CYP2D6	CYP2D6	Definite	CYP2D6	IMAZODAN		DTC
CYP2D6	CYP2D6	Definite	CYP2D6	DILTIAZEM		DTC	22931300
CYP2D6	CYP2D6	Definite	CYP2D6	CHEMBL1256746		DTC
CYP2D6	CYP2D6	Definite	CYP2D6	BUSULFAN		DTC	22931300
CYP2D6	CYP2D6	Definite	CYP2D6	SULFAPHENAZOLE		DTC	22931300
CYP2D6	CYP2D6	Definite	CYP2D6	VALBENAZINE		PharmGKB|FDA
CYP2D6	CYP2D6	Definite	CYP2D6	METHAPHIT		DTC
CYP2D6	CYP2D6	Definite	CYP2D6	CHEMBL455185		DTC
CYP2D6	CYP2D6	Definite	CYP2D6	ARBACLOFEN		DTC
CYP2D6	CYP2D6	Definite	CYP2D6	DIPHENIDOL		DTC
CYP2D6	CYP2D6	Definite	CYP2D6	CHEMBL101510		DTC
CYP2D6	CYP2D6	Definite	CYP2D6	ETICLOPRIDE		DTC
CYP2D6	CYP2D6	Definite	CYP2D6	ANTAZOLINE		DTC
CYP2D6	CYP2D6	Definite	CYP2D6	CARMUSTINE		DTC	22931300
CYP2D6	CYP2D6	Definite	CYP2D6	QUINIDINE		PharmGKB|FDA
CYP2D6	CYP2D6	Definite	CYP2D6	QUININE		PharmGKB
CYP2D6	CYP2D6	Definite	CYP2D6	(-)-PROPANOLOL		DTC
CYP2D6	CYP2D6	Definite	CYP2D6	ERLOTINIB		NCI	17575239
CYP2D6	CYP2D6	Definite	CYP2D6	PIRENZEPINE		DTC
CYP2D6	CYP2D6	Definite	CYP2D6	(S)-PROMETHAZINE		DTC
CYP2D6	CYP2D6	Definite	CYP2D6	GLYBURIDE		DTC
CYP2D6	CYP2D6	Definite	CYP2D6	7-HYDROXYCHLORPROMAZINE		DTC
CYP2D6	CYP2D6	Definite	CYP2D6	RANOLAZINE		PharmGKB
CYP2D6	CYP2D6	Definite	CYP2D6	CHEMBL22778		DTC
CYP2D6	CYP2D6	Definite	CYP2D6	CHEMBL27006		DTC
CYP2D6	CYP2D6	Definite	CYP2D6	DIHYDREXIDINE		DTC
CYP2D6	CYP2D6	Definite	CYP2D6	EMBELIN		DTC
CYP2D6	CYP2D6	Definite	CYP2D6	SPARTEINE		PharmGKB	8563771|8287064|1844820|8946471|10471060|9241659|15618746|8530011|17001296|9089660|9511177|8655150|18784265|7845481|2211621|17460029
CYP2D6	CYP2D6	Definite	CYP2D6	NILUTAMIDE		DTC	22931300
CYP2D6	CYP2D6	Definite	CYP2D6	MENTHOFURAN		DTC	22931300
CYP2D6	CYP2D6	Definite	CYP2D6	GALANGIN		DTC
CYP2D6	CYP2D6	Definite	CYP2D6	ETHYLMORPHINE		PharmGKB
CYP2D6	CYP2D6	Definite	CYP2D6	CHEMBL309760		DTC
CYP2D6	CYP2D6	Definite	CYP2D6	ESOMEPRAZOLE		PharmGKB
CYP2D6	CYP2D6	Definite	CYP2D6	CHEMBL291536		DTC
CYP2D6	CYP2D6	Definite	CYP2D6	CYCLOPHOSPHAMIDE		DTC	22931300
CYP2D6	CYP2D6	Definite	CYP2D6	TESTOSTERONE		DTC	22931300
CYP2D6	CYP2D6	Definite	CYP2D6	OXATOMIDE		DTC
CYP2D6	CYP2D6	Definite	CYP2D6	PROMETHAZINE		PharmGKB	17986163
CYP2D6	CYP2D6	Definite	CYP2D6	SIMVASTATIN		DTC	22931300
CYP2D6	CYP2D6	Definite	CYP2D6	METHANTHELINE		DTC
CYP2D6	CYP2D6	Definite	CYP2D6	DIGOXIN		DTC	22931300
CYP2D6	CYP2D6	Definite	CYP2D6	FELBAMATE		DTC	22931300
CYP2D6	CYP2D6	Definite	CYP2D6	CARBAMAZEPINE		DTC	22931300
CYP2D6	CYP2D6	Definite	CYP2D6	OMEPRAZOLE		DTC	22931300
CYP2D6	CYP2D6	Definite	CYP2D6	KENPAULLONE		DTC
CYP2D6	CYP2D6	Definite	CYP2D6	CHEMBL389390		DTC
CYP2D6	CYP2D6	Definite	CYP2D6	CYCLOSPORINE		DTC	22931300
CYP2D6	CYP2D6	Definite	CYP2D6	COUMARIN		DTC	22931300
CYP2D6	CYP2D6	Definite	CYP2D6	ONDANSETRON		FDA
CYP2D6	CYP2D6	Definite	CYP2D6	CHEMBL244707		DTC
CYP2D6	CYP2D6	Definite	CYP2D6	PYRIDOSTIGMINE		DTC	22931300
CYP2D6	CYP2D6	Definite	CYP2D6	RIFAMPIN		DTC	22931300
CYP2D6	CYP2D6	Definite	CYP2D6	MIANSERIN		PharmGKB	14652703|1527229|8062494|9408809
CYP2D6	CYP2D6	Definite	CYP2D6	FLUPHENAZINE		DTC|PharmGKB
CYP2D6	CYP2D6	Definite	CYP2D6	MECAMYLAMINE		DTC	22931300
CYP2D6	CYP2D6	Definite	CYP2D6	NEOSTIGMINE BROMIDE		DTC	22931300
CYP2D6	CYP2D6	Definite	CYP2D6	EBSELEN		DTC
CYP2D6	CYP2D6	Definite	CYP2D6	DENATONIUM BENZOATE		DTC
CYP2D6	CYP2D6	Definite	CYP2D6	LIDOFLAZINE		DTC
CYP2D6	CYP2D6	Definite	CYP2D6	CHEMBL546597		DTC
CYP2D6	CYP2D6	Definite	CYP2D6	ETIDRONIC ACID		DTC	22931300
CYP2D6	CYP2D6	Definite	CYP2D6	FERROUS SULFATE		DTC	22931300
CYP2D6	CYP2D6	Definite	CYP2D6	PROADIFEN		DTC
CYP2D6	CYP2D6	Definite	CYP2D6	TROGLITAZONE		DTC	22931300
CYP2D6	CYP2D6	Definite	CYP2D6	4',7-DIMETHOXY-5-HYDROXYGENISTEIN		DTC
CYP2D6	CYP2D6	Definite	CYP2D6	DACARBAZINE		DTC	22931300
CYP2D6	CYP2D6	Definite	CYP2D6	CHEMBL279556		DTC
CYP2D6	CYP2D6	Definite	CYP2D6	TRIAMCINOLONE		DTC	22931300
CYP2D6	CYP2D6	Definite	CYP2D6	CHEMBL1520837		DTC
CYP2D6	CYP2D6	Definite	CYP2D6	CHEMBL277525		DTC
CYP2D6	CYP2D6	Definite	CYP2D6	CHEMBL338115		DTC
CYP2D6	CYP2D6	Definite	CYP2D6	ESTRADIOL		DTC	22931300
CYP2D6	CYP2D6	Definite	CYP2D6	NIGULDIPINE		DTC
CYP2D6	CYP2D6	Definite	CYP2D6	CLOPIDOGREL		DTC
CYP2D6	CYP2D6	Definite	CYP2D6	NIFEDIPINE		DTC	22931300
CYP2D6	CYP2D6	Definite	CYP2D6	ARASERTACONAZOLE		DTC
CYP2D6	CYP2D6	Definite	CYP2D6	CHEMBL1371696		DTC
CYP2D6	CYP2D6	Definite	CYP2D6	TROPISETRON		PharmGKB	12728290|12065557
CYP2D6	CYP2D6	Definite	CYP2D6	NALBUPHINE		DTC	22931300
CYP2D6	CYP2D6	Definite	CYP2D6	HARMAN		DTC
CYP2D6	CYP2D6	Definite	CYP2D6	DACTINOMYCIN		DTC	22931300
CYP2D6	CYP2D6	Definite	CYP2D6	BUCLADESINE		DTC
CYP2D6	CYP2D6	Definite	CYP2D6	PSORALEN		DTC
CYP2D6	CYP2D6	Definite	CYP2D6	DANAZOL		DTC	22931300
CYP2D6	CYP2D6	Definite	CYP2D6	PIROXICAM		DTC	22931300
CYP2D6	CYP2D6	Definite	CYP2D6	NIMESULIDE		DTC	22931300
CYP2D6	CYP2D6	Definite	CYP2D6	CLOZAPINE		FDA
CYP2D6	CYP2D6	Definite	CYP2D6	TRAMADOL		FDA
CYP2D6	CYP2D6	Definite	CYP2D6	LAMOTRIGINE		DTC	22931300
CYP2D6	CYP2D6	Definite	CYP2D6	AMPHOTERICIN B		DTC	22931300
CYP2D6	CYP2D6	Definite	CYP2D6	BERGAMOTTIN		DTC
CYP2D6	CYP2D6	Definite	CYP2D6	SB-202190		DTC
CYP2D6	CYP2D6	Definite	CYP2D6	SPICLOMAZINE		DTC
CYP2D6	CYP2D6	Definite	CYP2D6	MIBEFRADIL		DTC
CYP2D6	CYP2D6	Definite	CYP2D6	CEFOPERAZONE		DTC	22931300
CYP2D6	CYP2D6	Definite	CYP2D6	XYLOMETAZOLINE		DTC
CYP2D6	CYP2D6	Definite	CYP2D6	E324		DTC
CYP2D6	CYP2D6	Definite	CYP2D6	MENADIONE		DTC
CYP2D6	CYP2D6	Definite	CYP2D6	LIOTHYRONINE		DTC	22931300
CYP2D6	CYP2D6	Definite	CYP2D6	FLUPIRTINE		DTC
CYP2D6	CYP2D6	Definite	CYP2D6	MINOXIDIL		DTC	22931300
CYP2D6	CYP2D6	Definite	CYP2D6	CARBETAPENTANE CITRATE		DTC
CYP2D6	CYP2D6	Definite	CYP2D6	BENZYDAMINE		DTC
CYP2D6	CYP2D6	Definite	CYP2D6	CHEMBL585045		DTC
CYP2D6	CYP2D6	Definite	CYP2D6	CHEMBL188641		DTC
CYP2D6	CYP2D6	Definite	CYP2D6	IPRONIAZID		DTC	22931300
CYP2D6	CYP2D6	Definite	CYP2D6	ESCITALOPRAM		FDA
NDUFAF2	NDUFAF2	Definite	NDUFAF2	METFORMIN HYDROCHLORIDE	inhibitor	ChemblInteractions
NDUFAF2	NDUFAF2	Definite	NDUFAF2	NV-128	inhibitor	ChemblInteractions
NDUFAF2	NDUFAF2	Definite	NDUFAF2	ME-344	inhibitor	ChemblInteractions
RARB	RARB	Definite	RARB	ETRETINATE	agonist	ChemblInteractions	9298126|8301142
RARB	RARB	Definite	RARB	TAMIBAROTENE	agonist	TdgClinicalTrial|TEND|GuideToPharmacology|TTD	17611697|15843826|17925887|15563242
RARB	RARB	Definite	RARB	ALITRETINOIN	agonist	ChemblInteractions|TEND|GuideToPharmacology|TTD	16128742|16531051|16316409|19678713|16297713|16253547
RARB	RARB	Definite	RARB	TAZAROTENE	agonist	TdgClinicalTrial|ChemblInteractions|TEND|GuideToPharmacology	18034539|12942109|9035701|15102095
RARB	RARB	Definite	RARB	ACITRETIN	agonist	ChemblInteractions	11586072|7755585|19144697
RARB	RARB	Definite	RARB	TRIFAROTENE	agonist	GuideToPharmacology	29974453
RARB	RARB	Definite	RARB	ADAPALENE	agonist	TdgClinicalTrial|ChemblInteractions|TEND|GuideToPharmacology	31273085|19929446|9557255|9204085|11752352|10651997|9990413
RARB	RARB	Definite	RARB	FENRETINIDE		TdgClinicalTrial
RARB	RARB	Definite	RARB	CHEMBL425027		DTC	19239230
RARB	RARB	Definite	RARB	MOFAROTENE	modulator	ChemblInteractions
RARB	RARB	Definite	RARB	ISOTRETINOIN	agonist	ChemblInteractions
RARB	RARB	Definite	RARB	CHEMBL472172		DTC	19216008|18702457
RARB	RARB	Definite	RARB	IRX4310	antagonist	ChemblInteractions
RARB	RARB	Definite	RARB	CHEMBL275311		DTC	18951029|15546741|10592235
RARB	RARB	Definite	RARB	TRETINOIN	agonist	ChemblInteractions|GuideToPharmacology	15958702
METTL21A	METTL21A	Definite	METTL21A	CITALOPRAM		PharmGKB	20643483|17548750
KLC1	KLC1	Definite	KLC1	FLUOROURACIL		PharmGKB	17549067
KLC1	KLC1	Definite	KLC1	LEUCOVORIN		PharmGKB	17549067
KLC1	KLC1	Definite	KLC1	IRINOTECAN		PharmGKB	17549067
TPM3	TPM3	Definite	TPM3	METHOTREXATE		NCI	8509220
TPM3	TPM3	Definite	TPM3	EPINEPHRINE		NCI	18172836
TPM3	TPM3	Definite	TPM3	CORTICOTROPIN		NCI	17877367
TPM3	TPM3	Definite	TPM3	PROGESTERONE		NCI	17549730
TPM3	TPM3	Definite	TPM3	APAZIQUONE		NCI	8509220
TPM3	TPM3	Definite	TPM3	MIDAZOLAM		NCI	16738805
TPM3	TPM3	Definite	TPM3	SIMVASTATIN		NCI	10720627
TPM3	TPM3	Definite	TPM3	THIOGUANINE		NCI	7687657
SLC19A3	SLC19A3	Definite	SLC19A3	METFORMIN		PharmGKB	26528626
CYB5R4	CYB5R4	Definite	CYB5R4	RASBURICASE		PharmGKB
CYB5R4	CYB5R4	Definite	CYB5R4	PRIMAQUINE		PharmGKB
CYB5R4	CYB5R4	Definite	CYB5R4	METOCLOPRAMIDE		PharmGKB
MAPKAPK3	MAPKAPK3	Definite	MAPKAPK3	LAUROGUADINE		DTC
NFKB2	NFKB2	Definite	NFKB2	CHEMBL406557		DTC
NFKB2	NFKB2	Definite	NFKB2	BORTEZOMIB	inhibitor	TALC|TTD
NFKB2	NFKB2	Definite	NFKB2	CHEMBL528694		DTC
NFKB2	NFKB2	Definite	NFKB2	CHEMBL2094789		DTC
NFKB2	NFKB2	Definite	NFKB2	QUERCETAGETIN		DTC	25190466
NFKB2	NFKB2	Definite	NFKB2	PARTHENOLIDE		DTC|TTD	25190466
NFKB2	NFKB2	Definite	NFKB2	QUERCETIN		DTC	25190466
NFKB2	NFKB2	Definite	NFKB2	ACACETIN		DTC	25190466
NFKB2	NFKB2	Definite	NFKB2	GOSSYPETIN		DTC	25190466
NFKB2	NFKB2	Definite	NFKB2	ARTESUNATE		DTC	25074847
NFKB2	NFKB2	Definite	NFKB2	6,4'-DIMETHOXYFLAVONE		DTC
NFKB2	NFKB2	Definite	NFKB2	PECTOLINARIGENIN		DTC
NFKB2	NFKB2	Definite	NFKB2	ISORHAMNETIN		DTC	25190466
NFKB2	NFKB2	Definite	NFKB2	CHEMBL84010		DTC
NFKB2	NFKB2	Definite	NFKB2	RESVERATROL		DTC
NFKB2	NFKB2	Definite	NFKB2	TRIPTOLIDE		TTD
NFKB2	NFKB2	Definite	NFKB2	CHEMBL85826		DTC
NFKB2	NFKB2	Definite	NFKB2	SULFASALAZINE		TTD
NFKB2	NFKB2	Definite	NFKB2	CHEMBL408850		DTC
NFKB2	NFKB2	Definite	NFKB2	APIGENIN		DTC	25190466
NFKB2	NFKB2	Definite	NFKB2	4',7-DIMETHOXY-5-HYDROXYGENISTEIN		DTC
NFKB2	NFKB2	Definite	NFKB2	CHEMBL260560		DTC
NFKB2	NFKB2	Definite	NFKB2	DIOSMETIN		DTC	25190466
NFKB2	NFKB2	Definite	NFKB2	EDASALONEXENT		TTD
NFKB2	NFKB2	Definite	NFKB2	RUTIN		DTC	25496805
NFKB2	NFKB2	Definite	NFKB2	KAEMPFERIDE		DTC	25190466
NFKB2	NFKB2	Definite	NFKB2	LUTEOLIN		DTC	25190466
NFKB2	NFKB2	Definite	NFKB2	CHEMBL602718		DTC
NFKB2	NFKB2	Definite	NFKB2	CHEMBL1405979		DTC
NFKB2	NFKB2	Definite	NFKB2	KAEMPFEROL		DTC	25190466
NFKB2	NFKB2	Definite	NFKB2	CHEMBL502774		DTC
NFKB2	NFKB2	Definite	NFKB2	LAQUINIMOD		TTD
NFKB2	NFKB2	Definite	NFKB2	CHEMBL201325		DTC
NFKB2	NFKB2	Definite	NFKB2	TAMARIXETIN		DTC	25190466
NFKB2	NFKB2	Definite	NFKB2	CHEMBL428789		DTC
NFKB2	NFKB2	Definite	NFKB2	SORBINIL		DTC	24819954
NFKB2	NFKB2	Definite	NFKB2	CHRYSOERIOL		DTC	25190466
NFKB2	NFKB2	Definite	NFKB2	INDOPROFEN		DTC
NFKB2	NFKB2	Definite	NFKB2	VADIMEZAN		TTD
NFKB2	NFKB2	Definite	NFKB2	FRENTIZOLE		DTC
IDH2	IDH2	Definite	IDH2	ENASIDENIB	inhibitor	JAX-CKB|CGI|CIViC|GuideToPharmacology|PharmGKB|FDA|OncoKB	27721426|28588020|28193778
IDH2	IDH2	Definite	IDH2	VENETOCLAX		JAX-CKB|CGI|CIViC|PharmGKB|FDA	27520294|30725494
IDH2	IDH2	Definite	IDH2	DASATINIB		JAX-CKB|CGI	27231123
IDH2	IDH2	Definite	IDH2	SARACATINIB		JAX-CKB	27231123
IDH2	IDH2	Definite	IDH2	QUIZARTINIB		JAX-CKB
IDH2	IDH2	Definite	IDH2	OLAPARIB		CIViC	28148839
UGGT2	UGGT2	Definite	UGGT2	HYDROCHLOROTHIAZIDE		PharmGKB
MITF	MITF	Definite	MITF	CHEMBL259784		DTC
MITF	MITF	Definite	MITF	CHEMBL588965		DTC
MITF	MITF	Definite	MITF	HOMIDIUM BROMIDE		DTC
MITF	MITF	Definite	MITF	PIPLARTINE		DTC
MITF	MITF	Definite	MITF	METAPHIT METHANESULFONATE		DTC
MITF	MITF	Definite	MITF	CHEMBL597649		DTC
MITF	MITF	Definite	MITF	PERHEXILINE MALEATE		DTC
MITF	MITF	Definite	MITF	CHEMBL125044		DTC
MITF	MITF	Definite	MITF	CHEMBL405914		DTC
MITF	MITF	Definite	MITF	CHEMBL601146		DTC
MITF	MITF	Definite	MITF	8-AZAGUANINE		DTC
MITF	MITF	Definite	MITF	CHEMBL1373255		DTC
MITF	MITF	Definite	MITF	CHEMBL583997		DTC
MITF	MITF	Definite	MITF	CHEMBL582722		DTC
MITF	MITF	Definite	MITF	ARTEANNUIN B		DTC
MITF	MITF	Definite	MITF	CHEMBL601351		DTC
MITF	MITF	Definite	MITF	CHEMBL1989750		DTC
MITF	MITF	Definite	MITF	CHEMBL95704		DTC
MITF	MITF	Definite	MITF	CHEMBL602718		DTC
MITF	MITF	Definite	MITF	CHEMBL1343568		DTC
MITF	MITF	Definite	MITF	CHEMBL536375		DTC
MITF	MITF	Definite	MITF	AURIN		DTC
MITF	MITF	Definite	MITF	CHEMBL1490332		DTC
MITF	MITF	Definite	MITF	CHEMBL482050		DTC
MITF	MITF	Definite	MITF	CHEMBL1486366		DTC
MITF	MITF	Definite	MITF	CHEMBL1098875		DTC
MITF	MITF	Definite	MITF	CHEMBL609606		DTC
MITF	MITF	Definite	MITF	CHEMBL415711		DTC
MITF	MITF	Definite	MITF	CHEMBL22062		DTC
MITF	MITF	Definite	MITF	CHEMBL578905		DTC
MITF	MITF	Definite	MITF	CHEMBL408653		DTC
MITF	MITF	Definite	MITF	CHEMBL591834		DTC
MITF	MITF	Definite	MITF	CHEMBL578502		DTC
MITF	MITF	Definite	MITF	CHEMBL578675		DTC
MITF	MITF	Definite	MITF	CHEMBL1442783		DTC
MITF	MITF	Definite	MITF	CHEMBL534535		DTC
MITF	MITF	Definite	MITF	CHEMBL533082		DTC
MITF	MITF	Definite	MITF	CHEMBL84010		DTC
MITF	MITF	Definite	MITF	NIFUROXAZIDE		DTC
MITF	MITF	Definite	MITF	CHEMBL602990		DTC
MITF	MITF	Definite	MITF	CHEMBL1594756		DTC
MITF	MITF	Definite	MITF	CHEMBL1478462		DTC
MITF	MITF	Definite	MITF	CHEMBL1576310		DTC
MITF	MITF	Definite	MITF	CHEMBL591370		DTC
MITF	MITF	Definite	MITF	CHEMBL1453126		DTC
MITF	MITF	Definite	MITF	CHEMBL601140		DTC
MITF	MITF	Definite	MITF	CHEMBL589715		DTC
MITF	MITF	Definite	MITF	CHEMBL579957		DTC
MITF	MITF	Definite	MITF	CHEMBL534244		DTC
MITF	MITF	Definite	MITF	SELUMETINIB		CIViC	24185007
MITF	MITF	Definite	MITF	PLX-4720		CIViC	24185007
MITF	MITF	Definite	MITF	DABRAFENIB		CIViC	24265153
MITF	MITF	Definite	MITF	VEMURAFENIB		CIViC	24265153
SLC39A8	SLC39A8	Definite	SLC39A8	ALCOHOL		PharmGKB	32451486
DRD2	DRD2	Definite	DRD2	ASENAPINE	antagonist	TdgClinicalTrial|TEND|GuideToPharmacology	21658377|18308814|21655346
DRD2	DRD2	Definite	DRD2	OLANZAPINE	agonist|antagonist	TdgClinicalTrial|ChemblInteractions|TEND|GuideToPharmacology|PharmGKB|TTD	22967772|9713903|20714340|15694263|14575800|28673279|23859574|18180754|16730699|11505224|17092971|17105675|17316700|18926547|16123753|11920858|991813|14610521|17848919|17067304|18086475|18579277|20375926|25563748|11752352|9858029|15830237|25032030|26872113|17767146|16513877|23851570|20194480|9918131|21095016
DRD2	DRD2	Definite	DRD2	ASENAPINE MALEATE	antagonist	ChemblInteractions
DRD2	DRD2	Definite	DRD2	CLOZAPINE	antagonist	DTC|TdgClinicalTrial|ChemblInteractions|NCI|TEND|GuideToPharmacology|PharmGKB	9713903|15781964|20714340|15694263|14575800|28673279|23859574|18180754|11505224|17105675|15286066|18926547|16123753|11920858|21421319|991813|14610521|12769622|18086475|18579277|20375926|11752352|9858029|15830237|26872113|17767146|16513877|16040180|23851570|20194480|9918131|12887421
DRD2	DRD2	Definite	DRD2	ROPINIROLE	agonist	TdgClinicalTrial|TEND|GuideToPharmacology|PharmGKB|TTD	19557097|10446316|18691132|10641988|18808942|11752352|17573046|1683559
DRD2	DRD2	Definite	DRD2	SERTINDOLE	antagonist	TdgClinicalTrial|TEND|GuideToPharmacology	16925508|19506838|11752352|18293356|20856607
DRD2	DRD2	Definite	DRD2	SULPIRIDE	antagonist	DTC|TdgClinicalTrial|TEND|GuideToPharmacology|TTD	22632094|7518029|12010185|11752352
DRD2	DRD2	Definite	DRD2	BIFEPRUNOX	partial agonist	TdgClinicalTrial|ChemblInteractions	17393144|17659474
DRD2	DRD2	Definite	DRD2	REMOXIPRIDE	antagonist	TdgClinicalTrial|TEND	8665533|11873706|11752352
DRD2	DRD2	Definite	DRD2	DAPIPRAZOLE		TTD
DRD2	DRD2	Definite	DRD2	LUMATEPERONE	partial agonist|antagonist	TdgClinicalTrial|ChemblInteractions|GuideToPharmacology	30596390
DRD2	DRD2	Definite	DRD2	ILOPERIDONE	antagonist	TdgClinicalTrial|ChemblInteractions|TEND|TTD	12861482|8997630
DRD2	DRD2	Definite	DRD2	CARPHENAZINE	antagonist	TdgClinicalTrial|TEND|TTD	4887393|4889058|11752352|4861216
DRD2	DRD2	Definite	DRD2	PERGOLIDE	agonist	TdgClinicalTrial|TEND|GuideToPharmacology|PharmGKB|TTD	16842172|2860228|18691132|3828803|1674528|10641988|18808942|11752352|10516878
DRD2	DRD2	Definite	DRD2	ARIPIPRAZOLE	antagonist|partial agonist|agonist	TdgClinicalTrial|ChemblInteractions|TEND|GuideToPharmacology|PharmGKB|TTD	9713903|15694263|28673279|16973280|11505224|17105675|9083792|18926547|16123753|11920858|991813|14610521|16925992|16981227|18583979|19158809|19900188|10327430|11752352|16366516|9858029|15830237|16513877|18687376|20194480|17501690|9918131|15567074|17087792|19582781|26346901
DRD2	DRD2	Definite	DRD2	MEPHENTERMINE		TTD
DRD2	DRD2	Definite	DRD2	PHENOXYBENZAMINE		TTD
DRD2	DRD2	Definite	DRD2	LEVODOPA	agonist	TdgClinicalTrial|TEND|PharmGKB|TTD	11978145|18549347|15824260|15710490|17553470|27779245|15728856|9633680
DRD2	DRD2	Definite	DRD2	METOCLOPRAMIDE	antagonist	TdgClinicalTrial|TEND|TTD	21585331|8230103|15835479|8981558|11752352|9876882|8730709|7745844
DRD2	DRD2	Definite	DRD2	PROCHLORPERAZINE	antagonist	TdgClinicalTrial|ChemblInteractions|TEND|GuideToPharmacology|PharmGKB|TTD	17044574|2527092|17169748|18955042|18534808|11752352|24360851|16677982
DRD2	DRD2	Definite	DRD2	FLUPENTIXOL	antagonist	DTC|GuideToPharmacology	6149133|8797192|21421319|1674528|11873706|7498321|17111172|11752352
DRD2	DRD2	Definite	DRD2	HALOPERIDOL	antagonist|inverse agonist	DTC|TdgClinicalTrial|ChemblInteractions|NCI|TEND|GuideToPharmacology|PharmGKB|TTD	15894081|15184239|19603545|15492764|18180754|27023437|16730699|15286066|10823405|18855532|17316700|18926547|18781856|17134027|12587665|11329406|21421319|1839129|19179847|19944883|1969501|18086475|7520908|10395223|18781857|15077009|11752352|17989061|15830237|17767146|18354387|9672901|19396436|12629531|15146457|19273465|19853839|10862524|12887421|19373123|20643630|16132064
DRD2	DRD2	Definite	DRD2	SUMANIROLE	agonist	GuideToPharmacology|TTD
DRD2	DRD2	Definite	DRD2	PEROSPIRONE	antagonist	GuideToPharmacology	9595296
DRD2	DRD2	Definite	DRD2	ROTIGOTINE	agonist	TdgClinicalTrial|ChemblInteractions|TEND|GuideToPharmacology	18691132
DRD2	DRD2	Definite	DRD2	CHLORPROMAZINE	antagonist	ChemblInteractions|GuideToPharmacology|PharmGKB|TTD	7908055|15694263|28673279|11505224|17105675|18926547|16867246|11873706|11103886|11752352|9858029|15830237|16513877|8524985|20194480|9918131|20643630
DRD2	DRD2	Definite	DRD2	QUETIAPINE	antagonist	DTC|TdgClinicalTrial|TEND|GuideToPharmacology|TTD	21421319|17848919|11132243|11873706|10839333|11752352
DRD2	DRD2	Definite	DRD2	AMPHETAMINE	binder	PharmGKB	1532675
DRD2	DRD2	Definite	DRD2	ACETOPHENAZINE	antagonist	TdgClinicalTrial|TEND|TTD	6147851|11873706|11752352|17139284|17016423
DRD2	DRD2	Definite	DRD2	ALCOHOL		NCI|PharmGKB	1839129|12749054|1969501|1979357|27447243|10490697|8033754|17989061|22798433|11054774|29236941
DRD2	DRD2	Definite	DRD2	ZIPRASIDONE HYDROCHLORIDE	antagonist	ChemblInteractions
DRD2	DRD2	Definite	DRD2	DIACETYLMORPHINE		PharmGKB
DRD2	DRD2	Definite	DRD2	PRAMIPEXOLE	agonist	TdgClinicalTrial|TEND|GuideToPharmacology|TTD	22023785|9617505|18691132|10641988|9638397|11752352
DRD2	DRD2	Definite	DRD2	AMISULPRIDE	antagonist	TdgClinicalTrial|TEND|GuideToPharmacology|PharmGKB|TTD	12404702|11873706|25679126|16696579
DRD2	DRD2	Definite	DRD2	ROXINDOLE	agonist|antagonist	GuideToPharmacology|TTD
DRD2	DRD2	Definite	DRD2	LOXAPINE	antagonist	TdgClinicalTrial|ChemblInteractions|TEND|GuideToPharmacology|TTD	9570468|8665533|9342550|8101879|11752352|6239298|15694653
DRD2	DRD2	Definite	DRD2	DOPAMINE	agonist	GuideToPharmacology|TTD	17301410|11752352
DRD2	DRD2	Definite	DRD2	LISURIDE	agonist	TdgClinicalTrial|TEND|GuideToPharmacology|TTD	18691132|11752352
DRD2	DRD2	Definite	DRD2	ANIRACETAM		TTD	11412837
DRD2	DRD2	Definite	DRD2	TRIFLUPROMAZINE	antagonist	TdgClinicalTrial|ChemblInteractions|TEND	239169|30137788|17139284|9081563|17016423
DRD2	DRD2	Definite	DRD2	DOMPERIDONE	antagonist	TdgClinicalTrial|TEND|GuideToPharmacology|TTD	15894081|18970411|12010185|11752352|1683559
DRD2	DRD2	Definite	DRD2	PERPHENAZINE	antagonist	TdgClinicalTrial|ChemblInteractions|TEND|GuideToPharmacology|TTD	2573104|7508675|11873706|11752352|15007534|7828655
DRD2	DRD2	Definite	DRD2	CARPHENAZINE MALEATE	antagonist	ChemblInteractions
DRD2	DRD2	Definite	DRD2	MOLINDONE	antagonist	TdgClinicalTrial|TEND|TTD	9342550|9577836|11752352|9353417|17016423
DRD2	DRD2	Definite	DRD2	MINAPRINE	agonist	TdgClinicalTrial|TEND	7862862|17139284|17016423
DRD2	DRD2	Definite	DRD2	COCAINE		PharmGKB
DRD2	DRD2	Definite	DRD2	FLUPHENAZINE DECANOATE	antagonist	ChemblInteractions
DRD2	DRD2	Definite	DRD2	BREXPIPRAZOLE	agonist|partial agonist	TdgClinicalTrial|ChemblInteractions|GuideToPharmacology|TTD	24947465
DRD2	DRD2	Definite	DRD2	ZIPRASIDONE	antagonist	TdgClinicalTrial|TEND|GuideToPharmacology|TTD	15726024|17848919|7562537|11873706|11752352|14728084
DRD2	DRD2	Definite	DRD2	METARAMINOL		TTD
DRD2	DRD2	Definite	DRD2	CARMOXIROLE		TTD
DRD2	DRD2	Definite	DRD2	APOMORPHINE	agonist	TdgClinicalTrial|TEND|GuideToPharmacology|TTD	11343576|15037665|10494453|18691132|11215397|10641988|11752352|11212866|11692072
DRD2	DRD2	Definite	DRD2	CABERGOLINE	agonist	TdgClinicalTrial|ChemblInteractions|TEND|GuideToPharmacology|PharmGKB|TTD	12721865|18303487|8951172|12008749|12464354|18808942|15341508|11436517|11752352
DRD2	DRD2	Definite	DRD2	THIETHYLPERAZINE	antagonist	TdgClinicalTrial|TEND|TTD	15469457|17139284|17016423
DRD2	DRD2	Definite	DRD2	VILAZODONE	agonist	GuideToPharmacology
DRD2	DRD2	Definite	DRD2	CARIPRAZINE	partial agonist|agonist	TdgClinicalTrial|GuideToPharmacology|TTD	23320989
DRD2	DRD2	Definite	DRD2	FLUPHENAZINE ENANTHATE	antagonist	ChemblInteractions
DRD2	DRD2	Definite	DRD2	ORDOPIDINE	modulator	ChemblInteractions
DRD2	DRD2	Definite	DRD2	LURASIDONE HYDROCHLORIDE	antagonist	ChemblInteractions
DRD2	DRD2	Definite	DRD2	QUINPIROLE	agonist	DTC|GuideToPharmacology	21536445|21388142|26164842|21999579|25969169
DRD2	DRD2	Definite	DRD2	METHYLPHENIDATE		PharmGKB	26810137
DRD2	DRD2	Definite	DRD2	PALIPERIDONE	antagonist	TdgClinicalTrial|ChemblInteractions|TEND	11132243|12211096|11752352|7524043|16119512|7531353|16513859
DRD2	DRD2	Definite	DRD2	PARDOPRUNOX	partial agonist	TdgClinicalTrial|ChemblInteractions|TTD
DRD2	DRD2	Definite	DRD2	TRIMIPRAMINE MALEATE	antagonist	ChemblInteractions
DRD2	DRD2	Definite	DRD2	TIAPRIDE	blocker	TTD	11520476
DRD2	DRD2	Definite	DRD2	BUSPIRONE	antagonist	TdgClinicalTrial|TEND	16214127|14522358|12781354|11421254|11224194
DRD2	DRD2	Definite	DRD2	FLUPHENAZINE	antagonist	TdgClinicalTrial|TEND|GuideToPharmacology	7508675|11873706|11752352|7828655
DRD2	DRD2	Definite	DRD2	ROPINIROLE HYDROCHLORIDE	agonist	ChemblInteractions
DRD2	DRD2	Definite	DRD2	PIMOZIDE	antagonist	TdgClinicalTrial|ChemblInteractions|TEND|GuideToPharmacology|TTD	8301582|7855217|8082693|11873706|10503726|11752352|2378927|12828573
DRD2	DRD2	Definite	DRD2	TRIFLUOPERAZINE	antagonist	TdgClinicalTrial|TEND|GuideToPharmacology	8102973|1676523|11873706|11752352|15695070|945467
DRD2	DRD2	Definite	DRD2	BEVANTOLOL		TTD
DRD2	DRD2	Definite	DRD2	NAPHAZOLINE		TTD
DRD2	DRD2	Definite	DRD2	ONC-201		TTD
DRD2	DRD2	Definite	DRD2	MELEVODOPA		TdgClinicalTrial
DRD2	DRD2	Definite	DRD2	STEPHOLIDINE		DTC	19744859
DRD2	DRD2	Definite	DRD2	RISPERIDONE	antagonist	DTC|TdgClinicalTrial|ChemblInteractions|TEND|GuideToPharmacology|PharmGKB|TTD	15184239|9713903|20714340|19603545|15694263|28673279|23859574|15492764|18180754|17059881|16730699|11505224|17105675|15286066|10823405|18855532|18926547|16123753|18781856|11920858|12587665|11329406|21421319|991813|14610521|1839129|11132243|19179847|19944883|1969501|18086475|18579277|10395223|20375926|18781857|15077009|11752352|17989061|9858029|15830237|25943458|26872113|17767146|15140279|16513877|…
DRD2	DRD2	Definite	DRD2	ABAPERIDONE		TTD
DRD2	DRD2	Definite	DRD2	PERGOLIDE MESYLATE	agonist	ChemblInteractions
DRD2	DRD2	Definite	DRD2	CHLORPROTHIXENE	antagonist	TdgClinicalTrial|ChemblInteractions|TEND|TTD	1830565|19091563|8101879|11752352
DRD2	DRD2	Definite	DRD2	MESORIDAZINE	antagonist	TdgClinicalTrial|TEND|GuideToPharmacology|TTD	15357957|11752352|16135699
DRD2	DRD2	Definite	DRD2	OCAPERIDONE		TTD	10592235
DRD2	DRD2	Definite	DRD2	ERGONOVINE		TTD
DRD2	DRD2	Definite	DRD2	THIORIDAZINE HYDROCHLORIDE	antagonist	ChemblInteractions
DRD2	DRD2	Definite	DRD2	APOMORPHINE HYDROCHLORIDE	agonist	ChemblInteractions
DRD2	DRD2	Definite	DRD2	ZUCLOPENTHIXOL	antagonist	TdgClinicalTrial|TEND|TTD	17535043|11752352|8748043|1822319
DRD2	DRD2	Definite	DRD2	PIPERACETAZINE		TTD
DRD2	DRD2	Definite	DRD2	LOXAPINE HYDROCHLORIDE	antagonist	ChemblInteractions
DRD2	DRD2	Definite	DRD2	PHENYLEPHRINE		TTD
DRD2	DRD2	Definite	DRD2	THIORIDAZINE	antagonist	TdgClinicalTrial|ChemblInteractions|TEND|TTD	7689973|9292626|1978482|16434058|1352051
DRD2	DRD2	Definite	DRD2	AMOXAPINE	antagonist	ChemblInteractions	1966571|11180191
DRD2	DRD2	Definite	DRD2	SARIZOTAN	partial agonist	TTD	14767715
DRD2	DRD2	Definite	DRD2	CARIPRAZINE HYDROCHLORIDE	modulator	ChemblInteractions
DRD2	DRD2	Definite	DRD2	PIPOTIAZINE	antagonist	GuideToPharmacology	15694263|2875894|16867246|11873706|11103886|11752352|20643630
DRD2	DRD2	Definite	DRD2	LURASIDONE	antagonist	TdgClinicalTrial|TEND	23545936
DRD2	DRD2	Definite	DRD2	FLUSPIRILENE	antagonist	TdgClinicalTrial|TEND|TTD	8935801|11752352|17139284|11842444|17016423
DRD2	DRD2	Definite	DRD2	THIETHYLPERAZINE MALATE	antagonist	ChemblInteractions
DRD2	DRD2	Definite	DRD2	METOCLOPRAMIDE HYDROCHLORIDE	antagonist	ChemblInteractions
DRD2	DRD2	Definite	DRD2	HALOPERIDOL LACTATE	inverse agonist	ChemblInteractions
DRD2	DRD2	Definite	DRD2	EPHEDRINE		TTD
DRD2	DRD2	Definite	DRD2	5-OH-DPAT		DTC	3783613
DRD2	DRD2	Definite	DRD2	PHENYLTOLOXAMINE		TTD
DRD2	DRD2	Definite	DRD2	METHADONE		PharmGKB	21902500|23651024|18687376|19373123|25556837
DRD2	DRD2	Definite	DRD2	THIOTHIXENE HYDROCHLORIDE	antagonist	ChemblInteractions
DRD2	DRD2	Definite	DRD2	NAFADOTRIDE	antagonist	GuideToPharmacology
DRD2	DRD2	Definite	DRD2	TERGURIDE	agonist|antagonist	GuideToPharmacology
DRD2	DRD2	Definite	DRD2	LEVOMEPROMAZINE	antagonist	ChemblInteractions|TTD	2870716|15701205|10592235
DRD2	DRD2	Definite	DRD2	PRAMIPEXOLE DIHYDROCHLORIDE	agonist	ChemblInteractions
DRD2	DRD2	Definite	DRD2	PRIDOPIDINE	modulator	TdgClinicalTrial|ChemblInteractions|TTD
DRD2	DRD2	Definite	DRD2	DROPERIDOL	antagonist	TdgClinicalTrial|ChemblInteractions|TEND|TTD	2527092|1549935|14633536|20358234
DRD2	DRD2	Definite	DRD2	PROCHLORPERAZINE EDISYLATE	antagonist	ChemblInteractions
DRD2	DRD2	Definite	DRD2	TOLAZOLINE		TTD
DRD2	DRD2	Definite	DRD2	BROMOCRIPTINE MESYLATE	agonist	ChemblInteractions
DRD2	DRD2	Definite	DRD2	MESORIDAZINE BESYLATE	antagonist	ChemblInteractions
DRD2	DRD2	Definite	DRD2	ETICLOPRIDE	antagonist	GuideToPharmacology
DRD2	DRD2	Definite	DRD2	APLINDORE FUMARATE	partial agonist	ChemblInteractions
DRD2	DRD2	Definite	DRD2	PIRIBEDIL	agonist	GuideToPharmacology	10728880
DRD2	DRD2	Definite	DRD2	PROCHLORPERAZINE MALEATE	antagonist	ChemblInteractions
DRD2	DRD2	Definite	DRD2	ITOPRIDE		TdgClinicalTrial	16495395|17300287
DRD2	DRD2	Definite	DRD2	BLONANSERIN	antagonist	GuideToPharmacology|TTD	20030420
DRD2	DRD2	Definite	DRD2	BENPERIDOL	antagonist	GuideToPharmacology
DRD2	DRD2	Definite	DRD2	PROPIOMAZINE	antagonist	TdgClinicalTrial|TEND	19110200|18471899|17139284|17016423|22507664
DRD2	DRD2	Definite	DRD2	PHENTOLAMINE		TTD
DRD2	DRD2	Definite	DRD2	E-FLUPENTIXOL		TdgClinicalTrial|TEND
DRD2	DRD2	Definite	DRD2	MORPHINE		NCI	11943831
DRD2	DRD2	Definite	DRD2	PERAZINE		TTD
DRD2	DRD2	Definite	DRD2	ETILEVODOPA		TdgClinicalTrial
DRD2	DRD2	Definite	DRD2	BROMOCRIPTINE	agonist	TdgClinicalTrial|TEND|GuideToPharmacology|TTD	18691132|11444429|10641988|10721819|12010185|11752352|12753422|10626749
DRD2	DRD2	Definite	DRD2	NICOTINE		PharmGKB	16123753|15203796
DRD2	DRD2	Definite	DRD2	PROMAZINE	antagonist	TdgClinicalTrial|TEND|GuideToPharmacology	19110200|18471899|17139284|17016423
DRD2	DRD2	Definite	DRD2	ERGOLOID MESYLATES	agonist	ChemblInteractions
DRD2	DRD2	Definite	DRD2	NEMONAPRIDE		PharmGKB|TTD	15184239|19603545|15694263|28673279|15492764|18180754|11505224|17105675|15286066|10823405|18855532|18926547|18781856|12587665|11329406|1839129|19179847|19944883|1969501|18086475|10395223|18781857|15077009|17989061|9858029|15830237|17767146|16513877|18354387|9672901|19396436|15146457|19273465|19853839|20194480|10862524|9918131|19373123
DRD2	DRD2	Definite	DRD2	BENZQUINAMIDE	agonist	GuideToPharmacology
DRD2	DRD2	Definite	DRD2	ZOTEPINE	antagonist	GuideToPharmacology	23427194
DRD2	DRD2	Definite	DRD2	ACETOPHENAZINE MALEATE	antagonist	ChemblInteractions
DRD2	DRD2	Definite	DRD2	RISPERDAL		TdgClinicalTrial
DRD2	DRD2	Definite	DRD2	THIOTHIXENE	antagonist	ChemblInteractions|TTD	15694263|3039860|16867246|11873706|11103886|11752352|20643630
DRD2	DRD2	Definite	DRD2	DOPEXAMINE		TTD
DRD2	DRD2	Definite	DRD2	OLANZAPINE PAMOATE	antagonist	ChemblInteractions
DRD2	DRD2	Definite	DRD2	DIHYDROERGOTAMINE		TTD
DRD2	DRD2	Definite	DRD2	TALIPEXOLE		TTD
DRD2	DRD2	Definite	DRD2	LITHIUM		NCI	8787189
DRD2	DRD2	Definite	DRD2	DENOPAMINE		TTD
DRD2	DRD2	Definite	DRD2	DEXPRAMIPEXOLE		TdgClinicalTrial
DRD2	DRD2	Definite	DRD2	BENZQUINAMIDE HYDROCHLORIDE	modulator	ChemblInteractions
DRD2	DRD2	Definite	DRD2	ZICRONAPINE		TTD
DRD2	DRD2	Definite	DRD2	RASAGILINE		PharmGKB	27190009
DRD2	DRD2	Definite	DRD2	QUINELORANE	agonist	GuideToPharmacology
DRD2	DRD2	Definite	DRD2	APLINDORE		TdgClinicalTrial
DRD2	DRD2	Definite	DRD2	BL-1020		TTD
DRD2	DRD2	Definite	DRD2	SARIZOTAN HYDROCHLORIDE	partial agonist	ChemblInteractions
DRD2	DRD2	Definite	DRD2	THIETHYLPERAZINE MALEATE	antagonist	ChemblInteractions
DRD2	DRD2	Definite	DRD2	METHAMPHETAMINE		TTD
DRD2	DRD2	Definite	DRD2	SUMATRIPTAN		PharmGKB	25096645
DRD2	DRD2	Definite	DRD2	LOXAPINE SUCCINATE	antagonist	ChemblInteractions
DRD2	DRD2	Definite	DRD2	FLUPHENAZINE HYDROCHLORIDE	antagonist	ChemblInteractions
DRD2	DRD2	Definite	DRD2	JNJ-37822681	antagonist	TdgClinicalTrial|TTD	22490380
DRD2	DRD2	Definite	DRD2	SERIDOPIDINE	modulator	ChemblInteractions
DRD2	DRD2	Definite	DRD2	TRIFLUPROMAZINE HYDROCHLORIDE	antagonist	ChemblInteractions
DRD2	DRD2	Definite	DRD2	MOLINDONE HYDROCHLORIDE	antagonist	ChemblInteractions
DRD2	DRD2	Definite	DRD2	UMESPIRONE		TTD
DRD2	DRD2	Definite	DRD2	ARIPIPRAZOLE LAUROXIL	partial agonist	ChemblInteractions
DRD2	DRD2	Definite	DRD2	HALOPERIDOL DECANOATE	inverse agonist	ChemblInteractions
DRD2	DRD2	Definite	DRD2	SB-773812	antagonist	ChemblInteractions
DRD2	DRD2	Definite	DRD2	DISULFIRAM		PharmGKB	23635803
DRD2	DRD2	Definite	DRD2	QUETIAPINE FUMARATE	antagonist	ChemblInteractions
DRD2	DRD2	Definite	DRD2	QUINAGOLIDE	agonist	TTD
DRD2	DRD2	Definite	DRD2	BUPROPION		PharmGKB	15184239|19603545|15492764|18180754|15286066|10823405|18855532|18926547|16123753|18781856|12587665|11329406|1839129|19179847|19944883|1969501|18086475|10395223|18781857|15077009|17989061|15830237|17767146|18354387|9672901|19396436|15146457|19273465|19853839|10862524|19373123
DRD2	DRD2	Definite	DRD2	TRIFLUOPERAZINE HYDROCHLORIDE	antagonist	ChemblInteractions
DRD2	DRD2	Definite	DRD2	ZIPRASIDONE MESYLATE	antagonist	ChemblInteractions
DRD2	DRD2	Definite	DRD2	DOCARPAMINE		TTD
DRD2	DRD2	Definite	DRD2	METHYLDOPA		TTD
DRD2	DRD2	Definite	DRD2	CHLORPROMAZINE HYDROCHLORIDE	antagonist	ChemblInteractions
DRD2	DRD2	Definite	DRD2	PROMAZINE HYDROCHLORIDE	antagonist	ChemblInteractions
DRD2	DRD2	Definite	DRD2	DIHYDREXIDINE		DTC	19744859
DRD2	DRD2	Definite	DRD2	PSEUDOEPHEDRINE		TTD
DRD2	DRD2	Definite	DRD2	RACLOPRIDE	antagonist	GuideToPharmacology	15010698
DRD2	DRD2	Definite	DRD2	BROMPERIDOL		PharmGKB	15694263|28673279|11505224|17105675|18926547|9858029|15830237|16513877|20194480|9918131
TSPO	TSPO	Definite	TSPO	ZALEPLON		TdgClinicalTrial|TEND	17139284|17016423
TSPO	TSPO	Definite	TSPO	ZOPICLONE	agonist	TdgClinicalTrial|TEND	21119734|17139284|17016423
TSPO	TSPO	Definite	TSPO	CLOTIAZEPAM		TTD
TSPO	TSPO	Definite	TSPO	QUAZEPAM		TTD
TSPO	TSPO	Definite	TSPO	DEXTOFISOPAM		TTD
TSPO	TSPO	Definite	TSPO	DIAZEPAM	potentiator	TEND|TTD	17631921|11752352
TSPO	TSPO	Definite	TSPO	ONO-2952		TTD
TSPO	TSPO	Definite	TSPO	ESTAZOLAM		TTD
TSPO	TSPO	Definite	TSPO	TEMAZEPAM		TdgClinicalTrial|TEND|TTD	12850901|16959136|7911332
TSPO	TSPO	Definite	TSPO	ESZOPICLONE	agonist	TdgClinicalTrial|TTD	17139284|18265473|17016423|19744401
TSPO	TSPO	Definite	TSPO	CLORAZEPIC ACID	agonist	TdgClinicalTrial|TEND|TTD	8787774
TSPO	TSPO	Definite	TSPO	METRONIDAZOLE		NCI	1320691
TSPO	TSPO	Definite	TSPO	ALPRAZOLAM		TEND|TTD
TSPO	TSPO	Definite	TSPO	CHLORMEZANONE	agonist	TdgClinicalTrial|TEND|TTD	11752352|17139284|17016423
TSPO	TSPO	Definite	TSPO	TRIAZOLAM		TEND|TTD	8787774
TSPO	TSPO	Definite	TSPO	ADINAZOLAM		TTD
TSPO	TSPO	Definite	TSPO	LORAZEPAM		TdgClinicalTrial|TEND|TTD	16959136|17156911|8787774|1647706
TSPO	TSPO	Definite	TSPO	FLUMAZENIL		TTD
TSPO	TSPO	Definite	TSPO	CINOLAZEPAM		TTD
TSPO	TSPO	Definite	TSPO	OLESOXIME		TdgClinicalTrial
TSPO	TSPO	Definite	TSPO	OXAZEPAM		TTD
TSPO	TSPO	Definite	TSPO	DIAZEPINOMICIN		TdgClinicalTrial|TTD
TSPO	TSPO	Definite	TSPO	HALAZEPAM		TTD
TSPO	TSPO	Definite	TSPO	PRAZEPAM		TTD
TSPO	TSPO	Definite	TSPO	ZOLPIDEM		TEND
TSPO	TSPO	Definite	TSPO	FLURAZEPAM		TTD
TSPO	TSPO	Definite	TSPO	FLUNITRAZEPAM	agonist	TdgClinicalTrial|TEND|TTD	9098698|1847384|1320691|1651852|2723642|19443999
TSPO	TSPO	Definite	TSPO	DISULFIRAM		NCI	1320691
TSPO	TSPO	Definite	TSPO	FLUDIAZEPAM		TTD
TSPO	TSPO	Definite	TSPO	CLONAZEPAM		TEND	10423168|1691678|2723642|10558889|2364987|11752352
TSPO	TSPO	Definite	TSPO	MIDAZOLAM		TTD
TSPO	TSPO	Definite	TSPO	PYRAZOLE		NCI	15544788
TSPO	TSPO	Definite	TSPO	CHLORDIAZEPOXIDE		TTD
TSPO	TSPO	Definite	TSPO	ALPIDEM		TTD
FBXL17	FBXL17	Definite	FBXL17	HYDROCHLOROTHIAZIDE		PharmGKB
CACNA1C	CACNA1C	Definite	CACNA1C	VERAPAMIL	inhibitor|blocker	TdgClinicalTrial|TEND|GuideToPharmacology|PharmGKB	15880143|19125880|9846638|20031608|15286207
CACNA1C	CACNA1C	Definite	CACNA1C	NICARDIPINE	inhibitor	TdgClinicalTrial|TEND	11752352
CACNA1C	CACNA1C	Definite	CACNA1C	AMLODIPINE BESYLATE	blocker	ChemblInteractions
CACNA1C	CACNA1C	Definite	CACNA1C	ALCOHOL		PharmGKB	31634677|12970385
CACNA1C	CACNA1C	Definite	CACNA1C	ELPETRIGINE	blocker	ChemblInteractions
CACNA1C	CACNA1C	Definite	CACNA1C	BENIDIPINE	antagonist|blocker	GuideToPharmacology	16565579
CACNA1C	CACNA1C	Definite	CACNA1C	IMAGABALIN	modulator	ChemblInteractions
CACNA1C	CACNA1C	Definite	CACNA1C	ISRADIPINE	inhibitor|blocker	TdgClinicalTrial|ChemblInteractions|TEND|GuideToPharmacology	12135765|10766758|9607315
CACNA1C	CACNA1C	Definite	CACNA1C	CLEVIDIPINE	blocker	TdgClinicalTrial|ChemblInteractions	15492770
CACNA1C	CACNA1C	Definite	CACNA1C	NIFEDIPINE	inhibitor|blocker	ChemblInteractions	19029287|9846638|11752352
CACNA1C	CACNA1C	Definite	CACNA1C	FELODIPINE	blocker|inhibitor	TdgClinicalTrial|ChemblInteractions	10525060|17475903|11752352
CACNA1C	CACNA1C	Definite	CACNA1C	ATAGABALIN	modulator	ChemblInteractions
CACNA1C	CACNA1C	Definite	CACNA1C	NIMODIPINE	blocker|inhibitor	ChemblInteractions|PharmGKB	20661350|17705883|20335610|20334460|11752352|19205682|19844625|8731425
CACNA1C	CACNA1C	Definite	CACNA1C	RITODRINE		PharmGKB	28391406
CACNA1C	CACNA1C	Definite	CACNA1C	VERAPAMIL HYDROCHLORIDE	blocker	ChemblInteractions
CACNA1C	CACNA1C	Definite	CACNA1C	NISOLDIPINE	blocker|inhibitor	ChemblInteractions|GuideToPharmacology	7592963|9584217|9846638|11752352
CACNA1C	CACNA1C	Definite	CACNA1C	HALOPERIDOL		PharmGKB	27023437
CACNA1C	CACNA1C	Definite	CACNA1C	MIBEFRADIL	inhibitor|blocker	GuideToPharmacology	10665814|10372226|16306443|16899990
CACNA1C	CACNA1C	Definite	CACNA1C	IBUTILIDE	activator	TdgClinicalTrial|TEND	9257085|15926871|11752352
CACNA1C	CACNA1C	Definite	CACNA1C	AMLODIPINE	inhibitor	TdgClinicalTrial	27556947|11752352|16322774
CACNA1C	CACNA1C	Definite	CACNA1C	DILTIAZEM HYDROCHLORIDE	blocker	ChemblInteractions
CACNA1C	CACNA1C	Definite	CACNA1C	DILTIAZEM	blocker	GuideToPharmacology	10226758
CACNA1C	CACNA1C	Definite	CACNA1C	BEPRIDIL HYDROCHLORIDE	blocker	ChemblInteractions
CACNA1C	CACNA1C	Definite	CACNA1C	PREGABALIN	modulator	ChemblInteractions
CACNA1C	CACNA1C	Definite	CACNA1C	CITALOPRAM		PharmGKB	19388002
CACNA1C	CACNA1C	Definite	CACNA1C	ATENOLOL		PharmGKB	20031608
CACNA1C	CACNA1C	Definite	CACNA1C	GABAPENTIN ENACARBIL	modulator	ChemblInteractions
CACNA1C	CACNA1C	Definite	CACNA1C	DRONEDARONE HYDROCHLORIDE	blocker	ChemblInteractions
CACNA1C	CACNA1C	Definite	CACNA1C	CELECOXIB		PharmGKB	22336956
CACNA1C	CACNA1C	Definite	CACNA1C	NICARDIPINE HYDROCHLORIDE	blocker	ChemblInteractions
CACNA1C	CACNA1C	Definite	CACNA1C	GABAPENTIN	modulator	ChemblInteractions
CACNA1C	CACNA1C	Definite	CACNA1C	AZD1305	blocker	ChemblInteractions
CACNA1C	CACNA1C	Definite	CACNA1C	AMLODIPINE MALEATE	blocker	ChemblInteractions
CACNA1C	CACNA1C	Definite	CACNA1C	DILTIAZEM MALATE	blocker	ChemblInteractions
OPCML	OPCML	Definite	OPCML	METHYLPHENIDATE		PharmGKB	29382897
POLR3G	POLR3G	Definite	POLR3G	NEVIRAPINE		PharmGKB	21810746
DIABLO	DIABLO	Definite	DIABLO	RESVERATROL		NCI	15837718|15469386
DIABLO	DIABLO	Definite	DIABLO	STAUROSPORINE		NCI	14985459|15466201
DIABLO	DIABLO	Definite	DIABLO	UCN-01		NCI	12488556
DIABLO	DIABLO	Definite	DIABLO	CLADRIBINE		NCI	12948851
GALNT2	GALNT2	Definite	GALNT2	ATENOLOL		PharmGKB
HSPD1	HSPD1	Definite	HSPD1	CETRORELIX		NCI	9805247
HSPD1	HSPD1	Definite	HSPD1	DIAPEP-277		TTD
HSPD1	HSPD1	Definite	HSPD1	ATORVASTATIN		NCI	15678257
CCNE1	CCNE1	Definite	CCNE1	DINACICLIB		ClearityFoundationBiomarkers|CIViC	27663592
CCNE1	CCNE1	Definite	CCNE1	PALBOCICLIB		CIViC	25557169|27020857|30807234
CCNE1	CCNE1	Definite	CCNE1	AMG-900		ClearityFoundationBiomarkers
CCNE1	CCNE1	Definite	CCNE1	ALISERTIB		ClearityFoundationBiomarkers
CCNE1	CCNE1	Definite	CCNE1	FULVESTRANT		CIViC	30807234
DPYD	DPYD	Definite	DPYD	CAPECITABINE		NCI|CGI|CIViC|FDA	16279094|23988873
DPYD	DPYD	Definite	DPYD	TEGAFUR		NCI|CGI|CIViC|PharmGKB	12209976|28950804|24923815|30858516|23603345|16115930|27122156|31382864|22490566|9470816|18600527|15944764|26603945|18443386|17700593|17165084|17000685|19530960|26794347|19795123|12360106|19473056|9439663|26099996|26216193|27864592|17121937|18299612|28295243|15132136|20819423|27995989|16151913|15017333|24817302|30114658|29846282|9323575|29134491|23988873|17203168|11895907|32378051|25677447|170648…
DPYD	DPYD	Definite	DPYD	FLUOROURACIL		NCI|CIViC|TTD|FDA	16421754|15330204|17179731|23988873|15538739|11501504|31871216
DPYD	DPYD	Definite	DPYD	IRINOTECAN		PharmGKB	28395759
DPYD	DPYD	Definite	DPYD	LEUCOVORIN		NCI|CIViC|PharmGKB	11977552|12576451|31871216
DPYD	DPYD	Definite	DPYD	FLUCYTOSINE		PharmGKB
DPYD	DPYD	Definite	DPYD	ENILURACIL		TdgClinicalTrial|TTD	16466986
DPYD	DPYD	Definite	DPYD	GIMERACIL	inhibitor	TdgClinicalTrial
DPYD	DPYD	Definite	DPYD	OXALIPLATIN		NCI	17127229
SMARCA4	SMARCA4	Definite	SMARCA4	VINORELBINE		CIViC	26671993
SMARCA4	SMARCA4	Definite	SMARCA4	CISPLATIN		CIViC	26671993
SMARCA4	SMARCA4	Definite	SMARCA4	ABEMACICLIB		CIViC	30718512|30718506
SMARCA4	SMARCA4	Definite	SMARCA4	TAZEMETOSTAT		CIViC	29650362
SMARCA4	SMARCA4	Definite	SMARCA4	TOZASERTIB		CIViC	28102363
SMARCA4	SMARCA4	Definite	SMARCA4	RIBOCICLIB		CIViC	30718512
SMARCA4	SMARCA4	Definite	SMARCA4	PALBOCICLIB		CIViC	30718512|30718506
CYP46A1	CYP46A1	Definite	CYP46A1	SOTICLESTAT		TTD
CATSPER2	CATSPER2	Definite	CATSPER2	PROGESTERONE	activator	GuideToPharmacology
CATSPER2	CATSPER2	Definite	CATSPER2	ALPROSTADIL	activator	GuideToPharmacology
CATSPER2	CATSPER2	Definite	CATSPER2	MIBEFRADIL	blocker	GuideToPharmacology
CATSPER2	CATSPER2	Definite	CATSPER2	DINOPROSTONE	activator	GuideToPharmacology
CACNA1D	CACNA1D	Definite	CACNA1D	FELODIPINE	inhibitor|blocker	TdgClinicalTrial|ChemblInteractions	19029287
CACNA1D	CACNA1D	Definite	CACNA1D	VERAPAMIL HYDROCHLORIDE	blocker	ChemblInteractions
CACNA1D	CACNA1D	Definite	CACNA1D	CELECOXIB		PharmGKB	22336956
CACNA1D	CACNA1D	Definite	CACNA1D	ISRADIPINE	blocker|inhibitor	ChemblInteractions|GuideToPharmacology	11285265|19029287
CACNA1D	CACNA1D	Definite	CACNA1D	GABAPENTIN	modulator	ChemblInteractions
CACNA1D	CACNA1D	Definite	CACNA1D	DRONEDARONE HYDROCHLORIDE	blocker	ChemblInteractions
CACNA1D	CACNA1D	Definite	CACNA1D	VERAPAMIL	blocker|inhibitor	TdgClinicalTrial|TEND|GuideToPharmacology	19125880
CACNA1D	CACNA1D	Definite	CACNA1D	AMLODIPINE MALEATE	blocker	ChemblInteractions
CACNA1D	CACNA1D	Definite	CACNA1D	AMLODIPINE	inhibitor	TdgClinicalTrial|GuideToPharmacology	19029287
CACNA1D	CACNA1D	Definite	CACNA1D	NIFEDIPINE	blocker|inhibitor	ChemblInteractions|GuideToPharmacology	19029287|11160515
CACNA1D	CACNA1D	Definite	CACNA1D	CLEVIDIPINE	blocker	TdgClinicalTrial|ChemblInteractions	15492770
CACNA1D	CACNA1D	Definite	CACNA1D	AMLODIPINE BESYLATE	blocker	ChemblInteractions
CACNA1D	CACNA1D	Definite	CACNA1D	GABAPENTIN ENACARBIL	modulator	ChemblInteractions
CACNA1D	CACNA1D	Definite	CACNA1D	ATAGABALIN	modulator	ChemblInteractions
CACNA1D	CACNA1D	Definite	CACNA1D	NISOLDIPINE	inhibitor|blocker	ChemblInteractions	19029287
CACNA1D	CACNA1D	Definite	CACNA1D	NICARDIPINE HYDROCHLORIDE	blocker	ChemblInteractions
CACNA1D	CACNA1D	Definite	CACNA1D	NIMODIPINE	inhibitor|blocker	ChemblInteractions	20661350|17705883|19029287|20335610|20334460|19844625
CACNA1D	CACNA1D	Definite	CACNA1D	AZD1305	blocker	ChemblInteractions
CACNA1D	CACNA1D	Definite	CACNA1D	BEPRIDIL HYDROCHLORIDE	blocker	ChemblInteractions
CACNA1D	CACNA1D	Definite	CACNA1D	AZIDOPINE	inhibitor	GuideToPharmacology
CACNA1D	CACNA1D	Definite	CACNA1D	ELPETRIGINE	blocker	ChemblInteractions
CACNA1D	CACNA1D	Definite	CACNA1D	DILTIAZEM MALATE	blocker	ChemblInteractions
CACNA1D	CACNA1D	Definite	CACNA1D	NITRENDIPINE	inhibitor	GuideToPharmacology	19029287|1846597
CACNA1D	CACNA1D	Definite	CACNA1D	IMAGABALIN	modulator	ChemblInteractions
CACNA1D	CACNA1D	Definite	CACNA1D	DILTIAZEM HYDROCHLORIDE	blocker	ChemblInteractions
CACNA1D	CACNA1D	Definite	CACNA1D	PREGABALIN	modulator	ChemblInteractions
HCN1	HCN1	Definite	HCN1	TRAMADOL		PharmGKB	30971809
HCN1	HCN1	Definite	HCN1	ZATEBRADINE	blocker	GuideToPharmacology
HCN1	HCN1	Definite	HCN1	IVABRADINE	blocker	GuideToPharmacology
HCN1	HCN1	Definite	HCN1	CILOBRADINE	blocker	GuideToPharmacology
NR1H3	NR1H3	Definite	NR1H3	CHEMBL493241		DTC	18800767|22873709
NR1H3	NR1H3	Definite	NR1H3	T091317	agonist	DTC|GuideToPharmacology	22579484|24480357|24268541|10592235
NR1H3	NR1H3	Definite	NR1H3	PAXILLINE	agonist	GuideToPharmacology
NR1H3	NR1H3	Definite	NR1H3	LXR-623	agonist	ChemblInteractions
NR1H3	NR1H3	Definite	NR1H3	CHEMBL59030	agonist	DTC|GuideToPharmacology	18800767
NR1H3	NR1H3	Definite	NR1H3	BMS-852927	modulator	ChemblInteractions
NR1H3	NR1H3	Definite	NR1H3	CHEMBL1243244		DTC	24480357|24268541
NR1H3	NR1H3	Definite	NR1H3	GSK-4112		DTC	23656296
NR1H3	NR1H3	Definite	NR1H3	BEXAROTENE		DTC
NR1H3	NR1H3	Definite	NR1H3	HESPERETIN		DTC	22429094
NR1H3	NR1H3	Definite	NR1H3	RICCARDI C		DTC	19103488
NR1H3	NR1H3	Definite	NR1H3	HYODEOXYCHOLIC_ACID	agonist	ChemblInteractions
NR1H3	NR1H3	Definite	NR1H3	DESMOSTEROL	agonist	DTC|GuideToPharmacology	23910990
NR1H3	NR1H3	Definite	NR1H3	CHEMBL1093266	antagonist	GuideToPharmacology
NR1H3	NR1H3	Definite	NR1H3	VERAPAMIL		PharmGKB	21562465
NR1H3	NR1H3	Definite	NR1H3	CS-8080	agonist	ChemblInteractions
NR1H3	NR1H3	Definite	NR1H3	CHEMBL2204435		DTC	22579484
NR1H3	NR1H3	Definite	NR1H3	ATENOLOL		PharmGKB	21562465
NR1H3	NR1H3	Definite	NR1H3	SR9011		DTC	23656296
ALDH5A1	ALDH5A1	Definite	ALDH5A1	VALPROATE SODIUM	inhibitor	ChemblInteractions
ALDH5A1	ALDH5A1	Definite	ALDH5A1	CHLORMERODRIN	inhibitor	TTD	5692397|11752352|17139284|17016423
ALDH5A1	ALDH5A1	Definite	ALDH5A1	METHADONE		PharmGKB	24230997
ALDH5A1	ALDH5A1	Definite	ALDH5A1	DIVALPROEX SODIUM	inhibitor	ChemblInteractions
ALDH5A1	ALDH5A1	Definite	ALDH5A1	VALPROIC ACID	inhibitor	DTC|ChemblInteractions	11086726
ALDH5A1	ALDH5A1	Definite	ALDH5A1	CHEMBL378577	inhibitor	GuideToPharmacology
MT1JP	MT1JP	Definite	MT1JP	ALCOHOL		NCI	9372231
TPH2	TPH2	Definite	TPH2	TELOTRISTAT	inhibitor|antagonist	ChemblInteractions
TPH2	TPH2	Definite	TPH2	FENCLONINE	inhibitor	GuideToPharmacology
TPH2	TPH2	Definite	TPH2	TELOTRISTAT ETHYL	inhibitor	ChemblInteractions
TPH2	TPH2	Definite	TPH2	FENFLURAMINE	inhibitor	GuideToPharmacology
TPH2	TPH2	Definite	TPH2	RODATRISTAT	inhibitor	GuideToPharmacology
TPH2	TPH2	Definite	TPH2	MIRTAZAPINE		PharmGKB	18496129
TPH2	TPH2	Definite	TPH2	CITALOPRAM		PharmGKB	23510446
TPH2	TPH2	Definite	TPH2	VENLAFAXINE		PharmGKB	18496129
NCAM1	NCAM1	Definite	NCAM1	ONCOLYSIN S		ChemblInteractions
NCAM1	NCAM1	Definite	NCAM1	LORVOTUZUMAB MERTANSINE		ChemblInteractions
NCAM1	NCAM1	Definite	NCAM1	DULOXETINE		PharmGKB	28696415
PAH	PAH	Definite	PAH	SAPROPTERIN		TdgClinicalTrial|TEND
PAH	PAH	Definite	PAH	SAPROPTERIN DIHYDROCHLORIDE	activator	ChemblInteractions
PAH	PAH	Definite	PAH	CARBOCYSTEINE		PharmGKB	19036622
PAH	PAH	Definite	PAH	SAPROPTERIN	activator|cofactor	TdgClinicalTrial|TEND|GuideToPharmacology	10839989|10924272|10089284|10872454|11163771
PAH	PAH	Definite	PAH	FENCLONINE	inhibitor	GuideToPharmacology
PAH	PAH	Definite	PAH	PEGVALIASE		TTD
ERBB4	ERBB4	Definite	ERBB4	PALIPERIDONE		PharmGKB	25714000
ERBB4	ERBB4	Definite	ERBB4	PELITINIB	inhibitor	TALC|MyCancerGenome
ERBB4	ERBB4	Definite	ERBB4	ERLOTINIB		DTC|JAX-CKB|PharmGKB	27207775
ERBB4	ERBB4	Definite	ERBB4	AC-480	inhibitor	TALC|MyCancerGenome|TdgClinicalTrial|ChemblInteractions|GuideToPharmacology
ERBB4	ERBB4	Definite	ERBB4	AFATINIB	inhibitor	JAX-CKB|CGI	27207775
ERBB4	ERBB4	Definite	ERBB4	LAPATINIB		DTC|JAX-CKB|CGI|DoCM|CIViC|PharmGKB	25590338|19718025
ERBB4	ERBB4	Definite	ERBB4	ILORASERTIB		DTC
ERBB4	ERBB4	Definite	ERBB4	CETUXIMAB		JAX-CKB	27207775
ERBB4	ERBB4	Definite	ERBB4	JNJ-26483327	inhibitor	ChemblInteractions
ERBB4	ERBB4	Definite	ERBB4	AZD-1152-HQPA		DTC
ERBB4	ERBB4	Definite	ERBB4	IBRUTINIB	inhibitor	GuideToPharmacology
ERBB4	ERBB4	Definite	ERBB4	DACOMITINIB	inhibitor	TALC|MyCancerGenome|TdgClinicalTrial|ChemblInteractions|GuideToPharmacology|MyCancerGenomeClinicalTrial
ERBB4	ERBB4	Definite	ERBB4	CURCUMIN		DTC	25753330
ERBB4	ERBB4	Definite	ERBB4	LAUROGUADINE		DTC
ERBB4	ERBB4	Definite	ERBB4	SP-600125		DTC
ERBB4	ERBB4	Definite	ERBB4	TUCATINIB	inhibitor	GuideToPharmacology
ERBB4	ERBB4	Definite	ERBB4	ALLITINIB	inhibitor	GuideToPharmacology
ERBB4	ERBB4	Definite	ERBB4	GEFITINIB	inhibitor	DTC|MyCancerGenomeClinicalTrial|PharmGKB
ERBB4	ERBB4	Definite	ERBB4	METHYLCURCUMIN		DTC	25753330
ERBB4	ERBB4	Definite	ERBB4	R-406		DTC
ERBB4	ERBB4	Definite	ERBB4	DIMETHYLCURCUMIN		DTC	25753330
ERBB4	ERBB4	Definite	ERBB4	AEE-788	inhibitor	GuideToPharmacology
ERBB4	ERBB4	Definite	ERBB4	POZIOTINIB	inhibitor	ChemblInteractions|GuideToPharmacology|MyCancerGenomeClinicalTrial
ERBB4	ERBB4	Definite	ERBB4	SB-220025		DTC
ERBB4	ERBB4	Definite	ERBB4	BMS-690514	inhibitor	TALC|MyCancerGenome|ChemblInteractions
ERBB4	ERBB4	Definite	ERBB4	TAK-715		DTC
ERBB4	ERBB4	Definite	ERBB4	OSIMERTINIB MESYLATE	inhibitor	ChemblInteractions
ERBB4	ERBB4	Definite	ERBB4	AFATINIB DIMALEATE	inhibitor	ChemblInteractions
ERBB4	ERBB4	Definite	ERBB4	TAE-684		DTC
ERBB4	ERBB4	Definite	ERBB4	CENISERTIB		DTC
ERBB4	ERBB4	Definite	ERBB4	VANDETANIB	inhibitor	ChemblInteractions
ERBB4	ERBB4	Definite	ERBB4	DASATINIB		DTC
ERBB4	ERBB4	Definite	ERBB4	CHEMBL578061		DTC
ERBB4	ERBB4	Definite	ERBB4	CANERTINIB DIHYDROCHLORIDE	inhibitor	ChemblInteractions
ERBB4	ERBB4	Definite	ERBB4	RG-1530		DTC
ERBB4	ERBB4	Definite	ERBB4	ACALABRUTINIB	inhibitor	GuideToPharmacology
ERBB4	ERBB4	Definite	ERBB4	ALISERTIB		DTC
ERBB4	ERBB4	Definite	ERBB4	CEDIRANIB		DTC
PTPA	PTPA	Definite	PTPA	LB-100		TTD
CLU	CLU	Definite	CLU	CUSTIRSEN SODIUM	inhibitor	TdgClinicalTrial|CancerCommons
CLU	CLU	Definite	CLU	CUSTIRSEN	antisense oligonucleotide	TALC
CLU	CLU	Definite	CLU	LUBIPROSTONE		TdgClinicalTrial
SULT1A3	SULT1A3	Definite	SULT1A3	ACETAMINOPHEN		PharmGKB	23462933|26049587
SULT1A3	SULT1A3	Definite	SULT1A3	TRAMADOL		PharmGKB
SULT1A3	SULT1A3	Definite	SULT1A3	TAPENTADOL		PharmGKB
AGT	AGT	Definite	AGT	QUINAPRIL		NCI|PharmGKB	12693379|11849656
AGT	AGT	Definite	AGT	CHLORTHALIDONE		PharmGKB
AGT	AGT	Definite	AGT	HYDROCORTISONE		NCI	15576665
AGT	AGT	Definite	AGT	ATENOLOL		PharmGKB	11593098|14700505
AGT	AGT	Definite	AGT	IRBESARTAN		PharmGKB	11593098|15614026|14700505
AGT	AGT	Definite	AGT	AMLODIPINE		PharmGKB
AGT	AGT	Definite	AGT	LISINOPRIL		PharmGKB
AGT	AGT	Definite	AGT	BENAZEPRIL		PharmGKB	17261659|25143324
AGT	AGT	Definite	AGT	IMIDAPRIL		PharmGKB	25143324
AGT	AGT	Definite	AGT	CYT006-ANGQB		TdgClinicalTrial
AGT	AGT	Definite	AGT	ASPIRIN		PharmGKB	20824505
AGT	AGT	Definite	AGT	ADRIAMYCIN		NCI	7581027
AGT	AGT	Definite	AGT	ENALAPRIL		NCI	11928713
AGT	AGT	Definite	AGT	MESTRANOL		NCI	3023023
KHK	KHK	Definite	KHK	FRUCTOSE		PharmGKB	24915143
NT5C2	NT5C2	Definite	NT5C2	DIDANOSINE		PharmGKB	23315321
NT5C2	NT5C2	Definite	NT5C2	GEMCITABINE		PharmGKB	22838949|24300978
NT5C2	NT5C2	Definite	NT5C2	MERCAPTOPURINE		CIViC|PharmGKB	15990089|23377183|23377281
NT5C2	NT5C2	Definite	NT5C2	THIOGUANINE		CIViC	23377183|23377281
NT5C2	NT5C2	Definite	NT5C2	CYTARABINE		PharmGKB
ATG16L1	ATG16L1	Definite	ATG16L1	ADALIMUMAB		PharmGKB	25712183
IMPDH1	IMPDH1	Definite	IMPDH1	RIBAVIRIN	inhibitor	ChemblInteractions|GuideToPharmacology|TTD	16293677|16152757|16421290|11752352
IMPDH1	IMPDH1	Definite	IMPDH1	MERCAPTOPURINE	inhibitor	TTD	11752352|18506437
IMPDH1	IMPDH1	Definite	IMPDH1	TARIBAVIRIN HYDROCHLORIDE		TTD
IMPDH1	IMPDH1	Definite	IMPDH1	MYCOPHENOLATE MOFETIL	inhibitor	ChemblInteractions
IMPDH1	IMPDH1	Definite	IMPDH1	MYCOPHENOLIC ACID	inhibitor	ChemblInteractions
IMPDH1	IMPDH1	Definite	IMPDH1	MIZORIBINE		TTD
IMPDH1	IMPDH1	Definite	IMPDH1	THIOGUANINE	inhibitor	ChemblInteractions|GuideToPharmacology
IMPDH1	IMPDH1	Definite	IMPDH1	TIAZOFURIN		TTD
IMPDH1	IMPDH1	Definite	IMPDH1	AVN-944		TdgClinicalTrial
IMPDH1	IMPDH1	Definite	IMPDH1	MYCOPHENOLATE MOFETIL HYDROCHLORIDE	inhibitor	ChemblInteractions
RABGAP1L	RABGAP1L	Definite	RABGAP1L	ALCOHOL		PharmGKB
CD34	CD34	Definite	CD34	PREDNISOLONE		NCI	7532164
CD34	CD34	Definite	CD34	PUROMYCIN		NCI	11973349
CD34	CD34	Definite	CD34	FLUDEOXYGLUCOSE-F18		NCI	16513610
CD34	CD34	Definite	CD34	QUERCETIN		NCI	1772777
NDUFA6	NDUFA6	Definite	NDUFA6	ME-344	inhibitor	ChemblInteractions
NDUFA6	NDUFA6	Definite	NDUFA6	NV-128	inhibitor	ChemblInteractions
NDUFA6	NDUFA6	Definite	NDUFA6	METFORMIN HYDROCHLORIDE	inhibitor	ChemblInteractions
GNL3	GNL3	Definite	GNL3	CYCLOPHOSPHAMIDE		PharmGKB
GNL3	GNL3	Definite	GNL3	EPIRUBICIN		PharmGKB
GNL3	GNL3	Definite	GNL3	FLUOROURACIL		PharmGKB
TPBG	TPBG	Definite	TPBG	NAPTUMOMAB ESTAFENATOX		ChemblInteractions
TPBG	TPBG	Definite	TPBG	ANATUMOMAB MAFENATOX		ChemblInteractions
TPBG	TPBG	Definite	TPBG	TROVAX		TTD
TPBG	TPBG	Definite	TPBG	PF-06263507		TTD
ADRA1A	ADRA1A	Definite	ADRA1A	ASENAPINE	antagonist	TdgClinicalTrial	18308814
ADRA1A	ADRA1A	Definite	ADRA1A	PHENYLEPHRINE BITARTRATE	agonist	ChemblInteractions
ADRA1A	ADRA1A	Definite	ADRA1A	OXYMETAZOLINE	agonist	TdgClinicalTrial|TEND|GuideToPharmacology	11527538|8564226|8768700|11774707|8894610
ADRA1A	ADRA1A	Definite	ADRA1A	CLOZAPINE	antagonist	GuideToPharmacology	17848919
ADRA1A	ADRA1A	Definite	ADRA1A	LISDEXAMFETAMINE		TdgClinicalTrial|TEND
ADRA1A	ADRA1A	Definite	ADRA1A	RISPERIDONE	antagonist	GuideToPharmacology	15992090|18542932|8925876|11132243|25943458|7691623|15907153
ADRA1A	ADRA1A	Definite	ADRA1A	PHENYLPROPANOLAMINE	agonist	TdgClinicalTrial|TEND	12163120|2881994|9164583|15163201|17016423
ADRA1A	ADRA1A	Definite	ADRA1A	PHENYLEPHRINE	agonist	TdgClinicalTrial|TEND|GuideToPharmacology|PharmGKB	17658513|17584443
ADRA1A	ADRA1A	Definite	ADRA1A	PERICIAZINE		TdgClinicalTrial|TEND
ADRA1A	ADRA1A	Definite	ADRA1A	TERAZOSIN	antagonist	TdgClinicalTrial|TEND|GuideToPharmacology	8736427|9732824|14767264|9352700|10503165|11752352
ADRA1A	ADRA1A	Definite	ADRA1A	AMIODARONE		TdgClinicalTrial|TEND
ADRA1A	ADRA1A	Definite	ADRA1A	PHENTOLAMINE	antagonist	TdgClinicalTrial|GuideToPharmacology	6176798|7562640|1346768
ADRA1A	ADRA1A	Definite	ADRA1A	PHENTOLAMINE MESYLATE	antagonist	ChemblInteractions
ADRA1A	ADRA1A	Definite	ADRA1A	SILODOSIN	antagonist	TdgClinicalTrial|ChemblInteractions|TEND|GuideToPharmacology|TTD	21114397
ADRA1A	ADRA1A	Definite	ADRA1A	NEFAZODONE	antagonist	TdgClinicalTrial|TEND	7649970|7855217
ADRA1A	ADRA1A	Definite	ADRA1A	SERTINDOLE		TdgClinicalTrial|TEND	16925508|11594443
ADRA1A	ADRA1A	Definite	ADRA1A	DROXIDOPA	agonist	ChemblInteractions	20412040|11482743|8825367|17266602|9138687
ADRA1A	ADRA1A	Definite	ADRA1A	TERAZOSIN HYDROCHLORIDE HYDRATE	antagonist	ChemblInteractions
ADRA1A	ADRA1A	Definite	ADRA1A	NAPHAZOLINE HYDROCHLORIDE	agonist	ChemblInteractions
ADRA1A	ADRA1A	Definite	ADRA1A	PRAZOSIN	antagonist	TdgClinicalTrial|TEND|GuideToPharmacology	15258254|17658513|8925876|14980979|10771044|7855217|7691623|12841945
ADRA1A	ADRA1A	Definite	ADRA1A	ZIPRASIDONE	antagonist	TEND	17848919|20075651
ADRA1A	ADRA1A	Definite	ADRA1A	DEBRISOQUIN		TdgClinicalTrial|TEND
ADRA1A	ADRA1A	Definite	ADRA1A	ISOPROTERENOL		PharmGKB
ADRA1A	ADRA1A	Definite	ADRA1A	OLANZAPINE	antagonist	TdgClinicalTrial	17848919|25032030|10227113
ADRA1A	ADRA1A	Definite	ADRA1A	EPINEPHRINE	agonist	TdgClinicalTrial|ChemblInteractions|TEND|PharmGKB	20412040|17658513|17603545|20857090
ADRA1A	ADRA1A	Definite	ADRA1A	MEPHENTERMINE SULFATE	agonist	ChemblInteractions
ADRA1A	ADRA1A	Definite	ADRA1A	NOREPINEPHRINE	agonist	TdgClinicalTrial|TEND|PharmGKB	8825367|17139284|17016423|17266602|9138687
ADRA1A	ADRA1A	Definite	ADRA1A	MEPHENTERMINE	agonist	TdgClinicalTrial|TEND	10722|21182601
ADRA1A	ADRA1A	Definite	ADRA1A	NICERGOLINE	antagonist	TdgClinicalTrial|TEND	10027088
ADRA1A	ADRA1A	Definite	ADRA1A	HYDROXYAMPHETAMINE HYDROBROMIDE	agonist	ChemblInteractions
ADRA1A	ADRA1A	Definite	ADRA1A	MIDODRINE HYDROCHLORIDE	agonist	ChemblInteractions
ADRA1A	ADRA1A	Definite	ADRA1A	METARAMINOL BITARTRATE	agonist	ChemblInteractions
ADRA1A	ADRA1A	Definite	ADRA1A	TAMSULOSIN HYDROCHLORIDE	antagonist	ChemblInteractions
ADRA1A	ADRA1A	Definite	ADRA1A	TERGURIDE	antagonist	GuideToPharmacology
ADRA1A	ADRA1A	Definite	ADRA1A	METARAMINOL	agonist	TdgClinicalTrial|TEND	17139284|17016423|9663612
ADRA1A	ADRA1A	Definite	ADRA1A	DRONEDARONE	antagonist	TdgClinicalTrial|TEND	17389667|23997577
ADRA1A	ADRA1A	Definite	ADRA1A	PSEUDOEPHEDRINE	agonist	TdgClinicalTrial|TEND	11772135|17139284|17016423|7507588
ADRA1A	ADRA1A	Definite	ADRA1A	TRIMIPRAMINE MALEATE	antagonist	ChemblInteractions
ADRA1A	ADRA1A	Definite	ADRA1A	LABETALOL	antagonist	TdgClinicalTrial|TEND	6355664|8104240|10529655|1358746|7684671|2696507|17686376
ADRA1A	ADRA1A	Definite	ADRA1A	DOPAMINE		PharmGKB
ADRA1A	ADRA1A	Definite	ADRA1A	DAPIPRAZOLE	antagonist	TdgClinicalTrial|TEND	9401944|17139284|17016423
ADRA1A	ADRA1A	Definite	ADRA1A	TAMSULOSIN	antagonist	TdgClinicalTrial|TEND|GuideToPharmacology|TTD	8647141|8647140|9352698|9352700|10503165|11752352|14680444|19427736
ADRA1A	ADRA1A	Definite	ADRA1A	BENZPHETAMINE	agonist	TdgClinicalTrial|TEND	25499957|17139284|17016423
ADRA1A	ADRA1A	Definite	ADRA1A	RAUWOLFIA SERPENTINA	antagonist	ChemblInteractions
ADRA1A	ADRA1A	Definite	ADRA1A	KETANSERIN	antagonist	GuideToPharmacology
ADRA1A	ADRA1A	Definite	ADRA1A	MEDETOMIDINE		TTD
ADRA1A	ADRA1A	Definite	ADRA1A	PRAZOSIN HYDROCHLORIDE	antagonist	ChemblInteractions
ADRA1A	ADRA1A	Definite	ADRA1A	ALFUZOSIN	antagonist	TdgClinicalTrial|TEND|GuideToPharmacology	12892027|15639685|8799556|16553574|8196478|9223558|9122046|11752352|9870119|11750253|16613526
ADRA1A	ADRA1A	Definite	ADRA1A	NOREPINEPHRINE BITARTRATE	agonist	ChemblInteractions
ADRA1A	ADRA1A	Definite	ADRA1A	DOXAZOSIN	antagonist	TdgClinicalTrial|TEND|GuideToPharmacology	19002123|18304211|8736427|10393471|14767264|9223558|9205965|17070143|15573147|11752352|16225542
ADRA1A	ADRA1A	Definite	ADRA1A	CHEMBL56331	antagonist	GuideToPharmacology
ADRA1A	ADRA1A	Definite	ADRA1A	NAFTOPIDIL		TTD
ADRA1A	ADRA1A	Definite	ADRA1A	THIORIDAZINE	antagonist	TdgClinicalTrial|TEND	7691623|15695070
ADRA1A	ADRA1A	Definite	ADRA1A	METHOXAMINE HYDROCHLORIDE	agonist	ChemblInteractions
ADRA1A	ADRA1A	Definite	ADRA1A	PIRIBEDIL	antagonist	GuideToPharmacology
ADRA1A	ADRA1A	Definite	ADRA1A	CARVEDILOL	potentiator|inhibitor|antagonist	TdgClinicalTrial|ChemblInteractions|TEND	24368739|17139284|19919991|17016423
ADRA1A	ADRA1A	Definite	ADRA1A	MIDODRINE	agonist	TdgClinicalTrial|TEND	12163120|9007522|15163201
ADRA1A	ADRA1A	Definite	ADRA1A	TRAZODONE	antagonist	TEND	30776014|7855217
ADRA1A	ADRA1A	Definite	ADRA1A	RITANSERIN	antagonist	GuideToPharmacology
ADRA1A	ADRA1A	Definite	ADRA1A	PARDOPRUNOX		TdgClinicalTrial
ADRA1A	ADRA1A	Definite	ADRA1A	DIPIVEFRIN HYDROCHLORIDE	agonist	ChemblInteractions
ADRA1A	ADRA1A	Definite	ADRA1A	ALFUZOSIN HYDROCHLORIDE	agonist	ChemblInteractions|TTD
ADRA1A	ADRA1A	Definite	ADRA1A	SENREBOTASE		TdgClinicalTrial
ADRA1A	ADRA1A	Definite	ADRA1A	ERGOLOID MESYLATES	antagonist	ChemblInteractions
ADRA1A	ADRA1A	Definite	ADRA1A	METHAMPHETAMINE		TEND
ADRA1A	ADRA1A	Definite	ADRA1A	TETRAHYDROZOLINE HYDROCHLORIDE	agonist	ChemblInteractions	18259967
ADRA1A	ADRA1A	Definite	ADRA1A	EPINEPHRINE BITARTRATE	agonist	ChemblInteractions
ADRA1A	ADRA1A	Definite	ADRA1A	LABETALOL HYDROCHLORIDE	antagonist	ChemblInteractions
ADRA1A	ADRA1A	Definite	ADRA1A	SPIPERONE	antagonist	GuideToPharmacology
ADRA1A	ADRA1A	Definite	ADRA1A	PHENOXYBENZAMINE	antagonist	TdgClinicalTrial|TEND	8935707|1978244|7911719|10401556|12818701
ADRA1A	ADRA1A	Definite	ADRA1A	EPHEDRINE	agonist	TdgClinicalTrial|TEND	31613441|17405867|12557268|10592235
ADRA1A	ADRA1A	Definite	ADRA1A	MIANSERIN	antagonist	GuideToPharmacology
ADRA1A	ADRA1A	Definite	ADRA1A	PHENYLEPHRINE HYDROCHLORIDE	agonist	ChemblInteractions
ADRA1A	ADRA1A	Definite	ADRA1A	TRIFLUOPERAZINE	antagonist	TdgClinicalTrial|TEND	8150214|17139284|17016423|6135146
ADRA1A	ADRA1A	Definite	ADRA1A	NIFEDIPINE		PharmGKB	19444285
ADRA1A	ADRA1A	Definite	ADRA1A	PROMAZINE	antagonist	TdgClinicalTrial|TEND	19110200|17139284|17016423|22565090
ADRA1A	ADRA1A	Definite	ADRA1A	PHENOXYBENZAMINE HYDROCHLORIDE	antagonist	ChemblInteractions
ADRA1A	ADRA1A	Definite	ADRA1A	PROPIOMAZINE	antagonist	TdgClinicalTrial|TEND	19110200|17139284|17016423|14488364
ADRA1A	ADRA1A	Definite	ADRA1A	LEVOMEPROMAZINE	antagonist	TdgClinicalTrial|TEND	2870716|15701205
ADRA1A	ADRA1A	Definite	ADRA1A	UPIDOSIN	antagonist	GuideToPharmacology
ADRA1A	ADRA1A	Definite	ADRA1A	PHENDIMETRAZINE	agonist	TdgClinicalTrial|TEND	16265126|17139284|17016423|17017961|11054601
ADRA1A	ADRA1A	Definite	ADRA1A	BETHANIDINE		TdgClinicalTrial|TEND
ADRA1A	ADRA1A	Definite	ADRA1A	ALSEROXYLON	antagonist	ChemblInteractions
ADRA1A	ADRA1A	Definite	ADRA1A	DOXAZOSIN MESYLATE	antagonist	ChemblInteractions
ADRA1A	ADRA1A	Definite	ADRA1A	TOLAZOLINE HYDROCHLORIDE	antagonist	ChemblInteractions
ADRA1A	ADRA1A	Definite	ADRA1A	DABUZALGRON	partial agonist|agonist	ChemblInteractions|GuideToPharmacology
ADRA1A	ADRA1A	Definite	ADRA1A	TOLAZOLINE	antagonist	TdgClinicalTrial|TEND	16368348|17139284|11938943|17016423
ADRA1A	ADRA1A	Definite	ADRA1A	CARVEDILOL PHOSPHATE	antagonist	ChemblInteractions
ADRA1A	ADRA1A	Definite	ADRA1A	A-123189	antagonist	GuideToPharmacology
ADRA1A	ADRA1A	Definite	ADRA1A	DAPIPRAZOLE HYDROCHLORIDE	antagonist	ChemblInteractions
ADRA1A	ADRA1A	Definite	ADRA1A	ROXINDOLE	antagonist	GuideToPharmacology
ADRA1A	ADRA1A	Definite	ADRA1A	CHEMBL88272	antagonist	GuideToPharmacology
ADRA1A	ADRA1A	Definite	ADRA1A	SPIROXATRINE	antagonist	GuideToPharmacology
ADRA1A	ADRA1A	Definite	ADRA1A	TEDATIOXETINE	antagonist	TdgClinicalTrial|ChemblInteractions
ADRA1A	ADRA1A	Definite	ADRA1A	PHENYLPROPANOLAMINE HYDROCHLORIDE	agonist	ChemblInteractions
ADRA1A	ADRA1A	Definite	ADRA1A	BMY-7378	antagonist	GuideToPharmacology
ADRA1A	ADRA1A	Definite	ADRA1A	A-119637	antagonist	GuideToPharmacology
ADRA1A	ADRA1A	Definite	ADRA1A	PHENYLPROPANOLAMINE POLISTIREX	agonist	ChemblInteractions
ADRA1A	ADRA1A	Definite	ADRA1A	CYPROHEPTADINE	antagonist	GuideToPharmacology
ADRA1A	ADRA1A	Definite	ADRA1A	METHOXAMINE	agonist	TdgClinicalTrial|TEND|GuideToPharmacology|PharmGKB	7875228|7511752|1978244|1680715|8986981
ADRA1A	ADRA1A	Definite	ADRA1A	NS-49	agonist	GuideToPharmacology
ADRA1A	ADRA1A	Definite	ADRA1A	OXYMETAZOLINE HYDROCHLORIDE	agonist	ChemblInteractions
ADRA1A	ADRA1A	Definite	ADRA1A	INDORAMIN	antagonist	GuideToPharmacology	7536677|8183249
ADRA1A	ADRA1A	Definite	ADRA1A	CABERGOLINE	antagonist|binder	GuideToPharmacology	12388666
ADRA1A	ADRA1A	Definite	ADRA1A	ILOPERIDONE	antagonist	TdgClinicalTrial	23545936
ADRA1A	ADRA1A	Definite	ADRA1A	LISURIDE	antagonist	GuideToPharmacology
ADRA1A	ADRA1A	Definite	ADRA1A	AMPHETAMINE	agonist	TEND	6245760|4399738
ADRA1A	ADRA1A	Definite	ADRA1A	BESIPIRDINE		TTD
CD47	CD47	Definite	CD47	ABT-510		TdgClinicalTrial
CD47	CD47	Definite	CD47	ALX-148		TTD
CD47	CD47	Definite	CD47	MAGROLIMAB		TTD
TGM2	TGM2	Definite	TGM2	DEFEROXAMINE		NCI	9194688
TGM2	TGM2	Definite	TGM2	SIROLIMUS		NCI	16127150
TGM2	TGM2	Definite	TGM2	ACIVICIN		NCI	12670536
TGM2	TGM2	Definite	TGM2	LEVAMISOLE		NCI	17669706
TGM2	TGM2	Definite	TGM2	MIDAZOLAM		NCI	17093965
TGM2	TGM2	Definite	TGM2	DOXORUBICIN		NCI	18174247
TGM2	TGM2	Definite	TGM2	GARLIC		NCI	12125104
TGM2	TGM2	Definite	TGM2	TAMOXIFEN		NCI	9067554
TGM2	TGM2	Definite	TGM2	ATORVASTATIN		NCI	15313180
TGM2	TGM2	Definite	TGM2	CORTICOTROPIN		NCI	2444616
TGM2	TGM2	Definite	TGM2	IONOMYCIN		NCI	9045668
TGM2	TGM2	Definite	TGM2	CISPLATIN		NCI	18667446
TGM2	TGM2	Definite	TGM2	CAMPTOTHECIN		NCI	9758415
TGM2	TGM2	Definite	TGM2	ALCOHOL		NCI	10801782
TGM2	TGM2	Definite	TGM2	PERFOSFAMIDE		NCI	8828830
TGM2	TGM2	Definite	TGM2	THROMBIN		NCI	16202257
TGM2	TGM2	Definite	TGM2	HEPARIN		NCI	15935280
TGM2	TGM2	Definite	TGM2	GENTAMICIN		NCI	8861105
TGM2	TGM2	Definite	TGM2	PROGESTERONE		NCI	8603579
TGM2	TGM2	Definite	TGM2	GEMCITABINE		NCI	17079475
TGM2	TGM2	Definite	TGM2	FINASTERIDE		NCI	7835306
ABCB1	ABCB1	Definite	ABCB1	DAPTOMYCIN		PharmGKB	25239468
ABCB1	ABCB1	Definite	ABCB1	PACLITAXEL		DTC|NCI|CIViC	16289636|15876424|16467099
ABCB1	ABCB1	Definite	ABCB1	AGOMELATINE		PharmGKB
ABCB1	ABCB1	Definite	ABCB1	NICARDIPINE		PharmGKB
ABCB1	ABCB1	Definite	ABCB1	DEXTROMETHORPHAN		NCI	15582917
ABCB1	ABCB1	Definite	ABCB1	VINBLASTINE		DTC	21348461|20363635
ABCB1	ABCB1	Definite	ABCB1	2'-HYDROXYCHALCONE		DTC	22112540
ABCB1	ABCB1	Definite	ABCB1	RANOLAZINE		PharmGKB	24433361
ABCB1	ABCB1	Definite	ABCB1	SPIRONOLACTONE		NCI|PharmGKB	16740618
ABCB1	ABCB1	Definite	ABCB1	TESMILIFENE	inducer	TdgClinicalTrial	16413681|10755318
ABCB1	ABCB1	Definite	ABCB1	PROPRANOLOL		NCI|PharmGKB	15023456
ABCB1	ABCB1	Definite	ABCB1	HETEROCODEINE		DTC	18311899
ABCB1	ABCB1	Definite	ABCB1	RISPERIDONE		PharmGKB	29723928|24589909|26129906|29443543|19997080|23609392
ABCB1	ABCB1	Definite	ABCB1	DENDROAMIDE A		DTC	8786364
ABCB1	ABCB1	Definite	ABCB1	GABAPENTIN		NCI	17328248
ABCB1	ABCB1	Definite	ABCB1	REMIFENTANIL		PharmGKB	29755652
ABCB1	ABCB1	Definite	ABCB1	QUININE		PharmGKB
ABCB1	ABCB1	Definite	ABCB1	ERLOTINIB		PharmGKB
ABCB1	ABCB1	Definite	ABCB1	BIRICODAR		PharmGKB|TTD
ABCB1	ABCB1	Definite	ABCB1	NORTRIPTYLINE		PharmGKB	12082591
ABCB1	ABCB1	Definite	ABCB1	CHEMBL270688		DTC	18257545
ABCB1	ABCB1	Definite	ABCB1	METHYLPREDNISOLONE		PharmGKB	14583680
ABCB1	ABCB1	Definite	ABCB1	GRANISETRON		PharmGKB	29177570|27241063
ABCB1	ABCB1	Definite	ABCB1	VORICONAZOLE		PharmGKB	19033450
ABCB1	ABCB1	Definite	ABCB1	RITONAVIR		DTC|PharmGKB	17324111|26174719|14600574|17664327|24997317|16355344|23996099|28718515|1655344|21288825|25151207|20504240|25622064|17148966|26857335
ABCB1	ABCB1	Definite	ABCB1	MIDAZOLAM		PharmGKB
ABCB1	ABCB1	Definite	ABCB1	VALINOMYCIN		PharmGKB
ABCB1	ABCB1	Definite	ABCB1	PREDNISOLONE		PharmGKB	14583680|25582575
ABCB1	ABCB1	Definite	ABCB1	RESERPINE		DTC|PharmGKB	23273047|22148475
ABCB1	ABCB1	Definite	ABCB1	MORPHINE		DTC|PharmGKB	24703092|25311385|18311899|16580900|29474345|25155932|19514130|17898703
ABCB1	ABCB1	Definite	ABCB1	DELAVIRDINE		DTC	21189339
ABCB1	ABCB1	Definite	ABCB1	ALISKIREN		PharmGKB
ABCB1	ABCB1	Definite	ABCB1	AMIODARONE		PharmGKB
ABCB1	ABCB1	Definite	ABCB1	CELIPROLOL		PharmGKB
ABCB1	ABCB1	Definite	ABCB1	OXYCODONE		PharmGKB	21209234|19514130
ABCB1	ABCB1	Definite	ABCB1	PENTAZOCINE		PharmGKB
ABCB1	ABCB1	Definite	ABCB1	ITRACONAZOLE		NCI|PharmGKB	15969931
ABCB1	ABCB1	Definite	ABCB1	FLUVASTATIN		PharmGKB	16002074
ABCB1	ABCB1	Definite	ABCB1	7-ETHYL-10-HYDROXYCAMPTOTHECIN		PharmGKB
ABCB1	ABCB1	Definite	ABCB1	NIFEDIPINE		NCI	10213372
ABCB1	ABCB1	Definite	ABCB1	BLEOMYCIN		PharmGKB	25637052
ABCB1	ABCB1	Definite	ABCB1	MODAFINIL		PharmGKB	26757307
ABCB1	ABCB1	Definite	ABCB1	DIGOXIN		NCI	15969931|16674925
ABCB1	ABCB1	Definite	ABCB1	MURUCOIDIN V		DTC	22148475
ABCB1	ABCB1	Definite	ABCB1	ONDANSETRON		PharmGKB	25012726|20707787
ABCB1	ABCB1	Definite	ABCB1	PREDNISONE		PharmGKB	12175731|25637052
ABCB1	ABCB1	Definite	ABCB1	PURGIN II		DTC	23273047
ABCB1	ABCB1	Definite	ABCB1	RITUXIMAB		NCI|PharmGKB	25637052|16971809
ABCB1	ABCB1	Definite	ABCB1	CHEMBL217425		DTC	18257545
ABCB1	ABCB1	Definite	ABCB1	IDARUBICIN		PharmGKB	25558979|20938465|25567217|16331627
ABCB1	ABCB1	Definite	ABCB1	TENIPOSIDE		PharmGKB
ABCB1	ABCB1	Definite	ABCB1	PRAVASTATIN		NCI|PharmGKB	19667110|15616150
ABCB1	ABCB1	Definite	ABCB1	CYCLOSPORINE		DTC|NCI|PharmGKB	21348461|24720452|17964170|23922006|1972761|11754602|18334915|18444945|24088131|23017888|21806386|25536375|24992153|17206635|25240575|26107754|18576903|12966368|18717915|20030680|22886152
ABCB1	ABCB1	Definite	ABCB1	NEFAZODONE		PharmGKB	21449676
ABCB1	ABCB1	Definite	ABCB1	NELFINAVIR		DTC|PharmGKB	20662624|17664327|20860463|11809184|23734829|16267764|16912956
ABCB1	ABCB1	Definite	ABCB1	TARIQUIDAR	inhibitor	DTC|TdgClinicalTrial|ChemblInteractions|PharmGKB	21657271
ABCB1	ABCB1	Definite	ABCB1	COLCHICINE		TEND|PharmGKB	25876828
ABCB1	ABCB1	Definite	ABCB1	PHENOBARBITAL		NCI|PharmGKB	16928449|25846690
ABCB1	ABCB1	Definite	ABCB1	LOPINAVIR		DTC|PharmGKB	17664327|23996099
ABCB1	ABCB1	Definite	ABCB1	IRINOTECAN		PharmGKB	27845419
ABCB1	ABCB1	Definite	ABCB1	TANGERETIN		DTC
ABCB1	ABCB1	Definite	ABCB1	TAMOXIFEN		PharmGKB
ABCB1	ABCB1	Definite	ABCB1	METHYLPHENIDATE		PharmGKB	23771192
ABCB1	ABCB1	Definite	ABCB1	ADRIAMYCIN		NCI	1363885|11069027
ABCB1	ABCB1	Definite	ABCB1	PROPAFENONE		PharmGKB
ABCB1	ABCB1	Definite	ABCB1	TETRACYCLINE		PharmGKB
ABCB1	ABCB1	Definite	ABCB1	DOXYCYCLINE		NCI|PharmGKB	11850258
ABCB1	ABCB1	Definite	ABCB1	PROPOFOL		PharmGKB	29755652
ABCB1	ABCB1	Definite	ABCB1	CARBOPLATIN		NCI	11157479
ABCB1	ABCB1	Definite	ABCB1	EPIRUBICIN		NCI	15161039
ABCB1	ABCB1	Definite	ABCB1	LAMIVUDINE		PharmGKB	23996099
ABCB1	ABCB1	Definite	ABCB1	CURCUMIN		NCI|PharmGKB	15090070
ABCB1	ABCB1	Definite	ABCB1	FEXOFENADINE		PharmGKB	11503014
ABCB1	ABCB1	Definite	ABCB1	PROGESTERONE		PharmGKB
ABCB1	ABCB1	Definite	ABCB1	DEFEROXAMINE		NCI	12514119
ABCB1	ABCB1	Definite	ABCB1	PAROXETINE		PharmGKB	24192121|18215618|21449676|26704739|22641028
ABCB1	ABCB1	Definite	ABCB1	FLAVOKAWAIN A		DTC	22112540
ABCB1	ABCB1	Definite	ABCB1	CYTARABINE		PharmGKB	25558979|20938465|25567217|16331627
ABCB1	ABCB1	Definite	ABCB1	BISANTRENE		NCI	9816258
ABCB1	ABCB1	Definite	ABCB1	BROMPERIDOL		PharmGKB
ABCB1	ABCB1	Definite	ABCB1	CHEMBL595816		DTC	22112540
ABCB1	ABCB1	Definite	ABCB1	VALGANCICLOVIR		PharmGKB	27402191
ABCB1	ABCB1	Definite	ABCB1	MAPROTILINE		PharmGKB
ABCB1	ABCB1	Definite	ABCB1	QUERCETIN-3'-O-PHOSPHATE		TdgClinicalTrial
ABCB1	ABCB1	Definite	ABCB1	RIFAMPIN		PharmGKB
ABCB1	ABCB1	Definite	ABCB1	TAXOL C		DTC	16289636
ABCB1	ABCB1	Definite	ABCB1	LANSOPRAZOLE		PharmGKB	17190370
ABCB1	ABCB1	Definite	ABCB1	AMITRIPTYLINE		PharmGKB	24192121|18215618|26704739|22641028
ABCB1	ABCB1	Definite	ABCB1	TERFENADINE		NCI|PharmGKB	11454724|10213372|16842392
ABCB1	ABCB1	Definite	ABCB1	AMISULPRIDE		PharmGKB	29443543
ABCB1	ABCB1	Definite	ABCB1	FLUOROURACIL		NCI	16892554
ABCB1	ABCB1	Definite	ABCB1	CLOPIDOGREL		PharmGKB	26362473|24262617|24762860|28135763|17112805|21831410|28914344|25060201|28378058|20801498|27380588|25542807|19106083|25850030|23726091|23364775|22045970|23056288|22940005|21806387|24535487|28358842|28589365|25430046|20650435|21918510|23150151|29397568|20801494|22723959|22190063|22028352|22285300|22990067|22624833
ABCB1	ABCB1	Definite	ABCB1	SIMEPREVIR		PharmGKB
ABCB1	ABCB1	Definite	ABCB1	CAMPTOTHECIN		NCI	9918583
ABCB1	ABCB1	Definite	ABCB1	CARVEDILOL		PharmGKB
ABCB1	ABCB1	Definite	ABCB1	CIMETIDINE		PharmGKB
ABCB1	ABCB1	Definite	ABCB1	FENOFIBRATE		NCI	16316932
ABCB1	ABCB1	Definite	ABCB1	LOPERAMIDE		PharmGKB
ABCB1	ABCB1	Definite	ABCB1	ETOPOSIDE		PharmGKB	12969965
ABCB1	ABCB1	Definite	ABCB1	RANITIDINE		NCI|PharmGKB	9862768
ABCB1	ABCB1	Definite	ABCB1	FLUPHENAZINE		PharmGKB
ABCB1	ABCB1	Definite	ABCB1	QUINIDINE		NCI|PharmGKB	1671173
[truncated: 2,078 more rows]
